# Supplementary material for: Transcriptome-Wide 5-Methylcytosine Profiling of lncRNAs in the Mouse Cerebral Ischemia Model
Source: MDPI journal article supplement (doi:10.3390/ph17030384), 2024-03-18
Supplement: s1 [file s1]

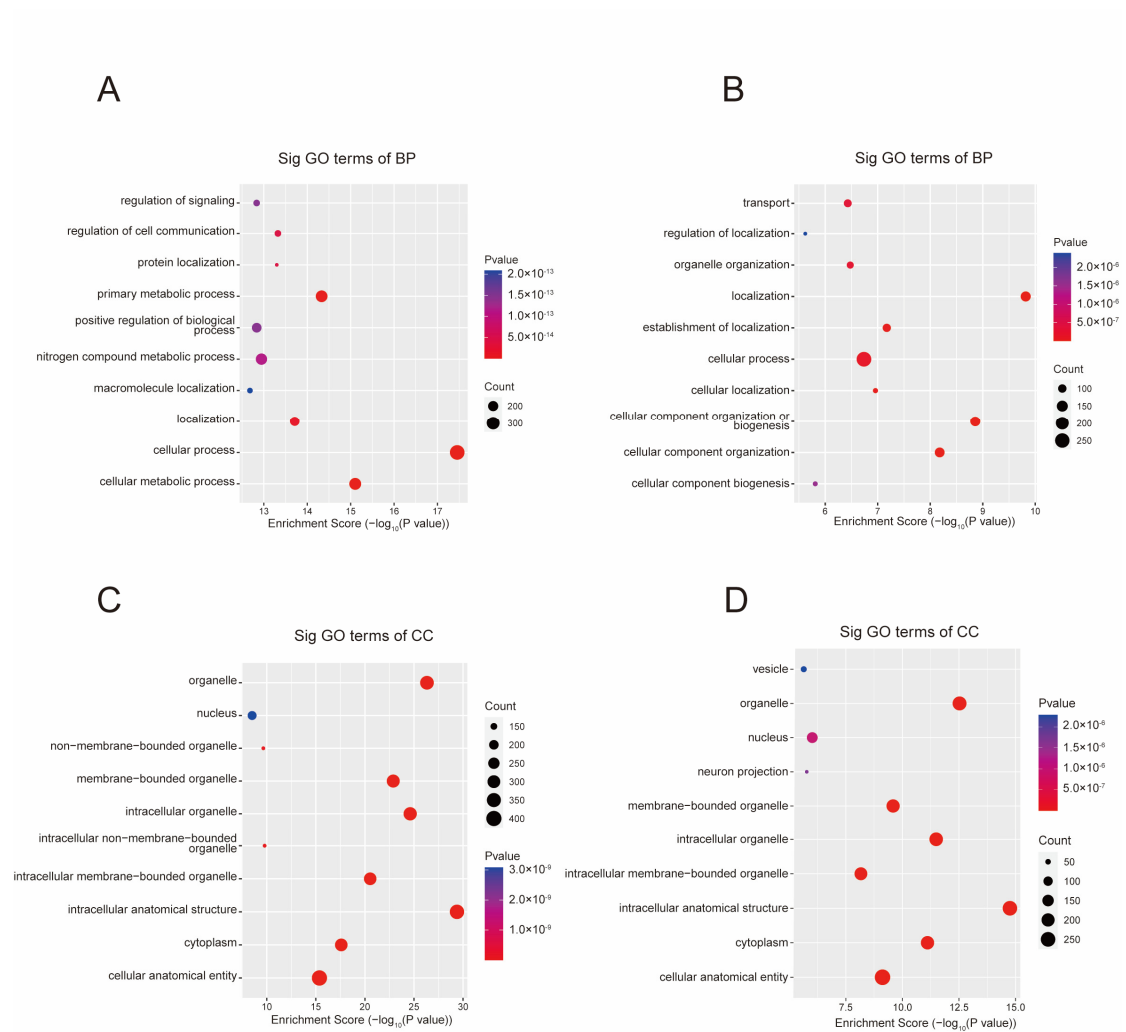

**Figure S1.** BP and CC analysis of differentially methylated lncRNAs. (A): Enriched biological processes (BP) of up-regulated differentially methylated lncRNAs. (B): Enriched biological processes (BP) of down-regulated differentially methylated lncRNAs. (C): cell component (CC) enriched of up-regulated differentially methylated lncRNAs. (D): cell component (CC) enriched of down-regulated differentially methylated lncRNAs.
