# Supplementary material for: Transcriptome-Wide 5-Methylcytosine Profiling of lncRNAs in the Mouse Cerebral Ischemia Model
Source: Pharmaceuticals (Basel). 2024 Mar 18;17(3):384. doi: 10.3390/ph17030384 (PMC10974612; doi:10.3390/ph17030384)
Supplement: Supplementary file 1 [file pharmaceuticals-17-00384-s001.zip › Differentially expressed lncRNAs summary.xlsx]

## Sheet: up_MCAO_vs_Sham
Differentially expressed LncRNAs for: up_MCAO_vs_Sham Fold Change cut-off: 1 P-value cut-off: 1 Column A: Transcript_id, the Ensembl transcript identifier. Column B ~ G: Statistical results, statistical results by edgeR. Column H ~ M: raw counts of all samples of the transcript by htseq. Column N ~ S: normalized counts by edgeR. Column S ~ AF: the annotation of the LncRNA and the genomic organiza…
	MCAO_vs_Sham up regulated LncRNAs
	P-value, Fold change and Regulation						raw counts						Normalized counts						Annotations
transcript_id	logFC	logCPM	F	PValue	FDR	regulation	MCAO-1.Input	MCAO-2.Input	MCAO-3.Input	Sham-1.Input	Sham-2.Input	Sham-3.Input	MCAO-1.Input	MCAO-2.Input	MCAO-3.Input	Sham-1.Input	Sham-2.Input	Sham-3.Input	GeneName	Source	chrom	strand	txStart	txEnd	RNAlength	relationship	Associated_gene_acc	Associated_gene_name	Associated_gene_strand	Associated_gene_start	Associated_gene_end
ENSMUST00000180167	8.71086	3.88133	2.22067	0.274644	0.830383	up	0	0	187	0	0	0	0.0597462	0.0597462	6.34294	0.0597462	0.0597462	0.0597462	Gm10359	Ensembl	chr5	-	105862700	105863702	1002	intergenic
ENSMUST00000127704	6.77593	2.19771	16.1152	5.96372e-05	0.0492273	up	6	22	13	0	0	0	2.19633	3.71847	2.72528	0.0597462	0.0597462	0.0597462	Cdc14a	Ensembl	chr3	-	116326038	116424032	3825	exon sense-overlapping	NM_001080818	Cdc14a	-	116272552	116424032
ENSMUST00000159482	6.36689	1.9001	11.8048	0.000590961	0.225343	up	5	11	16	0	0	0	1.99747	2.8284	2.98156	0.0597462	0.0597462	0.0597462	Kcp	Ensembl	chr6	-	29473161	29484144	2791	natural antisense	NM_001145360	Gm9047	+	29471436	29473429
AK076596	6.23569	1.75983	10.3418	0.0013011	0.385015	up	25	0	0	0	0	0	3.98147	0.0597462	0.0597462	0.0597462	0.0597462	0.0597462	TUname6309	Genbank	chr14	-	95882943	95884433	1491	intergenic
ENSMUST00000117051	6.20938	1.81087	10.6474	0.00110256	0.335766	up	4	1	26	0	0	0	1.76674	0.671968	3.60686	0.0597462	0.0597462	0.0597462	Gm14445	Ensembl	chr2	+	175038120	175041036	1484	intergenic
ENSMUST00000121563	6.15541	1.73241	9.92874	0.00162756	0.42543	up	8	11	7	0	0	0	2.52693	2.8284	2.01501	0.0597462	0.0597462	0.0597462	Gm15682	Ensembl	chr5	-	88739246	88739729	483	intronic antisense	NM_026735	Mob1b	+	88720870	88758455
ENSMUST00000159310	6.08795	1.66275	9.27314	0.00232587	0.524859	up	15	8	0	0	0	0	3.30661	2.44625	0.0597462	0.0597462	0.0597462	0.0597462	Hmga2	Ensembl	chr10	-	120470289	120476292	3389	exon sense-overlapping	ENSMUST00000159699	Hmga2	-	120361274	120476469
BG101435	6.06479	1.6519	9.14153	0.00249922	0.549117	up	12	10	1	0	0	0	3.02219	2.71192	0.556593	0.0597462	0.0597462	0.0597462	TUname63566	Genbank	chr9	+	97278737	97292646	470	intergenic
ENSMUST00000139148	6.01649	1.65405	9.03531	0.00264867	0.565175	up	9	2	14	0	0	0	2.66757	1.10044	2.81586	0.0597462	0.0597462	0.0597462	Angptl2	Ensembl	chr2	+	33216097	33230124	2306	exon sense-overlapping	NM_011923	Angptl2	+	33215960	33247714
AK041938	5.95412	1.57151	8.35283	0.00385153	0.690037	up	19	0	2	0	0	0	3.6153	0.0597462	0.925468	0.0597462	0.0597462	0.0597462	TUname26401	Genbank	chr8	+	25831099	25833492	2393	natural antisense	ENSMUST00000166078	Ash2l	-	25816869	25840082
AK079905	5.81806	1.49864	7.64175	0.0057041	0.742408	up	3	15	2	0	0	0	1.49196	3.21827	0.925468	0.0597462	0.0597462	0.0597462	TUname36653	Genbank	chr10	-	12379847	12380335	488	intergenic
ENSMUST00000181732	5.8103	1.5087	7.67378	0.00560372	0.742408	up	11	0	10	0	0	0	2.91339	0.0597462	2.41342	0.0597462	0.0597462	0.0597462	Gm26822	Ensembl	chr16	+	10827926	10833507	3374	intergenic
AK048868	5.79038	1.51668	7.67054	0.00561378	0.742408	up	0	9	13	0	0	0	0.0597462	2.58519	2.72528	0.0597462	0.0597462	0.0597462	TUname19207	Genbank	chr15	-	83258862	83261068	2203	intergenic
TCONS_00010952	5.78343	1.48338	7.49365	0.00619255	0.761908	up	5	10	5	0	0	0	1.99747	2.71192	1.67121	0.0597462	0.0597462	0.0597462	XLOC_008463	Alexander et al 2013	chr15	-	41265048	41300131	642	intergenic
AK158515	5.77329	1.49394	7.5236	0.00609046	0.758094	up	6	4	11	0	0	0	2.19633	1.69872	2.52504	0.0597462	0.0597462	0.0597462	TUname32251	Genbank	chr10	-	60276127	60277589	1463	bidirectional	uc007fen.2	Psap	+	60277627	60302600
TCONS_00006942	5.76061	1.47466	7.40387	0.00650925	0.771289	up	0	15	5	0	0	0	0.0597462	3.21827	1.67121	0.0597462	0.0597462	0.0597462	XLOC_005758	Alexander et al 2013	chr12	-	98904604	98905771	437	intergenic
ENSMUST00000088183	5.74118	1.44853	7.23636	0.0071451	0.809098	up	12	2	5	0	0	0	3.02219	1.10044	1.67121	0.0597462	0.0597462	0.0597462	Gm5940	Ensembl	chrX	+	80456736	80458551	1815	intergenic
ENSMUST00000128707	5.71787	1.42337	7.06977	0.00784052	0.821144	up	7	11	0	0	0	0	2.37108	2.8284	0.0597462	0.0597462	0.0597462	0.0597462	Smarce1	Ensembl	chr11	-	99219708	99230413	456	exon sense-overlapping	uc011yej.1	Smarce1	-	99219219	99231017
AK089896	5.70218	1.4333	7.08418	0.00777772	0.81867	up	7	6	6	0	0	0	2.37108	2.12037	1.85333	0.0597462	0.0597462	0.0597462	TUname27157	Genbank	chr17	+	16074982	16077739	2755	intergenic
AK021074	5.70082	1.48015	7.30718	0.00686888	0.790694	up	0	3	19	0	0	0	0.0597462	1.43038	3.19911	0.0597462	0.0597462	0.0597462	TUname35487	Genbank	chr11	-	102319788	102320243	458	intergenic
AK132701	5.68472	1.45889	7.17257	0.00740364	0.813261	up	0	6	15	0	0	0	0.0597462	2.12037	2.90109	0.0597462	0.0597462	0.0597462	TUname33031	Genbank	chr2	+	121810443	121811434	992	intergenic
AK153785	5.68182	1.40861	6.93113	0.00847188	0.828985	up	6	10	2	0	0	0	2.19633	2.71192	0.925468	0.0597462	0.0597462	0.0597462	TUname8723	Genbank	chr13	+	34119700	34122465	1530	intergenic
uc007dua.1	5.6708	1.42053	6.96347	0.00832007	0.828203	up	7	4	8	0	0	0	2.37108	1.69872	2.16039	0.0597462	0.0597462	0.0597462	AK158658	UCSC_knowngene	chr1	-	176430110	176527269	955	intergenic
ENSMUST00000160205	5.65111	1.39673	6.81754	0.00902775	0.830383	up	3	12	3	0	0	0	1.49196	2.93618	1.21897	0.0597462	0.0597462	0.0597462	Wwox	Ensembl	chr8	+	114608435	114706324	432	exon sense-overlapping	ENSMUST00000109108	Wwox	+	114439694	114875238
AK155586	5.62545	1.41988	6.87237	0.00875492	0.830383	up	1	5	14	0	0	0	0.707016	1.9249	2.81586	0.0597462	0.0597462	0.0597462	TUname54663	Genbank	chr1	-	32967483	32972490	5007	intergenic
AK028473	5.60787	1.41252	6.80531	0.0090898	0.830383	up	4	0	16	0	0	0	1.76674	0.0597462	2.98156	0.0597462	0.0597462	0.0597462	TUname6366	Genbank	chr12	-	107463268	107484128	3253	intergenic
ENSMUST00000126752	5.59564	1.37433	6.61075	0.0101376	0.830383	up	5	6	7	0	0	0	1.99747	2.12037	2.01501	0.0597462	0.0597462	0.0597462	Fam161b	Ensembl	chr12	-	84348358	84354855	686	exon sense-overlapping	ENSMUST00000065536	Fam161b	-	84345308	84361833
TCONS_00013375	5.58846	1.42166	6.80917	0.00907015	0.830383	up	0	0	21	0	0	0	0.0597462	0.0597462	3.32783	0.0597462	0.0597462	0.0597462	XLOC_010269	Alexander et al 2013	chr17	+	50339129	50375836	458	intergenic
ENSMUST00000121305	5.56083	1.32396	6.32057	0.0119357	0.830383	up	8	8	0	0	0	0	2.52693	2.44625	0.0597462	0.0597462	0.0597462	0.0597462	Gm11472	Ensembl	chr2	-	167087183	167087739	556	intergenic
NR_028023	5.54992	1.3387	6.36679	0.0116288	0.830383	up	6	6	5	0	0	0	2.19633	2.12037	1.67121	0.0597462	0.0597462	0.0597462	Gm4566	RefSeq	chr17	-	71333200	71341804	532	intergenic
TCONS_00000108	5.53997	1.37038	6.48973	0.0108511	0.830383	up	4	0	15	0	0	0	1.76674	0.0597462	2.90109	0.0597462	0.0597462	0.0597462	XLOC_000353	Alexander et al 2013	chr1	+	93168454	93215373	5159	intergenic
AK161420	5.52188	1.30978	6.18781	0.0128646	0.830383	up	4	11	1	0	0	0	1.76674	2.8284	0.556593	0.0597462	0.0597462	0.0597462	TUname14467	Genbank	chr13	+	64152580	64154596	2020	natural antisense	ENSMUST00000117241	Zfp367	-	64140467	64153202
ENSMUST00000153817	5.51643	1.30792	6.16996	0.0129951	0.830383	up	3	12	1	0	0	0	1.49196	2.93618	0.556593	0.0597462	0.0597462	0.0597462	Gm12976	Ensembl	chr4	+	129261964	129265010	412	bidirectional	uc008uwo.1	C77080	-	129219577	129261404
ENSMUST00000137373	5.51511	1.30675	6.16228	0.0130516	0.830383	up	6	8	2	0	0	0	2.19633	2.44625	0.925468	0.0597462	0.0597462	0.0597462	Gm16174	Ensembl	chr7	+	19816552	19818625	402	intronic antisense	NM_033601	Bcl3	-	19808461	19822755
AK156210	5.51501	1.32544	6.24497	0.0124559	0.830383	up	6	4	7	0	0	0	2.19633	1.69872	2.01501	0.0597462	0.0597462	0.0597462	TUname54077	Genbank	chr10	-	24359531	24361805	2280	intergenic
TCONS_00027432	5.48205	1.31444	6.13848	0.0132284	0.830383	up	0	10	7	0	0	0	0.0597462	2.71192	2.01501	0.0597462	0.0597462	0.0597462	XLOC_020845	Alexander et al 2013	chr6	-	115536641	115538605	387	intergenic
AK086964	5.45961	1.28531	5.971	0.0145444	0.830383	up	9	1	6	0	0	0	2.66757	0.671968	1.85333	0.0597462	0.0597462	0.0597462	TUname23700	Genbank	chr1	-	86521159	86522365	1209	intergenic
ENSMUST00000145576	5.44963	1.28276	5.94308	0.0147766	0.830383	up	4	7	5	0	0	0	1.76674	2.29249	1.67121	0.0597462	0.0597462	0.0597462	Gm14902	Ensembl	chrX	+	100741092	100749421	1007	intergenic
NR_024257	5.44736	1.33757	6.17905	0.0129285	0.830383	up	0	0	19	0	0	0	0.0597462	0.0597462	3.19911	0.0597462	0.0597462	0.0597462	4930412O13Rik	RefSeq	chr2	+	9881245	9886767	4066	natural antisense	ENSMUST00000114915	9230102O04Rik	-	9883041	9883993
CJ083178	5.43987	1.25753	5.83959	0.0156709	0.830383	up	12	0	3	0	0	0	3.02219	0.0597462	1.21897	0.0597462	0.0597462	0.0597462	TUname63931	Genbank	chr14	-	72098164	72603149	383	exon sense-overlapping	ENSMUST00000162825	Fndc3a	-	72539529	72602962
AK089603	5.42668	1.25546	5.81181	0.0159204	0.830383	up	0	15	0	0	0	0	0.0597462	3.21827	0.0597462	0.0597462	0.0597462	0.0597462	TUname60552	Genbank	chr9	-	106382131	106387579	4971	intergenic
ENSMUST00000145176	5.42386	1.25305	5.79923	0.0160346	0.830383	up	6	7	2	0	0	0	2.19633	2.29249	0.925468	0.0597462	0.0597462	0.0597462	2610203C22Rik	Ensembl	chr1	-	9563504	9631137	662	natural antisense	NM_175236	Adhfe1	+	9548045	9577968
ENSMUST00000166507	5.41804	1.27109	5.84558	0.0156177	0.830383	up	5	4	7	0	0	0	1.99747	1.69872	2.01501	0.0597462	0.0597462	0.0597462	Gm17098	Ensembl	chr9	+	66834698	66835534	628	natural antisense	NM_026674	Aph1c	-	66814993	66834706
AK149004	5.41661	1.26991	5.8392	0.0156743	0.830383	up	8	0	8	0	0	0	2.52693	0.0597462	2.16039	0.0597462	0.0597462	0.0597462	TUname19403	Genbank	chr10	-	95116378	95117731	1354	intergenic
ENSMUST00000141976	5.41078	1.26805	5.82355	0.0158144	0.830383	up	7	1	8	0	0	0	2.37108	0.671968	2.16039	0.0597462	0.0597462	0.0597462	Ccdc64	Ensembl	chr5	-	115649266	115652986	595	exon sense-overlapping	NM_001080808	Ccdc64	-	115649285	115731559
TCONS_00016050	5.40932	1.24684	5.75546	0.0164389	0.830383	up	10	1	4	0	0	0	2.79571	0.671968	1.46274	0.0597462	0.0597462	0.0597462	XLOC_012086	Alexander et al 2013	chr19	+	61147412	61186058	681	intron sense-overlapping	ENSMUST00000092094	Gm6020	+	61183889	61183955
AK075622	5.39318	1.26246	5.77725	0.0162364	0.830383	up	4	4	8	0	0	0	1.76674	1.69872	2.16039	0.0597462	0.0597462	0.0597462	TUname12371	Genbank	chr12	+	73284519	73285996	1478	natural antisense	uc007nwf.1	Trmt5	-	73280409	73285275
AK017089	5.39318	1.26246	5.77725	0.0162364	0.830383	up	4	4	8	0	0	0	1.76674	1.69872	2.16039	0.0597462	0.0597462	0.0597462	TUname31586	Genbank	chr13	-	36582090	36583526	1437	intergenic
NR_040539	5.38437	1.21716	5.62167	0.0177412	0.830383	up	9	5	0	0	0	0	2.66757	1.9249	0.0597462	0.0597462	0.0597462	0.0597462	2410007B07Rik	RefSeq	chr3	-	75647440	75655731	1031	intergenic
ENSMUST00000180488	5.37121	1.29348	5.85744	0.0155128	0.830383	up	0	0	18	0	0	0	0.0597462	0.0597462	3.13018	0.0597462	0.0597462	0.0597462	B230323A14Rik	Ensembl	chr9	+	69758739	69830845	2864	natural antisense	NM_022378	Foxb1	-	69757709	69760940
ENSMUST00000145085	5.36016	1.20944	5.55841	0.0183937	0.830383	up	5	9	0	0	0	0	1.99747	2.58519	0.0597462	0.0597462	0.0597462	0.0597462	Gm16741	Ensembl	chr14	+	7749944	7775528	1818	intergenic
ENSMUST00000136810	5.35554	1.22979	5.61478	0.0178111	0.830383	up	1	10	4	0	0	0	0.707016	2.71192	1.46274	0.0597462	0.0597462	0.0597462	Ddc	Ensembl	chr11	-	11814102	11822921	964	exon sense-overlapping	NM_016672	Ddc	-	11814100	11890408
ENSMUST00000181758	5.32941	1.1998	5.47914	0.0192462	0.830383	up	0	14	0	0	0	0	0.0597462	3.13023	0.0597462	0.0597462	0.0597462	0.0597462	2010300F17Rik	Ensembl	chr11	-	96712981	96747436	2493	natural antisense	NM_001033186	Skap1	+	96464590	96759622
uc029uww.1	5.31862	1.19413	5.44362	0.0196415	0.830383	up	8	3	3	0	0	0	2.52693	1.43038	1.21897	0.0597462	0.0597462	0.0597462	AK148321	UCSC_knowngene	chr4	+	89383196	89518621	1893	intergenic
ENSMUST00000145836	5.31082	1.19095	5.42114	0.0198959	0.830383	up	10	0	4	0	0	0	2.79571	0.0597462	1.46274	0.0597462	0.0597462	0.0597462	Tmem53	Ensembl	chr4	+	117265370	117268582	1298	exon sense-overlapping	ENSMUST00000106434	Tmem53	+	117252041	117268582
CJ064146	5.3032	1.16553	5.3285	0.0209811	0.830383	up	12	1	0	0	0	0	3.02219	0.671968	0.0597462	0.0597462	0.0597462	0.0597462	TUname63923	Genbank	chr12	-	10230359	10356881	654	intergenic
ENSMUST00000117256	5.29187	1.18516	5.37335	0.0204483	0.830383	up	7	3	4	0	0	0	2.37108	1.43038	1.46274	0.0597462	0.0597462	0.0597462	Gm12306	Ensembl	chr11	+	69074489	69074660	171	intergenic
ENSMUST00000131353	5.2859	1.20474	5.42531	0.0198485	0.830383	up	6	0	9	0	0	0	2.19633	0.0597462	2.29245	0.0597462	0.0597462	0.0597462	Rasa4	Ensembl	chr5	+	136083998	136093447	722	exon sense-overlapping	NM_001039103	Rasa4	+	136083915	136111860
ENSMUST00000176614	5.27757	1.15767	5.26404	0.0217721	0.830383	up	8	5	0	0	0	0	2.52693	1.9249	0.0597462	0.0597462	0.0597462	0.0597462	Neurl4	Ensembl	chr11	+	69901071	69903399	469	exon sense-overlapping	ENSMUST00000108617	Neurl4	+	69901815	69913515
TCONS_00000485	5.27601	1.15638	5.25731	0.0218564	0.830383	up	11	1	1	0	0	0	2.91339	0.671968	0.556593	0.0597462	0.0597462	0.0597462	XLOC_001255	Alexander et al 2013	chr1	-	151074546	151075457	399	intergenic
AK133131	5.26467	1.17619	5.3029	0.0212916	0.830383	up	6	3	5	0	0	0	2.19633	1.43038	1.67121	0.0597462	0.0597462	0.0597462	TUname31194	Genbank	chr2	+	84715760	84717755	1991	bidirectional	NM_144887	Zdhhc5	-	84687919	84715164
ENSMUST00000123233	5.2582	1.17426	5.28692	0.0214878	0.830383	up	5	4	5	0	0	0	1.99747	1.69872	1.67121	0.0597462	0.0597462	0.0597462	Ago3	Ensembl	chr4	-	126407695	126429541	613	exon sense-overlapping	uc008uti.2	Eif2c3	-	126375677	126429542
NR_040353	5.25009	1.17107	5.26429	0.021769	0.830383	up	7	1	6	0	0	0	2.37108	0.671968	1.85333	0.0597462	0.0597462	0.0597462	E030013I19Rik	RefSeq	chr2	+	12301245	12312315	2773	natural antisense	NM_001001309	Itga8	-	12106659	12301920
ENSMUST00000180989	5.24836	1.14723	5.18594	0.022772	0.830383	up	10	1	2	0	0	0	2.79571	0.671968	0.925468	0.0597462	0.0597462	0.0597462	Gm26626	Ensembl	chr16	+	92612813	92620105	796	natural antisense	NM_001111023	Runx1	-	92601465	92697328
ENSMUST00000153443	5.2475	1.19337	5.33049	0.0209571	0.830383	up	0	6	9	0	0	0	0.0597462	2.12037	2.29245	0.0597462	0.0597462	0.0597462	Gm17029	Ensembl	chr4	+	148960359	148966998	2758	natural antisense	NM_019781	Pex14	-	148960534	149099812
ENSMUST00000180632	5.2288	1.16402	5.20959	0.0224643	0.830383	up	7	0	7	0	0	0	2.37108	0.0597462	2.01501	0.0597462	0.0597462	0.0597462	4930532G15Rik	Ensembl	chr1	-	185359460	185362865	699	bidirectional	NM_029735	Eprs	+	185363094	185428355
ENSMUST00000155840	5.22852	1.14134	5.13739	0.0234175	0.830383	up	7	4	2	0	0	0	2.37108	1.69872	0.925468	0.0597462	0.0597462	0.0597462	Nkiras2	Ensembl	chr11	+	100622947	100626586	988	exon sense-overlapping	NM_028024	Nkiras2	+	100622954	100627602
ENSMUST00000160121	5.22513	1.14196	5.13478	0.0234528	0.830383	up	0	13	0	0	0	0	0.0597462	3.03647	0.0597462	0.0597462	0.0597462	0.0597462	Adck3	Ensembl	chr1	-	180179141	180195972	528	exon sense-overlapping	ENSMUST00000161746	Adck3	-	180182172	180195902
ENSMUST00000121328	5.20635	1.20073	5.28997	0.0214502	0.830383	up	0	0	16	0	0	0	0.0597462	0.0597462	2.98156	0.0597462	0.0597462	0.0597462	Gm15826	Ensembl	chr1	+	66951828	66953469	1384	intergenic
uc029uds.1	5.20338	1.13478	5.07939	0.0242136	0.830383	up	0	12	1	0	0	0	0.0597462	2.93618	0.556593	0.0597462	0.0597462	0.0597462	Mir5111	UCSC_knowngene	chr2	-	104636195	104636215	20	intronic antisense	NM_145529	Cstf3	+	104590483	104665425
ENSMUST00000097731	5.20338	1.13478	5.07939	0.0242136	0.830383	up	0	12	1	0	0	0	0.0597462	2.93618	0.556593	0.0597462	0.0597462	0.0597462	Ttll10	Ensembl	chr4	-	156042303	156059344	2177	exon sense-overlapping	NM_029264	Ttll10	-	156034836	156050817
ENSMUST00000181152	5.20052	1.15504	5.13873	0.0233995	0.830383	up	6	0	8	0	0	0	2.19633	0.0597462	2.16039	0.0597462	0.0597462	0.0597462	Gm26563	Ensembl	chr11	-	80018479	80029868	1931	intronic antisense	NM_199196	Suz12	+	79993105	80034123
AK039990	5.19685	1.10577	4.97602	0.0257027	0.830383	up	12	0	0	0	0	0	3.02219	0.0597462	0.0597462	0.0597462	0.0597462	0.0597462	TUname58714	Genbank	chr17	+	57078589	57079546	958	bidirectional	NM_153551	Dennd1c	-	57066054	57078510
ENSMUST00000158733	5.19685	1.10577	4.97602	0.0257027	0.830383	up	12	0	0	0	0	0	3.02219	0.0597462	0.0597462	0.0597462	0.0597462	0.0597462	Gm25491	Ensembl	chr1	+	13932377	13932685	308	intergenic
ENSMUST00000111462	5.19685	1.10577	4.97602	0.0257027	0.830383	up	12	0	0	0	0	0	3.02219	0.0597462	0.0597462	0.0597462	0.0597462	0.0597462	Gm11065	Ensembl	chr6	+	70295176	70295406	228	intergenic
ENSMUST00000118534	5.19685	1.10577	4.97602	0.0257027	0.830383	up	12	0	0	0	0	0	3.02219	0.0597462	0.0597462	0.0597462	0.0597462	0.0597462	Gm16032	Ensembl	chr11	-	74732202	74732370	168	intergenic
ENSMUST00000116395	5.19685	1.10577	4.97602	0.0257027	0.830383	up	12	0	0	0	0	0	3.02219	0.0597462	0.0597462	0.0597462	0.0597462	0.0597462	Gm14756	Ensembl	chrX	-	74872195	74872435	240	intergenic
ENSMUST00000160336	5.17963	1.12629	5.01706	0.0251005	0.830383	up	3	7	3	0	0	0	1.49196	2.29249	1.21897	0.0597462	0.0597462	0.0597462	Fancc	Ensembl	chr13	-	63312495	63325018	881	exon sense-overlapping	NM_001042673	Fancc	-	63304708	63431745
AK132089	5.17107	1.12303	4.99396	0.0254377	0.830383	up	5	4	4	0	0	0	1.99747	1.69872	1.46274	0.0597462	0.0597462	0.0597462	TUname51709	Genbank	chr11	+	86596399	86598063	1664	intronic antisense	NM_029478	Vmp1	-	86583864	86683822
TCONS_00032236	5.16417	1.12107	4.9777	0.0256778	0.830383	up	4	5	4	0	0	0	1.76674	1.9249	1.46274	0.0597462	0.0597462	0.0597462	XLOC_023636	Alexander et al 2013	chr8	+	35748548	35755718	457	intergenic
TCONS_00000027	5.16115	1.1657	5.11361	0.0237406	0.830383	up	0	2	13	0	0	0	0.0597462	1.10044	2.72528	0.0597462	0.0597462	0.0597462	XLOC_000081	Alexander et al 2013	chr1	+	36718851	36725012	1681	intergenic
BC010677_3	5.15979	1.14347	5.04227	0.0247378	0.830383	up	0	6	8	0	0	0	0.0597462	2.12037	2.16039	0.0597462	0.0597462	0.0597462
ENSMUST00000173761	5.15362	1.09242	4.87139	0.0273074	0.830383	up	9	2	1	0	0	0	2.66757	1.10044	0.556593	0.0597462	0.0597462	0.0597462	L3mbtl2	Ensembl	chr15	+	81686021	81687187	548	natural antisense	NM_001164320	Chadl	-	81686166	81697287
uc009eno.1	5.14331	1.11518	4.9289	0.0264129	0.830383	up	1	8	4	0	0	0	0.707016	2.44625	1.46274	0.0597462	0.0597462	0.0597462	AK169220	UCSC_knowngene	chr6	+	138443972	138461615	2345	intronic antisense	NM_207222	Lmo3	-	138364480	138581968
AK015175	5.14249	1.13708	4.99653	0.0254	0.830383	up	4	0	10	0	0	0	1.76674	0.0597462	2.41342	0.0597462	0.0597462	0.0597462	TUname12964	Genbank	chr8	-	116181450	116187369	2364	intergenic
AK077245	5.14126	1.08975	4.84564	0.027718	0.830383	up	4	8	0	0	0	0	1.76674	2.44625	0.0597462	0.0597462	0.0597462	0.0597462	TUname11256	Genbank	chr8	+	128654312	128656757	2446	intergenic
uc009apf.1	5.1378	1.08707	4.83178	0.0279416	0.830383	up	10	0	2	0	0	0	2.79571	0.0597462	0.925468	0.0597462	0.0597462	0.0597462	AK132872	UCSC_knowngene	chr5	+	149144262	149153540	1667	intergenic
ENSMUST00000133001	5.1378	1.08707	4.83178	0.0279416	0.830383	up	10	0	2	0	0	0	2.79571	0.0597462	0.925468	0.0597462	0.0597462	0.0597462	Gm6483	Ensembl	chr8	+	19682269	19697095	4562	exon sense-overlapping	ENSMUST00000127799	Gm6483	+	19682269	19697482
ENSMUST00000183118	5.1363	1.11321	4.91262	0.026663	0.830383	up	0	9	4	0	0	0	0.0597462	2.58519	1.46274	0.0597462	0.0597462	0.0597462	Samd15	Ensembl	chr12	+	87199766	87208858	449	exon sense-overlapping	ENSMUST00000182869	Samd15	+	87200542	87213541
AK051788	5.12707	1.08575	4.81294	0.0282486	0.830383	up	2	10	0	0	0	0	1.15223	2.71192	0.0597462	0.0597462	0.0597462	0.0597462	TUname37169	Genbank	chr18	+	65579150	65580147	999	intergenic
AK138392	5.11639	2.42532	15.3419	8.97683e-05	0.0612122	up	0	6	49	0	1	0	0.0597462	2.12037	4.462	0.0597462	0.621297	0.0597462	TUname12358	Genbank	chr12	+	45494914	45495781	869	intergenic
ENSMUST00000133299	5.11276	1.08175	4.7802	0.0287905	0.830383	up	0	12	0	0	0	0	0.0597462	2.93618	0.0597462	0.0597462	0.0597462	0.0597462	Gm16150	Ensembl	chr1	+	38239699	38246666	673	intronic antisense	uc007asu.1	Aff3	-	38209552	38627244
ENSMUST00000155758	5.11276	1.08175	4.7802	0.0287905	0.830383	up	0	12	0	0	0	0	0.0597462	2.93618	0.0597462	0.0597462	0.0597462	0.0597462	Gm15055	Ensembl	chr6	+	52103002	52112188	408	intergenic
AK015734	5.11276	1.08175	4.7802	0.0287905	0.830383	up	0	12	0	0	0	0	0.0597462	2.93618	0.0597462	0.0597462	0.0597462	0.0597462	TUname26772	Genbank	chr8	+	115770860	115771963	1103	intergenic
ENSMUST00000150705	5.10922	1.07907	4.76627	0.0290245	0.830383	up	6	4	2	0	0	0	2.19633	1.69872	0.925468	0.0597462	0.0597462	0.0597462	Gm13703	Ensembl	chr2	+	73357267	73364333	449	natural antisense	NM_001276444	Gpr155	-	73341505	73386480
uc029sds.1	5.07471	1.04141	4.59743	0.0320218	0.830383	up	11	0	0	0	0	0	2.91339	0.0597462	0.0597462	0.0597462	0.0597462	0.0597462	AK172267	UCSC_knowngene	chr13	-	120034604	120052194	1733	exon sense-overlapping	ENSMUST00000178618	Gm21188	-	120034758	120035331
ENSMUST00000154920	5.07471	1.04141	4.59743	0.0320218	0.830383	up	11	0	0	0	0	0	2.91339	0.0597462	0.0597462	0.0597462	0.0597462	0.0597462	Ophn1	Ensembl	chrX	-	98563568	98578435	330	exon sense-overlapping	ENSMUST00000147529	Ophn1	-	98558256	98578489
NR_040360	5.0718	1.09228	4.75526	0.0292108	0.830383	up	4	1	8	0	0	0	1.76674	0.671968	2.16039	0.0597462	0.0597462	0.0597462	Gm19277	RefSeq	chr15	-	85149253	85156132	1165	intergenic
NR_028589	5.0718	1.09228	4.75526	0.0292108	0.830383	up	4	1	8	0	0	0	1.76674	0.671968	2.16039	0.0597462	0.0597462	0.0597462	Gm14005	RefSeq	chr2	-	128298662	128429351	2797	intergenic
TCONS_00032483	5.06727	1.03937	4.58074	0.0323352	0.830383	up	10	1	0	0	0	0	2.79571	0.671968	0.0597462	0.0597462	0.0597462	0.0597462	XLOC_024437	Alexander et al 2013	chr8	-	71831927	71843913	169	intergenic
AK153665	5.06727	1.03937	4.58074	0.0323352	0.830383	up	10	1	0	0	0	0	2.79571	0.671968	0.0597462	0.0597462	0.0597462	0.0597462	TUname45619	Genbank	chr6	-	24739632	24742729	3121	natural antisense	NM_028920	Hyal6	+	24733244	24745452
ENSMUST00000183350	5.06542	1.06707	4.66771	0.0307368	0.830383	up	0	10	2	0	0	0	0.0597462	2.71192	0.925468	0.0597462	0.0597462	0.0597462	Mlip	Ensembl	chr9	-	77346431	77352969	2408	exon sense-overlapping	ENSMUST00000185144	Mlip	-	77102080	77347863
AK020755	5.06542	1.06707	4.66771	0.0307368	0.830383	up	0	10	2	0	0	0	0.0597462	2.71192	0.925468	0.0597462	0.0597462	0.0597462	TUname13732	Genbank	chr11	+	120932949	120933730	782	bidirectional	NM_027745	Ccdc57	-	120826541	120932872
TCONS_00016051	5.06542	1.06707	4.66771	0.0307368	0.830383	up	0	10	2	0	0	0	0.0597462	2.71192	0.925468	0.0597462	0.0597462	0.0597462	XLOC_012087	Alexander et al 2013	chr19	+	61151901	61179296	196	intronic antisense	NM_001177513	Gm7102	-	61174685	61176309
AK038907	5.04975	1.0864	4.70651	0.0300504	0.830383	up	1	4	8	0	0	0	0.707016	1.69872	2.16039	0.0597462	0.0597462	0.0597462	TUname10711	Genbank	chr7	-	122167028	122168044	1017	natural antisense	uc009joo.2	Plk1	+	122133040	122169875
AK190912	5.04684	1.06037	4.62066	0.0315909	0.830383	up	4	4	4	0	0	0	1.76674	1.69872	1.46274	0.0597462	0.0597462	0.0597462	TUname63316	Genbank	chr5	+	25582629	26044936	407	intronic antisense	ENSMUST00000178487	Gm21698	-	25984149	25987448
ENSMUST00000144272	5.04497	1.05902	4.61359	0.0317214	0.830383	up	7	0	5	0	0	0	2.37108	0.0597462	1.67121	0.0597462	0.0597462	0.0597462	Klhdc10	Ensembl	chr6	+	30417035	30450814	1387	exon sense-overlapping	NM_029742	Klhdc10	+	30401908	30455174
ENSMUST00000138752	5.04474	1.03325	4.53061	0.0332957	0.830383	up	7	4	0	0	0	0	2.37108	1.69872	0.0597462	0.0597462	0.0597462	0.0597462	Hdc	Ensembl	chr2	-	126600233	126618661	4518	exon sense-overlapping	ENSMUST00000028838	Hdc	-	126593666	126618678
TCONS_00006922	5.0353	1.02982	4.50664	0.0337654	0.830383	up	9	1	1	0	0	0	2.66757	0.671968	0.556593	0.0597462	0.0597462	0.0597462	XLOC_005666	Alexander et al 2013	chr12	-	77044979	77047107	681	intergenic
ENSMUST00000145185	5.02551	1.0792	4.65074	0.031042	0.830383	up	1	3	9	0	0	0	0.707016	1.43038	2.29245	0.0597462	0.0597462	0.0597462	5830418P13Rik	Ensembl	chr9	+	103425160	103427781	548	natural antisense	NM_001002896	Bfsp2	-	103424923	103480328
ENSMUST00000177789	5.02189	1.02713	4.48205	0.0342545	0.830383	up	4	7	0	0	0	0	1.76674	2.29249	0.0597462	0.0597462	0.0597462	0.0597462	Pappa2	Ensembl	chr1	-	158958075	158960381	545	intergenic
ENSMUST00000137819	5.02002	1.10114	4.71076	0.0299763	0.830383	up	0	0	14	0	0	0	0.0597462	0.0597462	2.81586	0.0597462	0.0597462	0.0597462	Slc6a4	Ensembl	chr11	+	77018176	77022346	2149	exon sense-overlapping	ENSMUST00000108402	Slc6a4	+	76998602	77032339
ENSMUST00000160451	5.02002	1.10114	4.71076	0.0299763	0.830383	up	0	0	14	0	0	0	0.0597462	0.0597462	2.81586	0.0597462	0.0597462	0.0597462	Mybl1	Ensembl	chr1	-	9678271	9683452	695	exon sense-overlapping	ENSMUST00000115468	Mybl1	-	9669536	9700024
uc008hln.1	5.01799	1.07724	4.63444	0.0313383	0.830383	up	0	4	9	0	0	0	0.0597462	1.69872	2.29245	0.0597462	0.0597462	0.0597462	AK040231	UCSC_knowngene	chr19	-	41009102	41011703	2601	intergenic
uc029stf.1	5.01665	1.05238	4.55462	0.0328319	0.830383	up	0	8	4	0	0	0	0.0597462	2.44625	1.46274	0.0597462	0.0597462	0.0597462	DQ703140	UCSC_knowngene	chr15	-	78665527	78665560	33	intergenic
ENSMUST00000133619	5.00849	1.07396	4.61116	0.0317665	0.830383	up	2	1	10	0	0	0	1.15223	0.671968	2.41342	0.0597462	0.0597462	0.0597462	Rp2h	Ensembl	chrX	+	20364618	20405630	1615	exon sense-overlapping	NM_133669	Rp2h	+	20364607	20400349
AK087713	5.00645	1.02305	4.45605	0.0347798	0.830383	up	2	9	0	0	0	0	1.15223	2.58519	0.0597462	0.0597462	0.0597462	0.0597462	TUname20016	Genbank	chrX	-	17365289	17366619	1331	intergenic
TCONS_00027431	5.00453	1.02166	4.45134	0.0348759	0.830383	up	5	5	1	0	0	0	1.99747	1.9249	0.556593	0.0597462	0.0597462	0.0597462	XLOC_020844	Alexander et al 2013	chr6	-	115526418	115531425	1405	intergenic
ENSMUST00000122035	4.99675	1.01962	4.43829	0.0351434	0.830383	up	4	6	1	0	0	0	1.76674	2.12037	0.556593	0.0597462	0.0597462	0.0597462	Mkrn1-ps1	Ensembl	chr5	-	88838008	88839402	1394	intergenic
ENSMUST00000119117	4.99327	1.07004	4.5785	0.0323776	0.830383	up	0	3	10	0	0	0	0.0597462	1.43038	2.41342	0.0597462	0.0597462	0.0597462	Gm14404	Ensembl	chr2	-	177419901	177422936	1660	intergenic
ENSMUST00000159538	4.9917	1.04503	4.49787	0.0339391	0.830383	up	0	7	5	0	0	0	0.0597462	2.29249	1.67121	0.0597462	0.0597462	0.0597462	Mcoln1	Ensembl	chr8	+	3511595	3512807	373	exon sense-overlapping	NM_053177	Mcoln1	+	3500518	3515231
ENSMUST00000182537	4.99089	1.01898	4.42997	0.0353151	0.830383	up	0	11	0	0	0	0	0.0597462	2.8284	0.0597462	0.0597462	0.0597462	0.0597462	Dleu2	Ensembl	chr14	-	61643341	61682313	318	intergenic
ENSMUST00000183014	4.98362	1.06676	4.55514	0.0328219	0.830383	up	2	0	11	0	0	0	1.15223	0.0597462	2.52504	0.0597462	0.0597462	0.0597462	Ccnd3	Ensembl	chr17	+	47505239	47579058	552	exon sense-overlapping	NM_001081635	Ccnd3	+	47505050	47599688
uc029xlh.1	4.97125	1.01211	4.39429	0.0360615	0.830383	up	4	5	2	0	0	0	1.76674	1.9249	0.925468	0.0597462	0.0597462	0.0597462	JA187517	UCSC_knowngene	chrX	+	83956652	83956673	21	intron sense-overlapping	NM_007868	Dmd	+	82948869	85205050
ENSMUST00000183181	4.96531	1.01147	4.38595	0.0362383	0.830383	up	0	10	1	0	0	0	0.0597462	2.71192	0.556593	0.0597462	0.0597462	0.0597462	Rbm25	Ensembl	chr12	+	83674852	83677898	609	exon sense-overlapping	NM_027349	Rbm25	+	83632233	83683123
ENSMUST00000149505	4.95055	1.0576	4.48261	0.0342434	0.830383	up	1	0	12	0	0	0	0.707016	0.0597462	2.62863	0.0597462	0.0597462	0.0597462	Tfap2d	Ensembl	chr1	+	19107180	19148367	745	exon sense-overlapping	NM_153154	Tfap2d	+	19103021	19166332
AK052925	4.94857	1.03233	4.40058	0.0359286	0.830383	up	1	4	7	0	0	0	0.707016	1.69872	2.01501	0.0597462	0.0597462	0.0597462	TUname19894	Genbank	chr11	+	88215347	88216012	667	intergenic
NR_045719	4.94655	1.03097	4.39338	0.0360807	0.830383	up	4	0	8	0	0	0	1.76674	0.0597462	2.16039	0.0597462	0.0597462	0.0597462	AU022793	RefSeq	chr15	+	39962648	39967515	1868	intergenic
AK084399	4.94051	0.974194	4.30067	0.0380993	0.830383	up	10	0	0	0	0	0	2.79571	0.0597462	0.0597462	0.0597462	0.0597462	0.0597462	TUname47354	Genbank	chr16	-	90890813	90891851	1042	intronic antisense	NM_027627	Eva1c	+	90830858	90904885
NR_045331	4.91681	1.04844	4.40987	0.0357335	0.830383	up	0	0	13	0	0	0	0.0597462	0.0597462	2.72528	0.0597462	0.0597462	0.0597462	Gm6307	RefSeq	chr2	+	180385603	180401802	2019	intergenic
ENSMUST00000156847	4.91596	0.967953	4.26041	0.0390126	0.830383	up	7	3	0	0	0	0	2.37108	1.43038	0.0597462	0.0597462	0.0597462	0.0597462	Mtx1	Ensembl	chr3	-	89209744	89213862	915	exon sense-overlapping	NM_001161824	Mtx1	-	89209080	89214335
TCONS_00006755	4.91453	1.02298	4.33592	0.0373183	0.830383	up	0	4	8	0	0	0	0.0597462	1.69872	2.16039	0.0597462	0.0597462	0.0597462	XLOC_005167	Alexander et al 2013	chr12	+	77782650	77786002	538	intergenic
ENSMUST00000145914	4.91093	0.995054	4.29231	0.0382872	0.830383	up	3	4	4	0	0	0	1.49196	1.69872	1.46274	0.0597462	0.0597462	0.0597462	Gm15478	Ensembl	chr5	+	67642400	67646776	2172	intronic antisense	ENSMUST00000037380	Atp8a1	-	67618139	67847432
ENSMUST00000117335	4.90886	0.993652	4.28743	0.0383973	0.830383	up	6	0	5	0	0	0	2.19633	0.0597462	1.67121	0.0597462	0.0597462	0.0597462	Gm11821	Ensembl	chr4	+	11400345	11401324	979	intergenic
AK138170	4.90886	0.993652	4.28743	0.0383973	0.830383	up	6	0	5	0	0	0	2.19633	0.0597462	1.67121	0.0597462	0.0597462	0.0597462	TUname59456	Genbank	chr6	+	128532675	128533384	711	intergenic
ENSMUST00000162570	4.9077	0.965873	4.24695	0.039323	0.830383	up	6	4	0	0	0	0	2.19633	1.69872	0.0597462	0.0597462	0.0597462	0.0597462	Abhd12b	Ensembl	chr12	+	70154141	70183347	3028	exon sense-overlapping	NM_001195033	Abhd12b	+	70154170	70183206
ENSMUST00000174872	4.9077	0.965873	4.24695	0.039323	0.830383	up	6	4	0	0	0	0	2.19633	1.69872	0.0597462	0.0597462	0.0597462	0.0597462	Angptl4	Ensembl	chr17	-	33777011	33779143	575	exon sense-overlapping	NM_020581	Angptl4	-	33774899	33781575
AK017999	4.90065	0.991615	4.27414	0.0386985	0.830383	up	5	1	5	0	0	0	1.99747	0.671968	1.67121	0.0597462	0.0597462	0.0597462	TUname24577	Genbank	chr6	+	125246404	125247472	1357	intergenic
ENSMUST00000053838	4.90001	2.22002	12.1871	0.000481364	0.209708	up	21	7	12	1	0	0	3.74795	2.29249	2.62863	0.626355	0.0597462	0.0597462	D630028G08Rik	Ensembl	chr10	+	64018582	64018947	363	intron sense-overlapping	NM_177612	Ctnna3	+	63430097	65003667
AK049024	4.89731	0.962349	4.22848	0.0397531	0.830383	up	8	1	1	0	0	0	2.52693	0.671968	0.556593	0.0597462	0.0597462	0.0597462	TUname57325	Genbank	chr15	-	75631968	75635910	2848	intergenic
uc008ybz.1	4.89108	0.961716	4.21998	0.0399528	0.830383	up	4	6	0	0	0	0	1.76674	2.12037	0.0597462	0.0597462	0.0597462	0.0597462	Thap6	UCSC_knowngene	chr5	+	91962388	91966598	1337	natural antisense	NM_001271797	Rchy1	-	91948841	91963068
AK143032	4.88626	0.988947	4.25244	0.0391959	0.830383	up	0	7	4	0	0	0	0.0597462	2.29249	1.46274	0.0597462	0.0597462	0.0597462	TUname10133	Genbank	chr3	+	90283781	90285071	1330	intergenic
TCONS_00034169	4.88626	0.988947	4.25244	0.0391959	0.830383	up	0	7	4	0	0	0	0.0597462	2.29249	1.46274	0.0597462	0.0597462	0.0597462	XLOC_025816	Alexander et al 2013	chr9	-	52020855	52049130	780	intronic antisense	NM_001104616	Rdx	+	52047149	52088738
ENSMUST00000138777	4.87774	1.01227	4.27386	0.0387049	0.830383	up	2	0	10	0	0	0	1.15223	0.0597462	2.41342	0.0597462	0.0597462	0.0597462	Mtfr1	Ensembl	chr3	+	19188273	19215703	568	exon sense-overlapping	NM_026182	Mtfr1	+	19188220	19220817
ENSMUST00000160785	4.87216	0.956113	4.1879	0.0407156	0.830383	up	5	4	1	0	0	0	1.99747	1.69872	0.556593	0.0597462	0.0597462	0.0597462	Unkl	Ensembl	chr17	+	25189463	25205734	745	exon sense-overlapping	ENSMUST00000160896	Unkl	+	25188913	25234443
ENSMUST00000136310	4.87002	0.954665	4.18286	0.0408368	0.830383	up	8	0	2	0	0	0	2.52693	0.0597462	0.925468	0.0597462	0.0597462	0.0597462	Eno1	Ensembl	chr4	+	150247564	150248629	578	exon sense-overlapping	ENSMUST00000080149	Eno1	+	150243485	150248873
TCONS_00032277	4.87002	0.954665	4.18286	0.0408368	0.830383	up	8	0	2	0	0	0	2.52693	0.0597462	0.925468	0.0597462	0.0597462	0.0597462	XLOC_023714	Alexander et al 2013	chr8	+	65049943	65063913	304	intergenic
ENSMUST00000179536	4.86122	1.00828	4.24754	0.0393093	0.830383	up	0	2	10	0	0	0	0.0597462	1.10044	2.41342	0.0597462	0.0597462	0.0597462	Gm21839	Ensembl	chr5	-	135643954	135644336	378	natural antisense	NM_146002	Rhbdd2	+	135632653	135646376
ENSMUST00000166127	4.85911	0.981438	4.20747	0.0402483	0.830383	up	0	6	5	0	0	0	0.0597462	2.12037	1.67121	0.0597462	0.0597462	0.0597462	4930431P03Rik	Ensembl	chr14	-	44955216	44961307	4237	intergenic
ENSMUST00000128894	4.85739	0.953405	4.16581	0.0412497	0.830383	up	0	10	0	0	0	0	0.0597462	2.71192	0.0597462	0.0597462	0.0597462	0.0597462	Gm15336	Ensembl	chr18	-	39246246	39302690	1571	natural antisense	ENSMUST00000155576	Arhgap26	+	38993475	39371162
AK157328	4.85739	0.953405	4.16581	0.0412497	0.830383	up	0	10	0	0	0	0	0.0597462	2.71192	0.0597462	0.0597462	0.0597462	0.0597462	TUname25285	Genbank	chr2	+	84715013	84716459	1447	natural antisense	NM_144887	Zdhhc5	-	84687919	84715164
AK156834	4.85739	0.953405	4.16581	0.0412497	0.830383	up	0	10	0	0	0	0	0.0597462	2.71192	0.0597462	0.0597462	0.0597462	0.0597462	TUname53279	Genbank	chr2	+	139785221	139786001	780	intergenic
uc029srr.1	4.85739	0.953405	4.16581	0.0412497	0.830383	up	0	10	0	0	0	0	0.0597462	2.71192	0.0597462	0.0597462	0.0597462	0.0597462	DQ551586	UCSC_knowngene	chr15	+	74638705	74638780	75	intergenic
ENSMUST00000147698	4.85739	0.953405	4.16581	0.0412497	0.830383	up	0	10	0	0	0	0	0.0597462	2.71192	0.0597462	0.0597462	0.0597462	0.0597462	Gm5958	Ensembl	chr14	-	99835517	99835814	297	intergenic
uc007fti.1	4.85739	0.953405	4.16581	0.0412497	0.830383	up	0	10	0	0	0	0	0.0597462	2.71192	0.0597462	0.0597462	0.0597462	0.0597462	DQ707749	UCSC_knowngene	chr10	+	75862134	75862164	30	intergenic
uc009dzu.1	4.84005	0.975963	4.1757	0.0410098	0.830383	up	1	4	6	0	0	0	0.707016	1.69872	1.85333	0.0597462	0.0597462	0.0597462	DQ684682	UCSC_knowngene	chr6	+	127806588	127806618	30	intergenic
DT924415	4.8359	0.946354	4.12844	0.0421702	0.830383	up	4	4	2	0	0	0	1.76674	1.69872	0.925468	0.0597462	0.0597462	0.0597462	TUname64103	Genbank	chr3	+	52402952	52403463	510	intergenic
AK007066	4.83154	0.973929	4.16227	0.0413361	0.830383	up	0	5	6	0	0	0	0.0597462	1.9249	1.85333	0.0597462	0.0597462	0.0597462	TUname19138	Genbank	chrX	-	147155432	147155985	555	intronic antisense	NM_008312	Htr2c	+	146962512	147197277
ENSMUST00000149195	4.83154	0.973929	4.16227	0.0413361	0.830383	up	0	5	6	0	0	0	0.0597462	1.9249	1.85333	0.0597462	0.0597462	0.0597462	Esr1	Ensembl	chr10	+	4611592	4893083	2847	exon sense-overlapping	ENSMUST00000105590	Esr1	+	4611988	5005614
CA979239	4.80632	0.99358	4.15829	0.0414332	0.830383	up	0	0	12	0	0	0	0.0597462	0.0597462	2.62863	0.0597462	0.0597462	0.0597462	TUname63834	Genbank	chr1	+	71672193	71673075	889	intergenic
ENSMUST00000129785	4.79889	0.936596	4.06845	0.0436936	0.830383	up	3	4	3	0	0	0	1.49196	1.69872	1.21897	0.0597462	0.0597462	0.0597462	Dna2	Ensembl	chr10	+	62947109	62966135	3430	exon sense-overlapping	uc007fjk.1	Dna2	+	62965680	62971990
ENSMUST00000150868	4.7966	0.935142	4.06324	0.0438283	0.830383	up	6	0	4	0	0	0	2.19633	0.0597462	1.46274	0.0597462	0.0597462	0.0597462	Postn	Ensembl	chr3	+	54388888	54390393	624	exon sense-overlapping	NM_001198766	Postn	+	54361106	54391041
uc008eud.1	4.7966	0.935142	4.06324	0.0438283	0.830383	up	6	0	4	0	0	0	2.19633	0.0597462	1.46274	0.0597462	0.0597462	0.0597462	AK016280	UCSC_knowngene	chr18	-	43068675	43171274	1314	intergenic
AK039940	4.79239	0.90386	4.01218	0.045175	0.830383	up	9	0	0	0	0	0	2.66757	0.0597462	0.0597462	0.0597462	0.0597462	0.0597462	TUname48312	Genbank	chr1	-	136247984	136249619	1657	intergenic
ENSMUST00000177469	4.78927	2.11425	10.785	0.00102359	0.321069	up	32	2	0	1	0	0	4.31664	1.10044	0.0597462	0.626355	0.0597462	0.0597462	Isl1	Ensembl	chr13	-	116306890	116309685	1864	exon sense-overlapping	NM_021459	Isl1	-	116298269	116309688
uc007pjf.1	4.78344	0.901738	3.99815	0.0455524	0.830383	up	8	1	0	0	0	0	2.52693	0.671968	0.0597462	0.0597462	0.0597462	0.0597462	Net1	UCSC_knowngene	chr13	-	3917310	3918220	637	exon sense-overlapping	ENSMUST00000091853	Net1	-	3882564	3918220
AK142692	4.77893	0.930991	4.03564	0.0445509	0.830383	up	4	2	4	0	0	0	1.76674	1.10044	1.46274	0.0597462	0.0597462	0.0597462	TUname1009	Genbank	chr13	+	17768998	17770241	1243	intronic antisense	NM_027118	Cdk13	-	17715961	17805097
AK044335	4.75634	0.895376	3.95597	0.0467076	0.830383	up	5	4	0	0	0	0	1.99747	1.69872	0.0597462	0.0597462	0.0597462	0.0597462	TUname27008	Genbank	chr8	+	35825772	35828055	2296	natural antisense	NM_027998	Cldn23	-	35824708	35826559
ENSMUST00000127854	4.75512	0.953434	4.03889	0.0444652	0.830383	up	1	1	9	0	0	0	0.707016	0.671968	2.29245	0.0597462	0.0597462	0.0597462	Nsun2	Ensembl	chr13	+	69612602	69619593	539	exon sense-overlapping	NM_145354	Nsun2	+	69612015	69635779
TCONS_00010888	4.75398	0.893872	3.95059	0.046857	0.830383	up	8	0	1	0	0	0	2.52693	0.0597462	0.556593	0.0597462	0.0597462	0.0597462	XLOC_008282	Alexander et al 2013	chr15	+	98534920	98537495	2147	bidirectional	uc007xms.1	Kansl2	-	98519100	98534221
uc007koh.1	4.75398	0.893872	3.95059	0.046857	0.830383	up	8	0	1	0	0	0	2.52693	0.0597462	0.556593	0.0597462	0.0597462	0.0597462	AK135766	UCSC_knowngene	chr11	-	83065751	83071246	717	intronic antisense	NM_011408	Slfn2	+	83065111	83070678
ENSMUST00000161102	4.75212	0.924768	3.99411	0.0456618	0.830383	up	1	5	4	0	0	0	0.707016	1.9249	1.46274	0.0597462	0.0597462	0.0597462	Nrxn1	Ensembl	chr17	-	90208287	91092803	4813	exon sense-overlapping	uc008dvz.2	Nrxn1	-	90033643	91092802
ENSMUST00000116606	4.74722	0.893256	3.94187	0.0471005	0.830383	up	4	5	0	0	0	0	1.76674	1.9249	0.0597462	0.0597462	0.0597462	0.0597462	Gm14806	Ensembl	chrX	-	95380370	95382480	2110	intergenic
AK131967	4.7431	0.922694	3.98023	0.0460393	0.830383	up	0	6	4	0	0	0	0.0597462	2.12037	1.46274	0.0597462	0.0597462	0.0597462	TUname30784	Genbank	chr8	-	20549349	20550331	981	natural antisense	uc029wre.1	Gm10348	+	20550303	20554565
AV320845	4.73566	0.889632	3.92235	0.0476504	0.830383	up	6	2	1	0	0	0	2.19633	1.10044	0.556593	0.0597462	0.0597462	0.0597462	TUname63355	Genbank	chr18	-	75341438	75341676	245	intergenic
ENSMUST00000116000	4.73163	0.919163	3.96103	0.0465673	0.830383	up	2	3	5	0	0	0	1.15223	1.43038	1.67121	0.0597462	0.0597462	0.0597462	Gm10698	Ensembl	chr9	+	33728212	33728889	677	intergenic
ENSMUST00000153138	4.72304	2.09581	10.3916	0.00126624	0.378269	up	11	9	17	0	1	0	2.91339	2.58519	3.05779	0.0597462	0.621297	0.0597462	Oscp1	Ensembl	chr4	+	126082927	126084423	402	exon sense-overlapping	NM_172701	Oscp1	+	126058564	126089334
ENSMUST00000124855	4.71688	0.943895	3.97918	0.0460681	0.830383	up	0	1	10	0	0	0	0.0597462	0.671968	2.41342	0.0597462	0.0597462	0.0597462	Gm11674	Ensembl	chr11	-	111796346	111800876	3005	intergenic
AK156888	4.71031	0.884782	3.88531	0.0487125	0.830383	up	0	9	0	0	0	0	0.0597462	2.58519	0.0597462	0.0597462	0.0597462	0.0597462	TUname4508	Genbank	chr1	-	34338180	34340422	2237	intergenic
ENSMUST00000127438	4.71031	0.884782	3.88531	0.0487125	0.830383	up	0	9	0	0	0	0	0.0597462	2.58519	0.0597462	0.0597462	0.0597462	0.0597462	Mthfs	Ensembl	chr9	+	89210675	89239981	765	exon sense-overlapping	NM_026829	Mthfs	+	89211189	89240225
uc029ste.1	4.71031	0.884782	3.88531	0.0487125	0.830383	up	0	9	0	0	0	0	0.0597462	2.58519	0.0597462	0.0597462	0.0597462	0.0597462	DQ544345	UCSC_knowngene	chr15	-	78665322	78665355	33	intergenic
ENSMUST00000117873	4.71031	0.884782	3.88531	0.0487125	0.830383	up	0	9	0	0	0	0	0.0597462	2.58519	0.0597462	0.0597462	0.0597462	0.0597462	Gm14083	Ensembl	chr2	-	143129719	143130339	620	intergenic
NR_040699	4.69849	0.881158	3.86566	0.049286	0.830383	up	2	6	1	0	0	0	1.15223	2.12037	0.556593	0.0597462	0.0597462	0.0597462	4930429D17Rik	RefSeq	chr5	-	103230374	103299029	1624	intergenic
TCONS_00006694	4.69242	0.909412	3.89988	0.0482917	0.830383	up	1	3	6	0	0	0	0.707016	1.43038	1.85333	0.0597462	0.0597462	0.0597462	XLOC_005004	Alexander et al 2013	chr12	+	21543292	21554681	639	intergenic
ENSMUST00000172555	4.68707	0.936388	3.93272	0.0473575	0.830383	up	0	0	11	0	0	0	0.0597462	0.0597462	2.52504	0.0597462	0.0597462	0.0597462	Pax3	Ensembl	chr1	-	78183455	78197113	3271	exon sense-overlapping	NM_008781	Pax3	-	78101266	78197136
CD769712	4.68707	0.936388	3.93272	0.0473575	0.830383	up	0	0	11	0	0	0	0.0597462	0.0597462	2.52504	0.0597462	0.0597462	0.0597462	TUname63876	Genbank	chr3	-	121606529	121616139	307	intergenic
TCONS_00029198	4.68707	0.936388	3.93272	0.0473575	0.830383	up	0	0	11	0	0	0	0.0597462	0.0597462	2.52504	0.0597462	0.0597462	0.0597462	XLOC_022014	Alexander et al 2013	chr7	+	125462860	125464195	1275	intergenic
NR_038050	4.68311	0.907341	3.88589	0.0486957	0.830383	up	0	4	6	0	0	0	0.0597462	1.69872	1.85333	0.0597462	0.0597462	0.0597462	D130020L05Rik	RefSeq	chr12	+	101082450	101088927	2935	natural antisense	uc007otk.2	Smek1	-	101056970	101083702
uc008jlk.1	4.67963	0.876925	3.83721	0.0501291	0.830383	up	0	8	1	0	0	0	0.0597462	2.44625	0.556593	0.0597462	0.0597462	0.0597462	AK142949	UCSC_knowngene	chr2	+	36202311	36212902	1979	intergenic
ENSMUST00000131294	4.67459	0.873906	3.82619	0.0504596	0.830383	up	6	0	3	0	0	0	2.19633	0.0597462	1.21897	0.0597462	0.0597462	0.0597462	Lig1	Ensembl	chr7	+	13307186	13311365	946	exon sense-overlapping	NM_001083188	Lig1	+	13279264	13311427
uc008say.1	4.65236	0.899666	3.83837	0.0500944	0.830383	up	0	3	7	0	0	0	0.0597462	1.43038	2.01501	0.0597462	0.0597462	0.0597462	AK144882	UCSC_knowngene	chr4	-	14212011	14291309	902	intergenic
BC048639	4.64843	0.869068	3.78886	0.051597	0.830383	up	0	7	2	0	0	0	0.0597462	2.29249	0.925468	0.0597462	0.0597462	0.0597462	TUname10775	Genbank	chr16	+	59554063	59554754	722	natural antisense	NM_174848	Crybg3	-	59490774	59555752
AK035480	4.64027	0.89613	3.81884	0.0506816	0.830383	up	2	0	8	0	0	0	1.15223	0.0597462	2.16039	0.0597462	0.0597462	0.0597462	TUname26095	Genbank	chr12	+	79902744	79904577	1838	intergenic
AK045311	4.63356	0.863929	3.76339	0.0523885	0.830383	up	5	0	4	0	0	0	1.99747	0.0597462	1.46274	0.0597462	0.0597462	0.0597462	TUname11817	Genbank	chr9	+	91437836	91439474	1638	intergenic
ENSMUST00000131591	4.62744	0.830107	3.70568	0.0542297	0.830383	up	8	0	0	0	0	0	2.52693	0.0597462	0.0597462	0.0597462	0.0597462	0.0597462	Cybb	Ensembl	chrX	-	9464987	9469270	928	exon sense-overlapping	ENSMUST00000015484	Cybb	-	9435251	9469324
ENSMUST00000155403	4.62744	0.830107	3.70568	0.0542297	0.830383	up	8	0	0	0	0	0	2.52693	0.0597462	0.0597462	0.0597462	0.0597462	0.0597462	Tnfaip8	Ensembl	chr18	+	50051709	50053415	790	exon sense-overlapping	ENSMUST00000134348	Tnfaip8	+	50051717	50090357
ENSMUST00000149443	4.62744	0.830107	3.70568	0.0542297	0.830383	up	8	0	0	0	0	0	2.52693	0.0597462	0.0597462	0.0597462	0.0597462	0.0597462	Hormad2	Ensembl	chr11	-	4424067	4427262	323	exon sense-overlapping	ENSMUST00000109948	Hormad2	-	4345813	4440745
ENSMUST00000181775	4.62744	0.830107	3.70568	0.0542297	0.830383	up	8	0	0	0	0	0	2.52693	0.0597462	0.0597462	0.0597462	0.0597462	0.0597462	Gm26785	Ensembl	chr17	+	46273478	46280060	2914	intronic antisense	NM_001252475	Tjap1	-	46257850	46283026
AK018645	4.62744	0.830107	3.70568	0.0542297	0.830383	up	8	0	0	0	0	0	2.52693	0.0597462	0.0597462	0.0597462	0.0597462	0.0597462	TUname28460	Genbank	chr11	+	109765416	109766246	832	intergenic
ENSMUST00000152188	4.62744	0.830107	3.70568	0.0542297	0.830383	up	8	0	0	0	0	0	2.52693	0.0597462	0.0597462	0.0597462	0.0597462	0.0597462	B430010I23Rik	Ensembl	chr8	+	41017737	41020542	1168	intronic antisense	NM_001005863	Mtus1	-	40990911	41133726
ENSMUST00000175676	4.62744	0.830107	3.70568	0.0542297	0.830383	up	8	0	0	0	0	0	2.52693	0.0597462	0.0597462	0.0597462	0.0597462	0.0597462	Txlnb	Ensembl	chr10	+	17796225	17807908	1786	exon sense-overlapping	NM_138628	Txlnb	+	17796218	17845663
ENSMUST00000134627	4.62744	0.830107	3.70568	0.0542297	0.830383	up	8	0	0	0	0	0	2.52693	0.0597462	0.0597462	0.0597462	0.0597462	0.0597462	Gm15271	Ensembl	chr10	+	24447489	24452657	2110	intergenic
ENSMUST00000174185	4.62744	0.830107	3.70568	0.0542297	0.830383	up	8	0	0	0	0	0	2.52693	0.0597462	0.0597462	0.0597462	0.0597462	0.0597462	2610204G22Rik	Ensembl	chr4	+	155761177	155769264	482	natural antisense	NM_147776	Vwa1	-	155768494	155774561
uc008htr.1	4.62744	0.830107	3.70568	0.0542297	0.830383	up	8	0	0	0	0	0	2.52693	0.0597462	0.0597462	0.0597462	0.0597462	0.0597462	AK204799	UCSC_knowngene	chr19	-	46486312	46486694	382	natural antisense	ENSMUST00000039922	Sufu	+	46396895	46488804
ENSMUST00000146839	4.62744	0.830107	3.70568	0.0542297	0.830383	up	8	0	0	0	0	0	2.52693	0.0597462	0.0597462	0.0597462	0.0597462	0.0597462	Ltbp1	Ensembl	chr17	+	75006293	75008799	519	exon sense-overlapping	NM_019919	Ltbp1	+	75005528	75392967
ENSMUST00000119445	4.62744	0.830107	3.70568	0.0542297	0.830383	up	8	0	0	0	0	0	2.52693	0.0597462	0.0597462	0.0597462	0.0597462	0.0597462	Gm13444	Ensembl	chr2	-	35483383	35483905	522	intergenic
TCONS_00032435	4.62744	0.830107	3.70568	0.0542297	0.830383	up	8	0	0	0	0	0	2.52693	0.0597462	0.0597462	0.0597462	0.0597462	0.0597462	XLOC_024281	Alexander et al 2013	chr8	-	27232760	27250892	1410	intergenic
ENSMUST00000178263	4.62744	0.830107	3.70568	0.0542297	0.830383	up	8	0	0	0	0	0	2.52693	0.0597462	0.0597462	0.0597462	0.0597462	0.0597462	Gm12651	Ensembl	chr4	-	93904023	93904470	447	intergenic
uc008emz.1	4.62744	0.830107	3.70568	0.0542297	0.830383	up	8	0	0	0	0	0	2.52693	0.0597462	0.0597462	0.0597462	0.0597462	0.0597462	AK021191	UCSC_knowngene	chr18	+	35913131	35916772	677	intergenic
ENSMUST00000157537	4.62744	0.830107	3.70568	0.0542297	0.830383	up	8	0	0	0	0	0	2.52693	0.0597462	0.0597462	0.0597462	0.0597462	0.0597462	Gm23539	Ensembl	chr8	-	31544462	31544686	224	intergenic
TCONS_00020997	4.62744	0.830107	3.70568	0.0542297	0.830383	up	8	0	0	0	0	0	2.52693	0.0597462	0.0597462	0.0597462	0.0597462	0.0597462	XLOC_015846	Alexander et al 2013	chr3	-	82146237	82150192	1113	intergenic
BY669118	4.62744	0.830107	3.70568	0.0542297	0.830383	up	8	0	0	0	0	0	2.52693	0.0597462	0.0597462	0.0597462	0.0597462	0.0597462	TUname63768	Genbank	chr15	-	13312039	13312387	357	intergenic
AK142636	4.62744	0.830107	3.70568	0.0542297	0.830383	up	8	0	0	0	0	0	2.52693	0.0597462	0.0597462	0.0597462	0.0597462	0.0597462	TUname59137	Genbank	chr5	+	140407047	140419155	1516	intergenic
uc009eap.1	4.62644	0.863327	3.75463	0.0526637	0.830383	up	1	5	3	0	0	0	0.707016	1.9249	1.21897	0.0597462	0.0597462	0.0597462	DQ716963	UCSC_knowngene	chr6	+	127814895	127814945	50	intergenic
ENSMUST00000130274	4.62644	0.863327	3.75463	0.0526637	0.830383	up	1	5	3	0	0	0	0.707016	1.9249	1.21897	0.0597462	0.0597462	0.0597462	Eps8	Ensembl	chr6	-	137478132	137519895	2673	exon sense-overlapping	NM_001271587	Eps8	-	137477244	137571009
ENSMUST00000160341	4.62381	0.861814	3.74903	0.0528404	0.830383	up	4	1	4	0	0	0	1.76674	0.671968	1.46274	0.0597462	0.0597462	0.0597462	Hmox1	Ensembl	chr8	+	75093640	75096451	728	exon sense-overlapping	NM_010442	Hmox1	+	75093617	75100593
ENSMUST00000119897	4.62381	0.861814	3.74903	0.0528404	0.830383	up	4	1	4	0	0	0	1.76674	0.671968	1.46274	0.0597462	0.0597462	0.0597462	Rpl21-ps9	Ensembl	chr2	+	156386740	156387222	482	intergenic
ENSMUST00000119289	4.62381	0.861814	3.74903	0.0528404	0.830383	up	4	1	4	0	0	0	1.76674	0.671968	1.46274	0.0597462	0.0597462	0.0597462	Gm13473	Ensembl	chr2	+	38939342	38939929	367	intron sense-overlapping	NM_172854	Olfml2a	+	38931979	38960585
ENSMUST00000134073	4.62381	0.861814	3.74903	0.0528404	0.830383	up	4	1	4	0	0	0	1.76674	0.671968	1.46274	0.0597462	0.0597462	0.0597462	Vwf	Ensembl	chr6	+	125603549	125642924	3175	exon sense-overlapping	NM_011708	Vwf	+	125552947	125686679
uc009dzy.1	4.61752	0.827943	3.69105	0.0547073	0.830383	up	7	1	0	0	0	0	2.37108	0.671968	0.0597462	0.0597462	0.0597462	0.0597462	DQ685977	UCSC_knowngene	chr6	+	127807326	127807356	30	intergenic
ENSMUST00000184327	4.61667	0.861213	3.74027	0.0531182	0.830383	up	0	6	3	0	0	0	0.0597462	2.12037	1.21897	0.0597462	0.0597462	0.0597462	GNAS-AS1_4	Ensembl	chr2	+	174295070	174295192	122	intron sense-overlapping	NM_019690	Gnas	+	174284319	174338084
CB946499	4.60754	0.825779	3.67641	0.0551899	0.830383	up	6	2	0	0	0	0	2.19633	1.10044	0.0597462	0.0597462	0.0597462	0.0597462	TUname63865	Genbank	chr6	+	29104228	29272330	270	intronic antisense	ENSMUST00000162242	Impdh1	-	29200444	29203420
ENSMUST00000126043	4.60417	0.857585	3.72026	0.0537582	0.830383	up	2	3	4	0	0	0	1.15223	1.43038	1.46274	0.0597462	0.0597462	0.0597462	Map2k3	Ensembl	chr11	+	60941879	60946771	694	exon sense-overlapping	NM_008928	Map2k3	+	60932056	60952803
ENSMUST00000131533	4.59428	0.855472	3.70586	0.0542241	0.830383	up	1	4	4	0	0	0	0.707016	1.69872	1.46274	0.0597462	0.0597462	0.0597462	Gm13564	Ensembl	chr2	-	62452935	62456648	657	intergenic
NR_077063	4.58929	0.884319	3.74268	0.0530416	0.830383	up	0	1	9	0	0	0	0.0597462	0.671968	2.29245	0.0597462	0.0597462	0.0597462	2310002F09Rik	RefSeq	chr7	-	43745465	43755936	2554	intergenic
AK043058	4.58743	0.821453	3.64706	0.0561706	0.830383	up	4	4	0	0	0	0	1.76674	1.69872	0.0597462	0.0597462	0.0597462	0.0597462	TUname43732	Genbank	chr8	+	46313800	46314607	811	intergenic
ENSMUST00000153417	4.58743	0.821453	3.64706	0.0561706	0.830383	up	4	4	0	0	0	0	1.76674	1.69872	0.0597462	0.0597462	0.0597462	0.0597462	Chm	Ensembl	chrX	-	113043173	113047579	706	exon sense-overlapping	NM_018818	Chm	-	113040591	113185515
ENSMUST00000130391	4.58743	0.821453	3.64706	0.0561706	0.830383	up	4	4	0	0	0	0	1.76674	1.69872	0.0597462	0.0597462	0.0597462	0.0597462	BC028471	Ensembl	chr5	+	149369262	149392486	649	intergenic
ENSMUST00000181028	4.58743	0.821453	3.64706	0.0561706	0.830383	up	4	4	0	0	0	0	1.76674	1.69872	0.0597462	0.0597462	0.0597462	0.0597462	Gm26628	Ensembl	chr6	-	71961144	71963775	1719	natural antisense	NM_009088	Polr1a	+	71909052	71979360
AK006142	4.58743	0.821453	3.64706	0.0561706	0.830383	up	4	4	0	0	0	0	1.76674	1.69872	0.0597462	0.0597462	0.0597462	0.0597462	TUname59253	Genbank	chr16	-	46183151	46183604	453	intergenic
AK027997	4.58743	0.821453	3.64706	0.0561706	0.830383	up	4	4	0	0	0	0	1.76674	1.69872	0.0597462	0.0597462	0.0597462	0.0597462	TUname45905	Genbank	chr12	-	75610686	75611286	600	intergenic
AK133274	4.58471	0.819888	3.64128	0.0563659	0.830383	up	7	0	1	0	0	0	2.37108	0.0597462	0.556593	0.0597462	0.0597462	0.0597462	TUname2827	Genbank	chr5	-	31563399	31569072	3964	intergenic
ENSMUST00000124816	4.58434	0.853359	3.69143	0.0546948	0.830383	up	0	5	4	0	0	0	0.0597462	1.9249	1.46274	0.0597462	0.0597462	0.0597462	Ctla4	Ensembl	chr1	+	60886999	60912716	691	exon sense-overlapping	ENSMUST00000097720	Ctla4	+	60909170	60914769
AK005575	4.58434	0.853359	3.69143	0.0546948	0.830383	up	0	5	4	0	0	0	0.0597462	1.9249	1.46274	0.0597462	0.0597462	0.0597462	TUname50200	Genbank	chr17	+	33685544	33685786	244	natural antisense	NM_145486	March2	-	33685691	33718677
ENSMUST00000150430	4.57729	0.819292	3.63236	0.0566688	0.830383	up	3	5	0	0	0	0	1.49196	1.9249	0.0597462	0.0597462	0.0597462	0.0597462	Gale	Ensembl	chr4	+	135965618	135967703	930	exon sense-overlapping	NM_178389	Gale	+	135965164	135968178
ENSMUST00000125700	4.57455	0.817725	3.62656	0.0568665	0.830383	up	6	1	1	0	0	0	2.19633	0.671968	0.556593	0.0597462	0.0597462	0.0597462	Gm15241	Ensembl	chrX	-	160488548	160499870	474	natural antisense	NM_001079847	Gpr64	+	160390689	160498070
ENSMUST00000148620	4.57455	0.817725	3.62656	0.0568665	0.830383	up	6	1	1	0	0	0	2.19633	0.671968	0.556593	0.0597462	0.0597462	0.0597462	P4ha3	Ensembl	chr7	+	100285541	100298687	1342	exon sense-overlapping	uc012fqc.1	P4ha3	+	100293746	100319699
ENSMUST00000156808	4.57455	0.817725	3.62656	0.0568665	0.830383	up	6	1	1	0	0	0	2.19633	0.671968	0.556593	0.0597462	0.0597462	0.0597462	Prpf38b	Ensembl	chr3	-	108904620	108907981	531	exon sense-overlapping	NM_025845	Prpf38b	-	108902806	108911704
ENSMUST00000123931	4.56711	0.81713	3.61764	0.0571723	0.830383	up	2	6	0	0	0	0	1.15223	2.12037	0.0597462	0.0597462	0.0597462	0.0597462	Rps27l	Ensembl	chr9	+	66948562	66949511	338	exon sense-overlapping	ENSMUST00000127896	Rps27l	+	66946090	66949514
ENSMUST00000143318	4.56155	0.847618	3.65685	0.0558415	0.830383	up	1	3	5	0	0	0	0.707016	1.43038	1.67121	0.0597462	0.0597462	0.0597462	Csrp2bp	Ensembl	chr2	+	144388974	144393467	567	exon sense-overlapping	NM_001166640	Csrp2bp	+	144369031	144407675
ENSMUST00000151948	4.55694	0.876647	3.69452	0.0545939	0.830383	up	0	0	10	0	0	0	0.0597462	0.0597462	2.41342	0.0597462	0.0597462	0.0597462	Pdlim4	Ensembl	chr11	-	54063722	54064568	361	exon sense-overlapping	ENSMUST00000144477	Pdlim4	-	54055919	54064796
AK086612	4.55694	0.876647	3.69452	0.0545939	0.830383	up	0	0	10	0	0	0	0.0597462	0.0597462	2.41342	0.0597462	0.0597462	0.0597462	TUname27198	Genbank	chr3	-	110243861	110244628	766	intergenic
ENSMUST00000176017	4.55694	0.876647	3.69452	0.0545939	0.830383	up	0	0	10	0	0	0	0.0597462	0.0597462	2.41342	0.0597462	0.0597462	0.0597462	Vmn1r-ps22	Ensembl	chr6	-	58494347	58495247	900	intergenic
AK139592	4.55694	0.876647	3.69452	0.0545939	0.830383	up	0	0	10	0	0	0	0.0597462	0.0597462	2.41342	0.0597462	0.0597462	0.0597462	TUname35346	Genbank	chr1	+	183748976	183809746	632	intergenic
AK081589	4.55694	0.876647	3.69452	0.0545939	0.830383	up	0	0	10	0	0	0	0.0597462	0.0597462	2.41342	0.0597462	0.0597462	0.0597462	TUname35378	Genbank	chr8	+	92408417	92412019	3603	intergenic
ENSMUST00000155808	4.55687	0.81497	3.6029	0.057681	0.830383	up	1	7	0	0	0	0	0.707016	2.29249	0.0597462	0.0597462	0.0597462	0.0597462	Cenpl	Ensembl	chr1	+	161076024	161083381	802	exon sense-overlapping	NM_027429	Cenpl	+	161070891	161086343
ENSMUST00000139016	4.55408	0.813402	3.59707	0.0578837	0.830383	up	4	3	1	0	0	0	1.76674	1.43038	0.556593	0.0597462	0.0597462	0.0597462	Clcc1	Ensembl	chr3	+	108663384	108668827	598	exon sense-overlapping	NM_001177771	Clcc1	+	108653939	108678840
uc009ogl.1	4.55408	0.813402	3.59707	0.0578837	0.830383	up	4	3	1	0	0	0	1.76674	1.43038	0.556593	0.0597462	0.0597462	0.0597462	AK006623	UCSC_knowngene	chr9	+	16599379	16599802	317	intergenic
ENSMUST00000137012	4.54657	0.81281	3.58815	0.0581952	0.830383	up	0	8	0	0	0	0	0.0597462	2.44625	0.0597462	0.0597462	0.0597462	0.0597462	Esr1	Ensembl	chr10	+	4936525	5001656	1019	exon sense-overlapping	ENSMUST00000105588	Esr1	+	4710154	4967336
NR_026924	4.54657	0.81281	3.58815	0.0581952	0.830383	up	0	8	0	0	0	0	0.0597462	2.44625	0.0597462	0.0597462	0.0597462	0.0597462	1700020N18Rik	RefSeq	chr1	-	91404878	91406029	547	intergenic
AA760424	4.54657	0.81281	3.58815	0.0581952	0.830383	up	0	8	0	0	0	0	0.0597462	2.44625	0.0597462	0.0597462	0.0597462	0.0597462	TUname63173	Genbank	chr3	+	149513158	149513561	403	intergenic
ENSMUST00000121711	4.54657	0.81281	3.58815	0.0581952	0.830383	up	0	8	0	0	0	0	0.0597462	2.44625	0.0597462	0.0597462	0.0597462	0.0597462	Gm13419	Ensembl	chr2	+	34830929	34831110	181	intergenic
uc008vsw.1	4.54657	0.81281	3.58815	0.0581952	0.830383	up	0	8	0	0	0	0	0.0597462	2.44625	0.0597462	0.0597462	0.0597462	0.0597462	AK145533	UCSC_knowngene	chr4	+	147361307	147364419	1754	exon sense-overlapping	ENSMUST00000133078	Gm13145	+	147361302	147390289
ENSMUST00000122049	4.54657	0.81281	3.58815	0.0581952	0.830383	up	0	8	0	0	0	0	0.0597462	2.44625	0.0597462	0.0597462	0.0597462	0.0597462	Gm15173	Ensembl	chrX	-	157612688	157613121	433	intergenic
AK139062	4.54657	0.81281	3.58815	0.0581952	0.830383	up	0	8	0	0	0	0	0.0597462	2.44625	0.0597462	0.0597462	0.0597462	0.0597462	TUname5983	Genbank	chr18	-	54768383	54823789	1148	intergenic
AK084216	4.54657	0.81281	3.58815	0.0581952	0.830383	up	0	8	0	0	0	0	0.0597462	2.44625	0.0597462	0.0597462	0.0597462	0.0597462	TUname54716	Genbank	chr10	+	63336153	63337362	1212	natural antisense	ENSMUST00000120239	Sirt1	-	63319004	63381704
ENSMUST00000150196	4.54657	0.81281	3.58815	0.0581952	0.830383	up	0	8	0	0	0	0	0.0597462	2.44625	0.0597462	0.0597462	0.0597462	0.0597462	Dpys	Ensembl	chr15	-	39856581	39857470	528	exon sense-overlapping	NM_022722	Dpys	-	39768484	39857470
uc009ebg.1	4.54657	0.81281	3.58815	0.0581952	0.830383	up	0	8	0	0	0	0	0.0597462	2.44625	0.0597462	0.0597462	0.0597462	0.0597462	DQ705175	UCSC_knowngene	chr6	+	127818845	127818880	35	intergenic
ENSMUST00000118399	4.54657	0.81281	3.58815	0.0581952	0.830383	up	0	8	0	0	0	0	0.0597462	2.44625	0.0597462	0.0597462	0.0597462	0.0597462	Gm15174	Ensembl	chrX	-	157800023	157801346	1323	intergenic
AK050907	4.54657	0.81281	3.58815	0.0581952	0.830383	up	0	8	0	0	0	0	0.0597462	2.44625	0.0597462	0.0597462	0.0597462	0.0597462	TUname44184	Genbank	chr10	+	117224588	117224954	367	bidirectional	NM_026570	Yeats4	-	117215140	117224507
ENSMUST00000156049	4.54657	0.81281	3.58815	0.0581952	0.830383	up	0	8	0	0	0	0	0.0597462	2.44625	0.0597462	0.0597462	0.0597462	0.0597462	Hc	Ensembl	chr2	-	34991195	34993336	659	exon sense-overlapping	NM_010406	Hc	-	34983330	35061441
ENSMUST00000175829	4.54657	0.81281	3.58815	0.0581952	0.830383	up	0	8	0	0	0	0	0.0597462	2.44625	0.0597462	0.0597462	0.0597462	0.0597462	Gm7584	Ensembl	chr10	+	17817378	17818318	940	intron sense-overlapping	NM_138628	Txlnb	+	17796218	17845663
ENSMUST00000172872	4.54657	0.81281	3.58815	0.0581952	0.830383	up	0	8	0	0	0	0	0.0597462	2.44625	0.0597462	0.0597462	0.0597462	0.0597462	Gm20467	Ensembl	chr19	-	43609076	43610625	994	intergenic
uc009qhb.2	4.54657	0.81281	3.58815	0.0581952	0.830383	up	0	8	0	0	0	0	0.0597462	2.44625	0.0597462	0.0597462	0.0597462	0.0597462	DQ550964	UCSC_knowngene	chr9	-	67704609	67704669	60	intergenic
ENSMUST00000143053	4.54095	0.809673	3.57645	0.0586066	0.830383	up	6	0	2	0	0	0	2.19633	0.0597462	0.925468	0.0597462	0.0597462	0.0597462	Atg2a	Ensembl	chr19	+	6258340	6260132	672	exon sense-overlapping	ENSMUST00000145600	Atg2a	+	6245464	6262295
CJ276914	4.54095	0.809673	3.57645	0.0586066	0.830383	up	6	0	2	0	0	0	2.19633	0.0597462	0.925468	0.0597462	0.0597462	0.0597462	TUname63953	Genbank	chr3	-	19734148	20043836	397	intronic antisense	ENSMUST00000108325	Cp	+	19957283	19992525
AK134601	4.54095	0.809673	3.57645	0.0586066	0.830383	up	6	0	2	0	0	0	2.19633	0.0597462	0.925468	0.0597462	0.0597462	0.0597462	TUname41382	Genbank	chr1	+	191373266	191375042	1777	intronic antisense	NM_144880	Ppp2r5a	-	191351980	191397041
ENSMUST00000138233	4.54095	0.809673	3.57645	0.0586066	0.830383	up	6	0	2	0	0	0	2.19633	0.0597462	0.925468	0.0597462	0.0597462	0.0597462	Coq4	Ensembl	chr2	+	29795564	29796986	1044	exon sense-overlapping	NM_178693	Coq4	+	29788262	29797743
ENSMUST00000181318	4.54095	0.809673	3.57645	0.0586066	0.830383	up	6	0	2	0	0	0	2.19633	0.0597462	0.925468	0.0597462	0.0597462	0.0597462	Gm26693	Ensembl	chr17	+	32810143	32821697	1021	natural antisense	NM_177359	Zfp799	-	32817203	32830248
NR_045186	4.53055	0.807513	3.56165	0.0591313	0.830383	up	5	1	2	0	0	0	1.99747	0.671968	0.925468	0.0597462	0.0597462	0.0597462	4930430F21Rik	RefSeq	chr15	+	31039125	31043331	804	intergenic
ENSMUST00000148076	4.52823	0.839766	3.60761	0.0575182	0.830383	up	1	2	6	0	0	0	0.707016	1.10044	1.85333	0.0597462	0.0597462	0.0597462	Dlg3	Ensembl	chrX	+	100796576	100806613	326	exon sense-overlapping	NM_001177778	Dlg3	+	100767722	100818410
ENSMUST00000141965	4.5201	0.805353	3.54683	0.0596616	0.830383	up	4	2	2	0	0	0	1.76674	1.10044	0.925468	0.0597462	0.0597462	0.0597462	Inadl	Ensembl	chr4	+	98436942	98441137	612	exon sense-overlapping	ENSMUST00000107034	Inadl	+	98395854	98674490
ENSMUST00000118271	4.51794	0.837656	3.59307	0.0580233	0.830383	up	0	3	6	0	0	0	0.0597462	1.43038	1.85333	0.0597462	0.0597462	0.0597462	Gm12463	Ensembl	chr4	-	44752276	44753125	849	intergenic
AK082112	4.51248	0.804765	3.5379	0.0599835	0.830383	up	0	7	1	0	0	0	0.0597462	2.29249	0.556593	0.0597462	0.0597462	0.0597462	TUname5630	Genbank	chr3	-	32371577	32372989	1412	intergenic
ENSMUST00000171203	4.50471	0.834025	3.57272	0.0587384	0.830383	up	2	0	7	0	0	0	1.15223	0.0597462	2.01501	0.0597462	0.0597462	0.0597462	Ehd1	Ensembl	chr19	+	6294180	6297877	791	exon sense-overlapping	NM_010119	Ehd1	+	6276895	6300096
ENSMUST00000174261	4.50471	0.834025	3.57272	0.0587384	0.830383	up	2	0	7	0	0	0	1.15223	0.0597462	2.01501	0.0597462	0.0597462	0.0597462	Gm20530	Ensembl	chr17	+	36094180	36094763	254	intronic antisense	uc008cjx.3	H2-T9	-	36038408	36121444
ENSMUST00000124736	4.49611	0.799464	3.51122	0.0609571	0.830383	up	5	0	3	0	0	0	1.99747	0.0597462	1.21897	0.0597462	0.0597462	0.0597462	Psmd13	Ensembl	chr7	+	140882437	140886863	361	exon sense-overlapping	ENSMUST00000163610	Psmd13	+	140882471	140898288
ENSMUST00000151546	4.48841	0.798879	3.50228	0.0612866	0.830383	up	1	5	2	0	0	0	0.707016	1.9249	0.925468	0.0597462	0.0597462	0.0597462	Ap1m1	Ensembl	chr8	+	72252934	72256912	848	exon sense-overlapping	NM_007456	Ap1m1	+	72240131	72257379
AK030470	4.47774	0.796722	3.4874	0.0618398	0.830383	up	0	6	2	0	0	0	0.0597462	2.12037	0.925468	0.0597462	0.0597462	0.0597462	TUname3833	Genbank	chr6	-	38532791	38535231	2443	natural antisense	NM_025363	1110001J03Rik	+	38534860	38539449
ENSMUST00000153781	4.47774	0.796722	3.4874	0.0618398	0.830383	up	0	6	2	0	0	0	0.0597462	2.12037	0.925468	0.0597462	0.0597462	0.0597462	Dffa	Ensembl	chr4	+	149107768	149108234	279	exon sense-overlapping	ENSMUST00000103216	Dffa	+	149104145	149118870
AK131803	4.47774	0.796722	3.4874	0.0618398	0.830383	up	0	6	2	0	0	0	0.0597462	2.12037	0.925468	0.0597462	0.0597462	0.0597462	TUname15807	Genbank	chr6	-	32751635	32752290	656	intergenic
AK052267	4.47774	0.796722	3.4874	0.0618398	0.830383	up	0	6	2	0	0	0	0.0597462	2.12037	0.925468	0.0597462	0.0597462	0.0597462	TUname18207	Genbank	chr1	-	66690629	66692356	1729	intronic antisense	NM_175510	Unc80	+	66468446	66699148
ENSMUST00000117532	4.47774	0.796722	3.4874	0.0618398	0.830383	up	0	6	2	0	0	0	0.0597462	2.12037	0.925468	0.0597462	0.0597462	0.0597462	Gm16202	Ensembl	chr9	-	86316140	86316684	544	intron sense-overlapping	ENSMUST00000121189	Ube2cbp	-	86307310	86464927
ENSMUST00000143525	4.47774	0.796722	3.4874	0.0618398	0.830383	up	0	6	2	0	0	0	0.0597462	2.12037	0.925468	0.0597462	0.0597462	0.0597462	Gm13963	Ensembl	chr2	-	113387106	113441094	892	natural antisense	uc008lpn.1	Fmn1	+	113441063	113525941
uc008pfb.1	4.47774	0.796722	3.4874	0.0618398	0.830383	up	0	6	2	0	0	0	0.0597462	2.12037	0.925468	0.0597462	0.0597462	0.0597462	AK081086	UCSC_knowngene	chr3	+	53924834	53943528	821	intergenic
ENSMUST00000145309	4.47774	0.796722	3.4874	0.0618398	0.830383	up	0	6	2	0	0	0	0.0597462	2.12037	0.925468	0.0597462	0.0597462	0.0597462	Ccna2	Ensembl	chr3	-	36570450	36571964	856	exon sense-overlapping	NM_009828	Ccna2	-	36564864	36571996
AK015928	4.47774	0.796722	3.4874	0.0618398	0.830383	up	0	6	2	0	0	0	0.0597462	2.12037	0.925468	0.0597462	0.0597462	0.0597462	TUname14677	Genbank	chr6	+	29915310	29915920	612	intergenic
AK088988	4.45975	0.824068	3.50846	0.0610586	0.830383	up	1	0	8	0	0	0	0.707016	0.0597462	2.16039	0.0597462	0.0597462	0.0597462	TUname5990	Genbank	chr10	-	110934292	110934897	606	intronic antisense	NM_007792	Csrp2	+	110920175	110939514
uc007nxi.1	4.45975	0.824068	3.50846	0.0610586	0.830383	up	1	0	8	0	0	0	0.707016	0.0597462	2.16039	0.0597462	0.0597462	0.0597462	AK044480	UCSC_knowngene	chr12	+	75630289	75637769	3127	natural antisense	NM_028203	Wdr89	-	75630593	75669537
ENSMUST00000172915	4.45319	0.790836	3.4516	0.0631929	0.830383	up	1	4	3	0	0	0	0.707016	1.69872	1.21897	0.0597462	0.0597462	0.0597462	Pfas	Ensembl	chr11	-	68985699	68994276	5144	exon sense-overlapping	NM_001159519	Pfas	-	68985700	69008460
ENSMUST00000142112	4.45016	0.789262	3.44559	0.0634232	0.830383	up	4	0	4	0	0	0	1.76674	0.0597462	1.46274	0.0597462	0.0597462	0.0597462	Mmgt2	Ensembl	chr11	+	62648819	62664721	374	exon sense-overlapping	ENSMUST00000129162	Mmgt2	+	62649448	62666354
TCONS_00025230	4.45016	0.789262	3.44559	0.0634232	0.830383	up	4	0	4	0	0	0	1.76674	0.0597462	1.46274	0.0597462	0.0597462	0.0597462	XLOC_019015	Alexander et al 2013	chr5	-	31577629	31580222	1363	intergenic
CN682782	4.45016	0.789262	3.44559	0.0634232	0.830383	up	4	0	4	0	0	0	1.76674	0.0597462	1.46274	0.0597462	0.0597462	0.0597462	TUname64025	Genbank	chr8	+	18903599	18904143	544	intergenic
ENSMUST00000131131	4.45016	0.789262	3.44559	0.0634232	0.830383	up	4	0	4	0	0	0	1.76674	0.0597462	1.46274	0.0597462	0.0597462	0.0597462	Ezr	Ensembl	chr17	-	6740836	6742821	643	exon sense-overlapping	NM_009510	Ezr	-	6738130	6782780
TCONS_00016047	4.45016	0.789262	3.44559	0.0634232	0.830383	up	4	0	4	0	0	0	1.76674	0.0597462	1.46274	0.0597462	0.0597462	0.0597462	XLOC_012078	Alexander et al 2013	chr19	+	59397198	59402105	3793	intergenic
ENSMUST00000148103	4.45016	0.789262	3.44559	0.0634232	0.830383	up	4	0	4	0	0	0	1.76674	0.0597462	1.46274	0.0597462	0.0597462	0.0597462	Col15a1	Ensembl	chr4	+	47258534	47262299	345	exon sense-overlapping	ENSMUST00000082303	Col15a1	+	47208160	47313163
AK139172	4.45016	0.789262	3.44559	0.0634232	0.830383	up	4	0	4	0	0	0	1.76674	0.0597462	1.46274	0.0597462	0.0597462	0.0597462	TUname41828	Genbank	chr9	-	99732759	99737867	5108	intergenic
AK142521	4.4491	0.821961	3.49381	0.0616008	0.830383	up	0	1	8	0	0	0	0.0597462	0.671968	2.16039	0.0597462	0.0597462	0.0597462	TUname16826	Genbank	chr13	+	110683911	110686925	1365	intergenic
TCONS_00003877	4.4491	0.821961	3.49381	0.0616008	0.830383	up	0	1	8	0	0	0	0.0597462	0.671968	2.16039	0.0597462	0.0597462	0.0597462	XLOC_002839	Alexander et al 2013	chr11	+	17349369	17356707	5146	intergenic
ENSMUST00000143755	4.44104	0.752589	3.40746	0.0649045	0.830383	up	7	0	0	0	0	0	2.37108	0.0597462	0.0597462	0.0597462	0.0597462	0.0597462	Gm11264	Ensembl	chr4	-	82033311	82065890	2969	intergenic
TCONS_00017837	4.44104	0.752589	3.40746	0.0649045	0.830383	up	7	0	0	0	0	0	2.37108	0.0597462	0.0597462	0.0597462	0.0597462	0.0597462	XLOC_014489	Alexander et al 2013	chr2	-	112157753	112182453	465	intergenic
AK076651	4.43926	0.787106	3.43063	0.064	0.830383	up	3	1	4	0	0	0	1.49196	0.671968	1.46274	0.0597462	0.0597462	0.0597462	TUname22247	Genbank	chr10	+	53379451	53381386	1943	natural antisense	NM_001204983	Cep85l	-	53278080	53379851
ENSMUST00000151980	4.43101	1.90371	8.002	0.00467331	0.710798	up	11	14	4	0	0	1	2.91339	3.13023	1.46274	0.0597462	0.0597462	0.718048	Rdh12	Ensembl	chr12	+	79208946	79222664	2753	exon sense-overlapping	uc007oad.1	Rdh12	+	79212077	79222661
ENSMUST00000132201	4.42989	0.750381	3.39437	0.0654216	0.830383	up	6	1	0	0	0	0	2.19633	0.671968	0.0597462	0.0597462	0.0597462	0.0597462	Bcl2l11	Ensembl	chr2	+	128128130	128128737	391	exon sense-overlapping	NM_207680	Bcl2l11	+	128126037	128162547
ENSMUST00000146479	4.42989	0.750381	3.39437	0.0654216	0.830383	up	6	1	0	0	0	0	2.19633	0.671968	0.0597462	0.0597462	0.0597462	0.0597462	Dusp2	Ensembl	chr2	+	127336609	127337504	756	exon sense-overlapping	NM_010090	Dusp2	+	127336158	127338377
ENSMUST00000153806	4.42989	0.750381	3.39437	0.0654216	0.830383	up	6	1	0	0	0	0	2.19633	0.671968	0.0597462	0.0597462	0.0597462	0.0597462	Ddx60	Ensembl	chr8	+	61984137	61988309	427	exon sense-overlapping	ENSMUST00000070631	Ddx60	+	61928088	62037701
ENSMUST00000156169	4.41373	0.814117	3.44387	0.063489	0.830383	up	0	0	9	0	0	0	0.0597462	0.0597462	2.29245	0.0597462	0.0597462	0.0597462	Gm14507	Ensembl	chr5	+	116243705	116254953	347	intronic antisense	NM_177759	Ccdc60	-	116125580	116288985
TCONS_00015222	4.41373	0.814117	3.44387	0.063489	0.830383	up	0	0	9	0	0	0	0.0597462	0.0597462	2.29245	0.0597462	0.0597462	0.0597462	XLOC_011615	Alexander et al 2013	chr18	-	73850411	73866551	1198	intronic antisense	ENSMUST00000179472	Mro	+	73859386	73879134
ENSMUST00000180898	4.41373	0.814117	3.44387	0.063489	0.830383	up	0	0	9	0	0	0	0.0597462	0.0597462	2.29245	0.0597462	0.0597462	0.0597462	Gm26697	Ensembl	chr2	-	126521201	126553662	1760	natural antisense	NM_011978	Slc27a2	+	126553023	126588243
ENSMUST00000128473	4.41373	0.814117	3.44387	0.063489	0.830383	up	0	0	9	0	0	0	0.0597462	0.0597462	2.29245	0.0597462	0.0597462	0.0597462	B230112J18Rik	Ensembl	chr5	+	116312359	116318281	602	intergenic
ENSMUST00000153023	4.41373	0.814117	3.44387	0.063489	0.830383	up	0	0	9	0	0	0	0.0597462	0.0597462	2.29245	0.0597462	0.0597462	0.0597462	Tmem51os1	Ensembl	chr4	+	142083971	142088059	3440	natural antisense	NM_145402	Tmem51	-	142030992	142084304
ENSMUST00000180862	4.41373	0.814117	3.44387	0.063489	0.830383	up	0	0	9	0	0	0	0.0597462	0.0597462	2.29245	0.0597462	0.0597462	0.0597462	Gm26872	Ensembl	chr5	-	106465799	106471007	2261	intergenic
ENSMUST00000141313	4.4074	0.745967	3.3681	0.0664727	0.830383	up	4	3	0	0	0	0	1.76674	1.43038	0.0597462	0.0597462	0.0597462	0.0597462	Pacsin3	Ensembl	chr2	+	91262912	91263533	514	exon sense-overlapping	ENSMUST00000028694	Pacsin3	+	91256812	91264678
TCONS_00035923	4.4074	0.745967	3.3681	0.0664727	0.830383	up	4	3	0	0	0	0	1.76674	1.43038	0.0597462	0.0597462	0.0597462	0.0597462	XLOC_026301	Alexander et al 2013	chrX	+	8217336	8217827	279	intergenic
ENSMUST00000118068	4.4074	0.745967	3.3681	0.0664727	0.830383	up	4	3	0	0	0	0	1.76674	1.43038	0.0597462	0.0597462	0.0597462	0.0597462	Gm15922	Ensembl	chr7	-	3733020	3739861	2043	exon sense-overlapping	uc029wde.1	Pira2	-	3731629	3845051
ENSMUST00000133329	4.4074	0.745967	3.3681	0.0664727	0.830383	up	4	3	0	0	0	0	1.76674	1.43038	0.0597462	0.0597462	0.0597462	0.0597462	Cep128	Ensembl	chr12	-	91022399	91183772	336	exon sense-overlapping	NM_181815	Cep128	-	90998491	91384409
ENSMUST00000139883	4.40621	0.780643	3.38568	0.0657675	0.830383	up	0	4	4	0	0	0	0.0597462	1.69872	1.46274	0.0597462	0.0597462	0.0597462	Tctex1d1	Ensembl	chr4	+	102991821	102992887	599	exon sense-overlapping	NM_001163767	Tctex1d1	+	102986378	103005594
ENSMUST00000138520	4.40621	0.780643	3.38568	0.0657675	0.830383	up	0	4	4	0	0	0	0.0597462	1.69872	1.46274	0.0597462	0.0597462	0.0597462	Tyms	Ensembl	chr5	-	30067890	30073522	663	exon sense-overlapping	uc012dty.1	Tyms	-	30061967	30073625
BC051595	4.40621	0.780643	3.38568	0.0657675	0.830383	up	0	4	4	0	0	0	0.0597462	1.69872	1.46274	0.0597462	0.0597462	0.0597462	TUname34839	Genbank	chr7	+	19425469	19426279	820	natural antisense	NM_172279	Mark4	-	19426074	19458494
uc007qny.1	4.40621	0.780643	3.38568	0.0657675	0.830383	up	0	4	4	0	0	0	0.0597462	1.69872	1.46274	0.0597462	0.0597462	0.0597462	AK039269	UCSC_knowngene	chr13	+	53776626	53778973	682	intergenic
ENSMUST00000121141	4.40621	0.780643	3.38568	0.0657675	0.830383	up	0	4	4	0	0	0	0.0597462	1.69872	1.46274	0.0597462	0.0597462	0.0597462	Gm3928	Ensembl	chrX	+	103075918	103077225	1307	intergenic
ENSMUST00000150218	4.40621	0.780643	3.38568	0.0657675	0.830383	up	0	4	4	0	0	0	0.0597462	1.69872	1.46274	0.0597462	0.0597462	0.0597462	Ttll9	Ensembl	chr2	+	153002780	153008482	1816	exon sense-overlapping	NM_029064	Ttll9	+	152962484	153003204
ENSMUST00000155725	4.40307	0.779065	3.37969	0.0660069	0.830383	up	3	0	5	0	0	0	1.49196	0.0597462	1.67121	0.0597462	0.0597462	0.0597462	Mob3b	Ensembl	chr4	-	35083599	35157484	1023	exon sense-overlapping	NM_178061	Mob3b	-	34949073	35157484
ENSMUST00000172065	4.39606	0.743761	3.35492	0.0670068	0.830383	up	3	4	0	0	0	0	1.49196	1.69872	0.0597462	0.0597462	0.0597462	0.0597462	Tead1	Ensembl	chr7	+	112679509	112842395	894	exon sense-overlapping	ENSMUST00000164363	Tead1	+	112742044	112898660
ENSMUST00000153167	4.39606	0.743761	3.35492	0.0670068	0.830383	up	3	4	0	0	0	0	1.49196	1.69872	0.0597462	0.0597462	0.0597462	0.0597462	Reep6	Ensembl	chr10	+	80330197	80334432	848	exon sense-overlapping	NM_139292	Reep6	+	80330144	80336441
uc009qid.1	4.39606	0.743761	3.35492	0.0670068	0.830383	up	3	4	0	0	0	0	1.49196	1.69872	0.0597462	0.0597462	0.0597462	0.0597462	DQ686644	UCSC_knowngene	chr9	-	67714072	67714111	39	intergenic
ENSMUST00000161151	4.39606	0.743761	3.35492	0.0670068	0.830383	up	3	4	0	0	0	0	1.49196	1.69872	0.0597462	0.0597462	0.0597462	0.0597462	Traf3ip3	Ensembl	chr1	-	193198125	193201502	615	exon sense-overlapping	NM_153137	Traf3ip3	-	193175503	193201546
NR_030776	4.39606	0.743761	3.35492	0.0670068	0.830383	up	3	4	0	0	0	0	1.49196	1.69872	0.0597462	0.0597462	0.0597462	0.0597462	3110021A11Rik	RefSeq	chr6	+	119848192	119849016	837	exon sense-overlapping	ENSMUST00000062454	3110021A11Rik	+	119848192	119849013
ENSMUST00000150240	4.39606	0.743761	3.35492	0.0670068	0.830383	up	3	4	0	0	0	0	1.49196	1.69872	0.0597462	0.0597462	0.0597462	0.0597462	Ehd4	Ensembl	chr2	-	120102219	120129725	393	exon sense-overlapping	NM_133838	Ehd4	-	120089486	120154575
ENSMUST00000184630	4.3947	1.90151	7.9205	0.00488874	0.720486	up	0	0	34	1	0	0	0.0597462	0.0597462	3.96455	0.626355	0.0597462	0.0597462	RP24-312G4.2	Ensembl	chr14	-	104462335	104463481	1146	exon sense-overlapping	NM_011143	Pou4f1	-	104462324	104467999
uc007uxa.1	4.39285	0.742128	3.35028	0.0671958	0.830383	up	6	0	1	0	0	0	2.19633	0.0597462	0.556593	0.0597462	0.0597462	0.0597462	AK047857	UCSC_knowngene	chr14	-	104288432	104459336	2292	intergenic
TCONS_00006871	4.39285	0.742128	3.35028	0.0671958	0.830383	up	6	0	1	0	0	0	2.19633	0.0597462	0.556593	0.0597462	0.0597462	0.0597462	XLOC_005519	Alexander et al 2013	chr12	-	24251586	24252453	590	exon sense-overlapping	ENSMUST00000169148	Gm9312	-	24251845	24252181
ENSMUST00000096101	4.39285	0.742128	3.35028	0.0671958	0.830383	up	6	0	1	0	0	0	2.19633	0.0597462	0.556593	0.0597462	0.0597462	0.0597462	Gm5874	Ensembl	chr6	+	18824551	18825058	507	intergenic
ENSMUST00000132996	4.39285	0.742128	3.35028	0.0671958	0.830383	up	6	0	1	0	0	0	2.19633	0.0597462	0.556593	0.0597462	0.0597462	0.0597462	Ubash3b	Ensembl	chr9	-	41159845	41161697	518	exon sense-overlapping	ENSMUST00000129906	Ubash3b	-	41050611	41161688
NR_077226	4.39191	0.776912	3.36676	0.0665267	0.830383	up	2	1	5	0	0	0	1.15223	0.671968	1.67121	0.0597462	0.0597462	0.0597462	Gm6297	RefSeq	chr4	-	40720153	40722841	1625	natural antisense	NM_008298	Dnaja1	+	40722467	40737151
ENSMUST00000162688	4.38143	0.739923	3.33705	0.0677384	0.830383	up	5	1	1	0	0	0	1.99747	0.671968	0.556593	0.0597462	0.0597462	0.0597462	Tcirg1	Ensembl	chr19	-	3896399	3897230	467	exon sense-overlapping	NM_001136091	Tcirg1	-	3896049	3907133
AK158384	4.37321	0.739351	3.32847	0.0680926	0.830383	up	1	6	0	0	0	0	0.707016	2.12037	0.0597462	0.0597462	0.0597462	0.0597462	TUname12619	Genbank	chr4	-	126100490	126103737	3285	bidirectional	NM_028800	Stk40	+	126103956	126141029
AK085869	4.37321	0.739351	3.32847	0.0680926	0.830383	up	1	6	0	0	0	0	0.707016	2.12037	0.0597462	0.0597462	0.0597462	0.0597462	TUname13572	Genbank	chr3	+	30828155	30830309	2154	intergenic
ENSMUST00000119851	4.37321	0.739351	3.32847	0.0680926	0.830383	up	1	6	0	0	0	0	0.707016	2.12037	0.0597462	0.0597462	0.0597462	0.0597462	Gm14111	Ensembl	chr2	-	146754706	146755705	999	intergenic
TCONS_00000242	4.37321	0.739351	3.32847	0.0680926	0.830383	up	1	6	0	0	0	0	0.707016	2.12037	0.0597462	0.0597462	0.0597462	0.0597462	XLOC_000496	Alexander et al 2013	chr1	+	136683336	136687913	273	intergenic
ENSMUST00000136093	4.36944	0.772607	3.34105	0.0675741	0.830383	up	0	3	5	0	0	0	0.0597462	1.43038	1.67121	0.0597462	0.0597462	0.0597462	Phf16	Ensembl	chrX	+	20425787	20494586	1156	exon sense-overlapping	ENSMUST00000115384	Phf16	+	20425687	20519939
TCONS_00015218	4.36648	1.83187	7.40816	0.00649376	0.771289	up	4	16	8	0	1	0	1.76674	3.30125	2.16039	0.0597462	0.621297	0.0597462	XLOC_011605	Alexander et al 2013	chr18	-	69159630	69193449	728	intergenic
ENSMUST00000130693	4.3617	0.737147	3.3152	0.0686442	0.830383	up	0	7	0	0	0	0	0.0597462	2.29249	0.0597462	0.0597462	0.0597462	0.0597462	9530053A07Rik	Ensembl	chr7	+	28129815	28141299	4650	exon sense-overlapping	NM_001164655	9530053A07Rik	+	28129465	28164811
NR_027986	4.3617	0.737147	3.3152	0.0686442	0.830383	up	0	7	0	0	0	0	0.0597462	2.29249	0.0597462	0.0597462	0.0597462	0.0597462	4930474M22Rik	RefSeq	chr17	-	14389106	14398942	613	intronic antisense	NM_022315	Smoc2	+	14279505	14404790
NR_045386	4.3617	0.737147	3.3152	0.0686442	0.830383	up	0	7	0	0	0	0	0.0597462	2.29249	0.0597462	0.0597462	0.0597462	0.0597462	1700065O20Rik	RefSeq	chr18	-	49803331	49817956	702	intergenic
TCONS_00032532	4.3617	0.737147	3.3152	0.0686442	0.830383	up	0	7	0	0	0	0	0.0597462	2.29249	0.0597462	0.0597462	0.0597462	0.0597462	XLOC_024528	Alexander et al 2013	chr8	-	89090374	89131075	1464	intergenic
AK084612	4.34679	0.73331	3.29716	0.0694021	0.830383	up	2	4	1	0	0	0	1.15223	1.69872	0.556593	0.0597462	0.0597462	0.0597462	TUname55869	Genbank	chr7	+	80947585	80948949	1367	natural antisense	ENSMUST00000117383	Sec11a	-	80915660	80947780
ENSMUST00000106001	4.34346	0.766725	3.31063	0.0688356	0.830383	up	1	1	6	0	0	0	0.707016	0.671968	1.85333	0.0597462	0.0597462	0.0597462	Col16a1	Ensembl	chr4	+	130047908	130080401	3519	exon sense-overlapping	ENSMUST00000142293	Col16a1	+	130047944	130051851
ENSMUST00000023469	4.34346	0.766725	3.31063	0.0688356	0.830383	up	1	1	6	0	0	0	0.707016	0.671968	1.85333	0.0597462	0.0597462	0.0597462	Btnl7-ps	Ensembl	chr17	-	34532876	34547651	1763	intronic antisense	uc008cby.1	Notch4	+	34226174	34586209
ENSMUST00000157280	4.34346	0.766725	3.31063	0.0688356	0.830383	up	1	1	6	0	0	0	0.707016	0.671968	1.85333	0.0597462	0.0597462	0.0597462	Gm22037	Ensembl	chr15	-	43224624	43224920	296	intergenic
ENSMUST00000150058	4.34345	0.731675	3.2924	0.0696036	0.830383	up	5	0	2	0	0	0	1.99747	0.0597462	0.925468	0.0597462	0.0597462	0.0597462	Por	Ensembl	chr5	+	135674580	135684982	344	exon sense-overlapping	ENSMUST00000153515	Por	+	135674584	135731117
ENSMUST00000135935	4.33512	0.731107	3.28381	0.0699687	0.830383	up	1	5	1	0	0	0	0.707016	1.9249	0.556593	0.0597462	0.0597462	0.0597462	Exosc8	Ensembl	chr3	-	54733600	54735035	389	exon sense-overlapping	ENSMUST00000153224	Exosc8	-	54731992	54735046
uc008ewr.1	4.332	0.764575	3.29766	0.069381	0.830383	up	0	2	6	0	0	0	0.0597462	1.10044	1.85333	0.0597462	0.0597462	0.0597462	AK089049	UCSC_knowngene	chr18	-	50013634	50016837	1214	intronic antisense	NM_001177759	Tnfaip8	+	49979426	50093229
ENSMUST00000176310	4.332	0.764575	3.29766	0.069381	0.830383	up	0	2	6	0	0	0	0.0597462	1.10044	1.85333	0.0597462	0.0597462	0.0597462	Six1	Ensembl	chr12	-	73040014	73042815	885	exon sense-overlapping	NM_009189	Six1	-	73041826	73046712
NR_045453	4.332	0.764575	3.29766	0.069381	0.830383	up	0	2	6	0	0	0	0.0597462	1.10044	1.85333	0.0597462	0.0597462	0.0597462	1700121L16Rik	RefSeq	chrX	+	104816775	104842455	561	intergenic
BI076542	4.32339	0.728905	3.27043	0.0705414	0.830383	up	0	6	1	0	0	0	0.0597462	2.12037	0.556593	0.0597462	0.0597462	0.0597462	TUname63580	Genbank	chr9	+	85862072	85862403	333	intergenic
ENSMUST00000159478	4.32339	0.728905	3.27043	0.0705414	0.830383	up	0	6	1	0	0	0	0.0597462	2.12037	0.556593	0.0597462	0.0597462	0.0597462	Tspo2	Ensembl	chr17	-	48447955	48451492	3146	exon sense-overlapping	NM_027292	Tspo2	-	48448434	48451501
ENSMUST00000136954	4.32339	0.728905	3.27043	0.0705414	0.830383	up	0	6	1	0	0	0	0.0597462	2.12037	0.556593	0.0597462	0.0597462	0.0597462	1700010I14Rik	Ensembl	chr17	+	8988382	9005263	1591	exon sense-overlapping	ENSMUST00000024650	1700010I14Rik	+	8988332	9008319
2_00006831	4.32339	0.728905	3.27043	0.0705414	0.830383	up	0	6	1	0	0	0	0.0597462	2.12037	0.556593	0.0597462	0.0597462	0.0597462	Ncapg2	Lei Sun et al 2012	chr12	+	116453225	116463718	3179	exon sense-overlapping	NM_133762	Ncapg2	+	116405401	116463531
ENSMUST00000156604	4.32339	0.728905	3.27043	0.0705414	0.830383	up	0	6	1	0	0	0	0.0597462	2.12037	0.556593	0.0597462	0.0597462	0.0597462	Txnrd2	Ensembl	chr16	+	18471850	18472249	304	exon sense-overlapping	ENSMUST00000178093	Txnrd2	+	18426437	18479067
NR_045908	4.32339	0.728905	3.27043	0.0705414	0.830383	up	0	6	1	0	0	0	0.0597462	2.12037	0.556593	0.0597462	0.0597462	0.0597462	3110015C05Rik	RefSeq	chr13	-	111211468	111229431	938	intergenic
AK156129	4.32339	0.728905	3.27043	0.0705414	0.830383	up	0	6	1	0	0	0	0.0597462	2.12037	0.556593	0.0597462	0.0597462	0.0597462	TUname6552	Genbank	chr13	+	4097497	4100831	3324	intergenic
ENSMUST00000124426	4.32134	2.4451	12.9498	0.000320078	0.159363	up	16	4	31	0	1	1	3.39019	1.69872	3.84057	0.0597462	0.621297	0.718048	Evc	Ensembl	chr5	-	37316215	37318491	537	exon sense-overlapping	ENSMUST00000114148	Evc	-	37313268	37336866
ENSMUST00000132020	4.31999	0.727269	3.26562	0.0707488	0.830383	up	3	2	2	0	0	0	1.49196	1.10044	0.925468	0.0597462	0.0597462	0.0597462	Tmem25	Ensembl	chr9	-	44793775	44799242	2837	exon sense-overlapping	ENSMUST00000114705	Tmem25	-	44793775	44799242
TCONS_00033957	4.30552	0.758694	3.26697	0.0706904	0.830383	up	1	0	7	0	0	0	0.707016	0.0597462	2.01501	0.0597462	0.0597462	0.0597462	XLOC_024987	Alexander et al 2013	chr9	+	41210805	41217848	787	intergenic
ENSMUST00000146096	4.30552	0.758694	3.26697	0.0706904	0.830383	up	1	0	7	0	0	0	0.707016	0.0597462	2.01501	0.0597462	0.0597462	0.0597462	Rhoj	Ensembl	chr12	+	75308672	75375648	630	exon sense-overlapping	NM_023275	Rhoj	+	75308312	75401455
ENSMUST00000136815	4.29972	1.76686	6.84026	0.00891366	0.830383	up	10	14	1	0	1	0	2.79571	3.13023	0.556593	0.0597462	0.621297	0.0597462	Wbscr27	Ensembl	chr5	+	134932783	134937250	745	exon sense-overlapping	ENSMUST00000111219	Wbscr27	+	134932372	134941723
ENSMUST00000137697	4.29915	1.8069	7.037	0.00798526	0.821144	up	19	3	4	0	0	1	3.6153	1.43038	1.46274	0.0597462	0.0597462	0.718048	Satb1	Ensembl	chr17	-	51739987	51742266	646	exon sense-overlapping	NM_001163632	Satb1	-	51736186	51833290
ENSMUST00000169749	4.29386	0.756546	3.25392	0.0712553	0.830383	up	0	1	7	0	0	0	0.0597462	0.671968	2.01501	0.0597462	0.0597462	0.0597462	Lpl	Ensembl	chr8	+	68890743	68895819	851	exon sense-overlapping	NM_008509	Lpl	+	68880554	68906932
ENSMUST00000181585	4.29386	0.756546	3.25392	0.0712553	0.830383	up	0	1	7	0	0	0	0.0597462	0.671968	2.01501	0.0597462	0.0597462	0.0597462	Gm26595	Ensembl	chr17	+	5817471	5817955	484	intergenic
ENSMUST00000157159	4.2928	0.721229	3.23384	0.0721339	0.830383	up	4	0	3	0	0	0	1.76674	0.0597462	1.21897	0.0597462	0.0597462	0.0597462	Gm23171	Ensembl	chr5	+	124257762	124258026	264	intronic antisense	NM_001081323	Mphosph9	-	124250958	124328451
uc007xsy.1	4.2928	0.721229	3.23384	0.0721339	0.830383	up	4	0	3	0	0	0	1.76674	0.0597462	1.21897	0.0597462	0.0597462	0.0597462	AK138921	UCSC_knowngene	chr15	+	101322887	101405834	2534	natural antisense	uc007xtc.1	Krt80	-	101356933	101370125
ENSMUST00000160057	4.2928	0.721229	3.23384	0.0721339	0.830383	up	4	0	3	0	0	0	1.76674	0.0597462	1.21897	0.0597462	0.0597462	0.0597462	Tcp11l2	Ensembl	chr10	+	84594652	84604990	616	exon sense-overlapping	NM_146008	Tcp11l2	+	84576946	84614355
ENSMUST00000137198	4.28433	0.720667	3.22524	0.0725136	0.830383	up	0	5	2	0	0	0	0.0597462	1.9249	0.925468	0.0597462	0.0597462	0.0597462	A330050B17Rik	Ensembl	chr3	+	35999832	36006907	2686	natural antisense	NM_023644	Mccc1	-	35959305	36000678
AK085973	4.26877	0.716829	3.20679	0.0733358	0.830383	up	2	2	3	0	0	0	1.15223	1.10044	1.21897	0.0597462	0.0597462	0.0597462	TUname53644	Genbank	chr7	-	19340967	19342515	1552	intergenic
ENSMUST00000138066	4.25502	0.748521	3.20983	0.0731996	0.830383	up	0	0	8	0	0	0	0.0597462	0.0597462	2.16039	0.0597462	0.0597462	0.0597462	Erbb2	Ensembl	chr11	+	98427079	98427572	388	exon sense-overlapping	NM_001003817	Erbb2	+	98412483	98437716
ENSMUST00000125923	4.25502	0.748521	3.20983	0.0731996	0.830383	up	0	0	8	0	0	0	0.0597462	0.0597462	2.16039	0.0597462	0.0597462	0.0597462	Alkbh4	Ensembl	chr5	+	136136157	136140778	1040	exon sense-overlapping	NM_028070	Alkbh4	+	136138780	136141614
AK053585	4.25502	0.748521	3.20983	0.0731996	0.830383	up	0	0	8	0	0	0	0.0597462	0.0597462	2.16039	0.0597462	0.0597462	0.0597462	TUname31001	Genbank	chr14	+	48814420	48815729	1309	intergenic
ENSMUST00000131851	4.25502	0.748521	3.20983	0.0731996	0.830383	up	0	0	8	0	0	0	0.0597462	0.0597462	2.16039	0.0597462	0.0597462	0.0597462	Gm12116	Ensembl	chr11	+	33204054	33221477	2770	natural antisense	NM_023146	Ranbp17	-	33211793	33513746
AK134674	4.25502	0.748521	3.20983	0.0731996	0.830383	up	0	0	8	0	0	0	0.0597462	0.0597462	2.16039	0.0597462	0.0597462	0.0597462	TUname3292	Genbank	chr4	-	105142831	105157971	386	natural antisense	NM_080555	Ppap2b	+	105157346	105232767
ENSMUST00000154409	4.25502	0.748521	3.20983	0.0731996	0.830383	up	0	0	8	0	0	0	0.0597462	0.0597462	2.16039	0.0597462	0.0597462	0.0597462	Gm13985	Ensembl	chr2	-	117806677	117812813	621	intergenic
ENSMUST00000172664	4.25502	0.748521	3.20983	0.0731996	0.830383	up	0	0	8	0	0	0	0.0597462	0.0597462	2.16039	0.0597462	0.0597462	0.0597462	Gm20468	Ensembl	chr17	+	26861442	26897886	452	intergenic
AK138285	4.25502	0.748521	3.20983	0.0731996	0.830383	up	0	0	8	0	0	0	0.0597462	0.0597462	2.16039	0.0597462	0.0597462	0.0597462	TUname1008	Genbank	chr10	+	86953866	86954314	457	natural antisense	uc011xkz.1	Stab2	-	86883299	87007942
ENSMUST00000168897	4.25502	0.748521	3.20983	0.0731996	0.830383	up	0	0	8	0	0	0	0.0597462	0.0597462	2.16039	0.0597462	0.0597462	0.0597462	Gm17103	Ensembl	chr16	-	38569322	38573300	549	natural antisense	NM_001205287	Tmem39a	+	38562813	38592162
AK136720	4.25502	0.748521	3.20983	0.0731996	0.830383	up	0	0	8	0	0	0	0.0597462	0.0597462	2.16039	0.0597462	0.0597462	0.0597462	TUname25952	Genbank	chr11	+	69881091	69881905	816	natural antisense	uc007jse.1	Acap1	-	69881566	69884690
ENSMUST00000150570	4.25502	0.748521	3.20983	0.0731996	0.830383	up	0	0	8	0	0	0	0.0597462	0.0597462	2.16039	0.0597462	0.0597462	0.0597462	Enpp1	Ensembl	chr10	-	24647770	24711997	2503	exon sense-overlapping	ENSMUST00000135846	Enpp1	-	24641805	24711991
ENSMUST00000146991	4.25502	0.748521	3.20983	0.0731996	0.830383	up	0	0	8	0	0	0	0.0597462	0.0597462	2.16039	0.0597462	0.0597462	0.0597462	Npr1	Ensembl	chr3	-	90457398	90458939	643	exon sense-overlapping	NM_008727	Npr1	-	90450591	90465866
AK006675	4.25502	0.748521	3.20983	0.0731996	0.830383	up	0	0	8	0	0	0	0.0597462	0.0597462	2.16039	0.0597462	0.0597462	0.0597462	TUname32195	Genbank	chr4	+	133672718	133673237	520	bidirectional	NM_001145955	Pigv	-	133661424	133672647
ENSMUST00000135313	4.25502	0.748521	3.20983	0.0731996	0.830383	up	0	0	8	0	0	0	0.0597462	0.0597462	2.16039	0.0597462	0.0597462	0.0597462	4933421A08Rik	Ensembl	chr4	+	122961308	122963475	1638	bidirectional	NM_029662	Mfsd2a	-	122946850	122961188
ENSMUST00000183522	4.25502	0.748521	3.20983	0.0731996	0.830383	up	0	0	8	0	0	0	0.0597462	0.0597462	2.16039	0.0597462	0.0597462	0.0597462	RP23-131O4.2	Ensembl	chr14	+	48670158	48719823	866	intergenic
ENSMUST00000118067	4.25502	0.748521	3.20983	0.0731996	0.830383	up	0	0	8	0	0	0	0.0597462	0.0597462	2.16039	0.0597462	0.0597462	0.0597462	Gm11380	Ensembl	chr13	+	31884224	31885224	1000	intronic antisense	NM_146041	Gmds	-	31819585	32338544
ENSMUST00000147294	4.25502	0.748521	3.20983	0.0731996	0.830383	up	0	0	8	0	0	0	0.0597462	0.0597462	2.16039	0.0597462	0.0597462	0.0597462	C130021I20Rik	Ensembl	chr2	+	33641330	33646354	3693	bidirectional	ENSMUST00000176067	Lmx1b	-	33564324	33640480
BB023324	4.25502	0.748521	3.20983	0.0731996	0.830383	up	0	0	8	0	0	0	0.0597462	0.0597462	2.16039	0.0597462	0.0597462	0.0597462	TUname63411	Genbank	chrX	-	11662162	11690246	623	intergenic
TCONS_00017474	4.25502	0.748521	3.20983	0.0731996	0.830383	up	0	0	8	0	0	0	0.0597462	0.0597462	2.16039	0.0597462	0.0597462	0.0597462	XLOC_013451	Alexander et al 2013	chr2	+	147447283	147480167	211	intergenic
ENSMUST00000133879	4.25502	0.748521	3.20983	0.0731996	0.830383	up	0	0	8	0	0	0	0.0597462	0.0597462	2.16039	0.0597462	0.0597462	0.0597462	Ces1f	Ensembl	chr8	-	93273923	93275346	439	exon sense-overlapping	NM_144930	Ces1f	-	93256235	93279736
ENSMUST00000176891	4.25502	0.748521	3.20983	0.0731996	0.830383	up	0	0	8	0	0	0	0.0597462	0.0597462	2.16039	0.0597462	0.0597462	0.0597462	Vmn1r-ps21	Ensembl	chr6	-	58455068	58455993	925	intergenic
uc007gkn.1	4.25502	0.748521	3.20983	0.0731996	0.830383	up	0	0	8	0	0	0	0.0597462	0.0597462	2.16039	0.0597462	0.0597462	0.0597462	AK082148	UCSC_knowngene	chr10	-	83992727	84004860	2727	intergenic
TCONS_00032336	4.24449	0.712433	3.17964	0.0745637	0.830383	up	0	4	3	0	0	0	0.0597462	1.69872	1.21897	0.0597462	0.0597462	0.0597462	XLOC_023899	Alexander et al 2013	chr8	+	89095012	89131075	1397	intergenic
uc008ane.1	4.24449	0.712433	3.17964	0.0745637	0.830383	up	0	4	3	0	0	0	0.0597462	1.69872	1.21897	0.0597462	0.0597462	0.0597462	AK004434	UCSC_knowngene	chr17	-	14937842	14943077	1881	intron sense-overlapping	NM_175173	Wdr27	-	14818671	14943124
ENSMUST00000181122	4.24449	0.712433	3.17964	0.0745637	0.830383	up	0	4	3	0	0	0	0.0597462	1.69872	1.21897	0.0597462	0.0597462	0.0597462	4833422M21Rik	Ensembl	chr15	-	96231869	96240588	1224	intergenic
ENSMUST00000131065	4.24087	0.710792	3.17462	0.074793	0.830383	up	3	0	4	0	0	0	1.49196	0.0597462	1.46274	0.0597462	0.0597462	0.0597462	Fhdc1	Ensembl	chr3	-	84474522	84478982	288	exon sense-overlapping	NM_001033301	Fhdc1	-	84442195	84480439
ENSMUST00000140710	4.2286	0.708595	3.16098	0.0754201	0.830383	up	2	1	4	0	0	0	1.15223	0.671968	1.46274	0.0597462	0.0597462	0.0597462	Ywhaq	Ensembl	chr12	-	21395569	21417130	703	exon sense-overlapping	NM_011739	Ywhaq	-	21390328	21417436
AK034168	4.22755	1.74536	6.53154	0.010599	0.830383	up	0	17	9	1	0	0	0.0597462	3.37971	2.29245	0.626355	0.0597462	0.0597462	TUname56249	Genbank	chr3	+	16447092	16451557	4466	intergenic
ENSMUST00000086502	4.22642	0.670906	3.13734	0.0765208	0.830383	up	6	0	0	0	0	0	2.19633	0.0597462	0.0597462	0.0597462	0.0597462	0.0597462	Tnnt1	Ensembl	chr7	-	4504785	4508025	485	exon sense-overlapping	ENSMUST00000166268	Tnnt1	-	4507567	4515961
AK086004	4.22642	0.670906	3.13734	0.0765208	0.830383	up	6	0	0	0	0	0	2.19633	0.0597462	0.0597462	0.0597462	0.0597462	0.0597462	TUname45725	Genbank	chr15	-	85147198	85148151	953	intergenic
ENSMUST00000134163	4.22642	0.670906	3.13734	0.0765208	0.830383	up	6	0	0	0	0	0	2.19633	0.0597462	0.0597462	0.0597462	0.0597462	0.0597462	Wnt5a	Ensembl	chr14	+	28511389	28523517	2147	exon sense-overlapping	NM_001256224	Wnt5a	+	28511404	28525515
ENSMUST00000117158	4.22642	0.670906	3.13734	0.0765208	0.830383	up	6	0	0	0	0	0	2.19633	0.0597462	0.0597462	0.0597462	0.0597462	0.0597462	Gm15370	Ensembl	chr1	+	88129580	88129833	253	intron sense-overlapping	NM_201642	Ugt1a7c	+	88095000	88220002
ENSMUST00000152484	4.22642	0.670906	3.13734	0.0765208	0.830383	up	6	0	0	0	0	0	2.19633	0.0597462	0.0597462	0.0597462	0.0597462	0.0597462	Rdm1	Ensembl	chr11	+	101627194	101630900	434	exon sense-overlapping	NM_025654	Rdm1	+	101627948	101636081
uc008uda.1	4.22642	0.670906	3.13734	0.0765208	0.830383	up	6	0	0	0	0	0	2.19633	0.0597462	0.0597462	0.0597462	0.0597462	0.0597462	Elavl4	UCSC_knowngene	chr4	-	110251280	110292787	394	exon sense-overlapping	ENSMUST00000153906	Elavl4	-	110226608	110287527
ENSMUST00000113538	4.22642	0.670906	3.13734	0.0765208	0.830383	up	6	0	0	0	0	0	2.19633	0.0597462	0.0597462	0.0597462	0.0597462	0.0597462	Gm14825	Ensembl	chrX	+	94330970	94331671	701	intergenic
BY733216	4.22642	0.670906	3.13734	0.0765208	0.830383	up	6	0	0	0	0	0	2.19633	0.0597462	0.0597462	0.0597462	0.0597462	0.0597462	TUname63795	Genbank	chr5	+	3301409	3306001	698	intergenic
uc007wuy.2	4.22642	0.670906	3.13734	0.0765208	0.830383	up	6	0	0	0	0	0	2.19633	0.0597462	0.0597462	0.0597462	0.0597462	0.0597462	DQ703718	UCSC_knowngene	chr15	+	79928131	79928161	30	intronic antisense	ENSMUST00000089293	Cbx7	-	79915809	79932639
AK041817	4.22642	0.670906	3.13734	0.0765208	0.830383	up	6	0	0	0	0	0	2.19633	0.0597462	0.0597462	0.0597462	0.0597462	0.0597462	TUname17812	Genbank	chr8	+	77282860	77286207	1638	intronic antisense	uc009mhn.1	Arhgap10	-	77250365	77517907
TCONS_00000107	4.22642	0.670906	3.13734	0.0765208	0.830383	up	6	0	0	0	0	0	2.19633	0.0597462	0.0597462	0.0597462	0.0597462	0.0597462	XLOC_000353	Alexander et al 2013	chr1	+	93168454	93207009	4282	intergenic
ENSMUST00000118589	4.22642	0.670906	3.13734	0.0765208	0.830383	up	6	0	0	0	0	0	2.19633	0.0597462	0.0597462	0.0597462	0.0597462	0.0597462	Gm15568	Ensembl	chr10	+	10343114	10344327	1213	intronic antisense	ENSMUST00000172530	Adgb	-	10335708	10472326
ENSMUST00000141893	4.22642	0.670906	3.13734	0.0765208	0.830383	up	6	0	0	0	0	0	2.19633	0.0597462	0.0597462	0.0597462	0.0597462	0.0597462	3010003L10Rik	Ensembl	chr4	-	109976737	109977813	691	bidirectional	NM_172296	Dmrta2	+	109978024	109983684
ENSMUST00000084713	4.22642	0.670906	3.13734	0.0765208	0.830383	up	6	0	0	0	0	0	2.19633	0.0597462	0.0597462	0.0597462	0.0597462	0.0597462	Gm10475	Ensembl	chr5	+	21910930	21954014	1796	natural antisense	uc008wpi.1	Reln	-	21884453	22344705
NR_027989	4.22642	0.670906	3.13734	0.0765208	0.830383	up	6	0	0	0	0	0	2.19633	0.0597462	0.0597462	0.0597462	0.0597462	0.0597462	Gm9871	RefSeq	chr6	+	101774248	101801982	1560	exon sense-overlapping	ENSMUST00000064002	Gm9871	+	101796224	101801610
uc009edw.1	4.22642	0.670906	3.13734	0.0765208	0.830383	up	6	0	0	0	0	0	2.19633	0.0597462	0.0597462	0.0597462	0.0597462	0.0597462	DQ568996	UCSC_knowngene	chr6	+	128445256	128445286	30	intergenic
ENSMUST00000156344	4.22642	0.670906	3.13734	0.0765208	0.830383	up	6	0	0	0	0	0	2.19633	0.0597462	0.0597462	0.0597462	0.0597462	0.0597462	Abi1	Ensembl	chr2	-	22946682	22960852	503	exon sense-overlapping	ENSMUST00000178908	Abi1	-	22941232	23040219
ENSMUST00000119775	4.22642	0.670906	3.13734	0.0765208	0.830383	up	6	0	0	0	0	0	2.19633	0.0597462	0.0597462	0.0597462	0.0597462	0.0597462	Gm6506	Ensembl	chr15	-	77443284	77444420	1136	intron sense-overlapping	NM_001024848	Apol7b	-	77422208	77447460
AK156366	4.22642	0.670906	3.13734	0.0765208	0.830383	up	6	0	0	0	0	0	2.19633	0.0597462	0.0597462	0.0597462	0.0597462	0.0597462	TUname49366	Genbank	chr11	+	57431697	57432851	1156	intergenic
AK157400	4.22642	0.670906	3.13734	0.0765208	0.830383	up	6	0	0	0	0	0	2.19633	0.0597462	0.0597462	0.0597462	0.0597462	0.0597462	TUname6311	Genbank	chr17	+	71925231	71927030	1764	intronic antisense	NM_007439	Alk	-	71868987	72604307
AK089607	4.22642	0.670906	3.13734	0.0765208	0.830383	up	6	0	0	0	0	0	2.19633	0.0597462	0.0597462	0.0597462	0.0597462	0.0597462	TUname32873	Genbank	chr12	+	35746228	35748247	2020	intergenic
TCONS_00036136	4.22642	0.670906	3.13734	0.0765208	0.830383	up	6	0	0	0	0	0	2.19633	0.0597462	0.0597462	0.0597462	0.0597462	0.0597462	XLOC_026933	Alexander et al 2013	chrX	-	18395569	18402322	462	intergenic
AK132995	4.22642	0.670906	3.13734	0.0765208	0.830383	up	6	0	0	0	0	0	2.19633	0.0597462	0.0597462	0.0597462	0.0597462	0.0597462	TUname30746	Genbank	chr3	-	57696179	57697476	1299	intergenic
ENSMUST00000149611	4.22642	0.670906	3.13734	0.0765208	0.830383	up	6	0	0	0	0	0	2.19633	0.0597462	0.0597462	0.0597462	0.0597462	0.0597462	Car10	Ensembl	chr11	+	93098027	93099866	303	exon sense-overlapping	ENSMUST00000092780	Car10	+	93099289	93185969
ENSMUST00000181127	4.22642	0.670906	3.13734	0.0765208	0.830383	up	6	0	0	0	0	0	2.19633	0.0597462	0.0597462	0.0597462	0.0597462	0.0597462	Gm26879	Ensembl	chr1	+	192092371	192099630	1163	natural antisense	ENSMUST00000085573	Traf5	-	191997429	192092559
ENSMUST00000139991	4.22642	0.670906	3.13734	0.0765208	0.830383	up	6	0	0	0	0	0	2.19633	0.0597462	0.0597462	0.0597462	0.0597462	0.0597462	Stc2	Ensembl	chr11	-	31357985	31369103	3982	exon sense-overlapping	NM_011491	Stc2	-	31359440	31370061
TCONS_00036158	4.22642	0.670906	3.13734	0.0765208	0.830383	up	6	0	0	0	0	0	2.19633	0.0597462	0.0597462	0.0597462	0.0597462	0.0597462	XLOC_026978	Alexander et al 2013	chrX	-	36186592	36194878	376	intergenic
ENSMUST00000155982	4.22642	0.670906	3.13734	0.0765208	0.830383	up	6	0	0	0	0	0	2.19633	0.0597462	0.0597462	0.0597462	0.0597462	0.0597462	Gm16143	Ensembl	chr10	-	63055602	63057467	538	natural antisense	NM_026085	Pbld2	+	63024511	63058812
ENSMUST00000153589	4.22642	0.670906	3.13734	0.0765208	0.830383	up	6	0	0	0	0	0	2.19633	0.0597462	0.0597462	0.0597462	0.0597462	0.0597462	2610028E06Rik	Ensembl	chr4	-	125890414	125917171	867	intergenic
ENSMUST00000006415	4.22642	0.670906	3.13734	0.0765208	0.830383	up	6	0	0	0	0	0	2.19633	0.0597462	0.0597462	0.0597462	0.0597462	0.0597462	Plcb2	Ensembl	chr2	-	118714232	118728391	2456	exon sense-overlapping	ENSMUST00000159756	Plcb2	-	118707995	118728359
AK132130	4.22642	0.670906	3.13734	0.0765208	0.830383	up	6	0	0	0	0	0	2.19633	0.0597462	0.0597462	0.0597462	0.0597462	0.0597462	TUname32374	Genbank	chr6	+	50909769	50910735	969	intergenic
uc009cib.1	4.22642	0.670906	3.13734	0.0765208	0.830383	up	6	0	0	0	0	0	2.19633	0.0597462	0.0597462	0.0597462	0.0597462	0.0597462	AK039589	UCSC_knowngene	chr6	+	72162848	72167707	400	intergenic
AK018489	4.22642	0.670906	3.13734	0.0765208	0.830383	up	6	0	0	0	0	0	2.19633	0.0597462	0.0597462	0.0597462	0.0597462	0.0597462	TUname35332	Genbank	chr2	+	53877773	53879480	1708	intergenic
TCONS_00008473	4.22642	0.670906	3.13734	0.0765208	0.830383	up	6	0	0	0	0	0	2.19633	0.0597462	0.0597462	0.0597462	0.0597462	0.0597462	XLOC_006958	Alexander et al 2013	chr13	-	119271523	119278732	307	intergenic
ENSMUST00000154073	4.22642	0.670906	3.13734	0.0765208	0.830383	up	6	0	0	0	0	0	2.19633	0.0597462	0.0597462	0.0597462	0.0597462	0.0597462	Pih1d1	Ensembl	chr7	+	45158847	45159816	484	exon sense-overlapping	ENSMUST00000085375	Pih1d1	+	45154313	45160064
uc008oxw.1	4.22642	0.670906	3.13734	0.0765208	0.830383	up	6	0	0	0	0	0	2.19633	0.0597462	0.0597462	0.0597462	0.0597462	0.0597462	DQ711745	UCSC_knowngene	chr3	+	34872922	34872952	30	intergenic
ENSMUST00000118082	4.22642	0.670906	3.13734	0.0765208	0.830383	up	6	0	0	0	0	0	2.19633	0.0597462	0.0597462	0.0597462	0.0597462	0.0597462	Naip3	Ensembl	chr13	-	100339484	100378960	4867	intergenic
NR_003107	4.22642	0.670906	3.13734	0.0765208	0.830383	up	6	0	0	0	0	0	2.19633	0.0597462	0.0597462	0.0597462	0.0597462	0.0597462	Gm9731	RefSeq	chr8	+	27296044	27297200	1156	intergenic
TCONS_00022526	4.22307	1.78212	6.69285	0.00968115	0.830383	up	0	17	10	0	0	1	0.0597462	3.37971	2.41342	0.0597462	0.0597462	0.718048	XLOC_016323	Alexander et al 2013	chr4	+	11845119	11861232	4279	intergenic
ENSMUST00000174327	4.21626	0.706398	3.14732	0.076054	0.830383	up	1	2	4	0	0	0	0.707016	1.10044	1.46274	0.0597462	0.0597462	0.0597462	Banp	Ensembl	chr8	+	121991457	121997238	445	exon sense-overlapping	ENSMUST00000170857	Banp	+	121950543	122029258
ENSMUST00000126723	4.21626	0.706398	3.14732	0.076054	0.830383	up	1	2	4	0	0	0	0.707016	1.10044	1.46274	0.0597462	0.0597462	0.0597462	Pcyt2	Ensembl	chr11	-	120613029	120617913	701	exon sense-overlapping	ENSMUST00000106188	Pcyt2	-	120610416	120617925
ENSMUST00000140371	4.21378	0.668652	3.12317	0.077189	0.830383	up	5	1	0	0	0	0	1.99747	0.671968	0.0597462	0.0597462	0.0597462	0.0597462	2010012P19Rik	Ensembl	chr11	+	69684328	69691141	816	natural antisense	ENSMUST00000108648	Tnfsf13	-	69682931	69685784
ENSMUST00000147851	4.20387	0.704202	3.13364	0.0766947	0.830383	up	0	3	4	0	0	0	0.0597462	1.43038	1.46274	0.0597462	0.0597462	0.0597462	Ube2o	Ensembl	chr11	-	116545750	116548841	461	exon sense-overlapping	NM_173755	Ube2o	-	116537752	116581447
ENSMUST00000167064	4.20387	0.704202	3.13364	0.0766947	0.830383	up	0	3	4	0	0	0	0.0597462	1.43038	1.46274	0.0597462	0.0597462	0.0597462	Catsperg1	Ensembl	chr7	-	29208833	29214020	1097	exon sense-overlapping	NM_001164658	Catsperg1	-	29181531	29214033
2_00021278	4.20387	0.704202	3.13364	0.0766947	0.830383	up	0	3	4	0	0	0	0.0597462	1.43038	1.46274	0.0597462	0.0597462	0.0597462	2610002J02Rik	Lei Sun et al 2012	chr4	+	155252299	155256687	574	exon sense-overlapping	ENSMUST00000143709	2610002J02Rik	+	155250331	155256418
ENSMUST00000123578	4.20106	0.666399	3.10896	0.0778649	0.830383	up	4	2	0	0	0	0	1.76674	1.10044	0.0597462	0.0597462	0.0597462	0.0597462	Wasf2	Ensembl	chr4	+	133176000	133176612	223	exon sense-overlapping	NM_153423	Wasf2	+	133130632	133198330
TCONS_00010756	4.20106	0.666399	3.10896	0.0778649	0.830383	up	4	2	0	0	0	0	1.76674	1.10044	0.0597462	0.0597462	0.0597462	0.0597462	TUname9039	Alexander et al 2013	chr15	+	6989352	6993286	75	intergenic
CF728761	4.20106	0.666399	3.10896	0.0778649	0.830383	up	4	2	0	0	0	0	1.76674	1.10044	0.0597462	0.0597462	0.0597462	0.0597462	TUname63908	Genbank	chr6	-	51844615	51845281	666	intergenic
AK076627	4.18827	0.664147	3.09473	0.0785485	0.830383	up	3	3	0	0	0	0	1.49196	1.43038	0.0597462	0.0597462	0.0597462	0.0597462	TUname52673	Genbank	chr10	+	99759505	99830582	1667	natural antisense	NM_027945	Csl	-	99757704	99759658
uc029ust.1	4.18827	0.664147	3.09473	0.0785485	0.830383	up	3	3	0	0	0	0	1.49196	1.43038	0.0597462	0.0597462	0.0597462	0.0597462	DQ558043	UCSC_knowngene	chr4	+	42378215	42378248	33	intergenic
TCONS_00007986	4.18763	0.700364	3.11479	0.0775868	0.830383	up	2	0	5	0	0	0	1.15223	0.0597462	1.67121	0.0597462	0.0597462	0.0597462	XLOC_006110	Alexander et al 2013	chr13	+	47921806	47923861	583	intergenic
ENSMUST00000136131	4.17541	0.661896	3.08047	0.0792399	0.830383	up	2	4	0	0	0	0	1.15223	1.69872	0.0597462	0.0597462	0.0597462	0.0597462	Ccl9	Ensembl	chr11	-	83575317	83577142	398	exon sense-overlapping	NM_011338	Ccl9	-	83572916	83578636
ENSMUST00000117439	4.17541	0.661896	3.08047	0.0792399	0.830383	up	2	4	0	0	0	0	1.15223	1.69872	0.0597462	0.0597462	0.0597462	0.0597462	Gm12385	Ensembl	chr4	+	39767617	39768412	795	intergenic
ENSMUST00000138767	4.17151	0.660193	3.07507	0.0795034	0.830383	up	5	0	1	0	0	0	1.99747	0.0597462	0.556593	0.0597462	0.0597462	0.0597462	9530036M11Rik	Ensembl	chr6	-	54146886	54150937	1996	intronic antisense	ENSMUST00000127323	Chn2	+	54040085	54195872
ENSMUST00000147600	4.17151	0.660193	3.07507	0.0795034	0.830383	up	5	0	1	0	0	0	1.99747	0.0597462	0.556593	0.0597462	0.0597462	0.0597462	Crb2	Ensembl	chr2	+	37791170	37793523	1132	exon sense-overlapping	NM_001163566	Crb2	+	37776248	37799103
AK078687	4.16293	2.28457	10.7445	0.0010462	0.321726	up	12	17	13	1	1	0	3.02219	3.37971	2.72528	0.626355	0.621297	0.0597462	TUname21053	Genbank	chr4	+	136639581	136642068	2488	intergenic
uc007rcy.1	4.16248	0.659646	3.06619	0.0799391	0.830383	up	1	5	0	0	0	0	0.707016	1.9249	0.0597462	0.0597462	0.0597462	0.0597462	AK039809	UCSC_knowngene	chr13	+	70706232	70733207	1087	intronic antisense	NM_172053	Adamts16	-	70727807	70841810
AK085542	4.16244	0.695976	3.08727	0.0789096	0.830383	up	0	2	5	0	0	0	0.0597462	1.10044	1.67121	0.0597462	0.0597462	0.0597462	TUname29214	Genbank	chr9	-	123592788	123593711	923	intergenic
ENSMUST00000126270	4.16244	0.695976	3.08727	0.0789096	0.830383	up	0	2	5	0	0	0	0.0597462	1.10044	1.67121	0.0597462	0.0597462	0.0597462	Gm12648	Ensembl	chr4	-	94089575	94425588	656	intergenic
AK158947	4.15947	1.68869	6.05674	0.0138546	0.830383	up	14	1	9	1	0	0	3.21789	0.671968	2.29245	0.626355	0.0597462	0.0597462	TUname15135	Genbank	chr17	+	45865079	45866979	1900	intergenic
AK039205	4.15854	0.657943	3.06076	0.0802068	0.830383	up	4	1	1	0	0	0	1.76674	0.671968	0.556593	0.0597462	0.0597462	0.0597462	TUname25643	Genbank	chr15	+	9626161	9629393	3232	intronic antisense	uc029sns.1	Spef2	-	9578261	9748806
ENSMUST00000183002	4.15854	0.657943	3.06076	0.0802068	0.830383	up	4	1	1	0	0	0	1.76674	0.671968	0.556593	0.0597462	0.0597462	0.0597462	Anks1b	Ensembl	chr10	+	89996542	90033279	226	exon sense-overlapping	ENSMUST00000183156	Anks1b	+	89873508	90970219
ENSMUST00000065857	4.15854	0.657943	3.06076	0.0802068	0.830383	up	4	1	1	0	0	0	1.76674	0.671968	0.556593	0.0597462	0.0597462	0.0597462	Mbtps2	Ensembl	chrX	-	157535370	157569005	1737	exon sense-overlapping	ENSMUST00000179062	Yy2	-	157565946	157598650
NR_045428	4.14947	0.657397	3.05188	0.0806463	0.830383	up	0	6	0	0	0	0	0.0597462	2.12037	0.0597462	0.0597462	0.0597462	0.0597462	2410021H03Rik	RefSeq	chr17	-	69275361	69277206	762	intronic antisense	ENSMUST00000112680	Epb4.1l3	+	69156809	69289985
ENSMUST00000140002	4.14947	0.657397	3.05188	0.0806463	0.830383	up	0	6	0	0	0	0	0.0597462	2.12037	0.0597462	0.0597462	0.0597462	0.0597462	Sh3bp5	Ensembl	chr14	-	31359879	31436078	1686	exon sense-overlapping	ENSMUST00000100730	Sh3bp5	-	31373784	31417677
AK080174	4.14947	0.657397	3.05188	0.0806463	0.830383	up	0	6	0	0	0	0	0.0597462	2.12037	0.0597462	0.0597462	0.0597462	0.0597462	TUname23691	Genbank	chr18	+	14683024	14683780	757	bidirectional	NM_001161371	Ss18	-	14625628	14682914
ENSMUST00000162361	4.14947	0.657397	3.05188	0.0806463	0.830383	up	0	6	0	0	0	0	0.0597462	2.12037	0.0597462	0.0597462	0.0597462	0.0597462	Vangl1	Ensembl	chr3	-	102163362	102165940	472	exon sense-overlapping	ENSMUST00000161021	Vangl1	-	102158179	102166930
ENSMUST00000124174	4.14947	0.657397	3.05188	0.0806463	0.830383	up	0	6	0	0	0	0	0.0597462	2.12037	0.0597462	0.0597462	0.0597462	0.0597462	Asf1b	Ensembl	chr8	+	83965046	83968545	812	exon sense-overlapping	NM_024184	Asf1b	+	83955693	83970195
ENSMUST00000152628	4.14947	0.657397	3.05188	0.0806463	0.830383	up	0	6	0	0	0	0	0.0597462	2.12037	0.0597462	0.0597462	0.0597462	0.0597462	Gm16129	Ensembl	chr3	+	63843115	63844069	486	intronic antisense	ENSMUST00000159188	Plch1	-	63781376	63899442
ENSMUST00000134150	4.14947	0.657397	3.05188	0.0806463	0.830383	up	0	6	0	0	0	0	0.0597462	2.12037	0.0597462	0.0597462	0.0597462	0.0597462	Batf2	Ensembl	chr19	+	6140982	6172473	1584	exon sense-overlapping	uc008ghp.1	Batf2	+	6164457	6172471
AK015479	4.14947	0.657397	3.05188	0.0806463	0.830383	up	0	6	0	0	0	0	0.0597462	2.12037	0.0597462	0.0597462	0.0597462	0.0597462	TUname29053	Genbank	chr10	+	126693433	126694537	1103	intergenic
ENSMUST00000150166	4.14947	0.657397	3.05188	0.0806463	0.830383	up	0	6	0	0	0	0	0.0597462	2.12037	0.0597462	0.0597462	0.0597462	0.0597462	Tnni3	Ensembl	chr7	-	4521340	4522492	763	exon sense-overlapping	ENSMUST00000154913	Tnni3	-	4520476	4524229
ENSMUST00000155789	4.14947	0.657397	3.05188	0.0806463	0.830383	up	0	6	0	0	0	0	0.0597462	2.12037	0.0597462	0.0597462	0.0597462	0.0597462	Gm12707	Ensembl	chr4	+	95483955	95487401	489	intergenic
uc007rtb.1	4.14947	0.657397	3.05188	0.0806463	0.830383	up	0	6	0	0	0	0	0.0597462	2.12037	0.0597462	0.0597462	0.0597462	0.0597462	Cenpk	UCSC_knowngene	chr13	+	104228954	104243051	877	exon sense-overlapping	uc007rtf.1	Cenpk	+	104238268	104252392
ENSMUST00000137047	4.14947	0.657397	3.05188	0.0806463	0.830383	up	0	6	0	0	0	0	0.0597462	2.12037	0.0597462	0.0597462	0.0597462	0.0597462	Dlec1	Ensembl	chr9	+	119119653	119144280	3697	exon sense-overlapping	ENSMUST00000140326	Dlec1	+	119102477	119148246
AK015134	4.14947	0.657397	3.05188	0.0806463	0.830383	up	0	6	0	0	0	0	0.0597462	2.12037	0.0597462	0.0597462	0.0597462	0.0597462	TUname13424	Genbank	chr1	+	167466017	167468012	1996	natural antisense	NM_001013382	Lrrc52	-	167445674	167466780
uc012ddv.2	4.14947	0.657397	3.05188	0.0806463	0.830383	up	0	6	0	0	0	0	0.0597462	2.12037	0.0597462	0.0597462	0.0597462	0.0597462	AB345950	UCSC_knowngene	chr4	+	47100998	47101024	26	intron sense-overlapping	NM_172693	Galnt12	+	47091952	47123042
ENSMUST00000181345	4.14947	0.657397	3.05188	0.0806463	0.830383	up	0	6	0	0	0	0	0.0597462	2.12037	0.0597462	0.0597462	0.0597462	0.0597462	4930445N18Rik	Ensembl	chr18	+	82855893	82870604	1033	intergenic
AK084053	4.14947	0.657397	3.05188	0.0806463	0.830383	up	0	6	0	0	0	0	0.0597462	2.12037	0.0597462	0.0597462	0.0597462	0.0597462	TUname4908	Genbank	chr5	+	131308044	131308497	456	natural antisense	ENSMUST00000160609	Wbscr17	-	130963675	131308076
ENSMUST00000153749	4.14947	0.657397	3.05188	0.0806463	0.830383	up	0	6	0	0	0	0	0.0597462	2.12037	0.0597462	0.0597462	0.0597462	0.0597462	Smyd5	Ensembl	chr6	+	85442572	85445432	613	exon sense-overlapping	NM_144918	Smyd5	+	85431975	85446429
ENSMUST00000162902	4.14947	0.657397	3.05188	0.0806463	0.830383	up	0	6	0	0	0	0	0.0597462	2.12037	0.0597462	0.0597462	0.0597462	0.0597462	Gm15950	Ensembl	chr16	-	13919426	13921399	1973	intronic antisense	ENSMUST00000128757	Mpv17l	+	13903160	13949619
ENSMUST00000135220	4.14947	0.657397	3.05188	0.0806463	0.830383	up	0	6	0	0	0	0	0.0597462	2.12037	0.0597462	0.0597462	0.0597462	0.0597462	Timm50	Ensembl	chr7	-	28310216	28312056	394	exon sense-overlapping	NM_025616	Timm50	-	28305825	28312046
ENSMUST00000167317	4.14947	0.657397	3.05188	0.0806463	0.830383	up	0	6	0	0	0	0	0.0597462	2.12037	0.0597462	0.0597462	0.0597462	0.0597462	Rgs1	Ensembl	chr1	-	144243971	144249059	2323	exon sense-overlapping	NM_015811	Rgs1	-	144244668	144249104
ENSMUST00000140590	4.14947	0.657397	3.05188	0.0806463	0.830383	up	0	6	0	0	0	0	0.0597462	2.12037	0.0597462	0.0597462	0.0597462	0.0597462	Entpd2	Ensembl	chr2	+	25398752	25399849	495	exon sense-overlapping	NM_009849	Entpd2	+	25395873	25401323
ENSMUST00000156631	4.14947	0.657397	3.05188	0.0806463	0.830383	up	0	6	0	0	0	0	0.0597462	2.12037	0.0597462	0.0597462	0.0597462	0.0597462	Gpr98	Ensembl	chr13	-	81106941	81342836	815	exon sense-overlapping	ENSMUST00000128120	Gpr98	-	81095067	81343315
AK144940	4.14947	0.657397	3.05188	0.0806463	0.830383	up	0	6	0	0	0	0	0.0597462	2.12037	0.0597462	0.0597462	0.0597462	0.0597462	TUname28222	Genbank	chr3	+	138103913	138115662	1758	natural antisense	ENSMUST00000098580	Mttp	-	138089854	138143388
AK020362	4.14947	0.657397	3.05188	0.0806463	0.830383	up	0	6	0	0	0	0	0.0597462	2.12037	0.0597462	0.0597462	0.0597462	0.0597462	TUname14250	Genbank	chr18	-	12501189	12504426	1086	natural antisense	uc008ech.1	Lama3	+	12504198	12583012
AK157753	4.14947	0.657397	3.05188	0.0806463	0.830383	up	0	6	0	0	0	0	0.0597462	2.12037	0.0597462	0.0597462	0.0597462	0.0597462	TUname47343	Genbank	chr6	+	30599657	30600900	1243	intergenic
AK137845	4.14947	0.657397	3.05188	0.0806463	0.830383	up	0	6	0	0	0	0	0.0597462	2.12037	0.0597462	0.0597462	0.0597462	0.0597462	TUname9659	Genbank	chr14	+	106228798	106231081	2283	intergenic
AK017190	4.14947	0.657397	3.05188	0.0806463	0.830383	up	0	6	0	0	0	0	0.0597462	2.12037	0.0597462	0.0597462	0.0597462	0.0597462	TUname49105	Genbank	chr12	+	108878768	108879416	651	intronic antisense	NM_011710	Wars	-	108860029	108893211
ENSMUST00000138125	4.14947	0.657397	3.05188	0.0806463	0.830383	up	0	6	0	0	0	0	0.0597462	2.12037	0.0597462	0.0597462	0.0597462	0.0597462	Rhbdf2	Ensembl	chr11	-	116601085	116602595	815	exon sense-overlapping	NM_001167680	Rhbdf2	-	116598165	116624252
TCONS_00029162	4.14947	0.657397	3.05188	0.0806463	0.830383	up	0	6	0	0	0	0	0.0597462	2.12037	0.0597462	0.0597462	0.0597462	0.0597462	XLOC_021799	Alexander et al 2013	chr7	+	100330693	100341843	627	intronic antisense	NM_028292	Ppme1	-	100326736	100371896
ENSMUST00000181721	4.14947	0.657397	3.05188	0.0806463	0.830383	up	0	6	0	0	0	0	0.0597462	2.12037	0.0597462	0.0597462	0.0597462	0.0597462	Rmi2	Ensembl	chr16	+	10835067	10892966	1076	exon sense-overlapping	NM_001162932	Rmi2	+	10835058	10843235
ENSMUST00000145789	4.14947	0.657397	3.05188	0.0806463	0.830383	up	0	6	0	0	0	0	0.0597462	2.12037	0.0597462	0.0597462	0.0597462	0.0597462	Gm11999	Ensembl	chr11	-	11642202	11685400	813	intronic antisense	ENSMUST00000126058	Ikzf1	+	11685002	11754083
AK137908	4.14947	0.657397	3.05188	0.0806463	0.830383	up	0	6	0	0	0	0	0.0597462	2.12037	0.0597462	0.0597462	0.0597462	0.0597462	TUname27114	Genbank	chr1	+	87599681	87600960	1281	intergenic
ENSMUST00000143302	4.14947	0.657397	3.05188	0.0806463	0.830383	up	0	6	0	0	0	0	0.0597462	2.12037	0.0597462	0.0597462	0.0597462	0.0597462	Gm11521	Ensembl	chr11	-	95336010	95337408	329	natural antisense	NM_172543	Fam117a	+	95337017	95381872
AK054165	4.14947	0.657397	3.05188	0.0806463	0.830383	up	0	6	0	0	0	0	0.0597462	2.12037	0.0597462	0.0597462	0.0597462	0.0597462	TUname46524	Genbank	chr2	+	170888237	170889161	925	intergenic
TCONS_00009564	4.14947	0.657397	3.05188	0.0806463	0.830383	up	0	6	0	0	0	0	0.0597462	2.12037	0.0597462	0.0597462	0.0597462	0.0597462	XLOC_007359	Alexander et al 2013	chr14	+	76663203	76687094	480	intergenic
ENSMUST00000162312	4.14947	0.657397	3.05188	0.0806463	0.830383	up	0	6	0	0	0	0	0.0597462	2.12037	0.0597462	0.0597462	0.0597462	0.0597462	Parp4	Ensembl	chr14	+	56655334	56659792	835	exon sense-overlapping	NM_001145978	Parp4	+	56575618	56659798
TCONS_00025292	4.14947	0.657397	3.05188	0.0806463	0.830383	up	0	6	0	0	0	0	0.0597462	2.12037	0.0597462	0.0597462	0.0597462	0.0597462	XLOC_019260	Alexander et al 2013	chr5	-	104579764	104644907	8175	intronic antisense	uc008ykq.1	AK049668	+	104582824	104584620
AK013581	4.14947	0.657397	3.05188	0.0806463	0.830383	up	0	6	0	0	0	0	0.0597462	2.12037	0.0597462	0.0597462	0.0597462	0.0597462	TUname38521	Genbank	chr13	-	6925282	6925851	569	intergenic
AK144827	4.14947	0.657397	3.05188	0.0806463	0.830383	up	0	6	0	0	0	0	0.0597462	2.12037	0.0597462	0.0597462	0.0597462	0.0597462	TUname36845	Genbank	chr10	+	53409881	53424272	1857	intergenic
BY675255	4.14947	0.657397	3.05188	0.0806463	0.830383	up	0	6	0	0	0	0	0.0597462	2.12037	0.0597462	0.0597462	0.0597462	0.0597462	TUname63771	Genbank	chr13	-	110770030	110770394	367	intergenic
ENSMUST00000124835	4.14549	0.655693	3.04641	0.0809181	0.830383	up	3	2	1	0	0	0	1.49196	1.10044	0.556593	0.0597462	0.0597462	0.0597462	Tmco4	Ensembl	chr4	+	138972908	139036634	1992	exon sense-overlapping	ENSMUST00000043042	Tmco4	+	138972891	139059171
ENSMUST00000174621	4.13305	0.689946	3.05439	0.0805215	0.830383	up	1	0	6	0	0	0	0.707016	0.0597462	1.85333	0.0597462	0.0597462	0.0597462	Gm20500	Ensembl	chr5	+	92736204	92737442	321	intron sense-overlapping	NM_015756	Shroom3	+	92683434	92965759
ENSMUST00000130727	4.13305	0.689946	3.05439	0.0805215	0.830383	up	1	0	6	0	0	0	0.707016	0.0597462	1.85333	0.0597462	0.0597462	0.0597462	Sp110	Ensembl	chr1	-	85597717	85598779	830	exon sense-overlapping	uc007bua.2	Sp110	-	85576898	85598810
uc007roe.1	4.13305	0.689946	3.05439	0.0805215	0.830383	up	1	0	6	0	0	0	0.707016	0.0597462	1.85333	0.0597462	0.0597462	0.0597462	AK050283	UCSC_knowngene	chr13	+	97376233	97380465	935	intergenic
ENSMUST00000182928	4.13305	0.689946	3.05439	0.0805215	0.830383	up	1	0	6	0	0	0	0.707016	0.0597462	1.85333	0.0597462	0.0597462	0.0597462	Gm4960	Ensembl	chr5	-	7399361	7400362	1001	intergenic
ENSMUST00000182725	4.13305	0.689946	3.05439	0.0805215	0.830383	up	1	0	6	0	0	0	0.707016	0.0597462	1.85333	0.0597462	0.0597462	0.0597462	Oas1b	Ensembl	chr5	+	120812634	120814585	558	exon sense-overlapping	NM_001083925	Oas1b	+	120812637	120824160
ENSMUST00000185132	4.13305	0.689946	3.05439	0.0805215	0.830383	up	1	0	6	0	0	0	0.707016	0.0597462	1.85333	0.0597462	0.0597462	0.0597462	RP23-292F17.6	Ensembl	chr9	-	72179182	72179758	432	intergenic
ENSMUST00000143383	4.12019	0.687754	3.04054	0.0812114	0.830383	up	0	1	6	0	0	0	0.0597462	0.671968	1.85333	0.0597462	0.0597462	0.0597462	Camk2d	Ensembl	chr3	+	126596301	126684688	206	exon sense-overlapping	NM_001025439	Camk2d	+	126596972	126845054
uc029xob.1	4.12019	0.687754	3.04054	0.0812114	0.830383	up	0	1	6	0	0	0	0.0597462	0.671968	1.85333	0.0597462	0.0597462	0.0597462	AB349653	UCSC_knowngene	chrX	+	158742315	158742388	73	intergenic
ENSMUST00000128784	4.12019	0.687754	3.04054	0.0812114	0.830383	up	0	1	6	0	0	0	0.0597462	0.671968	1.85333	0.0597462	0.0597462	0.0597462	Mettl23	Ensembl	chr11	+	116843560	116846133	585	exon sense-overlapping	NM_028865	Mettl23	+	116843514	116849740
ENSMUST00000181207	4.12019	0.687754	3.04054	0.0812114	0.830383	up	0	1	6	0	0	0	0.0597462	0.671968	1.85333	0.0597462	0.0597462	0.0597462	Gm26884	Ensembl	chr15	-	79689139	79692385	3074	natural antisense	NM_013818	Gtpbp1	+	79690895	79721479
AK081037	4.12019	0.687754	3.04054	0.0812114	0.830383	up	0	1	6	0	0	0	0.0597462	0.671968	1.85333	0.0597462	0.0597462	0.0597462	TUname52965	Genbank	chr6	+	40435565	40437167	1604	natural antisense	ENSMUST00000101492	E330009J07Rik	-	40401374	40436135
ENSMUST00000132213	4.12019	0.687754	3.04054	0.0812114	0.830383	up	0	1	6	0	0	0	0.0597462	0.671968	1.85333	0.0597462	0.0597462	0.0597462	Cds1	Ensembl	chr5	+	101806547	101821447	534	exon sense-overlapping	NM_173370	Cds1	+	101765129	101823852
AK040266	4.1195	1.67075	5.86791	0.0154208	0.830383	up	10	3	11	1	0	0	2.79571	1.43038	2.52504	0.626355	0.0597462	0.0597462	TUname34991	Genbank	chr5	-	96052177	96054715	2539	intergenic
ENSMUST00000147908	4.11917	0.651197	3.01765	0.0823651	0.830383	up	1	4	1	0	0	0	0.707016	1.69872	0.556593	0.0597462	0.0597462	0.0597462	Gna15	Ensembl	chr10	-	81502305	81508173	1046	exon sense-overlapping	NM_010304	Gna15	-	81502313	81524225
AK085135	4.11917	0.651197	3.01765	0.0823651	0.830383	up	1	4	1	0	0	0	0.707016	1.69872	0.556593	0.0597462	0.0597462	0.0597462	TUname20730	Genbank	chr7	+	142458217	142460724	2508	intergenic
ENSMUST00000122854	4.11917	0.651197	3.01765	0.0823651	0.830383	up	1	4	1	0	0	0	0.707016	1.69872	0.556593	0.0597462	0.0597462	0.0597462	Gm12356	Ensembl	chr11	-	98682920	98683415	353	natural antisense	NM_009439	Psmd3	+	98682553	98695978
AI428565	4.1151	0.649491	3.0121	0.0826475	0.830383	up	4	0	2	0	0	0	1.76674	0.0597462	0.925468	0.0597462	0.0597462	0.0597462	TUname63208	Genbank	chr11	-	30286734	30287069	315	intergenic
ENSMUST00000132211	4.1151	0.649491	3.0121	0.0826475	0.830383	up	4	0	2	0	0	0	1.76674	0.0597462	0.925468	0.0597462	0.0597462	0.0597462	Gm13187	Ensembl	chr2	-	4287594	4301112	500	natural antisense	ENSMUST00000175669	Frmd4a	+	4300517	4572439
ENSMUST00000117118	4.1151	0.649491	3.0121	0.0826475	0.830383	up	4	0	2	0	0	0	1.76674	0.0597462	0.925468	0.0597462	0.0597462	0.0597462	Rpl7a-ps9	Ensembl	chr7	+	81445919	81446696	777	intronic antisense	NM_001252525	Cpeb1	-	81347025	81454758
ENSMUST00000139272	4.1151	0.649491	3.0121	0.0826475	0.830383	up	4	0	2	0	0	0	1.76674	0.0597462	0.925468	0.0597462	0.0597462	0.0597462	Gm12610	Ensembl	chr4	+	89421847	89463487	581	intergenic
ENSMUST00000156796	4.1151	0.649491	3.0121	0.0826475	0.830383	up	4	0	2	0	0	0	1.76674	0.0597462	0.925468	0.0597462	0.0597462	0.0597462	Rrp9	Ensembl	chr9	+	106480799	106481649	411	exon sense-overlapping	ENSMUST00000123464	Rrp9	+	106475962	106481873
ENSMUST00000135089	4.10722	2.23206	10.061	0.00151475	0.413159	up	25	4	10	0	2	0	3.98147	1.69872	2.41342	0.0597462	1.02449	0.0597462	Tbc1d10a	Ensembl	chr11	+	4212310	4213600	777	exon sense-overlapping	uc011xqv.1	Tbc1d10a	+	4186832	4215505
ENSMUST00000133848	4.10591	0.64895	3.00324	0.0831008	0.830383	up	0	5	1	0	0	0	0.0597462	1.9249	0.556593	0.0597462	0.0597462	0.0597462	Mtss1l	Ensembl	chr8	+	110737116	110738381	720	exon sense-overlapping	ENSMUST00000141302	Mtss1l	+	110727356	110738073
TCONS_00015252	4.10591	0.64895	3.00324	0.0831008	0.830383	up	0	5	1	0	0	0	0.0597462	1.9249	0.556593	0.0597462	0.0597462	0.0597462	XLOC_011623	Alexander et al 2013	chr18	-	75816222	75817250	453	intergenic
TCONS_00032265	4.10591	0.64895	3.00324	0.0831008	0.830383	up	0	5	1	0	0	0	0.0597462	1.9249	0.556593	0.0597462	0.0597462	0.0597462	XLOC_023683	Alexander et al 2013	chr8	+	48216760	48218539	141	intergenic
TCONS_00032221	4.10591	0.64895	3.00324	0.0831008	0.830383	up	0	5	1	0	0	0	0.0597462	1.9249	0.556593	0.0597462	0.0597462	0.0597462	XLOC_023591	Alexander et al 2013	chr8	+	25122432	25129973	6334	intergenic
AK016326	4.10591	0.64895	3.00324	0.0831008	0.830383	up	0	5	1	0	0	0	0.0597462	1.9249	0.556593	0.0597462	0.0597462	0.0597462	TUname16469	Genbank	chr13	-	38460239	38461793	856	intronic antisense	NM_007556	Bmp6	+	38345715	38499728
AK045685	4.09666	2.67565	15.1312	0.000100479	0.0643207	up	1	3	63	0	3	0	0.707016	1.43038	4.80933	0.0597462	1.33926	0.0597462	TUname12721	Genbank	chr11	-	55608072	55608657	585	intergenic
uc012dhw.1	4.07882	1.67067	5.74168	0.0165684	0.830383	up	4	16	3	0	0	1	1.76674	3.30125	1.21897	0.0597462	0.0597462	0.718048	1700024P16Rik	UCSC_knowngene	chr4	+	104913455	105016863	3175	exon sense-overlapping	uc012dhy.1	1700024P16Rik	+	104913455	105016863
ENSMUST00000148732	4.07711	0.679537	2.99347	0.0836032	0.830383	up	0	0	7	0	0	0	0.0597462	0.0597462	2.01501	0.0597462	0.0597462	0.0597462	Il34	Ensembl	chr8	-	110755235	110790888	515	exon sense-overlapping	uc012gko.1	Il34	-	110741828	110755650
ENSMUST00000134941	4.07711	0.679537	2.99347	0.0836032	0.830383	up	0	0	7	0	0	0	0.0597462	0.0597462	2.01501	0.0597462	0.0597462	0.0597462	Snx29	Ensembl	chr16	+	11447307	11661496	1515	exon sense-overlapping	ENSMUST00000096273	Snx29	+	11405647	11755472
ENSMUST00000156402	4.07711	0.679537	2.99347	0.0836032	0.830383	up	0	0	7	0	0	0	0.0597462	0.0597462	2.01501	0.0597462	0.0597462	0.0597462	Lepr	Ensembl	chr4	+	101771367	101782895	889	exon sense-overlapping	uc008tvx.2	Lepr	+	101717406	101795982
AK146551	4.07711	0.679537	2.99347	0.0836032	0.830383	up	0	0	7	0	0	0	0.0597462	0.0597462	2.01501	0.0597462	0.0597462	0.0597462	TUname37201	Genbank	chr19	+	10573511	10576545	3038	natural antisense	uc008gqf.1	Tmem138	-	10573676	10577081
AK146495	4.07711	0.679537	2.99347	0.0836032	0.830383	up	0	0	7	0	0	0	0.0597462	0.0597462	2.01501	0.0597462	0.0597462	0.0597462	TUname61158	Genbank	chr11	-	87544149	87546737	2586	intronic antisense	ENSMUST00000100657	Tex14	+	87539003	87555819
AK139111	4.07711	0.679537	2.99347	0.0836032	0.830383	up	0	0	7	0	0	0	0.0597462	0.0597462	2.01501	0.0597462	0.0597462	0.0597462	TUname11900	Genbank	chr17	-	11283921	11286765	2844	intronic antisense	uc012akc.1	Park2	+	10840383	12063360
ENSMUST00000169420	4.07711	0.679537	2.99347	0.0836032	0.830383	up	0	0	7	0	0	0	0.0597462	0.0597462	2.01501	0.0597462	0.0597462	0.0597462	BC050972	Ensembl	chr9	-	66798910	66802559	342	natural antisense	ENSMUST00000098612	Gm10647	+	66797038	66799074
uc007gqp.1	4.07711	0.679537	2.99347	0.0836032	0.830383	up	0	0	7	0	0	0	0.0597462	0.0597462	2.01501	0.0597462	0.0597462	0.0597462	Tex18	UCSC_knowngene	chr10	+	86913498	86914681	1183	intronic antisense	uc011xkz.1	Stab2	-	86883299	87007942
uc011zpm.1	4.07711	0.679537	2.99347	0.0836032	0.830383	up	0	0	7	0	0	0	0.0597462	0.0597462	2.01501	0.0597462	0.0597462	0.0597462	AK084042	UCSC_knowngene	chr14	-	104445075	104459336	4192	intergenic
ENSMUST00000120465	4.07711	0.679537	2.99347	0.0836032	0.830383	up	0	0	7	0	0	0	0.0597462	0.0597462	2.01501	0.0597462	0.0597462	0.0597462	Gm11224	Ensembl	chr4	-	69954165	69955276	1111	intergenic
ENSMUST00000152880	4.07711	0.679537	2.99347	0.0836032	0.830383	up	0	0	7	0	0	0	0.0597462	0.0597462	2.01501	0.0597462	0.0597462	0.0597462	Tab3	Ensembl	chrX	+	85574038	85575625	360	exon sense-overlapping	ENSMUST00000137438	Tab3	+	85574033	85614193
ENSMUST00000183294	4.07711	0.679537	2.99347	0.0836032	0.830383	up	0	0	7	0	0	0	0.0597462	0.0597462	2.01501	0.0597462	0.0597462	0.0597462	Gm27016	Ensembl	chr8	-	87476054	87495462	715	intergenic
ENSMUST00000131950	4.06764	1.6208	5.49544	0.0190677	0.830383	up	9	8	5	0	1	0	2.66757	2.44625	1.67121	0.0597462	0.621297	0.0597462	Sp110	Ensembl	chr1	-	85576902	85598749	2293	exon sense-overlapping	NM_175397	Sp110	-	85576898	85603891
ENSMUST00000180770	4.06141	0.640507	2.95418	0.0856582	0.830383	up	0	4	2	0	0	0	0.0597462	1.69872	0.925468	0.0597462	0.0597462	0.0597462	Gm26674	Ensembl	chr10	+	8884593	8886880	1491	natural antisense	NM_175155	Sash1	-	8722218	8886070
uc008rua.1	4.06141	0.640507	2.95418	0.0856582	0.830383	up	0	4	2	0	0	0	0.0597462	1.69872	0.925468	0.0597462	0.0597462	0.0597462	Msh4	UCSC_knowngene	chr3	-	153857146	153865100	2251	exon sense-overlapping	uc008ruc.1	Msh4	-	153857146	153879990
ENSMUST00000154688	4.06141	0.640507	2.95418	0.0856582	0.830383	up	0	4	2	0	0	0	0.0597462	1.69872	0.925468	0.0597462	0.0597462	0.0597462	Paics	Ensembl	chr5	+	76966156	76966841	443	exon sense-overlapping	ENSMUST00000120912	Paics	+	76951347	76967509
TCONS_00034001	4.06141	0.640507	2.95418	0.0856582	0.830383	up	0	4	2	0	0	0	0.0597462	1.69872	0.925468	0.0597462	0.0597462	0.0597462	XLOC_025140	Alexander et al 2013	chr9	+	62198882	62245447	1871	intergenic
ENSMUST00000118758	4.06141	0.640507	2.95418	0.0856582	0.830383	up	0	4	2	0	0	0	0.0597462	1.69872	0.925468	0.0597462	0.0597462	0.0597462	Gm12871	Ensembl	chr4	+	120901222	120901660	438	intergenic
ENSMUST00000162986	4.06141	0.640507	2.95418	0.0856582	0.830383	up	0	4	2	0	0	0	0.0597462	1.69872	0.925468	0.0597462	0.0597462	0.0597462	Alkbh1	Ensembl	chr12	-	87433245	87443833	1319	exon sense-overlapping	ENSMUST00000160687	Alkbh1	-	87429120	87438559
uc008rjh.1	4.06141	0.640507	2.95418	0.0856582	0.830383	up	0	4	2	0	0	0	0.0597462	1.69872	0.925468	0.0597462	0.0597462	0.0597462	BC051212	UCSC_knowngene	chr3	-	131110580	131112090	1510	natural antisense	NM_010703	Lef1	+	131110296	131224357
ENSMUST00000149098	4.06141	0.640507	2.95418	0.0856582	0.830383	up	0	4	2	0	0	0	0.0597462	1.69872	0.925468	0.0597462	0.0597462	0.0597462	2900056M20Rik	Ensembl	chrX	-	152298651	152327495	445	intergenic
ENSMUST00000138330	4.05715	0.638799	2.94848	0.0859609	0.830383	up	3	0	3	0	0	0	1.49196	0.0597462	1.21897	0.0597462	0.0597462	0.0597462	Prim1	Ensembl	chr10	+	128026686	128030033	819	exon sense-overlapping	ENSMUST00000178041	Prim1	+	128015167	128029983
ENSMUST00000160564	4.05715	0.638799	2.94848	0.0859609	0.830383	up	3	0	3	0	0	0	1.49196	0.0597462	1.21897	0.0597462	0.0597462	0.0597462	Gm15851	Ensembl	chr1	+	133906530	133914822	662	natural antisense	NM_054077	Prelp	-	133910303	133921401
ENSMUST00000143089	4.04406	1.59752	5.32583	0.0210132	0.830383	up	17	0	4	1	0	0	3.4692	0.0597462	1.46274	0.626355	0.0597462	0.0597462	Rad54l	Ensembl	chr4	-	116117824	116123690	1519	exon sense-overlapping	NM_001122958	Rad54l	-	116096954	116123689
AK139978	4.02286	1.58715	5.23178	0.0221795	0.830383	up	11	6	4	0	1	0	2.91339	2.12037	1.46274	0.0597462	0.621297	0.0597462	TUname37312	Genbank	chr5	-	67260339	67261262	923	natural antisense	ENSMUST00000161369	Tmem33	+	67260804	67288010
ENSMUST00000153676	4.01597	0.63207	2.90473	0.0883224	0.830383	up	0	3	3	0	0	0	0.0597462	1.43038	1.21897	0.0597462	0.0597462	0.0597462	Mfsd2b	Ensembl	chr12	-	4867235	4869261	576	exon sense-overlapping	NM_001033488	Mfsd2b	-	4862437	4874359
uc009imf.1	4.01597	0.63207	2.90473	0.0883224	0.830383	up	0	3	3	0	0	0	0.0597462	1.43038	1.21897	0.0597462	0.0597462	0.0597462	AK040058	UCSC_knowngene	chr7	-	99870665	99889358	1140	natural antisense	NM_001164258	Xrra1	+	99859217	99917824
ENSMUST00000158369	4.01597	0.63207	2.90473	0.0883224	0.830383	up	0	3	3	0	0	0	0.0597462	1.43038	1.21897	0.0597462	0.0597462	0.0597462	Gm23046	Ensembl	chr2	+	66602514	66602798	284	intronic antisense	ENSMUST00000169900	Scn9a	-	66482090	66634653
ENSMUST00000138572	4.01597	0.63207	2.90473	0.0883224	0.830383	up	0	3	3	0	0	0	0.0597462	1.43038	1.21897	0.0597462	0.0597462	0.0597462	Arl4a	Ensembl	chr12	-	40009608	40014484	629	intergenic
ENSMUST00000170150	4.01334	1.61216	5.33144	0.0209457	0.830383	up	3	8	12	1	0	0	1.49196	2.44625	2.62863	0.626355	0.0597462	0.0597462	A430057M04Rik	Ensembl	chr14	+	21847577	21851034	2170	natural antisense	ENSMUST00000177527	Comtd1	-	21847274	21848687
TCONS_00036047	3.99762	0.628119	2.88426	0.0894514	0.830383	up	2	0	4	0	0	0	1.15223	0.0597462	1.46274	0.0597462	0.0597462	0.0597462	XLOC_026686	Alexander et al 2013	chrX	+	123788227	123813359	335	exon sense-overlapping	ENSMUST00000178148	Gm5167	+	123793664	123813765
AK014826	3.99354	1.60278	5.24241	0.0220444	0.830383	up	8	0	15	1	0	0	2.52693	0.0597462	2.90109	0.626355	0.0597462	0.0597462	TUname15781	Genbank	chr10	-	82126675	82128287	1610	natural antisense	NM_001163064	AU041133	+	82128012	82153065
uc009bpt.1	3.98914	1.60488	5.21354	0.0224133	0.830383	up	8	12	1	0	0	1	2.52693	2.93618	0.556593	0.0597462	0.0597462	0.718048	AK018014	UCSC_knowngene	chr6	+	41543224	41544098	874	exon sense-overlapping	uc029vun.1	BV12S11J2S3	+	41116174	41543271
BB640943	3.98363	0.625878	2.8696	0.0902698	0.830383	up	1	1	4	0	0	0	0.707016	0.671968	1.46274	0.0597462	0.0597462	0.0597462	TUname63447	Genbank	chr9	+	91404473	91562818	690	intergenic
ENSMUST00000128679	3.98363	0.625878	2.8696	0.0902698	0.830383	up	1	1	4	0	0	0	0.707016	0.671968	1.46274	0.0597462	0.0597462	0.0597462	Ier3ip1	Ensembl	chr18	+	76930062	76939748	335	exon sense-overlapping	NM_025409	Ier3ip1	+	76930026	76941614
NR_040460	3.97452	0.584588	2.83404	0.0922883	0.830383	up	5	0	0	0	0	0	1.99747	0.0597462	0.0597462	0.0597462	0.0597462	0.0597462	1700016L21Rik	RefSeq	chr1	+	80445931	80475660	394	intergenic
ENSMUST00000120384	3.97452	0.584588	2.83404	0.0922883	0.830383	up	5	0	0	0	0	0	1.99747	0.0597462	0.0597462	0.0597462	0.0597462	0.0597462	Rpl7a-ps12	Ensembl	chrX	-	152908777	152910296	794	intron sense-overlapping	ENSMUST00000178147	Gm6472	-	152909503	152910155
uc029tjk.1	3.97452	0.584588	2.83404	0.0922883	0.830383	up	5	0	0	0	0	0	1.99747	0.0597462	0.0597462	0.0597462	0.0597462	0.0597462	DQ564194	UCSC_knowngene	chr17	-	66192117	66192147	30	intergenic
uc008shx.1	3.97452	0.584588	2.83404	0.0922883	0.830383	up	5	0	0	0	0	0	1.99747	0.0597462	0.0597462	0.0597462	0.0597462	0.0597462	AK142614	UCSC_knowngene	chr4	+	40858953	40891127	2291	intergenic
ENSMUST00000180854	3.97452	0.584588	2.83404	0.0922883	0.830383	up	5	0	0	0	0	0	1.99747	0.0597462	0.0597462	0.0597462	0.0597462	0.0597462	Gm26643	Ensembl	chr4	+	43030998	43032482	1274	natural antisense	ENSMUST00000136326	Stoml2	-	43028228	43031456
ENSMUST00000122966	3.97452	0.584588	2.83404	0.0922883	0.830383	up	5	0	0	0	0	0	1.99747	0.0597462	0.0597462	0.0597462	0.0597462	0.0597462	Nol11	Ensembl	chr11	-	107167359	107168433	434	exon sense-overlapping	NM_133702	Nol11	-	107166660	107189381
ENSMUST00000126360	3.97452	0.584588	2.83404	0.0922883	0.830383	up	5	0	0	0	0	0	1.99747	0.0597462	0.0597462	0.0597462	0.0597462	0.0597462	Txnl4a	Ensembl	chr18	+	80206893	80218879	419	exon sense-overlapping	NM_025299	Txnl4a	+	80206797	80225851
uc029vms.1	3.97452	0.584588	2.83404	0.0922883	0.830383	up	5	0	0	0	0	0	1.99747	0.0597462	0.0597462	0.0597462	0.0597462	0.0597462	DQ707786	UCSC_knowngene	chr5	-	114817750	114817780	30	intron sense-overlapping	ENSMUST00000140374	Gm20499	-	114809035	114823460
AK157033_2	3.97452	0.584588	2.83404	0.0922883	0.830383	up	5	0	0	0	0	0	1.99747	0.0597462	0.0597462	0.0597462	0.0597462	0.0597462
TCONS_00027388	3.97452	0.584588	2.83404	0.0922883	0.830383	up	5	0	0	0	0	0	1.99747	0.0597462	0.0597462	0.0597462	0.0597462	0.0597462	TUname28700	Alexander et al 2013	chr6	-	90171439	90173213	75	intergenic
TCONS_00010994	3.97452	0.584588	2.83404	0.0922883	0.830383	up	5	0	0	0	0	0	1.99747	0.0597462	0.0597462	0.0597462	0.0597462	0.0597462	XLOC_008720	Alexander et al 2013	chr15	-	85691967	85696573	3310	intergenic
NR_029443	3.97452	0.584588	2.83404	0.0922883	0.830383	up	5	0	0	0	0	0	1.99747	0.0597462	0.0597462	0.0597462	0.0597462	0.0597462	4933407K13Rik	RefSeq	chrX	-	75725457	75764699	3376	intergenic
ENSMUST00000122575	3.97452	0.584588	2.83404	0.0922883	0.830383	up	5	0	0	0	0	0	1.99747	0.0597462	0.0597462	0.0597462	0.0597462	0.0597462	Gm24184	Ensembl	chr8	-	31661330	31661431	101	intergenic
ENSMUST00000133679	3.97452	0.584588	2.83404	0.0922883	0.830383	up	5	0	0	0	0	0	1.99747	0.0597462	0.0597462	0.0597462	0.0597462	0.0597462	Xrcc3	Ensembl	chr12	-	111811503	111812221	434	exon sense-overlapping	NM_028875	Xrcc3	-	111803192	111813841
ENSMUST00000152242	3.97452	0.584588	2.83404	0.0922883	0.830383	up	5	0	0	0	0	0	1.99747	0.0597462	0.0597462	0.0597462	0.0597462	0.0597462	Ms4a4b	Ensembl	chr19	+	11461138	11463288	550	exon sense-overlapping	NM_021718	Ms4a4b	+	11443557	11463548
ENSMUST00000117181	3.96955	0.623639	2.85492	0.0910971	0.830383	up	0	2	4	0	0	0	0.0597462	1.10044	1.46274	0.0597462	0.0597462	0.0597462	Gm6141	Ensembl	chr3	+	19584790	19585538	695	intron sense-overlapping	NM_025489	Dnajc5b	+	19508594	19610862
ENSMUST00000149115	3.96955	0.623639	2.85492	0.0910971	0.830383	up	0	2	4	0	0	0	0.0597462	1.10044	1.46274	0.0597462	0.0597462	0.0597462	Tpm3	Ensembl	chr3	+	90086370	90087547	302	exon sense-overlapping	NM_001271764	Tpm3	+	90079520	90100902
ENSMUST00000118742	3.96955	0.623639	2.85492	0.0910971	0.830383	up	0	2	4	0	0	0	0.0597462	1.10044	1.46274	0.0597462	0.0597462	0.0597462	Gm13314	Ensembl	chr2	-	14691380	14691699	319	intronic antisense	ENSMUST00000156027	Cacnb2	+	14605115	14961042
AK017785	3.96955	0.623639	2.85492	0.0910971	0.830383	up	0	2	4	0	0	0	0.0597462	1.10044	1.46274	0.0597462	0.0597462	0.0597462	TUname13876	Genbank	chr9	-	69988399	69989968	1568	natural antisense	NM_001008238	Bnip2	+	69989465	70011659
ENSMUST00000146902	3.96955	0.623639	2.85492	0.0910971	0.830383	up	0	2	4	0	0	0	0.0597462	1.10044	1.46274	0.0597462	0.0597462	0.0597462	Gm15527	Ensembl	chr6	-	54245741	54254911	3210	intronic antisense	NM_001163640	Chn2	+	54039931	54301812
ENSMUST00000125155	3.96955	0.623639	2.85492	0.0910971	0.830383	up	0	2	4	0	0	0	0.0597462	1.10044	1.46274	0.0597462	0.0597462	0.0597462	Lgals4	Ensembl	chr7	+	28834155	28835853	408	exon sense-overlapping	NM_010706	Lgals4	+	28833793	28841703
ENSMUST00000168475	3.96955	0.623639	2.85492	0.0910971	0.830383	up	0	2	4	0	0	0	0.0597462	1.10044	1.46274	0.0597462	0.0597462	0.0597462	BC050972	Ensembl	chr9	-	66798677	66802859	526	natural antisense	ENSMUST00000098612	Gm10647	+	66797038	66799074
TCONS_00013430	3.96955	0.623639	2.85492	0.0910971	0.830383	up	0	2	4	0	0	0	0.0597462	1.10044	1.46274	0.0597462	0.0597462	0.0597462	XLOC_010402	Alexander et al 2013	chr17	+	94811854	94827141	14867	intergenic
ENSMUST00000126708	3.95993	0.582288	2.81873	0.0931728	0.830383	up	4	1	0	0	0	0	1.76674	0.671968	0.0597462	0.0597462	0.0597462	0.0597462	Gm10444	Ensembl	chr6	+	85140504	85143649	148	intergenic
ENSMUST00000176989	3.95993	0.582288	2.81873	0.0931728	0.830383	up	4	1	0	0	0	0	1.76674	0.671968	0.0597462	0.0597462	0.0597462	0.0597462	Vmn2r-ps4	Ensembl	chr3	+	64328659	64332853	1015	intergenic
AK157533	3.95993	0.582288	2.81873	0.0931728	0.830383	up	4	1	0	0	0	0	1.76674	0.671968	0.0597462	0.0597462	0.0597462	0.0597462	TUname35214	Genbank	chr16	-	58724038	58726714	2677	intergenic
ENSMUST00000122998	3.95993	0.582288	2.81873	0.0931728	0.830383	up	4	1	0	0	0	0	1.76674	0.671968	0.0597462	0.0597462	0.0597462	0.0597462	Mamstr	Ensembl	chr7	+	45639976	45640990	343	exon sense-overlapping	NM_172418	Mamstr	+	45639976	45645768
ENSMUST00000182579	3.95993	0.582288	2.81873	0.0931728	0.830383	up	4	1	0	0	0	0	1.76674	0.671968	0.0597462	0.0597462	0.0597462	0.0597462	Gm19200	Ensembl	chrX	-	103287166	103288970	1001	intergenic
AK157695	3.95993	0.582288	2.81873	0.0931728	0.830383	up	4	1	0	0	0	0	1.76674	0.671968	0.0597462	0.0597462	0.0597462	0.0597462	TUname4978	Genbank	chr15	-	4076218	4077923	1707	intronic antisense	ENSMUST00000138927	Oxct1	+	4026683	4153963
2_00017368	3.95506	1.54397	4.88954	0.0270217	0.830383	up	8	9	3	0	1	0	2.52693	2.58519	1.21897	0.0597462	0.621297	0.0597462	Snhg7	Lei Sun et al 2012	chr2	-	26637161	26639603	701	intergenic
ENSMUST00000175674	3.94847	1.52685	4.79729	0.0285064	0.830383	up	17	1	1	1	0	0	3.4692	0.671968	0.556593	0.626355	0.0597462	0.0597462	Gm20667	Ensembl	chr14	-	67673176	67675106	1930	intergenic
ENSMUST00000161848	3.94525	0.579988	2.80339	0.0940679	0.830383	up	3	2	0	0	0	0	1.49196	1.10044	0.0597462	0.0597462	0.0597462	0.0597462	Gm15749	Ensembl	chr5	+	120648039	120648749	612	intergenic
ENSMUST00000128332	3.94525	0.579988	2.80339	0.0940679	0.830383	up	3	2	0	0	0	0	1.49196	1.10044	0.0597462	0.0597462	0.0597462	0.0597462	Adam8	Ensembl	chr7	-	139978931	139992562	3669	exon sense-overlapping	ENSMUST00000026546	Adam8	-	139978931	139992548
ENSMUST00000141998	3.93651	0.61745	2.81953	0.0931264	0.830383	up	1	0	5	0	0	0	0.707016	0.0597462	1.67121	0.0597462	0.0597462	0.0597462	Sp100	Ensembl	chr1	+	85649987	85662871	699	exon sense-overlapping	NM_013673	Sp100	+	85650049	85709448
ENSMUST00000143898	3.93651	0.61745	2.81953	0.0931264	0.830383	up	1	0	5	0	0	0	0.707016	0.0597462	1.67121	0.0597462	0.0597462	0.0597462	Gm13652	Ensembl	chr2	-	75124870	75137798	3412	intergenic
ENSMUST00000168179	3.93651	0.61745	2.81953	0.0931264	0.830383	up	1	0	5	0	0	0	0.707016	0.0597462	1.67121	0.0597462	0.0597462	0.0597462	Ccr5	Ensembl	chr9	+	124121572	124131901	663	exon sense-overlapping	NM_009917	Ccr5	+	124121542	124127183
AK020407	3.93651	0.61745	2.81953	0.0931264	0.830383	up	1	0	5	0	0	0	0.707016	0.0597462	1.67121	0.0597462	0.0597462	0.0597462	TUname56156	Genbank	chr5	+	135264325	135265129	805	intergenic
ENSMUST00000174089	3.93048	0.57769	2.78803	0.0949737	0.830383	up	2	3	0	0	0	0	1.15223	1.43038	0.0597462	0.0597462	0.0597462	0.0597462	Pla2g6	Ensembl	chr15	-	79311737	79318012	708	exon sense-overlapping	ENSMUST00000172936	Pla2g6	-	79317870	79324488
ENSMUST00000138906	3.93048	0.57769	2.78803	0.0949737	0.830383	up	2	3	0	0	0	0	1.15223	1.43038	0.0597462	0.0597462	0.0597462	0.0597462	Gls	Ensembl	chr1	-	52168446	52190910	434	exon sense-overlapping	NM_001081081	Gls	-	52163449	52233232
uc009qgx.1	3.93048	0.57769	2.78803	0.0949737	0.830383	up	2	3	0	0	0	0	1.15223	1.43038	0.0597462	0.0597462	0.0597462	0.0597462	DQ550048	UCSC_knowngene	chr9	-	67703950	67704013	63	intergenic
TCONS_00029558	3.93048	0.57769	2.78803	0.0949737	0.830383	up	2	3	0	0	0	0	1.15223	1.43038	0.0597462	0.0597462	0.0597462	0.0597462	XLOC_023232	Alexander et al 2013	chr7	-	125284092	125297511	860	intergenic
AV452492	3.92216	0.615213	2.80485	0.0939821	0.830383	up	0	1	5	0	0	0	0.0597462	0.671968	1.67121	0.0597462	0.0597462	0.0597462	TUname63361	Genbank	chr14	-	105853072	105862501	504	intergenic
ENSMUST00000139483	3.92216	0.615213	2.80485	0.0939821	0.830383	up	0	1	5	0	0	0	0.0597462	0.671968	1.67121	0.0597462	0.0597462	0.0597462	Gm13846	Ensembl	chr6	+	31651040	31662021	462	intergenic
AK085795	3.92216	0.615213	2.80485	0.0939821	0.830383	up	0	1	5	0	0	0	0.0597462	0.671968	1.67121	0.0597462	0.0597462	0.0597462	TUname4538	Genbank	chr5	+	98031566	98034005	2442	bidirectional	NM_133738	Antxr2	-	97884687	98030962
AK041718	3.91562	0.575392	2.77265	0.0958901	0.830383	up	1	4	0	0	0	0	0.707016	1.69872	0.0597462	0.0597462	0.0597462	0.0597462	TUname1410	Genbank	chr13	-	101546397	101548133	1737	intergenic
AK089902	3.91562	0.575392	2.77265	0.0958901	0.830383	up	1	4	0	0	0	0	0.707016	1.69872	0.0597462	0.0597462	0.0597462	0.0597462	TUname31334	Genbank	chr10	+	21456881	21458631	1751	intergenic
ENSMUST00000172937	3.91562	0.575392	2.77265	0.0958901	0.830383	up	1	4	0	0	0	0	0.707016	1.69872	0.0597462	0.0597462	0.0597462	0.0597462	Gm18734	Ensembl	chr17	-	35304205	35306317	808	intergenic
2_00004448	3.91073	0.573614	2.76632	0.09627	0.830383	up	4	0	1	0	0	0	1.76674	0.0597462	0.556593	0.0597462	0.0597462	0.0597462	Copz2	Lei Sun et al 2012	chr11	+	96855722	96861202	457	exon sense-overlapping	NM_019877	Copz2	+	96849875	96861202
ENSMUST00000160314	3.91073	0.573614	2.76632	0.09627	0.830383	up	4	0	1	0	0	0	1.76674	0.0597462	0.556593	0.0597462	0.0597462	0.0597462	Egflam	Ensembl	chr15	-	7212190	7223069	490	exon sense-overlapping	NM_178748	Egflam	-	7206119	7398304
ENSMUST00000129869	3.91073	0.573614	2.76632	0.09627	0.830383	up	4	0	1	0	0	0	1.76674	0.0597462	0.556593	0.0597462	0.0597462	0.0597462	Srebf1	Ensembl	chr11	-	60201363	60202215	516	exon sense-overlapping	ENSMUST00000144942	Srebf1	-	60200462	60210465
ENSMUST00000183840	3.91073	0.573614	2.76632	0.09627	0.830383	up	4	0	1	0	0	0	1.76674	0.0597462	0.556593	0.0597462	0.0597462	0.0597462	Gm21464	Ensembl	chr14	-	69373825	69503362	1087	exon sense-overlapping	ENSMUST00000179116	Gm21464	-	69462308	69503362
ENSMUST00000159111	3.91073	0.573614	2.76632	0.09627	0.830383	up	4	0	1	0	0	0	1.76674	0.0597462	0.556593	0.0597462	0.0597462	0.0597462	Ano2	Ensembl	chr6	+	125690418	125957021	3181	exon sense-overlapping	NM_153589	Ano2	+	125690418	126040128
NR_046033	3.91073	0.573614	2.76632	0.09627	0.830383	up	4	0	1	0	0	0	1.76674	0.0597462	0.556593	0.0597462	0.0597462	0.0597462	Gm7538	RefSeq	chr5	-	119194312	119200018	1519	intergenic
ENSMUST00000130694	3.91073	0.573614	2.76632	0.09627	0.830383	up	4	0	1	0	0	0	1.76674	0.0597462	0.556593	0.0597462	0.0597462	0.0597462	Uba1	Ensembl	chrX	+	20659426	20669217	575	exon sense-overlapping	ENSMUST00000089217	Uba1	+	20658325	20683179
BI500066	3.91073	0.573614	2.76632	0.09627	0.830383	up	4	0	1	0	0	0	1.76674	0.0597462	0.556593	0.0597462	0.0597462	0.0597462	TUname63590	Genbank	chr10	-	18327478	18328005	527	intergenic
ENSMUST00000161193	3.91073	0.573614	2.76632	0.09627	0.830383	up	4	0	1	0	0	0	1.76674	0.0597462	0.556593	0.0597462	0.0597462	0.0597462	Hgd	Ensembl	chr16	+	37580253	37612060	1296	exon sense-overlapping	NM_013547	Hgd	+	37580152	37632026
NR_045488	3.91073	0.573614	2.76632	0.09627	0.830383	up	4	0	1	0	0	0	1.76674	0.0597462	0.556593	0.0597462	0.0597462	0.0597462	1700022H16Rik	RefSeq	chr12	-	9565235	9570585	476	intergenic
AK138748	3.90946	1.51223	4.66511	0.0307833	0.830383	up	5	14	0	1	0	0	1.99747	3.13023	0.0597462	0.626355	0.0597462	0.0597462	TUname38148	Genbank	chr9	-	94667207	94668818	1050	intergenic
ENSMUST00000159264	3.90791	2.11034	8.33351	0.0038927	0.690037	up	23	6	5	1	0	1	3.86943	2.12037	1.67121	0.626355	0.0597462	0.718048	Psat1	Ensembl	chr19	-	15916838	15918337	438	exon sense-overlapping	ENSMUST00000162416	Psat1	-	15915008	15947337
ENSMUST00000135591	3.90068	0.573096	2.75725	0.0968173	0.830383	up	0	5	0	0	0	0	0.0597462	1.9249	0.0597462	0.0597462	0.0597462	0.0597462	Lrp8	Ensembl	chr4	+	107846200	107848295	557	exon sense-overlapping	ENSMUST00000126573	Lrp8	+	107802412	107872816
ENSMUST00000127239	3.90068	0.573096	2.75725	0.0968173	0.830383	up	0	5	0	0	0	0	0.0597462	1.9249	0.0597462	0.0597462	0.0597462	0.0597462	Trmt2a	Ensembl	chr16	+	18248678	18253502	2805	exon sense-overlapping	ENSMUST00000145112	Trmt2a	+	18250020	18253112
AK029895	3.90068	0.573096	2.75725	0.0968173	0.830383	up	0	5	0	0	0	0	0.0597462	1.9249	0.0597462	0.0597462	0.0597462	0.0597462	TUname2800	Genbank	chr10	+	95264316	95267013	2697	intronic antisense	uc007gwa.1	Cradd	-	95174745	95322965
ENSMUST00000142039	3.90068	0.573096	2.75725	0.0968173	0.830383	up	0	5	0	0	0	0	0.0597462	1.9249	0.0597462	0.0597462	0.0597462	0.0597462	Sytl1	Ensembl	chr4	-	133253097	133263087	2484	exon sense-overlapping	NM_031393	Sytl1	-	133253089	133263087
ENSMUST00000133307	3.90068	0.573096	2.75725	0.0968173	0.830383	up	0	5	0	0	0	0	0.0597462	1.9249	0.0597462	0.0597462	0.0597462	0.0597462	Bnip2	Ensembl	chr9	+	69998231	70003637	643	exon sense-overlapping	NM_016787	Bnip2	+	69989465	70011659
ENSMUST00000135203	3.90068	0.573096	2.75725	0.0968173	0.830383	up	0	5	0	0	0	0	0.0597462	1.9249	0.0597462	0.0597462	0.0597462	0.0597462	Gm4577	Ensembl	chr17	+	35703895	35708244	716	natural antisense	NM_007584	Ddr1	-	35681566	35704139
ENSMUST00000132247	3.90068	0.573096	2.75725	0.0968173	0.830383	up	0	5	0	0	0	0	0.0597462	1.9249	0.0597462	0.0597462	0.0597462	0.0597462	Gm13063	Ensembl	chr4	+	132048177	132048961	669	natural antisense	ENSMUST00000141291	Epb4.1	-	131957619	132049091
ENSMUST00000134307	3.90068	0.573096	2.75725	0.0968173	0.830383	up	0	5	0	0	0	0	0.0597462	1.9249	0.0597462	0.0597462	0.0597462	0.0597462	Map4k2	Ensembl	chr19	+	6342536	6342845	223	exon sense-overlapping	NM_009006	Map4k2	+	6341249	6353527
ENSMUST00000123814	3.90068	0.573096	2.75725	0.0968173	0.830383	up	0	5	0	0	0	0	0.0597462	1.9249	0.0597462	0.0597462	0.0597462	0.0597462	Skap1	Ensembl	chr11	+	96708234	96713202	706	exon sense-overlapping	NM_001177898	Skap1	+	96464590	96759622
ENSMUST00000118176	3.90068	0.573096	2.75725	0.0968173	0.830383	up	0	5	0	0	0	0	0.0597462	1.9249	0.0597462	0.0597462	0.0597462	0.0597462	Gm11633	Ensembl	chr11	+	97968791	97969235	444	intronic antisense	NM_001163608	Plxdc1	-	97923236	97986446
ENSMUST00000146132	3.90068	0.573096	2.75725	0.0968173	0.830383	up	0	5	0	0	0	0	0.0597462	1.9249	0.0597462	0.0597462	0.0597462	0.0597462	Gm16235	Ensembl	chr10	-	88444235	88449887	342	natural antisense	NM_001004164	Gnptab	+	88379411	88447329
ENSMUST00000123592	3.90068	0.573096	2.75725	0.0968173	0.830383	up	0	5	0	0	0	0	0.0597462	1.9249	0.0597462	0.0597462	0.0597462	0.0597462	Gm12066	Ensembl	chr11	+	24201417	24217601	443	intergenic
uc029ssv.1	3.90068	0.573096	2.75725	0.0968173	0.830383	up	0	5	0	0	0	0	0.0597462	1.9249	0.0597462	0.0597462	0.0597462	0.0597462	DQ724605	UCSC_knowngene	chr15	-	78662495	78662522	27	intergenic
ENSMUST00000141886	3.89573	0.571317	2.75088	0.0972036	0.830383	up	3	1	1	0	0	0	1.49196	0.671968	0.556593	0.0597462	0.0597462	0.0597462	Zdhhc7	Ensembl	chr8	-	120085411	120088268	670	exon sense-overlapping	NM_133967	Zdhhc7	-	120081094	120101472
AK043318	3.88944	1.50224	4.59048	0.0321518	0.830383	up	3	15	1	0	1	0	1.49196	3.21827	0.556593	0.0597462	0.621297	0.0597462	TUname48003	Genbank	chr1	-	149410722	149412179	1460	intergenic
AK142356	3.88064	0.569021	2.73542	0.098148	0.830383	up	2	2	1	0	0	0	1.15223	1.10044	0.556593	0.0597462	0.0597462	0.0597462	TUname50421	Genbank	chr5	-	24709789	24710456	669	natural antisense	uc012dti.1	Nub1	+	24685814	24710555
uc029vyn.1	3.88064	0.569021	2.73542	0.098148	0.830383	up	2	2	1	0	0	0	1.15223	1.10044	0.556593	0.0597462	0.0597462	0.0597462	AK218719	UCSC_knowngene	chr6	+	124934717	124935384	179	exon sense-overlapping	uc009dsq.2	Mlf2	+	124931387	124937238
uc029xcs.1	3.88064	0.569021	2.73542	0.098148	0.830383	up	2	2	1	0	0	0	1.15223	1.10044	0.556593	0.0597462	0.0597462	0.0597462	DQ549706	UCSC_knowngene	chr9	-	67718819	67718848	29	intergenic
ENSMUST00000128993	3.87545	1.51281	4.60021	0.03197	0.830383	up	4	9	7	1	0	0	1.76674	2.58519	2.01501	0.626355	0.0597462	0.0597462	Hras	Ensembl	chr7	-	141190925	141193994	1704	exon sense-overlapping	NM_001130444	Hras1	-	141189933	141194004
ENSMUST00000130686	3.87377	0.606794	2.7548	0.0969654	0.830383	up	0	0	6	0	0	0	0.0597462	0.0597462	1.85333	0.0597462	0.0597462	0.0597462	Stat3	Ensembl	chr11	-	100905655	100908224	349	exon sense-overlapping	NM_011486	Stat3	-	100886809	100939511
ENSMUST00000180401	3.87377	0.606794	2.7548	0.0969654	0.830383	up	0	0	6	0	0	0	0.0597462	0.0597462	1.85333	0.0597462	0.0597462	0.0597462	2610020F03Rik	Ensembl	chr16	-	21907921	21908777	588	natural antisense	NM_172821	Map3k13	+	21891968	21931877
AK156657	3.87377	0.606794	2.7548	0.0969654	0.830383	up	0	0	6	0	0	0	0.0597462	0.0597462	1.85333	0.0597462	0.0597462	0.0597462	TUname39640	Genbank	chr7	-	93604839	93608316	3478	intergenic
ENSMUST00000142260	3.87377	0.606794	2.7548	0.0969654	0.830383	up	0	0	6	0	0	0	0.0597462	0.0597462	1.85333	0.0597462	0.0597462	0.0597462	0610005C13Rik	Ensembl	chr7	-	45569085	45575173	2434	natural antisense	NM_001243053	Bcat2	+	45572869	45589710
AK137200	3.87377	0.606794	2.7548	0.0969654	0.830383	up	0	0	6	0	0	0	0.0597462	0.0597462	1.85333	0.0597462	0.0597462	0.0597462	TUname55316	Genbank	chr16	-	55491866	55494840	2975	intergenic
uc029tje.1	3.87377	0.606794	2.7548	0.0969654	0.830383	up	0	0	6	0	0	0	0.0597462	0.0597462	1.85333	0.0597462	0.0597462	0.0597462	DQ719796	UCSC_knowngene	chr17	-	66152486	66152517	31	intergenic
ENSMUST00000150318	3.87377	0.606794	2.7548	0.0969654	0.830383	up	0	0	6	0	0	0	0.0597462	0.0597462	1.85333	0.0597462	0.0597462	0.0597462	Fanca	Ensembl	chr8	-	123312282	123318560	895	exon sense-overlapping	NM_016925	Fanca	-	123268243	123318576
NR_045334	3.87377	0.606794	2.7548	0.0969654	0.830383	up	0	0	6	0	0	0	0.0597462	0.0597462	1.85333	0.0597462	0.0597462	0.0597462	B930092H01Rik	RefSeq	chr9	-	61259226	61293809	2678	intergenic
ENSMUST00000130553	3.87377	0.606794	2.7548	0.0969654	0.830383	up	0	0	6	0	0	0	0.0597462	0.0597462	1.85333	0.0597462	0.0597462	0.0597462	Chst9	Ensembl	chr18	-	15451923	15760157	1934	exon sense-overlapping	NM_199055	Chst9	-	15452174	15718046
ENSMUST00000141582	3.87377	0.606794	2.7548	0.0969654	0.830383	up	0	0	6	0	0	0	0.0597462	0.0597462	1.85333	0.0597462	0.0597462	0.0597462	BC039966	Ensembl	chr4	-	153947632	153950503	1371	intergenic
TCONS_00029460	3.87377	0.606794	2.7548	0.0969654	0.830383	up	0	0	6	0	0	0	0.0597462	0.0597462	1.85333	0.0597462	0.0597462	0.0597462	XLOC_022821	Alexander et al 2013	chr7	-	65860848	65862871	439	intronic antisense	ENSMUST00000176199	Pcsk6	+	65861733	65952984
uc009kdm.1	3.87377	0.606794	2.7548	0.0969654	0.830383	up	0	0	6	0	0	0	0.0597462	0.0597462	1.85333	0.0597462	0.0597462	0.0597462	AK041267	UCSC_knowngene	chr7	+	133747599	133753038	735	intronic antisense	ENSMUST00000130182	Dhx32	-	133749008	133776687
ENSMUST00000130728	3.87377	0.606794	2.7548	0.0969654	0.830383	up	0	0	6	0	0	0	0.0597462	0.0597462	1.85333	0.0597462	0.0597462	0.0597462	C2	Ensembl	chr17	-	34877053	34881967	850	exon sense-overlapping	NM_013484	C2	-	34862601	34882100
2_00025020	3.87377	0.606794	2.7548	0.0969654	0.830383	up	0	0	6	0	0	0	0.0597462	0.0597462	1.85333	0.0597462	0.0597462	0.0597462	Smyd5	Lei Sun et al 2012	chr6	+	85444532	85446443	1032	exon sense-overlapping	NM_144918	Smyd5	+	85431975	85446429
AK015070	3.87377	0.606794	2.7548	0.0969654	0.830383	up	0	0	6	0	0	0	0.0597462	0.0597462	1.85333	0.0597462	0.0597462	0.0597462	TUname47271	Genbank	chr16	+	78757732	78758984	1252	intergenic
TCONS_00003968	3.87377	0.606794	2.7548	0.0969654	0.830383	up	0	0	6	0	0	0	0.0597462	0.0597462	1.85333	0.0597462	0.0597462	0.0597462	XLOC_003102	Alexander et al 2013	chr11	+	59889912	59891561	1418	intergenic
TCONS_00006829	3.87377	0.606794	2.7548	0.0969654	0.830383	up	0	0	6	0	0	0	0.0597462	0.0597462	1.85333	0.0597462	0.0597462	0.0597462	XLOC_005441	Alexander et al 2013	chr12	+	113423141	113426090	2478	intronic antisense	uc007pgm.2	Igh	-	113287284	113429833
uc008cwq.1	3.87377	0.606794	2.7548	0.0969654	0.830383	up	0	0	6	0	0	0	0.0597462	0.0597462	1.85333	0.0597462	0.0597462	0.0597462	AK043085	UCSC_knowngene	chr17	-	48064788	48090378	1829	natural antisense	NM_026625	1700067P10Rik	+	48089631	48090920
AK043793	3.87377	0.606794	2.7548	0.0969654	0.830383	up	0	0	6	0	0	0	0.0597462	0.0597462	1.85333	0.0597462	0.0597462	0.0597462	TUname4525	Genbank	chr6	+	36721691	36723713	2023	intronic antisense	NM_008973	Ptn	-	36715662	36811361
ENSMUST00000135767	3.87377	0.606794	2.7548	0.0969654	0.830383	up	0	0	6	0	0	0	0.0597462	0.0597462	1.85333	0.0597462	0.0597462	0.0597462	Gm13346	Ensembl	chr2	-	19676710	19686157	3634	intergenic
ENSMUST00000132361	3.87377	0.606794	2.7548	0.0969654	0.830383	up	0	0	6	0	0	0	0.0597462	0.0597462	1.85333	0.0597462	0.0597462	0.0597462	Prlr	Ensembl	chr15	+	10177780	10319990	1209	exon sense-overlapping	ENSMUST00000130720	Prlr	+	10215954	10319344
uc011xmi.1	3.87377	0.606794	2.7548	0.0969654	0.830383	up	0	0	6	0	0	0	0.0597462	0.0597462	1.85333	0.0597462	0.0597462	0.0597462	Poc1b	UCSC_knowngene	chr10	+	99107170	99197988	2749	exon sense-overlapping	ENSMUST00000159228	Poc1b	+	99107081	99197052
AK030618	3.87377	0.606794	2.7548	0.0969654	0.830383	up	0	0	6	0	0	0	0.0597462	0.0597462	1.85333	0.0597462	0.0597462	0.0597462	TUname11597	Genbank	chr3	-	102783178	102784789	1611	intergenic
ENSMUST00000126069	3.87377	0.606794	2.7548	0.0969654	0.830383	up	0	0	6	0	0	0	0.0597462	0.0597462	1.85333	0.0597462	0.0597462	0.0597462	Pik3r6	Ensembl	chr11	+	68536199	68544383	633	exon sense-overlapping	NM_001081566	Pik3r6	+	68503018	68552698
ENSMUST00000144809	3.87377	0.606794	2.7548	0.0969654	0.830383	up	0	0	6	0	0	0	0.0597462	0.0597462	1.85333	0.0597462	0.0597462	0.0597462	Acot11	Ensembl	chr4	-	106753713	106755960	401	exon sense-overlapping	ENSMUST00000065253	Acot11	-	106747234	106804998
AK039688	3.87377	0.606794	2.7548	0.0969654	0.830383	up	0	0	6	0	0	0	0.0597462	0.0597462	1.85333	0.0597462	0.0597462	0.0597462	TUname34322	Genbank	chr7	-	29568902	29573928	1335	natural antisense	ENSMUST00000053635	4930432E11Rik	+	29560514	29575478
NR_033583	3.87377	0.606794	2.7548	0.0969654	0.830383	up	0	0	6	0	0	0	0.0597462	0.0597462	1.85333	0.0597462	0.0597462	0.0597462	Spn-ps	RefSeq	chr15	-	90891395	90898476	809	intergenic
AK156963	3.87377	0.606794	2.7548	0.0969654	0.830383	up	0	0	6	0	0	0	0.0597462	0.0597462	1.85333	0.0597462	0.0597462	0.0597462	TUname27245	Genbank	chr8	+	112547687	112549499	1812	intergenic
ENSMUST00000100397	3.87377	0.606794	2.7548	0.0969654	0.830383	up	0	0	6	0	0	0	0.0597462	0.0597462	1.85333	0.0597462	0.0597462	0.0597462	Gm10849	Ensembl	chr2	-	14603989	14604611	618	natural antisense	NM_023116	Cacnb2	+	14604305	14987908
ENSMUST00000129033	3.87377	0.606794	2.7548	0.0969654	0.830383	up	0	0	6	0	0	0	0.0597462	0.0597462	1.85333	0.0597462	0.0597462	0.0597462	Arpc1b	Ensembl	chr5	+	145114257	145122795	431	exon sense-overlapping	ENSMUST00000141602	Arpc1b	+	145114315	145122635
ENSMUST00000123911	3.87377	0.606794	2.7548	0.0969654	0.830383	up	0	0	6	0	0	0	0.0597462	0.0597462	1.85333	0.0597462	0.0597462	0.0597462	Gm13470	Ensembl	chr2	-	46419534	46442710	421	intergenic
ENSMUST00000172331	3.87377	0.606794	2.7548	0.0969654	0.830383	up	0	0	6	0	0	0	0.0597462	0.0597462	1.85333	0.0597462	0.0597462	0.0597462	Lect1	Ensembl	chr14	-	79641476	79645510	459	exon sense-overlapping	NM_010701	Lect1	-	79637689	79662170
ENSMUST00000180801	3.87377	0.606794	2.7548	0.0969654	0.830383	up	0	0	6	0	0	0	0.0597462	0.0597462	1.85333	0.0597462	0.0597462	0.0597462	Gm26554	Ensembl	chr7	+	29853084	29859025	880	intronic antisense	NM_173738	Zfp940	-	29843935	29853648
uc012abl.1	3.87377	0.606794	2.7548	0.0969654	0.830383	up	0	0	6	0	0	0	0.0597462	0.0597462	1.85333	0.0597462	0.0597462	0.0597462	Efcab1	UCSC_knowngene	chr16	+	14906645	14924522	1185	exon sense-overlapping	NM_025769	Efcab1	+	14906645	14924522
ENSMUST00000131961	3.87377	0.606794	2.7548	0.0969654	0.830383	up	0	0	6	0	0	0	0.0597462	0.0597462	1.85333	0.0597462	0.0597462	0.0597462	Gm14010	Ensembl	chr2	+	128423653	128424565	374	intergenic
ENSMUST00000147438	3.87377	0.606794	2.7548	0.0969654	0.830383	up	0	0	6	0	0	0	0.0597462	0.0597462	1.85333	0.0597462	0.0597462	0.0597462	Gm11551	Ensembl	chr11	+	101886236	101891206	410	intronic antisense	NM_010791	Meox1	-	101877509	101894354
ENSMUST00000168037	3.87377	0.606794	2.7548	0.0969654	0.830383	up	0	0	6	0	0	0	0.0597462	0.0597462	1.85333	0.0597462	0.0597462	0.0597462	Depdc1b	Ensembl	chr13	+	108316367	108324477	674	exon sense-overlapping	NM_178683	Depdc1b	+	108316336	108389557
AK136179	3.87377	0.606794	2.7548	0.0969654	0.830383	up	0	0	6	0	0	0	0.0597462	0.0597462	1.85333	0.0597462	0.0597462	0.0597462	TUname29914	Genbank	chr3	-	82660374	82663255	2884	intergenic
uc007tcv.1	3.87377	0.606794	2.7548	0.0969654	0.830383	up	0	0	6	0	0	0	0.0597462	0.0597462	1.85333	0.0597462	0.0597462	0.0597462	AK138450	UCSC_knowngene	chr14	+	43089444	43095778	594	intergenic
uc008nsn.1	3.87377	0.606794	2.7548	0.0969654	0.830383	up	0	0	6	0	0	0	0.0597462	0.0597462	1.85333	0.0597462	0.0597462	0.0597462	AK082432	UCSC_knowngene	chr2	+	163122621	163144265	954	intergenic
AK016204	3.87377	0.606794	2.7548	0.0969654	0.830383	up	0	0	6	0	0	0	0.0597462	0.0597462	1.85333	0.0597462	0.0597462	0.0597462	TUname58278	Genbank	chr4	+	138677767	138679001	1236	intergenic
ENSMUST00000137000	3.87377	0.606794	2.7548	0.0969654	0.830383	up	0	0	6	0	0	0	0.0597462	0.0597462	1.85333	0.0597462	0.0597462	0.0597462	Gm15927	Ensembl	chr7	-	3644097	3644577	397	bidirectional	NM_146176	Cnot3	+	3645268	3661109
ENSMUST00000156939	3.87377	0.606794	2.7548	0.0969654	0.830383	up	0	0	6	0	0	0	0.0597462	0.0597462	1.85333	0.0597462	0.0597462	0.0597462	Ada	Ensembl	chr2	-	163730014	163730866	550	exon sense-overlapping	NM_007398	Ada	-	163726570	163750239
uc009lsw.1	3.87377	0.606794	2.7548	0.0969654	0.830383	up	0	0	6	0	0	0	0.0597462	0.0597462	1.85333	0.0597462	0.0597462	0.0597462	AK019137	UCSC_knowngene	chr8	+	57505814	57508877	2444	intergenic
AK156857	3.87377	0.606794	2.7548	0.0969654	0.830383	up	0	0	6	0	0	0	0.0597462	0.0597462	1.85333	0.0597462	0.0597462	0.0597462	TUname58204	Genbank	chr11	-	48460577	48464253	3675	intergenic
ENSMUST00000110828	3.8675	1.47791	4.45739	0.0347525	0.830383	up	12	6	0	1	0	0	3.02219	2.12037	0.0597462	0.626355	0.0597462	0.0597462	Rad51	Ensembl	chr2	+	119112813	119133599	2849	exon sense-overlapping	ENSMUST00000140939	Rad51	+	119112792	119123846
ENSMUST00000146360	3.86546	0.566726	2.71995	0.0991035	0.830383	up	1	3	1	0	0	0	0.707016	1.43038	0.556593	0.0597462	0.0597462	0.0597462	Slc41a1	Ensembl	chr1	+	131842839	131846629	553	exon sense-overlapping	NM_173865	Slc41a1	+	131828011	131848864
AK144259	3.86546	0.566726	2.71995	0.0991035	0.830383	up	1	3	1	0	0	0	0.707016	1.43038	0.556593	0.0597462	0.0597462	0.0597462	TUname50730	Genbank	chr19	-	54680479	54685076	4596	intergenic
ENSMUST00000147259	3.85019	0.564433	2.70447	0.10007	0.830383	up	0	4	1	0	0	0	0.0597462	1.69872	0.556593	0.0597462	0.0597462	0.0597462	Mycl	Ensembl	chr4	+	122999338	123000517	670	exon sense-overlapping	NM_008506	Mycl	+	122996098	123002480
ENSMUST00000181957	3.85019	0.564433	2.70447	0.10007	0.830383	up	0	4	1	0	0	0	0.0597462	1.69872	0.556593	0.0597462	0.0597462	0.0597462	Gm26870	Ensembl	chr9	-	3024047	3038313	1170	natural antisense	ENSMUST00000177969	Gm10715	+	3037110	3038316
ENSMUST00000149562	3.85019	0.564433	2.70447	0.10007	0.830383	up	0	4	1	0	0	0	0.0597462	1.69872	0.556593	0.0597462	0.0597462	0.0597462	Gm16235	Ensembl	chr10	-	88445153	88445934	206	natural antisense	NM_001004164	Gnptab	+	88379411	88447329
ENSMUST00000159214	3.85019	0.564433	2.70447	0.10007	0.830383	up	0	4	1	0	0	0	0.0597462	1.69872	0.556593	0.0597462	0.0597462	0.0597462	Acot12	Ensembl	chr13	+	91779327	91784904	782	exon sense-overlapping	NM_028790	Acot12	+	91741520	91786148
ENSMUST00000119994	3.85019	0.564433	2.70447	0.10007	0.830383	up	0	4	1	0	0	0	0.0597462	1.69872	0.556593	0.0597462	0.0597462	0.0597462	Gm9085	Ensembl	chrX	-	20382749	20383821	1072	intronic antisense	NM_133669	Rp2h	+	20364607	20400349
AK052977	3.85019	0.564433	2.70447	0.10007	0.830383	up	0	4	1	0	0	0	0.0597462	1.69872	0.556593	0.0597462	0.0597462	0.0597462	TUname52929	Genbank	chr3	-	41163047	41172663	1370	intergenic
AK084852	3.85019	0.564433	2.70447	0.10007	0.830383	up	0	4	1	0	0	0	0.0597462	1.69872	0.556593	0.0597462	0.0597462	0.0597462	TUname16984	Genbank	chr6	+	73012042	73020360	3517	natural antisense	ENSMUST00000114040	Dnah6	-	73017608	73221651
NR_038153	3.85019	0.564433	2.70447	0.10007	0.830383	up	0	4	1	0	0	0	0.0597462	1.69872	0.556593	0.0597462	0.0597462	0.0597462	1810044D09Rik	RefSeq	chr6	+	91440986	91441755	500	intergenic
ENSMUST00000119552	3.85019	0.564433	2.70447	0.10007	0.830383	up	0	4	1	0	0	0	0.0597462	1.69872	0.556593	0.0597462	0.0597462	0.0597462	Gm13804	Ensembl	chr2	+	98291402	98291574	172	intergenic
AK079458	3.85019	0.564433	2.70447	0.10007	0.830383	up	0	4	1	0	0	0	0.0597462	1.69872	0.556593	0.0597462	0.0597462	0.0597462	TUname24568	Genbank	chr16	+	76383106	76398126	1281	intergenic
ENSMUST00000144938	3.84505	0.562652	2.69795	0.10048	0.830383	up	3	0	2	0	0	0	1.49196	0.0597462	0.925468	0.0597462	0.0597462	0.0597462	Nphp1	Ensembl	chr2	-	127740733	127744547	631	exon sense-overlapping	uc012cdq.1	Nphp1	-	127740915	127788854
ENSMUST00000143579	3.84505	0.562652	2.69795	0.10048	0.830383	up	3	0	2	0	0	0	1.49196	0.0597462	0.925468	0.0597462	0.0597462	0.0597462	Entpd3	Ensembl	chr9	+	120558033	120560954	843	exon sense-overlapping	NM_178676	Entpd3	+	120539817	120568326
ENSMUST00000086918	3.84505	0.562652	2.69795	0.10048	0.830383	up	3	0	2	0	0	0	1.49196	0.0597462	0.925468	0.0597462	0.0597462	0.0597462	Gm5560	Ensembl	chr5	+	97264827	97265719	892	intergenic
ENSMUST00000140913	3.84505	0.562652	2.69795	0.10048	0.830383	up	3	0	2	0	0	0	1.49196	0.0597462	0.925468	0.0597462	0.0597462	0.0597462	Abca4	Ensembl	chr3	+	122120040	122128657	1197	exon sense-overlapping	NM_007378	Abca4	+	122044459	122180061
ENSMUST00000181989	3.83864	1.54119	4.61295	0.0317332	0.830383	up	6	4	11	0	0	1	2.19633	1.69872	2.52504	0.0597462	0.0597462	0.718048	Arhgap12	Ensembl	chr18	-	6064358	6135941	679	exon sense-overlapping	NM_029277	Arhgap12	-	6024449	6136098
ENSMUST00000147868	3.82963	0.560359	2.68242	0.101464	0.830383	up	2	1	2	0	0	0	1.15223	0.671968	0.925468	0.0597462	0.0597462	0.0597462	Gm14097	Ensembl	chr2	-	132694431	132698523	470	intronic antisense	ENSMUST00000148271	1110034G24Rik	+	132690156	132750503
ENSMUST00000182346	3.82963	0.560359	2.68242	0.101464	0.830383	up	2	1	2	0	0	0	1.15223	0.671968	0.925468	0.0597462	0.0597462	0.0597462	Gm9081	Ensembl	chr10	+	122169372	122170363	991	intergenic
ENSMUST00000133886	3.81413	0.558067	2.66687	0.10246	0.830383	up	1	2	2	0	0	0	0.707016	1.10044	0.925468	0.0597462	0.0597462	0.0597462	Pask	Ensembl	chr1	-	93309837	93313148	912	exon sense-overlapping	NM_080850	Pask	-	93309436	93342788
ENSMUST00000140884	3.81413	0.558067	2.66687	0.10246	0.830383	up	1	2	2	0	0	0	0.707016	1.10044	0.925468	0.0597462	0.0597462	0.0597462	March8	Ensembl	chr6	+	116350891	116401122	373	exon sense-overlapping	ENSMUST00000135901	March8	+	116386223	116406224
NR_040352	3.79875	1.55276	4.58439	0.0322664	0.830383	up	0	1	22	0	0	1	0.0597462	0.671968	3.38812	0.0597462	0.0597462	0.718048	5430421F17Rik	RefSeq	chr8	-	25302649	25306270	2295	intergenic
BG969265_1	3.79854	0.555777	2.65132	0.103467	0.830383	up	0	3	2	0	0	0	0.0597462	1.43038	0.925468	0.0597462	0.0597462	0.0597462
ENSMUST00000124879	3.79854	0.555777	2.65132	0.103467	0.830383	up	0	3	2	0	0	0	0.0597462	1.43038	0.925468	0.0597462	0.0597462	0.0597462	Adam11	Ensembl	chr11	+	102762088	102771474	514	exon sense-overlapping	NM_001110778	Adam11	+	102761438	102780262
TCONS_00022770	3.79854	0.555777	2.65132	0.103467	0.830383	up	0	3	2	0	0	0	0.0597462	1.43038	0.925468	0.0597462	0.0597462	0.0597462	XLOC_016895	Alexander et al 2013	chr4	+	129623610	129624092	347	natural antisense	ENSMUST00000150357	Ccdc28b	-	129621002	129623886
ENSMUST00000154106	3.79566	1.48128	4.33367	0.0373676	0.830383	up	0	9	11	1	0	0	0.0597462	2.58519	2.52504	0.626355	0.0597462	0.0597462	Tomm40l	Ensembl	chr1	-	171221086	171222432	550	exon sense-overlapping	ENSMUST00000111327	Tomm40l	-	171217801	171222184
ENSMUST00000157051	3.79318	1.42854	4.14241	0.0418238	0.830383	up	15	1	1	0	1	0	3.30661	0.671968	0.556593	0.0597462	0.621297	0.0597462	Mto1	Ensembl	chr9	+	78464698	78470741	415	exon sense-overlapping	ENSMUST00000133002	Mto1	+	78464991	78475348
ENSMUST00000156777	3.78526	1.99493	7.20634	0.00726559	0.812477	up	8	19	4	0	2	0	2.52693	3.52489	1.46274	0.0597462	1.02449	0.0597462	Ppp1r8	Ensembl	chr4	-	132828967	132832975	694	exon sense-overlapping	ENSMUST00000105919	Ppp1r8	-	132827826	132843123
ENSMUST00000160932	3.77745	0.551704	2.62906	0.104926	0.830383	up	2	0	3	0	0	0	1.15223	0.0597462	1.21897	0.0597462	0.0597462	0.0597462	Airn	Ensembl	chr17	+	12741310	12860122	842	intronic antisense	NM_008552	Mas1	-	12841004	12868143
uc009qha.2	3.77745	0.551704	2.62906	0.104926	0.830383	up	2	0	3	0	0	0	1.15223	0.0597462	1.21897	0.0597462	0.0597462	0.0597462	DQ689436	UCSC_knowngene	chr9	-	67704460	67704493	33	intergenic
ENSMUST00000126340	3.77745	0.551704	2.62906	0.104926	0.830383	up	2	0	3	0	0	0	1.15223	0.0597462	1.21897	0.0597462	0.0597462	0.0597462	Dcdc5	Ensembl	chr2	+	106003335	106040626	396	natural antisense	NM_026992	Dnajc24	-	105966707	106003549
ENSMUST00000122992	3.77745	0.551704	2.62906	0.104926	0.830383	up	2	0	3	0	0	0	1.15223	0.0597462	1.21897	0.0597462	0.0597462	0.0597462	Chd3	Ensembl	chr11	-	69343272	69348610	2153	exon sense-overlapping	ENSMUST00000092971	Chd3	-	69344350	69369391
ENSMUST00000149929	3.76888	1.4836	4.26381	0.0389345	0.830383	up	11	1	7	0	0	1	2.91339	0.671968	2.01501	0.0597462	0.0597462	0.718048	Ticam2	Ensembl	chr18	-	46571212	46574533	2010	exon sense-overlapping	NM_173394	Ticam2	-	46558230	46574533
ENSMUST00000131603	3.76577	1.46849	4.20569	0.0402907	0.830383	up	4	14	0	0	0	1	1.76674	3.13023	0.0597462	0.0597462	0.0597462	0.718048	Gm14051	Ensembl	chr2	+	132144532	132220250	377	intronic antisense	NM_018824	Slc23a2	-	132052495	132145108
ENSMUST00000133920	3.76162	0.549415	2.61346	0.105963	0.830383	up	1	1	3	0	0	0	0.707016	0.671968	1.21897	0.0597462	0.0597462	0.0597462	Map2k6	Ensembl	chr11	+	110479038	110497926	1074	exon sense-overlapping	NM_011943	Map2k6	+	110399121	110513637
ENSMUST00000151478	3.76162	0.549415	2.61346	0.105963	0.830383	up	1	1	3	0	0	0	0.707016	0.671968	1.21897	0.0597462	0.0597462	0.0597462	Snx29	Ensembl	chr16	+	11445184	11631727	633	exon sense-overlapping	NM_028964	Snx29	+	11322903	11755473
ENSMUST00000142552	3.75453	2.37821	10.2743	0.00134937	0.389882	up	26	0	19	0	3	0	4.03439	0.0597462	3.19911	0.0597462	1.33926	0.0597462	Qrfpr	Ensembl	chr3	-	36187804	36222180	853	exon sense-overlapping	NM_198192	Qrfpr	-	36179425	36222275
ENSMUST00000132403	3.75225	1.41307	4.01673	0.0450533	0.830383	up	10	5	2	0	1	0	2.79571	1.9249	0.925468	0.0597462	0.621297	0.0597462	Atm	Ensembl	chr9	-	53521846	53536673	1243	exon sense-overlapping	uc012gtj.1	Atm	-	53437121	53533966
ENSMUST00000130746	3.7457	0.547128	2.59785	0.107012	0.830383	up	0	2	3	0	0	0	0.0597462	1.10044	1.21897	0.0597462	0.0597462	0.0597462	4930412M03Rik	Ensembl	chr11	-	60112218	60115230	1111	intronic antisense	NM_009021	Rai1	+	60105012	60199195
ENSMUST00000160402	3.7457	0.547128	2.59785	0.107012	0.830383	up	0	2	3	0	0	0	0.0597462	1.10044	1.21897	0.0597462	0.0597462	0.0597462	Gstcd	Ensembl	chr3	-	132996110	133005677	639	exon sense-overlapping	NM_026231	Gstcd	-	132982550	133091740
ENSMUST00000174330	3.7457	0.547128	2.59785	0.107012	0.830383	up	0	2	3	0	0	0	0.0597462	1.10044	1.21897	0.0597462	0.0597462	0.0597462	Dhx16	Ensembl	chr17	+	35887941	35888741	562	exon sense-overlapping	NM_026987	Dhx16	+	35879777	35892668
ENSMUST00000149895	3.7457	0.547128	2.59785	0.107012	0.830383	up	0	2	3	0	0	0	0.0597462	1.10044	1.21897	0.0597462	0.0597462	0.0597462	Toe1	Ensembl	chr4	-	116805710	116807606	659	natural antisense	ENSMUST00000106459	Tesk2	+	116720968	116805956
ENSMUST00000120930	3.73505	1.44065	4.08021	0.0433904	0.830383	up	0	9	10	0	1	0	0.0597462	2.58519	2.41342	0.0597462	0.621297	0.0597462	Gm14908	Ensembl	chrX	+	112464860	112466625	1286	intergenic
AK045957	3.71716	1.95074	6.74112	0.00942265	0.830383	up	4	21	5	0	2	0	1.76674	3.65678	1.67121	0.0597462	1.02449	0.0597462	TUname27035	Genbank	chr3	+	16427451	16429629	2180	intergenic
ENSMUST00000154168	3.71558	1.41606	3.96192	0.0465428	0.830383	up	6	4	8	0	1	0	2.19633	1.69872	2.16039	0.0597462	0.621297	0.0597462	Atad5	Ensembl	chr11	+	80103002	80108508	550	exon sense-overlapping	NM_001029856	Atad5	+	80089399	80135791
TCONS_00000305	3.71475	1.43111	3.98297	0.0459647	0.830383	up	10	7	0	0	0	1	2.79571	2.29249	0.0597462	0.0597462	0.0597462	0.718048	XLOC_000606	Alexander et al 2013	chr1	+	169762192	169763602	527	intergenic
ENSMUST00000135873	3.70791	0.540771	2.55975	0.109618	0.830383	up	1	0	4	0	0	0	0.707016	0.0597462	1.46274	0.0597462	0.0597462	0.0597462	Gm16075	Ensembl	chr11	+	75860968	75861494	361	intronic antisense	ENSMUST00000121287	Rph3al	-	75830998	75937738
ENSMUST00000133771	3.70791	0.540771	2.55975	0.109618	0.830383	up	1	0	4	0	0	0	0.707016	0.0597462	1.46274	0.0597462	0.0597462	0.0597462	Lins	Ensembl	chr7	+	66689970	66714747	2719	exon sense-overlapping	ENSMUST00000132351	Lins	+	66708177	66710375
ENSMUST00000182805	3.70791	0.540771	2.55975	0.109618	0.830383	up	1	0	4	0	0	0	0.707016	0.0597462	1.46274	0.0597462	0.0597462	0.0597462	Rnf165	Ensembl	chr18	-	77462892	77467148	408	exon sense-overlapping	ENSMUST00000182153	Rnf165	-	77466736	77565050
ENSMUST00000131004	3.70791	0.540771	2.55975	0.109618	0.830383	up	1	0	4	0	0	0	0.707016	0.0597462	1.46274	0.0597462	0.0597462	0.0597462	Nphs1	Ensembl	chr7	+	30486254	30486988	645	exon sense-overlapping	NM_019459	Nphs1	+	30460057	30488609
ENSMUST00000166647	3.70791	0.540771	2.55975	0.109618	0.830383	up	1	0	4	0	0	0	0.707016	0.0597462	1.46274	0.0597462	0.0597462	0.0597462	Coro1c	Ensembl	chr5	-	113848552	113874648	748	exon sense-overlapping	ENSMUST00000163264	Coro1c	-	113865700	113882945
NR_028592	3.70791	0.540771	2.55975	0.109618	0.830383	up	1	0	4	0	0	0	0.707016	0.0597462	1.46274	0.0597462	0.0597462	0.0597462	Gm10069	RefSeq	chr6	+	128438756	128475845	3922	bidirectional	NM_010219	Fkbp4	-	128430106	128438631
AK157559	3.70791	0.540771	2.55975	0.109618	0.830383	up	1	0	4	0	0	0	0.707016	0.0597462	1.46274	0.0597462	0.0597462	0.0597462	TUname10728	Genbank	chr14	+	64314076	64317679	3604	intronic antisense	uc007uik.1	Msra	-	64282904	64441026
AK011538	3.70791	0.540771	2.55975	0.109618	0.830383	up	1	0	4	0	0	0	0.707016	0.0597462	1.46274	0.0597462	0.0597462	0.0597462	TUname49127	Genbank	chr6	-	120835396	120836074	685	bidirectional	NM_153516	Bcl2l13	+	120836229	120892842
TCONS_00009537	3.70791	0.540771	2.55975	0.109618	0.830383	up	1	0	4	0	0	0	0.707016	0.0597462	1.46274	0.0597462	0.0597462	0.0597462	XLOC_007204	Alexander et al 2013	chr14	+	52419071	52420446	580	intergenic
ENSMUST00000172960	3.70791	0.540771	2.55975	0.109618	0.830383	up	1	0	4	0	0	0	0.707016	0.0597462	1.46274	0.0597462	0.0597462	0.0597462	Psmb8	Ensembl	chr17	+	34198608	34201425	1907	exon sense-overlapping	ENSMUST00000173441	Psmb8	+	34197720	34200918
TCONS_00004252	3.70791	0.540771	2.55975	0.109618	0.830383	up	1	0	4	0	0	0	0.707016	0.0597462	1.46274	0.0597462	0.0597462	0.0597462	XLOC_003929	Alexander et al 2013	chr11	-	20027401	20029639	1482	intergenic
uc009llh.1	3.70791	0.540771	2.55975	0.109618	0.830383	up	1	0	4	0	0	0	0.707016	0.0597462	1.46274	0.0597462	0.0597462	0.0597462	AK039009	UCSC_knowngene	chr8	+	36159478	36161588	1405	intergenic
TCONS_00004124	3.70791	0.540771	2.55975	0.109618	0.830383	up	1	0	4	0	0	0	0.707016	0.0597462	1.46274	0.0597462	0.0597462	0.0597462	XLOC_003626	Alexander et al 2013	chr11	+	102097232	102098019	693	intergenic
ENSMUST00000155185	3.70791	0.540771	2.55975	0.109618	0.830383	up	1	0	4	0	0	0	0.707016	0.0597462	1.46274	0.0597462	0.0597462	0.0597462	C130080G10Rik	Ensembl	chr2	+	114056312	114064868	954	intergenic
BY724061	3.70791	0.540771	2.55975	0.109618	0.830383	up	1	0	4	0	0	0	0.707016	0.0597462	1.46274	0.0597462	0.0597462	0.0597462	TUname63787	Genbank	chr18	-	30084611	30155636	641	intergenic
ENSMUST00000130503	3.70217	1.42535	3.9415	0.047111	0.830383	up	14	1	2	0	0	1	3.21789	0.671968	0.925468	0.0597462	0.0597462	0.718048	Smu1	Ensembl	chr4	-	40743583	40757883	1523	exon sense-overlapping	NM_021535	Smu1	-	40735648	40757885
ENSMUST00000119071	3.69166	0.538486	2.54411	0.110709	0.830383	up	0	1	4	0	0	0	0.0597462	0.671968	1.46274	0.0597462	0.0597462	0.0597462	Gm12421	Ensembl	chr4	-	84428817	84429124	307	intron sense-overlapping	ENSMUST00000175969	Bnc2	-	84293603	84674997
AK015787	3.69166	0.538486	2.54411	0.110709	0.830383	up	0	1	4	0	0	0	0.0597462	0.671968	1.46274	0.0597462	0.0597462	0.0597462	TUname57903	Genbank	chr8	-	14910589	14911492	904	bidirectional	ENSMUST00000110800	Arhgef10	+	14911737	15001085
TCONS_00034175	3.69166	0.538486	2.54411	0.110709	0.830383	up	0	1	4	0	0	0	0.0597462	0.671968	1.46274	0.0597462	0.0597462	0.0597462	XLOC_025843	Alexander et al 2013	chr9	-	56775535	56797256	1467	intergenic
uc009pyr.1	3.69166	0.538486	2.54411	0.110709	0.830383	up	0	1	4	0	0	0	0.0597462	0.671968	1.46274	0.0597462	0.0597462	0.0597462	AK168746	UCSC_knowngene	chr9	-	59826256	59941077	1387	natural antisense	NM_173018	Myo9a	+	59751173	59928866
uc009qhg.1	3.69166	0.538486	2.54411	0.110709	0.830383	up	0	1	4	0	0	0	0.0597462	0.671968	1.46274	0.0597462	0.0597462	0.0597462	DQ685109	UCSC_knowngene	chr9	-	67705674	67705715	41	intergenic
TCONS_00006729	3.69166	0.538486	2.54411	0.110709	0.830383	up	0	1	4	0	0	0	0.0597462	0.671968	1.46274	0.0597462	0.0597462	0.0597462	XLOC_005074	Alexander et al 2013	chr12	+	50985298	50987604	106	intergenic
uc007xcy.2	3.69166	0.538486	2.54411	0.110709	0.830383	up	0	1	4	0	0	0	0.0597462	0.671968	1.46274	0.0597462	0.0597462	0.0597462	Ribc2	UCSC_knowngene	chr15	+	85132098	85144569	1764	exon sense-overlapping	NM_026357	Ribc2	+	85132098	85144569
ENSMUST00000126923	3.69166	0.538486	2.54411	0.110709	0.830383	up	0	1	4	0	0	0	0.0597462	0.671968	1.46274	0.0597462	0.0597462	0.0597462	Fbxl8	Ensembl	chr8	+	105264681	105269170	1913	exon sense-overlapping	NM_015821	Fbxl8	+	105264647	105269326
ENSMUST00000123230	3.69166	0.538486	2.54411	0.110709	0.830383	up	0	1	4	0	0	0	0.0597462	0.671968	1.46274	0.0597462	0.0597462	0.0597462	Hsd17b7	Ensembl	chr1	-	169959452	169966149	593	exon sense-overlapping	ENSMUST00000111353	Hsd17b7	-	169955500	169969241
ENSMUST00000146163	3.69166	0.538486	2.54411	0.110709	0.830383	up	0	1	4	0	0	0	0.0597462	0.671968	1.46274	0.0597462	0.0597462	0.0597462	Map3k14	Ensembl	chr11	-	103220804	103221847	734	exon sense-overlapping	NM_016896	Map3k14	-	103219763	103267401
AK078447	3.69166	0.538486	2.54411	0.110709	0.830383	up	0	1	4	0	0	0	0.0597462	0.671968	1.46274	0.0597462	0.0597462	0.0597462	TUname11908	Genbank	chr18	+	44821768	44825059	3293	intergenic
ENSMUST00000148357	3.69166	0.538486	2.54411	0.110709	0.830383	up	0	1	4	0	0	0	0.0597462	0.671968	1.46274	0.0597462	0.0597462	0.0597462	Gm16192	Ensembl	chr8	+	41039755	41042053	937	natural antisense	NM_001005865	Mtus1	-	40990911	41041911
uc008skw.2	3.69166	0.538486	2.54411	0.110709	0.830383	up	0	1	4	0	0	0	0.0597462	0.671968	1.46274	0.0597462	0.0597462	0.0597462	DQ724032	UCSC_knowngene	chr4	+	42025449	42025485	36	intergenic
AK156064	3.68108	1.97158	6.75744	0.00933684	0.830383	up	1	1	33	0	2	0	0.707016	0.671968	3.92439	0.0597462	1.02449	0.0597462	TUname60502	Genbank	chr3	+	18299309	18304139	4830	intergenic
ENSMUST00000159812	3.67242	1.38389	3.78138	0.051828	0.830383	up	1	12	4	0	1	0	0.707016	2.93618	1.46274	0.0597462	0.621297	0.0597462	Lmo7	Ensembl	chr14	+	101869469	101884217	481	exon sense-overlapping	ENSMUST00000159314	Lmo7	+	101840647	101934687
ENSMUST00000133497	3.671	1.38378	3.7769	0.0519672	0.830383	up	8	3	6	1	0	0	2.52693	1.43038	1.85333	0.626355	0.0597462	0.0597462	Kif24	Ensembl	chr4	-	41447323	41464846	623	exon sense-overlapping	ENSMUST00000154535	Kif24	-	41428533	41464846
ENSMUST00000127088	3.66947	0.493084	2.49448	0.114248	0.830383	up	4	0	0	0	0	0	1.76674	0.0597462	0.0597462	0.0597462	0.0597462	0.0597462	Megf6	Ensembl	chr4	+	154264614	154275184	3378	exon sense-overlapping	ENSMUST00000152159	Megf6	+	154237524	154271739
ENSMUST00000141676	3.66947	0.493084	2.49448	0.114248	0.830383	up	4	0	0	0	0	0	1.76674	0.0597462	0.0597462	0.0597462	0.0597462	0.0597462	Arr3	Ensembl	chrX	+	100605543	100613073	749	exon sense-overlapping	NM_133205	Arr3	+	100605496	100618493
ENSMUST00000172623	3.66947	0.493084	2.49448	0.114248	0.830383	up	4	0	0	0	0	0	1.76674	0.0597462	0.0597462	0.0597462	0.0597462	0.0597462	Gm20462	Ensembl	chr17	-	34567729	34568137	408	intronic antisense	NM_010929	Notch4	+	34564294	34588543
AK133098	3.66947	0.493084	2.49448	0.114248	0.830383	up	4	0	0	0	0	0	1.76674	0.0597462	0.0597462	0.0597462	0.0597462	0.0597462	TUname36560	Genbank	chr7	-	82172664	82174704	2040	natural antisense	ENSMUST00000180183	Sh3gl3	+	82174194	82284095
ENSMUST00000138698	3.66947	0.493084	2.49448	0.114248	0.830383	up	4	0	0	0	0	0	1.76674	0.0597462	0.0597462	0.0597462	0.0597462	0.0597462	Tsc22d4	Ensembl	chr5	+	137767689	137768282	511	exon sense-overlapping	NM_029805	Tsc22d4	+	137745968	137768453
ENSMUST00000124094	3.66947	0.493084	2.49448	0.114248	0.830383	up	4	0	0	0	0	0	1.76674	0.0597462	0.0597462	0.0597462	0.0597462	0.0597462	Itsn1	Ensembl	chr16	+	91804621	91816917	442	exon sense-overlapping	ENSMUST00000064797	Itsn1	+	91729352	91913988
TCONS_00036228	3.66947	0.493084	2.49448	0.114248	0.830383	up	4	0	0	0	0	0	1.76674	0.0597462	0.0597462	0.0597462	0.0597462	0.0597462	XLOC_027236	Alexander et al 2013	chrX	-	101575164	101586894	3258	intronic antisense	ENSMUST00000118878	Taf1	+	101532733	101601034
ENSMUST00000136486	3.66947	0.493084	2.49448	0.114248	0.830383	up	4	0	0	0	0	0	1.76674	0.0597462	0.0597462	0.0597462	0.0597462	0.0597462	Gm14641	Ensembl	chr2	-	171995940	172003995	452	intergenic
ENSMUST00000131966	3.66947	0.493084	2.49448	0.114248	0.830383	up	4	0	0	0	0	0	1.76674	0.0597462	0.0597462	0.0597462	0.0597462	0.0597462	Ccdc81	Ensembl	chr7	-	89866147	89903629	2788	exon sense-overlapping	NM_001162979	Ccdc81	-	89866147	89903629
ENSMUST00000136594	3.66947	0.493084	2.49448	0.114248	0.830383	up	4	0	0	0	0	0	1.76674	0.0597462	0.0597462	0.0597462	0.0597462	0.0597462	Arntl2	Ensembl	chr6	+	146820430	146823154	647	exon sense-overlapping	ENSMUST00000111636	Arntl2	+	146805529	146832646
ENSMUST00000137803	3.66947	0.493084	2.49448	0.114248	0.830383	up	4	0	0	0	0	0	1.76674	0.0597462	0.0597462	0.0597462	0.0597462	0.0597462	Tnfrsf14	Ensembl	chr4	-	154924473	154928552	689	exon sense-overlapping	ENSMUST00000152687	Tnfrsf14	-	154922260	154928552
ENSMUST00000147941	3.66947	0.493084	2.49448	0.114248	0.830383	up	4	0	0	0	0	0	1.76674	0.0597462	0.0597462	0.0597462	0.0597462	0.0597462	Oas2	Ensembl	chr5	-	120730335	120735575	2373	exon sense-overlapping	ENSMUST00000146101	Oas2	-	120733281	120738408
TCONS_00021100	3.66947	0.493084	2.49448	0.114248	0.830383	up	4	0	0	0	0	0	1.76674	0.0597462	0.0597462	0.0597462	0.0597462	0.0597462	XLOC_016195	Alexander et al 2013	chr3	-	129524478	129532205	653	bidirectional	NM_130450	Elovl6	+	129532385	129638493
ENSMUST00000129016	3.66947	0.493084	2.49448	0.114248	0.830383	up	4	0	0	0	0	0	1.76674	0.0597462	0.0597462	0.0597462	0.0597462	0.0597462	Rhbdd3	Ensembl	chr11	+	5100236	5106093	1707	exon sense-overlapping	ENSMUST00000134267	Rhbdd3	+	5099432	5103349
ENSMUST00000181441	3.66947	0.493084	2.49448	0.114248	0.830383	up	4	0	0	0	0	0	1.76674	0.0597462	0.0597462	0.0597462	0.0597462	0.0597462	Gm26567	Ensembl	chr9	+	88599655	89128550	785	intron sense-overlapping	ENSMUST00000085257	Gm10634	+	88793461	88806247
ENSMUST00000184377	3.66947	0.493084	2.49448	0.114248	0.830383	up	4	0	0	0	0	0	1.76674	0.0597462	0.0597462	0.0597462	0.0597462	0.0597462	4931440P22Rik	Ensembl	chr3	-	65515314	65529371	754	intronic antisense	NM_178892	Tiparp	+	65528446	65555518
ENSMUST00000135888	3.66947	0.493084	2.49448	0.114248	0.830383	up	4	0	0	0	0	0	1.76674	0.0597462	0.0597462	0.0597462	0.0597462	0.0597462	Il17rb	Ensembl	chr14	-	29996140	30008813	2009	exon sense-overlapping	ENSMUST00000122205	Il17rb	-	29996167	30008896
AK146921	3.66947	0.493084	2.49448	0.114248	0.830383	up	4	0	0	0	0	0	1.76674	0.0597462	0.0597462	0.0597462	0.0597462	0.0597462	TUname50837	Genbank	chr16	+	78649320	78650820	1499	intergenic
ENSMUST00000143800	3.66947	0.493084	2.49448	0.114248	0.830383	up	4	0	0	0	0	0	1.76674	0.0597462	0.0597462	0.0597462	0.0597462	0.0597462	Gm16515	Ensembl	chr11	-	60905953	60914750	355	exon sense-overlapping	NM_025294	Gm16515	-	60902245	60913792
ENSMUST00000149853	3.66947	0.493084	2.49448	0.114248	0.830383	up	4	0	0	0	0	0	1.76674	0.0597462	0.0597462	0.0597462	0.0597462	0.0597462	Phkg2	Ensembl	chr7	+	127582095	127582686	511	exon sense-overlapping	ENSMUST00000121004	Phkg2	+	127573528	127583305
ENSMUST00000177707	3.66947	0.493084	2.49448	0.114248	0.830383	up	4	0	0	0	0	0	1.76674	0.0597462	0.0597462	0.0597462	0.0597462	0.0597462	Tma7-ps	Ensembl	chr1	+	171711076	171711500	424	intergenic
ENSMUST00000127238	3.66947	0.493084	2.49448	0.114248	0.830383	up	4	0	0	0	0	0	1.76674	0.0597462	0.0597462	0.0597462	0.0597462	0.0597462	Acap1	Ensembl	chr11	-	69883482	69888417	2973	exon sense-overlapping	ENSMUST00000108622	Acap1	-	69881566	69890331
uc008pkt.1	3.66947	0.493084	2.49448	0.114248	0.830383	up	4	0	0	0	0	0	1.76674	0.0597462	0.0597462	0.0597462	0.0597462	0.0597462	AK144610	UCSC_knowngene	chr3	-	65829115	65872281	526	intronic antisense	NM_001166659	Lekr1	+	65666227	65831162
ENSMUST00000170200	3.66947	0.493084	2.49448	0.114248	0.830383	up	4	0	0	0	0	0	1.76674	0.0597462	0.0597462	0.0597462	0.0597462	0.0597462	Angpt2	Ensembl	chr8	-	18692086	18699547	652	exon sense-overlapping	NM_007426	Angpt2	-	18690262	18741562
uc029ros.1	3.66947	0.493084	2.49448	0.114248	0.830383	up	4	0	0	0	0	0	1.76674	0.0597462	0.0597462	0.0597462	0.0597462	0.0597462	DQ716292	UCSC_knowngene	chr11	+	103437192	103437239	47	intergenic
NR_027901	3.66947	0.493084	2.49448	0.114248	0.830383	up	4	0	0	0	0	0	1.76674	0.0597462	0.0597462	0.0597462	0.0597462	0.0597462	2900060B14Rik	RefSeq	chr1	-	118458668	118459265	597	exon sense-overlapping	ENSMUST00000097615	2900060B14Rik	-	118458669	118458747
ENSMUST00000146095	3.66947	0.493084	2.49448	0.114248	0.830383	up	4	0	0	0	0	0	1.76674	0.0597462	0.0597462	0.0597462	0.0597462	0.0597462	Eml2	Ensembl	chr7	+	19181605	19186371	593	exon sense-overlapping	ENSMUST00000120595	Eml2	+	19181158	19206482
TCONS_00008294	3.66947	0.493084	2.49448	0.114248	0.830383	up	4	0	0	0	0	0	1.76674	0.0597462	0.0597462	0.0597462	0.0597462	0.0597462	XLOC_006738	Alexander et al 2013	chr13	-	62913090	62917826	434	intergenic
ENSMUST00000124489	3.66947	0.493084	2.49448	0.114248	0.830383	up	4	0	0	0	0	0	1.76674	0.0597462	0.0597462	0.0597462	0.0597462	0.0597462	Gm13605	Ensembl	chr2	+	35224534	35226254	658	intergenic
ENSMUST00000134080	3.66947	0.493084	2.49448	0.114248	0.830383	up	4	0	0	0	0	0	1.76674	0.0597462	0.0597462	0.0597462	0.0597462	0.0597462	Ccnb1	Ensembl	chr13	-	100779608	100782033	1075	exon sense-overlapping	ENSMUST00000174038	Ccnb1	-	100779677	100786402
ENSMUST00000124255	3.66947	0.493084	2.49448	0.114248	0.830383	up	4	0	0	0	0	0	1.76674	0.0597462	0.0597462	0.0597462	0.0597462	0.0597462	Tex14	Ensembl	chr11	+	87543157	87555666	658	exon sense-overlapping	ENSMUST00000100657	Tex14	+	87539003	87555819
ENSMUST00000134613	3.66947	0.493084	2.49448	0.114248	0.830383	up	4	0	0	0	0	0	1.76674	0.0597462	0.0597462	0.0597462	0.0597462	0.0597462	Arfip2	Ensembl	chr7	-	105636901	105638045	469	exon sense-overlapping	ENSMUST00000084782	Arfip2	-	105635656	105640351
ENSMUST00000141270	3.66947	0.493084	2.49448	0.114248	0.830383	up	4	0	0	0	0	0	1.76674	0.0597462	0.0597462	0.0597462	0.0597462	0.0597462	Tbc1d14	Ensembl	chr5	-	36507938	36520487	820	exon sense-overlapping	ENSMUST00000126077	Tbc1d14	-	36490607	36531602
ENSMUST00000136617	3.66947	0.493084	2.49448	0.114248	0.830383	up	4	0	0	0	0	0	1.76674	0.0597462	0.0597462	0.0597462	0.0597462	0.0597462	Trp53bp1	Ensembl	chr2	-	121256513	121271369	751	exon sense-overlapping	ENSMUST00000131245	Trp53bp1	-	121216142	121271321
ENSMUST00000180176	3.66947	0.493084	2.49448	0.114248	0.830383	up	4	0	0	0	0	0	1.76674	0.0597462	0.0597462	0.0597462	0.0597462	0.0597462	Gm9457	Ensembl	chr8	-	4812816	4813212	396	intergenic
uc009pnd.1	3.66947	0.493084	2.49448	0.114248	0.830383	up	4	0	0	0	0	0	1.76674	0.0597462	0.0597462	0.0597462	0.0597462	0.0597462	DQ727320	UCSC_knowngene	chr9	-	54214912	54214943	31	intergenic
ENSMUST00000127574	3.66947	0.493084	2.49448	0.114248	0.830383	up	4	0	0	0	0	0	1.76674	0.0597462	0.0597462	0.0597462	0.0597462	0.0597462	Ermap	Ensembl	chr4	-	119177547	119189976	2855	exon sense-overlapping	ENSMUST00000124626	Ermap	-	119185752	119189951
uc008rsi.1	3.66947	0.493084	2.49448	0.114248	0.830383	up	4	0	0	0	0	0	1.76674	0.0597462	0.0597462	0.0597462	0.0597462	0.0597462	AK081104	UCSC_knowngene	chr3	+	151294125	151296641	921	intergenic
AK136366	3.66947	0.493084	2.49448	0.114248	0.830383	up	4	0	0	0	0	0	1.76674	0.0597462	0.0597462	0.0597462	0.0597462	0.0597462	TUname20698	Genbank	chr5	-	76812303	76814968	2666	intronic antisense	ENSMUST00000120818	C530008M17Rik	+	76809987	76842589
ENSMUST00000160273	3.66947	0.493084	2.49448	0.114248	0.830383	up	4	0	0	0	0	0	1.76674	0.0597462	0.0597462	0.0597462	0.0597462	0.0597462	Egflam	Ensembl	chr15	-	7233325	7398269	3327	exon sense-overlapping	NM_178748	Egflam	-	7206119	7398304
uc029rxa.1	3.66947	0.493084	2.49448	0.114248	0.830383	up	4	0	0	0	0	0	1.76674	0.0597462	0.0597462	0.0597462	0.0597462	0.0597462	DQ544503	UCSC_knowngene	chr12	+	98434202	98434233	31	natural antisense	uc007oqh.1	Kcnk10	-	98433993	98575127
ENSMUST00000120923	3.66947	0.493084	2.49448	0.114248	0.830383	up	4	0	0	0	0	0	1.76674	0.0597462	0.0597462	0.0597462	0.0597462	0.0597462	Gm11809	Ensembl	chr4	-	8672632	8673582	950	intergenic
uc029wxm.1	3.66947	0.493084	2.49448	0.114248	0.830383	up	4	0	0	0	0	0	1.76674	0.0597462	0.0597462	0.0597462	0.0597462	0.0597462	K00103	UCSC_knowngene	chr9	-	5659018	5659072	54	intergenic
AK080518	3.66947	0.493084	2.49448	0.114248	0.830383	up	4	0	0	0	0	0	1.76674	0.0597462	0.0597462	0.0597462	0.0597462	0.0597462	TUname24569	Genbank	chr1	+	189064894	189066433	1541	intergenic
TCONS_00025278	3.66947	0.493084	2.49448	0.114248	0.830383	up	4	0	0	0	0	0	1.76674	0.0597462	0.0597462	0.0597462	0.0597462	0.0597462	XLOC_019229	Alexander et al 2013	chr5	-	99021739	99022440	701	intron sense-overlapping	NM_008926	Prkg2	-	98929772	99037079
TCONS_00000430	3.66947	0.493084	2.49448	0.114248	0.830383	up	4	0	0	0	0	0	1.76674	0.0597462	0.0597462	0.0597462	0.0597462	0.0597462	XLOC_001054	Alexander et al 2013	chr1	-	86465879	86466239	252	intergenic
NR_045048	3.66947	0.493084	2.49448	0.114248	0.830383	up	4	0	0	0	0	0	1.76674	0.0597462	0.0597462	0.0597462	0.0597462	0.0597462	Gm19990	RefSeq	chr12	+	56253242	56266381	1221	intergenic
uc007oza.1	3.66947	0.493084	2.49448	0.114248	0.830383	up	4	0	0	0	0	0	1.76674	0.0597462	0.0597462	0.0597462	0.0597462	0.0597462	AK043332	UCSC_knowngene	chr12	+	105899840	105902021	1947	intergenic
ENSMUST00000143555	3.66947	0.493084	2.49448	0.114248	0.830383	up	4	0	0	0	0	0	1.76674	0.0597462	0.0597462	0.0597462	0.0597462	0.0597462	Gm16212	Ensembl	chr10	-	68026024	68026626	420	natural antisense	NM_001081346	Rtkn2	+	67979597	68043864
uc008dlu.1	3.66947	0.493084	2.49448	0.114248	0.830383	up	4	0	0	0	0	0	1.76674	0.0597462	0.0597462	0.0597462	0.0597462	0.0597462	AK146694	UCSC_knowngene	chr17	+	70967885	70971805	2943	intergenic
TCONS_00017544	3.66947	0.493084	2.49448	0.114248	0.830383	up	4	0	0	0	0	0	1.76674	0.0597462	0.0597462	0.0597462	0.0597462	0.0597462	XLOC_013679	Alexander et al 2013	chr2	+	168981163	168982486	991	intergenic
uc029rot.1	3.66947	0.493084	2.49448	0.114248	0.830383	up	4	0	0	0	0	0	1.76674	0.0597462	0.0597462	0.0597462	0.0597462	0.0597462	DQ560232	UCSC_knowngene	chr11	+	103437292	103437323	31	intergenic
ENSMUST00000180662	3.66947	0.493084	2.49448	0.114248	0.830383	up	4	0	0	0	0	0	1.76674	0.0597462	0.0597462	0.0597462	0.0597462	0.0597462	Gm2990	Ensembl	chr14	+	32465041	32483539	1109	intronic antisense	uc007syz.1	Chat	-	32454557	32465957
AK019048	3.66947	0.493084	2.49448	0.114248	0.830383	up	4	0	0	0	0	0	1.76674	0.0597462	0.0597462	0.0597462	0.0597462	0.0597462	TUname59465	Genbank	chr7	+	24666732	24666970	239	intergenic
NR_045641	3.66947	0.493084	2.49448	0.114248	0.830383	up	4	0	0	0	0	0	1.76674	0.0597462	0.0597462	0.0597462	0.0597462	0.0597462	F630111L10Rik	RefSeq	chr3	-	59146295	59153628	7333	exon sense-overlapping	uc008pin.1	P2ry14	-	59114624	59153492
ENSMUST00000122274	3.66947	0.493084	2.49448	0.114248	0.830383	up	4	0	0	0	0	0	1.76674	0.0597462	0.0597462	0.0597462	0.0597462	0.0597462	Gm6568	Ensembl	chrX	+	157540865	157541562	697	intergenic
AK087240	3.66947	0.493084	2.49448	0.114248	0.830383	up	4	0	0	0	0	0	1.76674	0.0597462	0.0597462	0.0597462	0.0597462	0.0597462	TUname46072	Genbank	chr7	-	113044254	113046607	2354	intergenic
ENSMUST00000147541	3.66947	0.493084	2.49448	0.114248	0.830383	up	4	0	0	0	0	0	1.76674	0.0597462	0.0597462	0.0597462	0.0597462	0.0597462	2810433D01Rik	Ensembl	chr11	-	102621317	102624366	490	intergenic
ENSMUST00000126700	3.66947	0.493084	2.49448	0.114248	0.830383	up	4	0	0	0	0	0	1.76674	0.0597462	0.0597462	0.0597462	0.0597462	0.0597462	Thbs3	Ensembl	chr3	+	89221151	89223176	455	exon sense-overlapping	ENSMUST00000119084	Thbs3	+	89215232	89226804
AK039169	3.66947	0.493084	2.49448	0.114248	0.830383	up	4	0	0	0	0	0	1.76674	0.0597462	0.0597462	0.0597462	0.0597462	0.0597462	TUname45938	Genbank	chr11	-	72686583	72688094	1510	intergenic
ENSMUST00000127815	3.66947	0.493084	2.49448	0.114248	0.830383	up	4	0	0	0	0	0	1.76674	0.0597462	0.0597462	0.0597462	0.0597462	0.0597462	1700001C02Rik	Ensembl	chr5	+	30466046	30480906	660	exon sense-overlapping	ENSMUST00000114743	1700001C02Rik	+	30466083	30484067
ENSMUST00000130731	3.66947	0.493084	2.49448	0.114248	0.830383	up	4	0	0	0	0	0	1.76674	0.0597462	0.0597462	0.0597462	0.0597462	0.0597462	Lrrc31	Ensembl	chr3	-	30698121	30699810	705	exon sense-overlapping	ENSMUST00000108263	Lrrc31	-	30682679	30699843
2_00011746	3.66947	0.493084	2.49448	0.114248	0.830383	up	4	0	0	0	0	0	1.76674	0.0597462	0.0597462	0.0597462	0.0597462	0.0597462	XLOC_006913	Lei Sun et al 2012	chr16	-	29847667	29849644	215	intergenic
ENSMUST00000174215	3.66947	0.493084	2.49448	0.114248	0.830383	up	4	0	0	0	0	0	1.76674	0.0597462	0.0597462	0.0597462	0.0597462	0.0597462	Aldh1a3	Ensembl	chr7	-	66408956	66425701	1066	exon sense-overlapping	NM_053080	Aldh1a3	-	66390892	66427477
ENSMUST00000120200	3.66947	0.493084	2.49448	0.114248	0.830383	up	4	0	0	0	0	0	1.76674	0.0597462	0.0597462	0.0597462	0.0597462	0.0597462	Gm11557	Ensembl	chr11	+	99678125	99679133	1008	intergenic
AK157669	3.66947	0.493084	2.49448	0.114248	0.830383	up	4	0	0	0	0	0	1.76674	0.0597462	0.0597462	0.0597462	0.0597462	0.0597462	TUname20873	Genbank	chr9	+	8462636	8463373	737	intergenic
uc008agn.1	3.66947	0.493084	2.49448	0.114248	0.830383	up	4	0	0	0	0	0	1.76674	0.0597462	0.0597462	0.0597462	0.0597462	0.0597462	AK207024	UCSC_knowngene	chr17	-	6351651	6361844	397	intron sense-overlapping	uc008agm.2	Dynlt1a	-	6310544	6493172
AK085419	3.66947	0.493084	2.49448	0.114248	0.830383	up	4	0	0	0	0	0	1.76674	0.0597462	0.0597462	0.0597462	0.0597462	0.0597462	TUname52055	Genbank	chr1	+	164577433	164578553	1120	intergenic
ENSMUST00000132485	3.66947	0.493084	2.49448	0.114248	0.830383	up	4	0	0	0	0	0	1.76674	0.0597462	0.0597462	0.0597462	0.0597462	0.0597462	Gm16206	Ensembl	chr3	+	53452618	53457797	1966	natural antisense	NM_172501	Nhlrc3	-	53451995	53463258
ENSMUST00000118061	3.66947	0.493084	2.49448	0.114248	0.830383	up	4	0	0	0	0	0	1.76674	0.0597462	0.0597462	0.0597462	0.0597462	0.0597462	Gm13812	Ensembl	chr2	-	100460187	100461534	1347	intergenic
ENSMUST00000139369	3.66947	0.493084	2.49448	0.114248	0.830383	up	4	0	0	0	0	0	1.76674	0.0597462	0.0597462	0.0597462	0.0597462	0.0597462	Lgr6	Ensembl	chr1	-	135003249	135022091	360	exon sense-overlapping	ENSMUST00000137968	Lgr6	-	134986354	135017779
uc029xck.1	3.66947	0.493084	2.49448	0.114248	0.830383	up	4	0	0	0	0	0	1.76674	0.0597462	0.0597462	0.0597462	0.0597462	0.0597462	DQ689568	UCSC_knowngene	chr9	-	67714800	67714830	30	intergenic
ENSMUST00000161841	3.66947	0.493084	2.49448	0.114248	0.830383	up	4	0	0	0	0	0	1.76674	0.0597462	0.0597462	0.0597462	0.0597462	0.0597462	Gm7097	Ensembl	chr10	-	70284234	70284953	491	natural antisense	NM_025807	Slc16a9	+	70245275	70285951
AK044066	3.66947	0.493084	2.49448	0.114248	0.830383	up	4	0	0	0	0	0	1.76674	0.0597462	0.0597462	0.0597462	0.0597462	0.0597462	TUname29706	Genbank	chr8	-	126057815	126060524	2711	intergenic
TCONS_00002315	3.66947	0.493084	2.49448	0.114248	0.830383	up	4	0	0	0	0	0	1.76674	0.0597462	0.0597462	0.0597462	0.0597462	0.0597462	XLOC_002073	Alexander et al 2013	chr10	+	126958090	126975499	100	intergenic
ENSMUST00000158351	3.66947	0.493084	2.49448	0.114248	0.830383	up	4	0	0	0	0	0	1.76674	0.0597462	0.0597462	0.0597462	0.0597462	0.0597462	Gm23759	Ensembl	chr9	+	90031306	90031574	268	intergenic
ENSMUST00000127592	3.66947	0.493084	2.49448	0.114248	0.830383	up	4	0	0	0	0	0	1.76674	0.0597462	0.0597462	0.0597462	0.0597462	0.0597462	Cd209c	Ensembl	chr8	-	3940293	3954746	652	exon sense-overlapping	NM_130903	Cd209c	-	3940221	3946863
ENSMUST00000184193	3.66947	0.493084	2.49448	0.114248	0.830383	up	4	0	0	0	0	0	1.76674	0.0597462	0.0597462	0.0597462	0.0597462	0.0597462	Tmem156	Ensembl	chr5	-	65054346	65075586	468	exon sense-overlapping	ENSMUST00000043352	Tmem156	-	65062544	65091584
TCONS_00032504	3.66947	0.493084	2.49448	0.114248	0.830383	up	4	0	0	0	0	0	1.76674	0.0597462	0.0597462	0.0597462	0.0597462	0.0597462	TUname26122	Alexander et al 2013	chr8	-	85606546	85607192	93	intergenic
ENSMUST00000136335	3.6596	1.91227	6.35619	0.0116985	0.830383	up	15	5	9	1	1	0	3.30661	1.9249	2.29245	0.626355	0.621297	0.0597462	Ccdc111	Ensembl	chr8	-	46576161	46617200	3943	exon sense-overlapping	ENSMUST00000125319	Ccdc111	-	46605148	46613015
ENSMUST00000153864	3.65673	1.93706	6.48683	0.0108688	0.830383	up	4	7	21	1	1	0	1.76674	2.29249	3.32783	0.626355	0.621297	0.0597462	Osbpl5	Ensembl	chr7	-	143713495	143740299	700	exon sense-overlapping	NM_001199227	Osbpl5	-	143688761	143740360
ENSMUST00000159143	3.65225	0.490735	2.47816	0.115439	0.830383	up	3	1	0	0	0	0	1.49196	0.671968	0.0597462	0.0597462	0.0597462	0.0597462	C1s	Ensembl	chr6	-	124536191	124540377	523	exon sense-overlapping	NM_001097617	C1s	-	124530343	124542359
ENSMUST00000118347	3.65225	0.490735	2.47816	0.115439	0.830383	up	3	1	0	0	0	0	1.49196	0.671968	0.0597462	0.0597462	0.0597462	0.0597462	Gm11268	Ensembl	chr4	+	82642399	82642666	267	intronic antisense	ENSMUST00000155821	Nfib	-	82498320	82705750
ENSMUST00000136542	3.64202	2.89943	15.8937	6.70404e-05	0.050068	up	11	18	44	2	1	2	2.91339	3.45412	4.31446	1.03213	0.621297	1.1684	Gm11772	Ensembl	chr11	-	120235233	120236122	532	intronic antisense	NM_198423	Bahcc1	+	120232946	120292297
ENSMUST00000183906	3.64162	1.35395	3.63204	0.0566795	0.830383	up	5	9	2	0	1	0	1.99747	2.58519	0.925468	0.0597462	0.621297	0.0597462	Gm21685	Ensembl	chr14	+	69555439	69568582	2946	exon sense-overlapping	ENSMUST00000064846	Gm21685	+	69555447	69568583
ENSMUST00000155097	3.6402	1.35381	3.6276	0.0568308	0.830383	up	12	0	4	1	0	0	3.02219	0.0597462	1.46274	0.626355	0.0597462	0.0597462	Dok7	Ensembl	chr5	+	35074957	35080964	2519	exon sense-overlapping	ENSMUST00000114270	Dok7	+	35056861	35080964
ENSMUST00000124627	3.63791	1.33229	3.55566	0.059345	0.830383	up	14	1	0	0	1	0	3.21789	0.671968	0.0597462	0.0597462	0.621297	0.0597462	Lpcat1	Ensembl	chr13	+	73510948	73511606	360	exon sense-overlapping	NM_145376	Lpcat1	+	73467382	73514538
ENSMUST00000100718	3.63643	0.529852	2.49016	0.114563	0.830383	up	0	0	5	0	0	0	0.0597462	0.0597462	1.67121	0.0597462	0.0597462	0.0597462	Rad51d	Ensembl	chr11	-	82878736	82890589	1386	exon sense-overlapping	ENSMUST00000021033	Rad51d	-	82878736	82890589
AK044309	3.63643	0.529852	2.49016	0.114563	0.830383	up	0	0	5	0	0	0	0.0597462	0.0597462	1.67121	0.0597462	0.0597462	0.0597462	TUname31758	Genbank	chr9	+	96705827	96711449	2816	intronic antisense	ENSMUST00000140121	Zbtb38	-	96687397	96719445
ENSMUST00000143940	3.63643	0.529852	2.49016	0.114563	0.830383	up	0	0	5	0	0	0	0.0597462	0.0597462	1.67121	0.0597462	0.0597462	0.0597462	Ttc18	Ensembl	chr14	-	20447359	20448701	409	exon sense-overlapping	NM_001163639	Ttc18	-	20394189	20452225
ENSMUST00000177231	3.63643	0.529852	2.49016	0.114563	0.830383	up	0	0	5	0	0	0	0.0597462	0.0597462	1.67121	0.0597462	0.0597462	0.0597462	Ebf2	Ensembl	chr14	+	67233602	67236513	2037	exon sense-overlapping	ENSMUST00000176029	Ebf2	+	67234643	67428687
ENSMUST00000132956	3.63643	0.529852	2.49016	0.114563	0.830383	up	0	0	5	0	0	0	0.0597462	0.0597462	1.67121	0.0597462	0.0597462	0.0597462	Lsp1	Ensembl	chr7	+	142474993	142486504	729	exon sense-overlapping	NM_001271509	Lsp1	+	142460811	142494868
ENSMUST00000132606	3.63643	0.529852	2.49016	0.114563	0.830383	up	0	0	5	0	0	0	0.0597462	0.0597462	1.67121	0.0597462	0.0597462	0.0597462	Rbm47	Ensembl	chr5	-	66025541	66150955	2397	exon sense-overlapping	ENSMUST00000113725	Rbm47	-	66018601	66150898
ENSMUST00000180495	3.63643	0.529852	2.49016	0.114563	0.830383	up	0	0	5	0	0	0	0.0597462	0.0597462	1.67121	0.0597462	0.0597462	0.0597462	Gm19705	Ensembl	chr1	+	136670768	136688753	496	intergenic
ENSMUST00000163393	3.63643	0.529852	2.49016	0.114563	0.830383	up	0	0	5	0	0	0	0.0597462	0.0597462	1.67121	0.0597462	0.0597462	0.0597462	Irx2	Ensembl	chr13	+	72632084	72633613	927	exon sense-overlapping	ENSMUST00000172353	Irx2	+	72632596	72633772
ENSMUST00000137213	3.63643	0.529852	2.49016	0.114563	0.830383	up	0	0	5	0	0	0	0.0597462	0.0597462	1.67121	0.0597462	0.0597462	0.0597462	Bmp5	Ensembl	chr9	+	75828021	75843600	541	exon sense-overlapping	NM_007555	Bmp5	+	75775364	75899017
ENSMUST00000130532	3.63643	0.529852	2.49016	0.114563	0.830383	up	0	0	5	0	0	0	0.0597462	0.0597462	1.67121	0.0597462	0.0597462	0.0597462	9430024E24Rik	Ensembl	chr2	-	33716360	33718899	713	intergenic
ENSMUST00000165677	3.63643	0.529852	2.49016	0.114563	0.830383	up	0	0	5	0	0	0	0.0597462	0.0597462	1.67121	0.0597462	0.0597462	0.0597462	Gm8624	Ensembl	chr11	-	117420636	117421717	669	intergenic
NR_040507	3.63643	0.529852	2.49016	0.114563	0.830383	up	0	0	5	0	0	0	0.0597462	0.0597462	1.67121	0.0597462	0.0597462	0.0597462	1700003L19Rik	RefSeq	chr16	+	12811389	12848653	746	intergenic
uc007fap.1	3.63643	0.529852	2.49016	0.114563	0.830383	up	0	0	5	0	0	0	0.0597462	0.0597462	1.67121	0.0597462	0.0597462	0.0597462	Gp49a	UCSC_knowngene	chr10	+	51480678	51486219	1629	exon sense-overlapping	uc007faq.1	Gp49a	+	51480678	51486219
TCONS_00020981	3.63643	0.529852	2.49016	0.114563	0.830383	up	0	0	5	0	0	0	0.0597462	0.0597462	1.67121	0.0597462	0.0597462	0.0597462	XLOC_015781	Alexander et al 2013	chr3	-	58803885	58806608	195	intergenic
uc008txx.1	3.63643	0.529852	2.49016	0.114563	0.830383	up	0	0	5	0	0	0	0.0597462	0.0597462	1.67121	0.0597462	0.0597462	0.0597462	mdab1	UCSC_knowngene	chr4	+	104713621	104713811	99	exon sense-overlapping	ENSMUST00000149672	Dab1	+	104605295	104713800
AK082498	3.63643	0.529852	2.49016	0.114563	0.830383	up	0	0	5	0	0	0	0.0597462	0.0597462	1.67121	0.0597462	0.0597462	0.0597462	TUname23657	Genbank	chr3	-	8732869	8736200	3332	intergenic
ENSMUST00000118409	3.63643	0.529852	2.49016	0.114563	0.830383	up	0	0	5	0	0	0	0.0597462	0.0597462	1.67121	0.0597462	0.0597462	0.0597462	Gm14158	Ensembl	chr2	+	152457770	152458078	308	intergenic
TCONS_00029217	3.63643	0.529852	2.49016	0.114563	0.830383	up	0	0	5	0	0	0	0.0597462	0.0597462	1.67121	0.0597462	0.0597462	0.0597462	XLOC_022102	Alexander et al 2013	chr7	+	136272786	136283992	5056	intergenic
ENSMUST00000146580	3.63643	0.529852	2.49016	0.114563	0.830383	up	0	0	5	0	0	0	0.0597462	0.0597462	1.67121	0.0597462	0.0597462	0.0597462	Hsd17b12	Ensembl	chr2	-	94033521	94066764	668	exon sense-overlapping	NM_019657	Hsd17b12	-	94032696	94157909
AK086666	3.63643	0.529852	2.49016	0.114563	0.830383	up	0	0	5	0	0	0	0.0597462	0.0597462	1.67121	0.0597462	0.0597462	0.0597462	TUname12743	Genbank	chr15	-	25528878	25593091	1680	intergenic
AK156228	3.63643	0.529852	2.49016	0.114563	0.830383	up	0	0	5	0	0	0	0.0597462	0.0597462	1.67121	0.0597462	0.0597462	0.0597462	TUname51355	Genbank	chr1	+	193493602	193495886	2292	intergenic
TCONS_00000376	3.63643	0.529852	2.49016	0.114563	0.830383	up	0	0	5	0	0	0	0.0597462	0.0597462	1.67121	0.0597462	0.0597462	0.0597462	XLOC_000842	Alexander et al 2013	chr1	-	34640405	34643289	555	intergenic
AK075954	3.63643	0.529852	2.49016	0.114563	0.830383	up	0	0	5	0	0	0	0.0597462	0.0597462	1.67121	0.0597462	0.0597462	0.0597462	TUname14728	Genbank	chr3	-	135508262	135509908	1648	intronic antisense	NM_027288	Manba	+	135485610	135571403
ENSMUST00000064353	3.63643	0.529852	2.49016	0.114563	0.830383	up	0	0	5	0	0	0	0.0597462	0.0597462	1.67121	0.0597462	0.0597462	0.0597462	Gm8174	Ensembl	chr15	-	10560523	10561524	1001	intergenic
AK015358	3.63643	0.529852	2.49016	0.114563	0.830383	up	0	0	5	0	0	0	0.0597462	0.0597462	1.67121	0.0597462	0.0597462	0.0597462	TUname30164	Genbank	chr8	+	95870813	95872595	1784	natural antisense	NM_010325	Got2	-	95864136	95888365
BU504405	3.63643	0.529852	2.49016	0.114563	0.830383	up	0	0	5	0	0	0	0.0597462	0.0597462	1.67121	0.0597462	0.0597462	0.0597462	TUname63648	Genbank	chr10	-	118803830	118805259	924	intergenic
ENSMUST00000182494	3.63492	0.488387	2.46184	0.116645	0.830383	up	2	2	0	0	0	0	1.15223	1.10044	0.0597462	0.0597462	0.0597462	0.0597462	Bin2	Ensembl	chr15	-	100645442	100651660	306	exon sense-overlapping	ENSMUST00000182574	Bin2	-	100645400	100669525
AK141167	3.63492	0.488387	2.46184	0.116645	0.830383	up	2	2	0	0	0	0	1.15223	1.10044	0.0597462	0.0597462	0.0597462	0.0597462	TUname23964	Genbank	chr12	-	83063391	83098874	1957	natural antisense	uc007odb.1	Rgs6	+	82617498	83158812
ENSMUST00000178609	3.63492	0.488387	2.46184	0.116645	0.830383	up	2	2	0	0	0	0	1.15223	1.10044	0.0597462	0.0597462	0.0597462	0.0597462	Gm12396	Ensembl	chr4	-	40775132	40775725	593	intergenic
ENSMUST00000141935	3.63492	0.488387	2.46184	0.116645	0.830383	up	2	2	0	0	0	0	1.15223	1.10044	0.0597462	0.0597462	0.0597462	0.0597462	Gm13393	Ensembl	chr2	+	29088665	29094501	396	intergenic
ENSMUST00000129911	3.63492	0.488387	2.46184	0.116645	0.830383	up	2	2	0	0	0	0	1.15223	1.10044	0.0597462	0.0597462	0.0597462	0.0597462	Phf19	Ensembl	chr2	-	34898968	34914026	2201	exon sense-overlapping	NM_028716	Phf19	-	34893754	34913976
ENSMUST00000167975	3.63492	0.488387	2.46184	0.116645	0.830383	up	2	2	0	0	0	0	1.15223	1.10044	0.0597462	0.0597462	0.0597462	0.0597462	Slc6a17	Ensembl	chr3	-	107489770	107493196	489	exon sense-overlapping	ENSMUST00000169449	Slc6a17	-	107467542	107518018
ENSMUST00000180969	3.63492	0.488387	2.46184	0.116645	0.830383	up	2	2	0	0	0	0	1.15223	1.10044	0.0597462	0.0597462	0.0597462	0.0597462	Gm26530	Ensembl	chr3	+	116488965	116493358	3941	natural antisense	uc008rce.1	BC051062	-	116492260	116493358
NR_040771	3.63492	0.488387	2.46184	0.116645	0.830383	up	2	2	0	0	0	0	1.15223	1.10044	0.0597462	0.0597462	0.0597462	0.0597462	Gm20756	RefSeq	chr6	+	25931425	25977227	1565	intergenic
AK154991	3.63492	0.488387	2.46184	0.116645	0.830383	up	2	2	0	0	0	0	1.15223	1.10044	0.0597462	0.0597462	0.0597462	0.0597462	TUname34525	Genbank	chr13	-	104832444	104834188	1744	natural antisense	NM_026075	Srek1ip1	+	104817238	104838659
AK044834	3.63035	1.38148	3.67566	0.0552148	0.830383	up	10	6	0	0	0	1	2.79571	2.12037	0.0597462	0.0597462	0.0597462	0.718048	TUname55140	Genbank	chr12	+	100157270	100160423	3154	natural antisense	ENSMUST00000021596	Nrde2	-	100125451	100159653
AK030301	3.6214	2.90639	15.7478	7.24121e-05	0.0528221	up	13	39	16	1	0	4	3.12336	4.49376	2.98156	0.626355	0.0597462	1.78784	TUname14839	Genbank	chr18	+	68581914	68586334	3750	intergenic
AK142586	3.61931	1.42741	3.80314	0.0511589	0.830383	up	4	1	14	0	0	1	1.76674	0.671968	2.81586	0.0597462	0.0597462	0.718048	TUname27167	Genbank	chr16	-	36490581	36492299	1718	intergenic
ENSMUST00000139647	3.61749	0.48604	2.4455	0.117865	0.830383	up	1	3	0	0	0	0	0.707016	1.43038	0.0597462	0.0597462	0.0597462	0.0597462	Prkcz	Ensembl	chr4	-	155290504	155345262	500	exon sense-overlapping	ENSMUST00000123652	Prkcz	-	155290501	155345382
ENSMUST00000121516	3.61749	0.48604	2.4455	0.117865	0.830383	up	1	3	0	0	0	0	0.707016	1.43038	0.0597462	0.0597462	0.0597462	0.0597462	Gm15057	Ensembl	chrX	+	145990741	145991275	534	intergenic
TCONS_00017645	3.61749	0.48604	2.4455	0.117865	0.830383	up	1	3	0	0	0	0	0.707016	1.43038	0.0597462	0.0597462	0.0597462	0.0597462	XLOC_013897	Alexander et al 2013	chr2	-	25549131	25550392	581	intergenic
AK002255	3.61749	0.48604	2.4455	0.117865	0.830383	up	1	3	0	0	0	0	0.707016	1.43038	0.0597462	0.0597462	0.0597462	0.0597462	TUname60914	Genbank	chr7	-	74823614	74853810	1590	intergenic
ENSMUST00000159935	3.61749	0.48604	2.4455	0.117865	0.830383	up	1	3	0	0	0	0	0.707016	1.43038	0.0597462	0.0597462	0.0597462	0.0597462	Ptger1	Ensembl	chr8	+	83666832	83671268	3474	exon sense-overlapping	NM_013641	Ptger1	+	83666639	83670103
uc029vxv.1	3.61749	0.48604	2.4455	0.117865	0.830383	up	1	3	0	0	0	0	0.707016	1.43038	0.0597462	0.0597462	0.0597462	0.0597462	AB349811	UCSC_knowngene	chr6	+	98137039	98137060	21	intergenic
ENSMUST00000135949	3.61749	0.48604	2.4455	0.117865	0.830383	up	1	3	0	0	0	0	0.707016	1.43038	0.0597462	0.0597462	0.0597462	0.0597462	Pgk1	Ensembl	chrX	+	106187162	106203661	1764	exon sense-overlapping	NM_008828	Pgk1	+	106187123	106203699
ENSMUST00000151520	3.61596	1.36466	3.62293	0.0569906	0.830383	up	1	9	7	1	0	0	0.707016	2.58519	2.01501	0.626355	0.0597462	0.0597462	Arhgef15	Ensembl	chr11	-	68946300	68947825	726	exon sense-overlapping	ENSMUST00000065040	Arhgef15	-	68943154	68955074
AK039360_3	3.61432	1.3448	3.55794	0.0592634	0.830383	up	0	14	2	0	1	0	0.0597462	3.13023	0.925468	0.0597462	0.621297	0.0597462
ENSMUST00000145415	3.61011	1.34508	3.55072	0.0595218	0.830383	up	0	14	2	1	0	0	0.0597462	3.13023	0.925468	0.626355	0.0597462	0.0597462	Gm15829	Ensembl	chr16	+	33966238	33967312	869	natural antisense	NM_009471	Umps	-	33955011	33967003
AA683723	3.60805	2.58156	11.7283	0.000615749	0.229931	up	4	30	20	3	1	0	1.76674	4.13514	3.26491	1.34847	0.621297	0.0597462	TUname63163	Genbank	chr4	-	141140158	141355899	434	intron sense-overlapping	ENSMUST00000168138	C630004L07Rik	-	141238184	141239453
uc008exg.1	3.59996	0.483695	2.42917	0.119099	0.830383	up	0	4	0	0	0	0	0.0597462	1.69872	0.0597462	0.0597462	0.0597462	0.0597462	AK084265	UCSC_knowngene	chr18	+	52528660	52577325	549	natural antisense	ENSMUST00000171470	Lox	-	52516068	52529867
ENSMUST00000162704	3.59996	0.483695	2.42917	0.119099	0.830383	up	0	4	0	0	0	0	0.0597462	1.69872	0.0597462	0.0597462	0.0597462	0.0597462	Poc1b	Ensembl	chr10	+	99171283	99197028	669	exon sense-overlapping	NM_027740	Poc1b	+	99107170	99197988
ENSMUST00000142429	3.59996	0.483695	2.42917	0.119099	0.830383	up	0	4	0	0	0	0	0.0597462	1.69872	0.0597462	0.0597462	0.0597462	0.0597462	Gm13056	Ensembl	chr4	+	141278438	141279794	564	intergenic
ENSMUST00000133616	3.59996	0.483695	2.42917	0.119099	0.830383	up	0	4	0	0	0	0	0.0597462	1.69872	0.0597462	0.0597462	0.0597462	0.0597462	2900002K06Rik	Ensembl	chrX	+	8145916	8147676	380	bidirectional	NM_001166409	Rbm3	-	8142355	8145802
ENSMUST00000145127	3.59996	0.483695	2.42917	0.119099	0.830383	up	0	4	0	0	0	0	0.0597462	1.69872	0.0597462	0.0597462	0.0597462	0.0597462	Gm12069	Ensembl	chr11	+	25301262	25322786	806	intergenic
ENSMUST00000176022	3.59996	0.483695	2.42917	0.119099	0.830383	up	0	4	0	0	0	0	0.0597462	1.69872	0.0597462	0.0597462	0.0597462	0.0597462	Usp2	Ensembl	chr9	+	44092673	44093933	417	exon sense-overlapping	ENSMUST00000177054	Usp2	+	44067077	44093929
NR_040342	3.59996	0.483695	2.42917	0.119099	0.830383	up	0	4	0	0	0	0	0.0597462	1.69872	0.0597462	0.0597462	0.0597462	0.0597462	A330093E20Rik	RefSeq	chr18	-	45683486	46045260	2407	natural antisense	ENSMUST00000169783	Kcnn2	+	45560153	45685882
AK139724	3.59996	0.483695	2.42917	0.119099	0.830383	up	0	4	0	0	0	0	0.0597462	1.69872	0.0597462	0.0597462	0.0597462	0.0597462	TUname20556	Genbank	chr9	-	28794295	28954347	1106	intronic antisense	NM_177906	Opcml	+	27791268	28925048
ENSMUST00000151431	3.59996	0.483695	2.42917	0.119099	0.830383	up	0	4	0	0	0	0	0.0597462	1.69872	0.0597462	0.0597462	0.0597462	0.0597462	Wdr92	Ensembl	chr11	+	17182106	17232914	1550	natural antisense	NM_025443	Pno1	-	17203199	17211589
AK080018	3.59996	0.483695	2.42917	0.119099	0.830383	up	0	4	0	0	0	0	0.0597462	1.69872	0.0597462	0.0597462	0.0597462	0.0597462	TUname12856	Genbank	chr15	+	74988749	74989330	583	intergenic
CN704592	3.59996	0.483695	2.42917	0.119099	0.830383	up	0	4	0	0	0	0	0.0597462	1.69872	0.0597462	0.0597462	0.0597462	0.0597462	TUname32158	Genbank	chr15	-	79426258	79455554	653	exon sense-overlapping	ENSMUST00000144790	Csnk1e	-	79426398	79439018
ENSMUST00000123217	3.59996	0.483695	2.42917	0.119099	0.830383	up	0	4	0	0	0	0	0.0597462	1.69872	0.0597462	0.0597462	0.0597462	0.0597462	Gins1	Ensembl	chr2	+	150912818	150927545	602	exon sense-overlapping	NM_001163476	Gins1	+	150909593	150926070
uc008gyu.1	3.59996	0.483695	2.42917	0.119099	0.830383	up	0	4	0	0	0	0	0.0597462	1.69872	0.0597462	0.0597462	0.0597462	0.0597462	BC032181	UCSC_knowngene	chr19	-	21161931	21163611	1680	intergenic
ENSMUST00000066038	3.59996	0.483695	2.42917	0.119099	0.830383	up	0	4	0	0	0	0	0.0597462	1.69872	0.0597462	0.0597462	0.0597462	0.0597462	Gm16568	Ensembl	chr9	+	15330572	15335345	1910	natural antisense	ENSMUST00000161132	5830418K08Rik	-	15316919	15357788
NR_040696	3.59996	0.483695	2.42917	0.119099	0.830383	up	0	4	0	0	0	0	0.0597462	1.69872	0.0597462	0.0597462	0.0597462	0.0597462	4930448I18Rik	RefSeq	chr5	+	50151332	50156092	733	intergenic
AK021346	3.59996	0.483695	2.42917	0.119099	0.830383	up	0	4	0	0	0	0	0.0597462	1.69872	0.0597462	0.0597462	0.0597462	0.0597462	TUname16530	Genbank	chr6	+	17578066	17578827	763	intergenic
AK009208	3.59996	0.483695	2.42917	0.119099	0.830383	up	0	4	0	0	0	0	0.0597462	1.69872	0.0597462	0.0597462	0.0597462	0.0597462	TUname34463	Genbank	chr2	+	164522216	164523757	1546	intergenic
AK042297	3.59996	0.483695	2.42917	0.119099	0.830383	up	0	4	0	0	0	0	0.0597462	1.69872	0.0597462	0.0597462	0.0597462	0.0597462	TUname35462	Genbank	chr13	-	109820818	109822499	1682	intronic antisense	ENSMUST00000079975	Pde4d	+	109581404	109951344
ENSMUST00000131198	3.59996	0.483695	2.42917	0.119099	0.830383	up	0	4	0	0	0	0	0.0597462	1.69872	0.0597462	0.0597462	0.0597462	0.0597462	Gm13620	Ensembl	chr2	+	60125095	60125819	511	natural antisense	ENSMUST00000112550	Baz2b	-	59899362	60125697
ENSMUST00000171864	3.59996	0.483695	2.42917	0.119099	0.830383	up	0	4	0	0	0	0	0.0597462	1.69872	0.0597462	0.0597462	0.0597462	0.0597462	Dok2	Ensembl	chr14	+	70775878	70776869	247	exon sense-overlapping	NM_010071	Dok2	+	70774380	70778494
ENSMUST00000145715	3.59996	0.483695	2.42917	0.119099	0.830383	up	0	4	0	0	0	0	0.0597462	1.69872	0.0597462	0.0597462	0.0597462	0.0597462	Src	Ensembl	chr2	+	157424115	157455707	416	exon sense-overlapping	ENSMUST00000109531	Src	+	157455670	157471838
ENSMUST00000133985	3.59996	0.483695	2.42917	0.119099	0.830383	up	0	4	0	0	0	0	0.0597462	1.69872	0.0597462	0.0597462	0.0597462	0.0597462	Esr1	Ensembl	chr10	+	4611995	4671884	2822	exon sense-overlapping	NM_007956	Esr1	+	4612045	5003761
uc008dqd.1	3.59996	0.483695	2.42917	0.119099	0.830383	up	0	4	0	0	0	0	0.0597462	1.69872	0.0597462	0.0597462	0.0597462	0.0597462	AK006637	UCSC_knowngene	chr17	+	79714584	79716436	1852	natural antisense	NM_009994	Cyp1b1	-	79706952	79715041
ENSMUST00000144522	3.59996	0.483695	2.42917	0.119099	0.830383	up	0	4	0	0	0	0	0.0597462	1.69872	0.0597462	0.0597462	0.0597462	0.0597462	Cacna1f	Ensembl	chrX	+	7607097	7618109	3838	exon sense-overlapping	ENSMUST00000115725	Cacna1f	+	7607128	7635196
ENSMUST00000148343	3.59996	0.483695	2.42917	0.119099	0.830383	up	0	4	0	0	0	0	0.0597462	1.69872	0.0597462	0.0597462	0.0597462	0.0597462	Tyro3	Ensembl	chr2	+	119799326	119803335	470	exon sense-overlapping	uc008lup.1	Tyro3	+	119798849	119818103
AK155274	3.59996	0.483695	2.42917	0.119099	0.830383	up	0	4	0	0	0	0	0.0597462	1.69872	0.0597462	0.0597462	0.0597462	0.0597462	TUname47974	Genbank	chr6	+	53707179	53709628	2455	intergenic
TCONS_00009548	3.59996	0.483695	2.42917	0.119099	0.830383	up	0	4	0	0	0	0	0.0597462	1.69872	0.0597462	0.0597462	0.0597462	0.0597462	XLOC_007275	Alexander et al 2013	chr14	+	61274746	61275988	927	intergenic
ENSMUST00000150366	3.59996	0.483695	2.42917	0.119099	0.830383	up	0	4	0	0	0	0	0.0597462	1.69872	0.0597462	0.0597462	0.0597462	0.0597462	Gm11707	Ensembl	chr11	-	106972057	106973090	490	intergenic
ENSMUST00000154141	3.59996	0.483695	2.42917	0.119099	0.830383	up	0	4	0	0	0	0	0.0597462	1.69872	0.0597462	0.0597462	0.0597462	0.0597462	Flii	Ensembl	chr11	-	60714122	60714721	458	natural antisense	NM_001159405	Llgl1	+	60699689	60714188
ENSMUST00000143421	3.59996	0.483695	2.42917	0.119099	0.830383	up	0	4	0	0	0	0	0.0597462	1.69872	0.0597462	0.0597462	0.0597462	0.0597462	Zwilch	Ensembl	chr9	-	64139982	64147376	368	exon sense-overlapping	ENSMUST00000176794	Zwilch	-	64139903	64172894
ENSMUST00000150855	3.59996	0.483695	2.42917	0.119099	0.830383	up	0	4	0	0	0	0	0.0597462	1.69872	0.0597462	0.0597462	0.0597462	0.0597462	Igsf9	Ensembl	chr1	+	172497779	172498601	590	exon sense-overlapping	NM_001145800	Igsf9	+	172482212	172498877
ENSMUST00000131013	3.59996	0.483695	2.42917	0.119099	0.830383	up	0	4	0	0	0	0	0.0597462	1.69872	0.0597462	0.0597462	0.0597462	0.0597462	Gm12128	Ensembl	chr11	+	37658988	37673166	2914	intergenic
ENSMUST00000141135	3.59996	0.483695	2.42917	0.119099	0.830383	up	0	4	0	0	0	0	0.0597462	1.69872	0.0597462	0.0597462	0.0597462	0.0597462	Abca4	Ensembl	chr3	+	122132002	122180061	3605	exon sense-overlapping	uc008ren.1	Abca4	+	122173114	122180061
ENSMUST00000121349	3.59996	0.483695	2.42917	0.119099	0.830383	up	0	4	0	0	0	0	0.0597462	1.69872	0.0597462	0.0597462	0.0597462	0.0597462	Gm11677	Ensembl	chr11	-	111724647	111725624	977	intergenic
ENSMUST00000151215	3.59996	0.483695	2.42917	0.119099	0.830383	up	0	4	0	0	0	0	0.0597462	1.69872	0.0597462	0.0597462	0.0597462	0.0597462	4933407I08Rik	Ensembl	chr18	+	42935469	42938887	1294	intronic antisense	ENSMUST00000025377	Ppp2r2b	-	42645268	43059471
AW124219	3.59996	0.483695	2.42917	0.119099	0.830383	up	0	4	0	0	0	0	0.0597462	1.69872	0.0597462	0.0597462	0.0597462	0.0597462	TUname63388	Genbank	chr18	-	35876944	35877311	383	intergenic
ENSMUST00000155457	3.59996	0.483695	2.42917	0.119099	0.830383	up	0	4	0	0	0	0	0.0597462	1.69872	0.0597462	0.0597462	0.0597462	0.0597462	Gucy2e	Ensembl	chr11	-	69226634	69237022	3210	exon sense-overlapping	NM_008192	Gucy2e	-	69218116	69237022
ENSMUST00000163297	3.59996	0.483695	2.42917	0.119099	0.830383	up	0	4	0	0	0	0	0.0597462	1.69872	0.0597462	0.0597462	0.0597462	0.0597462	Tmc3	Ensembl	chr7	+	83584926	83618107	3621	exon sense-overlapping	NM_177695	Tmc3	+	83584930	83623709
ENSMUST00000161416	3.59996	0.483695	2.42917	0.119099	0.830383	up	0	4	0	0	0	0	0.0597462	1.69872	0.0597462	0.0597462	0.0597462	0.0597462	Gm16333	Ensembl	chr4	+	152410799	152411262	318	intronic antisense	NM_010598	Kcnab2	-	152390739	152477549
uc029qpi.1	3.59996	0.483695	2.42917	0.119099	0.830383	up	0	4	0	0	0	0	0.0597462	1.69872	0.0597462	0.0597462	0.0597462	0.0597462	AB349811	UCSC_knowngene	chr1	+	75260301	75260322	21	intronic antisense	uc007bor.1	Ptprn	-	75255533	75264208
TCONS_00029186	3.59996	0.483695	2.42917	0.119099	0.830383	up	0	4	0	0	0	0	0.0597462	1.69872	0.0597462	0.0597462	0.0597462	0.0597462	XLOC_022003	Alexander et al 2013	chr7	+	123031267	123068282	2658	exon sense-overlapping	uc009jpa.1	AK140221	+	123031414	123066439
ENSMUST00000156285	3.59996	0.483695	2.42917	0.119099	0.830383	up	0	4	0	0	0	0	0.0597462	1.69872	0.0597462	0.0597462	0.0597462	0.0597462	Gm16312	Ensembl	chr19	-	4000757	4001232	362	natural antisense	NM_025529	Nudt8	+	4000579	4002102
ENSMUST00000147654	3.59996	0.483695	2.42917	0.119099	0.830383	up	0	4	0	0	0	0	0.0597462	1.69872	0.0597462	0.0597462	0.0597462	0.0597462	1700047F07Rik	Ensembl	chr4	+	107707056	107708644	386	intergenic
ENSMUST00000118354	3.59996	0.483695	2.42917	0.119099	0.830383	up	0	4	0	0	0	0	0.0597462	1.69872	0.0597462	0.0597462	0.0597462	0.0597462	Gm15709	Ensembl	chr5	+	144406601	144406814	213	intergenic
ENSMUST00000169454	3.59996	0.483695	2.42917	0.119099	0.830383	up	0	4	0	0	0	0	0.0597462	1.69872	0.0597462	0.0597462	0.0597462	0.0597462	Wdr4	Ensembl	chr17	-	31496125	31501293	1300	exon sense-overlapping	NM_021322	Wdr4	-	31494321	31512487
ENSMUST00000118933	3.59996	0.483695	2.42917	0.119099	0.830383	up	0	4	0	0	0	0	0.0597462	1.69872	0.0597462	0.0597462	0.0597462	0.0597462	Gm15183	Ensembl	chr1	+	75542210	75542558	348	intergenic
uc012fzj.1	3.59996	0.483695	2.42917	0.119099	0.830383	up	0	4	0	0	0	0	0.0597462	1.69872	0.0597462	0.0597462	0.0597462	0.0597462	Cars2	UCSC_knowngene	chr8	-	11526001	11550771	1208	exon sense-overlapping	NM_024248	Cars2	-	11514016	11550771
ENSMUST00000149820	3.59996	0.483695	2.42917	0.119099	0.830383	up	0	4	0	0	0	0	0.0597462	1.69872	0.0597462	0.0597462	0.0597462	0.0597462	Gm13748	Ensembl	chr1	+	64078653	64090782	378	natural antisense	uc007bgq.1	Klf7	-	64041925	64121426
ENSMUST00000122349	3.59996	0.483695	2.42917	0.119099	0.830383	up	0	4	0	0	0	0	0.0597462	1.69872	0.0597462	0.0597462	0.0597462	0.0597462	Gm12738	Ensembl	chr4	-	108450806	108451342	536	intergenic
AK138186	3.59996	0.483695	2.42917	0.119099	0.830383	up	0	4	0	0	0	0	0.0597462	1.69872	0.0597462	0.0597462	0.0597462	0.0597462	TUname31270	Genbank	chr8	+	31105062	31106283	1221	intergenic
NR_045349	3.59996	0.483695	2.42917	0.119099	0.830383	up	0	4	0	0	0	0	0.0597462	1.69872	0.0597462	0.0597462	0.0597462	0.0597462	4930401C15Rik	RefSeq	chr10	-	25779313	25837437	865	intergenic
ENSMUST00000106377	3.59996	0.483695	2.42917	0.119099	0.830383	up	0	4	0	0	0	0	0.0597462	1.69872	0.0597462	0.0597462	0.0597462	0.0597462	Gm11735	Ensembl	chr11	-	116739061	116749833	1581	exon sense-overlapping	uc011yib.1	St6galnac1	-	116738993	116775507
uc008zsa.1	3.59996	0.483695	2.42917	0.119099	0.830383	up	0	4	0	0	0	0	0.0597462	1.69872	0.0597462	0.0597462	0.0597462	0.0597462	AK145395	UCSC_knowngene	chr5	+	127578749	127580102	1021	intergenic
NR_045173	3.59996	0.483695	2.42917	0.119099	0.830383	up	0	4	0	0	0	0	0.0597462	1.69872	0.0597462	0.0597462	0.0597462	0.0597462	Proc	RefSeq	chr18	-	32123125	32138205	1607	exon sense-overlapping	NM_008934	Proc	-	32123125	32138205
ENSMUST00000153857	3.59996	0.483695	2.42917	0.119099	0.830383	up	0	4	0	0	0	0	0.0597462	1.69872	0.0597462	0.0597462	0.0597462	0.0597462	Tbc1d10b	Ensembl	chr7	-	127199056	127199985	564	exon sense-overlapping	NM_144522	Tbc1d10b	-	127197458	127208468
ENSMUST00000181498	3.59996	0.483695	2.42917	0.119099	0.830383	up	0	4	0	0	0	0	0.0597462	1.69872	0.0597462	0.0597462	0.0597462	0.0597462	Gm16861	Ensembl	chr16	-	4935047	4939585	1647	intronic antisense	NM_029657	Mgrn1	+	4886099	4938296
AK017013	3.59996	0.483695	2.42917	0.119099	0.830383	up	0	4	0	0	0	0	0.0597462	1.69872	0.0597462	0.0597462	0.0597462	0.0597462	TUname2617	Genbank	chr6	+	107627773	107632307	1191	intergenic
ENSMUST00000119772	3.59996	0.483695	2.42917	0.119099	0.830383	up	0	4	0	0	0	0	0.0597462	1.69872	0.0597462	0.0597462	0.0597462	0.0597462	Gm13492	Ensembl	chr2	-	51817904	51818569	665	intergenic
ENSMUST00000131195	3.59996	0.483695	2.42917	0.119099	0.830383	up	0	4	0	0	0	0	0.0597462	1.69872	0.0597462	0.0597462	0.0597462	0.0597462	Apbb1ip	Ensembl	chr2	+	22774093	22836145	1356	exon sense-overlapping	NM_019456	Apbb1ip	+	22774326	22875653
ENSMUST00000174880	3.59996	0.483695	2.42917	0.119099	0.830383	up	0	4	0	0	0	0	0.0597462	1.69872	0.0597462	0.0597462	0.0597462	0.0597462	C2	Ensembl	chr17	-	34893349	34895557	407	natural antisense	NM_198886	Zbtb12	+	34894558	34896844
AK015071	3.59996	0.483695	2.42917	0.119099	0.830383	up	0	4	0	0	0	0	0.0597462	1.69872	0.0597462	0.0597462	0.0597462	0.0597462	TUname39908	Genbank	chr1	+	36332707	36333421	716	intergenic
AK047870	3.59996	0.483695	2.42917	0.119099	0.830383	up	0	4	0	0	0	0	0.0597462	1.69872	0.0597462	0.0597462	0.0597462	0.0597462	TUname51918	Genbank	chr6	+	148494440	148496502	2062	intergenic
TCONS_00016019	3.59996	0.483695	2.42917	0.119099	0.830383	up	0	4	0	0	0	0	0.0597462	1.69872	0.0597462	0.0597462	0.0597462	0.0597462	XLOC_011904	Alexander et al 2013	chr19	+	29067339	29069410	735	intergenic
AK028917	3.59996	0.483695	2.42917	0.119099	0.830383	up	0	4	0	0	0	0	0.0597462	1.69872	0.0597462	0.0597462	0.0597462	0.0597462	TUname18051	Genbank	chr18	+	69217500	69222230	3128	intergenic
uc008gqu.1	3.59996	0.483695	2.42917	0.119099	0.830383	up	0	4	0	0	0	0	0.0597462	1.69872	0.0597462	0.0597462	0.0597462	0.0597462	AK218226	UCSC_knowngene	chr19	-	10714474	10714621	147	intergenic
AK040241	3.59996	0.483695	2.42917	0.119099	0.830383	up	0	4	0	0	0	0	0.0597462	1.69872	0.0597462	0.0597462	0.0597462	0.0597462	TUname40918	Genbank	chr1	-	136252670	136255846	2520	intergenic
BU946273	3.59996	0.483695	2.42917	0.119099	0.830383	up	0	4	0	0	0	0	0.0597462	1.69872	0.0597462	0.0597462	0.0597462	0.0597462	TUname63683	Genbank	chr1	-	120086249	120086809	818	intergenic
BG080531	3.59996	0.483695	2.42917	0.119099	0.830383	up	0	4	0	0	0	0	0.0597462	1.69872	0.0597462	0.0597462	0.0597462	0.0597462	TUname63551	Genbank	chr16	-	80791430	80792062	632	intergenic
ENSMUST00000153497	3.59996	0.483695	2.42917	0.119099	0.830383	up	0	4	0	0	0	0	0.0597462	1.69872	0.0597462	0.0597462	0.0597462	0.0597462	2310065F04Rik	Ensembl	chr11	-	67114008	67116841	1049	intergenic
AK005783	3.59996	0.483695	2.42917	0.119099	0.830383	up	0	4	0	0	0	0	0.0597462	1.69872	0.0597462	0.0597462	0.0597462	0.0597462	TUname56200	Genbank	chr2	-	118658819	118660070	1252	intergenic
uc007dfv.1	3.59996	0.483695	2.42917	0.119099	0.830383	up	0	4	0	0	0	0	0.0597462	1.69872	0.0597462	0.0597462	0.0597462	0.0597462	AK135878	UCSC_knowngene	chr1	+	161890447	161900913	576	intergenic
ENSMUST00000160449	3.59996	0.483695	2.42917	0.119099	0.830383	up	0	4	0	0	0	0	0.0597462	1.69872	0.0597462	0.0597462	0.0597462	0.0597462	Pkd1l2	Ensembl	chr8	-	117023549	117028843	1107	exon sense-overlapping	uc012glk.1	Pkd1l2	-	117009569	117056455
ENSMUST00000141027	3.59996	0.483695	2.42917	0.119099	0.830383	up	0	4	0	0	0	0	0.0597462	1.69872	0.0597462	0.0597462	0.0597462	0.0597462	Gm11607	Ensembl	chr1	+	63200312	63207614	462	intronic antisense	ENSMUST00000050536	Gpr1	-	63182690	63214543
AK155799	3.59996	0.483695	2.42917	0.119099	0.830383	up	0	4	0	0	0	0	0.0597462	1.69872	0.0597462	0.0597462	0.0597462	0.0597462	TUname30089	Genbank	chr14	-	72840640	72863555	1026	intergenic
ENSMUST00000121061	3.59996	0.483695	2.42917	0.119099	0.830383	up	0	4	0	0	0	0	0.0597462	1.69872	0.0597462	0.0597462	0.0597462	0.0597462	Gm12021	Ensembl	chr11	-	18508036	18509940	1904	intergenic
ENSMUST00000137812	3.59996	0.483695	2.42917	0.119099	0.830383	up	0	4	0	0	0	0	0.0597462	1.69872	0.0597462	0.0597462	0.0597462	0.0597462	Msrb2	Ensembl	chr2	+	19371439	19383284	249	exon sense-overlapping	NM_029619	Msrb2	+	19371635	19394971
ENSMUST00000139905	3.59996	0.483695	2.42917	0.119099	0.830383	up	0	4	0	0	0	0	0.0597462	1.69872	0.0597462	0.0597462	0.0597462	0.0597462	Mgat5b	Ensembl	chr11	+	116947334	116974307	725	exon sense-overlapping	ENSMUST00000136584	Mgat5b	+	116966795	116978393
ENSMUST00000154118	3.59996	0.483695	2.42917	0.119099	0.830383	up	0	4	0	0	0	0	0.0597462	1.69872	0.0597462	0.0597462	0.0597462	0.0597462	Sh3tc1	Ensembl	chr5	-	35723067	35729012	370	exon sense-overlapping	NM_194344	Sh3tc1	-	35697179	35729276
ENSMUST00000139380	3.59996	0.483695	2.42917	0.119099	0.830383	up	0	4	0	0	0	0	0.0597462	1.69872	0.0597462	0.0597462	0.0597462	0.0597462	Tlr13	Ensembl	chrX	+	106143203	106143622	119	exon sense-overlapping	NM_205820	Tlr13	+	106143274	106160493
uc008gns.1	3.59996	0.483695	2.42917	0.119099	0.830383	up	0	4	0	0	0	0	0.0597462	1.69872	0.0597462	0.0597462	0.0597462	0.0597462	AK011444	UCSC_knowngene	chr19	-	8888388	8889144	474	natural antisense	ENSMUST00000096251	1810009A15Rik	+	8888902	8890740
uc029trj.1	3.59996	0.483695	2.42917	0.119099	0.830383	up	0	4	0	0	0	0	0.0597462	1.69872	0.0597462	0.0597462	0.0597462	0.0597462	AB351889	UCSC_knowngene	chr19	-	11733110	11733138	28	intergenic
AK133669	3.59996	0.483695	2.42917	0.119099	0.830383	up	0	4	0	0	0	0	0.0597462	1.69872	0.0597462	0.0597462	0.0597462	0.0597462	TUname33115	Genbank	chr3	+	36572162	36573057	897	bidirectional	NM_009828	Ccna2	-	36564864	36571996
AK009853	3.59996	0.483695	2.42917	0.119099	0.830383	up	0	4	0	0	0	0	0.0597462	1.69872	0.0597462	0.0597462	0.0597462	0.0597462	TUname34027	Genbank	chr3	-	92532510	92534511	673	intergenic
ENSMUST00000121686	3.59996	0.483695	2.42917	0.119099	0.830383	up	0	4	0	0	0	0	0.0597462	1.69872	0.0597462	0.0597462	0.0597462	0.0597462	Gm14143	Ensembl	chr2	+	150933532	150933889	357	intergenic
ENSMUST00000145158	3.59996	0.483695	2.42917	0.119099	0.830383	up	0	4	0	0	0	0	0.0597462	1.69872	0.0597462	0.0597462	0.0597462	0.0597462	Gm11197	Ensembl	chr11	-	78708737	78709761	839	intergenic
uc007alb.1	3.59996	0.483695	2.42917	0.119099	0.830383	up	0	4	0	0	0	0	0.0597462	1.69872	0.0597462	0.0597462	0.0597462	0.0597462	AK205147	UCSC_knowngene	chr1	+	20803011	20803381	370	natural antisense	NM_008563	Mcm3	-	20803013	20820213
AK139606	3.59996	0.483695	2.42917	0.119099	0.830383	up	0	4	0	0	0	0	0.0597462	1.69872	0.0597462	0.0597462	0.0597462	0.0597462	TUname494	Genbank	chr8	-	116434941	116437372	2433	intergenic
ENSMUST00000169235	3.59996	0.483695	2.42917	0.119099	0.830383	up	0	4	0	0	0	0	0.0597462	1.69872	0.0597462	0.0597462	0.0597462	0.0597462	Gm7502	Ensembl	chr18	+	7932781	7933514	733	intron sense-overlapping	ENSMUST00000169478	Wac	+	7917638	7973547
ENSMUST00000122953	3.59996	0.483695	2.42917	0.119099	0.830383	up	0	4	0	0	0	0	0.0597462	1.69872	0.0597462	0.0597462	0.0597462	0.0597462	Gm14762	Ensembl	chrX	+	85826660	85834831	1430	intron sense-overlapping	uc009trz.2	5430427O19Rik	+	85821944	85891499
ENSMUST00000117521	3.59996	0.483695	2.42917	0.119099	0.830383	up	0	4	0	0	0	0	0.0597462	1.69872	0.0597462	0.0597462	0.0597462	0.0597462	Gm15783	Ensembl	chr6	+	149405821	149406685	633	intergenic
uc007omi.2	3.59996	0.483695	2.42917	0.119099	0.830383	up	0	4	0	0	0	0	0.0597462	1.69872	0.0597462	0.0597462	0.0597462	0.0597462	DQ707326	UCSC_knowngene	chr12	-	98399700	98399799	99	intergenic
ENSMUST00000155754	3.5982	1.37051	3.58719	0.0582289	0.830383	up	4	12	0	0	0	1	1.76674	2.93618	0.0597462	0.0597462	0.0597462	0.718048	Arap1	Ensembl	chr7	+	101394654	101396131	325	exon sense-overlapping	ENSMUST00000084896	Arap1	+	101372992	101411888
uc008smn.2	3.59351	0.481836	2.42176	0.119663	0.830383	up	3	0	1	0	0	0	1.49196	0.0597462	0.556593	0.0597462	0.0597462	0.0597462	DQ724032	UCSC_knowngene	chr4	+	42377661	42377696	35	intergenic
TCONS_00013428	3.59351	0.481836	2.42176	0.119663	0.830383	up	3	0	1	0	0	0	1.49196	0.0597462	0.556593	0.0597462	0.0597462	0.0597462	XLOC_010401	Alexander et al 2013	chr17	+	94759121	94759690	450	intergenic
ENSMUST00000150756	3.59351	0.481836	2.42176	0.119663	0.830383	up	3	0	1	0	0	0	1.49196	0.0597462	0.556593	0.0597462	0.0597462	0.0597462	Tbx15	Ensembl	chr3	+	99296509	99316240	653	exon sense-overlapping	NM_009323	Tbx15	+	99253759	99354260
ENSMUST00000126242	3.59351	0.481836	2.42176	0.119663	0.830383	up	3	0	1	0	0	0	1.49196	0.0597462	0.556593	0.0597462	0.0597462	0.0597462	1700007K13Rik	Ensembl	chr2	-	28462000	28465852	666	exon sense-overlapping	ENSMUST00000127683	1700007K13Rik	-	28462347	28466316
ENSMUST00000144010	3.59351	0.481836	2.42176	0.119663	0.830383	up	3	0	1	0	0	0	1.49196	0.0597462	0.556593	0.0597462	0.0597462	0.0597462	Numbl	Ensembl	chr7	+	27258432	27266801	456	exon sense-overlapping	NM_010950	Numbl	+	27258760	27282150
ENSMUST00000131280	3.59351	0.481836	2.42176	0.119663	0.830383	up	3	0	1	0	0	0	1.49196	0.0597462	0.556593	0.0597462	0.0597462	0.0597462	Ninj1	Ensembl	chr13	+	49187535	49195759	706	exon sense-overlapping	ENSMUST00000120733	Ninj1	+	49187524	49196244
ENSMUST00000133751	3.59351	0.481836	2.42176	0.119663	0.830383	up	3	0	1	0	0	0	1.49196	0.0597462	0.556593	0.0597462	0.0597462	0.0597462	Gm14170	Ensembl	chr2	-	156377924	156378968	331	intergenic
ENSMUST00000182188	3.58637	1.87581	5.96119	0.0146256	0.830383	up	8	7	14	1	1	0	2.52693	2.29249	2.81586	0.626355	0.621297	0.0597462	Gemin2	Ensembl	chr12	+	59013453	59028399	1946	exon sense-overlapping	NM_025656	Gemin2	+	59013392	59027988
ENSMUST00000173235	3.5758	0.479491	2.40537	0.120922	0.830383	up	2	1	1	0	0	0	1.15223	0.671968	0.556593	0.0597462	0.0597462	0.0597462	Gigyf2	Ensembl	chr1	+	87403666	87442020	2826	exon sense-overlapping	ENSMUST00000173173	Gigyf2	+	87327065	87433799
NR_030454_6	3.5758	0.479491	2.40537	0.120922	0.830383	up	2	1	1	0	0	0	1.15223	0.671968	0.556593	0.0597462	0.0597462	0.0597462
TCONS_00023020	3.5758	0.479491	2.40537	0.120922	0.830383	up	2	1	1	0	0	0	1.15223	0.671968	0.556593	0.0597462	0.0597462	0.0597462	TUname25867	Alexander et al 2013	chr4	-	56323431	56325358	75	intergenic
NR_027968	3.55799	0.477148	2.389	0.122195	0.830383	up	1	2	1	0	0	0	0.707016	1.10044	0.556593	0.0597462	0.0597462	0.0597462	1700020N01Rik	RefSeq	chr10	+	21593144	21622375	1061	intergenic
CK383189	3.55799	0.477148	2.389	0.122195	0.830383	up	1	2	1	0	0	0	0.707016	1.10044	0.556593	0.0597462	0.0597462	0.0597462	TUname63995	Genbank	chr3	-	65656271	65656847	591	intergenic
uc007pqo.1	3.55799	0.477148	2.389	0.122195	0.830383	up	1	2	1	0	0	0	0.707016	1.10044	0.556593	0.0597462	0.0597462	0.0597462	DQ686689	UCSC_knowngene	chr13	-	21503829	21503873	44	intergenic
ENSMUST00000135145	3.55799	0.477148	2.389	0.122195	0.830383	up	1	2	1	0	0	0	0.707016	1.10044	0.556593	0.0597462	0.0597462	0.0597462	1700010K10Rik	Ensembl	chr6	-	95114016	95117631	427	bidirectional	ENSMUST00000119582	Kbtbd8	+	95117879	95129718
ENSMUST00000145413	3.55799	0.477148	2.389	0.122195	0.830383	up	1	2	1	0	0	0	0.707016	1.10044	0.556593	0.0597462	0.0597462	0.0597462	Gm14487	Ensembl	chr2	+	30534728	30539022	1259	intergenic
ENSMUST00000141038	3.54007	0.474806	2.37262	0.123482	0.830383	up	0	3	1	0	0	0	0.0597462	1.43038	0.556593	0.0597462	0.0597462	0.0597462	Eltd1	Ensembl	chr3	+	151439097	151500167	783	exon sense-overlapping	NM_133222	Eltd1	+	151437881	151545081
ENSMUST00000152218	3.54007	0.474806	2.37262	0.123482	0.830383	up	0	3	1	0	0	0	0.0597462	1.43038	0.556593	0.0597462	0.0597462	0.0597462	Smyd5	Ensembl	chr6	+	85432001	85440342	704	exon sense-overlapping	NM_144918	Smyd5	+	85431975	85446429
uc009cbo.1	3.54007	0.474806	2.37262	0.123482	0.830383	up	0	3	1	0	0	0	0.0597462	1.43038	0.556593	0.0597462	0.0597462	0.0597462	Kbtbd2	UCSC_knowngene	chr6	-	56789168	56797736	810	exon sense-overlapping	NM_145958	Kbtbd2	-	56777524	56797813
uc029rky.1	3.54007	0.474806	2.37262	0.123482	0.830383	up	0	3	1	0	0	0	0.0597462	1.43038	0.556593	0.0597462	0.0597462	0.0597462	JA187517	UCSC_knowngene	chr11	-	26482380	26482401	21	intron sense-overlapping	ENSMUST00000109504	Vrk2	-	26471321	26591729
uc029rfm.1	3.54007	0.474806	2.37262	0.123482	0.830383	up	0	3	1	0	0	0	0.0597462	1.43038	0.556593	0.0597462	0.0597462	0.0597462	AB350311	UCSC_knowngene	chr10	+	108095970	108096011	41	intergenic
ENSMUST00000155192	3.54007	0.474806	2.37262	0.123482	0.830383	up	0	3	1	0	0	0	0.0597462	1.43038	0.556593	0.0597462	0.0597462	0.0597462	Slc27a5	Ensembl	chr7	-	12993314	12996548	602	exon sense-overlapping	ENSMUST00000120903	Slc27a5	-	12988351	12998192
ENSMUST00000166290	3.54007	0.474806	2.37262	0.123482	0.830383	up	0	3	1	0	0	0	0.0597462	1.43038	0.556593	0.0597462	0.0597462	0.0597462	Has2os	Ensembl	chr15	+	56693551	56778399	1012	natural antisense	NM_008216	Has2	-	56665626	56694546
uc007axl.1	3.54007	0.474806	2.37262	0.123482	0.830383	up	0	3	1	0	0	0	0.0597462	1.43038	0.556593	0.0597462	0.0597462	0.0597462	AK006937	UCSC_knowngene	chr1	-	51457933	51458931	546	intergenic
ENSMUST00000135870	3.54007	0.474806	2.37262	0.123482	0.830383	up	0	3	1	0	0	0	0.0597462	1.43038	0.556593	0.0597462	0.0597462	0.0597462	Traf1	Ensembl	chr2	-	34958151	34961562	319	exon sense-overlapping	NM_009421	Traf1	-	34943257	34961772
ENSMUST00000159740	3.54007	0.474806	2.37262	0.123482	0.830383	up	0	3	1	0	0	0	0.0597462	1.43038	0.556593	0.0597462	0.0597462	0.0597462	Gm16067	Ensembl	chr1	+	180813775	180816859	229	natural antisense	ENSMUST00000162814	H3f3a	-	180803023	180813943
ENSMUST00000123352	3.54007	0.474806	2.37262	0.123482	0.830383	up	0	3	1	0	0	0	0.0597462	1.43038	0.556593	0.0597462	0.0597462	0.0597462	Wdr95	Ensembl	chr5	+	149529732	149564539	695	exon sense-overlapping	NM_029440	Wdr95	+	149528678	149611894
ENSMUST00000159639	3.54007	0.474806	2.37262	0.123482	0.830383	up	0	3	1	0	0	0	0.0597462	1.43038	0.556593	0.0597462	0.0597462	0.0597462	Glis3	Ensembl	chr19	-	28263950	28283906	349	exon sense-overlapping	ENSMUST00000172141	Glis3	-	28262425	28300378
ENSMUST00000135812	3.54007	0.474806	2.37262	0.123482	0.830383	up	0	3	1	0	0	0	0.0597462	1.43038	0.556593	0.0597462	0.0597462	0.0597462	Wdr3	Ensembl	chr3	-	100138734	100141621	398	exon sense-overlapping	NM_175552	Wdr3	-	100138179	100162403
AK007047	3.53822	1.316	3.34516	0.0674052	0.830383	up	6	2	8	0	1	0	2.19633	1.10044	2.16039	0.0597462	0.621297	0.0597462	TUname45056	Genbank	chr8	+	69749692	69750626	935	natural antisense	NM_001200023	Zfp963	-	69741638	69749962
ENSMUST00000127887	3.53214	1.2953	3.27157	0.0704925	0.830383	up	5	7	3	0	1	0	1.99747	2.29249	1.21897	0.0597462	0.621297	0.0597462	Lyrm7	Ensembl	chr11	-	54841091	54850486	335	exon sense-overlapping	NM_029327	Lyrm7	-	54839288	54860591
AK044087	3.52094	1.84036	5.58063	0.0181617	0.830383	up	4	22	0	0	1	1	1.76674	3.71847	0.0597462	0.0597462	0.621297	0.718048	TUname43567	Genbank	chr18	-	59825430	59864721	840	intergenic
ENSMUST00000027895	3.51525	0.470604	2.34862	0.125396	0.830383	up	2	0	2	0	0	0	1.15223	0.0597462	0.925468	0.0597462	0.0597462	0.0597462	Axdnd1	Ensembl	chr1	-	156364925	156399990	2157	exon sense-overlapping	ENSMUST00000180173	Axdnd1	-	156365518	156398542
ENSMUST00000155100	3.51525	0.470604	2.34862	0.125396	0.830383	up	2	0	2	0	0	0	1.15223	0.0597462	0.925468	0.0597462	0.0597462	0.0597462	Cdk11b	Ensembl	chr4	+	155647202	155648405	631	exon sense-overlapping	NM_007661	Cdk11b	+	155624868	155649932
uc029rtu.1	3.51525	0.470604	2.34862	0.125396	0.830383	up	2	0	2	0	0	0	1.15223	0.0597462	0.925468	0.0597462	0.0597462	0.0597462	AB341951	UCSC_knowngene	chr12	+	80337202	80337245	43	natural antisense	NM_177267	Dcaf5	-	80335846	80436601
AK142798	3.51525	0.470604	2.34862	0.125396	0.830383	up	2	0	2	0	0	0	1.15223	0.0597462	0.925468	0.0597462	0.0597462	0.0597462	TUname39558	Genbank	chr1	+	8527779	8531313	3534	intronic antisense	ENSMUST00000115488	Sntg1	-	8363474	8803943
uc029xcq.1	3.51525	0.470604	2.34862	0.125396	0.830383	up	2	0	2	0	0	0	1.15223	0.0597462	0.925468	0.0597462	0.0597462	0.0597462	DQ697668	UCSC_knowngene	chr9	-	67718168	67718219	51	intergenic
ENSMUST00000122321	3.51525	0.470604	2.34862	0.125396	0.830383	up	2	0	2	0	0	0	1.15223	0.0597462	0.925468	0.0597462	0.0597462	0.0597462	Gm11988	Ensembl	chr11	-	8112362	8114094	1069	intergenic
AK132047	3.51525	0.470604	2.34862	0.125396	0.830383	up	2	0	2	0	0	0	1.15223	0.0597462	0.925468	0.0597462	0.0597462	0.0597462	TUname1369	Genbank	chr4	-	82026463	82026650	443	intergenic
AK131714	3.50308	2.2324	8.07656	0.00448486	0.702011	up	4	14	23	1	1	1	1.76674	3.13023	3.44599	0.626355	0.621297	0.718048	TUname1397	Genbank	chr18	+	73815838	73819180	620	bidirectional	NM_145494	Me2	-	73770039	73815392
ENSMUST00000154108	3.49705	0.468264	2.33223	0.126723	0.830383	up	1	1	2	0	0	0	0.707016	0.671968	0.925468	0.0597462	0.0597462	0.0597462	Foxp4	Ensembl	chr17	-	47878479	47878953	365	exon sense-overlapping	NM_028767	Foxp4	-	47867132	47924632
uc029xcc.1	3.49705	0.468264	2.33223	0.126723	0.830383	up	1	1	2	0	0	0	0.707016	0.671968	0.925468	0.0597462	0.0597462	0.0597462	DQ702501	UCSC_knowngene	chr9	-	67709213	67709242	29	intergenic
ENSMUST00000162029	3.49705	0.468264	2.33223	0.126723	0.830383	up	1	1	2	0	0	0	0.707016	0.671968	0.925468	0.0597462	0.0597462	0.0597462	Kif6	Ensembl	chr17	+	49615138	49675385	686	exon sense-overlapping	NM_177052	Kif6	+	49615171	49909847
NR_045657	3.49705	0.468264	2.33223	0.126723	0.830383	up	1	1	2	0	0	0	0.707016	0.671968	0.925468	0.0597462	0.0597462	0.0597462	4933432I03Rik	RefSeq	chr14	-	102987411	103033803	1061	intergenic
DV039594	3.49531	1.81637	5.3967	0.0201764	0.830383	up	16	8	1	0	1	1	3.39019	2.44625	0.556593	0.0597462	0.621297	0.718048	TUname64107	Genbank	chr18	-	62146198	62146900	1019	intergenic
AK035940	3.47876	0.465926	2.31585	0.128064	0.830383	up	0	2	2	0	0	0	0.0597462	1.10044	0.925468	0.0597462	0.0597462	0.0597462	TUname18019	Genbank	chr10	+	96735351	96884708	3681	intergenic
ENSMUST00000164264	3.47876	0.465926	2.31585	0.128064	0.830383	up	0	2	2	0	0	0	0.0597462	1.10044	0.925468	0.0597462	0.0597462	0.0597462	Inpp4b	Ensembl	chr8	+	81844356	81952200	585	exon sense-overlapping	NM_001024617	Inpp4b	+	81715199	82122561
ENSMUST00000143846	3.47876	0.465926	2.31585	0.128064	0.830383	up	0	2	2	0	0	0	0.0597462	1.10044	0.925468	0.0597462	0.0597462	0.0597462	Gpt2	Ensembl	chr8	+	85519408	85525680	628	exon sense-overlapping	NM_173866	Gpt2	+	85492616	85527558
ENSMUST00000166047	3.47876	0.465926	2.31585	0.128064	0.830383	up	0	2	2	0	0	0	0.0597462	1.10044	0.925468	0.0597462	0.0597462	0.0597462	Gm17122	Ensembl	chr5	+	113842600	113843116	372	natural antisense	NM_011779	Coro1c	-	113842438	113908706
ENSMUST00000181227	3.47876	0.465926	2.31585	0.128064	0.830383	up	0	2	2	0	0	0	0.0597462	1.10044	0.925468	0.0597462	0.0597462	0.0597462	Gm26716	Ensembl	chr4	-	130824393	130826313	415	natural antisense	NM_011520	Sdc3	+	130792536	130826318
ENSMUST00000137943	3.47876	0.465926	2.31585	0.128064	0.830383	up	0	2	2	0	0	0	0.0597462	1.10044	0.925468	0.0597462	0.0597462	0.0597462	Lyn	Ensembl	chr4	+	3756456	3813122	685	exon sense-overlapping	NM_001111096	Lyn	+	3678120	3791612
ENSMUST00000116649	3.47876	0.465926	2.31585	0.128064	0.830383	up	0	2	2	0	0	0	0.0597462	1.10044	0.925468	0.0597462	0.0597462	0.0597462	Gm12419	Ensembl	chr4	-	84923553	84924189	636	intronic antisense	ENSMUST00000047023	Cntln	+	84884308	85131921
AK157443	3.47876	0.465926	2.31585	0.128064	0.830383	up	0	2	2	0	0	0	0.0597462	1.10044	0.925468	0.0597462	0.0597462	0.0597462	TUname28462	Genbank	chr2	+	122595713	122600250	4552	natural antisense	NM_025961	Gatm	-	122594472	122611277
uc009dzo.1	3.47876	0.465926	2.31585	0.128064	0.830383	up	0	2	2	0	0	0	0.0597462	1.10044	0.925468	0.0597462	0.0597462	0.0597462	DQ566510	UCSC_knowngene	chr6	+	127803408	127803441	33	intergenic
ENSMUST00000125453	3.47876	0.465926	2.31585	0.128064	0.830383	up	0	2	2	0	0	0	0.0597462	1.10044	0.925468	0.0597462	0.0597462	0.0597462	Sfpq	Ensembl	chr4	+	127026444	127027549	644	exon sense-overlapping	NM_023603	Sfpq	+	127021300	127031236
AK017917	3.47876	0.465926	2.31585	0.128064	0.830383	up	0	2	2	0	0	0	0.0597462	1.10044	0.925468	0.0597462	0.0597462	0.0597462	TUname18226	Genbank	chr14	-	53032416	53039466	1384	natural antisense	ENSMUST00000179512	Trav13d-3	+	53032901	53033418
AK006912	3.47876	0.465926	2.31585	0.128064	0.830383	up	0	2	2	0	0	0	0.0597462	1.10044	0.925468	0.0597462	0.0597462	0.0597462	TUname4116	Genbank	chr2	-	172468445	172468929	484	natural antisense	NM_025542	Rtfdc1	+	172440577	172469899
AK049912	3.46923	1.28445	3.11821	0.0774243	0.830383	up	14	0	0	0	0	1	3.21789	0.0597462	0.0597462	0.0597462	0.0597462	0.718048	TUname1028	Genbank	chr16	+	60624551	60627105	2552	intergenic
AK157250	3.46701	1.83279	5.40495	0.0200813	0.830383	up	4	9	15	0	1	1	1.76674	2.58519	2.90109	0.0597462	0.621297	0.718048	TUname1657	Genbank	chr11	-	20461258	20464664	3381	intergenic
ENSMUST00000149712	3.46555	1.31036	3.21634	0.0729089	0.830383	up	0	2	15	0	1	0	0.0597462	1.10044	2.90109	0.0597462	0.621297	0.0597462	Ankef1	Ensembl	chr2	+	136501990	136551433	3167	exon sense-overlapping	ENSMUST00000123214	Ankef1	+	136515518	136550131
uc009gla.1	3.46525	1.27462	3.10833	0.077895	0.830383	up	1	9	5	1	0	0	0.707016	2.58519	1.67121	0.626355	0.0597462	0.0597462	AK049985	UCSC_knowngene	chr7	-	39446108	39449221	2315	bidirectional	ENSMUST00000061201	Zfp939	+	39449517	39474335
AK014830	3.46326	1.80648	5.29646	0.0213705	0.830383	up	0	10	18	0	2	0	0.0597462	2.71192	3.13018	0.0597462	1.02449	0.0597462	TUname57581	Genbank	chr2	-	91262316	91265263	2949	natural antisense	NM_028733	Pacsin3	+	91257328	91264679
ENSMUST00000158855	3.46318	1.25256	3.05811	0.0803376	0.830383	up	0	14	0	0	1	0	0.0597462	3.13023	0.0597462	0.0597462	0.621297	0.0597462	Gm24739	Ensembl	chr2	-	126269071	126269363	292	intergenic
ENSMUST00000155977	3.46269	1.32119	3.21824	0.0728244	0.830383	up	6	2	8	0	0	1	2.19633	1.10044	2.16039	0.0597462	0.0597462	0.718048	Dhtkd1	Ensembl	chr2	-	5903591	5911836	663	exon sense-overlapping	NM_001081131	Dhtkd1	-	5898059	5942792
ENSMUST00000154220	3.45916	1.27276	3.09519	0.0785265	0.830383	up	0	10	5	1	0	0	0.0597462	2.71192	1.67121	0.626355	0.0597462	0.0597462	Pik3r5	Ensembl	chr11	+	68432124	68476764	815	exon sense-overlapping	NM_177320	Pik3r5	+	68432124	68497846
ENSMUST00000139610	3.44651	1.31684	3.1807	0.0745154	0.830383	up	0	9	7	0	0	1	0.0597462	2.58519	2.01501	0.0597462	0.0597462	0.718048	Pdcd2	Ensembl	chr17	-	15522702	15527084	670	exon sense-overlapping	ENSMUST00000154293	Pdcd2	-	15519207	15527281
ENSMUST00000130361	3.44651	1.31684	3.1807	0.0745154	0.830383	up	0	9	7	0	0	1	0.0597462	2.58519	2.01501	0.0597462	0.0597462	0.718048	2410018L13Rik	Ensembl	chr12	-	22982385	23009998	628	intergenic
ENSMUST00000184161	3.44002	1.24326	3.00365	0.0830794	0.830383	up	6	5	3	0	1	0	2.19633	1.9249	1.21897	0.0597462	0.621297	0.0597462	RP23-279M5.1	Ensembl	chr8	+	86885687	86886566	879	bidirectional	NM_030563	N4bp1	-	86841138	86885258
NR_045687	3.43745	1.29498	3.10209	0.0781944	0.830383	up	2	10	3	0	0	1	1.15223	2.71192	1.21897	0.0597462	0.0597462	0.718048	Gm9895	RefSeq	chr19	+	29067300	29069503	664	intergenic
ENSMUST00000133565	3.4347	0.45939	2.2753	0.131452	0.830383	up	1	0	3	0	0	0	0.707016	0.0597462	1.21897	0.0597462	0.0597462	0.0597462	Tsc1	Ensembl	chr2	+	28641240	28688548	5103	exon sense-overlapping	ENSMUST00000113867	Tsc1	+	28641242	28691167
uc008avz.1	3.4347	0.45939	2.2753	0.131452	0.830383	up	1	0	3	0	0	0	0.707016	0.0597462	1.21897	0.0597462	0.0597462	0.0597462	E4f1	UCSC_knowngene	chr17	-	24443778	24455311	2551	exon sense-overlapping	uc012amj.1	E4f1	-	24443778	24455311
uc008rvl.1	3.4347	0.45939	2.2753	0.131452	0.830383	up	1	0	3	0	0	0	0.707016	0.0597462	1.21897	0.0597462	0.0597462	0.0597462	Ankrd13c	UCSC_knowngene	chr3	+	157947465	158006837	2608	exon sense-overlapping	ENSMUST00000164582	Ankrd13c	+	157947413	158005910
ENSMUST00000177135	3.4347	0.45939	2.2753	0.131452	0.830383	up	1	0	3	0	0	0	0.707016	0.0597462	1.21897	0.0597462	0.0597462	0.0597462	Apol7a	Ensembl	chr15	-	77393332	77396934	817	exon sense-overlapping	ENSMUST00000010745	Apol7a	-	77388956	77396458
ENSMUST00000181365	3.4347	0.45939	2.2753	0.131452	0.830383	up	1	0	3	0	0	0	0.707016	0.0597462	1.21897	0.0597462	0.0597462	0.0597462	Gm26644	Ensembl	chr19	-	44692366	44695275	958	intergenic
ENSMUST00000153829	3.4347	0.45939	2.2753	0.131452	0.830383	up	1	0	3	0	0	0	0.707016	0.0597462	1.21897	0.0597462	0.0597462	0.0597462	Sncb	Ensembl	chr13	-	54759427	54763067	469	exon sense-overlapping	NM_033610	Sncb	-	54758859	54766440
NR_033512	3.4347	0.45939	2.2753	0.131452	0.830383	up	1	0	3	0	0	0	0.707016	0.0597462	1.21897	0.0597462	0.0597462	0.0597462	Gm6194	RefSeq	chr3	-	8461386	8463098	1712	intergenic
ENSMUST00000155590	3.4257	1.26999	3.01613	0.0824426	0.830383	up	10	3	1	0	0	1	2.79571	1.43038	0.556593	0.0597462	0.0597462	0.718048	Gpr133	Ensembl	chr5	+	129096756	129100503	3665	exon sense-overlapping	ENSMUST00000156437	Gpr133	+	129096756	129115095
ENSMUST00000167909	3.41808	1.26689	2.99815	0.083362	0.830383	up	12	0	2	0	0	1	3.02219	0.0597462	0.925468	0.0597462	0.0597462	0.718048	Slc15a2	Ensembl	chr16	-	36761198	36762580	729	exon sense-overlapping	NM_021301	Slc15a2	-	36750163	36784962
ENSMUST00000138306	3.41604	0.457055	2.25894	0.132847	0.830383	up	0	1	3	0	0	0	0.0597462	0.671968	1.21897	0.0597462	0.0597462	0.0597462	Irak4	Ensembl	chr15	+	94543652	94556953	1159	exon sense-overlapping	ENSMUST00000109248	Irak4	+	94543671	94581815
ENSMUST00000146707	3.41604	0.457055	2.25894	0.132847	0.830383	up	0	1	3	0	0	0	0.0597462	0.671968	1.21897	0.0597462	0.0597462	0.0597462	Pik3r2	Ensembl	chr8	-	70768639	70769664	746	exon sense-overlapping	ENSMUST00000143785	Pik3r2	-	70768460	70769388
2_00014184	3.41604	0.457055	2.25894	0.132847	0.830383	up	0	1	3	0	0	0	0.0597462	0.671968	1.21897	0.0597462	0.0597462	0.0597462	Acaa2	Lei Sun et al 2012	chr18	+	74805355	74806212	406	exon sense-overlapping	NM_177470	Acaa2	+	74779211	74806207
ENSMUST00000164501	3.41604	0.457055	2.25894	0.132847	0.830383	up	0	1	3	0	0	0	0.0597462	0.671968	1.21897	0.0597462	0.0597462	0.0597462	Gm17214	Ensembl	chr3	-	69320044	69320585	541	intronic antisense	NM_178726	Ppm1l	+	69316917	69555396
ENSMUST00000126048	3.41604	0.457055	2.25894	0.132847	0.830383	up	0	1	3	0	0	0	0.0597462	0.671968	1.21897	0.0597462	0.0597462	0.0597462	Cep128	Ensembl	chr12	-	90999339	91063411	775	exon sense-overlapping	NM_181815	Cep128	-	90998491	91384409
ENSMUST00000130121	3.4051	1.21035	2.88192	0.0895817	0.830383	up	7	6	0	0	1	0	2.37108	2.12037	0.0597462	0.0597462	0.621297	0.0597462	Ptges2	Ensembl	chr2	+	32397470	32401576	765	exon sense-overlapping	NM_133783	Ptges2	+	32395889	32402740
ENSMUST00000117935	3.40413	1.75993	4.93201	0.0263654	0.830383	up	4	8	14	1	1	0	1.76674	2.44625	2.81586	0.626355	0.621297	0.0597462	Gm11858	Ensembl	chr4	-	15740929	15741767	838	intergenic
ENSMUST00000145523	3.39903	1.22946	2.91482	0.0877717	0.830383	up	6	3	5	0	1	0	2.19633	1.43038	1.67121	0.0597462	0.621297	0.0597462	Epha2	Ensembl	chr4	+	141308893	141310958	531	exon sense-overlapping	NM_010139	Epha2	+	141301220	141329384
NR_046045	3.39488	1.76754	4.94394	0.0261841	0.830383	up	2	6	19	2	0	0	1.15223	2.12037	3.19911	1.03213	0.0597462	0.0597462	1700085C21Rik	RefSeq	chr12	-	82932519	82939155	1082	intronic antisense	uc007odb.1	Rgs6	+	82617498	83158812
AK081906	3.39471	1.27912	2.9919	0.0836843	0.830383	up	8	0	7	0	0	1	2.52693	0.0597462	2.01501	0.0597462	0.0597462	0.718048	TUname8581	Genbank	chr19	-	47727559	47730322	2763	intergenic
AK035023	3.38972	1.22908	2.89979	0.0885934	0.830383	up	2	8	4	1	0	0	1.15223	2.44625	1.46274	0.626355	0.0597462	0.0597462	TUname33877	Genbank	chr1	+	134832155	134846415	2845	natural antisense	ENSMUST00000045665	Ppp1r12b	-	134754657	134955940
ENSMUST00000156790	3.37357	1.7135	4.65396	0.0309839	0.830383	up	13	6	4	2	0	0	3.12336	2.12037	1.46274	1.03213	0.0597462	0.0597462	9630013D21Rik	Ensembl	chr4	-	109651528	109657827	3096	intergenic
ENSMUST00000123607	3.37154	1.27284	2.94353	0.0862248	0.830383	up	1	8	6	0	0	1	0.707016	2.44625	1.85333	0.0597462	0.0597462	0.718048	Mtfp1	Ensembl	chr11	-	4094433	4095140	410	exon sense-overlapping	NM_026443	Mtfp1	-	4091480	4095431
ENSMUST00000105597	3.36623	1.23928	2.88956	0.0891577	0.830383	up	4	0	11	0	1	0	1.76674	0.0597462	2.52504	0.0597462	0.621297	0.0597462	Oprm1	Ensembl	chr10	+	6758592	6849858	1133	exon sense-overlapping	ENSMUST00000052751	Oprm1	+	6788808	7037201
ENSMUST00000150733	3.35194	0.448193	2.20215	0.137821	0.830383	up	0	0	4	0	0	0	0.0597462	0.0597462	1.46274	0.0597462	0.0597462	0.0597462	Tbc1d14	Ensembl	chr5	-	36571180	36586224	1113	exon sense-overlapping	NM_001113362	Tbc1d14	-	36490603	36586226
ENSMUST00000131632	3.35194	0.448193	2.20215	0.137821	0.830383	up	0	0	4	0	0	0	0.0597462	0.0597462	1.46274	0.0597462	0.0597462	0.0597462	Myo7a	Ensembl	chr7	-	98108731	98119492	498	exon sense-overlapping	NM_001256081	Myo7a	-	98051053	98119493
ENSMUST00000128669	3.35194	0.448193	2.20215	0.137821	0.830383	up	0	0	4	0	0	0	0.0597462	0.0597462	1.46274	0.0597462	0.0597462	0.0597462	Col4a5	Ensembl	chrX	+	141658349	141675732	728	exon sense-overlapping	ENSMUST00000112930	Col4a5	+	141475409	141689180
AK089541	3.35194	0.448193	2.20215	0.137821	0.830383	up	0	0	4	0	0	0	0.0597462	0.0597462	1.46274	0.0597462	0.0597462	0.0597462	TUname40380	Genbank	chr13	+	113614212	113614930	719	natural antisense	uc007rxh.1	Snx18	-	113614544	113618558
ENSMUST00000136779	3.35194	0.448193	2.20215	0.137821	0.830383	up	0	0	4	0	0	0	0.0597462	0.0597462	1.46274	0.0597462	0.0597462	0.0597462	Gm15261	Ensembl	chrX	-	169037673	169106536	2763	intronic antisense	ENSMUST00000112129	Arhgap6	+	169036610	169258987
ENSMUST00000153782	3.35194	0.448193	2.20215	0.137821	0.830383	up	0	0	4	0	0	0	0.0597462	0.0597462	1.46274	0.0597462	0.0597462	0.0597462	Slc25a25	Ensembl	chr2	-	32416208	32416571	277	exon sense-overlapping	NM_146118	Slc25a25	-	32414486	32451470
uc008hdm.1	3.35194	0.448193	2.20215	0.137821	0.830383	up	0	0	4	0	0	0	0.0597462	0.0597462	1.46274	0.0597462	0.0597462	0.0597462	A930007I19Rik	UCSC_knowngene	chr19	-	29464749	29523159	1003	natural antisense	uc008hdl.2	Pdcd1lg2	+	29422058	29472927
AK131777	3.35194	0.448193	2.20215	0.137821	0.830383	up	0	0	4	0	0	0	0.0597462	0.0597462	1.46274	0.0597462	0.0597462	0.0597462	TUname39096	Genbank	chr5	+	127616991	127617765	775	natural antisense	uc012edt.1	Slc15a4	-	127604537	127617392
NR_040739	3.35194	0.448193	2.20215	0.137821	0.830383	up	0	0	4	0	0	0	0.0597462	0.0597462	1.46274	0.0597462	0.0597462	0.0597462	4930554C24Rik	RefSeq	chr9	+	84774397	84784351	1084	intergenic
ENSMUST00000160863	3.35194	0.448193	2.20215	0.137821	0.830383	up	0	0	4	0	0	0	0.0597462	0.0597462	1.46274	0.0597462	0.0597462	0.0597462	Phc1	Ensembl	chr6	-	122332671	122335145	410	exon sense-overlapping	ENSMUST00000160843	Phc1	-	122325946	122340506
AK007203	3.35194	0.448193	2.20215	0.137821	0.830383	up	0	0	4	0	0	0	0.0597462	0.0597462	1.46274	0.0597462	0.0597462	0.0597462	TUname50258	Genbank	chr12	-	9029433	9030455	1022	natural antisense	NM_029321	Ttc32	+	9029996	9036394
AK156975	3.35194	0.448193	2.20215	0.137821	0.830383	up	0	0	4	0	0	0	0.0597462	0.0597462	1.46274	0.0597462	0.0597462	0.0597462	TUname41778	Genbank	chr6	-	113676731	113679219	2490	natural antisense	ENSMUST00000089023	Irak2	+	113638487	113693798
ENSMUST00000144890	3.35194	0.448193	2.20215	0.137821	0.830383	up	0	0	4	0	0	0	0.0597462	0.0597462	1.46274	0.0597462	0.0597462	0.0597462	Ddx49	Ensembl	chr8	-	70292876	70302452	2163	natural antisense	ENSMUST00000003669	Homer3	+	70285245	70294353
ENSMUST00000138135	3.35194	0.448193	2.20215	0.137821	0.830383	up	0	0	4	0	0	0	0.0597462	0.0597462	1.46274	0.0597462	0.0597462	0.0597462	Prlr	Ensembl	chr15	+	10213464	10319278	688	exon sense-overlapping	ENSMUST00000130720	Prlr	+	10215954	10319344
AK157620	3.35194	0.448193	2.20215	0.137821	0.830383	up	0	0	4	0	0	0	0.0597462	0.0597462	1.46274	0.0597462	0.0597462	0.0597462	TUname1712	Genbank	chr9	-	21013487	21015873	2390	bidirectional	NM_010493	Icam1	+	21015959	21028796
AK015775	3.35194	0.448193	2.20215	0.137821	0.830383	up	0	0	4	0	0	0	0.0597462	0.0597462	1.46274	0.0597462	0.0597462	0.0597462	TUname60573	Genbank	chr10	+	80647632	80648298	666	natural antisense	ENSMUST00000131876	Btbd2	-	80644637	80656138
ENSMUST00000138746	3.35194	0.448193	2.20215	0.137821	0.830383	up	0	0	4	0	0	0	0.0597462	0.0597462	1.46274	0.0597462	0.0597462	0.0597462	Pold1	Ensembl	chr7	-	44532750	44548849	3496	exon sense-overlapping	NM_011131	Pold1	-	44532743	44548815
ENSMUST00000149508	3.35194	0.448193	2.20215	0.137821	0.830383	up	0	0	4	0	0	0	0.0597462	0.0597462	1.46274	0.0597462	0.0597462	0.0597462	Zfp592	Ensembl	chr7	+	81037738	81038300	463	exon sense-overlapping	NM_178707	Zfp592	+	80993683	81045162
ENSMUST00000152385	3.35194	0.448193	2.20215	0.137821	0.830383	up	0	0	4	0	0	0	0.0597462	0.0597462	1.46274	0.0597462	0.0597462	0.0597462	Frmd4b	Ensembl	chr6	-	97323657	97396736	768	exon sense-overlapping	ENSMUST00000032146	Frmd4b	-	97288359	97487805
AK017761	3.35194	0.448193	2.20215	0.137821	0.830383	up	0	0	4	0	0	0	0.0597462	0.0597462	1.46274	0.0597462	0.0597462	0.0597462	TUname13884	Genbank	chr12	+	12997181	12998033	852	intergenic
ENSMUST00000173949	3.35194	0.448193	2.20215	0.137821	0.830383	up	0	0	4	0	0	0	0.0597462	0.0597462	1.46274	0.0597462	0.0597462	0.0597462	Jmjd1c	Ensembl	chr10	+	67185752	67191750	2574	exon sense-overlapping	ENSMUST00000174408	Jmjd1c	+	67127257	67256318
ENSMUST00000125903	3.35194	0.448193	2.20215	0.137821	0.830383	up	0	0	4	0	0	0	0.0597462	0.0597462	1.46274	0.0597462	0.0597462	0.0597462	Gm16193	Ensembl	chr8	+	41053109	41064706	778	intronic antisense	ENSMUST00000118835	Mtus1	-	40990917	41114667
AK156710	3.35194	0.448193	2.20215	0.137821	0.830383	up	0	0	4	0	0	0	0.0597462	0.0597462	1.46274	0.0597462	0.0597462	0.0597462	TUname55097	Genbank	chr13	-	38386641	38387743	1108	intronic antisense	NM_007556	Bmp6	+	38345715	38499728
ENSMUST00000142484	3.35194	0.448193	2.20215	0.137821	0.830383	up	0	0	4	0	0	0	0.0597462	0.0597462	1.46274	0.0597462	0.0597462	0.0597462	Timeless	Ensembl	chr10	+	128247284	128248046	644	exon sense-overlapping	NM_001136082	Timeless	+	128232062	128252941
ENSMUST00000129522	3.35194	0.448193	2.20215	0.137821	0.830383	up	0	0	4	0	0	0	0.0597462	0.0597462	1.46274	0.0597462	0.0597462	0.0597462	Zfp523	Ensembl	chr17	+	28202465	28205886	1198	exon sense-overlapping	ENSMUST00000133868	Zfp523	+	28197784	28202478
ENSMUST00000152614	3.35194	0.448193	2.20215	0.137821	0.830383	up	0	0	4	0	0	0	0.0597462	0.0597462	1.46274	0.0597462	0.0597462	0.0597462	Pax8	Ensembl	chr2	-	24471884	24475574	3386	exon sense-overlapping	ENSMUST00000136228	Pax8	-	24429526	24475574
ENSMUST00000130402	3.35194	0.448193	2.20215	0.137821	0.830383	up	0	0	4	0	0	0	0.0597462	0.0597462	1.46274	0.0597462	0.0597462	0.0597462	Tspan4	Ensembl	chr7	+	141491488	141492960	577	exon sense-overlapping	NM_001252588	Tspan4	+	141476379	141493427
ENSMUST00000120116	3.35194	0.448193	2.20215	0.137821	0.830383	up	0	0	4	0	0	0	0.0597462	0.0597462	1.46274	0.0597462	0.0597462	0.0597462	Gm12515	Ensembl	chr4	+	55116562	55116923	361	intergenic
ENSMUST00000129805	3.35194	0.448193	2.20215	0.137821	0.830383	up	0	0	4	0	0	0	0.0597462	0.0597462	1.46274	0.0597462	0.0597462	0.0597462	Cth	Ensembl	chr3	-	157894422	157897712	675	exon sense-overlapping	NM_145953	Cth	-	157894247	157925063
ENSMUST00000159044	3.35194	0.448193	2.20215	0.137821	0.830383	up	0	0	4	0	0	0	0.0597462	0.0597462	1.46274	0.0597462	0.0597462	0.0597462	Greb1	Ensembl	chr12	-	16706138	16708454	805	exon sense-overlapping	ENSMUST00000160347	Greb1	-	16706149	16708594
ENSMUST00000126326	3.35194	0.448193	2.20215	0.137821	0.830383	up	0	0	4	0	0	0	0.0597462	0.0597462	1.46274	0.0597462	0.0597462	0.0597462	Gm13837	Ensembl	chr5	+	116257660	116258644	337	intronic antisense	ENSMUST00000086483	Ccdc60	-	116169224	116288963
ENSMUST00000177265	3.35194	0.448193	2.20215	0.137821	0.830383	up	0	0	4	0	0	0	0.0597462	0.0597462	1.46274	0.0597462	0.0597462	0.0597462	Gm5777	Ensembl	chr10	+	57782353	57782801	448	intergenic
ENSMUST00000121682	3.35194	0.448193	2.20215	0.137821	0.830383	up	0	0	4	0	0	0	0.0597462	0.0597462	1.46274	0.0597462	0.0597462	0.0597462	Gm15488	Ensembl	chr13	-	111721478	111724334	670	intergenic
uc007ftd.2	3.35194	0.448193	2.20215	0.137821	0.830383	up	0	0	4	0	0	0	0.0597462	0.0597462	1.46274	0.0597462	0.0597462	0.0597462	DQ690118	UCSC_knowngene	chr10	+	75859401	75859438	37	natural antisense	NM_010798	Mif	-	75859352	75860250
ENSMUST00000125433	3.35194	0.448193	2.20215	0.137821	0.830383	up	0	0	4	0	0	0	0.0597462	0.0597462	1.46274	0.0597462	0.0597462	0.0597462	Phldb2	Ensembl	chr16	-	45825973	45844343	343	exon sense-overlapping	NM_153412	Phldb2	-	45746230	45844378
ENSMUST00000148072	3.35194	0.448193	2.20215	0.137821	0.830383	up	0	0	4	0	0	0	0.0597462	0.0597462	1.46274	0.0597462	0.0597462	0.0597462	Pdss1	Ensembl	chr2	+	22895521	22912699	741	exon sense-overlapping	ENSMUST00000152170	Pdss1	+	22895594	22916213
ENSMUST00000162214	3.35194	0.448193	2.20215	0.137821	0.830383	up	0	0	4	0	0	0	0.0597462	0.0597462	1.46274	0.0597462	0.0597462	0.0597462	Dao	Ensembl	chr5	+	114017091	114020004	801	exon sense-overlapping	ENSMUST00000161610	Dao	+	114004807	114025449
ENSMUST00000181637	3.35194	0.448193	2.20215	0.137821	0.830383	up	0	0	4	0	0	0	0.0597462	0.0597462	1.46274	0.0597462	0.0597462	0.0597462	Gm26600	Ensembl	chr7	+	19770610	19775403	1256	natural antisense	ENSMUST00000155244	Bcam	-	19765612	19771016
ENSMUST00000152462	3.35194	0.448193	2.20215	0.137821	0.830383	up	0	0	4	0	0	0	0.0597462	0.0597462	1.46274	0.0597462	0.0597462	0.0597462	6720416L17Rik	Ensembl	chr2	-	74750432	74762896	443	bidirectional	NM_010467	Hoxd1	+	74762979	74765142
NR_015605	3.35194	0.448193	2.20215	0.137821	0.830383	up	0	0	4	0	0	0	0.0597462	0.0597462	1.46274	0.0597462	0.0597462	0.0597462	2900052N01Rik	RefSeq	chr9	+	46913602	46927366	2585	intergenic
ENSMUST00000140807	3.35194	0.448193	2.20215	0.137821	0.830383	up	0	0	4	0	0	0	0.0597462	0.0597462	1.46274	0.0597462	0.0597462	0.0597462	1700110K17Rik	Ensembl	chr9	+	40323425	40343564	737	intronic antisense	ENSMUST00000118159	Gramd1b	-	40297875	40392152
ENSMUST00000136025	3.35194	0.448193	2.20215	0.137821	0.830383	up	0	0	4	0	0	0	0.0597462	0.0597462	1.46274	0.0597462	0.0597462	0.0597462	Gm14012	Ensembl	chr2	-	128237692	128239643	677	intergenic
AK147191	3.35194	0.448193	2.20215	0.137821	0.830383	up	0	0	4	0	0	0	0.0597462	0.0597462	1.46274	0.0597462	0.0597462	0.0597462	TUname52771	Genbank	chr8	-	97983590	97984550	960	intergenic
ENSMUST00000184715	3.35194	0.448193	2.20215	0.137821	0.830383	up	0	0	4	0	0	0	0.0597462	0.0597462	1.46274	0.0597462	0.0597462	0.0597462	GNAS-AS1_1	Ensembl	chr2	+	174286607	174286671	64	intron sense-overlapping	ENSMUST00000130761	Gnas	+	174285357	174338084
ENSMUST00000138377	3.35194	0.448193	2.20215	0.137821	0.830383	up	0	0	4	0	0	0	0.0597462	0.0597462	1.46274	0.0597462	0.0597462	0.0597462	1700060J05Rik	Ensembl	chr4	-	53562982	53564697	1060	natural antisense	ENSMUST00000107651	Slc44a1	+	53440670	53567818
uc007wqe.2	3.35194	0.448193	2.20215	0.137821	0.830383	up	0	0	4	0	0	0	0.0597462	0.0597462	1.46274	0.0597462	0.0597462	0.0597462	DQ688573	UCSC_knowngene	chr15	-	78660317	78660361	44	intergenic
ENSMUST00000146978	3.35194	0.448193	2.20215	0.137821	0.830383	up	0	0	4	0	0	0	0.0597462	0.0597462	1.46274	0.0597462	0.0597462	0.0597462	Gm13869	Ensembl	chr2	-	103206208	103210357	1054	intergenic
ENSMUST00000127050	3.35194	0.448193	2.20215	0.137821	0.830383	up	0	0	4	0	0	0	0.0597462	0.0597462	1.46274	0.0597462	0.0597462	0.0597462	Tmem168	Ensembl	chr6	-	13603381	13607748	354	exon sense-overlapping	NM_028990	Tmem168	-	13580688	13608063
AK050776	3.35194	0.448193	2.20215	0.137821	0.830383	up	0	0	4	0	0	0	0.0597462	0.0597462	1.46274	0.0597462	0.0597462	0.0597462	TUname491	Genbank	chr15	+	77343137	77345226	2090	intergenic
AK037971	3.35194	0.448193	2.20215	0.137821	0.830383	up	0	0	4	0	0	0	0.0597462	0.0597462	1.46274	0.0597462	0.0597462	0.0597462	TUname60051	Genbank	chr10	+	78599121	78601874	2754	intergenic
TCONS_00006735	3.35194	0.448193	2.20215	0.137821	0.830383	up	0	0	4	0	0	0	0.0597462	0.0597462	1.46274	0.0597462	0.0597462	0.0597462	XLOC_005092	Alexander et al 2013	chr12	+	55507602	55557756	990	intergenic
ENSMUST00000176439	3.35194	0.448193	2.20215	0.137821	0.830383	up	0	0	4	0	0	0	0.0597462	0.0597462	1.46274	0.0597462	0.0597462	0.0597462	Corin	Ensembl	chr5	-	72358383	72380288	467	exon sense-overlapping	NM_001122756	Corin	-	72300024	72504540
ENSMUST00000143679	3.35194	0.448193	2.20215	0.137821	0.830383	up	0	0	4	0	0	0	0.0597462	0.0597462	1.46274	0.0597462	0.0597462	0.0597462	Speg	Ensembl	chr1	+	75423509	75427623	735	exon sense-overlapping	NM_007463	Speg	+	75375296	75432306
ENSMUST00000132130	3.35194	0.448193	2.20215	0.137821	0.830383	up	0	0	4	0	0	0	0.0597462	0.0597462	1.46274	0.0597462	0.0597462	0.0597462	Gm13838	Ensembl	chr5	-	116305681	116309360	531	intergenic
ENSMUST00000175634	3.35194	0.448193	2.20215	0.137821	0.830383	up	0	0	4	0	0	0	0.0597462	0.0597462	1.46274	0.0597462	0.0597462	0.0597462	Tgif2	Ensembl	chr2	+	156849955	156853193	594	exon sense-overlapping	ENSMUST00000109564	Tgif2	+	156840965	156855570
ENSMUST00000166403	3.35194	0.448193	2.20215	0.137821	0.830383	up	0	0	4	0	0	0	0.0597462	0.0597462	1.46274	0.0597462	0.0597462	0.0597462	Tg	Ensembl	chr15	+	66798749	66850721	1254	exon sense-overlapping	ENSMUST00000172153	Tg	+	66736249	66850721
AK053936	3.35194	0.448193	2.20215	0.137821	0.830383	up	0	0	4	0	0	0	0.0597462	0.0597462	1.46274	0.0597462	0.0597462	0.0597462	TUname11001	Genbank	chr18	-	88208122	88209930	1808	intergenic
AK144903	3.35194	0.448193	2.20215	0.137821	0.830383	up	0	0	4	0	0	0	0.0597462	0.0597462	1.46274	0.0597462	0.0597462	0.0597462	TUname41264	Genbank	chr1	-	43250155	43302927	1193	intergenic
uc007vms.1	3.35194	0.448193	2.20215	0.137821	0.830383	up	0	0	4	0	0	0	0.0597462	0.0597462	1.46274	0.0597462	0.0597462	0.0597462	AK042292	UCSC_knowngene	chr15	-	36376551	36390172	837	intergenic
ENSMUST00000129808	3.35194	0.448193	2.20215	0.137821	0.830383	up	0	0	4	0	0	0	0.0597462	0.0597462	1.46274	0.0597462	0.0597462	0.0597462	Trappc6a	Ensembl	chr7	+	19508729	19515318	955	exon sense-overlapping	ENSMUST00000108455	Trappc6a	+	19508725	19516141
ENSMUST00000184373	3.35194	0.448193	2.20215	0.137821	0.830383	up	0	0	4	0	0	0	0.0597462	0.0597462	1.46274	0.0597462	0.0597462	0.0597462	RP23-296I6.12	Ensembl	chr9	-	72618692	72619520	597	natural antisense	ENSMUST00000093820	Rfx7	+	72532239	72622937
uc029wim.1	3.35194	0.448193	2.20215	0.137821	0.830383	up	0	0	4	0	0	0	0.0597462	0.0597462	1.46274	0.0597462	0.0597462	0.0597462	DQ561464	UCSC_knowngene	chr7	-	73103026	73103081	55	intergenic
TCONS_00029079	3.35194	0.448193	2.20215	0.137821	0.830383	up	0	0	4	0	0	0	0.0597462	0.0597462	1.46274	0.0597462	0.0597462	0.0597462	XLOC_021513	Alexander et al 2013	chr7	+	42505817	42508881	626	bidirectional	ENSMUST00000174407	Zfp141	-	42473385	42505726
AK156544	3.35194	0.448193	2.20215	0.137821	0.830383	up	0	0	4	0	0	0	0.0597462	0.0597462	1.46274	0.0597462	0.0597462	0.0597462	TUname50883	Genbank	chr16	+	21261567	21265416	3851	intergenic
uc011zbu.1	3.35194	0.448193	2.20215	0.137821	0.830383	up	0	0	4	0	0	0	0.0597462	0.0597462	1.46274	0.0597462	0.0597462	0.0597462	Trip13	UCSC_knowngene	chr13	-	73929658	73936272	502	exon sense-overlapping	NM_027182	Trip13	-	73912461	73937767
uc009ryu.1	3.35194	0.448193	2.20215	0.137821	0.830383	up	0	0	4	0	0	0	0.0597462	0.0597462	1.46274	0.0597462	0.0597462	0.0597462	AK041339	UCSC_knowngene	chr9	+	116189179	116194886	943	intergenic
ENSMUST00000183438	3.35194	0.448193	2.20215	0.137821	0.830383	up	0	0	4	0	0	0	0.0597462	0.0597462	1.46274	0.0597462	0.0597462	0.0597462	RP24-465O15.1	Ensembl	chr17	-	52592980	52602660	882	bidirectional	NM_001031811	Kcnh8	+	52602708	52979194
NR_045301	3.35194	0.448193	2.20215	0.137821	0.830383	up	0	0	4	0	0	0	0.0597462	0.0597462	1.46274	0.0597462	0.0597462	0.0597462	1810008I18Rik	RefSeq	chr7	+	65804051	65806223	691	intergenic
ENSMUST00000135123	3.35194	0.448193	2.20215	0.137821	0.830383	up	0	0	4	0	0	0	0.0597462	0.0597462	1.46274	0.0597462	0.0597462	0.0597462	Ppil1	Ensembl	chr17	-	29251263	29263912	1008	exon sense-overlapping	NM_026845	Ppil1	-	29250834	29263971
AK141095	3.35194	0.448193	2.20215	0.137821	0.830383	up	0	0	4	0	0	0	0.0597462	0.0597462	1.46274	0.0597462	0.0597462	0.0597462	TUname907	Genbank	chr6	+	101144291	101147150	2858	intergenic
ENSMUST00000056786	3.35194	0.448193	2.20215	0.137821	0.830383	up	0	0	4	0	0	0	0.0597462	0.0597462	1.46274	0.0597462	0.0597462	0.0597462	Gm9840	Ensembl	chr17	-	35935461	35935963	502	intergenic
ENSMUST00000162315	3.35194	0.448193	2.20215	0.137821	0.830383	up	0	0	4	0	0	0	0.0597462	0.0597462	1.46274	0.0597462	0.0597462	0.0597462	AY512915	Ensembl	chr6	-	95255725	95333991	676	intronic antisense	ENSMUST00000089304	Gm10234	+	95322111	95322210
ENSMUST00000134909	3.35194	0.448193	2.20215	0.137821	0.830383	up	0	0	4	0	0	0	0.0597462	0.0597462	1.46274	0.0597462	0.0597462	0.0597462	Rnf135	Ensembl	chr11	+	80184222	80190011	333	exon sense-overlapping	NM_028019	Rnf135	+	80183871	80199753
ENSMUST00000180787	3.35194	0.448193	2.20215	0.137821	0.830383	up	0	0	4	0	0	0	0.0597462	0.0597462	1.46274	0.0597462	0.0597462	0.0597462	Gm18336	Ensembl	chrX	-	73396858	73398892	1192	intergenic
ENSMUST00000117240	3.35194	0.448193	2.20215	0.137821	0.830383	up	0	0	4	0	0	0	0.0597462	0.0597462	1.46274	0.0597462	0.0597462	0.0597462	Gm11989	Ensembl	chr11	-	8383181	8383853	672	intergenic
AK155963	3.35194	0.448193	2.20215	0.137821	0.830383	up	0	0	4	0	0	0	0.0597462	0.0597462	1.46274	0.0597462	0.0597462	0.0597462	TUname44856	Genbank	chr2	-	57692280	57695167	2899	intergenic
ENSMUST00000110047	3.35194	0.448193	2.20215	0.137821	0.830383	up	0	0	4	0	0	0	0.0597462	0.0597462	1.46274	0.0597462	0.0597462	0.0597462	Tc2n	Ensembl	chr12	-	101646564	101711905	2587	exon sense-overlapping	ENSMUST00000162735	Tc2n	-	101645442	101718523
uc007ftg.1	3.35194	0.448193	2.20215	0.137821	0.830383	up	0	0	4	0	0	0	0.0597462	0.0597462	1.46274	0.0597462	0.0597462	0.0597462	DQ556157	UCSC_knowngene	chr10	+	75860135	75860167	32	natural antisense	NM_010798	Mif	-	75859352	75860250
AK139135	3.35194	0.448193	2.20215	0.137821	0.830383	up	0	0	4	0	0	0	0.0597462	0.0597462	1.46274	0.0597462	0.0597462	0.0597462	TUname28285	Genbank	chr3	+	151333348	151337638	2204	intergenic
ENSMUST00000175814	3.35194	0.448193	2.20215	0.137821	0.830383	up	0	0	4	0	0	0	0.0597462	0.0597462	1.46274	0.0597462	0.0597462	0.0597462	Gm20619	Ensembl	chr6	+	6248689	6378675	2008	intergenic
NR_045389	3.35194	0.448193	2.20215	0.137821	0.830383	up	0	0	4	0	0	0	0.0597462	0.0597462	1.46274	0.0597462	0.0597462	0.0597462	2210420H20Rik	RefSeq	chr18	-	82754504	82759039	627	intergenic
AK135920	3.35194	0.448193	2.20215	0.137821	0.830383	up	0	0	4	0	0	0	0.0597462	0.0597462	1.46274	0.0597462	0.0597462	0.0597462	TUname50752	Genbank	chr12	-	106094822	106098976	1170	intergenic
ENSMUST00000175729	3.35194	0.448193	2.20215	0.137821	0.830383	up	0	0	4	0	0	0	0.0597462	0.0597462	1.46274	0.0597462	0.0597462	0.0597462	4921523L03Rik	Ensembl	chr9	-	107991683	107995656	1186	natural antisense	ENSMUST00000177173	Cdhr4	+	107992496	107999684
ENSMUST00000176692	3.35194	0.448193	2.20215	0.137821	0.830383	up	0	0	4	0	0	0	0.0597462	0.0597462	1.46274	0.0597462	0.0597462	0.0597462	Slc13a1	Ensembl	chr6	-	24134841	24168090	2598	exon sense-overlapping	NM_019481	Slc13a1	-	24088282	24168092
ENSMUST00000117511	3.35194	0.448193	2.20215	0.137821	0.830383	up	0	0	4	0	0	0	0.0597462	0.0597462	1.46274	0.0597462	0.0597462	0.0597462	Gm12149	Ensembl	chr11	-	43615116	43616329	654	intergenic
ENSMUST00000116535	3.35194	0.448193	2.20215	0.137821	0.830383	up	0	0	4	0	0	0	0.0597462	0.0597462	1.46274	0.0597462	0.0597462	0.0597462	Fam220-ps	Ensembl	chrX	+	75143687	75144470	783	intergenic
uc008qdo.1	3.35194	0.448193	2.20215	0.137821	0.830383	up	0	0	4	0	0	0	0.0597462	0.0597462	1.46274	0.0597462	0.0597462	0.0597462	AK137696	UCSC_knowngene	chr3	+	92170220	92177907	4809	intergenic
ENSMUST00000185060	3.35194	0.448193	2.20215	0.137821	0.830383	up	0	0	4	0	0	0	0.0597462	0.0597462	1.46274	0.0597462	0.0597462	0.0597462	HYMAI	Ensembl	chr10	-	13091580	13091817	237	natural antisense	ENSMUST00000121766	Plagl1	+	13090834	13130969
uc008zhk.1	3.35194	0.448193	2.20215	0.137821	0.830383	up	0	0	4	0	0	0	0.0597462	0.0597462	1.46274	0.0597462	0.0597462	0.0597462	Tpcn1	UCSC_knowngene	chr5	-	120534156	120555221	3775	exon sense-overlapping	uc008zhl.1	Tpcn1	-	120534156	120560395
ENSMUST00000141987	3.35194	0.448193	2.20215	0.137821	0.830383	up	0	0	4	0	0	0	0.0597462	0.0597462	1.46274	0.0597462	0.0597462	0.0597462	Atpaf2	Ensembl	chr11	-	60407372	60418457	405	exon sense-overlapping	NM_145427	Atpaf2	-	60400623	60417099
AK002968	3.35194	0.448193	2.20215	0.137821	0.830383	up	0	0	4	0	0	0	0.0597462	0.0597462	1.46274	0.0597462	0.0597462	0.0597462	TUname41214	Genbank	chr16	-	90549863	90550179	316	intergenic
AK044048	3.35194	0.448193	2.20215	0.137821	0.830383	up	0	0	4	0	0	0	0.0597462	0.0597462	1.46274	0.0597462	0.0597462	0.0597462	TUname19797	Genbank	chr1	-	180892100	180894036	1943	natural antisense	NM_177099	Lefty2	+	180893118	180899102
AK145281	3.35194	0.448193	2.20215	0.137821	0.830383	up	0	0	4	0	0	0	0.0597462	0.0597462	1.46274	0.0597462	0.0597462	0.0597462	TUname14935	Genbank	chr18	-	72908889	72921090	2298	intergenic
AK039578	3.35194	0.448193	2.20215	0.137821	0.830383	up	0	0	4	0	0	0	0.0597462	0.0597462	1.46274	0.0597462	0.0597462	0.0597462	TUname22656	Genbank	chr3	+	51991340	51991959	619	intronic antisense	NM_001004176	Maml3	-	51687612	52105006
ENSMUST00000146666	3.35194	0.448193	2.20215	0.137821	0.830383	up	0	0	4	0	0	0	0.0597462	0.0597462	1.46274	0.0597462	0.0597462	0.0597462	Ttc12	Ensembl	chr9	-	49457577	49486215	1825	exon sense-overlapping	NM_172770	Ttc12	-	49436960	49486225
ENSMUST00000175708	3.35194	0.448193	2.20215	0.137821	0.830383	up	0	0	4	0	0	0	0.0597462	0.0597462	1.46274	0.0597462	0.0597462	0.0597462	Vmn1r-ps23	Ensembl	chr6	-	58504442	58504737	295	intergenic
uc008yai.1	3.35194	0.448193	2.20215	0.137821	0.830383	up	0	0	4	0	0	0	0.0597462	0.0597462	1.46274	0.0597462	0.0597462	0.0597462	AK042933	UCSC_knowngene	chr5	+	88793895	88813470	716	intergenic
uc007xbe.1	3.35194	0.448193	2.20215	0.137821	0.830383	up	0	0	4	0	0	0	0.0597462	0.0597462	1.46274	0.0597462	0.0597462	0.0597462	Bik	UCSC_knowngene	chr15	+	83526871	83541442	618	exon sense-overlapping	NM_007546	Bik	+	83526861	83544635
ENSMUST00000133004	3.35194	0.448193	2.20215	0.137821	0.830383	up	0	0	4	0	0	0	0.0597462	0.0597462	1.46274	0.0597462	0.0597462	0.0597462	Ap1g2	Ensembl	chr14	-	55099053	55106132	2307	exon sense-overlapping	ENSMUST00000170285	Ap1g2	-	55098854	55106147
AK040511	3.35194	0.448193	2.20215	0.137821	0.830383	up	0	0	4	0	0	0	0.0597462	0.0597462	1.46274	0.0597462	0.0597462	0.0597462	TUname60767	Genbank	chr2	+	101991976	102010299	1923	intronic antisense	NM_178886	Ldlrad3	-	101950200	102186377
AK156665	3.35194	0.448193	2.20215	0.137821	0.830383	up	0	0	4	0	0	0	0.0597462	0.0597462	1.46274	0.0597462	0.0597462	0.0597462	TUname29461	Genbank	chr9	-	88916939	88922616	5680	intergenic
AI158786_1	3.35194	0.448193	2.20215	0.137821	0.830383	up	0	0	4	0	0	0	0.0597462	0.0597462	1.46274	0.0597462	0.0597462	0.0597462
ENSMUST00000121712	3.35194	0.448193	2.20215	0.137821	0.830383	up	0	0	4	0	0	0	0.0597462	0.0597462	1.46274	0.0597462	0.0597462	0.0597462	Gm13221	Ensembl	chr2	-	9270079	9270509	430	intergenic
ENSMUST00000117877	3.35194	0.448193	2.20215	0.137821	0.830383	up	0	0	4	0	0	0	0.0597462	0.0597462	1.46274	0.0597462	0.0597462	0.0597462	Gm11873	Ensembl	chr4	+	20391095	20392399	1304	intronic antisense	uc008scn.1	Nkain3	-	20282815	20778668
ENSMUST00000147128	3.35194	0.448193	2.20215	0.137821	0.830383	up	0	0	4	0	0	0	0.0597462	0.0597462	1.46274	0.0597462	0.0597462	0.0597462	Gm14136	Ensembl	chr2	-	150704535	150706876	768	intergenic
AK157428	3.35194	0.448193	2.20215	0.137821	0.830383	up	0	0	4	0	0	0	0.0597462	0.0597462	1.46274	0.0597462	0.0597462	0.0597462	TUname29707	Genbank	chr3	+	66086686	66087792	1112	natural antisense	NM_145820	Veph1	-	66053557	66296837
NR_046077	3.35194	0.448193	2.20215	0.137821	0.830383	up	0	0	4	0	0	0	0.0597462	0.0597462	1.46274	0.0597462	0.0597462	0.0597462	Gm4265	RefSeq	chr7	+	129962164	129978669	674	intergenic
TCONS_00034148	3.35194	0.448193	2.20215	0.137821	0.830383	up	0	0	4	0	0	0	0.0597462	0.0597462	1.46274	0.0597462	0.0597462	0.0597462	XLOC_025726	Alexander et al 2013	chr9	-	40195774	40240085	1889	intronic antisense	NM_030713	Zfp202	+	40192315	40213604
ENSMUST00000179324	3.35194	0.448193	2.20215	0.137821	0.830383	up	0	0	4	0	0	0	0.0597462	0.0597462	1.46274	0.0597462	0.0597462	0.0597462	Gm2373	Ensembl	chr13	+	97482700	97497007	2764	intergenic
AK133710	3.35194	0.448193	2.20215	0.137821	0.830383	up	0	0	4	0	0	0	0.0597462	0.0597462	1.46274	0.0597462	0.0597462	0.0597462	TUname37705	Genbank	chr5	-	32136172	32137187	1016	natural antisense	NM_008037	Fosl2	+	32136471	32157839
NR_046061	3.35194	0.448193	2.20215	0.137821	0.830383	up	0	0	4	0	0	0	0.0597462	0.0597462	1.46274	0.0597462	0.0597462	0.0597462	Gm10782	RefSeq	chr13	+	56362899	56368857	1480	exon sense-overlapping	ENSMUST00000099476	Gm10782	+	56362900	56365769
ENSMUST00000120906	3.35194	0.448193	2.20215	0.137821	0.830383	up	0	0	4	0	0	0	0.0597462	0.0597462	1.46274	0.0597462	0.0597462	0.0597462	Gm12093	Ensembl	chr11	-	29688240	29689835	1405	intergenic
ENSMUST00000123754	3.35194	0.448193	2.20215	0.137821	0.830383	up	0	0	4	0	0	0	0.0597462	0.0597462	1.46274	0.0597462	0.0597462	0.0597462	Pno1	Ensembl	chr11	-	17208788	17211054	503	exon sense-overlapping	NM_025443	Pno1	-	17203199	17211589
AK148763	3.35194	0.448193	2.20215	0.137821	0.830383	up	0	0	4	0	0	0	0.0597462	0.0597462	1.46274	0.0597462	0.0597462	0.0597462	TUname3480	Genbank	chr5	+	75737881	75740205	2323	intergenic
ENSMUST00000168543	3.35194	0.448193	2.20215	0.137821	0.830383	up	0	0	4	0	0	0	0.0597462	0.0597462	1.46274	0.0597462	0.0597462	0.0597462	1700110I01Rik	Ensembl	chr14	+	3262339	3263717	714	exon sense-overlapping	ENSMUST00000112812	1700110I01Rik	+	3262401	3305831
uc007pqp.1	3.35194	0.448193	2.20215	0.137821	0.830383	up	0	0	4	0	0	0	0.0597462	0.0597462	1.46274	0.0597462	0.0597462	0.0597462	DQ702757	UCSC_knowngene	chr13	-	21504253	21504286	33	intergenic
AK017062	3.35194	0.448193	2.20215	0.137821	0.830383	up	0	0	4	0	0	0	0.0597462	0.0597462	1.46274	0.0597462	0.0597462	0.0597462	TUname9284	Genbank	chr18	-	54494692	54496584	1320	intergenic
ENSMUST00000105109	3.35194	0.448193	2.20215	0.137821	0.830383	up	0	0	4	0	0	0	0.0597462	0.0597462	1.46274	0.0597462	0.0597462	0.0597462	Gm14762	Ensembl	chrX	+	85825891	85827662	1771	intron sense-overlapping	uc009trz.2	5430427O19Rik	+	85821944	85891499
ENSMUST00000118610	3.35194	0.448193	2.20215	0.137821	0.830383	up	0	0	4	0	0	0	0.0597462	0.0597462	1.46274	0.0597462	0.0597462	0.0597462	Gm12954	Ensembl	chr4	-	119501864	119502546	611	intergenic
TCONS_00012129	3.35194	0.448193	2.20215	0.137821	0.830383	up	0	0	4	0	0	0	0.0597462	0.0597462	1.46274	0.0597462	0.0597462	0.0597462	XLOC_009064	Alexander et al 2013	chr16	+	30694624	30699223	383	intergenic
AK019786	3.35194	0.448193	2.20215	0.137821	0.830383	up	0	0	4	0	0	0	0.0597462	0.0597462	1.46274	0.0597462	0.0597462	0.0597462	TUname16703	Genbank	chr4	+	116708124	116708432	310	natural antisense	NM_025962	Mmachc	-	116702433	116708385
ENSMUST00000149948	3.35194	0.448193	2.20215	0.137821	0.830383	up	0	0	4	0	0	0	0.0597462	0.0597462	1.46274	0.0597462	0.0597462	0.0597462	Rab40b	Ensembl	chr11	-	121358001	121388065	413	exon sense-overlapping	NM_139147	Rab40b	-	121356120	121388251
AK156121	3.35174	1.19466	2.77235	0.095908	0.830383	up	6	5	2	1	0	0	2.19633	1.9249	0.925468	0.626355	0.0597462	0.0597462	TUname33474	Genbank	chr3	+	7696474	7700714	4216	intergenic
AK149207_1	3.34608	1.72498	4.61895	0.0316225	0.830383	up	7	15	1	0	1	1	2.37108	3.21827	0.556593	0.0597462	0.621297	0.718048
ENSMUST00000168625	3.34553	1.21308	2.80478	0.093986	0.830383	up	1	7	6	0	1	0	0.707016	2.29249	1.85333	0.0597462	0.621297	0.0597462	Gm17108	Ensembl	chr13	-	69610497	69614901	2877	natural antisense	ENSMUST00000022087	Nsun2	+	69612243	69635780
AK137656	3.34145	2.15501	6.92866	0.00848357	0.828985	up	10	14	12	0	0	3	2.79571	3.13023	2.62863	0.0597462	0.0597462	1.51111	TUname25852	Genbank	chr10	-	31448256	31452082	3827	intergenic
ENSMUST00000087327	3.33557	1.20875	2.78145	0.0953643	0.830383	up	6	0	8	0	1	0	2.19633	0.0597462	2.16039	0.0597462	0.621297	0.0597462	Rell1	Ensembl	chr5	-	63909651	63968822	2505	exon sense-overlapping	NM_145923	Rell1	-	63908897	63968897
ENSMUST00000130087	3.33437	1.21149	2.78479	0.095166	0.830383	up	0	8	6	1	0	0	0.0597462	2.44625	1.85333	0.626355	0.0597462	0.0597462	Dcun1d4	Ensembl	chr5	+	73484443	73557700	1085	exon sense-overlapping	NM_001190733	Dcun1d4	+	73491025	73560794
AK034041	3.33196	1.22877	2.81936	0.0931361	0.830383	up	2	1	12	0	1	0	1.15223	0.671968	2.62863	0.0597462	0.621297	0.0597462	TUname46752	Genbank	chr2	+	38500191	38505048	4857	intergenic
ENSMUST00000154075	3.32716	1.23794	2.80739	0.0938333	0.830383	up	4	6	4	0	0	1	1.76674	2.12037	1.46274	0.0597462	0.0597462	0.718048	Cd97	Ensembl	chr8	-	83727547	83728330	588	exon sense-overlapping	NM_011925	Cd97	-	83723250	83741311
AK157131	3.32305	1.18471	2.71321	0.0995231	0.830383	up	1	10	2	0	1	0	0.707016	2.71192	0.925468	0.0597462	0.621297	0.0597462	TUname9250	Genbank	chr13	-	8884913	8885823	912	natural antisense	NM_145360	Idi1	+	8885605	8892396
TCONS_00009562	3.31821	1.27396	2.86935	0.0902838	0.830383	up	2	0	14	0	0	1	1.15223	0.0597462	2.81586	0.0597462	0.0597462	0.718048	XLOC_007354	Alexander et al 2013	chr14	+	75893863	75896605	2076	intergenic
ENSMUST00000145989	3.3129	1.1589	2.64252	0.104041	0.830383	up	10	2	0	1	0	0	2.79571	1.10044	0.0597462	0.626355	0.0597462	0.0597462	Tmc7	Ensembl	chr7	-	118564238	118566627	570	exon sense-overlapping	NM_172476	Tmc7	-	118535843	118584686
ENSMUST00000119279	3.30886	1.20116	2.72899	0.0985441	0.830383	up	2	4	8	0	1	0	1.15223	1.69872	2.16039	0.0597462	0.621297	0.0597462	Gm11366	Ensembl	chr13	+	30181715	30182144	429	intron sense-overlapping	ENSMUST00000152798	Mboat1	+	30136530	30232033
ENSMUST00000173766	3.29805	3.02604	15.3938	8.73204e-05	0.0612122	up	48	9	14	1	2	4	4.87623	2.58519	2.81586	0.626355	1.02449	1.78784	Nlrp5-ps	Ensembl	chr7	-	14561359	14609289	3105	exon sense-overlapping	NM_001244031	Vmn1r90	-	14561241	14562171
ENSMUST00000147310	3.29247	1.17449	2.6501	0.103546	0.830383	up	3	6	4	0	1	0	1.49196	2.12037	1.46274	0.0597462	0.621297	0.0597462	Sqrdl	Ensembl	chr2	+	122784943	122788018	467	exon sense-overlapping	NM_021507	Sqrdl	+	122781998	122809551
ENSMUST00000144134	3.28301	0.395734	2.09759	0.147534	0.830383	up	3	0	0	0	0	0	1.49196	0.0597462	0.0597462	0.0597462	0.0597462	0.0597462	Gm15564	Ensembl	chr16	-	35966774	35981141	545	intronic antisense	ENSMUST00000023622	Parp9	+	35939010	35972605
ENSMUST00000125610	3.28301	0.395734	2.09759	0.147534	0.830383	up	3	0	0	0	0	0	1.49196	0.0597462	0.0597462	0.0597462	0.0597462	0.0597462	Fam73b	Ensembl	chr2	+	30378234	30382007	396	exon sense-overlapping	ENSMUST00000176517	Fam73b	+	30381943	30384206
ENSMUST00000155160	3.28301	0.395734	2.09759	0.147534	0.830383	up	3	0	0	0	0	0	1.49196	0.0597462	0.0597462	0.0597462	0.0597462	0.0597462	Cep250	Ensembl	chr2	+	155979557	155981445	352	exon sense-overlapping	NM_001130000	Cep250	+	155956557	155998900
ENSMUST00000135649	3.28301	0.395734	2.09759	0.147534	0.830383	up	3	0	0	0	0	0	1.49196	0.0597462	0.0597462	0.0597462	0.0597462	0.0597462	Mapk3	Ensembl	chr7	+	126763276	126764360	480	exon sense-overlapping	ENSMUST00000091328	Mapk3	+	126760596	126765819
ENSMUST00000169093	3.28301	0.395734	2.09759	0.147534	0.830383	up	3	0	0	0	0	0	1.49196	0.0597462	0.0597462	0.0597462	0.0597462	0.0597462	Vars2	Ensembl	chr17	-	35659687	35661969	832	exon sense-overlapping	NM_175137	Vars2	-	35655634	35667592
ENSMUST00000152046	3.28301	0.395734	2.09759	0.147534	0.830383	up	3	0	0	0	0	0	1.49196	0.0597462	0.0597462	0.0597462	0.0597462	0.0597462	Eps8	Ensembl	chr6	-	137517094	137519703	364	exon sense-overlapping	ENSMUST00000132920	Eps8	-	137517070	137654876
uc008kzu.2	3.28301	0.395734	2.09759	0.147534	0.830383	up	3	0	0	0	0	0	1.49196	0.0597462	0.0597462	0.0597462	0.0597462	0.0597462	DQ548404	UCSC_knowngene	chr2	+	92553937	92554022	85	intergenic
ENSMUST00000134638	3.28301	0.395734	2.09759	0.147534	0.830383	up	3	0	0	0	0	0	1.49196	0.0597462	0.0597462	0.0597462	0.0597462	0.0597462	Capn5	Ensembl	chr7	-	98145515	98162210	668	exon sense-overlapping	ENSMUST00000155056	Capn5	-	98161980	98164962
uc029sgz.1	3.28301	0.395734	2.09759	0.147534	0.830383	up	3	0	0	0	0	0	1.49196	0.0597462	0.0597462	0.0597462	0.0597462	0.0597462	DQ548996	UCSC_knowngene	chr14	+	24096392	24096423	31	intergenic
AA546430	3.28301	0.395734	2.09759	0.147534	0.830383	up	3	0	0	0	0	0	1.49196	0.0597462	0.0597462	0.0597462	0.0597462	0.0597462	TUname63147	Genbank	chr14	+	71728354	71728798	497	intergenic
ENSMUST00000150786	3.28301	0.395734	2.09759	0.147534	0.830383	up	3	0	0	0	0	0	1.49196	0.0597462	0.0597462	0.0597462	0.0597462	0.0597462	Ehmt2	Ensembl	chr17	+	34905239	34906040	726	exon sense-overlapping	ENSMUST00000124846	Ehmt2	+	34906001	34908558
ENSMUST00000120662	3.28301	0.395734	2.09759	0.147534	0.830383	up	3	0	0	0	0	0	1.49196	0.0597462	0.0597462	0.0597462	0.0597462	0.0597462	Mup-ps13	Ensembl	chr4	+	61534229	61536973	545	intronic antisense	uc008tbc.2	LOC100048884	-	61224306	61674094
ENSMUST00000170683	3.28301	0.395734	2.09759	0.147534	0.830383	up	3	0	0	0	0	0	1.49196	0.0597462	0.0597462	0.0597462	0.0597462	0.0597462	Pde7b	Ensembl	chr10	-	20479626	20725032	550	exon sense-overlapping	ENSMUST00000169404	Pde7b	-	20400417	20548328
ENSMUST00000140711	3.28301	0.395734	2.09759	0.147534	0.830383	up	3	0	0	0	0	0	1.49196	0.0597462	0.0597462	0.0597462	0.0597462	0.0597462	Arhgap22	Ensembl	chr14	+	33351311	33362575	462	exon sense-overlapping	ENSMUST00000111955	Arhgap22	+	33319702	33369934
ENSMUST00000131324	3.28301	0.395734	2.09759	0.147534	0.830383	up	3	0	0	0	0	0	1.49196	0.0597462	0.0597462	0.0597462	0.0597462	0.0597462	0610025J13Rik	Ensembl	chr4	+	98321397	98322850	652	intergenic
ENSMUST00000159944	3.28301	0.395734	2.09759	0.147534	0.830383	up	3	0	0	0	0	0	1.49196	0.0597462	0.0597462	0.0597462	0.0597462	0.0597462	Cldn25	Ensembl	chr16	+	58728022	58732989	805	exon sense-overlapping	NM_171826	Cldn25	+	58727909	58734247
NR_027809	3.28301	0.395734	2.09759	0.147534	0.830383	up	3	0	0	0	0	0	1.49196	0.0597462	0.0597462	0.0597462	0.0597462	0.0597462	Mthfr	RefSeq	chr4	+	148041188	148059562	5016	exon sense-overlapping	uc008vtv.1	Mthfr	+	148039158	148043663
ENSMUST00000123966	3.28301	0.395734	2.09759	0.147534	0.830383	up	3	0	0	0	0	0	1.49196	0.0597462	0.0597462	0.0597462	0.0597462	0.0597462	4931422A03Rik	Ensembl	chr2	-	103966942	104027793	326	exon sense-overlapping	ENSMUST00000056170	4931422A03Rik	-	103992494	104028308
uc008lah.2	3.28301	0.395734	2.09759	0.147534	0.830383	up	3	0	0	0	0	0	1.49196	0.0597462	0.0597462	0.0597462	0.0597462	0.0597462	DQ718211	UCSC_knowngene	chr2	+	92561918	92561984	66	intergenic
uc029qup.1	3.28301	0.395734	2.09759	0.147534	0.830383	up	3	0	0	0	0	0	1.49196	0.0597462	0.0597462	0.0597462	0.0597462	0.0597462	Cd244	UCSC_knowngene	chr1	+	171579062	171585316	2741	exon sense-overlapping	NM_018729	Cd244	+	171559192	171585316
ENSMUST00000142483	3.28301	0.395734	2.09759	0.147534	0.830383	up	3	0	0	0	0	0	1.49196	0.0597462	0.0597462	0.0597462	0.0597462	0.0597462	Pold1	Ensembl	chr7	-	44535015	44535958	849	exon sense-overlapping	NM_011131	Pold1	-	44532743	44548815
NR_040473	3.28301	0.395734	2.09759	0.147534	0.830383	up	3	0	0	0	0	0	1.49196	0.0597462	0.0597462	0.0597462	0.0597462	0.0597462	4930440C22Rik	RefSeq	chr1	+	94797441	94802472	1565	intergenic
ENSMUST00000142793	3.28301	0.395734	2.09759	0.147534	0.830383	up	3	0	0	0	0	0	1.49196	0.0597462	0.0597462	0.0597462	0.0597462	0.0597462	Cd1d1	Ensembl	chr3	-	86998388	86999341	667	exon sense-overlapping	NM_007639	Cd1d1	-	86995835	86999340
ENSMUST00000160213	3.28301	0.395734	2.09759	0.147534	0.830383	up	3	0	0	0	0	0	1.49196	0.0597462	0.0597462	0.0597462	0.0597462	0.0597462	Samhd1	Ensembl	chr2	-	157101693	157110612	681	exon sense-overlapping	NM_018851	Samhd1	-	157097528	157135222
ENSMUST00000153370	3.28301	0.395734	2.09759	0.147534	0.830383	up	3	0	0	0	0	0	1.49196	0.0597462	0.0597462	0.0597462	0.0597462	0.0597462	Card9	Ensembl	chr2	-	26352186	26352775	516	exon sense-overlapping	NM_001037747	Card9	-	26352311	26359547
ENSMUST00000126807	3.28301	0.395734	2.09759	0.147534	0.830383	up	3	0	0	0	0	0	1.49196	0.0597462	0.0597462	0.0597462	0.0597462	0.0597462	Gm14308	Ensembl	chr2	-	176613363	176625630	685	exon sense-overlapping	NM_001100415	Gm14430	-	176619932	176636319
uc008hgf.1	3.28301	0.395734	2.09759	0.147534	0.830383	up	3	0	0	0	0	0	1.49196	0.0597462	0.0597462	0.0597462	0.0597462	0.0597462	AK080187	UCSC_knowngene	chr19	-	34240336	34241546	1210	exon sense-overlapping	NM_007392	Acta2	-	34240335	34255373
ENSMUST00000162147	3.28301	0.395734	2.09759	0.147534	0.830383	up	3	0	0	0	0	0	1.49196	0.0597462	0.0597462	0.0597462	0.0597462	0.0597462	Prkg2	Ensembl	chr5	-	98931267	98943834	1389	exon sense-overlapping	NM_008926	Prkg2	-	98929772	99037079
TCONS_00017233	3.28301	0.395734	2.09759	0.147534	0.830383	up	3	0	0	0	0	0	1.49196	0.0597462	0.0597462	0.0597462	0.0597462	0.0597462	XLOC_012891	Alexander et al 2013	chr2	+	61533508	61539183	376	intergenic
ENSMUST00000130683	3.28301	0.395734	2.09759	0.147534	0.830383	up	3	0	0	0	0	0	1.49196	0.0597462	0.0597462	0.0597462	0.0597462	0.0597462	1700095B22Rik	Ensembl	chr3	-	105448188	105452955	1091	natural antisense	NM_001039347	Kcnd3	+	105452329	105674002
ENSMUST00000132495	3.28301	0.395734	2.09759	0.147534	0.830383	up	3	0	0	0	0	0	1.49196	0.0597462	0.0597462	0.0597462	0.0597462	0.0597462	Qsox1	Ensembl	chr1	-	155794342	155795417	373	exon sense-overlapping	NM_023268	Qsox1	-	155778154	155812899
uc007kda.1	3.28301	0.395734	2.09759	0.147534	0.830383	up	3	0	0	0	0	0	1.49196	0.0597462	0.0597462	0.0597462	0.0597462	0.0597462	BC127131	UCSC_knowngene	chr11	-	75159115	75159685	570	natural antisense	NM_001002764	Smg6	+	74925871	75164448
ENSMUST00000143493	3.28301	0.395734	2.09759	0.147534	0.830383	up	3	0	0	0	0	0	1.49196	0.0597462	0.0597462	0.0597462	0.0597462	0.0597462	Procr	Ensembl	chr2	+	155751343	155755468	1608	exon sense-overlapping	NM_011171	Procr	+	155751216	155755478
ENSMUST00000137475	3.28301	0.395734	2.09759	0.147534	0.830383	up	3	0	0	0	0	0	1.49196	0.0597462	0.0597462	0.0597462	0.0597462	0.0597462	Amfr	Ensembl	chr8	-	93972957	93973961	392	exon sense-overlapping	NM_011787	Amfr	-	93971587	94012640
ENSMUST00000169976	3.28301	0.395734	2.09759	0.147534	0.830383	up	3	0	0	0	0	0	1.49196	0.0597462	0.0597462	0.0597462	0.0597462	0.0597462	Sec23a	Ensembl	chr12	-	58972989	58982704	370	exon sense-overlapping	NM_009147	Sec23a	-	58958383	59012017
ENSMUST00000182953	3.28301	0.395734	2.09759	0.147534	0.830383	up	3	0	0	0	0	0	1.49196	0.0597462	0.0597462	0.0597462	0.0597462	0.0597462	Miat	Ensembl	chr5	-	112213227	112229395	9163	intergenic
uc029xln.1	3.28301	0.395734	2.09759	0.147534	0.830383	up	3	0	0	0	0	0	1.49196	0.0597462	0.0597462	0.0597462	0.0597462	0.0597462	AB335744	UCSC_knowngene	chrX	-	92441526	92441547	21	intron sense-overlapping	NM_173783	Mageb18	-	92118878	92599572
AK006261	3.28301	0.395734	2.09759	0.147534	0.830383	up	3	0	0	0	0	0	1.49196	0.0597462	0.0597462	0.0597462	0.0597462	0.0597462	TUname39282	Genbank	chr17	-	29093415	29094461	1047	natural antisense	NM_007669	Cdkn1a	+	29093771	29100722
ENSMUST00000151371	3.28301	0.395734	2.09759	0.147534	0.830383	up	3	0	0	0	0	0	1.49196	0.0597462	0.0597462	0.0597462	0.0597462	0.0597462	Nek3	Ensembl	chr8	-	22128685	22132302	614	exon sense-overlapping	ENSMUST00000110730	Nek3	-	22128282	22166435
ENSMUST00000149701	3.28301	0.395734	2.09759	0.147534	0.830383	up	3	0	0	0	0	0	1.49196	0.0597462	0.0597462	0.0597462	0.0597462	0.0597462	Sh3bp5l	Ensembl	chr11	+	58331042	58331509	329	exon sense-overlapping	NM_024480	Sh3bp5l	+	58330717	58347728
uc029xdg.1	3.28301	0.395734	2.09759	0.147534	0.830383	up	3	0	0	0	0	0	1.49196	0.0597462	0.0597462	0.0597462	0.0597462	0.0597462	DQ706019	UCSC_knowngene	chr9	-	67728907	67728958	51	intergenic
ENSMUST00000121165	3.28301	0.395734	2.09759	0.147534	0.830383	up	3	0	0	0	0	0	1.49196	0.0597462	0.0597462	0.0597462	0.0597462	0.0597462	Gm14506	Ensembl	chrX	-	13490497	13491033	536	intergenic
uc029rzw.1	3.28301	0.395734	2.09759	0.147534	0.830383	up	3	0	0	0	0	0	1.49196	0.0597462	0.0597462	0.0597462	0.0597462	0.0597462	AB351889	UCSC_knowngene	chr13	-	34140761	34140809	48	intergenic
uc008lbl.2	3.28301	0.395734	2.09759	0.147534	0.830383	up	3	0	0	0	0	0	1.49196	0.0597462	0.0597462	0.0597462	0.0597462	0.0597462	DQ698274	UCSC_knowngene	chr2	+	92571806	92571883	77	intergenic
ENSMUST00000148789	3.28301	0.395734	2.09759	0.147534	0.830383	up	3	0	0	0	0	0	1.49196	0.0597462	0.0597462	0.0597462	0.0597462	0.0597462	St14	Ensembl	chr9	-	31099403	31131796	2686	exon sense-overlapping	NM_011176	St14	-	31088589	31131799
AK078619	3.28301	0.395734	2.09759	0.147534	0.830383	up	3	0	0	0	0	0	1.49196	0.0597462	0.0597462	0.0597462	0.0597462	0.0597462	TUname36812	Genbank	chr15	-	74832770	74834750	1980	natural antisense	uc011zuf.1	Hemt1	+	74819075	74834871
ENSMUST00000177264	3.28175	1.21333	2.71804	0.0992222	0.830383	up	1	0	14	0	1	0	0.707016	0.0597462	2.81586	0.0597462	0.621297	0.0597462	Gm6695	Ensembl	chr6	+	58091075	58092669	1594	intergenic
2_00033909	3.28149	1.14748	2.57768	0.108383	0.830383	up	8	3	1	0	1	0	2.52693	1.43038	0.556593	0.0597462	0.621297	0.0597462	XLOC_019815	Lei Sun et al 2012	chrX	-	150980180	150981638	213	intergenic
ENSMUST00000168250	3.27626	1.1468	2.56963	0.108936	0.830383	up	4	8	0	0	1	0	1.76674	2.44625	0.0597462	0.0597462	0.621297	0.0597462	4930523C07Rik	Ensembl	chr1	+	160044383	160071536	694	exon sense-overlapping	NM_001162896	4930523C07Rik	+	160044379	160078586
ENSMUST00000139430	3.26977	1.14582	2.55775	0.109757	0.830383	up	7	4	1	1	0	0	2.37108	1.69872	0.556593	0.626355	0.0597462	0.0597462	Drg1	Ensembl	chr11	-	3250096	3252859	608	exon sense-overlapping	NM_007879	Drg1	-	3249921	3266386
ENSMUST00000143858	3.26802	1.14453	2.55253	0.11012	0.830383	up	10	0	2	1	0	0	2.79571	0.0597462	0.925468	0.626355	0.0597462	0.0597462	Qtrtd1	Ensembl	chr16	-	43862783	43867555	664	exon sense-overlapping	NM_029128	Qtrtd1	-	43861412	43889676
ENSMUST00000156906	3.26212	0.393335	2.0797	0.149272	0.830383	up	2	1	0	0	0	0	1.15223	0.671968	0.0597462	0.0597462	0.0597462	0.0597462	Mmp23	Ensembl	chr4	-	155650656	155652025	1183	exon sense-overlapping	NM_011985	Mmp23	-	155650654	155653384
CB202423	3.26212	0.393335	2.0797	0.149272	0.830383	up	2	1	0	0	0	0	1.15223	0.671968	0.0597462	0.0597462	0.0597462	0.0597462	TUname63845	Genbank	chr3	+	135928231	136167196	630	intronic antisense	uc012cyj.1	Bank1	-	136053363	136326046
ENSMUST00000184493	3.26212	0.393335	2.0797	0.149272	0.830383	up	2	1	0	0	0	0	1.15223	0.671968	0.0597462	0.0597462	0.0597462	0.0597462	RP24-175I14.4	Ensembl	chr14	-	69546248	69555332	2174	bidirectional	NM_026174	Entpd4	+	69555400	69584992
ENSMUST00000133151	3.26212	0.393335	2.0797	0.149272	0.830383	up	2	1	0	0	0	0	1.15223	0.671968	0.0597462	0.0597462	0.0597462	0.0597462	Sh3rf3	Ensembl	chr10	+	58814058	59007193	496	exon sense-overlapping	NM_172788	Sh3rf3	+	58813358	59138916
ENSMUST00000123238	3.26212	0.393335	2.0797	0.149272	0.830383	up	2	1	0	0	0	0	1.15223	0.671968	0.0597462	0.0597462	0.0597462	0.0597462	Cfh	Ensembl	chr1	-	140085878	140183322	4300	exon sense-overlapping	ENSMUST00000066859	Cfh	-	140085854	140183411
ENSMUST00000177062	3.26212	0.393335	2.0797	0.149272	0.830383	up	2	1	0	0	0	0	1.15223	0.671968	0.0597462	0.0597462	0.0597462	0.0597462	Rhot2	Ensembl	chr17	-	25841255	25842054	500	exon sense-overlapping	ENSMUST00000176591	Rhot2	-	25841759	25844417
TCONS_00008181	3.26212	0.393335	2.0797	0.149272	0.830383	up	2	1	0	0	0	0	1.15223	0.671968	0.0597462	0.0597462	0.0597462	0.0597462	XLOC_006397	Alexander et al 2013	chr13	-	3497959	3519447	94	intergenic
ENSMUST00000179174	3.26212	0.393335	2.0797	0.149272	0.830383	up	2	1	0	0	0	0	1.15223	0.671968	0.0597462	0.0597462	0.0597462	0.0597462	Gm8532	Ensembl	chr1	-	131632505	131632874	369	intergenic
ENSMUST00000139110	3.26212	0.393335	2.0797	0.149272	0.830383	up	2	1	0	0	0	0	1.15223	0.671968	0.0597462	0.0597462	0.0597462	0.0597462	Ddx58	Ensembl	chr4	-	40226569	40228356	541	exon sense-overlapping	ENSMUST00000142055	Ddx58	-	40208852	40239700
ENSMUST00000139407	3.26212	0.393335	2.0797	0.149272	0.830383	up	2	1	0	0	0	0	1.15223	0.671968	0.0597462	0.0597462	0.0597462	0.0597462	Stk39	Ensembl	chr2	-	68211746	68251329	473	exon sense-overlapping	uc029txy.1	Stk39	-	68210446	68386688
ENSMUST00000119095	3.26212	0.393335	2.0797	0.149272	0.830383	up	2	1	0	0	0	0	1.15223	0.671968	0.0597462	0.0597462	0.0597462	0.0597462	Gm14016	Ensembl	chr2	+	118594078	118594564	486	intergenic
ENSMUST00000135717	3.26212	0.393335	2.0797	0.149272	0.830383	up	2	1	0	0	0	0	1.15223	0.671968	0.0597462	0.0597462	0.0597462	0.0597462	Pygb	Ensembl	chr2	+	150828387	150830634	531	exon sense-overlapping	NM_153781	Pygb	+	150786795	150831748
ENSMUST00000179326	3.26212	0.393335	2.0797	0.149272	0.830383	up	2	1	0	0	0	0	1.15223	0.671968	0.0597462	0.0597462	0.0597462	0.0597462	Gm5473	Ensembl	chr15	+	63631696	63632338	642	intergenic
ENSMUST00000128654	3.25885	1.69661	4.30498	0.0380031	0.830383	up	7	4	13	0	1	1	2.37108	1.69872	2.72528	0.0597462	0.621297	0.718048	8430419K02Rik	Ensembl	chr11	-	18845850	18872155	1870	intergenic
ENSMUST00000153675	3.25045	1.14122	2.52322	0.112183	0.830383	up	1	11	0	1	0	0	0.707016	2.8284	0.0597462	0.626355	0.0597462	0.0597462	Gm13572	Ensembl	chr2	+	60037140	60038837	559	intronic antisense	uc008jtt.1	Baz2b	-	59942761	60125810
AK080446	3.24808	1.20497	2.65412	0.103285	0.830383	up	0	0	15	1	0	0	0.0597462	0.0597462	2.90109	0.626355	0.0597462	0.0597462	TUname53680	Genbank	chr14	+	70241694	70242054	362	intronic antisense	uc011znz.1	Ppp3cc	-	70217897	70289449
ENSMUST00000140620	3.2412	1.21033	2.63241	0.104705	0.830383	up	4	2	8	0	0	1	1.76674	1.10044	2.16039	0.0597462	0.0597462	0.718048	Idua	Ensembl	chr5	+	108669105	108684552	3412	exon sense-overlapping	NM_008325	Idua	+	108669105	108684558
ENSMUST00000146779	3.24112	0.390937	2.06184	0.15103	0.830383	up	1	2	0	0	0	0	0.707016	1.10044	0.0597462	0.0597462	0.0597462	0.0597462	Gm16190	Ensembl	chr17	-	28855135	28859503	3946	natural antisense	ENSMUST00000114737	Pnpla1	+	28858410	28890308
ENSMUST00000173417	3.24112	0.390937	2.06184	0.15103	0.830383	up	1	2	0	0	0	0	0.707016	1.10044	0.0597462	0.0597462	0.0597462	0.0597462	Prr3	Ensembl	chr17	-	35978529	35979299	425	exon sense-overlapping	NM_001165892	Prr3	-	35977755	35979467
ENSMUST00000123615	3.24112	0.390937	2.06184	0.15103	0.830383	up	1	2	0	0	0	0	0.707016	1.10044	0.0597462	0.0597462	0.0597462	0.0597462	Plekhg5	Ensembl	chr4	+	152104499	152106193	384	exon sense-overlapping	ENSMUST00000118648	Plekhg5	+	152086857	152115390
ENSMUST00000168355	3.24112	0.390937	2.06184	0.15103	0.830383	up	1	2	0	0	0	0	0.707016	1.10044	0.0597462	0.0597462	0.0597462	0.0597462	Dok2	Ensembl	chr14	+	70776362	70777561	355	exon sense-overlapping	NM_010071	Dok2	+	70774380	70778494
ENSMUST00000160306	3.24112	0.390937	2.06184	0.15103	0.830383	up	1	2	0	0	0	0	0.707016	1.10044	0.0597462	0.0597462	0.0597462	0.0597462	Gm16146	Ensembl	chr18	-	84858635	84859547	439	intronic antisense	ENSMUST00000163083	Cyb5	+	84851878	84879862
AK089675	3.23699	1.67602	4.17406	0.0410495	0.830383	up	5	9	9	0	1	1	1.99747	2.58519	2.29245	0.0597462	0.621297	0.718048	TUname35510	Genbank	chr12	+	80885548	80887674	1733	intergenic
TCONS_00036192	3.23017	1.17883	2.57586	0.108508	0.830383	up	1	2	11	1	0	0	0.707016	1.10044	2.52504	0.626355	0.0597462	0.0597462	XLOC_027114	Alexander et al 2013	chrX	-	70365575	70374927	681	intergenic
uc008eau.2	3.22499	2.56806	9.79108	0.00175401	0.44861	up	8	24	20	0	3	2	2.52693	3.83445	3.26491	0.0597462	1.33926	1.1684	Esco1	UCSC_knowngene	chr18	-	10566511	10610352	4662	exon sense-overlapping	NM_001081222	Esco1	-	10566511	10610352
ENSMUST00000154430	3.22491	1.13177	2.47164	0.115919	0.830383	up	0	11	1	0	1	0	0.0597462	2.8284	0.556593	0.0597462	0.621297	0.0597462	Rpain	Ensembl	chr11	+	70970226	70971919	759	exon sense-overlapping	NM_027186	Rpain	+	70970199	70977933
AK076377	3.22012	1.13208	2.46507	0.116405	0.830383	up	0	11	1	1	0	0	0.0597462	2.8284	0.556593	0.626355	0.0597462	0.0597462	TUname52243	Genbank	chr5	-	43039740	43044060	2296	intergenic
ENSMUST00000172631	3.21999	0.38854	2.04404	0.152806	0.830383	up	0	3	0	0	0	0	0.0597462	1.43038	0.0597462	0.0597462	0.0597462	0.0597462	Pear1	Ensembl	chr3	-	87749097	87762214	4539	exon sense-overlapping	NM_001032414	Pear1	-	87749096	87768953
ENSMUST00000127150	3.21999	0.38854	2.04404	0.152806	0.830383	up	0	3	0	0	0	0	0.0597462	1.43038	0.0597462	0.0597462	0.0597462	0.0597462	Gm13476	Ensembl	chr2	+	45111137	45114087	1305	natural antisense	ENSMUST00000076836	Zeb2	-	44988441	45112890
ENSMUST00000185174	3.21999	0.38854	2.04404	0.152806	0.830383	up	0	3	0	0	0	0	0.0597462	1.43038	0.0597462	0.0597462	0.0597462	0.0597462	Gm21685	Ensembl	chr14	+	69555465	69565814	418	exon sense-overlapping	NM_026174	Entpd4	+	69555400	69584992
ENSMUST00000132364	3.21999	0.38854	2.04404	0.152806	0.830383	up	0	3	0	0	0	0	0.0597462	1.43038	0.0597462	0.0597462	0.0597462	0.0597462	Vdac2	Ensembl	chr14	+	21837733	21840543	663	exon sense-overlapping	ENSMUST00000153320	Vdac2	+	21831270	21840435
ENSMUST00000128611	3.21999	0.38854	2.04404	0.152806	0.830383	up	0	3	0	0	0	0	0.0597462	1.43038	0.0597462	0.0597462	0.0597462	0.0597462	Slc25a25	Ensembl	chr2	-	32417091	32420450	734	exon sense-overlapping	NM_001164357	Slc25a25	-	32414486	32451470
ENSMUST00000128979	3.21999	0.38854	2.04404	0.152806	0.830383	up	0	3	0	0	0	0	0.0597462	1.43038	0.0597462	0.0597462	0.0597462	0.0597462	Dhx30	Ensembl	chr9	-	110084320	110109995	4574	exon sense-overlapping	ENSMUST00000035056	Dhx30	-	110084319	110117422
ENSMUST00000182925	3.21999	0.38854	2.04404	0.152806	0.830383	up	0	3	0	0	0	0	0.0597462	1.43038	0.0597462	0.0597462	0.0597462	0.0597462	Anapc16	Ensembl	chr10	-	59988403	59990383	460	exon sense-overlapping	ENSMUST00000182152	Anapc16	-	59988585	60002769
uc008dhh.2	3.21999	0.38854	2.04404	0.152806	0.830383	up	0	3	0	0	0	0	0.0597462	1.43038	0.0597462	0.0597462	0.0597462	0.0597462	DQ711310	UCSC_knowngene	chr17	-	66154041	66154068	27	intergenic
ENSMUST00000171076	3.21999	0.38854	2.04404	0.152806	0.830383	up	0	3	0	0	0	0	0.0597462	1.43038	0.0597462	0.0597462	0.0597462	0.0597462	Inpp4b	Ensembl	chr8	+	81770732	81884221	412	exon sense-overlapping	ENSMUST00000170160	Inpp4b	+	81773112	82069002
ENSMUST00000141501	3.21999	0.38854	2.04404	0.152806	0.830383	up	0	3	0	0	0	0	0.0597462	1.43038	0.0597462	0.0597462	0.0597462	0.0597462	Uqcc1	Ensembl	chr2	-	155858007	155930050	757	exon sense-overlapping	ENSMUST00000159238	Uqcc1	-	155887106	155930060
ENSMUST00000126372	3.21999	0.38854	2.04404	0.152806	0.830383	up	0	3	0	0	0	0	0.0597462	1.43038	0.0597462	0.0597462	0.0597462	0.0597462	Thbs3	Ensembl	chr3	+	89225176	89226563	426	exon sense-overlapping	ENSMUST00000119084	Thbs3	+	89215232	89226804
uc009qks.1	3.21999	0.38854	2.04404	0.152806	0.830383	up	0	3	0	0	0	0	0.0597462	1.43038	0.0597462	0.0597462	0.0597462	0.0597462	DQ685325	UCSC_knowngene	chr9	-	67733607	67733637	30	intergenic
ENSMUST00000125005	3.21999	0.38854	2.04404	0.152806	0.830383	up	0	3	0	0	0	0	0.0597462	1.43038	0.0597462	0.0597462	0.0597462	0.0597462	Rpl7	Ensembl	chr1	-	16102490	16104384	784	exon sense-overlapping	ENSMUST00000149566	Rpl7	-	16101779	16104227
ENSMUST00000177482	3.21999	0.38854	2.04404	0.152806	0.830383	up	0	3	0	0	0	0	0.0597462	1.43038	0.0597462	0.0597462	0.0597462	0.0597462	Gm20618	Ensembl	chr6	-	6603711	6684806	734	intergenic
ENSMUST00000135851	3.21999	0.38854	2.04404	0.152806	0.830383	up	0	3	0	0	0	0	0.0597462	1.43038	0.0597462	0.0597462	0.0597462	0.0597462	Rgs14	Ensembl	chr13	+	55379168	55384686	1846	exon sense-overlapping	uc007qqr.1	Rgs14	+	55379168	55384687
ENSMUST00000160071	3.21999	0.38854	2.04404	0.152806	0.830383	up	0	3	0	0	0	0	0.0597462	1.43038	0.0597462	0.0597462	0.0597462	0.0597462	Auts2	Ensembl	chr5	-	131439079	132050337	3571	exon sense-overlapping	ENSMUST00000161804	Auts2	-	131437787	131616605
ENSMUST00000126940	3.21999	0.38854	2.04404	0.152806	0.830383	up	0	3	0	0	0	0	0.0597462	1.43038	0.0597462	0.0597462	0.0597462	0.0597462	BC025920	Ensembl	chr10	+	81606269	81620703	345	intron sense-overlapping	ENSMUST00000099442	BC025920	+	81607024	81609809
ENSMUST00000183312	3.21999	0.38854	2.04404	0.152806	0.830383	up	0	3	0	0	0	0	0.0597462	1.43038	0.0597462	0.0597462	0.0597462	0.0597462	Cul9	Ensembl	chr17	-	46500571	46501071	500	exon sense-overlapping	ENSMUST00000066026	Cul9	-	46500604	46546388
uc012ekv.1	3.21999	0.38854	2.04404	0.152806	0.830383	up	0	3	0	0	0	0	0.0597462	1.43038	0.0597462	0.0597462	0.0597462	0.0597462	Gstk1	UCSC_knowngene	chr6	+	42245934	42250441	1007	exon sense-overlapping	NM_029555	Gstk1	+	42245934	42250441
ENSMUST00000130543	3.21999	0.38854	2.04404	0.152806	0.830383	up	0	3	0	0	0	0	0.0597462	1.43038	0.0597462	0.0597462	0.0597462	0.0597462	Relb	Ensembl	chr7	-	19616374	19628784	784	exon sense-overlapping	NM_009046	Relb	-	19606221	19629438
ENSMUST00000133521	3.21999	0.38854	2.04404	0.152806	0.830383	up	0	3	0	0	0	0	0.0597462	1.43038	0.0597462	0.0597462	0.0597462	0.0597462	Rgs20	Ensembl	chr1	-	5062778	5070273	670	exon sense-overlapping	ENSMUST00000147158	Rgs20	-	4912341	5070282
ENSMUST00000144532	3.21999	0.38854	2.04404	0.152806	0.830383	up	0	3	0	0	0	0	0.0597462	1.43038	0.0597462	0.0597462	0.0597462	0.0597462	Zbtb32	Ensembl	chr7	-	30597931	30598909	582	exon sense-overlapping	ENSMUST00000108150	Zbtb32	-	30589682	30598869
ENSMUST00000135865	3.21999	0.38854	2.04404	0.152806	0.830383	up	0	3	0	0	0	0	0.0597462	1.43038	0.0597462	0.0597462	0.0597462	0.0597462	4930544D05Rik	Ensembl	chr11	+	70615896	70616890	628	exon sense-overlapping	ENSMUST00000180052	4930544D05Rik	+	70615847	70616875
ENSMUST00000120842	3.21999	0.38854	2.04404	0.152806	0.830383	up	0	3	0	0	0	0	0.0597462	1.43038	0.0597462	0.0597462	0.0597462	0.0597462	Gm8152	Ensembl	chr5	-	107381380	107382017	637	intronic antisense	NM_054054	Brdt	+	107331193	107387058
ENSMUST00000140915	3.21999	0.38854	2.04404	0.152806	0.830383	up	0	3	0	0	0	0	0.0597462	1.43038	0.0597462	0.0597462	0.0597462	0.0597462	Cdcp1	Ensembl	chr9	-	123180762	123215999	2738	exon sense-overlapping	NM_133974	Cdcp1	-	123172284	123216038
CF897302	3.21999	0.38854	2.04404	0.152806	0.830383	up	0	3	0	0	0	0	0.0597462	1.43038	0.0597462	0.0597462	0.0597462	0.0597462	TUname63914	Genbank	chr16	-	25523694	25524193	499	intergenic
uc029ssj.1	3.21999	0.38854	2.04404	0.152806	0.830383	up	0	3	0	0	0	0	0.0597462	1.43038	0.0597462	0.0597462	0.0597462	0.0597462	AK181773	UCSC_knowngene	chr15	+	76345702	76345937	235	exon sense-overlapping	NM_025567	Cyc1	+	76343522	76345934
ENSMUST00000137177	3.21999	0.38854	2.04404	0.152806	0.830383	up	0	3	0	0	0	0	0.0597462	1.43038	0.0597462	0.0597462	0.0597462	0.0597462	Pcsk4	Ensembl	chr10	-	80321282	80329453	2772	exon sense-overlapping	NM_008793	Pcsk4	-	80321282	80329473
ENSMUST00000120433	3.21999	0.38854	2.04404	0.152806	0.830383	up	0	3	0	0	0	0	0.0597462	1.43038	0.0597462	0.0597462	0.0597462	0.0597462	Gm11793	Ensembl	chr11	-	121106146	121107127	981	intergenic
TCONS_00025169	3.21999	0.38854	2.04404	0.152806	0.830383	up	0	3	0	0	0	0	0.0597462	1.43038	0.0597462	0.0597462	0.0597462	0.0597462	XLOC_018870	Alexander et al 2013	chr5	+	147418693	147422666	2045	intergenic
ENSMUST00000147230	3.21999	0.38854	2.04404	0.152806	0.830383	up	0	3	0	0	0	0	0.0597462	1.43038	0.0597462	0.0597462	0.0597462	0.0597462	B430219N15Rik	Ensembl	chr10	+	7780267	7781357	835	natural antisense	ENSMUST00000124838	Ginm1	-	7767955	7780891
ENSMUST00000152494	3.21999	0.38854	2.04404	0.152806	0.830383	up	0	3	0	0	0	0	0.0597462	1.43038	0.0597462	0.0597462	0.0597462	0.0597462	9430093N23Rik	Ensembl	chr2	+	169234990	169237770	515	intergenic
ENSMUST00000120092	3.21999	0.38854	2.04404	0.152806	0.830383	up	0	3	0	0	0	0	0.0597462	1.43038	0.0597462	0.0597462	0.0597462	0.0597462	Gm6806	Ensembl	chrX	+	68503125	68504131	1006	intergenic
ENSMUST00000127802	3.21999	0.38854	2.04404	0.152806	0.830383	up	0	3	0	0	0	0	0.0597462	1.43038	0.0597462	0.0597462	0.0597462	0.0597462	Cep128	Ensembl	chr12	-	91289392	91384409	1750	exon sense-overlapping	NM_181815	Cep128	-	90998491	91384409
uc029xdl.1	3.21999	0.38854	2.04404	0.152806	0.830383	up	0	3	0	0	0	0	0.0597462	1.43038	0.0597462	0.0597462	0.0597462	0.0597462	DQ691529	UCSC_knowngene	chr9	-	67733400	67733430	30	intergenic
uc008ffj.1	3.21999	0.38854	2.04404	0.152806	0.830383	up	0	3	0	0	0	0	0.0597462	1.43038	0.0597462	0.0597462	0.0597462	0.0597462	BC053977	UCSC_knowngene	chr18	-	65863339	65894755	687	intronic antisense	ENSMUST00000173985	Grp	+	65872819	65886595
AK005768	3.21999	0.38854	2.04404	0.152806	0.830383	up	0	3	0	0	0	0	0.0597462	1.43038	0.0597462	0.0597462	0.0597462	0.0597462	TUname2844	Genbank	chr6	-	83761758	83762508	347	bidirectional	NM_029245	Ankrd53	+	83762645	83768326
uc009qih.1	3.21999	0.38854	2.04404	0.152806	0.830383	up	0	3	0	0	0	0	0.0597462	1.43038	0.0597462	0.0597462	0.0597462	0.0597462	DQ723160	UCSC_knowngene	chr9	-	67715916	67715975	59	intergenic
ENSMUST00000145702	3.21999	0.38854	2.04404	0.152806	0.830383	up	0	3	0	0	0	0	0.0597462	1.43038	0.0597462	0.0597462	0.0597462	0.0597462	Ccdc137	Ensembl	chr11	+	120459800	120462532	1074	exon sense-overlapping	NM_152807	Ccdc137	+	120458128	120464353
ENSMUST00000117498	3.21999	0.38854	2.04404	0.152806	0.830383	up	0	3	0	0	0	0	0.0597462	1.43038	0.0597462	0.0597462	0.0597462	0.0597462	Gm15770	Ensembl	chr5	-	142852615	142853199	584	intergenic
AK046687	3.21999	0.38854	2.04404	0.152806	0.830383	up	0	3	0	0	0	0	0.0597462	1.43038	0.0597462	0.0597462	0.0597462	0.0597462	TUname52656	Genbank	chr16	-	95169837	95171510	1673	intergenic
uc029tpy.1	3.21999	0.38854	2.04404	0.152806	0.830383	up	0	3	0	0	0	0	0.0597462	1.43038	0.0597462	0.0597462	0.0597462	0.0597462	AB351889	UCSC_knowngene	chr18	-	72946424	72946448	24	intergenic
2_00002911	3.21999	0.38854	2.04404	0.152806	0.830383	up	0	3	0	0	0	0	0.0597462	1.43038	0.0597462	0.0597462	0.0597462	0.0597462	XLOC_001695	Lei Sun et al 2012	chr10	-	15750860	15760046	325	intergenic
AK156306	3.21999	0.38854	2.04404	0.152806	0.830383	up	0	3	0	0	0	0	0.0597462	1.43038	0.0597462	0.0597462	0.0597462	0.0597462	TUname51290	Genbank	chr3	-	151092133	151096767	4621	intergenic
TCONS_00016005	3.21999	0.38854	2.04404	0.152806	0.830383	up	0	3	0	0	0	0	0.0597462	1.43038	0.0597462	0.0597462	0.0597462	0.0597462	XLOC_011874	Alexander et al 2013	chr19	+	20492747	20493527	207	intergenic
NR_000040	3.21999	0.38854	2.04404	0.152806	0.830383	up	0	3	0	0	0	0	0.0597462	1.43038	0.0597462	0.0597462	0.0597462	0.0597462	Tyms-ps	RefSeq	chr10	+	87966670	87968017	1347	intergenic
uc008pcf.1	3.21999	0.38854	2.04404	0.152806	0.830383	up	0	3	0	0	0	0	0.0597462	1.43038	0.0597462	0.0597462	0.0597462	0.0597462	AY512943	UCSC_knowngene	chr3	-	41286061	41290590	2741	intergenic
uc009pne.1	3.21999	0.38854	2.04404	0.152806	0.830383	up	0	3	0	0	0	0	0.0597462	1.43038	0.0597462	0.0597462	0.0597462	0.0597462	DQ544250	UCSC_knowngene	chr9	-	54215235	54215282	47	intergenic
ENSMUST00000156395	3.21962	1.64612	4.01736	0.0450363	0.830383	up	5	16	0	1	0	1	1.99747	3.30125	0.0597462	0.626355	0.0597462	0.718048	Gm12575	Ensembl	chr11	-	82924902	82933382	1306	natural antisense	ENSMUST00000164945	Unc45b	+	82911252	82943403
uc008fws.1	3.21293	1.66729	4.0871	0.0432137	0.830383	up	3	10	10	1	0	1	1.49196	2.71192	2.41342	0.626355	0.0597462	0.718048	AK144662	UCSC_knowngene	chr19	-	3689686	3708168	562	bidirectional	NM_028077	1810055G02Rik	+	3708332	3717881
TCONS_00020735	3.2122	1.12591	2.44269	0.118076	0.830383	up	8	0	4	0	1	0	2.52693	0.0597462	1.46274	0.0597462	0.621297	0.0597462	XLOC_015095	Alexander et al 2013	chr3	+	35323777	35325266	1266	intergenic
ENSMUST00000138794	3.20924	1.12752	2.44138	0.118175	0.830383	up	5	4	3	1	0	0	1.99747	1.69872	1.21897	0.626355	0.0597462	0.0597462	Ccdc101	Ensembl	chr7	+	126663792	126664988	285	exon sense-overlapping	NM_029339	Ccdc101	+	126649308	126672779
AK076819	3.20501	1.10101	2.38023	0.122882	0.830383	up	11	0	0	1	0	0	2.91339	0.0597462	0.0597462	0.626355	0.0597462	0.0597462	TUname58159	Genbank	chr11	-	94620438	94621936	1498	intergenic
uc029typ.1	3.18971	0.3842	2.01682	0.155567	0.830383	up	2	0	1	0	0	0	1.15223	0.0597462	0.556593	0.0597462	0.0597462	0.0597462	Cerkl	UCSC_knowngene	chr2	-	79332490	79428988	1976	exon sense-overlapping	uc029tzg.1	Cerkl	-	79332490	79456636
ENSMUST00000144308	3.18971	0.3842	2.01682	0.155567	0.830383	up	2	0	1	0	0	0	1.15223	0.0597462	0.556593	0.0597462	0.0597462	0.0597462	Zfp384	Ensembl	chr6	+	125009275	125031904	1864	exon sense-overlapping	NM_001252083	Zfp384	+	125009237	125037870
ENSMUST00000129275	3.18971	0.3842	2.01682	0.155567	0.830383	up	2	0	1	0	0	0	1.15223	0.0597462	0.556593	0.0597462	0.0597462	0.0597462	1700094C10Rik	Ensembl	chr5	+	74014215	74029680	507	natural antisense	ENSMUST00000145016	Usp46	-	74029315	74065744
AK156198	3.18971	0.3842	2.01682	0.155567	0.830383	up	2	0	1	0	0	0	1.15223	0.0597462	0.556593	0.0597462	0.0597462	0.0597462	TUname2860	Genbank	chr4	-	104340848	104344463	3615	intronic antisense	ENSMUST00000106827	Dab1	+	103619664	104680382
AK041689	3.18971	0.3842	2.01682	0.155567	0.830383	up	2	0	1	0	0	0	1.15223	0.0597462	0.556593	0.0597462	0.0597462	0.0597462	TUname57965	Genbank	chr12	+	99393115	99394074	960	natural antisense	ENSMUST00000046859	Foxn3	-	99194979	99393797
ENSMUST00000175792	3.18971	0.3842	2.01682	0.155567	0.830383	up	2	0	1	0	0	0	1.15223	0.0597462	0.556593	0.0597462	0.0597462	0.0597462	2410076I21Rik	Ensembl	chr9	-	58652855	58659292	510	natural antisense	ENSMUST00000176557	Nptn	+	58582405	58652878
ENSMUST00000182652	3.18971	0.3842	2.01682	0.155567	0.830383	up	2	0	1	0	0	0	1.15223	0.0597462	0.556593	0.0597462	0.0597462	0.0597462	Gm5946	Ensembl	chrX	-	150220715	150226021	2724	intergenic
ENSMUST00000134562	3.18971	0.3842	2.01682	0.155567	0.830383	up	2	0	1	0	0	0	1.15223	0.0597462	0.556593	0.0597462	0.0597462	0.0597462	Shisa6	Ensembl	chr11	-	66375132	66502814	285	exon sense-overlapping	NM_001034874	Shisa6	-	66211724	66526126
ENSMUST00000131805	3.18971	0.3842	2.01682	0.155567	0.830383	up	2	0	1	0	0	0	1.15223	0.0597462	0.556593	0.0597462	0.0597462	0.0597462	Usp5	Ensembl	chr6	-	124815419	124818637	1112	exon sense-overlapping	ENSMUST00000122110	Usp5	-	124815037	124829435
ENSMUST00000169421	3.18971	0.3842	2.01682	0.155567	0.830383	up	2	0	1	0	0	0	1.15223	0.0597462	0.556593	0.0597462	0.0597462	0.0597462	Tmprss7	Ensembl	chr16	-	45656340	45689615	2307	exon sense-overlapping	NM_172455	Tmprss7	-	45656316	45693658
ENSMUST00000002874	3.18971	0.3842	2.01682	0.155567	0.830383	up	2	0	1	0	0	0	1.15223	0.0597462	0.556593	0.0597462	0.0597462	0.0597462	Ggct	Ensembl	chr6	-	54985647	54992707	686	exon sense-overlapping	NM_026637	Ggct	-	54985094	54992867
ENSMUST00000137886	3.18441	1.14118	2.43972	0.1183	0.830383	up	4	0	9	0	1	0	1.76674	0.0597462	2.29245	0.0597462	0.621297	0.0597462	Gm14271	Ensembl	chr2	+	172046525	172050134	630	intergenic
ENSMUST00000124469	3.18397	2.01633	5.66881	0.0172707	0.830383	up	10	13	8	0	1	2	2.79571	3.03647	2.16039	0.0597462	0.621297	1.1684	A330050B17Rik	Ensembl	chr3	+	36000434	36025106	3353	natural antisense	NM_023644	Mccc1	-	35959305	36000678
AK157039	3.17966	1.14148	2.43316	0.118796	0.830383	up	4	0	9	1	0	0	1.76674	0.0597462	2.29245	0.626355	0.0597462	0.0597462	TUname5909	Genbank	chr14	+	55127316	55128391	1076	intergenic
ENSMUST00000140973	3.17745	1.11739	2.3818	0.122758	0.830383	up	0	9	3	0	1	0	0.0597462	2.58519	1.21897	0.0597462	0.621297	0.0597462	Brpf3	Ensembl	chr17	+	28823673	28838541	2597	exon sense-overlapping	NM_001081315	Brpf3	+	28801125	28838789
ENSMUST00000127561	3.16883	1.1151	2.36483	0.1241	0.830383	up	6	1	5	1	0	0	2.19633	0.671968	1.67121	0.626355	0.0597462	0.0597462	Gm15878	Ensembl	chr8	+	45949611	45949917	306	intergenic
ENSMUST00000125915	3.16825	0.381807	1.99909	0.157396	0.830383	up	1	1	1	0	0	0	0.707016	0.671968	0.556593	0.0597462	0.0597462	0.0597462	Bid	Ensembl	chr6	-	120906997	120916803	458	exon sense-overlapping	ENSMUST00000145948	Bid	-	120900221	120916798
ENSMUST00000135408	3.16825	0.381807	1.99909	0.157396	0.830383	up	1	1	1	0	0	0	0.707016	0.671968	0.556593	0.0597462	0.0597462	0.0597462	Bmp4	Ensembl	chr14	-	46386995	46390535	517	exon sense-overlapping	ENSMUST00000100676	Bmp4	-	46383706	46390550
ENSMUST00000131921	3.16825	0.381807	1.99909	0.157396	0.830383	up	1	1	1	0	0	0	0.707016	0.671968	0.556593	0.0597462	0.0597462	0.0597462	Utp6	Ensembl	chr11	-	79935849	79942264	648	exon sense-overlapping	NM_144826	Utp6	-	79933955	79962387
ENSMUST00000181270	3.16825	0.381807	1.99909	0.157396	0.830383	up	1	1	1	0	0	0	0.707016	0.671968	0.556593	0.0597462	0.0597462	0.0597462	Gm26730	Ensembl	chr11	+	116306863	116309510	1338	natural antisense	ENSMUST00000124281	Exoc7	-	116305030	116307233
ENSMUST00000145528	3.16825	0.381807	1.99909	0.157396	0.830383	up	1	1	1	0	0	0	0.707016	0.671968	0.556593	0.0597462	0.0597462	0.0597462	Tap2	Ensembl	chr17	+	34207705	34209220	344	exon sense-overlapping	NM_011530	Tap2	+	34204478	34216321
ENSMUST00000134121	3.16825	0.381807	1.99909	0.157396	0.830383	up	1	1	1	0	0	0	0.707016	0.671968	0.556593	0.0597462	0.0597462	0.0597462	Ddc	Ensembl	chr11	-	11875275	11890398	701	exon sense-overlapping	NM_001190448	Ddc	-	11814100	11898144
AK013589	3.16825	0.381807	1.99909	0.157396	0.830383	up	1	1	1	0	0	0	0.707016	0.671968	0.556593	0.0597462	0.0597462	0.0597462	TUname59915	Genbank	chr14	+	61448487	61450137	1650	intergenic
ENSMUST00000147061	3.16825	0.381807	1.99909	0.157396	0.830383	up	1	1	1	0	0	0	0.707016	0.671968	0.556593	0.0597462	0.0597462	0.0597462	Srek1ip1	Ensembl	chr13	+	104834045	104839271	2182	exon sense-overlapping	NM_026075	Srek1ip1	+	104817238	104838659
AK153802	3.16825	0.381807	1.99909	0.157396	0.830383	up	1	1	1	0	0	0	0.707016	0.671968	0.556593	0.0597462	0.0597462	0.0597462	TUname57824	Genbank	chr10	-	82851254	82852647	1393	intronic antisense	NM_001042523	Txnrd1	+	82833950	82897724
ENSMUST00000145954	3.16411	1.64678	3.90555	0.048129	0.830383	up	1	9	13	1	0	1	0.707016	2.58519	2.72528	0.626355	0.0597462	0.718048	Lrrk1	Ensembl	chr7	-	66259183	66282217	3374	exon sense-overlapping	NM_146191	Lrrk1	-	66258746	66388341
ENSMUST00000120525	3.15319	1.1102	2.33694	0.12634	0.830383	up	0	8	4	0	1	0	0.0597462	2.44625	1.46274	0.0597462	0.621297	0.0597462	Gm11622	Ensembl	chr11	+	105031156	105031847	691	intergenic
AK006954	3.14668	0.379414	1.98142	0.159244	0.830383	up	0	2	1	0	0	0	0.0597462	1.10044	0.556593	0.0597462	0.0597462	0.0597462	TUname9156	Genbank	chr6	+	118846044	118852979	920	intronic antisense	NM_001159535	Cacna1c	-	118592295	119108189
ENSMUST00000160291	3.14668	0.379414	1.98142	0.159244	0.830383	up	0	2	1	0	0	0	0.0597462	1.10044	0.556593	0.0597462	0.0597462	0.0597462	Pip5k1c	Ensembl	chr10	+	81292987	81309130	922	exon sense-overlapping	NM_001146687	Pip5k1c	+	81292971	81319974
ENSMUST00000173496	3.14668	0.379414	1.98142	0.159244	0.830383	up	0	2	1	0	0	0	0.0597462	1.10044	0.556593	0.0597462	0.0597462	0.0597462	Col26a1	Ensembl	chr5	-	136765340	136882743	426	exon sense-overlapping	uc009abb.1	Emid2	-	136757488	136883107
ENSMUST00000143446	3.14668	0.379414	1.98142	0.159244	0.830383	up	0	2	1	0	0	0	0.0597462	1.10044	0.556593	0.0597462	0.0597462	0.0597462	Mfsd2b	Ensembl	chr12	-	4863564	4874359	2893	exon sense-overlapping	uc011yjy.1	Mfsd2b	-	4865136	4874359
ENSMUST00000144823	3.14668	0.379414	1.98142	0.159244	0.830383	up	0	2	1	0	0	0	0.0597462	1.10044	0.556593	0.0597462	0.0597462	0.0597462	Wdsub1	Ensembl	chr2	-	59861323	59862726	524	exon sense-overlapping	NM_028118	Wdsub1	-	59852364	59882606
2_00015044	3.14668	0.379414	1.98142	0.159244	0.830383	up	0	2	1	0	0	0	0.0597462	1.10044	0.556593	0.0597462	0.0597462	0.0597462	XLOC_010999	Lei Sun et al 2012	chr19	+	42185486	42194736	3851	exon sense-overlapping	NM_001164531	Zfyve27	+	42170566	42194592
BC052948	3.14668	0.379414	1.98142	0.159244	0.830383	up	0	2	1	0	0	0	0.0597462	1.10044	0.556593	0.0597462	0.0597462	0.0597462	TUname1522	Genbank	chr6	+	127125767	127126295	780	natural antisense	NM_009829	Ccnd2	-	127125708	127151048
ENSMUST00000136934	3.14668	0.379414	1.98142	0.159244	0.830383	up	0	2	1	0	0	0	0.0597462	1.10044	0.556593	0.0597462	0.0597462	0.0597462	Amotl2	Ensembl	chr9	+	102730730	102732327	919	exon sense-overlapping	ENSMUST00000153965	Amotl2	+	102716801	102733413
ENSMUST00000143391	3.14668	0.379414	1.98142	0.159244	0.830383	up	0	2	1	0	0	0	0.0597462	1.10044	0.556593	0.0597462	0.0597462	0.0597462	Gm12714	Ensembl	chr11	+	59898373	59907319	669	intergenic
AK156839	3.14668	0.379414	1.98142	0.159244	0.830383	up	0	2	1	0	0	0	0.0597462	1.10044	0.556593	0.0597462	0.0597462	0.0597462	TUname32307	Genbank	chr1	+	137252141	137254057	1922	intergenic
TCONS_00013497	3.14668	0.379414	1.98142	0.159244	0.830383	up	0	2	1	0	0	0	0.0597462	1.10044	0.556593	0.0597462	0.0597462	0.0597462	XLOC_010505	Alexander et al 2013	chr17	-	22710466	22721066	8472	intergenic
ENSMUST00000118655	3.14668	0.379414	1.98142	0.159244	0.830383	up	0	2	1	0	0	0	0.0597462	1.10044	0.556593	0.0597462	0.0597462	0.0597462	Gm12182	Ensembl	chr11	-	48734553	48735561	1008	intergenic
uc029vpo.1	3.14668	0.379414	1.98142	0.159244	0.830383	up	0	2	1	0	0	0	0.0597462	1.10044	0.556593	0.0597462	0.0597462	0.0597462	AB346804	UCSC_knowngene	chr5	+	137720171	137720267	96	intergenic
AK090173	3.14668	0.379414	1.98142	0.159244	0.830383	up	0	2	1	0	0	0	0.0597462	1.10044	0.556593	0.0597462	0.0597462	0.0597462	TUname55537	Genbank	chr11	-	35536805	35539518	2715	intronic antisense	NM_011412	Slit3	+	35121455	35708507
ENSMUST00000142895	3.14668	0.379414	1.98142	0.159244	0.830383	up	0	2	1	0	0	0	0.0597462	1.10044	0.556593	0.0597462	0.0597462	0.0597462	1110028F11Rik	Ensembl	chr11	+	87702122	87704989	383	intron sense-overlapping	ENSMUST00000040089	Rnf43	+	87699896	87735539
ENSMUST00000118511	3.14668	0.379414	1.98142	0.159244	0.830383	up	0	2	1	0	0	0	0.0597462	1.10044	0.556593	0.0597462	0.0597462	0.0597462	Gm11977	Ensembl	chr11	-	6781677	6783138	1461	intergenic
TCONS_00017665	3.14668	0.379414	1.98142	0.159244	0.830383	up	0	2	1	0	0	0	0.0597462	1.10044	0.556593	0.0597462	0.0597462	0.0597462	XLOC_013955	Alexander et al 2013	chr2	-	29088370	29090246	1839	intergenic
ENSMUST00000081336	3.14668	0.379414	1.98142	0.159244	0.830383	up	0	2	1	0	0	0	0.0597462	1.10044	0.556593	0.0597462	0.0597462	0.0597462	Gm6065	Ensembl	chr7	+	17792573	17793065	492	intergenic
uc007qeb.1	3.14668	0.379414	1.98142	0.159244	0.830383	up	0	2	1	0	0	0	0.0597462	1.10044	0.556593	0.0597462	0.0597462	0.0597462	AK029768	UCSC_knowngene	chr13	-	39771790	39791384	453	intergenic
uc012enj.1	3.14085	2.24422	6.97704	0.00825725	0.828203	up	6	24	8	1	2	1	2.19633	3.83445	2.16039	0.626355	1.02449	0.718048	BC054353	UCSC_knowngene	chr6	-	72347028	72348458	963	natural antisense	NM_026696	0610030E20Rik	+	72347316	72353160
ENSMUST00000133111	3.13875	1.07999	2.25715	0.133001	0.830383	up	8	1	2	0	1	0	2.52693	0.671968	0.925468	0.0597462	0.621297	0.0597462	Phldb2	Ensembl	chr16	-	45777712	45789229	598	exon sense-overlapping	ENSMUST00000142697	Phldb2	-	45780334	45791447
CK428346	3.13144	1.15563	2.37911	0.12297	0.830383	up	5	0	8	0	0	1	1.99747	0.0597462	2.16039	0.0597462	0.0597462	0.718048	TUname64005	Genbank	chr15	+	97398004	97398262	270	intergenic
ENSMUST00000136906	3.13059	1.12641	2.34258	0.125883	0.830383	up	0	3	10	0	1	0	0.0597462	1.43038	2.41342	0.0597462	0.621297	0.0597462	1700016G14Rik	Ensembl	chr13	+	24741231	24746592	863	intergenic
AK043643	3.1303	1.56872	3.56758	0.0589205	0.830383	up	12	1	7	2	0	0	3.02219	0.671968	2.01501	1.03213	0.0597462	0.0597462	TUname42538	Genbank	chrX	-	86708005	86710867	2863	intergenic
ENSMUST00000129566	3.12886	1.59464	3.65973	0.055745	0.830383	up	1	7	14	1	1	0	0.707016	2.29249	2.81586	0.626355	0.621297	0.0597462	4933408B17Rik	Ensembl	chr18	-	34579944	34597345	2212	exon sense-overlapping	NM_177773	4933408B17Rik	-	34579845	34597468
ENSMUST00000146654	3.12808	1.07965	2.24283	0.134237	0.830383	up	4	6	1	1	0	0	1.76674	2.12037	0.556593	0.626355	0.0597462	0.0597462	Gm16348	Ensembl	chr8	+	41218138	41220894	2385	intergenic
ENSMUST00000161024	3.1158	1.10437	2.25717	0.132999	0.830383	up	10	1	0	0	0	1	2.79571	0.671968	0.0597462	0.0597462	0.0597462	0.718048	Gm15890	Ensembl	chr8	-	94379236	94386972	717	intronic antisense	ENSMUST00000034220	Herpud1	+	94386494	94395358
AK133430	3.11129	1.09778	2.26075	0.132692	0.830383	up	1	5	6	0	1	0	0.707016	1.9249	1.85333	0.0597462	0.621297	0.0597462	TUname18080	Genbank	chr15	+	73645873	73647602	1732	bidirectional	ENSMUST00000130765	Slc45a4	-	73605592	73645762
AK016278	3.11091	1.59758	3.61497	0.057264	0.830383	up	8	4	9	0	1	1	2.52693	1.69872	2.29245	0.0597462	0.621297	0.718048	TUname55138	Genbank	chr14	+	48560813	48563276	841	intergenic
ENSMUST00000180691	3.10105	1.11966	2.29163	0.130076	0.830383	up	0	2	11	1	0	0	0.0597462	1.10044	2.52504	0.626355	0.0597462	0.0597462	Gm26852	Ensembl	chr7	-	19382219	19392718	5751	natural antisense	ENSMUST00000108461	Ercc2	+	19382030	19395692
AK046498	3.09834	1.63006	3.7113	0.0540476	0.830383	up	1	0	23	0	1	1	0.707016	0.0597462	3.44599	0.0597462	0.621297	0.718048	TUname2246	Genbank	chr8	+	108035337	108037138	1802	intergenic
ENSMUST00000146639	3.09364	0.372687	1.93664	0.164037	0.830383	up	1	0	2	0	0	0	0.707016	0.0597462	0.925468	0.0597462	0.0597462	0.0597462	Ppp1r12b	Ensembl	chr1	-	134834062	134835820	277	exon sense-overlapping	ENSMUST00000156348	Ppp1r12b	-	134759066	134846420
ENSMUST00000171128	3.09364	0.372687	1.93664	0.164037	0.830383	up	1	0	2	0	0	0	0.707016	0.0597462	0.925468	0.0597462	0.0597462	0.0597462	Slc25a23	Ensembl	chr17	-	57047194	57055385	818	exon sense-overlapping	NM_025877	Slc25a23	-	57043710	57059863
ENSMUST00000174526	3.09364	0.372687	1.93664	0.164037	0.830383	up	1	0	2	0	0	0	0.707016	0.0597462	0.925468	0.0597462	0.0597462	0.0597462	Hnrnpl	Ensembl	chr7	+	28821212	28822244	672	exon sense-overlapping	ENSMUST00000174477	Hnrnpl	+	28810936	28822240
ENSMUST00000164543	3.09364	0.372687	1.93664	0.164037	0.830383	up	1	0	2	0	0	0	0.707016	0.0597462	0.925468	0.0597462	0.0597462	0.0597462	Ndufb8	Ensembl	chr19	-	44550254	44552880	341	exon sense-overlapping	ENSMUST00000171415	Ndufb8	-	44548571	44555426
ENSMUST00000138414	3.09364	0.372687	1.93664	0.164037	0.830383	up	1	0	2	0	0	0	0.707016	0.0597462	0.925468	0.0597462	0.0597462	0.0597462	Mybl2	Ensembl	chr2	+	163068211	163073143	624	exon sense-overlapping	NM_008652	Mybl2	+	163054634	163084687
ENSMUST00000127669	3.09364	0.372687	1.93664	0.164037	0.830383	up	1	0	2	0	0	0	0.707016	0.0597462	0.925468	0.0597462	0.0597462	0.0597462	Rps5	Ensembl	chr7	+	12926037	12926684	570	exon sense-overlapping	ENSMUST00000147435	Rps5	+	12922317	12926494
ENSMUST00000127858	3.09364	0.372687	1.93664	0.164037	0.830383	up	1	0	2	0	0	0	0.707016	0.0597462	0.925468	0.0597462	0.0597462	0.0597462	Il4	Ensembl	chr11	-	53602981	53617224	541	exon sense-overlapping	ENSMUST00000140684	Il4	-	53612459	53618352
AK138571_2	3.09364	0.372687	1.93664	0.164037	0.830383	up	1	0	2	0	0	0	0.707016	0.0597462	0.925468	0.0597462	0.0597462	0.0597462
ENSMUST00000121456	3.09364	0.372687	1.93664	0.164037	0.830383	up	1	0	2	0	0	0	0.707016	0.0597462	0.925468	0.0597462	0.0597462	0.0597462	Gm14165	Ensembl	chr2	+	152353614	152354566	952	intergenic
TCONS_00006745	3.09364	0.372687	1.93664	0.164037	0.830383	up	1	0	2	0	0	0	0.707016	0.0597462	0.925468	0.0597462	0.0597462	0.0597462	XLOC_005123	Alexander et al 2013	chr12	+	70187557	70190090	1136	intergenic
ENSMUST00000155449	3.09345	2.20209	6.54533	0.0105171	0.830383	up	14	20	1	3	0	1	3.21789	3.59234	0.556593	1.34847	0.0597462	0.718048	Paqr7	Ensembl	chr4	+	134497040	134506995	437	exon sense-overlapping	ENSMUST00000095074	Paqr7	+	134497003	134510235
ENSMUST00000182813	3.0913	1.09703	2.21306	0.13685	0.830383	up	10	0	1	0	0	1	2.79571	0.0597462	0.556593	0.0597462	0.0597462	0.718048	Pdlim1	Ensembl	chr19	-	40222522	40230805	666	exon sense-overlapping	ENSMUST00000182432	Pdlim1	-	40230591	40271842
AK020271	3.08725	1.06831	2.17159	0.140583	0.830383	up	2	7	2	1	0	0	1.15223	2.29249	0.925468	0.626355	0.0597462	0.0597462	TUname40034	Genbank	chr6	+	125084866	125085851	983	intergenic
ENSMUST00000135689	3.07756	1.03623	2.09563	0.147723	0.830383	up	10	0	0	0	1	0	2.79571	0.0597462	0.0597462	0.0597462	0.621297	0.0597462	Rcn3	Ensembl	chr7	-	45091335	45092123	381	exon sense-overlapping	ENSMUST00000148175	Rcn3	-	45083604	45092185
ENSMUST00000145224	3.07212	2.61643	9.60574	0.00194013	0.479181	up	16	18	19	2	4	0	3.39019	3.45412	3.19911	1.03213	1.5975	0.0597462	Slc26a8	Ensembl	chr17	-	28649656	28689987	2249	exon sense-overlapping	ENSMUST00000114764	Slc26a8	-	28637782	28689987
ENSMUST00000164499	3.07165	0.370299	1.91915	0.165953	0.830383	up	0	1	2	0	0	0	0.0597462	0.671968	0.925468	0.0597462	0.0597462	0.0597462	Rell2	Ensembl	chr18	+	37956692	37958039	514	exon sense-overlapping	ENSMUST00000176902	Rell2	+	37955138	37959120
ENSMUST00000147161	3.07165	0.370299	1.91915	0.165953	0.830383	up	0	1	2	0	0	0	0.0597462	0.671968	0.925468	0.0597462	0.0597462	0.0597462	Pcnxl3	Ensembl	chr19	-	5679933	5681536	568	exon sense-overlapping	ENSMUST00000068169	Pcnxl3	-	5664639	5688149
ENSMUST00000124695	3.07165	0.370299	1.91915	0.165953	0.830383	up	0	1	2	0	0	0	0.0597462	0.671968	0.925468	0.0597462	0.0597462	0.0597462	Il4i1	Ensembl	chr7	+	44838690	44839781	865	exon sense-overlapping	NM_010215	Il4i1	+	44836287	44840809
ENSMUST00000159761	3.07165	0.370299	1.91915	0.165953	0.830383	up	0	1	2	0	0	0	0.0597462	0.671968	0.925468	0.0597462	0.0597462	0.0597462	Rtdr1	Ensembl	chr10	-	75024512	75032586	1063	exon sense-overlapping	ENSMUST00000159994	Rtdr1	-	75022303	75032528
NR_040309	3.07165	0.370299	1.91915	0.165953	0.830383	up	0	1	2	0	0	0	0.0597462	0.671968	0.925468	0.0597462	0.0597462	0.0597462	2310069G16Rik	RefSeq	chr15	+	44787762	44805829	879	natural antisense	uc007vqj.1	Sybu	-	44761034	44788063
ENSMUST00000135099	3.07165	0.370299	1.91915	0.165953	0.830383	up	0	1	2	0	0	0	0.0597462	0.671968	0.925468	0.0597462	0.0597462	0.0597462	Prrg2	Ensembl	chr7	-	45053894	45054880	665	exon sense-overlapping	NM_022999	Prrg2	-	45053606	45061652
uc012gwl.1	3.07165	0.370299	1.91915	0.165953	0.830383	up	0	1	2	0	0	0	0.0597462	0.671968	0.925468	0.0597462	0.0597462	0.0597462	Sltm	UCSC_knowngene	chr9	+	70542777	70592232	3602	exon sense-overlapping	NM_025690	Sltm	+	70542869	70592232
ENSMUST00000143045	3.07165	0.370299	1.91915	0.165953	0.830383	up	0	1	2	0	0	0	0.0597462	0.671968	0.925468	0.0597462	0.0597462	0.0597462	Tmem106a	Ensembl	chr11	+	101582243	101589434	1021	exon sense-overlapping	NM_144830	Tmem106a	+	101582241	101591785
ENSMUST00000138463	3.07165	0.370299	1.91915	0.165953	0.830383	up	0	1	2	0	0	0	0.0597462	0.671968	0.925468	0.0597462	0.0597462	0.0597462	Alpl	Ensembl	chr4	-	137755629	137796230	719	exon sense-overlapping	ENSMUST00000139951	Alpl	-	137752551	137766475
ENSMUST00000118644	3.07165	0.370299	1.91915	0.165953	0.830383	up	0	1	2	0	0	0	0.0597462	0.671968	0.925468	0.0597462	0.0597462	0.0597462	Gm8662	Ensembl	chrX	+	158248796	158249370	574	intergenic
ENSMUST00000126598	3.07165	0.370299	1.91915	0.165953	0.830383	up	0	1	2	0	0	0	0.0597462	0.671968	0.925468	0.0597462	0.0597462	0.0597462	Atm	Ensembl	chr9	-	53440104	53442560	281	exon sense-overlapping	uc012gtj.1	Atm	-	53437121	53533966
TCONS_00015079	3.07165	0.370299	1.91915	0.165953	0.830383	up	0	1	2	0	0	0	0.0597462	0.671968	0.925468	0.0597462	0.0597462	0.0597462	XLOC_011142	Alexander et al 2013	chr18	+	35000103	35003617	613	intergenic
ENSMUST00000150510	3.07165	0.370299	1.91915	0.165953	0.830383	up	0	1	2	0	0	0	0.0597462	0.671968	0.925468	0.0597462	0.0597462	0.0597462	Fmn1	Ensembl	chr2	+	113685089	113693151	385	exon sense-overlapping	ENSMUST00000099576	Fmn1	+	113327735	113716767
ENSMUST00000124251	3.07165	0.370299	1.91915	0.165953	0.830383	up	0	1	2	0	0	0	0.0597462	0.671968	0.925468	0.0597462	0.0597462	0.0597462	Cdk5rap2	Ensembl	chr4	-	70242470	70243852	582	exon sense-overlapping	NM_145990	Cdk5rap2	-	70223023	70410367
uc007wqa.2	3.07165	0.370299	1.91915	0.165953	0.830383	up	0	1	2	0	0	0	0.0597462	0.671968	0.925468	0.0597462	0.0597462	0.0597462	DQ566296	UCSC_knowngene	chr15	-	78659516	78659548	32	intergenic
ENSMUST00000120953	3.07165	0.370299	1.91915	0.165953	0.830383	up	0	1	2	0	0	0	0.0597462	0.671968	0.925468	0.0597462	0.0597462	0.0597462	Gm13413	Ensembl	chr2	+	32406054	32406656	602	intergenic
ENSMUST00000159128	3.07165	0.370299	1.91915	0.165953	0.830383	up	0	1	2	0	0	0	0.0597462	0.671968	0.925468	0.0597462	0.0597462	0.0597462	Ttc21a	Ensembl	chr9	+	119937634	119967053	4041	exon sense-overlapping	NM_028735	Ttc21a	+	119937605	119967793
ENSMUST00000146800	3.07165	0.370299	1.91915	0.165953	0.830383	up	0	1	2	0	0	0	0.0597462	0.671968	0.925468	0.0597462	0.0597462	0.0597462	Fgd2	Ensembl	chr17	+	29360941	29367006	1184	exon sense-overlapping	uc008bsy.2	Fgd2	+	29365415	29379535
ENSMUST00000180383	3.07165	0.370299	1.91915	0.165953	0.830383	up	0	1	2	0	0	0	0.0597462	0.671968	0.925468	0.0597462	0.0597462	0.0597462	Gm26594	Ensembl	chr3	+	95855965	95861485	1094	bidirectional	ENSMUST00000015892	Prpf3	-	95830123	95855885
ENSMUST00000129242	3.07165	0.370299	1.91915	0.165953	0.830383	up	0	1	2	0	0	0	0.0597462	0.671968	0.925468	0.0597462	0.0597462	0.0597462	Cox15	Ensembl	chr19	-	43738036	43740102	380	exon sense-overlapping	NM_144874	Cox15	-	43733253	43753000
TCONS_00010848	3.07165	0.370299	1.91915	0.165953	0.830383	up	0	1	2	0	0	0	0.0597462	0.671968	0.925468	0.0597462	0.0597462	0.0597462	XLOC_008161	Alexander et al 2013	chr15	+	79850811	79867219	979	intergenic
ENSMUST00000123684	3.07165	0.370299	1.91915	0.165953	0.830383	up	0	1	2	0	0	0	0.0597462	0.671968	0.925468	0.0597462	0.0597462	0.0597462	Fxn	Ensembl	chr19	-	24261500	24280568	1072	exon sense-overlapping	NM_008044	Fxn	-	24261452	24280586
ENSMUST00000094035	3.07165	0.370299	1.91915	0.165953	0.830383	up	0	1	2	0	0	0	0.0597462	0.671968	0.925468	0.0597462	0.0597462	0.0597462	Gm13597	Ensembl	chr2	+	68554500	68555750	1250	intergenic
ENSMUST00000123483	3.07165	0.370299	1.91915	0.165953	0.830383	up	0	1	2	0	0	0	0.0597462	0.671968	0.925468	0.0597462	0.0597462	0.0597462	Gm13387	Ensembl	chr2	-	25122602	25145396	638	intergenic
NR_028021	3.07165	0.370299	1.91915	0.165953	0.830383	up	0	1	2	0	0	0	0.0597462	0.671968	0.925468	0.0597462	0.0597462	0.0597462	Ppifos	RefSeq	chr14	-	25696355	25701282	1777	natural antisense	NM_134084	Ppif	+	25694169	25700466
ENSMUST00000169881	3.07165	0.370299	1.91915	0.165953	0.830383	up	0	1	2	0	0	0	0.0597462	0.671968	0.925468	0.0597462	0.0597462	0.0597462	Gm17094	Ensembl	chr4	-	39398044	39450249	3334	bidirectional	NM_001081095	1700009N14Rik	+	39450292	39451778
AK054030	3.0688	1.91427	4.89056	0.0270056	0.830383	up	1	22	5	1	1	1	0.707016	3.71847	1.67121	0.626355	0.621297	0.718048	TUname16636	Genbank	chr10	-	30511759	30514123	2366	intergenic
uc009seg.2	3.06576	1.54408	3.3614	0.0667436	0.830383	up	1	11	8	2	0	0	0.707016	2.8284	2.16039	1.03213	0.0597462	0.0597462	1700048O20Rik	UCSC_knowngene	chr9	+	121937975	121941994	593	exon sense-overlapping	ENSMUST00000063103	1700048O20Rik	+	121938134	121947014
AK054556	3.06115	1.57928	3.45444	0.0630845	0.830383	up	4	6	11	1	0	1	1.76674	2.12037	2.52504	0.626355	0.0597462	0.718048	TUname1368	Genbank	chr5	+	22400885	22404718	3835	intergenic
AK158514	3.05528	1.10524	2.20914	0.137198	0.830383	up	0	0	13	0	1	0	0.0597462	0.0597462	2.72528	0.0597462	0.621297	0.0597462	TUname42419	Genbank	chr9	-	122008353	122012140	2232	intergenic
ENSMUST00000139505	3.04752	1.08173	2.15231	0.142358	0.830383	up	0	4	8	1	0	0	0.0597462	1.69872	2.16039	0.626355	0.0597462	0.0597462	Pou4f1	Ensembl	chr14	-	104463972	104465365	799	exon sense-overlapping	NM_011143	Pou4f1	-	104462324	104467999
ENSMUST00000162656	3.04123	1.05426	2.08987	0.148281	0.830383	up	6	0	5	1	0	0	2.19633	0.0597462	1.67121	0.626355	0.0597462	0.0597462	Tbxas1	Ensembl	chr6	+	38971864	38983526	410	exon sense-overlapping	ENSMUST00000160963	Tbxas1	+	38941400	39001363
ENSMUST00000127411	3.04123	1.05426	2.08987	0.148281	0.830383	up	6	0	5	1	0	0	2.19633	0.0597462	1.67121	0.626355	0.0597462	0.0597462	N4bp2	Ensembl	chr5	+	65809730	65815058	574	exon sense-overlapping	ENSMUST00000138239	N4bp2	+	65764119	65817284
ENSMUST00000156860	3.03955	1.51609	3.22695	0.0724379	0.830383	up	4	9	6	0	2	0	1.76674	2.58519	1.85333	0.0597462	1.02449	0.0597462	Fmo2	Ensembl	chr1	-	162888077	162898726	1000	exon sense-overlapping	NM_018881	Fmo2	-	162875046	162898712
ENSMUST00000147449	3.03483	1.02464	2.02756	0.154471	0.830383	up	8	1	1	0	1	0	2.52693	0.671968	0.556593	0.0597462	0.621297	0.0597462	Gm15541	Ensembl	chr7	-	27502717	27508122	2713	natural antisense	NM_198048	Prx	+	27499323	27520041
TCONS_00000349	3.03483	1.02464	2.02756	0.154471	0.830383	up	8	1	1	0	1	0	2.52693	0.671968	0.556593	0.0597462	0.621297	0.0597462	XLOC_000762	Alexander et al 2013	chr1	-	4142623	4170403	714	intergenic
ENSMUST00000136303	3.02611	1.57628	3.36026	0.06679	0.830383	up	4	11	5	0	0	2	1.76674	2.8284	1.67121	0.0597462	0.0597462	1.1684	9530068E07Rik	Ensembl	chr11	+	52396645	52403274	368	exon sense-overlapping	NM_153117	9530068E07Rik	+	52396427	52408723
ENSMUST00000129120	3.02466	1.10335	2.14645	0.142903	0.830383	up	1	5	6	0	0	1	0.707016	1.9249	1.85333	0.0597462	0.0597462	0.718048	Rgs10	Ensembl	chr7	-	128388845	128404478	469	exon sense-overlapping	NM_026418	Rgs10	-	128373624	128418172
ENSMUST00000141344	3.02466	1.10335	2.14645	0.142903	0.830383	up	1	5	6	0	0	1	0.707016	1.9249	1.85333	0.0597462	0.0597462	0.718048	D430001F17Rik	Ensembl	chr16	+	91931236	91962915	1858	natural antisense	NM_138597	Atp5o	-	91925222	91931630
TCONS_00017576	3.02035	1.02195	2.00923	0.156347	0.830383	up	3	7	0	0	1	0	1.49196	2.29249	0.0597462	0.0597462	0.621297	0.0597462	XLOC_013743	Alexander et al 2013	chr2	+	179040601	179049025	370	intergenic
ENSMUST00000131693	3.01965	1.07768	2.09116	0.148157	0.830383	up	4	5	2	0	0	1	1.76674	1.9249	0.925468	0.0597462	0.0597462	0.718048	Eif4enif1	Ensembl	chr11	+	3202688	3213434	405	exon sense-overlapping	ENSMUST00000125637	Eif4enif1	+	3202733	3220530
ENSMUST00000038772	3.00481	1.50307	3.12979	0.0768763	0.830383	up	0	12	7	0	2	0	0.0597462	2.93618	2.01501	0.0597462	1.02449	0.0597462	Tmem5	Ensembl	chr10	-	122081259	122097156	1546	exon sense-overlapping	NM_153059	Tmem5	-	122081259	122097102
ENSMUST00000147617	3.00321	1.0426	2.02492	0.154739	0.830383	up	4	1	6	0	1	0	1.76674	0.671968	1.85333	0.0597462	0.621297	0.0597462	Fmo2	Ensembl	chr1	-	162897680	162898720	680	exon sense-overlapping	ENSMUST00000111510	Fmo2	-	162876435	162898665
NR_030701	3.00152	2.25292	6.46608	0.0110062	0.830383	up	0	0	44	0	0	4	0.0597462	0.0597462	4.31446	0.0597462	0.0597462	1.78784	Gm20554	RefSeq	chr13	-	72623465	72628564	5099	bidirectional	NM_010574	Irx2	+	72628977	72634194
ENSMUST00000139770	3.00144	1.01648	1.98314	0.159063	0.830383	up	4	5	1	0	1	0	1.76674	1.9249	0.556593	0.0597462	0.621297	0.0597462	Eng	Ensembl	chr2	+	32646992	32650367	258	exon sense-overlapping	NM_001146350	Eng	+	32646594	32682669
AK144717_2	2.99926	1.01509	1.97924	0.159473	0.830383	up	7	1	2	0	1	0	2.37108	0.671968	0.925468	0.0597462	0.621297	0.0597462
ENSMUST00000183505	2.99901	1.09615	2.10275	0.147037	0.830383	up	1	4	7	0	0	1	0.707016	1.69872	2.01501	0.0597462	0.0597462	0.718048	Hmgcll1	Ensembl	chr9	+	76015014	76072821	363	exon sense-overlapping	ENSMUST00000183979	Hmgcll1	+	76014983	76134187
ENSMUST00000141485	2.99901	1.09615	2.10275	0.147037	0.830383	up	1	4	7	0	0	1	0.707016	1.69872	2.01501	0.0597462	0.0597462	0.718048	Gm15234	Ensembl	chr3	+	94658960	94660115	1058	bidirectional	ENSMUST00000107277	Tuft1	-	94612995	94658800
ENSMUST00000181591	2.99681	1.8907	4.58328	0.0322873	0.830383	up	6	16	5	0	1	2	2.19633	3.30125	1.67121	0.0597462	0.621297	1.1684	Gm8177	Ensembl	chr3	-	57135495	57136831	1336	intergenic
ENSMUST00000147366	2.99518	1.01584	1.97591	0.159825	0.830383	up	0	10	0	0	1	0	0.0597462	2.71192	0.0597462	0.0597462	0.621297	0.0597462	Slc26a11	Ensembl	chr11	+	119355592	119370963	570	exon sense-overlapping	NM_178743	Slc26a11	+	119355556	119381076
ENSMUST00000130711	2.99497	0.361196	1.85742	0.172925	0.830383	up	0	0	3	0	0	0	0.0597462	0.0597462	1.21897	0.0597462	0.0597462	0.0597462	Psen2	Ensembl	chr1	-	180227003	180230065	1170	exon sense-overlapping	ENSMUST00000111106	Psen2	-	180227003	180253138
ENSMUST00000180102	2.99497	0.361196	1.85742	0.172925	0.830383	up	0	0	3	0	0	0	0.0597462	0.0597462	1.21897	0.0597462	0.0597462	0.0597462	4933436C20Rik	Ensembl	chr8	-	92336210	92355764	732	intergenic
AK157495	2.99497	0.361196	1.85742	0.172925	0.830383	up	0	0	3	0	0	0	0.0597462	0.0597462	1.21897	0.0597462	0.0597462	0.0597462	TUname9083	Genbank	chr5	-	27195954	27198868	2920	intronic antisense	NM_010075	Dpp6	+	26817356	27727500
ENSMUST00000184751	2.99497	0.361196	1.85742	0.172925	0.830383	up	0	0	3	0	0	0	0.0597462	0.0597462	1.21897	0.0597462	0.0597462	0.0597462	Rtel1	Ensembl	chr2	+	181335935	181347048	614	exon sense-overlapping	NM_001166668	Rtel1	+	181319723	181356616
AK041343	2.99497	0.361196	1.85742	0.172925	0.830383	up	0	0	3	0	0	0	0.0597462	0.0597462	1.21897	0.0597462	0.0597462	0.0597462	TUname17941	Genbank	chr2	-	48599638	48602249	2611	intergenic
ENSMUST00000122839	2.99497	0.361196	1.85742	0.172925	0.830383	up	0	0	3	0	0	0	0.0597462	0.0597462	1.21897	0.0597462	0.0597462	0.0597462	Gm12404	Ensembl	chr4	+	41520693	41525823	1661	natural antisense	uc012dcc.2	2310028H24Rik	-	41519903	41569527
ENSMUST00000172994	2.99497	0.361196	1.85742	0.172925	0.830383	up	0	0	3	0	0	0	0.0597462	0.0597462	1.21897	0.0597462	0.0597462	0.0597462	H2-Q1	Ensembl	chr17	+	35320404	35325099	2860	exon sense-overlapping	ENSMUST00000105041	H2-Q1	+	35320546	35325099
uc029ryx.1	2.99497	0.361196	1.85742	0.172925	0.830383	up	0	0	3	0	0	0	0.0597462	0.0597462	1.21897	0.0597462	0.0597462	0.0597462	AK184064	UCSC_knowngene	chr13	+	12440077	12440276	199	natural antisense	NM_018886	Lgals8	-	12439414	12461738
ENSMUST00000162847	2.99497	0.361196	1.85742	0.172925	0.830383	up	0	0	3	0	0	0	0.0597462	0.0597462	1.21897	0.0597462	0.0597462	0.0597462	Poc1b	Ensembl	chr10	+	99192891	99196850	356	exon sense-overlapping	ENSMUST00000159990	Poc1b	+	99107102	99198074
ENSMUST00000148228	2.99497	0.361196	1.85742	0.172925	0.830383	up	0	0	3	0	0	0	0.0597462	0.0597462	1.21897	0.0597462	0.0597462	0.0597462	Ppp1r8	Ensembl	chr4	-	132834697	132843134	480	exon sense-overlapping	NM_146154	Ppp1r8	-	132826924	132843169
ENSMUST00000120322	2.99497	0.361196	1.85742	0.172925	0.830383	up	0	0	3	0	0	0	0.0597462	0.0597462	1.21897	0.0597462	0.0597462	0.0597462	Slc6a19	Ensembl	chr13	-	73679746	73692636	3592	exon sense-overlapping	NM_028878	Slc6a19	-	73681156	73700695
ENSMUST00000086451	2.99497	0.361196	1.85742	0.172925	0.830383	up	0	0	3	0	0	0	0.0597462	0.0597462	1.21897	0.0597462	0.0597462	0.0597462	Nos1	Ensembl	chr5	+	117842185	117954364	5600	exon sense-overlapping	ENSMUST00000138579	Nos1	+	117781031	117867456
uc012bww.1	2.99497	0.361196	1.85742	0.172925	0.830383	up	0	0	3	0	0	0	0.0597462	0.0597462	1.21897	0.0597462	0.0597462	0.0597462	Myo3b	UCSC_knowngene	chr2	+	70039297	70429195	6098	exon sense-overlapping	NM_177376	Myo3b	+	70039125	70429195
ENSMUST00000136814	2.99497	0.361196	1.85742	0.172925	0.830383	up	0	0	3	0	0	0	0.0597462	0.0597462	1.21897	0.0597462	0.0597462	0.0597462	AW551984	Ensembl	chr9	-	39600294	39603627	632	exon sense-overlapping	ENSMUST00000130829	AW551984	-	39600556	39603378
ENSMUST00000151099	2.99497	0.361196	1.85742	0.172925	0.830383	up	0	0	3	0	0	0	0.0597462	0.0597462	1.21897	0.0597462	0.0597462	0.0597462	C430049B03Rik	Ensembl	chrX	-	53056192	53057190	770	intergenic
ENSMUST00000122989	2.99497	0.361196	1.85742	0.172925	0.830383	up	0	0	3	0	0	0	0.0597462	0.0597462	1.21897	0.0597462	0.0597462	0.0597462	Strada	Ensembl	chr11	-	106163329	106202168	2083	exon sense-overlapping	ENSMUST00000106865	Ccdc47	-	106200778	106204428
ENSMUST00000129166	2.99497	0.361196	1.85742	0.172925	0.830383	up	0	0	3	0	0	0	0.0597462	0.0597462	1.21897	0.0597462	0.0597462	0.0597462	Tm2d3	Ensembl	chr7	+	65693466	65697879	565	exon sense-overlapping	ENSMUST00000065574	Tm2d3	+	65691168	65701911
ENSMUST00000131660	2.99497	0.361196	1.85742	0.172925	0.830383	up	0	0	3	0	0	0	0.0597462	0.0597462	1.21897	0.0597462	0.0597462	0.0597462	Ccdc141	Ensembl	chr2	-	77074760	77170610	1464	exon sense-overlapping	ENSMUST00000049544	Ccdc141	-	77009901	77170635
NR_045426	2.99497	0.361196	1.85742	0.172925	0.830383	up	0	0	3	0	0	0	0.0597462	0.0597462	1.21897	0.0597462	0.0597462	0.0597462	5430428K19Rik	RefSeq	chrX	-	6452375	6574663	904	intronic antisense	NM_001040459	Shroom4	+	6400144	6633717
ENSMUST00000146015	2.99497	0.361196	1.85742	0.172925	0.830383	up	0	0	3	0	0	0	0.0597462	0.0597462	1.21897	0.0597462	0.0597462	0.0597462	Scfd2	Ensembl	chr5	-	74206088	74225484	597	exon sense-overlapping	ENSMUST00000113542	Scfd2	-	74206092	74531619
uc007wsq.2	2.99497	0.361196	1.85742	0.172925	0.830383	up	0	0	3	0	0	0	0.0597462	0.0597462	1.21897	0.0597462	0.0597462	0.0597462	Micall1	UCSC_knowngene	chr15	+	79131715	79136901	4122	exon sense-overlapping	uc007wsp.2	Micall1	+	79125051	79136901
ENSMUST00000157000	2.99497	0.361196	1.85742	0.172925	0.830383	up	0	0	3	0	0	0	0.0597462	0.0597462	1.21897	0.0597462	0.0597462	0.0597462	Cacna1f	Ensembl	chrX	+	7628188	7629762	642	exon sense-overlapping	NM_019582	Cacna1f	+	7607102	7635196
AK042143	2.99497	0.361196	1.85742	0.172925	0.830383	up	0	0	3	0	0	0	0.0597462	0.0597462	1.21897	0.0597462	0.0597462	0.0597462	TUname14355	Genbank	chr9	-	47773790	47776737	2951	intronic antisense	NM_207676	Cadm1	+	47530351	47853385
ENSMUST00000148441	2.99497	0.361196	1.85742	0.172925	0.830383	up	0	0	3	0	0	0	0.0597462	0.0597462	1.21897	0.0597462	0.0597462	0.0597462	Elp4	Ensembl	chr2	-	105866069	105904483	342	exon sense-overlapping	NM_023876	Elp4	-	105700108	105904500
ENSMUST00000152773	2.99497	0.361196	1.85742	0.172925	0.830383	up	0	0	3	0	0	0	0.0597462	0.0597462	1.21897	0.0597462	0.0597462	0.0597462	Acin1	Ensembl	chr14	-	54642901	54644536	844	exon sense-overlapping	NM_023190	Acin1	-	54642160	54686931
TCONS_00021101	2.99497	0.361196	1.85742	0.172925	0.830383	up	0	0	3	0	0	0	0.0597462	0.0597462	1.21897	0.0597462	0.0597462	0.0597462	XLOC_016206	Alexander et al 2013	chr3	-	131317234	131318614	1270	intergenic
ENSMUST00000137582	2.99497	0.361196	1.85742	0.172925	0.830383	up	0	0	3	0	0	0	0.0597462	0.0597462	1.21897	0.0597462	0.0597462	0.0597462	Gm13594	Ensembl	chr2	+	65238755	65239675	476	natural antisense	ENSMUST00000156643	Cobll1	-	65133779	65239096
ENSMUST00000145845	2.99497	0.361196	1.85742	0.172925	0.830383	up	0	0	3	0	0	0	0.0597462	0.0597462	1.21897	0.0597462	0.0597462	0.0597462	Gm11612	Ensembl	chr11	+	97566710	97576186	161	intronic antisense	ENSMUST00000107590	Srcin1	-	97517674	97573944
ENSMUST00000136854	2.99497	0.361196	1.85742	0.172925	0.830383	up	0	0	3	0	0	0	0.0597462	0.0597462	1.21897	0.0597462	0.0597462	0.0597462	Timeless	Ensembl	chr10	+	128249212	128249860	560	exon sense-overlapping	NM_001164081	Timeless	+	128232062	128252941
ENSMUST00000161468	2.99497	0.361196	1.85742	0.172925	0.830383	up	0	0	3	0	0	0	0.0597462	0.0597462	1.21897	0.0597462	0.0597462	0.0597462	Hr	Ensembl	chr14	+	70552244	70554665	337	exon sense-overlapping	NM_021877	Hr	+	70554055	70573542
ENSMUST00000124553	2.99497	0.361196	1.85742	0.172925	0.830383	up	0	0	3	0	0	0	0.0597462	0.0597462	1.21897	0.0597462	0.0597462	0.0597462	Raf1	Ensembl	chr6	-	115622873	115630726	625	exon sense-overlapping	ENSMUST00000147979	Raf1	-	115626283	115632995
ENSMUST00000122344	2.99497	0.361196	1.85742	0.172925	0.830383	up	0	0	3	0	0	0	0.0597462	0.0597462	1.21897	0.0597462	0.0597462	0.0597462	Gm15077	Ensembl	chrX	-	141302348	141302710	362	intron sense-overlapping	NM_053185	Col4a6	-	141165402	141474076
TCONS_00006910	2.99497	0.361196	1.85742	0.172925	0.830383	up	0	0	3	0	0	0	0.0597462	0.0597462	1.21897	0.0597462	0.0597462	0.0597462	XLOC_005633	Alexander et al 2013	chr12	-	70376160	70378062	510	intergenic
ENSMUST00000154777	2.99497	0.361196	1.85742	0.172925	0.830383	up	0	0	3	0	0	0	0.0597462	0.0597462	1.21897	0.0597462	0.0597462	0.0597462	Acsl3	Ensembl	chr1	+	78690262	78697029	742	exon sense-overlapping	NM_001033606	Acsl3	+	78657824	78707743
AK019533	2.99497	0.361196	1.85742	0.172925	0.830383	up	0	0	3	0	0	0	0.0597462	0.0597462	1.21897	0.0597462	0.0597462	0.0597462	TUname23805	Genbank	chr11	+	118342606	118343564	959	intronic antisense	ENSMUST00000155707	Timp2	-	118303700	118355740
AK131630	2.99497	0.361196	1.85742	0.172925	0.830383	up	0	0	3	0	0	0	0.0597462	0.0597462	1.21897	0.0597462	0.0597462	0.0597462	TUname36732	Genbank	chr5	-	75154884	75155334	451	intronic antisense	uc008xua.1	Pdgfra	+	75152290	75175150
ENSMUST00000135297	2.99497	0.361196	1.85742	0.172925	0.830383	up	0	0	3	0	0	0	0.0597462	0.0597462	1.21897	0.0597462	0.0597462	0.0597462	1700011J10Rik	Ensembl	chr2	+	72979423	72988442	370	natural antisense	NM_001018042	Sp3	-	72936431	72980446
BB257274	2.99497	0.361196	1.85742	0.172925	0.830383	up	0	0	3	0	0	0	0.0597462	0.0597462	1.21897	0.0597462	0.0597462	0.0597462	TUname63420	Genbank	chr10	+	39254432	39255091	674	intergenic
ENSMUST00000134937	2.99497	0.361196	1.85742	0.172925	0.830383	up	0	0	3	0	0	0	0.0597462	0.0597462	1.21897	0.0597462	0.0597462	0.0597462	Fermt1	Ensembl	chr2	-	132904388	132945629	5236	exon sense-overlapping	NM_198029	Fermt1	-	132904178	132946036
ENSMUST00000163161	2.99497	0.361196	1.85742	0.172925	0.830383	up	0	0	3	0	0	0	0.0597462	0.0597462	1.21897	0.0597462	0.0597462	0.0597462	Tonsl	Ensembl	chr15	-	76637187	76638279	491	exon sense-overlapping	NM_183091	Tonsl	-	76626236	76639929
ENSMUST00000137562	2.99497	0.361196	1.85742	0.172925	0.830383	up	0	0	3	0	0	0	0.0597462	0.0597462	1.21897	0.0597462	0.0597462	0.0597462	Elmsan1	Ensembl	chr12	-	84152944	84155232	425	exon sense-overlapping	NM_001163501	Elmsan1	-	84149173	84218881
uc007sdi.1	2.99497	0.361196	1.85742	0.172925	0.830383	up	0	0	3	0	0	0	0.0597462	0.0597462	1.21897	0.0597462	0.0597462	0.0597462	AK006024	UCSC_knowngene	chr14	-	6350642	6352021	715	intron sense-overlapping	uc029sex.1	LOC100861615	-	6259746	6885012
ENSMUST00000143151	2.99497	0.361196	1.85742	0.172925	0.830383	up	0	0	3	0	0	0	0.0597462	0.0597462	1.21897	0.0597462	0.0597462	0.0597462	Fyttd1	Ensembl	chr16	+	32877499	32891409	445	exon sense-overlapping	NM_027226	Fyttd1	+	32877783	32908963
ENSMUST00000128354	2.99497	0.361196	1.85742	0.172925	0.830383	up	0	0	3	0	0	0	0.0597462	0.0597462	1.21897	0.0597462	0.0597462	0.0597462	Nr1h2	Ensembl	chr7	-	44550373	44551623	547	exon sense-overlapping	ENSMUST00000107910	Nr1h2	-	44549634	44553923
ENSMUST00000119964	2.99497	0.361196	1.85742	0.172925	0.830383	up	0	0	3	0	0	0	0.0597462	0.0597462	1.21897	0.0597462	0.0597462	0.0597462	Gm11763	Ensembl	chr2	-	145701413	145701725	312	intergenic
ENSMUST00000136523	2.99497	0.361196	1.85742	0.172925	0.830383	up	0	0	3	0	0	0	0.0597462	0.0597462	1.21897	0.0597462	0.0597462	0.0597462	Sgsh	Ensembl	chr11	-	119343424	119355502	4191	exon sense-overlapping	ENSMUST00000100172	Sgsh	-	119343497	119355510
ENSMUST00000156878	2.99497	0.361196	1.85742	0.172925	0.830383	up	0	0	3	0	0	0	0.0597462	0.0597462	1.21897	0.0597462	0.0597462	0.0597462	Myo1g	Ensembl	chr11	-	6512963	6520958	4752	exon sense-overlapping	NM_178440	Myo1g	-	6506547	6520958
ENSMUST00000143738	2.99497	0.361196	1.85742	0.172925	0.830383	up	0	0	3	0	0	0	0.0597462	0.0597462	1.21897	0.0597462	0.0597462	0.0597462	Nespos	Ensembl	chr2	-	174284352	174285435	1083	natural antisense	ENSMUST00000109095	Gnas	+	174284319	174296895
AK080213	2.99497	0.361196	1.85742	0.172925	0.830383	up	0	0	3	0	0	0	0.0597462	0.0597462	1.21897	0.0597462	0.0597462	0.0597462	TUname11186	Genbank	chr3	+	130884850	130885561	712	intergenic
ENSMUST00000150016	2.99497	0.361196	1.85742	0.172925	0.830383	up	0	0	3	0	0	0	0.0597462	0.0597462	1.21897	0.0597462	0.0597462	0.0597462	Spag5	Ensembl	chr11	+	78315356	78316041	428	exon sense-overlapping	NM_017407	Spag5	+	78301590	78322454
CF172655	2.99497	0.361196	1.85742	0.172925	0.830383	up	0	0	3	0	0	0	0.0597462	0.0597462	1.21897	0.0597462	0.0597462	0.0597462	TUname63880	Genbank	chr9	-	63926654	63937121	640	intergenic
uc008gyv.1	2.99497	0.361196	1.85742	0.172925	0.830383	up	0	0	3	0	0	0	0.0597462	0.0597462	1.21897	0.0597462	0.0597462	0.0597462	AK089615	UCSC_knowngene	chr19	-	21162481	21248449	1128	intergenic
ENSMUST00000120103	2.99497	0.361196	1.85742	0.172925	0.830383	up	0	0	3	0	0	0	0.0597462	0.0597462	1.21897	0.0597462	0.0597462	0.0597462	Gm11242	Ensembl	chr4	+	76692142	76694599	2457	intronic antisense	NM_011211	Ptprd	-	75941236	78211895
uc029skg.1	2.99497	0.361196	1.85742	0.172925	0.830383	up	0	0	3	0	0	0	0.0597462	0.0597462	1.21897	0.0597462	0.0597462	0.0597462	Tcra-V2	UCSC_knowngene	chr14	+	53763636	54149146	58	exon sense-overlapping	uc029skd.1	Tcra-V2.6	+	53640712	53763691
ENSMUST00000155794	2.99497	0.361196	1.85742	0.172925	0.830383	up	0	0	3	0	0	0	0.0597462	0.0597462	1.21897	0.0597462	0.0597462	0.0597462	Tph2	Ensembl	chr10	-	115174079	115175558	293	exon sense-overlapping	NM_173391	Tph2	-	115078640	115185022
uc009ckw.2	2.99497	0.361196	1.85742	0.172925	0.830383	up	0	0	3	0	0	0	0.0597462	0.0597462	1.21897	0.0597462	0.0597462	0.0597462	DQ568095	UCSC_knowngene	chr6	-	81898386	81898464	78	intergenic
AV585486	2.99497	0.361196	1.85742	0.172925	0.830383	up	0	0	3	0	0	0	0.0597462	0.0597462	1.21897	0.0597462	0.0597462	0.0597462	TUname63380	Genbank	chr13	-	94843785	94844307	522	intergenic
AK016944	2.99497	0.361196	1.85742	0.172925	0.830383	up	0	0	3	0	0	0	0.0597462	0.0597462	1.21897	0.0597462	0.0597462	0.0597462	TUname35293	Genbank	chr6	-	56714499	56715732	1236	natural antisense	NM_030235	Avl9	+	56714904	56761911
uc029vmt.1	2.99497	0.361196	1.85742	0.172925	0.830383	up	0	0	3	0	0	0	0.0597462	0.0597462	1.21897	0.0597462	0.0597462	0.0597462	DQ696965	UCSC_knowngene	chr5	-	114818786	114818821	35	intron sense-overlapping	ENSMUST00000140374	Gm20499	-	114809035	114823460
TCONS_00004273	2.99497	0.361196	1.85742	0.172925	0.830383	up	0	0	3	0	0	0	0.0597462	0.0597462	1.21897	0.0597462	0.0597462	0.0597462	XLOC_003979	Alexander et al 2013	chr11	-	31704394	31712749	4403	intergenic
AK050986	2.99497	0.361196	1.85742	0.172925	0.830383	up	0	0	3	0	0	0	0.0597462	0.0597462	1.21897	0.0597462	0.0597462	0.0597462	TUname39024	Genbank	chr2	+	181407659	181409524	1866	intronic antisense	ENSMUST00000029106	Zbtb46	-	181387761	181459426
ENSMUST00000181528	2.99497	0.361196	1.85742	0.172925	0.830383	up	0	0	3	0	0	0	0.0597462	0.0597462	1.21897	0.0597462	0.0597462	0.0597462	4930528D03Rik	Ensembl	chr13	+	59733644	59735210	1339	intergenic
ENSMUST00000137588	2.99497	0.361196	1.85742	0.172925	0.830383	up	0	0	3	0	0	0	0.0597462	0.0597462	1.21897	0.0597462	0.0597462	0.0597462	Ak8	Ensembl	chr2	+	28742249	28760136	397	exon sense-overlapping	NM_001033874	Ak8	+	28700160	28813165
ENSMUST00000131696	2.99497	0.361196	1.85742	0.172925	0.830383	up	0	0	3	0	0	0	0.0597462	0.0597462	1.21897	0.0597462	0.0597462	0.0597462	Nol9	Ensembl	chr4	+	152039362	152060042	3616	exon sense-overlapping	NM_028727	Nol9	+	152039326	152061494
ENSMUST00000139895	2.99497	0.361196	1.85742	0.172925	0.830383	up	0	0	3	0	0	0	0.0597462	0.0597462	1.21897	0.0597462	0.0597462	0.0597462	Gm13203	Ensembl	chr4	+	148713702	148716581	520	intergenic
AK044621	2.99497	0.361196	1.85742	0.172925	0.830383	up	0	0	3	0	0	0	0.0597462	0.0597462	1.21897	0.0597462	0.0597462	0.0597462	TUname37429	Genbank	chr14	-	48672093	48673899	1808	intergenic
ENSMUST00000160941	2.99497	0.361196	1.85742	0.172925	0.830383	up	0	0	3	0	0	0	0.0597462	0.0597462	1.21897	0.0597462	0.0597462	0.0597462	Slc9b1	Ensembl	chr3	+	135348045	135358306	1407	exon sense-overlapping	NM_028946	Slc9b1	+	135348036	135397827
ENSMUST00000159662	2.99497	0.361196	1.85742	0.172925	0.830383	up	0	0	3	0	0	0	0.0597462	0.0597462	1.21897	0.0597462	0.0597462	0.0597462	Ecel1	Ensembl	chr1	-	87155022	87155311	191	exon sense-overlapping	ENSMUST00000161002	Ecel1	-	87147654	87156521
ENSMUST00000144017	2.99497	0.361196	1.85742	0.172925	0.830383	up	0	0	3	0	0	0	0.0597462	0.0597462	1.21897	0.0597462	0.0597462	0.0597462	AI507597	Ensembl	chr4	+	141614025	141615604	820	natural antisense	NM_145987	Tmem82	-	141614232	141618633
ENSMUST00000154140	2.99497	0.361196	1.85742	0.172925	0.830383	up	0	0	3	0	0	0	0.0597462	0.0597462	1.21897	0.0597462	0.0597462	0.0597462	C130080G10Rik	Ensembl	chr2	+	114054334	114061463	1564	bidirectional	ENSMUST00000149125	Actc1	-	114051902	114053548
ENSMUST00000118994	2.99497	0.361196	1.85742	0.172925	0.830383	up	0	0	3	0	0	0	0.0597462	0.0597462	1.21897	0.0597462	0.0597462	0.0597462	Gm12601	Ensembl	chr4	-	88612652	88614044	846	intergenic
ENSMUST00000144839	2.99497	0.361196	1.85742	0.172925	0.830383	up	0	0	3	0	0	0	0.0597462	0.0597462	1.21897	0.0597462	0.0597462	0.0597462	Mob3c	Ensembl	chr4	+	115828096	115831711	634	exon sense-overlapping	NM_175308	Mob3c	+	115828091	115836183
ENSMUST00000146344	2.99497	0.361196	1.85742	0.172925	0.830383	up	0	0	3	0	0	0	0.0597462	0.0597462	1.21897	0.0597462	0.0597462	0.0597462	Ftcd	Ensembl	chr10	+	76587132	76588568	464	exon sense-overlapping	NM_080845	Ftcd	+	76575647	76590338
ENSMUST00000153785	2.99497	0.361196	1.85742	0.172925	0.830383	up	0	0	3	0	0	0	0.0597462	0.0597462	1.21897	0.0597462	0.0597462	0.0597462	Gm12541	Ensembl	chr3	-	37335331	37349740	1441	intronic antisense	NM_008006	Fgf2	+	37348652	37404830
AK042263	2.99497	0.361196	1.85742	0.172925	0.830383	up	0	0	3	0	0	0	0.0597462	0.0597462	1.21897	0.0597462	0.0597462	0.0597462	TUname5602	Genbank	chr3	-	88107115	88112164	4514	natural antisense	NM_001033484	Iqgap3	+	88082050	88121048
AK143294	2.99006	1.01616	1.96952	0.160501	0.830383	up	0	10	0	1	0	0	0.0597462	2.71192	0.0597462	0.626355	0.0597462	0.0597462	TUname59108	Genbank	chr3	-	132792115	132795733	3623	intronic antisense	NM_001163455	Tbck	+	132684143	132838506
ENSMUST00000149687	2.99006	1.01616	1.96952	0.160501	0.830383	up	0	10	0	1	0	0	0.0597462	2.71192	0.0597462	0.626355	0.0597462	0.0597462	2210406O10Rik	Ensembl	chr5	-	36447610	36464821	1198	bidirectional	NM_024478	Grpel1	+	36465184	36474077
AK138037	2.98703	1.04203	1.98475	0.158893	0.830383	up	10	0	0	0	0	1	2.79571	0.0597462	0.0597462	0.0597462	0.0597462	0.718048	TUname51865	Genbank	chr17	-	79932273	79933339	1105	intergenic
AK133341	2.98568	1.01337	1.96174	0.16133	0.830383	up	6	2	2	1	0	0	2.19633	1.10044	0.925468	0.626355	0.0597462	0.0597462	TUname3327	Genbank	chr9	+	37312135	37324436	4071	natural antisense	NM_001081429	Ccdc15	-	37275834	37348392
ENSMUST00000130046	2.98456	2.15845	5.9114	0.0150446	0.830383	up	3	24	8	0	2	2	1.49196	3.83445	2.16039	0.0597462	1.02449	1.1684	Samd4	Ensembl	chr14	+	47087134	47089101	527	exon sense-overlapping	NM_028966	Samd4	+	46882964	47105817
AK140080	2.98295	6.06225	2.28076	0.205504	0.830383	up	26	2	774	27	25	31	4.03439	1.10044	8.37811	3.86587	3.74864	4.30196	TUname22039	Genbank	chr11	-	55504988	55507221	2235	intergenic
2_00014852	2.97596	1.03525	1.98019	0.159373	0.830383	up	4	0	7	0	1	0	1.76674	0.0597462	2.01501	0.0597462	0.621297	0.0597462	XLOC_008670	Lei Sun et al 2012	chr19	+	11386415	11393301	916	intergenic
AK008951	2.97596	1.03525	1.98019	0.159373	0.830383	up	4	0	7	0	1	0	1.76674	0.0597462	2.01501	0.0597462	0.621297	0.0597462	TUname49120	Genbank	chr1	-	40680580	40681459	880	bidirectional	NM_001033289	Slc9a2	+	40681711	40768885
TCONS_00025329	2.97569	1.83613	4.348	0.0370545	0.830383	up	7	6	14	0	3	0	2.37108	2.12037	2.81586	0.0597462	1.33926	0.0597462	XLOC_019305	Alexander et al 2013	chr5	-	110048963	110049562	416	intergenic
AK085263	2.97364	1.49172	3.04372	0.0810523	0.830383	up	4	5	10	1	1	0	1.76674	1.9249	2.41342	0.626355	0.621297	0.0597462	TUname6832	Genbank	chr15	+	75007302	75024410	3502	intergenic
ENSMUST00000124914	2.97012	1.48348	2.99748	0.0833968	0.830383	up	14	3	0	0	1	1	3.21789	1.43038	0.0597462	0.0597462	0.621297	0.718048	Gm15860	Ensembl	chr5	-	123334331	123344437	422	natural antisense	ENSMUST00000120593	Bcl7a	+	123343833	123374082
ENSMUST00000132154	2.96769	1.06014	2.0191	0.155334	0.830383	up	0	1	11	1	0	0	0.0597462	0.671968	2.52504	0.626355	0.0597462	0.0597462	4930432L08Rik	Ensembl	chr5	+	76331237	76341885	1608	natural antisense	uc012dxm.1	Nmu	-	76333494	76363777
ENSMUST00000175709	2.96769	1.06014	2.0191	0.155334	0.830383	up	0	1	11	1	0	0	0.0597462	0.671968	2.52504	0.626355	0.0597462	0.0597462	Pknox1	Ensembl	chr17	+	31591731	31592158	161	exon sense-overlapping	NM_016670	Pknox1	+	31564772	31607693
AK054125	2.96493	1.08699	2.04626	0.152583	0.830383	up	0	4	8	0	0	1	0.0597462	1.69872	2.16039	0.0597462	0.0597462	0.718048	TUname18793	Genbank	chr3	+	89912915	89914053	1139	natural antisense	uc008qag.1	Il6ra	-	89869323	89913162
ENSMUST00000138136	2.94994	1.46991	2.94387	0.0862065	0.830383	up	0	13	5	2	0	0	0.0597462	3.03647	1.67121	1.03213	0.0597462	0.0597462	Gm12272	Ensembl	chr11	+	61527754	61528577	333	intronic antisense	ENSMUST00000108711	Epn2	-	61517248	61579669
AK145314	2.94851	1.46556	2.93139	0.0868753	0.830383	up	5	6	7	0	2	0	1.99747	2.12037	2.01501	0.0597462	1.02449	0.0597462	TUname17203	Genbank	chr6	+	128839749	128843449	730	intergenic
ENSMUST00000140404	2.94595	1.81582	4.17255	0.0410861	0.830383	up	17	6	1	1	1	1	3.4692	2.12037	0.556593	0.626355	0.621297	0.718048	Fance	Ensembl	chr17	+	28317505	28318935	398	exon sense-overlapping	ENSMUST00000156505	Fance	+	28318116	28326449
AK050890	2.94524	1.05262	1.98086	0.159303	0.830383	up	0	0	12	0	1	0	0.0597462	0.0597462	2.62863	0.0597462	0.621297	0.0597462	TUname19914	Genbank	chr12	-	56609612	56610476	864	intergenic
ENSMUST00000129871	2.94317	1.83302	4.23586	0.0395807	0.830383	up	12	4	10	0	2	1	3.02219	1.69872	2.41342	0.0597462	1.02449	0.718048	Ogg1	Ensembl	chr6	+	113326984	113328823	837	exon sense-overlapping	NM_010957	Ogg1	+	113326975	113334186
ENSMUST00000163076	2.94196	1.02726	1.9285	0.164925	0.830383	up	0	4	7	0	1	0	0.0597462	1.69872	2.01501	0.0597462	0.621297	0.0597462	Gm15734	Ensembl	chr5	-	9264221	9266022	1040	bidirectional	NM_172706	9330182L06Rik	+	9266192	9480717
uc029swh.1	2.94196	1.02726	1.9285	0.164925	0.830383	up	0	4	7	0	1	0	0.0597462	1.69872	2.01501	0.0597462	0.621297	0.0597462	AB341359	UCSC_knowngene	chr16	+	17154071	17154097	26	natural antisense	NM_009456	Ube2l3	-	17152014	17201492
TCONS_00006732	2.9405	1.05563	1.95925	0.161596	0.830383	up	4	2	5	0	0	1	1.76674	1.10044	1.67121	0.0597462	0.0597462	0.718048	XLOC_005082	Alexander et al 2013	chr12	+	52413291	52414694	249	intergenic
AK089631	2.93865	1.49355	2.98942	0.0838126	0.830383	up	0	4	16	1	1	0	0.0597462	1.69872	2.98156	0.626355	0.621297	0.0597462	TUname2316	Genbank	chr12	+	69393406	69394904	1498	intergenic
ENSMUST00000133586	2.93414	1.00115	1.89492	0.16865	0.830383	up	0	8	2	1	0	0	0.0597462	2.44625	0.925468	0.626355	0.0597462	0.0597462	Gm14259	Ensembl	chr2	+	170405180	170407175	1239	natural antisense	NM_001164369	Bcas1	-	170346990	170427845
ENSMUST00000182894	2.9301	0.968906	1.86123	0.172486	0.830383	up	9	0	0	0	1	0	2.66757	0.0597462	0.0597462	0.0597462	0.621297	0.0597462	Gm26968	Ensembl	chr4	+	83743676	83744157	481	intron sense-overlapping	uc008tlf.1	4930473A06Rik	+	83695928	83864670
ENSMUST00000182145	2.9301	0.968906	1.86123	0.172486	0.830383	up	9	0	0	0	1	0	2.66757	0.0597462	0.0597462	0.0597462	0.621297	0.0597462	Gm27045	Ensembl	chr8	+	121542121	121543481	1360	natural antisense	ENSMUST00000182460	1700018B08Rik	-	121531813	121544320
ENSMUST00000127839	2.92955	0.998351	1.88702	0.169541	0.830383	up	6	0	4	1	0	0	2.19633	0.0597462	1.46274	0.626355	0.0597462	0.0597462	P2rx3	Ensembl	chr2	-	85032053	85033194	688	intron sense-overlapping	NM_145526	P2rx3	-	84996551	85035834
ENSMUST00000098926	2.92791	1.07652	1.98469	0.158899	0.830383	up	2	0	10	0	0	1	1.15223	0.0597462	2.41342	0.0597462	0.0597462	0.718048	Gm10701	Ensembl	chr9	+	24341656	24418709	906	intronic antisense	ENSMUST00000142064	Dpy19l1	-	24411777	24503140
BC049356	2.9279	1.51045	2.97982	0.084311	0.830383	up	0	18	0	0	0	2	0.0597462	3.45412	0.0597462	0.0597462	0.0597462	1.1684	TUname37471	Genbank	chr19	+	57323601	57331222	1692	intergenic
AK044386	2.9279	1.51045	2.97982	0.084311	0.830383	up	0	18	0	0	0	2	0.0597462	3.45412	0.0597462	0.0597462	0.0597462	1.1684	TUname29988	Genbank	chr17	+	71755148	71756762	1615	intergenic
ENSMUST00000180261	2.9231	0.997715	1.87981	0.170358	0.830383	up	2	5	3	1	0	0	1.15223	1.9249	1.21897	0.626355	0.0597462	0.0597462	Ccdc141	Ensembl	chr2	-	77015050	77022696	363	exon sense-overlapping	ENSMUST00000049544	Ccdc141	-	77009901	77170635
ENSMUST00000159476	2.92226	1.5122	2.99164	0.0836977	0.830383	up	1	5	14	1	0	1	0.707016	1.9249	2.81586	0.626355	0.0597462	0.718048	Spata13	Ensembl	chr14	+	60702952	60706874	331	exon sense-overlapping	NM_001033272	Spata13	+	60634728	60764556
ENSMUST00000125994	2.92164	1.05028	1.92827	0.164951	0.830383	up	5	0	6	0	0	1	1.99747	0.0597462	1.85333	0.0597462	0.0597462	0.718048	Cp	Ensembl	chr3	+	19974759	19980741	814	exon sense-overlapping	ENSMUST00000108329	Cp	+	19957053	20007609
ENSMUST00000126936	2.91893	1.48449	2.93295	0.0867912	0.830383	up	2	0	18	0	2	0	1.15223	0.0597462	3.13018	0.0597462	1.02449	0.0597462	4930418C01Rik	Ensembl	chr19	+	24416008	24430329	684	intronic antisense	ENSMUST00000112673	Pip5k1b	-	24294793	24555842
ENSMUST00000160592	2.91629	1.02293	1.87567	0.170829	0.830383	up	8	0	2	0	0	1	2.52693	0.0597462	0.925468	0.0597462	0.0597462	0.718048	Hes1	Ensembl	chr16	+	30064383	30065569	333	exon sense-overlapping	NM_008235	Hes1	+	30065356	30067796
ENSMUST00000123674	2.91602	0.967158	1.84369	0.174522	0.830383	up	8	1	0	1	0	0	2.52693	0.671968	0.0597462	0.626355	0.0597462	0.0597462	Ttc16	Ensembl	chr2	-	32772759	32775587	1612	exon sense-overlapping	ENSMUST00000161089	Ttc16	-	32762262	32775330
ENSMUST00000132192	2.91501	2.10276	5.39204	0.0202304	0.830383	up	21	5	6	2	0	2	3.74795	1.9249	1.85333	1.03213	0.0597462	1.1684	Cthrc1	Ensembl	chr15	+	39077080	39081619	419	exon sense-overlapping	NM_026778	Cthrc1	+	39076931	39087119
ENSMUST00000128389	2.91228	0.964747	1.83857	0.175121	0.830383	up	7	2	0	0	1	0	2.37108	1.10044	0.0597462	0.0597462	0.621297	0.0597462	Mfng	Ensembl	chr15	-	78766873	78771894	319	exon sense-overlapping	NM_008595	Mfng	-	78755882	78773445
NR_045362	2.90859	1.02023	1.88517	0.16975	0.830383	up	0	3	8	1	0	0	0.0597462	1.43038	2.16039	0.626355	0.0597462	0.0597462	Gm6602	RefSeq	chr3	+	111881902	112082001	1927	intergenic
ENSMUST00000125744	2.90617	1.8292	4.11334	0.0425483	0.830383	up	6	16	3	0	1	2	2.19633	3.30125	1.21897	0.0597462	0.621297	1.1684	Katnal2	Ensembl	chr18	-	77001692	77012031	768	exon sense-overlapping	uc008fqv.1	Katnal2	-	76977148	77002549
ENSMUST00000147691	2.90377	1.02163	1.86155	0.172449	0.830383	up	0	10	0	0	0	1	0.0597462	2.71192	0.0597462	0.0597462	0.0597462	0.718048	Gm12534	Ensembl	chr3	+	37231332	37232469	469	natural antisense	NM_021782	Il21	-	37222758	37232618
ENSMUST00000124983	2.89708	0.988478	1.84454	0.174423	0.830383	up	5	0	5	0	1	0	1.99747	0.0597462	1.67121	0.0597462	0.621297	0.0597462	Smc4	Ensembl	chr3	+	69016695	69019327	496	exon sense-overlapping	uc008plz.1	Smc4	+	69004971	69019325
ENSMUST00000130330	2.89021	1.43024	2.74092	0.0978109	0.830383	up	8	3	6	2	0	0	2.52693	1.43038	1.85333	1.03213	0.0597462	0.0597462	C1d	Ensembl	chr11	+	17263620	17266560	416	exon sense-overlapping	NM_020558	C1d	+	17257617	17269176
ENSMUST00000148130	2.88671	0.959474	1.80569	0.179029	0.830383	up	8	0	1	1	0	0	2.52693	0.0597462	0.556593	0.626355	0.0597462	0.0597462	Pttg1	Ensembl	chr11	-	43424621	43426213	388	exon sense-overlapping	ENSMUST00000121638	Pttg1	-	43420273	43425963
BG084821	2.8863	1.42953	2.73308	0.0982921	0.830383	up	4	8	5	2	0	0	1.76674	2.44625	1.67121	1.03213	0.0597462	0.0597462	TUname63560	Genbank	chr9	+	95331598	95332184	586	intergenic
TCONS_00009481	2.88524	0.958511	1.80455	0.179166	0.830383	up	4	5	0	0	1	0	1.76674	1.9249	0.0597462	0.0597462	0.621297	0.0597462	TUname20644	Alexander et al 2013	chr14	+	19043598	19044154	50	intergenic
ENSMUST00000156105	2.88284	0.957064	1.80049	0.179655	0.830383	up	7	1	1	0	1	0	2.37108	0.671968	0.556593	0.0597462	0.621297	0.0597462	Srek1ip1	Ensembl	chr13	+	104817238	104838669	1806	exon sense-overlapping	NM_026075	Srek1ip1	+	104817238	104838659
ENSMUST00000131344	2.8822	1.01477	1.8322	0.175871	0.830383	up	4	4	2	0	0	1	1.76674	1.69872	0.925468	0.0597462	0.0597462	0.718048	Pfkfb4	Ensembl	chr9	+	108992015	109030712	1841	exon sense-overlapping	uc009rrk.1	Pfkfb4	+	108991901	109032225
ENSMUST00000163489	2.88005	1.85639	4.13847	0.0419212	0.830383	up	12	1	14	0	0	3	3.02219	0.671968	2.81586	0.0597462	0.0597462	1.51111	Pla2g7	Ensembl	chr17	+	43568714	43607636	1374	exon sense-overlapping	ENSMUST00000169694	Pla2g7	+	43568672	43607263
ENSMUST00000150811	2.87825	2.06447	5.11487	0.0237234	0.830383	up	10	12	10	2	1	1	2.79571	2.93618	2.41342	1.03213	0.621297	0.718048	Lrig1	Ensembl	chr6	-	94626449	94655525	700	exon sense-overlapping	uc012epm.1	Lrig1	-	94604909	94700145
ENSMUST00000136855	2.87614	0.956433	1.7932	0.18054	0.830383	up	3	6	0	0	1	0	1.49196	2.12037	0.0597462	0.0597462	0.621297	0.0597462	Pomgnt1	Ensembl	chr4	+	116137251	116159849	3448	natural antisense	NM_026547	Lurap1	-	116136727	116144616
AK047761	2.867	0.954356	1.78184	0.181926	0.830383	up	2	7	0	0	1	0	1.15223	2.29249	0.0597462	0.0597462	0.621297	0.0597462	TUname23076	Genbank	chr8	-	106849301	106851409	2123	natural antisense	uc012gjv.1	Tmco7	+	106683067	106851439
ENSMUST00000133810	2.86106	1.79899	3.91126	0.0479658	0.830383	up	0	13	13	2	0	1	0.0597462	3.03647	2.72528	1.03213	0.0597462	0.718048	Slc39a8	Ensembl	chr3	+	135884159	135888568	4212	exon sense-overlapping	NM_001135150	Slc39a8	+	135825789	135888572
ENSMUST00000131474	2.85782	1.47262	2.78192	0.0953362	0.830383	up	1	5	13	0	1	1	0.707016	1.9249	2.72528	0.0597462	0.621297	0.718048	Tceanc2	Ensembl	chr4	-	107176615	107177668	113	exon sense-overlapping	ENSMUST00000058585	Tceanc2	-	107139576	107178282
ENSMUST00000119959	2.85624	1.00866	1.79954	0.179771	0.830383	up	1	7	2	0	0	1	0.707016	2.29249	0.925468	0.0597462	0.0597462	0.718048	Rpl31-ps6	Ensembl	chr5	+	123466508	123466886	378	intergenic
AK156140	2.85589	1.00521	1.81711	0.17766	0.830383	up	0	1	10	0	1	0	0.0597462	0.671968	2.41342	0.0597462	0.621297	0.0597462	TUname35088	Genbank	chr9	-	24284872	24287841	2970	natural antisense	ENSMUST00000154644	Npsr1	+	24283432	24313343
ENSMUST00000141550	2.85351	0.979254	1.7895	0.18099	0.830383	up	4	0	6	1	0	0	1.76674	0.0597462	1.85333	0.626355	0.0597462	0.0597462	Pxmp2	Ensembl	chr5	-	110280799	110286002	427	exon sense-overlapping	NM_008993	Pxmp2	-	110274285	110286168
ENSMUST00000156943	2.85351	0.979254	1.7895	0.18099	0.830383	up	4	0	6	1	0	0	1.76674	0.0597462	1.85333	0.626355	0.0597462	0.0597462	1700022K14Rik	Ensembl	chr5	-	65761444	65763357	235	bidirectional	ENSMUST00000087264	N4bp2	+	65764119	65826650
TCONS_00022780	2.85015	0.951162	1.7603	0.184589	0.830383	up	4	4	1	1	0	0	1.76674	1.69872	0.556593	0.626355	0.0597462	0.0597462	XLOC_016914	Alexander et al 2013	chr4	+	131157053	131166381	8252	intergenic
TCONS_00008265	2.8444	0.97722	1.77828	0.182363	0.830383	up	3	1	6	1	0	0	1.49196	0.671968	1.85333	0.626355	0.0597462	0.0597462	XLOC_006647	Alexander et al 2013	chr13	-	53838748	53850087	1127	intergenic
ENSMUST00000143320	2.84364	0.947303	1.75094	0.185761	0.830383	up	6	1	2	0	1	0	2.19633	0.671968	0.925468	0.0597462	0.621297	0.0597462	Tubgcp4	Ensembl	chr2	+	121183612	121184803	548	exon sense-overlapping	NM_153387	Tubgcp4	+	121171205	121197118
AK015849	2.84043	2.43855	7.19854	0.00729928	0.812477	up	32	0	11	6	0	0	4.31664	0.0597462	2.52504	2.01812	0.0597462	0.0597462	TUname11100	Genbank	chr18	-	82386876	82387586	710	intergenic
ENSMUST00000144748	2.83998	1.02958	1.80219	0.17945	0.830383	up	2	1	8	0	0	1	1.15223	0.671968	2.16039	0.0597462	0.0597462	0.718048	Hsd3b7	Ensembl	chr7	+	127800603	127803802	2286	exon sense-overlapping	ENSMUST00000106272	Hsd3b7	+	127800613	127803802
ENSMUST00000147123	2.83743	0.974827	1.74974	0.185912	0.830383	up	9	0	0	0	0	1	2.66757	0.0597462	0.0597462	0.0597462	0.0597462	0.718048	Arid5a	Ensembl	chr1	+	36315991	36318136	563	exon sense-overlapping	ENSMUST00000115029	Arid5a	+	36307768	36322988
ENSMUST00000136656	2.8374	1.4101	2.60919	0.106249	0.830383	up	4	5	8	1	1	0	1.76674	1.9249	2.16039	0.626355	0.621297	0.0597462	Znhit3	Ensembl	chr11	-	84911468	84916366	725	exon sense-overlapping	NM_001005223	Znhit3	-	84910954	84916356
TCONS_00010978	2.82863	1.81367	3.87468	0.0490219	0.830383	up	4	4	19	1	0	2	1.76674	1.69872	3.19911	0.626355	0.0597462	1.1684	XLOC_008626	Alexander et al 2013	chr15	-	78553321	78555142	1710	intergenic
ENSMUST00000141873	2.82813	1.4474	2.66905	0.102319	0.830383	up	6	1	11	1	0	1	2.19633	0.671968	2.52504	0.626355	0.0597462	0.718048	Srp72	Ensembl	chr5	+	76984094	76995146	1220	exon sense-overlapping	NM_025691	Srp72	+	76974700	76999935
uc007hvh.1	2.82733	1.44642	2.66633	0.102495	0.830383	up	2	6	10	0	1	1	1.15223	2.12037	2.41342	0.0597462	0.621297	0.718048	AK217604	UCSC_knowngene	chr11	+	4765851	4766251	400	natural antisense	NM_010898	Nf2	-	4765844	4849544
ENSMUST00000121481	2.8263	0.997861	1.77984	0.182171	0.830383	up	0	0	11	0	1	0	0.0597462	0.0597462	2.52504	0.0597462	0.621297	0.0597462	Gm13162	Ensembl	chr4	+	147125255	147125816	454	intergenic
AK047730	2.81018	0.967352	1.73539	0.187726	0.830383	up	2	1	7	0	1	0	1.15223	0.671968	2.01501	0.0597462	0.621297	0.0597462	TUname18942	Genbank	chr16	-	59642028	59643878	1852	intergenic
ENSMUST00000162949	2.8063	1.38784	2.49192	0.114435	0.830383	up	15	0	0	0	1	1	3.30661	0.0597462	0.0597462	0.0597462	0.621297	0.718048	BC055324	Ensembl	chr1	-	163989737	163994541	343	exon sense-overlapping	uc007dhs.1	BC055324	-	163945992	163990759
ENSMUST00000132042	2.80576	1.71799	3.51733	0.0607327	0.830383	up	7	8	8	0	3	0	2.37108	2.44625	2.16039	0.0597462	1.33926	0.0597462	Mrrf	Ensembl	chr2	+	36136633	36147919	392	natural antisense	NM_026434	Rbm18	-	36116078	36136704
ENSMUST00000118081	2.805	1.46287	2.65491	0.103233	0.830383	up	5	4	9	0	0	2	1.99747	1.69872	2.29245	0.0597462	0.0597462	1.1684	Gm6335	Ensembl	chrX	+	112162553	112163747	1194	intergenic
ENSMUST00000135723	2.79844	0.993638	1.72635	0.18888	0.830383	up	1	5	4	0	0	1	0.707016	1.9249	1.46274	0.0597462	0.0597462	0.718048	Cryz	Ensembl	chr3	+	154597221	154618598	795	exon sense-overlapping	ENSMUST00000140644	Cryz	+	154597351	154611438
ENSMUST00000155641	2.79357	1.35735	2.41683	0.12004	0.830383	up	12	0	3	0	2	0	3.02219	0.0597462	1.21897	0.0597462	1.02449	0.0597462	Gm13997	Ensembl	chr2	-	120244920	120245598	336	exon sense-overlapping	NM_177845	Pla2g4e	-	120166411	120245335
ENSMUST00000124897	2.79147	0.963287	1.71289	0.190613	0.830383	up	0	3	7	0	1	0	0.0597462	1.43038	2.01501	0.0597462	0.621297	0.0597462	Gm16266	Ensembl	chr7	-	18993552	19001222	560	natural antisense	ENSMUST00000131087	Mypop	+	18991318	19001766
ENSMUST00000146046	2.79038	1.69047	3.38878	0.0656441	0.830383	up	11	10	0	2	1	0	2.91339	2.71192	0.0597462	1.03213	0.621297	0.0597462	Gm16358	Ensembl	chr2	+	175771852	175772062	210	intergenic
ENSMUST00000163188	2.78628	0.963611	1.70686	0.191396	0.830383	up	0	3	7	1	0	0	0.0597462	1.43038	2.01501	0.626355	0.0597462	0.0597462	Prtn3	Ensembl	chr10	+	79874475	79883041	843	exon sense-overlapping	NM_011178	Prtn3	+	79879666	79883172
ENSMUST00000142936	2.78576	1.37354	2.44394	0.117982	0.830383	up	4	6	6	0	2	0	1.76674	2.12037	1.85333	0.0597462	1.02449	0.0597462	Mtus1	Ensembl	chr8	-	41018962	41054783	780	exon sense-overlapping	uc009lnm.1	Mtus1	-	40990911	41084908
ENSMUST00000135098	2.7845	1.73436	3.50953	0.0610192	0.830383	up	0	19	4	2	0	1	0.0597462	3.52489	1.46274	1.03213	0.0597462	0.718048	Arhgef6	Ensembl	chrX	-	57335903	57338506	1301	exon sense-overlapping	NM_152801	Arhgef6	-	57231484	57338729
ENSMUST00000161093	2.7828	1.35722	2.39931	0.121391	0.830383	up	8	5	2	2	0	0	2.52693	1.9249	0.925468	1.03213	0.0597462	0.0597462	Polr3g	Ensembl	chr13	-	81693845	81710956	424	exon sense-overlapping	ENSMUST00000161920	Polr3g	-	81694282	81710945
AK131720	2.78224	1.35369	2.39167	0.121986	0.830383	up	10	2	3	0	2	0	2.79571	1.10044	1.21897	0.0597462	1.02449	0.0597462	TUname24229	Genbank	chr13	-	35957530	35965008	993	intergenic
AK131775	2.77492	0.931319	1.66693	0.196673	0.830383	up	2	4	3	0	1	0	1.15223	1.69872	1.21897	0.0597462	0.621297	0.0597462	TUname7084	Genbank	chr17	+	14203771	14204094	324	natural antisense	NM_172826	Dact2	-	14195229	14203831
ENSMUST00000181569	2.77397	0.96027	1.67235	0.195946	0.830383	up	2	7	0	0	0	1	1.15223	2.29249	0.0597462	0.0597462	0.0597462	0.718048	Gm26808	Ensembl	chr5	-	109922648	109923481	411	natural antisense	ENSMUST00000112544	Gm15446	+	109923399	109943936
ENSMUST00000145490	2.77229	0.929863	1.66276	0.197234	0.830383	up	5	0	4	0	1	0	1.99747	0.0597462	1.46274	0.0597462	0.621297	0.0597462	G6pc3	Ensembl	chr11	+	102192018	102193598	848	exon sense-overlapping	NM_175935	G6pc3	+	102189698	102194081
AK134272	2.76597	1.47849	2.63144	0.104769	0.830383	up	0	0	20	0	0	2	0.0597462	0.0597462	3.26491	0.0597462	0.0597462	1.1684	TUname48264	Genbank	chr8	+	49521423	49522408	986	intergenic
ENSMUST00000159714	2.7659	1.43992	2.55437	0.109992	0.830383	up	0	1	18	0	1	1	0.0597462	0.671968	3.13018	0.0597462	0.621297	0.718048	Fyb	Ensembl	chr15	+	6579891	6620608	2170	exon sense-overlapping	uc007vdk.1	Fyb	+	6579870	6663312
TCONS_00017184	2.76477	0.958134	1.68029	0.194889	0.830383	up	1	1	8	1	0	0	0.707016	0.671968	2.16039	0.626355	0.0597462	0.0597462	XLOC_012803	Alexander et al 2013	chr2	+	36192709	36193280	227	intergenic
TCONS_00009804	2.76473	0.958192	1.66129	0.197432	0.830383	up	1	8	0	0	0	1	0.707016	2.44625	0.0597462	0.0597462	0.0597462	0.718048	XLOC_007900	Alexander et al 2013	chr14	-	120121248	120125567	742	intergenic
ENSMUST00000150738	2.76044	0.955779	1.67502	0.19559	0.830383	up	0	2	8	0	1	0	0.0597462	1.10044	2.16039	0.0597462	0.621297	0.0597462	Abca4	Ensembl	chr3	+	122074455	122087931	1124	exon sense-overlapping	NM_007378	Abca4	+	122044459	122180061
ENSMUST00000153742	2.76044	0.955779	1.67502	0.19559	0.830383	up	0	2	8	0	1	0	0.0597462	1.10044	2.16039	0.0597462	0.621297	0.0597462	Atg4a	Ensembl	chrX	+	140956949	140992837	340	exon sense-overlapping	ENSMUST00000112971	Atg4a	+	140956906	141164270
AK134114_2	2.76032	0.8988	1.62113	0.202937	0.830383	up	8	0	0	1	0	0	2.52693	0.0597462	0.0597462	0.626355	0.0597462	0.0597462
CA587991	2.76032	0.8988	1.62113	0.202937	0.830383	up	8	0	0	1	0	0	2.52693	0.0597462	0.0597462	0.626355	0.0597462	0.0597462	TUname63821	Genbank	chr9	+	23561728	23561982	249	intergenic
ENSMUST00000031158	2.75974	0.955297	1.65334	0.198507	0.830383	up	7	0	2	0	0	1	2.37108	0.0597462	0.925468	0.0597462	0.0597462	0.718048	Ppat	Ensembl	chr5	-	76915043	76951165	2057	exon sense-overlapping	NM_172146	Ppat	-	76913248	76951578
ENSMUST00000149218	2.75726	0.291745	1.597	0.206332	0.830383	up	2	0	0	0	0	0	1.15223	0.0597462	0.0597462	0.0597462	0.0597462	0.0597462	Fam3a	Ensembl	chrX	-	74386631	74393103	941	exon sense-overlapping	ENSMUST00000122894	Fam3a	-	74386421	74393255
ENSMUST00000150001	2.75726	0.291745	1.597	0.206332	0.830383	up	2	0	0	0	0	0	1.15223	0.0597462	0.0597462	0.0597462	0.0597462	0.0597462	Dpep2	Ensembl	chr8	-	105987746	105991722	1523	exon sense-overlapping	uc009new.1	Dpep2	-	105985056	105991725
AK017335	2.75726	0.291745	1.597	0.206332	0.830383	up	2	0	0	0	0	0	1.15223	0.0597462	0.0597462	0.0597462	0.0597462	0.0597462	TUname31840	Genbank	chr14	+	23519661	23520844	1184	intronic antisense	NM_001253366	Kcnma1	-	23298693	24004205
ENSMUST00000136951	2.75726	0.291745	1.597	0.206332	0.830383	up	2	0	0	0	0	0	1.15223	0.0597462	0.0597462	0.0597462	0.0597462	0.0597462	Phactr1	Ensembl	chr13	+	43132996	43134242	380	exon sense-overlapping	NM_001005740	Phactr1	+	42709580	43138512
ENSMUST00000174534	2.75726	0.291745	1.597	0.206332	0.830383	up	2	0	0	0	0	0	1.15223	0.0597462	0.0597462	0.0597462	0.0597462	0.0597462	Sfta2	Ensembl	chr17	+	35601577	35650565	694	exon sense-overlapping	ENSMUST00000174521	Sfta2	+	35601548	35650567
ENSMUST00000119137	2.75726	0.291745	1.597	0.206332	0.830383	up	2	0	0	0	0	0	1.15223	0.0597462	0.0597462	0.0597462	0.0597462	0.0597462	Gm15497	Ensembl	chr5	+	138610738	138611289	551	intronic antisense	NM_013844	Zfp68	-	138603651	138619743
AK156395	2.75726	0.291745	1.597	0.206332	0.830383	up	2	0	0	0	0	0	1.15223	0.0597462	0.0597462	0.0597462	0.0597462	0.0597462	TUname44888	Genbank	chr16	-	13293624	13297423	3799	intronic antisense	NM_001122667	Mkl2	+	13256480	13417529
ENSMUST00000132681	2.75726	0.291745	1.597	0.206332	0.830383	up	2	0	0	0	0	0	1.15223	0.0597462	0.0597462	0.0597462	0.0597462	0.0597462	Sh3rf2	Ensembl	chr18	+	42141896	42156126	836	exon sense-overlapping	NM_172966	Sh3rf2	+	42053709	42158695
uc012bdo.1	2.75726	0.291745	1.597	0.206332	0.830383	up	2	0	0	0	0	0	1.15223	0.0597462	0.0597462	0.0597462	0.0597462	0.0597462	Csf1r	UCSC_knowngene	chr18	+	61105780	61131139	3803	exon sense-overlapping	NM_001037859	Csf1r	+	61105571	61131139
AK155278	2.75726	0.291745	1.597	0.206332	0.830383	up	2	0	0	0	0	0	1.15223	0.0597462	0.0597462	0.0597462	0.0597462	0.0597462	TUname377	Genbank	chr2	-	38533105	38535707	2598	intronic antisense	NM_001159631	Nek6	+	38511875	38587490
ENSMUST00000135060	2.75726	0.291745	1.597	0.206332	0.830383	up	2	0	0	0	0	0	1.15223	0.0597462	0.0597462	0.0597462	0.0597462	0.0597462	Lgals8	Ensembl	chr13	-	12452737	12455014	441	exon sense-overlapping	ENSMUST00000124888	Lgals8	-	12439414	12464944
ENSMUST00000163406	2.75726	0.291745	1.597	0.206332	0.830383	up	2	0	0	0	0	0	1.15223	0.0597462	0.0597462	0.0597462	0.0597462	0.0597462	Gm3978	Ensembl	chr7	-	7948361	7964378	2512	intergenic
ENSMUST00000143381	2.75726	0.291745	1.597	0.206332	0.830383	up	2	0	0	0	0	0	1.15223	0.0597462	0.0597462	0.0597462	0.0597462	0.0597462	Slc12a4	Ensembl	chr8	-	105960459	105966074	461	exon sense-overlapping	NM_001253804	Slc12a4	-	105943589	105966115
AK015372	2.75726	0.291745	1.597	0.206332	0.830383	up	2	0	0	0	0	0	1.15223	0.0597462	0.0597462	0.0597462	0.0597462	0.0597462	TUname51880	Genbank	chr2	-	152683407	152685135	1728	natural antisense	NM_001159553	H13	+	152669460	152685146
ENSMUST00000122167	2.75726	0.291745	1.597	0.206332	0.830383	up	2	0	0	0	0	0	1.15223	0.0597462	0.0597462	0.0597462	0.0597462	0.0597462	Gm16061	Ensembl	chr5	-	135698162	135699019	857	intronic antisense	NM_008898	Por	+	135689213	135735325
ENSMUST00000143141	2.75726	0.291745	1.597	0.206332	0.830383	up	2	0	0	0	0	0	1.15223	0.0597462	0.0597462	0.0597462	0.0597462	0.0597462	Arhgef16	Ensembl	chr4	-	154278485	154282499	2671	exon sense-overlapping	uc012dqk.1	Arhgef16	-	154278469	154301663
uc009dta.1	2.75726	0.291745	1.597	0.206332	0.830383	up	2	0	0	0	0	0	1.15223	0.0597462	0.0597462	0.0597462	0.0597462	0.0597462	AK019772	UCSC_knowngene	chr6	-	125010180	125049853	357	natural antisense	ENSMUST00000112424	Zfp384	+	125010391	125037637
ENSMUST00000119815	2.75726	0.291745	1.597	0.206332	0.830383	up	2	0	0	0	0	0	1.15223	0.0597462	0.0597462	0.0597462	0.0597462	0.0597462	Gm14472	Ensembl	chr2	+	153413848	153414130	282	intronic antisense	NM_001134300	8430427H17Rik	-	153407460	153529971
ENSMUST00000162480	2.75726	0.291745	1.597	0.206332	0.830383	up	2	0	0	0	0	0	1.15223	0.0597462	0.0597462	0.0597462	0.0597462	0.0597462	Traf3ip3	Ensembl	chr1	-	193184573	193187172	435	exon sense-overlapping	NM_153137	Traf3ip3	-	193175503	193201546
uc029uvc.1	2.75726	0.291745	1.597	0.206332	0.830383	up	2	0	0	0	0	0	1.15223	0.0597462	0.0597462	0.0597462	0.0597462	0.0597462	DQ702720	UCSC_knowngene	chr4	-	62220915	62220950	35	intergenic
ENSMUST00000132690	2.75726	0.291745	1.597	0.206332	0.830383	up	2	0	0	0	0	0	1.15223	0.0597462	0.0597462	0.0597462	0.0597462	0.0597462	Gm12827	Ensembl	chr4	+	117496451	117500602	660	natural antisense	uc008uir.1	Rnf220	-	117489164	117496915
ENSMUST00000128049	2.75726	0.291745	1.597	0.206332	0.830383	up	2	0	0	0	0	0	1.15223	0.0597462	0.0597462	0.0597462	0.0597462	0.0597462	Cln3	Ensembl	chr7	-	126583321	126584786	414	exon sense-overlapping	ENSMUST00000084589	Cln3	-	126571206	126585817
uc009qfz.1	2.75726	0.291745	1.597	0.206332	0.830383	up	2	0	0	0	0	0	1.15223	0.0597462	0.0597462	0.0597462	0.0597462	0.0597462	DQ717301	UCSC_knowngene	chr9	-	67694108	67694169	61	intergenic
ENSMUST00000135289	2.75726	0.291745	1.597	0.206332	0.830383	up	2	0	0	0	0	0	1.15223	0.0597462	0.0597462	0.0597462	0.0597462	0.0597462	Wdr53	Ensembl	chr16	+	32247400	32252160	566	exon sense-overlapping	NM_026898	Wdr53	+	32247252	32257083
AK052853	2.75726	0.291745	1.597	0.206332	0.830383	up	2	0	0	0	0	0	1.15223	0.0597462	0.0597462	0.0597462	0.0597462	0.0597462	TUname26160	Genbank	chr4	-	147944154	147946259	2107	natural antisense	NM_029841	2510039O18Rik	+	147940894	147947314
TCONS_00009477	2.75726	0.291745	1.597	0.206332	0.830383	up	2	0	0	0	0	0	1.15223	0.0597462	0.0597462	0.0597462	0.0597462	0.0597462	XLOC_007009	Alexander et al 2013	chr14	+	14681375	14682854	326	intergenic
ENSMUST00000166606	2.75726	0.291745	1.597	0.206332	0.830383	up	2	0	0	0	0	0	1.15223	0.0597462	0.0597462	0.0597462	0.0597462	0.0597462	Gm17092	Ensembl	chr5	+	99977685	99978858	698	natural antisense	ENSMUST00000112939	Hnrnpd	-	99960997	99978917
ENSMUST00000154200	2.75726	0.291745	1.597	0.206332	0.830383	up	2	0	0	0	0	0	1.15223	0.0597462	0.0597462	0.0597462	0.0597462	0.0597462	Hdac6	Ensembl	chrX	-	7943398	7947159	718	exon sense-overlapping	NM_010413	Hdac6	-	7930121	7947889
uc009qhh.1	2.75726	0.291745	1.597	0.206332	0.830383	up	2	0	0	0	0	0	1.15223	0.0597462	0.0597462	0.0597462	0.0597462	0.0597462	DQ694442	UCSC_knowngene	chr9	-	67706414	67706467	53	intergenic
ENSMUST00000184657	2.75726	0.291745	1.597	0.206332	0.830383	up	2	0	0	0	0	0	1.15223	0.0597462	0.0597462	0.0597462	0.0597462	0.0597462	C2cd3	Ensembl	chr7	+	100451337	100454789	639	exon sense-overlapping	NM_001017985	C2cd3	+	100372232	100470159
AK077805	2.75726	0.291745	1.597	0.206332	0.830383	up	2	0	0	0	0	0	1.15223	0.0597462	0.0597462	0.0597462	0.0597462	0.0597462	TUname46662	Genbank	chr1	-	92820957	92837896	1050	intronic antisense	NM_016696	Gpc1	+	92831685	92860196
ENSMUST00000136069	2.75726	0.291745	1.597	0.206332	0.830383	up	2	0	0	0	0	0	1.15223	0.0597462	0.0597462	0.0597462	0.0597462	0.0597462	Vrk3	Ensembl	chr7	+	44752112	44759407	737	exon sense-overlapping	NM_133945	Vrk3	+	44748628	44777514
AK015830	2.75726	0.291745	1.597	0.206332	0.830383	up	2	0	0	0	0	0	1.15223	0.0597462	0.0597462	0.0597462	0.0597462	0.0597462	TUname16983	Genbank	chr8	-	56465623	56484968	572	intergenic
ENSMUST00000151395	2.75726	0.291745	1.597	0.206332	0.830383	up	2	0	0	0	0	0	1.15223	0.0597462	0.0597462	0.0597462	0.0597462	0.0597462	Kif18a	Ensembl	chr2	+	109280839	109307501	2176	exon sense-overlapping	NM_139303	Kif18a	+	109280737	109341746
uc007caq.2	2.75726	0.291745	1.597	0.206332	0.830383	up	2	0	0	0	0	0	1.15223	0.0597462	0.0597462	0.0597462	0.0597462	0.0597462	DQ690636	UCSC_knowngene	chr1	-	91404731	91404837	106	intergenic
ENSMUST00000132443	2.75726	0.291745	1.597	0.206332	0.830383	up	2	0	0	0	0	0	1.15223	0.0597462	0.0597462	0.0597462	0.0597462	0.0597462	Ppp1r1b	Ensembl	chr11	+	98350854	98357788	1191	exon sense-overlapping	ENSMUST00000150762	Ppp1r1b	+	98349995	98357794
ENSMUST00000132483	2.75726	0.291745	1.597	0.206332	0.830383	up	2	0	0	0	0	0	1.15223	0.0597462	0.0597462	0.0597462	0.0597462	0.0597462	Wdr62	Ensembl	chr7	-	30245431	30251875	791	exon sense-overlapping	NM_146186	Wdr62	-	30240137	30280421
NR_045328	2.75726	0.291745	1.597	0.206332	0.830383	up	2	0	0	0	0	0	1.15223	0.0597462	0.0597462	0.0597462	0.0597462	0.0597462	A330009N23Rik	RefSeq	chr15	-	101221190	101225186	1365	intronic antisense	NM_019518	Grasp	+	101224206	101232756
AK155829	2.75726	0.291745	1.597	0.206332	0.830383	up	2	0	0	0	0	0	1.15223	0.0597462	0.0597462	0.0597462	0.0597462	0.0597462	TUname58389	Genbank	chr5	+	113941762	113942603	841	natural antisense	ENSMUST00000077689	Ssh1	-	113942191	113989743
ENSMUST00000143196	2.75726	0.291745	1.597	0.206332	0.830383	up	2	0	0	0	0	0	1.15223	0.0597462	0.0597462	0.0597462	0.0597462	0.0597462	Cdk11b	Ensembl	chr4	+	155647367	155648292	411	exon sense-overlapping	NM_007661	Cdk11b	+	155624868	155649932
ENSMUST00000161664	2.75726	0.291745	1.597	0.206332	0.830383	up	2	0	0	0	0	0	1.15223	0.0597462	0.0597462	0.0597462	0.0597462	0.0597462	9530072K05Rik	Ensembl	chr17	+	44710221	44713925	818	intronic antisense	NM_001271630	Runx2	-	44603988	44736176
ENSMUST00000159396	2.75726	0.291745	1.597	0.206332	0.830383	up	2	0	0	0	0	0	1.15223	0.0597462	0.0597462	0.0597462	0.0597462	0.0597462	Kif6	Ensembl	chr17	+	49738752	49755390	498	exon sense-overlapping	NM_177052	Kif6	+	49615171	49909847
AK089824	2.75726	0.291745	1.597	0.206332	0.830383	up	2	0	0	0	0	0	1.15223	0.0597462	0.0597462	0.0597462	0.0597462	0.0597462	TUname8388	Genbank	chr1	+	24441446	24444073	2627	intronic antisense	NM_007733	Col19a1	-	24257682	24587437
ENSMUST00000154648	2.75726	0.291745	1.597	0.206332	0.830383	up	2	0	0	0	0	0	1.15223	0.0597462	0.0597462	0.0597462	0.0597462	0.0597462	Gpatch3	Ensembl	chr4	+	133579703	133583010	468	exon sense-overlapping	uc012dmn.1	Gpatch3	+	133574744	133584242
ENSMUST00000161809	2.75726	0.291745	1.597	0.206332	0.830383	up	2	0	0	0	0	0	1.15223	0.0597462	0.0597462	0.0597462	0.0597462	0.0597462	Oas1g	Ensembl	chr5	-	120876943	120879603	769	exon sense-overlapping	NM_011852	Oas1g	-	120876141	120887598
AY974564	2.75726	0.291745	1.597	0.206332	0.830383	up	2	0	0	0	0	0	1.15223	0.0597462	0.0597462	0.0597462	0.0597462	0.0597462	TUname44666	Genbank	chr11	+	6107161	6107687	524	natural antisense	uc007hxz.2	Nudcd3	-	6105691	6200451
ENSMUST00000182718	2.75726	0.291745	1.597	0.206332	0.830383	up	2	0	0	0	0	0	1.15223	0.0597462	0.0597462	0.0597462	0.0597462	0.0597462	Ptprv	Ensembl	chr1	-	135110274	135111546	593	exon sense-overlapping	NM_007955	Ptprv	-	135108497	135132575
ENSMUST00000155513	2.75726	0.291745	1.597	0.206332	0.830383	up	2	0	0	0	0	0	1.15223	0.0597462	0.0597462	0.0597462	0.0597462	0.0597462	Fxr2	Ensembl	chr11	+	69640152	69641411	305	exon sense-overlapping	NM_011814	Fxr2	+	69632970	69653297
ENSMUST00000141782	2.75726	0.291745	1.597	0.206332	0.830383	up	2	0	0	0	0	0	1.15223	0.0597462	0.0597462	0.0597462	0.0597462	0.0597462	Rgp1	Ensembl	chr4	+	43581213	43581720	336	exon sense-overlapping	NM_172866	Rgp1	+	43578734	43587487
AK081729	2.75726	0.291745	1.597	0.206332	0.830383	up	2	0	0	0	0	0	1.15223	0.0597462	0.0597462	0.0597462	0.0597462	0.0597462	TUname23354	Genbank	chr14	-	70934044	70935821	1778	intronic antisense	uc007upb.1	Gfra2	+	70890129	70979838
ENSMUST00000134642	2.75726	0.291745	1.597	0.206332	0.830383	up	2	0	0	0	0	0	1.15223	0.0597462	0.0597462	0.0597462	0.0597462	0.0597462	Dmap1	Ensembl	chr4	-	117681301	117682211	443	exon sense-overlapping	NM_023178	Dmap1	-	117674685	117682225
AK157496	2.75726	0.291745	1.597	0.206332	0.830383	up	2	0	0	0	0	0	1.15223	0.0597462	0.0597462	0.0597462	0.0597462	0.0597462	TUname50031	Genbank	chr3	-	53072164	53075237	3093	intronic antisense	ENSMUST00000147139	Lhfp	+	53041582	53261679
uc007nta.1	2.75726	0.291745	1.597	0.206332	0.830383	up	2	0	0	0	0	0	1.15223	0.0597462	0.0597462	0.0597462	0.0597462	0.0597462	Atl1	UCSC_knowngene	chr12	+	69946176	69955387	525	exon sense-overlapping	NM_178628	Atl1	+	69893104	69964085
ENSMUST00000169533	2.75726	0.291745	1.597	0.206332	0.830383	up	2	0	0	0	0	0	1.15223	0.0597462	0.0597462	0.0597462	0.0597462	0.0597462	Mcoln2	Ensembl	chr3	+	146149978	146172445	855	exon sense-overlapping	NM_026656	Mcoln2	+	146149832	146195511
EF648170	2.75726	0.291745	1.597	0.206332	0.830383	up	2	0	0	0	0	0	1.15223	0.0597462	0.0597462	0.0597462	0.0597462	0.0597462	TUname64145	Genbank	chr12	+	109530891	109532903	2012	intergenic
NR_033729	2.75726	0.291745	1.597	0.206332	0.830383	up	2	0	0	0	0	0	1.15223	0.0597462	0.0597462	0.0597462	0.0597462	0.0597462	Fbxl12os	RefSeq	chr9	+	20607474	20617271	2355	intergenic
ENSMUST00000129701	2.75726	0.291745	1.597	0.206332	0.830383	up	2	0	0	0	0	0	1.15223	0.0597462	0.0597462	0.0597462	0.0597462	0.0597462	Gm15976	Ensembl	chr16	+	91924437	91928635	429	intronic antisense	NM_138597	Atp5o	-	91925222	91931630
TCONS_00013510	2.75726	0.291745	1.597	0.206332	0.830383	up	2	0	0	0	0	0	1.15223	0.0597462	0.0597462	0.0597462	0.0597462	0.0597462	XLOC_010590	Alexander et al 2013	chr17	-	26316583	26322776	1248	intergenic
TCONS_00006893	2.75726	0.291745	1.597	0.206332	0.830383	up	2	0	0	0	0	0	1.15223	0.0597462	0.0597462	0.0597462	0.0597462	0.0597462	XLOC_005556	Alexander et al 2013	chr12	-	35888277	35896017	230	intergenic
uc009qja.1	2.75726	0.291745	1.597	0.206332	0.830383	up	2	0	0	0	0	0	1.15223	0.0597462	0.0597462	0.0597462	0.0597462	0.0597462	DQ552053	UCSC_knowngene	chr9	-	67722638	67722668	30	intergenic
ENSMUST00000141318	2.75726	0.291745	1.597	0.206332	0.830383	up	2	0	0	0	0	0	1.15223	0.0597462	0.0597462	0.0597462	0.0597462	0.0597462	Xpa	Ensembl	chr4	-	46175221	46185682	577	exon sense-overlapping	ENSMUST00000142380	Xpa	-	46182968	46196304
ENSMUST00000123606	2.75726	0.291745	1.597	0.206332	0.830383	up	2	0	0	0	0	0	1.15223	0.0597462	0.0597462	0.0597462	0.0597462	0.0597462	Gm12670	Ensembl	chr4	+	91646314	91651152	576	intergenic
ENSMUST00000139775	2.75726	0.291745	1.597	0.206332	0.830383	up	2	0	0	0	0	0	1.15223	0.0597462	0.0597462	0.0597462	0.0597462	0.0597462	Pygm	Ensembl	chr19	+	6397494	6398291	532	exon sense-overlapping	NM_011224	Pygm	+	6384428	6398459
uc008zaz.1	2.75726	0.291745	1.597	0.206332	0.830383	up	2	0	0	0	0	0	1.15223	0.0597462	0.0597462	0.0597462	0.0597462	0.0597462	DQ542779	UCSC_knowngene	chr5	-	114844049	114844086	37	intergenic
NR_033604	2.75726	0.291745	1.597	0.206332	0.830383	up	2	0	0	0	0	0	1.15223	0.0597462	0.0597462	0.0597462	0.0597462	0.0597462	Gm4971	RefSeq	chr7	-	73685491	73686563	1072	intergenic
ENSMUST00000147164	2.75726	0.291745	1.597	0.206332	0.830383	up	2	0	0	0	0	0	1.15223	0.0597462	0.0597462	0.0597462	0.0597462	0.0597462	Crlf3	Ensembl	chr11	-	80056216	80057899	476	exon sense-overlapping	NM_001277106	Crlf3	-	80046492	80080991
ENSMUST00000128785	2.75726	0.291745	1.597	0.206332	0.830383	up	2	0	0	0	0	0	1.15223	0.0597462	0.0597462	0.0597462	0.0597462	0.0597462	Ccne1	Ensembl	chr7	-	38098667	38099501	628	exon sense-overlapping	NM_007633	Ccne1	-	38097983	38107490
uc029vxl.1	2.75726	0.291745	1.597	0.206332	0.830383	up	2	0	0	0	0	0	1.15223	0.0597462	0.0597462	0.0597462	0.0597462	0.0597462	DQ548839	UCSC_knowngene	chr6	-	87990652	87990684	32	intronic antisense	ENSMUST00000153372	Gm5577	+	87981682	88005471
AK089870	2.75726	0.291745	1.597	0.206332	0.830383	up	2	0	0	0	0	0	1.15223	0.0597462	0.0597462	0.0597462	0.0597462	0.0597462	TUname28371	Genbank	chr6	-	86261554	86263914	2360	natural antisense	NM_031199	Tgfa	+	86195250	86275449
ENSMUST00000121294	2.75726	0.291745	1.597	0.206332	0.830383	up	2	0	0	0	0	0	1.15223	0.0597462	0.0597462	0.0597462	0.0597462	0.0597462	Gm14763	Ensembl	chrX	+	85966882	85967209	327	intergenic
NR_040564	2.75726	0.291745	1.597	0.206332	0.830383	up	2	0	0	0	0	0	1.15223	0.0597462	0.0597462	0.0597462	0.0597462	0.0597462	4930547E14Rik	RefSeq	chr16	+	59636944	59672993	549	intronic antisense	ENSMUST00000149797	Arl6	-	59621218	59639129
TCONS_00012222	2.75726	0.291745	1.597	0.206332	0.830383	up	2	0	0	0	0	0	1.15223	0.0597462	0.0597462	0.0597462	0.0597462	0.0597462	XLOC_009323	Alexander et al 2013	chr16	-	4466100	4475192	1170	intergenic
uc029rvw.1	2.75726	0.291745	1.597	0.206332	0.830383	up	2	0	0	0	0	0	1.15223	0.0597462	0.0597462	0.0597462	0.0597462	0.0597462	DQ685917	UCSC_knowngene	chr12	-	98408573	98408606	33	intergenic
uc008oxx.1	2.75726	0.291745	1.597	0.206332	0.830383	up	2	0	0	0	0	0	1.15223	0.0597462	0.0597462	0.0597462	0.0597462	0.0597462	DQ687106	UCSC_knowngene	chr3	+	34873109	34873138	29	intergenic
AK137713	2.75726	0.291745	1.597	0.206332	0.830383	up	2	0	0	0	0	0	1.15223	0.0597462	0.0597462	0.0597462	0.0597462	0.0597462	TUname34880	Genbank	chr6	-	108521518	108523165	1652	intronic antisense	NM_010585	Itpr1	+	108213095	108551116
uc007vxz.1	2.75726	0.291745	1.597	0.206332	0.830383	up	2	0	0	0	0	0	1.15223	0.0597462	0.0597462	0.0597462	0.0597462	0.0597462	AK041614	UCSC_knowngene	chr15	-	60144269	60187408	1524	intergenic
uc012hcd.1	2.75726	0.291745	1.597	0.206332	0.830383	up	2	0	0	0	0	0	1.15223	0.0597462	0.0597462	0.0597462	0.0597462	0.0597462	Cmtm6	UCSC_knowngene	chr9	+	114731202	114749346	3336	exon sense-overlapping	NM_026036	Cmtm6	+	114731202	114749343
ENSMUST00000127898	2.75726	0.291745	1.597	0.206332	0.830383	up	2	0	0	0	0	0	1.15223	0.0597462	0.0597462	0.0597462	0.0597462	0.0597462	Ccm2l	Ensembl	chr2	+	153065954	153081735	2280	exon sense-overlapping	ENSMUST00000129377	Ccm2l	+	153065997	153070950
TCONS_00000351	2.75726	0.291745	1.597	0.206332	0.830383	up	2	0	0	0	0	0	1.15223	0.0597462	0.0597462	0.0597462	0.0597462	0.0597462	XLOC_000763	Alexander et al 2013	chr1	-	4231122	4243233	123	intergenic
AK089688	2.75726	0.291745	1.597	0.206332	0.830383	up	2	0	0	0	0	0	1.15223	0.0597462	0.0597462	0.0597462	0.0597462	0.0597462	TUname8828	Genbank	chr8	+	68218172	68228397	3883	intergenic
ENSMUST00000151641	2.75726	0.291745	1.597	0.206332	0.830383	up	2	0	0	0	0	0	1.15223	0.0597462	0.0597462	0.0597462	0.0597462	0.0597462	Ttll9	Ensembl	chr2	+	152989458	152999325	526	exon sense-overlapping	NM_001083618	Ttll9	+	152962484	153008482
ENSMUST00000080330	2.75726	0.291745	1.597	0.206332	0.830383	up	2	0	0	0	0	0	1.15223	0.0597462	0.0597462	0.0597462	0.0597462	0.0597462	Gm10916	Ensembl	chr14	+	50769247	50769730	483	intronic antisense	ENSMUST00000006451	Ttc5	-	50765414	50785518
uc029sne.1	2.75726	0.291745	1.597	0.206332	0.830383	up	2	0	0	0	0	0	1.15223	0.0597462	0.0597462	0.0597462	0.0597462	0.0597462	AB335791	UCSC_knowngene	chr14	+	123999074	123999098	24	intronic antisense	NM_207667	Fgf14	-	123978290	124677127
ENSMUST00000121890	2.75726	0.291745	1.597	0.206332	0.830383	up	2	0	0	0	0	0	1.15223	0.0597462	0.0597462	0.0597462	0.0597462	0.0597462	Gm12035	Ensembl	chr11	-	20574566	20575189	623	intronic antisense	NM_021372	Sertad2	+	20543252	20653023
ENSMUST00000163040	2.75726	0.291745	1.597	0.206332	0.830383	up	2	0	0	0	0	0	1.15223	0.0597462	0.0597462	0.0597462	0.0597462	0.0597462	Crabp2	Ensembl	chr3	+	87952143	87952985	658	exon sense-overlapping	NM_007759	Crabp2	+	87948692	87953372
ENSMUST00000146347	2.75726	0.291745	1.597	0.206332	0.830383	up	2	0	0	0	0	0	1.15223	0.0597462	0.0597462	0.0597462	0.0597462	0.0597462	Nom1	Ensembl	chr5	+	29441317	29446355	531	exon sense-overlapping	NM_001033457	Nom1	+	29434666	29452169
ENSMUST00000151377	2.75726	0.291745	1.597	0.206332	0.830383	up	2	0	0	0	0	0	1.15223	0.0597462	0.0597462	0.0597462	0.0597462	0.0597462	Crtap	Ensembl	chr9	-	114375149	114378221	615	exon sense-overlapping	NM_019922	Crtap	-	114375130	114390712
ENSMUST00000181776	2.75726	0.291745	1.597	0.206332	0.830383	up	2	0	0	0	0	0	1.15223	0.0597462	0.0597462	0.0597462	0.0597462	0.0597462	Gm26812	Ensembl	chr8	+	121850193	121860621	599	intron sense-overlapping	ENSMUST00000127664	Gm20388	+	119910840	124345722
ENSMUST00000126219	2.75726	0.291745	1.597	0.206332	0.830383	up	2	0	0	0	0	0	1.15223	0.0597462	0.0597462	0.0597462	0.0597462	0.0597462	4933423P22Rik	Ensembl	chr2	+	90479235	90485084	4595	intronic antisense	NM_008982	Ptprj	-	90432888	90580647
AK154740	2.75726	0.291745	1.597	0.206332	0.830383	up	2	0	0	0	0	0	1.15223	0.0597462	0.0597462	0.0597462	0.0597462	0.0597462	TUname35326	Genbank	chr1	-	116568860	116572545	3686	natural antisense	NM_001077425	Cntnap5a	+	115685136	116580674
ENSMUST00000133506	2.75726	0.291745	1.597	0.206332	0.830383	up	2	0	0	0	0	0	1.15223	0.0597462	0.0597462	0.0597462	0.0597462	0.0597462	Ccdc61	Ensembl	chr7	-	18890883	18892546	712	exon sense-overlapping	NM_001033314	Ccdc61	-	18890883	18910404
NR_045357	2.75726	0.291745	1.597	0.206332	0.830383	up	2	0	0	0	0	0	1.15223	0.0597462	0.0597462	0.0597462	0.0597462	0.0597462	4930545H06Rik	RefSeq	chr10	-	68319064	68321142	769	intergenic
ENSMUST00000161395	2.75726	0.291745	1.597	0.206332	0.830383	up	2	0	0	0	0	0	1.15223	0.0597462	0.0597462	0.0597462	0.0597462	0.0597462	Gm15947	Ensembl	chr17	-	23853158	23858647	2742	natural antisense	NM_027220	Prss32	+	23853771	23859776
uc007fkv.2	2.75726	0.291745	1.597	0.206332	0.830383	up	2	0	0	0	0	0	1.15223	0.0597462	0.0597462	0.0597462	0.0597462	0.0597462	DQ554245	UCSC_knowngene	chr10	-	66695013	66695129	116	intergenic
U50954	2.75726	0.291745	1.597	0.206332	0.830383	up	2	0	0	0	0	0	1.15223	0.0597462	0.0597462	0.0597462	0.0597462	0.0597462	TUname12874	Genbank	chr6	+	39334772	39334910	140	natural antisense	NM_028123	Slc37a3	-	39334770	39377707
TCONS_00006764	2.75726	0.291745	1.597	0.206332	0.830383	up	2	0	0	0	0	0	1.15223	0.0597462	0.0597462	0.0597462	0.0597462	0.0597462	XLOC_005224	Alexander et al 2013	chr12	+	85538730	85541470	75	intergenic
ENSMUST00000122360	2.75726	0.291745	1.597	0.206332	0.830383	up	2	0	0	0	0	0	1.15223	0.0597462	0.0597462	0.0597462	0.0597462	0.0597462	Gm13981	Ensembl	chr2	+	117055565	117056012	447	intergenic
ENSMUST00000119727	2.75726	0.291745	1.597	0.206332	0.830383	up	2	0	0	0	0	0	1.15223	0.0597462	0.0597462	0.0597462	0.0597462	0.0597462	Gm6368	Ensembl	chrX	+	141980174	141982321	2147	intergenic
ENSMUST00000139913	2.75726	0.291745	1.597	0.206332	0.830383	up	2	0	0	0	0	0	1.15223	0.0597462	0.0597462	0.0597462	0.0597462	0.0597462	Pebp1	Ensembl	chr5	-	117285790	117287525	571	exon sense-overlapping	NM_018858	Pebp1	-	117282650	117287564
ENSMUST00000129034	2.75726	0.291745	1.597	0.206332	0.830383	up	2	0	0	0	0	0	1.15223	0.0597462	0.0597462	0.0597462	0.0597462	0.0597462	Grb7	Ensembl	chr11	+	98453788	98455125	991	exon sense-overlapping	NM_010346	Grb7	+	98446833	98455373
ENSMUST00000117745	2.75726	0.291745	1.597	0.206332	0.830383	up	2	0	0	0	0	0	1.15223	0.0597462	0.0597462	0.0597462	0.0597462	0.0597462	Gm15180	Ensembl	chr1	+	75568082	75568574	492	intergenic
BG069076	2.75726	0.291745	1.597	0.206332	0.830383	up	2	0	0	0	0	0	1.15223	0.0597462	0.0597462	0.0597462	0.0597462	0.0597462	TUname63543	Genbank	chr12	-	107806651	107807408	756	intergenic
TCONS_00003876	2.75726	0.291745	1.597	0.206332	0.830383	up	2	0	0	0	0	0	1.15223	0.0597462	0.0597462	0.0597462	0.0597462	0.0597462	XLOC_002839	Alexander et al 2013	chr11	+	17349369	17354539	2665	intergenic
uc007fkt.2	2.75726	0.291745	1.597	0.206332	0.830383	up	2	0	0	0	0	0	1.15223	0.0597462	0.0597462	0.0597462	0.0597462	0.0597462	DQ698920	UCSC_knowngene	chr10	-	66694775	66694805	30	intergenic
TCONS_00013402	2.75726	0.291745	1.597	0.206332	0.830383	up	2	0	0	0	0	0	1.15223	0.0597462	0.0597462	0.0597462	0.0597462	0.0597462	XLOC_010371	Alexander et al 2013	chr17	+	83574096	83578600	3047	intergenic
ENSMUST00000120362	2.75726	0.291745	1.597	0.206332	0.830383	up	2	0	0	0	0	0	1.15223	0.0597462	0.0597462	0.0597462	0.0597462	0.0597462	Gm11407	Ensembl	chr4	+	80002330	80003388	1058	intergenic
AK048835	2.75726	0.291745	1.597	0.206332	0.830383	up	2	0	0	0	0	0	1.15223	0.0597462	0.0597462	0.0597462	0.0597462	0.0597462	TUname41485	Genbank	chr17	-	69893759	69923995	1451	intergenic
ENSMUST00000173005	2.75726	0.291745	1.597	0.206332	0.830383	up	2	0	0	0	0	0	1.15223	0.0597462	0.0597462	0.0597462	0.0597462	0.0597462	Ube4b	Ensembl	chr4	-	149398499	149426216	621	exon sense-overlapping	NM_022022	Ube4b	-	149328415	149426631
AK086967_1	2.75726	0.291745	1.597	0.206332	0.830383	up	2	0	0	0	0	0	1.15223	0.0597462	0.0597462	0.0597462	0.0597462	0.0597462
AK080026	2.75726	0.291745	1.597	0.206332	0.830383	up	2	0	0	0	0	0	1.15223	0.0597462	0.0597462	0.0597462	0.0597462	0.0597462	TUname1203	Genbank	chr2	-	170177292	170184674	974	intergenic
AK144508	2.7517	1.41113	2.44823	0.11766	0.830383	up	12	0	4	0	0	2	3.02219	0.0597462	1.46274	0.0597462	0.0597462	1.1684	TUname9454	Genbank	chr6	+	91411512	91412713	1201	bidirectional	NM_009527	Wnt7a	-	91363982	91411369
ENSMUST00000136598	2.75033	0.927502	1.63815	0.200582	0.830383	up	0	6	3	1	0	0	0.0597462	2.12037	1.21897	0.626355	0.0597462	0.0597462	Capn10	Ensembl	chr1	+	92946884	92947590	458	exon sense-overlapping	NM_011796	Capn10	+	92934407	92947948
AK037188	2.74316	0.92364	1.62845	0.201921	0.830383	up	2	3	4	0	1	0	1.15223	1.43038	1.46274	0.0597462	0.621297	0.0597462	TUname58713	Genbank	chr13	-	119698359	119704549	1900	natural antisense	uc007rzx.1	Hmgcs1	+	119690461	119702186
AK040828	2.74142	1.96643	4.3323	0.0373976	0.830383	up	8	1	22	0	4	0	2.52693	0.671968	3.38812	0.0597462	1.5975	0.0597462	TUname40775	Genbank	chr3	-	95178789	95180865	2076	intergenic
TCONS_00034198	2.74129	1.93887	4.21501	0.04007	0.830383	up	11	14	2	4	0	0	2.91339	3.13023	0.925468	1.60777	0.0597462	0.0597462	XLOC_025899	Alexander et al 2013	chr9	-	63935481	63943920	2324	intergenic
AA880618	2.73421	0.950512	1.62407	0.202527	0.830383	up	1	7	1	0	0	1	0.707016	2.29249	0.556593	0.0597462	0.0597462	0.718048	TUname63182	Genbank	chr8	+	84983359	84983637	278	intergenic
ENSMUST00000142660	2.73084	0.289294	1.57815	0.209029	0.830383	up	1	1	0	0	0	0	0.707016	0.671968	0.0597462	0.0597462	0.0597462	0.0597462	Dhdds	Ensembl	chr4	-	133969062	134000393	3043	exon sense-overlapping	ENSMUST00000130464	Dhdds	-	133970920	133994199
BY732203	2.73084	0.289294	1.57815	0.209029	0.830383	up	1	1	0	0	0	0	0.707016	0.671968	0.0597462	0.0597462	0.0597462	0.0597462	TUname63793	Genbank	chr2	-	154420459	154421177	717	intergenic
AK155989	2.73084	0.289294	1.57815	0.209029	0.830383	up	1	1	0	0	0	0	0.707016	0.671968	0.0597462	0.0597462	0.0597462	0.0597462	TUname41518	Genbank	chr2	-	46260677	46265344	4659	intergenic
2_00014187	2.73084	0.289294	1.57815	0.209029	0.830383	up	1	1	0	0	0	0	0.707016	0.671968	0.0597462	0.0597462	0.0597462	0.0597462	BC031181	Lei Sun et al 2012	chr18	+	75005748	75009990	1041	exon sense-overlapping	uc008fpx.1	BC031181	+	75005867	75009933
ENSMUST00000134444	2.73084	0.289294	1.57815	0.209029	0.830383	up	1	1	0	0	0	0	0.707016	0.671968	0.0597462	0.0597462	0.0597462	0.0597462	Golim4	Ensembl	chr3	-	75886770	75893082	563	exon sense-overlapping	NM_175193	Golim4	-	75876383	75956831
AK086743	2.73084	0.289294	1.57815	0.209029	0.830383	up	1	1	0	0	0	0	0.707016	0.671968	0.0597462	0.0597462	0.0597462	0.0597462	TUname40302	Genbank	chr16	-	78489679	78492955	3279	intergenic
ENSMUST00000123459	2.73084	0.289294	1.57815	0.209029	0.830383	up	1	1	0	0	0	0	0.707016	0.671968	0.0597462	0.0597462	0.0597462	0.0597462	Gm11946	Ensembl	chr11	+	3530947	3536856	3941	natural antisense	ENSMUST00000110011	Smtn	-	3517522	3537398
ENSMUST00000161507	2.73084	0.289294	1.57815	0.209029	0.830383	up	1	1	0	0	0	0	0.707016	0.671968	0.0597462	0.0597462	0.0597462	0.0597462	Fancc	Ensembl	chr13	-	63347481	63398294	494	exon sense-overlapping	ENSMUST00000162375	Fancc	-	63347472	63406297
ENSMUST00000125014	2.73084	0.289294	1.57815	0.209029	0.830383	up	1	1	0	0	0	0	0.707016	0.671968	0.0597462	0.0597462	0.0597462	0.0597462	Adamts17	Ensembl	chr7	+	66849706	66871825	259	exon sense-overlapping	ENSMUST00000107478	Adamts17	+	66839812	67152625
ENSMUST00000160472	2.73084	0.289294	1.57815	0.209029	0.830383	up	1	1	0	0	0	0	0.707016	0.671968	0.0597462	0.0597462	0.0597462	0.0597462	Ccdc150	Ensembl	chr1	+	54250721	54368470	3696	exon sense-overlapping	NM_030025	Ccdc150	+	54250682	54368727
ENSMUST00000139026	2.73084	0.289294	1.57815	0.209029	0.830383	up	1	1	0	0	0	0	0.707016	0.671968	0.0597462	0.0597462	0.0597462	0.0597462	Vsig10	Ensembl	chr5	+	117349909	117355005	2653	exon sense-overlapping	NM_001033311	Vsig10	+	117319265	117355006
uc009rct.1	2.73084	0.289294	1.57815	0.209029	0.830383	up	1	1	0	0	0	0	0.707016	0.671968	0.0597462	0.0597462	0.0597462	0.0597462	AK089981	UCSC_knowngene	chr9	+	96765574	96782477	1029	intergenic
ENSMUST00000180011	2.73084	0.289294	1.57815	0.209029	0.830383	up	1	1	0	0	0	0	0.707016	0.671968	0.0597462	0.0597462	0.0597462	0.0597462	Gm8112	Ensembl	chr10	-	81693717	81694185	468	intergenic
ENSMUST00000126603	2.73084	0.289294	1.57815	0.209029	0.830383	up	1	1	0	0	0	0	0.707016	0.671968	0.0597462	0.0597462	0.0597462	0.0597462	Lgals4	Ensembl	chr7	+	28835935	28841701	1059	exon sense-overlapping	NM_010706	Lgals4	+	28833793	28841703
[truncated: 14,110 more rows]

## Sheet: down_MCAO_vs_Sham
Differentially expressed LncRNAs for: down_MCAO_vs_Sham Fold Change cut-off: 1 P-value cut-off: 1 Column A: Transcript_id, the Ensembl transcript identifier. Column B ~ G: Statistical results, statistical results by edgeR. Column H ~ M: raw counts of all samples of the transcript by htseq. Column N ~ S: normalized counts by edgeR. Column S ~ AF: the annotation of the LncRNA and the genomic organi…
[truncated: 15,434 more rows]
