# Supplementary material for: Transcriptome-Wide 5-Methylcytosine Profiling of lncRNAs in the Mouse Cerebral Ischemia Model
Source: Pharmaceuticals (Basel). 2024 Mar 18;17(3):384. doi: 10.3390/ph17030384 (PMC10974612; doi:10.3390/ph17030384)
Supplement: Supplementary file 1 [file pharmaceuticals-17-00384-s001.zip › Differentially_methylated_sites.LncRNA summary.xlsx]

## Sheet: up.MCAO_vs_Sham
Differentially methylated RNA sites for: up.MCAO_vs_Sham Fold change cut-off: 1 P-value cut-off: 1 Column A ~ E: the coordinates of the differentially methylated RNA sites in bed format, please ref http://genome.ucsc.edu/FAQ/FAQformat.html#format1. Column F: the length of the methylated RNA sites Column G ~ H: the transcript id and gene symbol of differentially methylated LncRNA. Column I ~ L: th…
	up.MCAO_vs_Sham differentially methylated RNA sites
bed format information of differentially methylated RNA sites					differentially methylated RNA			comparison information				Annotations
chrom	txStart	txEnd	PeakID	score	Peak_length	transcript_id	GeneName	Foldchange	P_value	FDR	Regulation	source	RNAlength	coordinates	relationship	Associated_gene_acc	Associated_gene_name	Associated_gene_coordinates
chr17	35142401	35142602	diffreps_peak_76776	0.0761777	201	ENSMUST00000174613	Bag6	1.27543	0.839117	1	up	Ensembl	402	chr17:35141977-35142602+	exon sense-overlapping	ENSMUST00000173535	Bag6	chr17:35135486-35142595+
chr11	77840932	77841100	diffreps_peak_29758	1.33314	168	ENSMUST00000100443	Myo18a	1.40764	0.0464369	0.18289	up	Ensembl	3807	chr11:77840933-77844878+	exon sense-overlapping	NM_011586	Myo18a	chr11:77777235-77865988+
chr8	70404881	70405320	diffreps_peak_173255	3.61283	439	ENSMUST00000125613	Crtc1	1.47378	0.000243876	0.00158595	up	Ensembl	870	chr8:70404849-70439575-	exon sense-overlapping	NM_001004062	Crtc1	chr8:70382358-70439573-
chr9	40801781	40802080	diffreps_peak_181574	1.07246	299	ENSMUST00000138895	Hspa8	1.2273	0.0846337	0.299333	up	Ensembl	920	chr9:40801289-40802498+	exon sense-overlapping	ENSMUST00000117557	Hspa8	chr9:40801302-40805200+
chr8	83937648	83937828	diffreps_peak_174630	2.36925	180	ENSMUST00000141661	Lphn1	1.44943	0.0042732	0.0224399	up	Ensembl	440	chr8:83936155-83937828+	exon sense-overlapping	ENSMUST00000152978	Lphn1	chr8:83900735-83939987+
chr8	65617901	65618100	diffreps_peak_172710	0.119123	199	ENSMUST00000152320	March1	1.18019	0.760111	1	up	Ensembl	2907	chr8:65617900-66469960+	exon sense-overlapping	ENSMUST00000110256	March1	chr8:65618025-66469713+
chr5	112213841	112214040	diffreps_peak_137859	0.0134743	199	NR_003718	Miat	1.01698	0.969451	1	up	RefSeq	8716	chr5:112213228-112228948-	intergenic
chr2	6721641	6721880	diffreps_peak_92446	1.04513	239	ENSMUST00000126742	Celf2	2.16142	0.0901304	0.315008	up	Ensembl	2075	chr2:6623528-6722216-	exon sense-overlapping	NM_001110229	Celf2	chr2:6539699-7081302-
chr10	83611221	83611760	diffreps_peak_20012	0.990394	539	ENSMUST00000147582	Appl2	1.55607	0.102237	0.347933	up	Ensembl	3377	chr10:83605645-83648670-	exon sense-overlapping	NM_145220	Appl2	chr10:83600034-83648664-
chr6	124732221	124732440	diffreps_peak_152231	8.06336	219	ENSMUST00000004377	AK048048	998.9	8.64249e-09	2.35869e-07	up	UCSC_knowngene	1373	chr6:124732168-124738040+	natural antisense	ENSMUST00000004377	Ptpn6	chr6:124720707-124738625-
chr4	142146961	142147145	diffreps_peak_127776	1.52553	184	ENSMUST00000144611	Kazn	1.94898	0.0298172	0.125433	up	Ensembl	723	chr4:142146770-142154586-	exon sense-overlapping	NM_001109684	Kazn	chr4:142139240-142210208-
chr11	3533741	3534000	diffreps_peak_23568	8.46388	259	ENSMUST00000123459	Gm11946	996.4	3.4365e-09	1.60662e-07	up	Ensembl	3941	chr11:3530948-3536856+	natural antisense	NM_001159284	Smtn	chr11:3517522-3539292-
chr7	101785341	101785540	diffreps_peak_164067	1.42859	199	ENSMUST00000150832	Clpb	1.90501	0.0372747	0.151664	up	Ensembl	739	chr7:101763606-101785635+	exon sense-overlapping	NM_009191	Clpb	chr7:101663768-101790168+
chr2	156537356	156537483	diffreps_peak_104025	1.19938	127	ENSMUST00000129999	Epb4.1l1	1.18707	0.0631855	0.235264	up	Ensembl	644	chr2:156537357-156540326+	exon sense-overlapping	ENSMUST00000103135	Epb4.1l1	chr2:156475883-156543214+
chr13	109116235	109116240	diffreps_peak_50011	0.18925	5	ENSMUST00000129374	Pde4d	1.30255	0.64677	1	up	Ensembl	2397	chr13:109116236-109335063+	intron sense-overlapping	ENSMUST00000122041	Pde4d	chr13:108654177-109951474+
chr18	7871741	7871790	diffreps_peak_81782	0.352164	49	ENSMUST00000165572	Wac	1.17892	0.444463	0.964568	up	Ensembl	654	chr18:7869241-7871790+	exon sense-overlapping	NM_153085	Wac	chr18:7869197-7929028+
chr17	34113931	34114300	diffreps_peak_76567	4.88919	369	ENSMUST00000148143	Brd2	1.31666	1.29067e-05	9.83339e-05	up	Ensembl	683	chr17:34113759-34114951-	exon sense-overlapping	ENSMUST00000025193	Brd2	chr17:34112023-34122317-
chr1	9601621	9601820	diffreps_peak_477	0.0964897	199	ENSMUST00000148585	2610203C22Rik	1.03645	0.800775	1	up	Ensembl	3475	chr1:9600413-9631144-	natural antisense	ENSMUST00000088666	3110035E14Rik	chr1:9601199-9627143+
chr7	27434187	27434320	diffreps_peak_157067	0.0993307	133	ENSMUST00000138087	Sptbn4	1.16306	0.795553	1	up	Ensembl	421	chr7:27433136-27434369-	exon sense-overlapping	ENSMUST00000152572	Sptbn4	chr7:27434201-27447686-
chr18	65991421	65991640	diffreps_peak_85543	0.150227	219	ENSMUST00000144793	Lman1	1.11401	0.707575	1	up	Ensembl	2139	chr18:65991151-65993660-	exon sense-overlapping	ENSMUST00000048260	Lman1	chr18:65980754-66002637-
chr11	69601781	69602080	diffreps_peak_28569	8.04927	299	ENSMUST00000130394	Atp1b2	949.4	8.92741e-09	2.39181e-07	up	Ensembl	3751	chr11:69599741-69605942-	exon sense-overlapping	ENSMUST00000047889	Atp1b2	chr11:69599736-69605829-
chr17	32285041	32285300	diffreps_peak_76233	0.347463	259	ENSMUST00000181112	Gm26549	1.22703	0.4493	0.970382	up	Ensembl	1209	chr17:32284787-32298689+	bidirectional	ENSMUST00000119123	Brd4	chr17:32196274-32284097-
chr11	77842561	77842780	diffreps_peak_29767	0.0941133	219	ENSMUST00000100443	Myo18a	1.02143	0.805168	1	up	Ensembl	3807	chr11:77840933-77844878+	exon sense-overlapping	ENSMUST00000167856	Myo18a	chr11:77811515-77865980+
chr2	130283981	130284240	diffreps_peak_101814	0.258486	259	ENSMUST00000124868	Idh3b	1.2614	0.55146	1	up	Ensembl	620	chr2:130283663-130284415-	exon sense-overlapping	NM_130884	Idh3b	chr2:130279309-130284451-
chr12	3779547	3779640	diffreps_peak_35844	0.458953	93	ENSMUST00000174293	Dtnb	1.5984	0.347574	0.832327	up	Ensembl	400	chr12:3779548-3781398+	exon sense-overlapping	ENSMUST00000173542	Dtnb	chr12:3749543-3781398+
chr11	120106433	120106620	diffreps_peak_35394	0.334332	187	ENSMUST00000146641	Slc38a10	1.07472	0.463093	0.986139	up	Ensembl	971	chr11:120105621-120106988-	exon sense-overlapping	ENSMUST00000045402	Slc38a10	chr11:120103960-120151346-
chr4	42164721	42164736	diffreps_peak_119071	8.43638	15	ENSMUST00000133764	Gm13305	918.5	3.66113e-09	1.60662e-07	up	Ensembl	726	chr4:42162762-42164736-	exon sense-overlapping	NM_010550	Il11ra2	chr4:42158116-42168604-
chr17	24516301	24516599	diffreps_peak_74918	8.52358	298	ENSMUST00000176434	Traf7	885.1	2.99513e-09	1.60662e-07	up	Ensembl	559	chr17:24516300-24527850-	exon sense-overlapping	ENSMUST00000177154	Traf7	chr17:24513059-24527489-
chr11	85821965	85822112	diffreps_peak_30699	0.319344	147	ENSMUST00000140562	Bcas3	1.44601	0.479353	1	up	Ensembl	253	chr11:85821966-85825307+	exon sense-overlapping	ENSMUST00000154396	Bcas3	chr11:85466159-85826058+
chr11	87781921	87782049	diffreps_peak_30899	0.0453077	128	ENSMUST00000148814	Bzrap1	1.08559	0.900933	1	up	Ensembl	2678	chr11:87778793-87785928+	exon sense-overlapping	NM_172449	Bzrap1	chr11:87760541-87785928+
chr7	45786761	45786960	diffreps_peak_159526	0.397672	199	ENSMUST00000134347	Lmtk3	1.8116	0.400247	0.906525	up	Ensembl	872	chr7:45785510-45787758+	exon sense-overlapping	ENSMUST00000120005	Lmtk3	chr7:45785380-45804144+
chr6	134566642	134566965	diffreps_peak_152966	0.147525	323	ENSMUST00000126836	Lrp6	1.4625	0.711992	1	up	Ensembl	722	chr6:134511284-134566965-	exon sense-overlapping	NM_008514	Lrp6	chr6:134446478-134566913-
chr10	127288541	127288577	diffreps_peak_22804	0.131499	36	ENSMUST00000172591	Gm20492	1.34253	0.738756	1	up	Ensembl	286	chr10:127288514-127289681+	intronic antisense	ENSMUST00000026476	Mbd6	chr10:127281956-127288890-
chr19	4743941	4744340	diffreps_peak_87406	0.0103919	399	uc008gap.1	Rbm14-rbm4	1.01139	0.976356	1	up	UCSC_knowngene	2612	chr19:4742913-4811634-	intronic antisense	NM_025717	Rbm4b	chr19:4756525-4765941+
chr11	102863336	102863380	diffreps_peak_33026	0.0331326	44	ENSMUST00000181125	Gm26668	1.11544	0.926547	1	up	Ensembl	3635	chr11:102863337-103075903+	intronic antisense	ENSMUST00000021311	Kif18b	chr11:102905529-102925124-
chr5	111235314	111235400	diffreps_peak_137772	8.46628	86	ENSMUST00000129017	Ttc28	882.4	3.41759e-09	1.60662e-07	up	Ensembl	392	chr5:111235315-111266599+	exon sense-overlapping	ENSMUST00000040111	Ttc28	chr5:110879803-111289779+
chr15	34511961	34512180	diffreps_peak_60053	8.33955	219	ENSMUST00000126223	Pop1	842.8	4.57558e-09	1.60683e-07	up	Ensembl	392	chr15:34509907-34512192+	exon sense-overlapping	ENSMUST00000079028	Pop1	chr15:34495323-34530637+
chr4	133612922	133613034	diffreps_peak_126418	1.84114	112	ENSMUST00000142382	Zdhhc18	1.73564	0.0144165	0.0666167	up	Ensembl	260	chr4:133608739-133613034-	exon sense-overlapping	ENSMUST00000084238	Zdhhc18	chr4:133605299-133633469-
chr5	35841481	35841532	diffreps_peak_132703	0.78052	51	ENSMUST00000135885	Ablim2	2.69398	0.16576	0.499988	up	Ensembl	508	chr5:35828155-35841532+	exon sense-overlapping	ENSMUST00000129347	Ablim2	chr5:35758051-35883419+
chr10	81155521	81155751	diffreps_peak_19473	7.9802	230	ENSMUST00000147436	Pias4	837.9	1.04664e-08	2.65078e-07	up	Ensembl	771	chr10:81155502-81158011-	exon sense-overlapping	NM_021501	Pias4	chr10:81153966-81167720-
chr1	191896181	191896560	diffreps_peak_12843	8.52886	379	NR_030669	1700034H15Rik	832.1	2.95897e-09	1.60662e-07	up	RefSeq	4362	chr1:191894072-191907527-	natural antisense	NM_009579	Slc30a1	chr1:191906781-191913247+
chr5	74536681	74536845	diffreps_peak_135249	0.100412	164	ENSMUST00000135377	Fip1l1	1.12291	0.793576	1	up	Ensembl	4986	chr5:74535485-74540566+	exon sense-overlapping	NM_001159574	Fip1l1	chr5:74535482-74597124+
chr2	25060135	25060562	diffreps_peak_93922	4.60555	427	ENSMUST00000152506	Nsmf	1.64543	2.48e-05	0.000182489	up	Ensembl	581	chr2:25060136-25061107+	exon sense-overlapping	ENSMUST00000116574	Nsmf	chr2:25054379-25062880+
chr7	116103194	116103320	diffreps_peak_165107	0.174289	126	ENSMUST00000151254	1110004F10Rik	1.10263	0.669439	1	up	Ensembl	1430	chr7:116093366-116105210+	exon sense-overlapping	ENSMUST00000032899	1110004F10Rik	chr7:116093301-116105210+
chr15	85896401	85896740	diffreps_peak_64257	8.46744	339	ENSMUST00000159362	Trmu	808.1	3.40851e-09	1.60662e-07	up	Ensembl	869	chr15:85894751-85897059+	exon sense-overlapping	NM_028063	Trmu	chr15:85879327-85897393+
chr3	126925587	126925600	diffreps_peak_114657	0.036587	13	ENSMUST00000182212	Ank2	1.15286	0.919206	1	up	Ensembl	2780	chr3:126925588-126928367-	intron sense-overlapping	ENSMUST00000182779	Ank2	chr3:126923325-127225897-
chr4	117289025	117289111	diffreps_peak_124272	0.0235073	86	ENSMUST00000133971	Rnf220	1.00092	0.947311	1	up	Ensembl	341	chr4:117285379-117289111-	exon sense-overlapping	ENSMUST00000030439	Rnf220	chr4:117271463-117497052-
chr6	113755216	113755380	diffreps_peak_151005	1.22051	164	uc009dhq.2	Atp2b2	1.49264	0.0601849	0.226061	up	UCSC_knowngene	7393	chr6:113745668-114042080-	exon sense-overlapping	ENSMUST00000101044	Atp2b2	chr6:113748294-113934681-
chr2	155974209	155974320	diffreps_peak_103820	0.00580875	111	ENSMUST00000124812	6430550D23Rik	1.02116	0.986714	1	up	Ensembl	2429	chr2:155973279-156007907-	exon sense-overlapping	NM_001145351	6430550D23Rik	chr2:156000443-156004427-
chr4	130021521	130021661	diffreps_peak_125969	0.698993	140	ENSMUST00000136787	Bai2	1.41148	0.199989	0.574673	up	Ensembl	828	chr4:130021115-130022430+	exon sense-overlapping	NM_173071	Adgrb2	chr4:129985078-130022633+
chr4	148983961	148984460	diffreps_peak_128459	1.15859	499	uc033igt.1	AK035651	1.93642	0.0694084	0.254421	up	UCSC_knowngene	2899	chr4:148960326-148984671+	natural antisense	NM_019781	Pex14	chr4:148960535-149099812-
chr4	135329168	135329360	diffreps_peak_126640	0.412748	192	ENSMUST00000162914	Srrm1	1.37584	0.386591	0.888616	up	Ensembl	512	chr4:135329169-135332233-	exon sense-overlapping	ENSMUST00000030613	Srrm1	chr4:135322033-135353136-
chr10	81347435	81347600	diffreps_peak_19653	8.44077	165	ENSMUST00000140268	Hmg20b	802	3.62433e-09	1.60662e-07	up	Ensembl	546	chr10:81346998-81347922-	exon sense-overlapping	ENSMUST00000122993	Hmg20b	chr10:81346051-81350191-
chr1	171417329	171417460	diffreps_peak_11573	0.0374797	131	ENSMUST00000159929	Usf1	1.00957	0.917319	1	up	Ensembl	492	chr1:171417330-171417930+	exon sense-overlapping	NM_001305676	Usf1	chr1:171411313-171418759+
chr4	128499065	128499220	diffreps_peak_125646	8.52658	155	ENSMUST00000148247	Csmd2	753.9	2.97454e-09	1.60662e-07	up	Ensembl	3320	chr4:128477154-128501177+	exon sense-overlapping	NM_001281955	Csmd2	chr4:127988044-128567656+
chr3	131111301	131111680	diffreps_peak_114925	0.399163	379	uc008rjh.1	BC051212	1.96974	0.398875	0.904666	up	UCSC_knowngene	1510	chr3:131110581-131112090-	natural antisense	NM_010703	Lef1	chr3:131110297-131224357+
chr11	118202372	118202470	diffreps_peak_34793	0.0969794	98	uc007mos.1	Cyth1	1.0431	0.799872	1	up	UCSC_knowngene	181	chr11:118193615-118202470-	exon sense-overlapping	NM_011180	Cyth1	chr11:118164166-118248592-
chr6	85193801	85194180	diffreps_peak_148859	0.204675	379	ENSMUST00000173919	Emx1	1.56503	0.624202	1	up	Ensembl	1258	chr6:85193519-85204462+	exon sense-overlapping	ENSMUST00000045942	Emx1	chr6:85187438-85204358+
chr6	119970746	119970820	diffreps_peak_151770	1.55735	74	ENSMUST00000159151	Wnk1	1.32614	0.027711	0.117897	up	Ensembl	628	chr6:119970747-119973064-	exon sense-overlapping	ENSMUST00000088644	Wnk1	chr6:119923971-120038655-
chr2	31105241	31105420	diffreps_peak_95046	0.183425	179	ENSMUST00000136085	Fnbp1	1.07443	0.655504	1	up	Ensembl	350	chr2:31096091-31105450-	exon sense-overlapping	ENSMUST00000100207	Fnbp1	chr2:31033010-31141802-
chr16	20707621	20707880	diffreps_peak_68169	0.200053	259	ENSMUST00000153075	Clcn2	1.05344	0.63088	1	up	Ensembl	3511	chr16:20702998-20716164-	natural antisense	ENSMUST00000056518	Fam131a	chr16:20694908-20703048+
chr19	6371161	6371419	diffreps_peak_88037	5.23626	258	ENSMUST00000144239	Sf1	1.50147	5.80412e-06	4.62502e-05	up	Ensembl	785	chr19:6370712-6371694+	exon sense-overlapping	NM_001110791	Sf1	chr19:6363690-6378038+
chr17	25935121	25935320	diffreps_peak_75308	1.23346	199	ENSMUST00000148064	Gm16278	3.02148	0.0584177	0.220967	up	Ensembl	2071	chr17:25919089-25935745+	natural antisense	ENSMUST00000133650	Pigq	chr17:25926427-25937162-
chr19	4744461	4744720	diffreps_peak_87409	0.0705268	259	uc008gap.1	Rbm14-rbm4	1.02218	0.850106	1	up	UCSC_knowngene	2612	chr19:4742913-4811634-	exon sense-overlapping	ENSMUST00000180008	Rbm14	chr19:4801777-4811512-
chr7	139978061	139978420	diffreps_peak_167178	8.49485	359	uc012fvx.1	AK078239	726.5	3.2e-09	1.60662e-07	up	UCSC_knowngene	2374	chr7:139950396-139978977+	natural antisense	NM_007403	Adam8	chr7:139978932-139992562-
chr11	88182302	88182607	diffreps_peak_30951	0.44503	305	ENSMUST00000132377	Cuedc1	1.43879	0.358898	0.849632	up	Ensembl	347	chr11:88182303-88183280+	exon sense-overlapping	ENSMUST00000018522	Cuedc1	chr11:88099146-88194140+
chr14	55561101	55561480	diffreps_peak_54256	0.402516	379	ENSMUST00000129310	Dcaf11	1.33376	0.395808	0.900598	up	Ensembl	7271	chr14:55560121-55569535+	exon sense-overlapping	ENSMUST00000128490	Dcaf11	chr14:55560971-55563780+
chr4	138228501	138228787	diffreps_peak_127068	2.88373	286	ENSMUST00000154581	Hp1bp3	1.66013	0.00130698	0.00758921	up	Ensembl	3444	chr4:138217268-138229744+	exon sense-overlapping	ENSMUST00000137865	Hp1bp3	chr4:138216626-138226023+
chr5	32973816	32974000	diffreps_peak_132347	1.39878	184	ENSMUST00000127560	Depdc5	1.8404	0.0399226	0.160813	up	Ensembl	583	chr5:32967719-32974176+	exon sense-overlapping	ENSMUST00000119705	Depdc5	chr5:32863734-32991668+
chr17	47688421	47688620	diffreps_peak_78147	0.728559	199	ENSMUST00000143789	Gm21981	3.17451	0.186828	0.546883	up	Ensembl	2721	chr17:47686739-47694455-	exon sense-overlapping	ENSMUST00000113301	Tomm6	chr17:47686740-47688068-
chr15	78120021	78120260	diffreps_peak_62892	0.119831	239	uc007woq.1	AK043153	1.17273	0.758874	1	up	UCSC_knowngene	2124	chr15:78119706-78144142+	natural antisense	ENSMUST00000019290	Cacng2	chr15:77991748-78120028-
chr7	30522101	30522193	diffreps_peak_157710	1.12141	92	NR_036630	Arhgap33os	1.85552	0.0756116	0.272896	up	RefSeq	2668	chr7:30515122-30522193+	intergenic
chrX	20391861	20392200	diffreps_peak_189410	8.416	339	ENSMUST00000117464	Gm14537	715.2	3.83709e-09	1.60662e-07	up	Ensembl	599	chrX:20391709-20392501+	intron sense-overlapping	NM_001290644	Rp2h	chrX:20364481-20400858+
chr17	32047673	32047760	diffreps_peak_76132	7.93993	87	ENSMUST00000151808	Rrp1b	698.8	1.14833e-08	2.78818e-07	up	Ensembl	719	chr17:32036429-32047915+	exon sense-overlapping	NM_028244	Rrp1b	chr17:32036162-32062862+
chr9	75314063	75314440	diffreps_peak_184680	1.95018	377	uc009qrz.1	AK134928	1.19521	0.0112154	0.0534387	up	UCSC_knowngene	1377	chr9:75310335-75314871-	natural antisense	ENSMUST00000076889	Gnb5	chr9:75311395-75344964+
chr12	3835026	3835340	diffreps_peak_35866	0.166662	314	ENSMUST00000173700	Dnmt3a	1.0753	0.6813	1	up	Ensembl	4014	chr12:3806007-3838814+	intron sense-overlapping	ENSMUST00000172509	Dnmt3a	chr12:3807058-3896995+
chr5	120132901	120133260	diffreps_peak_139197	8.45099	359	ENSMUST00000181905	Gm10390	661.3	3.54004e-09	1.60662e-07	up	Ensembl	4269	chr5:120131485-120139263-	natural antisense	ENSMUST00000031590	Rbm19	chr5:120116510-120197979+
chr17	46125081	46125413	diffreps_peak_77712	0.889919	332	ENSMUST00000134237	Mrps18a	1.97862	0.128849	0.412319	up	Ensembl	903	chr17:46122803-46128870+	exon sense-overlapping	NM_026768	Mrps18a	chr17:46111004-46128908+
chr16	4935361	4935640	diffreps_peak_66442	0.00224256	279	NR_037666	Gm16861	1.00355	0.99485	1	up	RefSeq	1531	chr16:4935164-4939585-	intronic antisense	ENSMUST00000023159	Mgrn1	chr16:4886100-4938296+
chr2	32371834	32372000	diffreps_peak_95356	0.273947	166	ENSMUST00000145957	Ciz1	1.28779	0.532173	1	up	Ensembl	876	chr2:32371835-32374556+	exon sense-overlapping	ENSMUST00000151806	Ciz1	chr2:32367472-32372305+
chr4	69925581	69925780	diffreps_peak_121510	0.0606042	199	ENSMUST00000056452	Gm11223	1.03347	0.869753	1	up	Ensembl	971	chr4:69925201-69926171-	intergenic
chr1	165460941	165461240	diffreps_peak_11145	0.354395	299	uc007djc.1	AK008044	1.51211	0.442186	0.961782	up	UCSC_knowngene	4015	chr1:165460637-165464651+	exon sense-overlapping	NM_027430	Mpc2	chr1:165461208-165481214+
chr16	30569101	30569248	diffreps_peak_68740	7.96231	147	ENSMUST00000144666	Lsg1	656.5	1.09067e-08	2.71474e-07	up	Ensembl	2724	chr16:30568013-30587592-	exon sense-overlapping	ENSMUST00000117363	Lsg1	chr16:30560494-30587592-
chr11	102762088	102762280	diffreps_peak_32994	0.125343	192	ENSMUST00000124879	Adam11	1.27338	0.749303	1	up	Ensembl	514	chr11:102762089-102771474+	exon sense-overlapping	NM_001110778	Adam11	chr11:102761439-102780262+
chr4	117285121	117285320	diffreps_peak_124269	0.886559	199	ENSMUST00000154974	Rnf220	1.35568	0.12985	0.414609	up	Ensembl	1492	chr4:117285092-117289442-	exon sense-overlapping	ENSMUST00000102690	Rnf220	chr4:117271464-117288772-
chr8	70222517	70222700	diffreps_peak_173162	8.46923	183	ENSMUST00000139765	Armc6	634.4	3.39447e-09	1.60662e-07	up	Ensembl	1090	chr8:70220198-70222789-	exon sense-overlapping	ENSMUST00000019679	Armc6	chr8:70220172-70234466-
chr2	160754760	160754980	diffreps_peak_104435	0.513949	220	ENSMUST00000129568	Plcg1	1.80984	0.306233	0.766674	up	Ensembl	545	chr2:160754547-160755169+	exon sense-overlapping	NM_021280	Plcg1	chr2:160731310-160775760+
chr4	154645221	154645440	diffreps_peak_129375	0.0361265	219	ENSMUST00000183838	RP23-360O1.5	1.15749	0.920181	1	up	Ensembl	512	chr4:154645083-154645701-	intergenic
chr2	32297107	32297253	diffreps_peak_95249	0.306622	146	ENSMUST00000127276	Golga2	1.22062	0.493603	1	up	Ensembl	384	chr2:32288326-32297253+	exon sense-overlapping	ENSMUST00000147707	Golga2	chr2:32288349-32299310+
chr2	102737906	102738087	diffreps_peak_99999	2.23289	181	ENSMUST00000137123	Gm13872	1.45937	0.00584938	0.0298182	up	Ensembl	330	chr2:102737907-102746759-	natural antisense	ENSMUST00000123759	Slc1a2	chr2:102706356-102739876+
chr1	133269423	133269660	diffreps_peak_8939	0.472417	237	NR_037984	Gm19461	2.3155	0.336964	0.815053	up	RefSeq	3112	chr1:133249852-133269808-	intronic antisense	ENSMUST00000105082	Plekha6	chr1:133246097-133303435+
chr11	50207159	50207319	diffreps_peak_26586	0.635774	160	ENSMUST00000154805	Sqstm1	1.21633	0.231327	0.638968	up	Ensembl	585	chr11:50205679-50207319-	exon sense-overlapping	ENSMUST00000102774	Sqstm1	chr11:50200152-50210827-
chr9	88391141	88391340	diffreps_peak_185330	0.778165	199	ENSMUST00000085262	Gm10163	1.66788	0.166661	0.502138	up	Ensembl	545	chr9:88390807-88391351+	intronic antisense	ENSMUST00000174806	Snx14	chr9:88376767-88438914-
chr10	80395063	80395326	diffreps_peak_19111	0.820435	263	ENSMUST00000125618	Mbd3	1.50235	0.151205	0.466294	up	Ensembl	530	chr10:80393895-80395326-	exon sense-overlapping	ENSMUST00000105348	Mbd3	chr10:80392839-80399422-
chr19	4158609	4158919	diffreps_peak_87251	1.17455	310	ENSMUST00000130469	Rps6kb2	1.58214	0.0669029	0.246773	up	Ensembl	1979	chr19:4156795-4163300-	exon sense-overlapping	NM_021485	Rps6kb2	chr19:4156977-4163245-
chr2	180175241	180175720	diffreps_peak_106577	1.44787	479	ENSMUST00000128029	Adrm1	1.75253	0.0356556	0.145981	up	Ensembl	2576	chr2:180171606-180176284+	exon sense-overlapping	ENSMUST00000061437	Adrm1	chr2:180171485-180176286+
chr7	141612704	141612880	diffreps_peak_167393	0.46129	176	NR_040337	Gm16982	1.24459	0.345708	0.829381	up	RefSeq	2620	chr7:141610066-141613747-	natural antisense	NM_007459	Ap2a2	chr7:141562180-141633011+
chr2	122353764	122354131	diffreps_peak_101374	1.16897	367	ENSMUST00000135848	Shf	2.01045	0.0677691	0.249449	up	Ensembl	403	chr2:122349504-122354131-	exon sense-overlapping	ENSMUST00000125826	Shf	chr2:122349128-122369162-
chr7	100121341	100121458	diffreps_peak_163847	0.665828	117	ENSMUST00000156202	Pold3	1.21483	0.21586	0.608163	up	Ensembl	607	chr7:100099508-100121458-	exon sense-overlapping	NM_133692	Pold3	chr7:100082113-100121500-
chr11	82901556	82901800	diffreps_peak_30507	0.198778	244	ENSMUST00000124109	Nle1	1.39228	0.632736	1	up	Ensembl	539	chr11:82900772-82901816-	exon sense-overlapping	NM_145431	Nle1	chr11:82900768-82908395-
chr7	30193861	30194080	diffreps_peak_157630	0.0893808	219	ENSMUST00000146852	Capns1	1.21039	0.81399	1	up	Ensembl	587	chr7:30193546-30195036-	exon sense-overlapping	NM_009795	Capns1	chr7:30186942-30195048-
chr10	76785070	76785214	diffreps_peak_18425	0.394627	144	uc007fuy.2	Pcbp3	1.42324	0.403063	0.91036	up	UCSC_knowngene	1740	chr10:76761854-76822797-	exon sense-overlapping	NM_021568	Pcbp3	chr10:76761854-76961947-
chr6	124959521	124959740	diffreps_peak_152354	0.341555	219	ENSMUST00000135645	Cops7a	1.26502	0.455455	0.977247	up	Ensembl	768	chr6:124959234-124960141-	exon sense-overlapping	NM_001164089	Cops7a	chr6:124958411-124965529-
chr2	28549401	28549600	diffreps_peak_94602	0.434446	199	ENSMUST00000137513	Ralgds	1.43168	0.367751	0.861956	up	Ensembl	4409	chr2:28533549-28553070+	exon sense-overlapping	ENSMUST00000113893	Ralgds	chr2:28533355-28553066+
chr3	96170981	96171260	diffreps_peak_112728	8.02224	279	uc029unt.1	AK090257	612.5	9.5008e-09	2.48882e-07	up	UCSC_knowngene	1558	chr3:96170874-96172431-	natural antisense	ENSMUST00000054356	Mtmr11	chr3:96162004-96171718+
chr5	3236481	3236680	diffreps_peak_129778	0.0474841	199	ENSMUST00000078810	Gm15772	1.05474	0.896429	1	up	Ensembl	519	chr5:3236389-3236907+	intergenic
chr11	120787768	120787960	diffreps_peak_35625	0.802779	192	ENSMUST00000156723	Gps1	3.03095	0.157478	0.481073	up	Ensembl	567	chr11:120787769-120788596+	exon sense-overlapping	ENSMUST00000116305	Gps1	chr11:120784305-120789102+
chr4	109403801	109403993	diffreps_peak_123782	0.0450096	192	NR_131195	Gm12750	1.01815	0.901551	1	up	RefSeq	2532	chr4:109402279-109406257-	bidirectional	ENSMUST00000124209	Ttc39a	chr4:109406623-109428134+
chr11	32588601	32588950	diffreps_peak_25453	8.51407	349	ENSMUST00000143397	Stk10	612.3	3.06144e-09	1.60662e-07	up	Ensembl	663	chr11:32588595-32598528+	exon sense-overlapping	ENSMUST00000102821	Stk10	chr11:32533305-32624587+
chr4	135323767	135323880	diffreps_peak_126629	4.67127	113	ENSMUST00000136570	Srrm1	1.60319	2.13173e-05	0.000158101	up	Ensembl	373	chr4:135323768-135324849-	exon sense-overlapping	ENSMUST00000105861	Srrm1	chr4:135320484-135353321-
chr9	112182979	112183100	diffreps_peak_187458	0.441684	121	ENSMUST00000159444	Arpp21	1.46083	0.361673	0.853382	up	Ensembl	837	chr9:112182980-112185936-	exon sense-overlapping	NM_001177620	Arpp21	chr9:112180032-112187929-
chr10	20266521	20266840	diffreps_peak_14458	1.00277	319	uc007ens.1	AK043723	1.41238	0.0993649	0.339927	up	UCSC_knowngene	1244	chr10:20266478-20286631-	natural antisense	ENSMUST00000116259	Map7	chr10:20148920-20281589+
chr11	94411438	94411679	diffreps_peak_31372	0.0825666	241	ENSMUST00000133331	Cacna1g	1.1579	0.826863	1	up	Ensembl	434	chr11:94409854-94411679-	exon sense-overlapping	ENSMUST00000107792	Cacna1g	chr11:94408391-94474100-
chr3	88643081	88643216	diffreps_peak_111883	0.152324	135	ENSMUST00000177099	Arhgef2	1.05555	0.704168	1	up	Ensembl	702	chr3:88642426-88643912+	exon sense-overlapping	NM_001198913	Arhgef2	chr3:88621394-88648052+
chr7	49575441	49575780	diffreps_peak_159976	0.0476865	339	ENSMUST00000184102	Nav2	1.0325	0.896011	1	up	Ensembl	1466	chr7:49575140-49576605+	exon sense-overlapping	NM_001111016	Nav2	chr7:48959073-49610088+
chr16	30540741	30540960	diffreps_peak_68734	0.0188418	219	ENSMUST00000125260	Tmem44	1.02488	0.957543	1	up	Ensembl	3875	chr16:30517730-30550539-	exon sense-overlapping	ENSMUST00000140402	Tmem44	chr16:30513691-30550578-
chrX	108834098	108834372	diffreps_peak_194291	0.666484	274	ENSMUST00000041866	Brwd3	2.03122	0.215534	0.607518	up	Ensembl	5839	chrX:108742568-108834372-	exon sense-overlapping	ENSMUST00000101283	Brwd3	chrX:108820897-108834346-
chr6	47453775	47453900	diffreps_peak_146368	7.97353	125	ENSMUST00000064013	A930035D04Rik	604.6	1.06284e-08	2.67512e-07	up	Ensembl	543	chr6:47453776-47454320-	natural antisense	ENSMUST00000152547	Cul1	chr6:47453492-47484965+
chr11	120719941	120720180	diffreps_peak_35600	0.14667	239	ENSMUST00000155187	Lrrc45	1.17091	0.713396	1	up	Ensembl	898	chr11:120719731-120720912+	exon sense-overlapping	ENSMUST00000026139	Lrrc45	chr11:120713925-120721128+
chr11	69346301	69346500	diffreps_peak_28449	0.254487	199	ENSMUST00000146930	Chd3	1.61333	0.556561	1	up	Ensembl	747	chr11:69346136-69347134-	exon sense-overlapping	ENSMUST00000108661	Chd3	chr11:69343273-69369406-
chr2	156612944	156613100	diffreps_peak_104047	0.0565364	156	NR_040372	Gm14169	1.16701	0.877938	1	up	RefSeq	2543	chr2:156609198-156613422-	bidirectional	NM_001277186	Dlgap4	chr2:156613697-156764363+
chrX	7810721	7810848	diffreps_peak_188798	0.523121	127	ENSMUST00000135622	Gripap1	1.58552	0.299833	0.756231	up	Ensembl	2252	chrX:7798447-7810848+	exon sense-overlapping	NM_001290455	Gripap1	chrX:7789993-7820567+
chr6	142815701	142816020	diffreps_peak_153420	8.24752	319	ENSMUST00000159599	Gm7457	600.9	5.65556e-09	1.86728e-07	up	Ensembl	1847	chr6:142814385-142816955+	intergenic
chr5	145126861	145127060	diffreps_peak_143121	0.766535	199	ENSMUST00000128229	Arpc1b	2.26292	0.171185	0.512137	up	Ensembl	680	chr5:145125891-145127330+	exon sense-overlapping	NM_023142	Arpc1b	chr5:145114256-145128186+
chr11	116679906	116680080	diffreps_peak_34592	0.0834157	174	ENSMUST00000144398	St6galnac2	1.11031	0.825248	1	up	Ensembl	1683	chr11:116677483-116681290-	exon sense-overlapping	NM_009180	St6galnac2	chr11:116676705-116694660-
chr7	126797821	126798020	diffreps_peak_166096	0.0191341	199	ENSMUST00000139657	Aldoa	1.03706	0.956899	1	up	Ensembl	1352	chr7:126795949-126798307-	exon sense-overlapping	ENSMUST00000032934	Aldoa	chr7:126795234-126799254-
chr1	87420210	87420392	diffreps_peak_5924	1.09078	182	ENSMUST00000172776	Gigyf2	1.36905	0.0811379	0.28922	up	Ensembl	558	chr1:87420211-87421866+	exon sense-overlapping	ENSMUST00000172794	Gigyf2	chr1:87327029-87449145+
chr5	145178241	145178440	diffreps_peak_143141	8.54309	199	ENSMUST00000160437	Cpsf4	584.9	2.86357e-09	1.60662e-07	up	Ensembl	2971	chr5:145170543-145182041+	exon sense-overlapping	ENSMUST00000162244	Cpsf4	chr5:145167254-145181753+
chr2	33643181	33643460	diffreps_peak_95595	8.40127	279	NR_046275	C130021I20Rik	575.3	3.96941e-09	1.60662e-07	up	RefSeq	3815	chr2:33641193-33645663+	bidirectional	ENSMUST00000176067	Lmx1b	chr2:33564325-33640480-
chr10	127578521	127578714	diffreps_peak_22981	5.10643	193	ENSMUST00000129877	Lrp1	1.86269	7.82659e-06	6.13368e-05	up	Ensembl	550	chr10:127578329-127581885-	exon sense-overlapping	ENSMUST00000049149	Lrp1	chr10:127538161-127621148-
chr6	138423104	138423220	diffreps_peak_153259	0.721073	116	NR_126072	A830011K09Rik	2.16488	0.190076	0.553877	up	RefSeq	2411	chr6:138423105-138429592+	intronic antisense	ENSMUST00000162932	Lmo3	chr6:138416415-138426816-
chr4	155885661	155885880	diffreps_peak_129673	0.186469	219	ENSMUST00000134678	Cpsf3l	1.09482	0.650924	1	up	Ensembl	2197	chr4:155869546-155888699+	exon sense-overlapping	ENSMUST00000120794	Cpsf3l	chr4:155869546-155888685+
chr11	5997881	5997948	diffreps_peak_24012	0.0394621	67	ENSMUST00000130427	Camk2b	1.03487	0.913141	1	up	Ensembl	412	chr11:5990395-6000448-	exon sense-overlapping	NM_007595	Camk2b	chr11:5969666-6065748-
chr8	41020241	41020540	diffreps_peak_171269	0.0533374	299	ENSMUST00000152188	B430010I23Rik	1.21799	0.884428	1	up	Ensembl	1168	chr8:41017738-41020542+	intronic antisense	NM_001005864	Mtus1	chr8:40990912-41054796-
chr19	6258341	6258433	diffreps_peak_87984	8.28503	92	ENSMUST00000143053	Atg2a	574.4	5.18767e-09	1.7431e-07	up	Ensembl	672	chr19:6258341-6260132+	exon sense-overlapping	ENSMUST00000045351	Atg2a	chr19:6241668-6262335+
chr6	50194461	50194680	diffreps_peak_146754	0.185203	219	ENSMUST00000167319	Mpp6	1.12741	0.652826	1	up	Ensembl	616	chr6:50194416-50198327+	exon sense-overlapping	NM_001164733	Mpp6	chr6:50110241-50198598+
chr4	111807541	111807760	diffreps_peak_123958	0.0102497	219	ENSMUST00000120017	Gm12960	1.04907	0.976675	1	up	Ensembl	1066	chr4:111807358-111808423-	intronic antisense	NM_026470	Spata6	chr4:111720010-111829140+
chr5	122371875	122372080	diffreps_peak_139681	0.417258	205	ENSMUST00000127608	Gpn3	1.26101	0.382597	0.883663	up	Ensembl	2198	chr5:122371876-122382841+	natural antisense	ENSMUST00000031419	Fam216a	chr5:122364580-122372364-
chr2	6872355	6872597	diffreps_peak_92465	0.94808	242	ENSMUST00000183984	Celf2	1.34809	0.112699	0.374467	up	Ensembl	1996	chr2:6546859-6872597-	exon sense-overlapping	ENSMUST00000100429	Celf2	chr2:6539705-6721615-
chr13	55476541	55476773	diffreps_peak_46990	0.254076	232	ENSMUST00000135705	Dbn1	1.18679	0.557088	1	up	Ensembl	2119	chr13:55475125-55488066-	exon sense-overlapping	ENSMUST00000109923	Dbn1	chr13:55473429-55488111-
chr3	85971108	85971420	diffreps_peak_111592	1.28013	312	ENSMUST00000182969	Sh3d19	2.13765	0.0524655	0.202321	up	Ensembl	616	chr3:85971109-86083538+	intronic antisense	ENSMUST00000061343	Prss48	chr3:85993810-86002491-
chr17	25959241	25959440	diffreps_peak_75316	0.512376	199	uc008bcy.1	Capn15	2.55141	0.307343	0.768528	up	UCSC_knowngene	4562	chr17:25958369-25985706-	exon sense-overlapping	ENSMUST00000041641	Capn15	chr17:25959556-25985680-
chr6	125191961	125192208	diffreps_peak_152472	12.5693	247	ENSMUST00000136804	Mrpl51	566.5	2.69603e-13	3.33529e-10	up	Ensembl	855	chr6:125191801-125193558+	exon sense-overlapping	NM_025595	Mrpl51	chr6:125192200-125194392+
chr2	157424827	157424900	diffreps_peak_104179	0.0860462	73	uc012cia.1	Src	1.29004	0.820264	1	up	UCSC_knowngene	307	chr2:157424293-157439277+	exon sense-overlapping	ENSMUST00000029175	Src	chr2:157424280-157471862+
chr5	135045596	135045780	diffreps_peak_141465	0.142246	184	ENSMUST00000144198	Stx1a	1.13701	0.720699	1	up	Ensembl	594	chr5:135041266-135048939+	exon sense-overlapping	NM_016801	Stx1a	chr5:135023572-135051099+
chr8	107042541	107042695	diffreps_peak_176473	8.45911	154	ENSMUST00000132096	Vps4a	550	3.47445e-09	1.60662e-07	up	Ensembl	636	chr8:107042255-107043106+	exon sense-overlapping	NM_126165	Vps4a	chr8:107031326-107045756+
chr2	170387796	170388003	diffreps_peak_105664	0.717312	207	ENSMUST00000147577	Bcas1	1.31323	0.191729	0.557362	up	Ensembl	444	chr2:170386971-170388003-	exon sense-overlapping	ENSMUST00000154650	Bcas1	chr2:170346991-170406509-
chr15	99295241	99295428	diffreps_peak_65506	0.51749	187	ENSMUST00000130575	Prpf40b	2.32161	0.303745	0.762262	up	Ensembl	2740	chr15:99295241-99316114+	exon sense-overlapping	ENSMUST00000118287	Prpf40b	chr15:99303284-99317007+
chr9	110629541	110629668	diffreps_peak_187260	8.07578	127	ENSMUST00000129095	Nbeal2	533.1	8.39878e-09	2.33171e-07	up	Ensembl	664	chr9:110628908-110629668-	exon sense-overlapping	ENSMUST00000131017	Nbeal2	chr9:110625043-110632051-
chr17	15376901	15377120	diffreps_peak_74276	8.39665	219	ENSMUST00000181251	A930024N18Rik	514	4.01188e-09	1.60662e-07	up	Ensembl	3955	chr17:15375000-15379475+	natural antisense	ENSMUST00000014917	Dll1	chr17:15367354-15375976-
chr19	46033881	46034512	diffreps_peak_90727	0.33793	631	ENSMUST00000126320	Ldb1	1.09639	0.459272	0.981801	up	Ensembl	907	chr19:46033745-46034878-	exon sense-overlapping	ENSMUST00000137771	Ldb1	chr19:46033425-46039481-
chr11	115416961	115417018	diffreps_peak_34246	0.00922608	57	ENSMUST00000141474	Atp5h	1.0102	0.97898	1	up	Ensembl	420	chr11:115415689-115417018-	exon sense-overlapping	ENSMUST00000073791	Atp5h	chr11:115415689-115419962-
chr5	64803961	64804116	diffreps_peak_134608	0.0522452	155	ENSMUST00000180470	Gm20033	1.0287	0.886655	1	up	Ensembl	572	chr5:64802473-64804116-	intronic antisense	ENSMUST00000165536	Klf3	chr5:64803523-64830129+
chr7	143323881	143324009	diffreps_peak_167593	8.48114	128	NR_045842	4933417O13Rik	502.9	3.30265e-09	1.60662e-07	up	RefSeq	1526	chr7:143322772-143330650-	intronic antisense	ENSMUST00000009689	Kcnq1	chr7:143107254-143427042+
chr8	125736067	125736240	diffreps_peak_178311	0.320492	173	ENSMUST00000123554	Ntpcr	1.4911	0.478088	1	up	Ensembl	379	chr8:125734233-125736329+	exon sense-overlapping	ENSMUST00000034313	Ntpcr	chr8:125734203-125748235+
chr5	146220801	146220946	diffreps_peak_143218	0.13408	145	ENSMUST00000161725	Rnf6	1.13466	0.734378	1	up	Ensembl	563	chr5:146218079-146220946-	exon sense-overlapping	ENSMUST00000159074	Rnf6	chr5:146211853-146220948-
chr7	16182287	16182440	diffreps_peak_155312	0.193217	153	ENSMUST00000176446	Meis3	1.1825	0.640889	1	up	Ensembl	640	chr7:16179042-16185515+	exon sense-overlapping	ENSMUST00000002495	Meis3	chr7:16175430-16186504+
chr10	93879981	93880138	diffreps_peak_20615	0.0483612	157	ENSMUST00000181104	Metap2	1.03549	0.89462	1	up	Ensembl	931	chr10:93879540-93889761-	exon sense-overlapping	ENSMUST00000180840	Metap2	chr10:93860928-93891202-
chr2	28550261	28550563	diffreps_peak_94604	0.429775	302	ENSMUST00000137513	Ralgds	1.31336	0.371728	0.867666	up	Ensembl	4409	chr2:28533549-28553070+	exon sense-overlapping	ENSMUST00000135803	Ralgds	chr2:28513125-28542950+
chr2	178328101	178328193	diffreps_peak_106409	0.769654	92	ENSMUST00000133267	Phactr3	1.62815	0.16996	0.509355	up	Ensembl	473	chr2:178327792-178332830+	exon sense-overlapping	NM_001177789	Phactr3	chr2:178118975-178338492+
chr2	178331579	178331766	diffreps_peak_106411	0.567875	187	ENSMUST00000141272	Phactr3	1.12175	0.270474	0.706203	up	Ensembl	825	chr2:178327556-178331766+	exon sense-overlapping	ENSMUST00000108917	Phactr3	chr2:178118975-178338492+
chr2	32372261	32372495	diffreps_peak_95361	0.0309043	234	ENSMUST00000145957	Ciz1	1.02968	0.931313	1	up	Ensembl	876	chr2:32371835-32374556+	exon sense-overlapping	NM_028412	Ciz1	chr2:32363198-32378313+
chr16	20177001	20177124	diffreps_peak_68038	0.0119141	123	ENSMUST00000179461	Gm10241	1.00195	0.97294	1	up	Ensembl	994	chr16:20176131-20177124-	intronic antisense	NM_001145930	Yeats2	chr16:20141063-20232573+
chr5	26007026	26007300	diffreps_peak_131671	8.09897	274	ENSMUST00000170449	Gm5067	499.9	7.96219e-09	2.29943e-07	up	Ensembl	1009	chr5:26007027-26008035+	intergenic
chr16	20707572	20707760	diffreps_peak_68167	0.0892517	188	ENSMUST00000153075	Clcn2	1.20525	0.814232	1	up	Ensembl	3511	chr16:20702998-20716164-	natural antisense	ENSMUST00000118919	Fam131a	chr16:20693283-20703044+
chr2	65853381	65853660	diffreps_peak_97620	0.605721	279	ENSMUST00000155722	Gm13619	1.56309	0.247901	0.670246	up	Ensembl	2138	chr2:65852408-65860619-	natural antisense	NM_153409	Csrnp3	chr2:65845767-66031546+
chr7	73454690	73454740	diffreps_peak_161791	0.353468	50	ENSMUST00000181971	Chd2	1.15373	0.44313	0.963016	up	Ensembl	350	chr7:73454328-73455592-	exon sense-overlapping	NM_001081345	Chd2	chr7:73426652-73541746-
chr19	6049581	6049840	diffreps_peak_87923	0.239198	259	ENSMUST00000142101	Syvn1	1.54397	0.576504	1	up	Ensembl	4080	chr19:6047065-6053711+	exon sense-overlapping	ENSMUST00000134667	Syvn1	chr19:6047080-6053709+
chr2	31797562	31797800	diffreps_peak_95112	0.264922	238	ENSMUST00000124726	Abl1	1.35598	0.543348	1	up	Ensembl	847	chr2:31796646-31797992+	exon sense-overlapping	NM_009594	Abl1	chr2:31759939-31804362+
chr11	77489853	77490011	diffreps_peak_29668	0.162786	158	ENSMUST00000180805	2210008F06Rik	1.20112	0.687408	1	up	Ensembl	1082	chr11:77489854-77491409+	bidirectional	ENSMUST00000037593	Ankrd13b	chr11:77470485-77489666-
chr11	69588901	69589260	diffreps_peak_28564	10.9758	359	ENSMUST00000147512	Trp53	494.8	1.05737e-11	4.21886e-09	up	Ensembl	3275	chr11:69580402-69590505+	exon sense-overlapping	NM_011640	Trp53	chr11:69580359-69591873+
chr11	10376769	10377020	diffreps_peak_24291	8.40053	251	ENSMUST00000118697	Gm11997	468.9	3.97626e-09	1.60662e-07	up	Ensembl	313	chr11:10376770-10377082-	intergenic
chr14	68130776	68131000	diffreps_peak_55092	0.429624	224	NR_045897	A230070E04Rik	1.58789	0.371857	0.867867	up	RefSeq	1851	chr14:68123752-68131371+	natural antisense	ENSMUST00000111089	Nefm	chr14:68082590-68124846-
chr6	125097086	125097300	diffreps_peak_152405	0.112763	214	ENSMUST00000155932	Chd4	1.04469	0.771325	1	up	Ensembl	369	chr6:125096177-125097371+	exon sense-overlapping	ENSMUST00000056889	Chd4	chr6:125095981-125130591+
chr7	101291441	101291640	diffreps_peak_163976	0.400676	199	ENSMUST00000134531	Atg16l2	1.88625	0.397488	0.902799	up	Ensembl	878	chr7:101291161-101292146-	exon sense-overlapping	ENSMUST00000122116	Atg16l2	chr7:101289617-101302071-
chr7	4142781	4142929	diffreps_peak_154141	0.00260619	148	ENSMUST00000155881	Leng8	1.0019	0.994017	1	up	Ensembl	559	chr7:4142159-4142929+	exon sense-overlapping	ENSMUST00000144248	Leng8	chr7:4138696-4145528+
chr4	141628401	141628700	diffreps_peak_127678	0.0703657	299	ENSMUST00000136102	Plekhm2	1.02565	0.850422	1	up	Ensembl	902	chr4:141628332-141629536-	exon sense-overlapping	ENSMUST00000030751	Plekhm2	chr4:141625734-141664899-
chr2	156164805	156165140	diffreps_peak_103923	0.124274	335	ENSMUST00000135274	Rbm39	1.06797	0.751149	1	up	Ensembl	695	chr2:156161831-156165212-	exon sense-overlapping	ENSMUST00000146288	Rbm39	chr2:156164806-156180159-
chr4	133012121	133012287	diffreps_peak_126244	0.00367812	166	ENSMUST00000142524	Ahdc1	1.0375	0.991567	1	up	Ensembl	938	chr4:133012092-133061776+	exon sense-overlapping	ENSMUST00000105915	Ahdc1	chr4:133011506-133077863+
chr19	4744421	4744640	diffreps_peak_87408	0.237104	219	uc008gap.1	Rbm14-rbm4	1.16633	0.57929	1	up	UCSC_knowngene	2612	chr19:4742913-4811634-	exon sense-overlapping	NM_001290128	Rbm14-rbm4	chr19:4784293-4811634-
chr10	79736366	79736614	diffreps_peak_18756	0.363344	248	ENSMUST00000159289	Polrmt	1.40522	0.433168	0.950157	up	Ensembl	395	chr10:79736172-79736768-	exon sense-overlapping	NM_172551	Polrmt	chr10:79736125-79746581-
chr11	68946300	68946380	diffreps_peak_28322	1.57706	80	ENSMUST00000151520	Arhgef15	1.39115	0.0264813	0.113313	up	Ensembl	726	chr11:68946301-68947825-	exon sense-overlapping	ENSMUST00000108671	Arhgef15	chr11:68943157-68957480-
chr8	123958341	123958620	diffreps_peak_178142	8.27291	279	uc009nwu.1	AK013187	464.2	5.3345e-09	1.78363e-07	up	UCSC_knowngene	1037	chr8:123949435-123958935+	natural antisense	NM_019552	Abcb10	chr8:123952459-123983122-
chr11	102196781	102196980	diffreps_peak_32804	0.617646	199	ENSMUST00000140481	Hdac5	1.75825	0.241187	0.657636	up	Ensembl	814	chr11:102196681-102198895-	exon sense-overlapping	NM_001284248	Hdac5	chr11:102195747-102230172-
chrX	102050850	102051016	diffreps_peak_193832	8.49257	166	ENSMUST00000144397	Nhsl2	460.1	3.21686e-09	1.60662e-07	up	Ensembl	809	chrX:102050851-102071966+	exon sense-overlapping	ENSMUST00000148044	Nhsl2	chrX:102071370-102076277+
chr13	54683484	54683762	diffreps_peak_46800	2.70745	278	ENSMUST00000128038	Rnf44	1.67984	0.00196132	0.0110207	up	Ensembl	725	chr13:54683485-54684407-	exon sense-overlapping	ENSMUST00000134177	Rnf44	chr13:54683760-54688274-
chr9	120960721	120961000	diffreps_peak_188086	8.22682	279	ENSMUST00000170406	Ulk4	450.4	5.9317e-09	1.93601e-07	up	Ensembl	2639	chr9:120960268-121108525-	natural antisense	ENSMUST00000178812	Ctnnb1	chr9:120933578-120960506+
chr3	108395942	108396120	diffreps_peak_113819	0.119729	178	ENSMUST00000126349	Celsr2	1.0696	0.759051	1	up	Ensembl	664	chr3:108395560-108396493-	exon sense-overlapping	NM_001004177	Celsr2	chr3:108390848-108415494-
chr4	130012275	130012460	diffreps_peak_125959	0.397154	185	ENSMUST00000106012	Bai2	1.11291	0.400725	0.907212	up	Ensembl	874	chr4:130010069-130012546+	exon sense-overlapping	NM_001199696	Adgrb2	chr4:129985078-130022633+
chr1	34118961	34119153	diffreps_peak_2110	0.0689257	192	ENSMUST00000182410	Dst	1.07043	0.853246	1	up	Ensembl	2027	chr1:34089292-34119153+	exon sense-overlapping	ENSMUST00000183331	Dst	chr1:34006127-34135155+
chr19	53767890	53767920	diffreps_peak_91459	8.40115	30	ENSMUST00000161107	Gm16298	431.6	3.97058e-09	1.60662e-07	up	Ensembl	420	chr19:53767891-53768310-	intronic antisense	ENSMUST00000164202	Rbm20	chr19:53677306-53867080+
chr1	86908861	86909360	diffreps_peak_5869	0.996114	499	ENSMUST00000120149	Gm6136	1.97122	0.100899	0.34427	up	Ensembl	891	chr1:86908793-86909683-	intronic antisense	ENSMUST00000168237	Dis3l2	chr1:86703804-87050097+
chr19	6371121	6371320	diffreps_peak_88035	0.0598353	199	ENSMUST00000144239	Sf1	1.01679	0.871294	1	up	Ensembl	785	chr19:6370712-6371694+	exon sense-overlapping	NM_011750	Sf1	chr19:6363690-6378038+
chr4	132541720	132541838	diffreps_peak_126202	0.577295	118	ENSMUST00000144073	Dnajc8	1.50346	0.26467	0.699845	up	Ensembl	452	chr4:132535576-132544199+	exon sense-overlapping	ENSMUST00000105939	Dnajc8	chr4:132535581-132553220+
chr3	133310481	133310720	diffreps_peak_115024	8.40175	239	ENSMUST00000153387	Ppa2	431.2	3.96502e-09	1.60662e-07	up	Ensembl	937	chr3:133310482-133370447+	exon sense-overlapping	ENSMUST00000122334	Ppa2	chr3:133310122-133378235+
chr7	19053601	19053880	diffreps_peak_155807	0.742831	279	ENSMUST00000131230	Sympk	2.16627	0.180788	0.53368	up	Ensembl	636	chr7:19052434-19053884+	exon sense-overlapping	NM_026605	Sympk	chr7:19024377-19054622+
chr7	30292154	30292673	diffreps_peak_157635	4.65869	519	ENSMUST00000145253	Clip3	1.6126	2.19436e-05	0.000162495	up	Ensembl	634	chr7:30291728-30292673+	exon sense-overlapping	ENSMUST00000014065	Clip3	chr7:30291672-30308367+
chr6	8510321	8510430	diffreps_peak_143994	1.00992	109	uc009axp.1	AK039608	1.23026	0.0977423	0.335896	up	UCSC_knowngene	2010	chr6:8488795-8510430-	natural antisense	NM_133236	Glcci1	chr6:8509600-8597549+
chr1	66380488	66381000	diffreps_peak_4215	0.406974	512	ENSMUST00000137807	Map2	1.06769	0.391766	0.895619	up	Ensembl	1091	chr1:66321998-66381291+	exon sense-overlapping	ENSMUST00000114013	Map2	chr1:66321719-66439188+
chr5	136373321	136373460	diffreps_peak_141861	0.0112173	139	ENSMUST00000177414	Cux1	1.06102	0.974502	1	up	Ensembl	347	chr5:136314306-136373461-	exon sense-overlapping	NM_198602	Cux1	chr5:136248135-136567490-
chr17	28201721	28202120	diffreps_peak_75806	0.133765	399	ENSMUST00000145313	Zfp523	1.12024	0.734912	1	up	Ensembl	3350	chr17:28177207-28205886+	exon sense-overlapping	ENSMUST00000002318	Zfp523	chr17:28177418-28205884+
chr4	152411901	152412022	diffreps_peak_129205	6.26854	121	ENSMUST00000162200	Kcnab2	1.59515	5.38845e-07	5.10928e-06	up	Ensembl	543	chr4:152411843-152477544-	exon sense-overlapping	NM_010598	Kcnab2	chr4:152390740-152477549-
chr4	152410987	152411080	diffreps_peak_129204	0.434179	93	ENSMUST00000161416	Gm16333	1.83393	0.367977	0.86203	up	Ensembl	318	chr4:152410800-152411262+	intronic antisense	NM_001252655	Kcnab2	chr4:152390740-152448855-
chr11	94093721	94093940	diffreps_peak_31308	0.201528	219	ENSMUST00000138154	Spag9	1.194	0.628741	1	up	Ensembl	2167	chr11:94071663-94094229+	exon sense-overlapping	NM_001025429	Spag9	chr11:94044205-94126082+
chr9	106157121	106157500	diffreps_peak_186378	0.497959	379	ENSMUST00000150953	D030055H07Rik	2.66109	0.317718	0.78553	up	Ensembl	4325	chr9:106154952-106159751+	natural antisense	NM_174846	Glyctk	chr9:106152860-106158138-
chr10	69991221	69991420	diffreps_peak_17651	0.181329	199	uc007fnn.1	Ank3	1.03041	0.658675	1	up	UCSC_knowngene	7274	chr10:69989935-70027436+	exon sense-overlapping	ENSMUST00000182437	Ank3	chr10:69926133-70023995+
chr2	173586261	173586640	diffreps_peak_105772	0.0516371	379	uc008odz.2	Ppp4r1l-ps	1.03296	0.887898	1	up	UCSC_knowngene	3603	chr2:173585854-173659539-	bidirectional	ENSMUST00000109110	Rab22a	chr2:173659856-173701154+
chr16	33966841	33967100	diffreps_peak_68986	8.50994	259	ENSMUST00000145415	Gm15829	422.3	3.0907e-09	1.60662e-07	up	Ensembl	869	chr16:33966239-33967312+	natural antisense	NM_009471	Umps	chr16:33955012-33967003-
chr6	34747772	34747969	diffreps_peak_145502	0.203282	197	ENSMUST00000146685	Cald1	1.13597	0.626207	1	up	Ensembl	262	chr6:34747773-34753507+	exon sense-overlapping	ENSMUST00000115026	Cald1	chr6:34598565-34775466+
chr11	77850655	77850760	diffreps_peak_29799	0.142661	105	ENSMUST00000130956	Myo18a	1.03022	0.720011	1	up	Ensembl	337	chr11:77850656-77853325+	exon sense-overlapping	ENSMUST00000169105	Myo18a	chr11:77777293-77865143+
chr11	97778441	97778635	diffreps_peak_31961	8.27693	194	ENSMUST00000150955	Rpl23	416.4	5.28534e-09	1.76982e-07	up	Ensembl	480	chr11:97778056-97778635-	exon sense-overlapping	NM_022891	Rpl23	chr11:97777526-97782439-
chr8	25597219	25597580	diffreps_peak_170166	8.19325	361	ENSMUST00000059474	D830025C05Rik	413.2	6.40847e-09	2.04583e-07	up	Ensembl	976	chr8:25597012-25597989+	natural antisense	ENSMUST00000079160	Letm2	chr8:25578492-25597487-
chr4	41891241	41891389	diffreps_peak_118947	0.217382	148	uc029urh.1	AK041157	1.33568	0.606202	1	up	UCSC_knowngene	2888	chr4:41889614-42092128-	intronic antisense	ENSMUST00000098127	Gm10597	chr4:42035113-42035538+
chr17	46824241	46824820	diffreps_peak_77978	7.09862	579	ENSMUST00000181301	Gm26904	1.85097	7.96848e-08	9.9583e-07	up	Ensembl	1742	chr17:46471501-46825221+	intron sense-overlapping	NM_001277309	Mea1	chr17:46680986-46683126+
chr2	59214933	59215080	diffreps_peak_97235	0.98	147	uc008jte.1	Pkp4	1.40157	0.104713	0.354848	up	UCSC_knowngene	1094	chr2:59200773-59215460+	exon sense-overlapping	ENSMUST00000123908	Pkp4	chr2:59160882-59338873+
chr11	6015421	6015509	diffreps_peak_24029	0.771347	88	ENSMUST00000129098	Camk2b	2.27911	0.169298	0.50827	up	Ensembl	4125	chr11:6011665-6065658-	exon sense-overlapping	ENSMUST00000109815	Camk2b	chr11:5969672-6065563-
chr5	49552441	49552720	diffreps_peak_133800	0.0585871	279	ENSMUST00000120352	Gm5555	1.04797	0.873802	1	up	Ensembl	1014	chr5:49552257-49553270+	intergenic
chr3	86672032	86672168	diffreps_peak_111621	0.259995	136	ENSMUST00000119949	Gm3788	1.28974	0.549547	1	up	Ensembl	136	chr3:86672033-86672168-	intronic antisense	NM_001077687	Lrba	chr3:86224690-86746710+
chr13	9690021	9690240	diffreps_peak_43946	0.0577161	219	ENSMUST00000137932	Zmynd11	1.06556	0.875556	1	up	Ensembl	4355	chr13:9684841-9691273-	exon sense-overlapping	ENSMUST00000110635	Zmynd11	chr13:9684841-9764470-
chr7	29155721	29155980	diffreps_peak_157467	0.013235	259	ENSMUST00000150431	Fam98c	1.01893	0.969985	1	up	Ensembl	1632	chr7:29152512-29156183-	natural antisense	NM_001174155	Rasgrp4	chr7:29134933-29153955+
chr17	7946201	7946426	diffreps_peak_73721	0.999394	225	uc008aiq.1	AK051008	1.40164	0.10014	0.342142	up	UCSC_knowngene	2050	chr17:7881106-7946426-	natural antisense	ENSMUST00000097423	Rsph3a	chr17:7945653-7979824+
chr11	102205061	102205380	diffreps_peak_32820	0.391279	319	ENSMUST00000149087	Hdac5	1.93585	0.406183	0.914786	up	Ensembl	5406	chr11:102195749-102218929-	exon sense-overlapping	NM_010412	Hdac5	chr11:102195747-102230172-
chr4	34614977	34615060	diffreps_peak_118342	8.34876	83	ENSMUST00000155133	Rars2	409.4	4.4796e-09	1.60662e-07	up	Ensembl	683	chr4:34614978-34623435+	exon sense-overlapping	ENSMUST00000029968	Rars2	chr4:34614957-34660167+
chr7	44853881	44854108	diffreps_peak_159066	0.178034	227	ENSMUST00000142880	Akt1s1	1.20183	0.663691	1	up	Ensembl	422	chr7:44852920-44854644+	exon sense-overlapping	ENSMUST00000107882	Akt1s1	chr7:44849629-44854736+
chr17	35703895	35704160	diffreps_peak_76928	0.0596788	265	ENSMUST00000135203	Gm4577	1.04754	0.871608	1	up	Ensembl	716	chr17:35703896-35708244+	natural antisense	NM_172962	Ddr1	chr17:35681567-35704139-
chr2	156533661	156533867	diffreps_peak_104016	0.0588546	206	ENSMUST00000137067	Epb4.1l1	1.01046	0.873264	1	up	Ensembl	820	chr2:156533507-156539986+	exon sense-overlapping	ENSMUST00000109574	Epb4.1l1	chr2:156421048-156543214+
chr15	83608217	83608500	diffreps_peak_64001	7.08467	283	ENSMUST00000144773	Scube1	1.6104	8.22865e-08	1.02029e-06	up	Ensembl	5840	chr15:83604999-83725021-	exon sense-overlapping	NM_001271472	Scube1	chr15:83602583-83725039-
chr2	25305081	25305397	diffreps_peak_93989	1.28187	316	ENSMUST00000153551	Grin1	1.15353	0.052255	0.202151	up	Ensembl	731	chr2:25303584-25305397-	exon sense-overlapping	ENSMUST00000114314	Grin1	chr2:25291181-25319120-
chr8	34054621	34054758	diffreps_peak_170836	8.22983	137	ENSMUST00000149618	Gm9951	403.7	5.89074e-09	1.92598e-07	up	Ensembl	1772	chr8:34054622-34057046+	intergenic
chr4	133256661	133256960	diffreps_peak_126344	8.46523	299	ENSMUST00000142039	Sytl1	398.6	3.42583e-09	1.60662e-07	up	Ensembl	2484	chr4:133253098-133263087-	exon sense-overlapping	ENSMUST00000030674	Sytl1	chr4:133253090-133263113-
chr6	51470681	51470980	diffreps_peak_146795	0.364641	299	ENSMUST00000156463	Cbx3	1.38502	0.431876	0.948358	up	Ensembl	1217	chr6:51470663-51475241+	exon sense-overlapping	ENSMUST00000141711	Cbx3	chr6:51470746-51478600+
chr11	77842401	77842640	diffreps_peak_29765	0.235048	239	ENSMUST00000100443	Myo18a	1.1228	0.582039	1	up	Ensembl	3807	chr11:77840933-77844878+	exon sense-overlapping	NM_001291215	Myo18a	chr11:77801298-77865988+
chr2	154888041	154888360	diffreps_peak_103572	3.35919	319	ENSMUST00000135524	Eif2s2	1.59319	0.000437326	0.00274797	up	Ensembl	4102	chr2:154884378-154892808-	exon sense-overlapping	ENSMUST00000161172	Eif2s2	chr2:154884375-154892795-
chr15	75565582	75565880	diffreps_peak_62277	0.574088	298	ENSMUST00000150125	Ly6h	1.12626	0.266632	0.701693	up	Ensembl	847	chr15:75565213-75566632-	exon sense-overlapping	NM_001135688	Ly6h	chr15:75564745-75566856-
chr8	93811693	93811980	diffreps_peak_175592	0.0655276	287	NR_026888	4930488L21Rik	1.03303	0.859948	1	up	RefSeq	1862	chr8:93811694-93813555-	intronic antisense	ENSMUST00000125716	Gnao1	chr8:93810840-93968956+
chr2	30355235	30355402	diffreps_peak_94891	0.343646	167	ENSMUST00000139963	Sh3glb2	1.2339	0.453267	0.974986	up	Ensembl	1189	chr2:30349740-30359260-	exon sense-overlapping	ENSMUST00000163668	Sh3glb2	chr2:30344811-30359289-
chrX	101416908	101417280	diffreps_peak_193776	0.25097	372	ENSMUST00000141895	Zmym3	1.23387	0.561086	1	up	Ensembl	1773	chrX:101414929-101417376-	exon sense-overlapping	ENSMUST00000121429	Zmym3	chrX:101414933-101420685-
chrX	102005043	102005143	diffreps_peak_193830	0.544538	100	ENSMUST00000144753	Nhsl2	2.11473	0.285406	0.732973	up	Ensembl	475	chrX:102005044-102077856+	intronic antisense	NM_001278534	Rgag4	chrX:102066542-102071307-
chr2	31105241	31105450	diffreps_peak_95047	0.0619646	209	ENSMUST00000136085	Fnbp1	1.05958	0.867033	1	up	Ensembl	350	chr2:31096091-31105450-	exon sense-overlapping	ENSMUST00000113559	Fnbp1	chr2:31026207-31096500-
chr7	104501821	104502120	diffreps_peak_164309	0.627559	299	ENSMUST00000117815	Gm16464	1.7084	0.235744	0.647752	up	Ensembl	1095	chr7:104501055-104502149-	intron sense-overlapping	NM_199146	Trim30d	chr7:104470014-104507849-
chr2	120850161	120850435	diffreps_peak_101118	0.00324795	274	ENSMUST00000141921	Ttbk2	1.03687	0.992549	1	up	Ensembl	850	chr2:120790340-120850435-	exon sense-overlapping	ENSMUST00000131389	Ttbk2	chr2:120750234-120850364-
chr2	30237641	30237777	diffreps_peak_94863	0.107479	136	ENSMUST00000063984	1700084E18Rik	1.02852	0.780766	1	up	Ensembl	729	chr2:30237493-30238223-	natural antisense	ENSMUST00000113654	Lrrc8a	chr2:30237715-30263785+
chr4	41763824	41763960	diffreps_peak_118889	8.2987	136	ENSMUST00000140894	Il11ra1	396.1	5.02695e-09	1.70217e-07	up	Ensembl	325	chr4:41760512-41764009+	exon sense-overlapping	ENSMUST00000108042	Il11ra1	chr4:41762309-41769474+
chr8	121590476	121590760	diffreps_peak_177625	3.14259	284	ENSMUST00000181826	Map1lc3b	1.73767	0.000720137	0.00437034	up	Ensembl	2633	chr8:121590477-121593109+	exon sense-overlapping	NM_026160	Map1lc3b	chr8:121590468-121598047+
chr3	90088261	90088460	diffreps_peak_112249	0.0407226	199	ENSMUST00000131354	Tpm3	1.06354	0.910495	1	up	Ensembl	2374	chr3:90079665-90089596+	exon sense-overlapping	NM_001253738	Tpm3	chr3:90079521-90100902+
chr10	81251221	81251460	diffreps_peak_19546	0.00792972	239	ENSMUST00000132174	Zfr2	1.03104	0.981907	1	up	Ensembl	4525	chr10:81233187-81252121+	exon sense-overlapping	ENSMUST00000117798	Zfr2	chr10:81233155-81252123+
chr16	30066421	30066542	diffreps_peak_68716	8.40463	121	ENSMUST00000161839	Hes1	394.6	3.93887e-09	1.60662e-07	up	Ensembl	653	chr16:30066338-30067319+	exon sense-overlapping	NM_008235	Hes1	chr16:30065357-30067796+
chr11	87589655	87590055	diffreps_peak_30806	0.290935	400	ENSMUST00000132723	Sept4	1.21898	0.511759	1	up	Ensembl	1884	chr11:87578447-87590539+	exon sense-overlapping	ENSMUST00000107960	Sept4	chr11:87581061-87590539+
chr11	100710381	100710600	diffreps_peak_32516	0.0821798	219	uc007lmc.2	Kat2a	1.11409	0.827599	1	up	UCSC_knowngene	3240	chr11:100704746-100712467-	exon sense-overlapping	ENSMUST00000006973	Kat2a	chr11:100704746-100712465-
chr2	20661897	20662100	diffreps_peak_93459	0.047324	203	ENSMUST00000123383	Etl4	1.03432	0.896759	1	up	Ensembl	514	chr2:20548022-20662316+	exon sense-overlapping	NM_001177631	Etl4	chr2:20519513-20810535+
chr2	156533761	156533867	diffreps_peak_104017	1.69803	106	ENSMUST00000137067	Epb4.1l1	1.41889	0.0200436	0.0890864	up	Ensembl	820	chr2:156533507-156539986+	exon sense-overlapping	NM_013510	Epb4.1l1	chr2:156420909-156543214+
chr16	96184041	96184114	diffreps_peak_73042	8.42615	73	uc008act.1	Lca5l	376.2	3.74847e-09	1.60662e-07	up	UCSC_knowngene	2208	chr16:96181433-96192257-	exon sense-overlapping	ENSMUST00000113804	Lca5l	chr16:96158407-96192250-
chr4	142143293	142143420	diffreps_peak_127774	1.16949	127	ENSMUST00000148812	Kazn	2.70362	0.0676878	0.249199	up	Ensembl	5725	chr4:142139244-142146465-	exon sense-overlapping	ENSMUST00000172864	Kazn	chr4:142140808-142210206-
chrX	136214661	136214980	diffreps_peak_195485	0.114505	319	ENSMUST00000142172	Bex1	1.12765	0.768237	1	up	Ensembl	481	chrX:136214544-136215380-	natural antisense	ENSMUST00000126811	Tceal7	chrX:136214779-136225387+
chr2	118872181	118872220	diffreps_peak_100922	0.431823	39	ENSMUST00000141836	Ivd	1.6236	0.369979	0.865	up	Ensembl	266	chr2:118871378-118872277+	exon sense-overlapping	NM_019826	Ivd	chr2:118862000-118881357+
chr2	37703048	37703149	diffreps_peak_95897	0.274822	101	ENSMUST00000144206	Strbp	1.16854	0.531102	1	up	Ensembl	398	chr2:37647120-37703149-	exon sense-overlapping	ENSMUST00000155237	Strbp	chr2:37640855-37703859-
chr10	117361181	117361420	diffreps_peak_22052	0.348693	239	ENSMUST00000176567	Cpsf6	1.25356	0.44803	0.968792	up	Ensembl	2749	chr10:117358892-117363233-	exon sense-overlapping	ENSMUST00000176686	Cpsf6	chr10:117349039-117376973-
chr2	32575501	32575807	diffreps_peak_95397	7.97631	306	ENSMUST00000134204	Pip5kl1	372.818	1.05605e-08	2.66389e-07	up	Ensembl	640	chr2:32574797-32575807+	natural antisense	ENSMUST00000100190	9430097D07Rik	chr2:32574184-32575684-
chr11	69908281	69908521	diffreps_peak_28713	1.64218	240	ENSMUST00000153041	Neurl4	1.69296	0.0227941	0.0997035	up	Ensembl	752	chr11:69907264-69908521+	exon sense-overlapping	NM_001291118	Neurl4	chr11:69901816-69913824+
chr11	69088542	69088920	diffreps_peak_28343	1.78568	378	ENSMUST00000149559	Vamp2	1.52642	0.0163803	0.0745965	up	Ensembl	918	chr11:69088543-69090050+	exon sense-overlapping	NM_009497	Vamp2	chr11:69088528-69092381+
chr17	35004771	35005061	diffreps_peak_76742	0.433752	290	ENSMUST00000172656	Vars	1.47288	0.36834	0.862557	up	Ensembl	475	chr17:35004294-35005061+	exon sense-overlapping	ENSMUST00000172570	Vars	chr17:35002657-35004852+
chr17	35138821	35138965	diffreps_peak_76769	0.0647122	144	ENSMUST00000172889	Bag6	1.07409	0.861565	1	up	Ensembl	611	chr17:35136123-35138965+	exon sense-overlapping	ENSMUST00000173550	Bag6	chr17:35135744-35147320+
chr15	79131715	79131888	diffreps_peak_63141	0.258617	173	uc007wsq.2	Micall1	1.35486	0.551294	1	up	UCSC_knowngene	4122	chr15:79131716-79136901+	natural antisense	ENSMUST00000169604	1700088E04Rik	chr15:79134655-79141251-
chr14	119099761	119100075	diffreps_peak_57638	0.502113	314	uc007uzm.1	AK147121	1.73277	0.314693	0.780446	up	UCSC_knowngene	2809	chr14:119098965-119115074+	natural antisense	ENSMUST00000156203	Uggt2	chr14:118985039-119099430-
chr19	7284464	7284640	diffreps_peak_88335	0.713573	176	ENSMUST00000170768	Mark2	1.69372	0.193387	0.560996	up	Ensembl	516	chr19:7283137-7284778-	exon sense-overlapping	ENSMUST00000165286	Mark2	chr19:7276849-7341804-
chr11	61453341	61453659	diffreps_peak_27726	0.301968	318	ENSMUST00000130648	Rnf112	1.32891	0.498921	1	up	Ensembl	882	chr11:61452916-61453933-	exon sense-overlapping	ENSMUST00000054927	Rnf112	chr11:61448442-61454005-
chr13	54682646	54682950	diffreps_peak_46798	0.519745	304	ENSMUST00000145215	Rnf44	1.10583	0.302172	0.760212	up	Ensembl	758	chr13:54682647-54684072-	exon sense-overlapping	ENSMUST00000150626	Rnf44	chr13:54684050-54688273-
chr4	154367173	154367312	diffreps_peak_129350	0.530303	139	ENSMUST00000141164	Prdm16	1.62782	0.294915	0.747692	up	Ensembl	8602	chr4:154316125-154636866-	exon sense-overlapping	ENSMUST00000105638	Prdm16	chr4:154316125-154636866-
chr2	29914230	29914380	diffreps_peak_94748	0.508647	150	ENSMUST00000131165	Odf2	1.22852	0.309994	0.772922	up	Ensembl	553	chr2:29912624-29915277+	exon sense-overlapping	NM_001177659	Odf2	chr2:29889720-29931746+
chr15	81008288	81008560	diffreps_peak_63573	0.0716706	272	ENSMUST00000138550	Sgsm3	1.12593	0.84787	1	up	Ensembl	1078	chr15:81007938-81009950+	exon sense-overlapping	ENSMUST00000139517	Sgsm3	chr15:80977765-81012289+
chr9	61412041	61412460	diffreps_peak_183587	0.301445	419	ENSMUST00000159140	Tle3	1.30552	0.499523	1	up	Ensembl	8638	chr9:61402461-61417835+	exon sense-overlapping	NM_009389	Tle3	chr9:61372366-61418497+
chr9	21281581	21282040	diffreps_peak_179994	0.428468	459	ENSMUST00000183912	Kri1	1.2842	0.372848	0.869359	up	Ensembl	2509	chr9:21278953-21287969-	exon sense-overlapping	ENSMUST00000184326	Kri1	chr9:21273636-21287953-
chr10	79908621	79908818	diffreps_peak_18875	0.0732582	197	ENSMUST00000163125	Med16	1.05411	0.844776	1	up	Ensembl	2065	chr10:79901838-79908818-	exon sense-overlapping	ENSMUST00000166964	Med16	chr10:79903355-79908321-
chr18	43473621	43473684	diffreps_peak_84230	0.771142	63	ENSMUST00000180600	Gm3650	2.40256	0.169378	0.508416	up	Ensembl	747	chr18:43472816-43475169+	intergenic
chr11	52283901	52284300	diffreps_peak_26779	8.51466	399	ENSMUST00000150973	A630014C17Rik	371.7	3.05728e-09	1.60662e-07	up	Ensembl	2984	chr11:52276055-52286179+	intronic antisense	NM_009331	Tcf7	chr11:52252604-52282571-
chr4	137728001	137728363	diffreps_peak_126918	0.255416	362	ENSMUST00000123011	Rap1gap	1.25119	0.555371	1	up	Ensembl	703	chr4:137727762-137728936+	exon sense-overlapping	ENSMUST00000097837	Rap1gap	chr4:137707522-137729861+
chr16	14170501	14170700	diffreps_peak_67458	8.19942	199	ENSMUST00000133249	Nde1	347.2	6.31807e-09	2.02595e-07	up	Ensembl	681	chr16:14163304-14170829+	exon sense-overlapping	NM_001285504	Nde1	chr16:14163275-14192923+
chr8	121972761	121973080	diffreps_peak_177717	0.355079	319	ENSMUST00000174536	Gm17709	1.6649	0.44149	0.96091	up	Ensembl	1096	chr8:121972727-121973822-	intronic antisense	ENSMUST00000172511	Banp	chr8:121950605-121991586+
chr2	155973341	155973540	diffreps_peak_103818	0.0015232	199	ENSMUST00000124812	6430550D23Rik	1.06717	0.996499	1	up	Ensembl	2429	chr2:155973279-156007907-	exon sense-overlapping	ENSMUST00000141437	6430550D23Rik	chr2:156003404-156004147-
chr15	98650143	98650360	diffreps_peak_65304	0.0973332	217	ENSMUST00000159423	Ddx23	1.13652	0.799221	1	up	Ensembl	3411	chr15:98648003-98662881-	exon sense-overlapping	ENSMUST00000162384	Ddx23	chr15:98656679-98662858-
chr15	79429661	79429900	diffreps_peak_63228	0.0986484	239	ENSMUST00000135583	Gm16059	1.16759	0.796804	1	up	Ensembl	3778	chr15:79427220-79431629+	natural antisense	ENSMUST00000120859	Csnk1e	chr15:79419166-79442002-
chr2	91177636	91177680	diffreps_peak_99087	0.013296	44	ENSMUST00000135715	Madd	1.17008	0.969849	1	up	Ensembl	1092	chr2:91177637-91183837-	exon sense-overlapping	ENSMUST00000099725	Madd	chr2:91137360-91179321-
chr17	35140230	35140489	diffreps_peak_76772	0.959562	259	ENSMUST00000173351	Bag6	1.29196	0.109758	0.367217	up	Ensembl	831	chr17:35140231-35141393+	exon sense-overlapping	ENSMUST00000173535	Bag6	chr17:35135486-35142595+
chr7	101253529	101253880	diffreps_peak_163970	1.06323	351	ENSMUST00000151693	Fchsd2	1.55385	0.0864516	0.304518	up	Ensembl	607	chr7:101244119-101253921+	exon sense-overlapping	NM_199012	Fchsd2	chr7:101108775-101284405+
chr10	70174961	70175160	diffreps_peak_17697	1.23129	199	ENSMUST00000145990	Ccdc6	2.3202	0.0587096	0.22188	up	Ensembl	706	chr10:70174509-70182206+	exon sense-overlapping	ENSMUST00000156001	Ccdc6	chr10:70175011-70188173+
chr11	108570287	108570500	diffreps_peak_33747	0.422593	213	ENSMUST00000182249	Cep112	1.49741	0.377926	0.877207	up	Ensembl	600	chr11:108531406-108570827+	exon sense-overlapping	ENSMUST00000133670	Cep112	chr11:108498301-108860350+
chr2	173592821	173593014	diffreps_peak_105777	8.00344	193	NR_027957	Ppp4r1l-ps	346.556	9.92112e-09	2.55901e-07	up	RefSeq	4466	chr2:173579320-173659539-	bidirectional	uc008oed.1	Rab22a	chr2:173659845-173702182+
chr16	18347870	18348103	diffreps_peak_67906	0.259342	233	ENSMUST00000125287	Tango2	1.32185	0.550375	1	up	Ensembl	632	chr16:18310888-18348103-	exon sense-overlapping	ENSMUST00000130752	Tango2	chr16:18310896-18343902-
chr8	23140092	23140228	diffreps_peak_169957	1.18703	136	ENSMUST00000130311	Ank1	1.81556	0.0650083	0.240978	up	Ensembl	416	chr8:23140093-23148369+	exon sense-overlapping	ENSMUST00000173248	Ank1	chr8:23058525-23149688+
chr3	94480237	94480341	diffreps_peak_112476	0.311371	104	ENSMUST00000183915	Riiad1	1.45881	0.488236	1	up	Ensembl	389	chr3:94464985-94480341-	natural antisense	NM_172434	Celf3	chr3:94478549-94492198+
chr7	3694773	3695160	diffreps_peak_154077	0.887156	387	ENSMUST00000139396	Tsen34	1.65144	0.129671	0.414237	up	Ensembl	728	chr7:3694774-3695625+	exon sense-overlapping	ENSMUST00000142713	Tsen34	chr7:3693829-3695209+
chr15	81023541	81023720	diffreps_peak_63598	1.03486	179	ENSMUST00000154797	Mkl1	2.80176	0.0922861	0.320651	up	Ensembl	499	chr15:81022489-81023970-	exon sense-overlapping	ENSMUST00000131235	Mkl1	chr15:81012291-81190723-
chr4	98322421	98322700	diffreps_peak_123060	8.40641	279	ENSMUST00000131324	0610025J13Rik	339.6	3.92279e-09	1.60662e-07	up	Ensembl	652	chr4:98321398-98322850+	intergenic
chr5	100363827	100364000	diffreps_peak_136752	1.05081	173	ENSMUST00000182664	Sec31a	1.55374	0.0889587	0.3117	up	Ensembl	600	chr5:100362146-100364270-	exon sense-overlapping	NM_026969	Sec31a	chr5:100361649-100416234-
chr7	141467681	141467771	diffreps_peak_167378	8.44299	90	uc012fxf.1	AK149132	339.1	3.6059e-09	1.60662e-07	up	UCSC_knowngene	1671	chr7:141461483-141467771-	intronic antisense	ENSMUST00000053670	Efcab4a	chr7:141461094-141466613+
chr6	119970746	119970880	diffreps_peak_151772	0.118312	134	ENSMUST00000159151	Wnk1	1.06598	0.761531	1	up	Ensembl	628	chr6:119970747-119973064-	exon sense-overlapping	NM_001185020	Wnk1	chr6:119923969-120038655-
chr7	93179161	93179669	diffreps_peak_163234	1.38681	508	ENSMUST00000133910	Gm15501	1.92754	0.0410381	0.164635	up	Ensembl	687	chr7:93178983-93179669-	intergenic
chr16	20673301	20673500	diffreps_peak_68125	0.814479	199	ENSMUST00000156226	Eif4g1	3.32038	0.153292	0.471302	up	Ensembl	2200	chr16:20673295-20692884+	exon sense-overlapping	ENSMUST00000141034	Eif4g1	chr16:20673814-20678659+
chr5	73338530	73338947	diffreps_peak_135193	6.82797	417	ENSMUST00000133164	Ociad2	1.65361	1.48602e-07	1.64142e-06	up	Ensembl	490	chr5:73332128-73338947-	exon sense-overlapping	NM_026950	Ociad2	chr5:73322199-73338639-
chr5	38226041	38226240	diffreps_peak_133121	0.0432715	199	ENSMUST00000131492	Lyar	1.01522	0.905167	1	up	Ensembl	722	chr5:38224648-38226460+	exon sense-overlapping	ENSMUST00000114106	Lyar	chr5:38220678-38234296+
chr11	102309039	102309540	diffreps_peak_32881	0.867982	501	ENSMUST00000174400	Ubtf	1.31548	0.135524	0.428864	up	Ensembl	668	chr11:102309040-102309908-	exon sense-overlapping	NM_001302954	Ubtf	chr11:102304563-102319096-
chr2	166955101	166955300	diffreps_peak_105223	0.0138581	199	ENSMUST00000142481	Stau1	1.0203	0.968594	1	up	Ensembl	3573	chr2:166948147-166955384-	exon sense-overlapping	ENSMUST00000109236	Stau1	chr2:166948273-166996299-
chr7	27264621	27264980	diffreps_peak_156939	0.633932	359	ENSMUST00000149805	Numbl	1.95847	0.23231	0.640867	up	Ensembl	8511	chr7:27258806-27282144+	exon sense-overlapping	NM_010950	Numbl	chr7:27258761-27282150+
chr10	81317241	81317403	diffreps_peak_19628	0.0192003	162	ENSMUST00000159636	Pip5k1c	1.11948	0.956753	1	up	Ensembl	810	chr10:81316842-81318013+	exon sense-overlapping	NM_001293646	Pip5k1c	chr10:81292963-81319974+
chr6	125153261	125153502	diffreps_peak_152454	1.31074	241	ENSMUST00000141230	Iffo1	1.68208	0.0488948	0.190998	up	Ensembl	3056	chr6:125145266-125161776+	exon sense-overlapping	ENSMUST00000117675	Iffo1	chr6:125145251-125161776+
chr8	45772381	45772708	diffreps_peak_171557	0.304008	327	ENSMUST00000132730	Sorbs2	1.15234	0.496584	1	up	Ensembl	660	chr8:45772354-45775893+	exon sense-overlapping	ENSMUST00000135336	Sorbs2	chr8:45627803-45827873+
chr2	104257501	104257984	diffreps_peak_100140	2.70655	483	ENSMUST00000149165	D430041D05Rik	1.59164	0.0019654	0.0110411	up	Ensembl	4291	chr2:104207666-104257984-	exon sense-overlapping	ENSMUST00000149466	D430041D05Rik	chr2:104255123-104409992-
chr9	21231121	21231320	diffreps_peak_179970	0.0687791	199	uc009okn.1	AK154190	1.03612	0.853534	1	up	UCSC_knowngene	2077	chr9:21225371-21232639+	natural antisense	NM_001110305	Keap1	chr9:21229730-21239332-
chr9	106477670	106477820	diffreps_peak_186448	1.25751	150	ENSMUST00000127400	Rrp9	2.38121	0.0552696	0.211126	up	Ensembl	424	chr9:106477330-106477989+	exon sense-overlapping	ENSMUST00000123464	Rrp9	chr9:106475963-106481873+
chr13	101038801	101039140	diffreps_peak_49567	1.01738	339	ENSMUST00000179479	Hmgb1-ps9	2.15294	0.0960776	0.331201	up	Ensembl	648	chr13:101038599-101039246-	intergenic
chr1	136273767	136274120	diffreps_peak_9439	0.265464	353	ENSMUST00000181385	Gm26781	1.23963	0.542671	1	up	Ensembl	1477	chr1:136259407-136274406+	natural antisense	NM_001101516	Gpr25	chr1:136258914-136260873-
chr1	90939719	90939900	diffreps_peak_6143	8.40065	181	ENSMUST00000136220	Mlph	339.1	3.97509e-09	1.60662e-07	up	Ensembl	863	chr1:90939169-90940239+	exon sense-overlapping	NM_053015	Mlph	chr1:90915100-90951142+
chr2	91260804	91260820	diffreps_peak_99109	0.380837	16	ENSMUST00000126754	Pacsin3	1.68778	0.416067	0.927595	up	Ensembl	761	chr2:91260805-91261669+	exon sense-overlapping	ENSMUST00000156919	Pacsin3	chr2:91256838-91261335+
chr15	79317841	79318012	diffreps_peak_63181	8.25481	171	ENSMUST00000174089	Pla2g6	335.1	5.56141e-09	1.84191e-07	up	Ensembl	708	chr15:79311738-79318012-	exon sense-overlapping	ENSMUST00000047816	Pla2g6	chr15:79286228-79328228-
chr11	70665281	70665364	diffreps_peak_28926	0.249068	83	ENSMUST00000124691	Spag7	1.36145	0.56355	1	up	Ensembl	772	chr11:70664340-70669279-	exon sense-overlapping	ENSMUST00000129434	Spag7	chr11:70664399-70669290-
chr14	54650061	54650268	diffreps_peak_53966	0.266065	207	ENSMUST00000167495	Acin1	1.13077	0.54192	1	up	Ensembl	1352	chr14:54645211-54650268-	exon sense-overlapping	ENSMUST00000147714	Acin1	chr14:54642162-54686616-
chr5	122711141	122711380	diffreps_peak_139717	1.55938	239	uc008zlw.1	AK153427	1.82599	0.0275815	0.117413	up	UCSC_knowngene	3895	chr5:122707569-122711463+	exon sense-overlapping	ENSMUST00000139631	P2rx4	chr5:122707654-122727840+
chr11	99419981	99420129	diffreps_peak_32363	0.117593	148	uc007lit.1	AK158612	1.18068	0.762794	1	up	UCSC_knowngene	3413	chr11:99417243-99423098+	natural antisense	NM_010661	Krt12	chr11:99415664-99422259-
chr6	31664101	31664154	diffreps_peak_145338	8.49045	53	uc009bgi.1	AK085570	331.4	3.23261e-09	1.60662e-07	up	UCSC_knowngene	2034	chr6:31662220-31666118-	intergenic
chr10	59807101	59807360	diffreps_peak_16931	0.294336	259	ENSMUST00000032395	Gm7399	1.74022	0.507767	1	up	Ensembl	858	chr10:59806557-59807414+	intron sense-overlapping	ENSMUST00000179709	Micu1	chr10:59702618-59864130+
chr11	97213221	97213295	diffreps_peak_31669	1.123	74	ENSMUST00000171320	Npepps	1.35224	0.0753347	0.272073	up	Ensembl	423	chr11:97207158-97213295-	exon sense-overlapping	NM_008942	Npepps	chr11:97205856-97280576-
chr4	147379221	147379460	diffreps_peak_128208	0.0521947	239	ENSMUST00000121570	Gm8178	1.13643	0.886758	1	up	Ensembl	646	chr4:147378929-147379574+	intron sense-overlapping	ENSMUST00000154154	Gm13145	chr4:147361311-147391004+
chr7	80398094	80398260	diffreps_peak_162310	1.1476	166	ENSMUST00000153446	Furin	2.49365	0.0711872	0.259775	up	Ensembl	2778	chr7:80396310-80399469-	exon sense-overlapping	ENSMUST00000107362	Furin	chr7:80389194-80405431-
chr4	102759221	102759500	diffreps_peak_123285	0.0459328	279	uc008twn.1	Sgip1	1.07666	0.899637	1	up	UCSC_knowngene	730	chr4:102759222-102869808+	exon sense-overlapping	ENSMUST00000072481	Sgip1	chr4:102760345-102971863+
chr5	81020301	81020600	diffreps_peak_135622	0.0430563	299	ENSMUST00000147226	Lphn3	1.02515	0.905615	1	up	Ensembl	2728	chr5:81020138-81388784+	exon sense-overlapping	ENSMUST00000120292	Lphn3	chr5:81309874-81795347+
chr5	115150821	115151020	diffreps_peak_138375	0.15541	199	ENSMUST00000124678	Mlec	1.24793	0.699181	1	up	Ensembl	505	chr5:115148106-115151046-	exon sense-overlapping	ENSMUST00000112121	Mlec	chr5:115142981-115158179-
chr2	29901281	29901480	diffreps_peak_94740	0.53906	199	ENSMUST00000153216	Odf2	1.53447	0.289028	0.737906	up	Ensembl	828	chr2:29889825-29901493+	exon sense-overlapping	ENSMUST00000113756	Odf2	chr2:29889795-29931745+
chr5	8057537	8057660	diffreps_peak_130150	0.903357	123	ENSMUST00000145119	Sri	1.56687	0.124923	0.402316	up	Ensembl	400	chr5:8056558-8057855+	exon sense-overlapping	ENSMUST00000148633	Sri	chr5:8056527-8069151+
chr3	89177601	89178067	diffreps_peak_112029	1.20208	466	ENSMUST00000156447	Scamp3	1.91743	0.0627942	0.234067	up	Ensembl	802	chr3:89177531-89179452+	exon sense-overlapping	NM_011886	Scamp3	chr3:89177485-89182770+
chr4	41756641	41756995	diffreps_peak_118887	0.445387	354	ENSMUST00000147719	Galt	1.39556	0.358603	0.849147	up	Ensembl	876	chr4:41755961-41757480+	intron sense-overlapping	ENSMUST00000108041	Il11ra1	chr4:41699989-41769474+
chr2	156167701	156167920	diffreps_peak_103924	0.00701606	219	ENSMUST00000130516	Rbm39	1.01031	0.983975	1	up	Ensembl	1456	chr2:156163986-156168148-	exon sense-overlapping	ENSMUST00000029149	Rbm39	chr2:156147249-156180167-
chr17	77674561	77674702	diffreps_peak_80376	0.071999	141	ENSMUST00000168236	Gm17538	1.04516	0.847229	1	up	Ensembl	327	chr17:77674376-77674702-	intergenic
chr2	103796561	103796940	diffreps_peak_100053	0.741032	379	ENSMUST00000146527	Caprin1	1.3511	0.181538	0.535328	up	Ensembl	626	chr2:103796452-103797599-	exon sense-overlapping	ENSMUST00000111147	Caprin1	chr2:103765018-103797104-
chr11	77850661	77850883	diffreps_peak_29801	0.256672	222	ENSMUST00000130956	Myo18a	1.10519	0.553768	1	up	Ensembl	337	chr11:77850656-77853325+	exon sense-overlapping	ENSMUST00000169105	Myo18a	chr11:77777293-77865143+
chr8	120100853	120101072	diffreps_peak_177392	0.0457925	219	ENSMUST00000123186	Zdhhc7	1.01119	0.899927	1	up	Ensembl	246	chr8:120092975-120101072-	intronic antisense	ENSMUST00000127664	Gm20388	chr8:119910841-124345722+
chr3	89168781	89168980	diffreps_peak_112011	0.0545721	199	ENSMUST00000138822	Clk2	1.08285	0.881917	1	up	Ensembl	3168	chr3:89164819-89176919+	exon sense-overlapping	ENSMUST00000121931	Clk2	chr3:89164840-89176921+
chr4	49651361	49651548	diffreps_peak_120237	0.40332	187	ENSMUST00000138490	Rnf20	1.21316	0.395075	0.899592	up	Ensembl	610	chr4:49650968-49652550+	exon sense-overlapping	ENSMUST00000029989	Rnf20	chr4:49632066-49656887+
chr11	77843261	77843460	diffreps_peak_29773	0.0838444	199	ENSMUST00000100443	Myo18a	1.08688	0.824434	1	up	Ensembl	3807	chr11:77840933-77844878+	exon sense-overlapping	NM_011586	Myo18a	chr11:77777235-77865988+
chr8	11831261	11831592	diffreps_peak_168731	5.95935	331	ENSMUST00000151225	Arhgef7	1.76109	1.09812e-06	9.78511e-06	up	Ensembl	1761	chr8:11830238-11832300+	exon sense-overlapping	ENSMUST00000074856	Arhgef7	chr8:11758354-11835219+
chr16	4935161	4935540	diffreps_peak_66441	0.0115812	379	ENSMUST00000181498	Gm16861	1.00455	0.973686	1	up	Ensembl	1647	chr16:4935048-4939585-	intronic antisense	ENSMUST00000023159	Mgrn1	chr16:4886100-4938296+
chr11	5780361	5780600	diffreps_peak_23944	0.0959799	239	NR_015577	2210015D19Rik	1.1613	0.801715	1	up	RefSeq	1840	chr11:5762150-5784710+	natural antisense	ENSMUST00000118076	Urgcp	chr11:5714987-5762376-
chr16	32678801	32679000	diffreps_peak_68893	1.94253	199	ENSMUST00000168506	Tnk2	1.8056	0.0114149	0.0542982	up	Ensembl	769	chr16:32673195-32679064+	exon sense-overlapping	ENSMUST00000115122	Tnk2	chr16:32673154-32679466+
chr17	26206741	26206806	diffreps_peak_75402	8.14202	65	ENSMUST00000127594	Rgs11	305.667	7.21071e-09	2.19709e-07	up	Ensembl	2377	chr17:26203002-26206806+	exon sense-overlapping	NM_001081069	Rgs11	chr17:26202962-26211324+
chrX	84063481	84063700	diffreps_peak_192982	0.00337856	219	ENSMUST00000118590	Gm14769	1.06815	0.992251	1	up	Ensembl	432	chrX:84063333-84063764+	intron sense-overlapping	ENSMUST00000114000	Dmd	chrX:82948903-85206141+
chr7	31041170	31041380	diffreps_peak_157880	0.344325	210	ENSMUST00000161259	Fxyd5	1.81971	0.452559	0.974173	up	Ensembl	338	chr7:31041171-31042140-	exon sense-overlapping	ENSMUST00000009831	Fxyd5	chr7:31032733-31042146-
chr17	35090121	35090288	diffreps_peak_76750	1.21641	167	ENSMUST00000173190	Abhd16a	2.68729	0.0607559	0.227765	up	Ensembl	778	chr17:35089870-35091966+	exon sense-overlapping	ENSMUST00000007251	Abhd16a	chr17:35089291-35102987+
chr2	157561008	157561120	diffreps_peak_104218	0.105704	112	ENSMUST00000134513	Nnat	1.23384	0.783965	1	up	Ensembl	599	chr2:157561009-157561855+	exon sense-overlapping	NM_001291130	Nnat	chr2:157560078-157562525+
chr8	70769347	70769480	diffreps_peak_173380	0.14797	133	ENSMUST00000146707	Pik3r2	1.05944	0.711263	1	up	Ensembl	746	chr8:70768640-70769664-	exon sense-overlapping	NM_008841	Pik3r2	chr8:70768181-70776712-
chr8	84583447	84583745	diffreps_peak_174845	1.1795	298	uc009mmp.1	BC048761	2.25717	0.0661457	0.244414	up	UCSC_knowngene	537	chr8:84583448-84587628-	natural antisense	ENSMUST00000121390	Cacna1a	chr8:84415364-84640246+
chr18	76944042	76944185	diffreps_peak_86216	0.0563412	143	ENSMUST00000142456	Hdhd2	1.10026	0.878332	1	up	Ensembl	1853	chr18:76930126-76971449+	exon sense-overlapping	NM_029826	Hdhd2	chr18:76944115-76972171+
chr9	112155721	112155940	diffreps_peak_187440	0.0436004	219	ENSMUST00000159432	Arpp21	1.0447	0.904481	1	up	Ensembl	5320	chr9:112065236-112234423-	exon sense-overlapping	NM_001177617	Arpp21	chr9:112116220-112217261-
chr11	4784581	4784780	diffreps_peak_23770	0.428974	199	ENSMUST00000141342	Nf2	1.81067	0.372414	0.868712	up	Ensembl	1159	chr11:4767953-4785107-	exon sense-overlapping	NM_001252250	Nf2	chr11:4765845-4849544-
chr11	77842641	77843080	diffreps_peak_29769	1.0085	439	ENSMUST00000100443	Myo18a	1.7317	0.0980617	0.336738	up	Ensembl	3807	chr11:77840933-77844878+	exon sense-overlapping	ENSMUST00000164334	Myo18a	chr11:77801375-77865056+
chr5	145102238	145102372	diffreps_peak_143110	1.04153	134	uc012egt.1	Arpc1a	1.67695	0.0908797	0.31662	up	UCSC_knowngene	1722	chr5:145083869-145108756+	natural antisense	ENSMUST00000151196	Kpna7	chr5:145007278-145084030-
chr4	147136277	147136440	diffreps_peak_128173	8.44271	163	ENSMUST00000181486	Gm26624	278.9	3.60822e-09	1.60662e-07	up	Ensembl	3769	chr4:147136278-147457019+	intron sense-overlapping	ENSMUST00000084149	Gm13139	chr4:147132038-147180579+
chr2	155276888	155277013	diffreps_peak_103622	0.31726	125	ENSMUST00000154596	Map1lc3a	1.09293	0.48166	1	up	Ensembl	826	chr2:155276889-155278068+	exon sense-overlapping	ENSMUST00000029128	Map1lc3a	chr2:155276297-155278073+
chr14	103346341	103346814	diffreps_peak_56966	0.600471	473	ENSMUST00000162537	Mycbp2	1.60394	0.250916	0.675589	up	Ensembl	3495	chr14:103311695-103346814-	exon sense-overlapping	ENSMUST00000159855	Mycbp2	chr14:103113411-103346800-
chr4	138229656	138229757	diffreps_peak_127070	0.30214	101	ENSMUST00000155344	Hp1bp3	1.17823	0.498723	1	up	Ensembl	568	chr4:138229657-138234557+	exon sense-overlapping	ENSMUST00000148681	Hp1bp3	chr4:138228583-138240735+
chr6	120897381	120897568	diffreps_peak_151844	8.17515	187	ENSMUST00000161594	Bid	262.95	6.68109e-09	2.10111e-07	up	Ensembl	563	chr6:120895618-120897568-	exon sense-overlapping	ENSMUST00000004560	Bid	chr6:120892854-120916853-
chr8	120088241	120088268	diffreps_peak_177386	0.0790379	27	ENSMUST00000141886	Zdhhc7	1.14053	0.833609	1	up	Ensembl	670	chr8:120085412-120088268-	exon sense-overlapping	NM_133967	Zdhhc7	chr8:120081095-120101472-
chr16	49759341	49759620	diffreps_peak_70224	0.268552	279	ENSMUST00000127115	Gm15518	1.20155	0.538825	1	up	Ensembl	2108	chr16:49758576-49798870-	natural antisense	ENSMUST00000142682	Ift57	chr16:49699304-49762628+
chr7	4485301	4485500	diffreps_peak_154201	0.182217	199	ENSMUST00000136863	Ppp1r12c	1.35102	0.657329	1	up	Ensembl	871	chr7:4484017-4485708-	exon sense-overlapping	ENSMUST00000124248	Ppp1r12c	chr7:4481520-4501361-
chr16	17089061	17089280	diffreps_peak_67667	0.325996	219	ENSMUST00000146151	Ppil2	1.26524	0.472067	0.996526	up	Ensembl	708	chr16:17088606-17089459-	exon sense-overlapping	NM_144954	Ppil2	chr16:17086556-17111252-
chr1	85276681	85276920	diffreps_peak_5663	0.0844504	239	ENSMUST00000163068	Gm16026	1.23454	0.823284	1	up	Ensembl	2741	chr1:85266698-85277814+	intronic antisense	ENSMUST00000064341	C130026I21Rik	chr1:85246670-85270566-
chr5	116127981	116128420	diffreps_peak_138698	8.59737	439	uc008zex.1	AK049264	261.7	2.52712e-09	1.60662e-07	up	UCSC_knowngene	1599	chr5:116123614-116129110+	intronic antisense	ENSMUST00000050178	Ccdc60	chr5:116124641-116288985-
chr7	28782768	28782980	diffreps_peak_157360	0.292381	212	ENSMUST00000153956	Sirt2	1.259	0.510057	1	up	Ensembl	792	chr7:28777008-28783339+	exon sense-overlapping	NM_001122765	Sirt2	chr7:28766752-28788665+
chr9	50683873	50684080	diffreps_peak_182704	3.10332	207	ENSMUST00000141919	Dixdc1	1.68726	0.000788275	0.00475219	up	Ensembl	6453	chr9:50662756-50699362-	exon sense-overlapping	ENSMUST00000121634	Dixdc1	chr9:50666195-50739517-
chr4	155181275	155181320	diffreps_peak_129456	8.57542	45	uc029vbc.1	AK139813	257.083	2.65816e-09	1.60662e-07	up	UCSC_knowngene	536	chr4:155181276-155181811-	intron sense-overlapping	ENSMUST00000030917	Ski	chr4:155154075-155222592-
chr4	48344581	48344960	diffreps_peak_120150	0.110111	379	ENSMUST00000118949	Gm12435	1.06672	0.776048	1	up	Ensembl	1016	chr4:48344215-48345230-	natural antisense	NM_001281977	Invs	chr4:48279760-48431953+
chr2	136758310	136758400	diffreps_peak_102378	0.0788309	90	ENSMUST00000125486	Snap25	1.09512	0.834006	1	up	Ensembl	4880	chr2:136713454-136762909+	exon sense-overlapping	NM_011428	Snap25	chr2:136713450-136782428+
chr2	32363755	32363979	diffreps_peak_95342	0.101276	224	ENSMUST00000147338	Ciz1	1.05464	0.791998	1	up	Ensembl	993	chr2:32363756-32364987+	exon sense-overlapping	NM_001252536	Ciz1	chr2:32363010-32378313+
chr2	26918841	26919180	diffreps_peak_94354	0.079938	339	ENSMUST00000135506	Surf2	1.10182	0.831882	1	up	Ensembl	3254	chr2:26916669-26920166+	natural antisense	NM_011512	Surf4	chr2:26920041-26933511-
chr4	114920881	114921118	diffreps_peak_124095	8.51234	237	NR_030721	Foxd2os	249.3	3.07368e-09	1.60662e-07	up	RefSeq	2876	chr4:114909289-114921118+	bidirectional	ENSMUST00000068654	Foxd2	chr4:114906280-114908898-
chr16	13887601	13887770	diffreps_peak_67413	4.28005	169	ENSMUST00000137715	Pdxdc1	1.74695	5.24753e-05	0.000371453	up	Ensembl	683	chr16:13887154-13902980-	exon sense-overlapping	NM_053181	Pdxdc1	chr16:13835700-13903145-
chr10	122095961	122096136	diffreps_peak_22343	0.291124	175	ENSMUST00000141057	Tmem5	1.33592	0.511536	1	up	Ensembl	644	chr10:122089022-122096136-	exon sense-overlapping	ENSMUST00000140299	Tmem5	chr10:122078114-122097371-
chr3	84190761	84191320	diffreps_peak_111536	1.1653	559	ENSMUST00000128574	Trim2	1.34269	0.0683433	0.251193	up	Ensembl	4734	chr3:84163707-84220845-	exon sense-overlapping	NM_001271726	Trim2	chr3:84160439-84304775-
chr11	95029381	95029424	diffreps_peak_31486	11.1242	43	ENSMUST00000129262	Pdk2	241.8	7.51293e-12	3.21591e-09	up	Ensembl	572	chr11:95028728-95029424-	exon sense-overlapping	NM_133667	Pdk2	chr11:95026258-95041371-
chr3	89238665	89238703	diffreps_peak_112068	8.57181	38	NR_121683	Trim46	235	2.68035e-09	1.60662e-07	up	RefSeq	3300	chr3:89234177-89245013-	exon sense-overlapping	ENSMUST00000090924	Trim46	chr3:89234177-89245199-
chr2	160731299	160731344	diffreps_peak_104427	0.140679	45	ENSMUST00000151590	Plcg1	1.0806	0.723304	1	up	Ensembl	4388	chr2:160731300-160762502+	exon sense-overlapping	ENSMUST00000103115	Plcg1	chr2:160731310-160775760+
chr9	67033861	67033993	diffreps_peak_183979	0	132	ENSMUST00000131279	Tpm1	1.0078	1	1	up	Ensembl	649	chr9:67033778-67049191-	exon sense-overlapping	NM_001164253	Tpm1	chr9:67022593-67043871-
chrX	94796121	94796560	diffreps_peak_193456	0.104285	439	ENSMUST00000180381	Gm26617	1.16014	0.78653	1	up	Ensembl	4429	chrX:94793103-94798237+	intergenic
chr17	6358643	6358788	diffreps_peak_73530	8.03611	145	uc008agn.1	AK207024	226.468	9.20211e-09	2.43716e-07	up	UCSC_knowngene	397	chr17:6351652-6361844-	intergenic
chr11	77860286	77860331	diffreps_peak_29810	1.33691	45	ENSMUST00000133740	Myo18a	1.64872	0.0460351	0.181523	up	Ensembl	550	chr11:77860287-77865195+	exon sense-overlapping	ENSMUST00000168348	Myo18a	chr11:77777293-77865142+
chr14	24148301	24148560	diffreps_peak_51905	0.0228894	259	ENSMUST00000164638	Dlg5	1.01559	0.94866	1	up	Ensembl	748	chr14:24146281-24148764-	exon sense-overlapping	ENSMUST00000073687	Dlg5	chr14:24133953-24245920-
chr4	127987861	127988080	diffreps_peak_125490	0.426451	219	ENSMUST00000129619	Csmd2	1.23094	0.374584	0.87197	up	Ensembl	3034	chr4:127987857-128339657+	exon sense-overlapping	NM_001281955	Csmd2	chr4:127988044-128567656+
chr2	121457241	121457440	diffreps_peak_101232	0.0363724	199	ENSMUST00000125849	Hypk	1.01738	0.919661	1	up	Ensembl	1349	chr2:121456693-121458436+	exon sense-overlapping	ENSMUST00000126764	Hypk	chr2:121456963-121458672+
chr7	25120801	25120897	diffreps_peak_156615	0.36127	96	ENSMUST00000175754	Pou2f2	1.71235	0.435241	0.952734	up	Ensembl	443	chr7:25120618-25159922-	exon sense-overlapping	ENSMUST00000098679	Pou2f2	chr7:25092472-25132488-
chr14	26020061	26020440	diffreps_peak_52128	8.01313	379	uc007ssb.1	AK086039	217.357	9.70229e-09	2.52263e-07	up	UCSC_knowngene	3349	chr14:26016885-26022071+	intergenic
chr8	93808735	93808820	diffreps_peak_175579	8.66006	85	ENSMUST00000181864	Gm26843	197.7	2.18746e-09	1.60662e-07	up	Ensembl	3246	chr8:93750147-93810292-	natural antisense	ENSMUST00000137202	Gnao1	chr8:93809966-93950403+
chr6	106345681	106345739	diffreps_peak_150349	0.0801557	58	ENSMUST00000130040	Cntn4	1.04372	0.831466	1	up	Ensembl	1266	chr6:106119055-106345739+	exon sense-overlapping	ENSMUST00000079416	Cntn4	chr6:106119006-106673487+
chr16	84828561	84828800	diffreps_peak_72173	1.60474	239	ENSMUST00000144799	Atp5j	1.22423	0.0248465	0.107385	up	Ensembl	514	chr16:84827871-84828813-	exon sense-overlapping	ENSMUST00000114191	Atp5j	chr16:84827871-84835503-
chr2	84774739	84774940	diffreps_peak_98712	8.18411	201	ENSMUST00000131456	Serping1	197.083	6.54471e-09	2.0764e-07	up	Ensembl	903	chr2:84773131-84775128-	exon sense-overlapping	ENSMUST00000111641	Serping1	chr2:84765506-84775444-
chr1	133292401	133292640	diffreps_peak_8961	0.0647752	239	uc007cpy.1	AK020645	1.18986	0.86144	1	up	UCSC_knowngene	953	chr1:133291989-133292941+	exon sense-overlapping	ENSMUST00000038295	Plekha6	chr1:133246097-133303435+
chr11	94298949	94299031	diffreps_peak_31342	1.09589	82	ENSMUST00000135311	Luc7l3	1.76676	0.0801886	0.286472	up	Ensembl	397	chr11:94297015-94299031-	exon sense-overlapping	NM_026313	Luc7l3	chr11:94291139-94321911-
chr18	5592381	5592580	diffreps_peak_81626	0.225198	199	ENSMUST00000161096	Gm10125	1.49522	0.595391	1	up	Ensembl	3491	chr18:5565652-5593505-	intronic antisense	ENSMUST00000159390	Zeb1	chr18:5591891-5766533+
chr5	107504981	107505130	diffreps_peak_137319	0.717316	149	ENSMUST00000133800	A830010M20Rik	1.31128	0.191727	0.557362	up	Ensembl	711	chr5:107503943-107507222+	exon sense-overlapping	NM_001007574	A830010M20Rik	chr5:107497745-107512556+
chr13	55481841	55482040	diffreps_peak_47003	0.0751602	199	ENSMUST00000175813	Dbn1	1.05287	0.841085	1	up	Ensembl	732	chr13:55481400-55482257-	exon sense-overlapping	NM_019813	Dbn1	chr13:55473428-55488076-
chr4	141348321	141348760	diffreps_peak_127577	8.50021	439	ENSMUST00000124848	Gm13074	181.4	3.16072e-09	1.60662e-07	up	Ensembl	2735	chr4:141347814-141350853+	intergenic
chr14	25649381	25649574	diffreps_peak_52048	1.14315	193	ENSMUST00000159766	Zmiz1	1.53548	0.0719202	0.261896	up	Ensembl	4314	chr14:25459292-25649574+	exon sense-overlapping	ENSMUST00000162645	Zmiz1	chr14:25459224-25666743+
chr10	80549064	80549120	diffreps_peak_19148	0.173807	56	ENSMUST00000183073	Rexo1	1.38578	0.670182	1	up	Ensembl	889	chr10:80545997-80549462-	exon sense-overlapping	ENSMUST00000182260	Rexo1	chr10:80541664-80547921-
chr13	6957561	6957820	diffreps_peak_43753	8.48537	259	uc007pke.2	AK224954	180.7	3.27058e-09	1.60662e-07	up	UCSC_knowngene	1330	chr13:6956642-6957971-	intergenic
chr2	91935201	91935600	diffreps_peak_99209	0.388731	399	ENSMUST00000130023	Dgkz	1.15552	0.408573	0.917704	up	Ensembl	994	chr2:91933781-91935600-	exon sense-overlapping	NM_001166597	Dgkz	chr2:91932827-91950348-
chr17	35908425	35908484	diffreps_peak_76999	0.211456	59	uc008ciz.1	AK034502	1.43035	0.614532	1	up	UCSC_knowngene	2945	chr17:35896946-35912215+	natural antisense	ENSMUST00000146451	2310061I04Rik	chr17:35892687-35897111-
chr15	79424601	79424800	diffreps_peak_63221	0.173963	199	ENSMUST00000156513	Csnk1e	1.13987	0.669942	1	up	Ensembl	883	chr15:79424166-79425559-	exon sense-overlapping	ENSMUST00000120859	Csnk1e	chr15:79419166-79442002-
chr4	126273141	126273360	diffreps_peak_125335	9.06646	219	ENSMUST00000126786	Trappc3	179.944	8.58096e-10	1.4711e-07	up	Ensembl	737	chr4:126262400-126273475+	exon sense-overlapping	NM_013718	Trappc3	chr4:126262405-126275883+
chr17	28202101	28202320	diffreps_peak_75808	0.12765	219	ENSMUST00000145313	Zfp523	1.11289	0.745333	1	up	Ensembl	3350	chr17:28177207-28205886+	exon sense-overlapping	ENSMUST00000155030	Zfp523	chr17:28202291-28205162+
chr12	107205075	107205180	diffreps_peak_42159	8.41883	105	ENSMUST00000117317	Gm5187	177.5	3.81217e-09	1.60662e-07	up	Ensembl	991	chr12:107205076-107206066-	intergenic
chr7	45019469	45019560	diffreps_peak_159187	7.5783	91	ENSMUST00000142115	Rras	175.325	2.64058e-08	4.50896e-07	up	Ensembl	317	chr7:45019470-45020405+	exon sense-overlapping	ENSMUST00000044111	Rras	chr7:45017978-45021646+
chr14	52268641	52268820	diffreps_peak_53829	0.755168	179	ENSMUST00000174585	Rab2b	1.25505	0.175724	0.522414	up	Ensembl	3576	chr14:52261769-52269106-	exon sense-overlapping	NM_172601	Rab2b	chr14:52261759-52279395-
chr2	51960381	51960640	diffreps_peak_96663	1.03932	259	ENSMUST00000123521	Nmi	2.62959	0.0913436	0.317948	up	Ensembl	487	chr2:51960236-51972970-	exon sense-overlapping	ENSMUST00000112705	Nmi	chr2:51948505-51973016-
chr18	65991281	65991500	diffreps_peak_85539	0.480835	219	ENSMUST00000144793	Lman1	1.48122	0.330495	0.805592	up	Ensembl	2139	chr18:65991151-65993660-	exon sense-overlapping	ENSMUST00000120461	Lman1	chr18:65983207-66002621-
chr2	164834601	164834800	diffreps_peak_104785	0.304053	199	ENSMUST00000144580	Ctsa	1.30225	0.496532	1	up	Ensembl	766	chr2:164834473-164835469+	exon sense-overlapping	ENSMUST00000103092	Ctsa	chr2:164832901-164841032+
chr1	180094380	180094740	diffreps_peak_12175	0.3943	360	ENSMUST00000139002	Cdc42bpa	1.17412	0.403367	0.910819	up	Ensembl	732	chr1:180084483-180094846+	exon sense-overlapping	ENSMUST00000097450	Cdc42bpa	chr1:179961110-180162166+
chr11	85801788	85802013	diffreps_peak_30692	0.898947	225	NR_077059	2610027K06Rik	1.43692	0.126198	0.405622	up	RefSeq	2326	chr11:85791660-85832388-	natural antisense	NM_001166642	Bcas3	chr11:85353164-85826058+
chr7	30957408	30957460	diffreps_peak_157865	0.0454793	52	uc009ghi.1	AK154275	1.09698	0.900577	1	up	UCSC_knowngene	3660	chr7:30957409-30961619+	natural antisense	NM_017405	Lsr	chr7:30957770-30973469-
chr11	33710914	33710980	diffreps_peak_25513	0.0273001	66	ENSMUST00000125068	Gm12120	1.00473	0.939074	1	up	Ensembl	592	chr11:33705550-33711435+	intronic antisense	NM_001190886	Kcnip1	chr11:33629341-33993193-
chr2	181382581	181383240	diffreps_peak_106729	0.507274	659	ENSMUST00000131284	Zgpat	1.38121	0.310976	0.774527	up	Ensembl	4892	chr2:181365452-181383626+	exon sense-overlapping	NM_001048148	Zgpat	chr2:181365423-181380793+
chr3	158017809	158018114	diffreps_peak_116356	0.141681	305	ENSMUST00000126377	Srsf11	1.04803	0.721638	1	up	Ensembl	437	chr3:158016322-158018114-	exon sense-overlapping	ENSMUST00000152274	Srsf11	chr3:158010644-158023422-
chr16	10682421	10682620	diffreps_peak_67168	0.834818	199	uc029swb.1	AK134234	3.3567	0.146279	0.454795	up	UCSC_knowngene	2018	chr16:10669248-10683539-	intronic antisense	ENSMUST00000066345	Clec16a	chr16:10545339-10744878+
chr14	101920221	101920440	diffreps_peak_56852	0.47124	219	ENSMUST00000159154	Lmo7	1.3569	0.337878	0.816527	up	Ensembl	3330	chr14:101919077-101930760+	exon sense-overlapping	NM_201529	Lmo7	chr14:101729928-101934693+
chr5	30959181	30959412	diffreps_peak_132163	0.337605	231	ENSMUST00000123211	Preb	1.57683	0.459615	0.982149	up	Ensembl	756	chr5:30958939-30960252-	exon sense-overlapping	ENSMUST00000148214	Preb	chr5:30950853-30959234-
chr2	166952121	166952360	diffreps_peak_105213	0.216436	239	ENSMUST00000142481	Stau1	1.11502	0.607524	1	up	Ensembl	3573	chr2:166948147-166955384-	exon sense-overlapping	NM_001109906	Stau1	chr2:166947549-166996299-
chr11	101207921	101208285	diffreps_peak_32662	7.53172	364	ENSMUST00000154211	Ezh1	164.989	2.93957e-08	4.85906e-07	up	Ensembl	658	chr11:101207654-101209405-	exon sense-overlapping	ENSMUST00000107285	Ezh1	chr11:101191116-101226450-
chr19	6445459	6445480	diffreps_peak_88070	1.01905	21	ENSMUST00000157014	Nrxn2	1.47993	0.095708	0.330099	up	Ensembl	739	chr19:6445460-6473353+	exon sense-overlapping	ENSMUST00000077182	Nrxn2	chr19:6418738-6533216+
chr2	30240566	30240677	diffreps_peak_94868	3.86675	111	ENSMUST00000139454	LRRC8A	1.93415	0.000135909	0.000914761	up	Ensembl	4238	chr2:30240567-30282148+	exon sense-overlapping	ENSMUST00000113645	Phyhd1	chr2:30266721-30282148+
chr5	66997091	66997246	diffreps_peak_134765	0.158412	155	ENSMUST00000137394	Limch1	1.08501	0.694365	1	up	Ensembl	680	chr5:66997092-66999346+	exon sense-overlapping	NM_001001980	Limch1	chr5:66745840-67057159+
chrX	151414081	151414384	diffreps_peak_196284	0.966083	303	ENSMUST00000121488	Gm6451	2.31011	0.108123	0.364016	up	Ensembl	717	chrX:151413668-151414384-	intronic antisense	NM_198105	Fam120c	chrX:151344223-151474134+
chr1	91302768	91302900	diffreps_peak_6216	8.10693	132	ENSMUST00000123651	Scly	163.667	7.8176e-09	2.28107e-07	up	Ensembl	945	chr1:91298360-91303511+	exon sense-overlapping	ENSMUST00000147523	Scly	chr1:91298407-91308815+
chr17	70805878	70806059	diffreps_peak_80106	0.430005	181	uc008dln.1	AK082862	1.38662	0.371531	0.867348	up	UCSC_knowngene	2387	chr17:70765839-70806059-	natural antisense	NM_027712	Dlgap1	chr17:70424792-70816729+
chr17	35146376	35146903	diffreps_peak_76796	0.129145	527	ENSMUST00000172882	Bag6	1.09743	0.74277	1	up	Ensembl	683	chr17:35146377-35147296+	exon sense-overlapping	ENSMUST00000172993	Bag6	chr17:35145888-35147319+
chr7	126959046	126959380	diffreps_peak_166213	4.35836	334	ENSMUST00000125669	Sez6l2	1.37161	4.3817e-05	0.000313141	up	Ensembl	641	chr7:126953867-126959451+	exon sense-overlapping	ENSMUST00000106333	Sez6l2	chr7:126950729-126970596+
chr11	96964821	96965060	diffreps_peak_31620	8.08582	239	NR_003293	D030028A08Rik	160.5	8.20689e-09	2.31551e-07	up	RefSeq	2820	chr11:96944146-96965060+	intronic antisense	ENSMUST00000107624	Sp2	chr11:96953341-96977711-
chr18	61735597	61735880	diffreps_peak_85257	0.222385	283	ENSMUST00000184530	RP24-390G17.1	1.10792	0.599259	1	up	Ensembl	423	chr18:61734357-61735909+	natural antisense	NM_178928	Afap1l1	chr18:61730262-61786662-
chr12	76583759	76583980	diffreps_peak_39988	0.677755	221	ENSMUST00000170532	Sptb	1.269	0.210012	0.595903	up	Ensembl	532	chr12:76583231-76584086-	exon sense-overlapping	ENSMUST00000021458	Sptb	chr12:76580488-76710547-
chr11	77843121	77843420	diffreps_peak_29771	0.0829665	299	ENSMUST00000100443	Myo18a	1.13494	0.826102	1	up	Ensembl	3807	chr11:77840933-77844878+	exon sense-overlapping	NM_001291213	Myo18a	chr11:77777235-77865988+
chr7	4834321	4834515	diffreps_peak_154329	0.0297945	194	ENSMUST00000132806	Shisa7	1.03507	0.933696	1	up	Ensembl	619	chr7:4831391-4834515-	exon sense-overlapping	ENSMUST00000119433	Shisa7	chr7:4828027-4836723-
chr2	84886273	84886476	diffreps_peak_98734	0.712673	203	ENSMUST00000151759	Rtn4rl2	1.69388	0.193788	0.561838	up	Ensembl	550	chr2:84880523-84886476-	exon sense-overlapping	ENSMUST00000054514	Rtn4rl2	chr2:84871946-84886692-
chr11	60931781	60931867	diffreps_peak_27684	0.0803159	86	NR_027800	Map2k3os	1.13979	0.831159	1	up	RefSeq	1267	chr11:60920941-60931867-	bidirectional	ENSMUST00000019076	Map2k3	chr11:60932033-60952811+
chr16	43463101	43463175	diffreps_peak_69844	8.37558	74	ENSMUST00000126354	Zbtb20	158.694	4.2113e-09	1.60662e-07	up	Ensembl	563	chr16:42875881-43463175+	exon sense-overlapping	ENSMUST00000146708	Zbtb20	chr16:43235880-43609573+
chr2	104207841	104208209	diffreps_peak_100100	1.8533	368	ENSMUST00000149165	D430041D05Rik	1.67615	0.0140184	0.0650027	up	Ensembl	4291	chr2:104207666-104257984-	exon sense-overlapping	ENSMUST00000141159	D430041D05Rik	chr2:104143073-104257400-
chrX	152623061	152623320	diffreps_peak_196469	0.130884	259	ENSMUST00000152746	Shroom2	1.04705	0.739802	1	up	Ensembl	4251	chrX:152612528-152673240-	exon sense-overlapping	NM_001290687	Shroom2	chrX:152609509-152644149-
chr14	26159661	26160080	diffreps_peak_52135	7.85248	419	uc007ssi.1	AK086039	156.626	1.4045e-08	3.0286e-07	up	UCSC_knowngene	3349	chr14:26156499-26161685+	intron sense-overlapping	ENSMUST00000163305	Cphx3	chr14:26082297-26235735+
chr2	107600201	107600500	diffreps_peak_100298	8.36922	299	ENSMUST00000090043	Gm9864	146.4	4.27351e-09	1.60662e-07	up	Ensembl	1656	chr2:107595630-107600539-	intergenic
chr3	96186921	96187153	diffreps_peak_112737	0	232	ENSMUST00000133665	Sv2a	1.0185	1	1	up	Ensembl	740	chr3:96186671-96188429+	exon sense-overlapping	NM_022030	Sv2a	chr3:96181227-96195180+
chr6	54487905	54488030	diffreps_peak_146931	5.27964	125	ENSMUST00000131043	Wipf3	1.47979	5.25248e-06	4.209e-05	up	Ensembl	2660	chr6:54487906-54491542+	exon sense-overlapping	ENSMUST00000172046	Wipf3	chr6:54452883-54503768+
chr5	135731549	135731660	diffreps_peak_141650	0.0665578	111	ENSMUST00000149684	Por	1.05414	0.857911	1	up	Ensembl	673	chr5:135731550-135733915+	exon sense-overlapping	ENSMUST00000122113	Por	chr5:135689158-135735326+
chr19	61122455	61122520	diffreps_peak_92063	0.437331	65	uc008ici.1	AK045970	1.5875	0.365316	0.858671	up	UCSC_knowngene	4842	chr19:61122456-61140807-	intergenic
chr11	102196181	102196322	diffreps_peak_32801	0.130221	141	ENSMUST00000136304	Hdac5	1.19816	0.740932	1	up	Ensembl	754	chr11:102195747-102197185-	exon sense-overlapping	ENSMUST00000107150	Hdac5	chr11:102195751-102230136-
chr4	155070501	155070760	diffreps_peak_129427	10.2118	259	ENSMUST00000125432	Pex10	146.182	6.14063e-11	1.87342e-08	up	Ensembl	2790	chr4:155067057-155072181+	exon sense-overlapping	NM_001042407	Pex10	chr4:155067030-155072406+
chr10	80785781	80786280	diffreps_peak_19291	0.830327	499	ENSMUST00000163526	Dot1l	1.48422	0.147799	0.458022	up	Ensembl	790	chr10:80785164-80786421+	exon sense-overlapping	ENSMUST00000105336	Dot1l	chr10:80755206-80795461+
chr5	123740841	123741080	diffreps_peak_140008	0.379535	239	ENSMUST00000182968	Rsrc2	1.16755	0.417316	0.929364	up	Ensembl	3074	chr5:123734889-123741748-	exon sense-overlapping	ENSMUST00000182955	Rsrc2	chr5:123728967-123749371-
chr17	33931481	33931634	diffreps_peak_76488	8.11087	153	ENSMUST00000173258	Rgl2	144.833	7.74691e-09	2.27181e-07	up	Ensembl	788	chr17:33931211-33932503+	exon sense-overlapping	ENSMUST00000047503	Rgl2	chr17:33929582-33937687+
chr9	80286321	80286508	diffreps_peak_184968	0.131774	187	ENSMUST00000156199	Myo6	1.02347	0.738288	1	up	Ensembl	635	chr9:80285414-80286508+	exon sense-overlapping	ENSMUST00000184480	Myo6	chr9:80165227-80308097+
chr2	154887681	154887880	diffreps_peak_103571	0.0822238	199	ENSMUST00000135524	Eif2s2	1.09131	0.827516	1	up	Ensembl	4102	chr2:154884378-154892808-	exon sense-overlapping	NM_026030	Eif2s2	chr2:154871410-154892906-
chr15	64123671	64123806	diffreps_peak_61582	0.417028	135	ENSMUST00000177475	Asap1	1.14389	0.3828	0.883974	up	Ensembl	339	chr15:64120091-64123806-	exon sense-overlapping	ENSMUST00000176384	Asap1	chr15:64088619-64382737-
chr11	32652747	32652900	diffreps_peak_25460	7.71599	153	uc007ijv.2	Fbxw11	144.242	1.92312e-08	3.68159e-07	up	UCSC_knowngene	827	chr11:32642555-32711997+	exon sense-overlapping	NM_134015	Fbxw11	chr11:32642555-32746814+
chr7	144445802	144445905	diffreps_peak_167756	0.659638	103	ENSMUST00000126018	Cttn	2.08736	0.218959	0.61441	up	Ensembl	336	chr7:144440015-144445905-	exon sense-overlapping	ENSMUST00000103079	Cttn	chr7:144435735-144471009-
chr11	102147441	102147760	diffreps_peak_32791	8.44694	319	ENSMUST00000129799	Nags	141.8	3.57319e-09	1.60662e-07	up	Ensembl	2714	chr11:102145513-102149477+	exon sense-overlapping	ENSMUST00000055409	Nags	chr11:102145549-102149477+
chr4	21859161	21859540	diffreps_peak_117677	0.19795	379	ENSMUST00000152666	Sfrs18	1.08426	0.633942	1	up	Ensembl	3470	chr4:21848058-21860468+	exon sense-overlapping	NM_025669	Pnisr	chr4:21847583-21876475+
chr1	66322361	66322740	diffreps_peak_4193	0.60366	379	ENSMUST00000147494	Gm10558	1.15874	0.249081	0.672267	up	Ensembl	1661	chr1:66322276-66328796-	natural antisense	ENSMUST00000114017	Map2	chr1:66175313-66442028+
chr2	30029721	30030196	diffreps_peak_94815	0.48536	475	ENSMUST00000152453	Sptan1	1.06733	0.327069	0.799939	up	Ensembl	683	chr2:30027597-30030370+	exon sense-overlapping	ENSMUST00000095083	Sptan1	chr2:29965682-30031451+
chr4	11321943	11322300	diffreps_peak_116986	0.164282	357	ENSMUST00000181105	Gm26663	1.22156	0.685043	1	up	Ensembl	1882	chr4:11321944-11342953+	natural antisense	ENSMUST00000084892	Dpy19l4	chr4:11261315-11322137-
chr11	116354121	116354320	diffreps_peak_34529	0.0483822	199	ENSMUST00000141229	Rnf157	1.01541	0.894577	1	up	Ensembl	2265	chr11:116352652-116359505-	exon sense-overlapping	ENSMUST00000106398	Rnf157	chr11:116336353-116413004-
chr10	80237481	80237820	diffreps_peak_18989	8.59636	339	ENSMUST00000138801	Mum1	137.581	2.53305e-09	1.60662e-07	up	Ensembl	7927	chr10:80234194-80243903+	exon sense-overlapping	NM_023431	Mum1	chr10:80226598-80245144+
chr4	57300201	57300310	diffreps_peak_120688	7.89355	109	ENSMUST00000129102	Gm12536	134	1.27775e-08	2.88816e-07	up	Ensembl	358	chr4:57300096-57307305+	intronic antisense	ENSMUST00000075637	Ptpn3	chr4:57190841-57301837-
chr2	170387121	170387207	diffreps_peak_105662	0.163311	86	ENSMUST00000147577	Bcas1	1.1333	0.686576	1	up	Ensembl	444	chr2:170386971-170388003-	exon sense-overlapping	ENSMUST00000154650	Bcas1	chr2:170346991-170406509-
chr11	93886206	93886360	diffreps_peak_31274	0.531682	154	ENSMUST00000127539	Mbtd1	2.23653	0.29398	0.746024	up	Ensembl	598	chr11:93886207-93908941+	exon sense-overlapping	ENSMUST00000107850	Mbtd1	chr11:93885866-93921475+
chr4	141072461	141072637	diffreps_peak_127561	0.990188	176	ENSMUST00000144813	Necap2	2.0831	0.102285	0.34806	up	Ensembl	742	chr4:141072329-141078357-	exon sense-overlapping	ENSMUST00000030760	Necap2	chr4:141066512-141078357-
chr10	39645781	39645808	diffreps_peak_15666	0.152575	27	ENSMUST00000145971	E130307A14Rik	1.15632	0.703761	1	up	Ensembl	830	chr10:39639567-39731982-	natural antisense	NM_134000	Traf3ip2	chr10:39612934-39655307+
chr2	155979976	155980100	diffreps_peak_103848	0.612933	124	ENSMUST00000124812	6430550D23Rik	1.62966	0.243819	0.662555	up	Ensembl	2429	chr2:155973279-156007907-	natural antisense	ENSMUST00000094421	Cep250	chr2:155956558-155998900+
chr7	45353441	45353640	diffreps_peak_159330	0.0597191	199	uc009guu.2	Ppfia3	1.0657	0.871527	1	up	UCSC_knowngene	4893	chr7:45339273-45367019-	exon sense-overlapping	ENSMUST00000137578	Ppfia3	chr7:45339275-45360113-
chr7	45830594	45830880	diffreps_peak_159591	8.1418	286	ENSMUST00000156070	Grwd1	130.568	7.21436e-09	2.19723e-07	up	Ensembl	849	chr7:45826063-45830881-	exon sense-overlapping	ENSMUST00000107723	Grwd1	chr7:45825227-45830789-
chr4	133695741	133696156	diffreps_peak_126471	0.948475	415	ENSMUST00000138473	Arid1a	1.19918	0.112596	0.374208	up	Ensembl	3964	chr4:133689487-133753982-	exon sense-overlapping	NM_001080819	Arid1a	chr4:133679008-133753611-
chr11	120701123	120701283	diffreps_peak_35558	0.26157	160	ENSMUST00000168097	Aspscr1	1.4305	0.547558	1	up	Ensembl	624	chr11:120673063-120701564+	exon sense-overlapping	ENSMUST00000153346	Aspscr1	chr11:120673404-120686701+
chr4	116604701	116604814	diffreps_peak_124219	0.398562	113	ENSMUST00000130363	Nasp	1.38808	0.399427	0.905472	up	Ensembl	905	chr4:116602792-116604925-	exon sense-overlapping	NM_001081475	Nasp	chr4:116601052-116627497-
chr1	85595941	85596109	diffreps_peak_5735	8.4243	168	ENSMUST00000151690	Sp110	130.5	3.76442e-09	1.60662e-07	up	Ensembl	582	chr1:85595831-85598779-	exon sense-overlapping	ENSMUST00000093508	Sp110	chr1:85576899-85598817-
chr5	24427522	24427640	diffreps_peak_131400	0.593506	118	ENSMUST00000139081	Slc4a2	1.98913	0.254973	0.683103	up	Ensembl	332	chr5:24425285-24427703+	exon sense-overlapping	ENSMUST00000153274	Slc4a2	chr5:24423837-24427612+
chr12	66483421	66483700	diffreps_peak_39245	8.05593	279	ENSMUST00000178724	Mdga2	126.8	8.7917e-09	2.37504e-07	up	Ensembl	5217	chr12:66481622-66486838-	exon sense-overlapping	ENSMUST00000179345	MDGA2	chr12:66471515-67221249-
chr3	30961581	30961883	diffreps_peak_108702	1.17791	302	ENSMUST00000150939	Phc3	3.1939	0.0663884	0.245163	up	Ensembl	944	chr3:30961103-30965935-	exon sense-overlapping	NM_001165956	Phc3	chr3:30899295-30969415-
chr7	30563325	30563440	diffreps_peak_157757	0.258525	115	ENSMUST00000168222	U2af1l4	1.37825	0.55141	1	up	Ensembl	715	chr7:30563326-30564607+	exon sense-overlapping	ENSMUST00000163464	U2af1l4	chr7:30563356-30565179+
chr17	24906641	24906798	diffreps_peak_75023	2.03662	157	ENSMUST00000152486	Mapk8ip3	1.624	0.00919143	0.0447816	up	Ensembl	771	chr17:24905180-24906798-	exon sense-overlapping	ENSMUST00000117509	Mapk8ip3	chr17:24897533-24936912-
chr7	141432421	141432620	diffreps_peak_167351	0.663753	199	ENSMUST00000140602	Slc25a22	1.81383	0.216894	0.610185	up	Ensembl	3264	chr7:141429749-141437827-	exon sense-overlapping	ENSMUST00000136354	Slc25a22	chr7:141431626-141434402-
chr5	38225901	38226180	diffreps_peak_133119	0.0975523	279	ENSMUST00000131492	Lyar	1.10418	0.798818	1	up	Ensembl	722	chr5:38224648-38226460+	exon sense-overlapping	ENSMUST00000123207	Lyar	chr5:38220520-38227915+
chr2	45108441	45108680	diffreps_peak_96324	2.05468	239	ENSMUST00000123037	Zeb2	1.95468	0.00881696	0.043127	up	Ensembl	3852	chr2:45106485-45113001-	exon sense-overlapping	NM_015753	Zeb2	chr2:44983512-45113279-
chr11	79033021	79033400	diffreps_peak_30075	0.128503	379	NR_045873	Gm11201	1.03189	0.743869	1	up	RefSeq	3347	chr11:79023597-79035005+	natural antisense	ENSMUST00000108264	Ksr1	chr11:79026707-79146407-
chr2	155976376	155976480	diffreps_peak_103833	0.1327	104	ENSMUST00000124812	6430550D23Rik	1.20722	0.736716	1	up	Ensembl	2429	chr2:155973279-156007907-	exon sense-overlapping	ENSMUST00000141437	6430550D23Rik	chr2:156003404-156004147-
chr17	70765838	70766120	diffreps_peak_80085	0.541954	282	uc008dln.1	AK082862	1.29903	0.287108	0.735714	up	UCSC_knowngene	2387	chr17:70765839-70806059-	natural antisense	ENSMUST00000135938	Dlgap1	chr17:70516022-70818234+
chr2	26899093	26899300	diffreps_peak_94338	0.014951	207	ENSMUST00000127691	Surf6	1.14118	0.96616	1	up	Ensembl	372	chr2:26899094-26899768-	exon sense-overlapping	ENSMUST00000114043	Surf6	chr2:26890772-26902850-
chr10	127481401	127481620	diffreps_peak_22879	0.647146	219	ENSMUST00000164469	R3hdm2	1.3853	0.225348	0.627275	up	Ensembl	763	chr10:127481314-127484544+	exon sense-overlapping	ENSMUST00000105250	R3hdm2	chr10:127390311-127499383+
chr10	81587481	81587780	diffreps_peak_19853	0.161849	299	ENSMUST00000139135	Tle2	1.57931	0.688892	1	up	Ensembl	950	chr10:81587426-81590423+	exon sense-overlapping	ENSMUST00000124854	Tle2	chr10:81587969-81590473+
chr11	119857241	119857440	diffreps_peak_35241	7.75965	199	ENSMUST00000126802	Rptor	124.913	1.73919e-08	3.45154e-07	up	Ensembl	3247	chr11:119811246-119867389+	exon sense-overlapping	ENSMUST00000124401	Rptor	chr11:119822947-119856298+
chr7	7948381	7948640	diffreps_peak_154740	8.10978	259	ENSMUST00000163406	Gm3978	123.889	7.76637e-09	2.2743e-07	up	Ensembl	2512	chr7:7948362-7964378-	intergenic
chr11	5070801	5070891	diffreps_peak_23870	0.0625167	90	ENSMUST00000130118	Ewsr1	1.09874	0.865931	1	up	Ensembl	649	chr11:5069974-5070891-	exon sense-overlapping	NM_007968	Ewsr1	chr11:5069687-5099088-
chr7	31040182	31040424	diffreps_peak_157878	1.66327	242	ENSMUST00000160006	Fxyd5	1.22813	0.0217135	0.0955671	up	Ensembl	885	chr7:31032730-31040424-	exon sense-overlapping	ENSMUST00000159924	Fxyd5	chr7:31032733-31042078-
chr2	166951270	166951620	diffreps_peak_105212	0.0122363	350	ENSMUST00000142481	Stau1	1.01184	0.972218	1	up	Ensembl	3573	chr2:166948147-166955384-	exon sense-overlapping	ENSMUST00000049412	Stau1	chr2:166948147-166996103-
chr14	31435981	31436078	diffreps_peak_52609	0.0351459	97	ENSMUST00000140002	Sh3bp5	1.00576	0.922261	1	up	Ensembl	1686	chr14:31359880-31436078-	exon sense-overlapping	ENSMUST00000091903	Sh3bp5	chr14:31373785-31436065-
chr18	37956692	37956780	diffreps_peak_83821	0.622114	88	ENSMUST00000164499	Rell2	1.27231	0.238718	0.653535	up	Ensembl	514	chr18:37956693-37958039+	exon sense-overlapping	ENSMUST00000176104	Rell2	chr18:37955147-37958545+
chr7	27343143	27343340	diffreps_peak_156975	8.01606	197	ENSMUST00000143239	Shkbp1	121.694	9.63704e-09	2.51295e-07	up	Ensembl	627	chr7:27343144-27348427-	exon sense-overlapping	NM_138676	Shkbp1	chr7:27342133-27356008-
chr7	24919081	24919320	diffreps_peak_156423	1.41159	239	ENSMUST00000145783	Arhgef1	1.37351	0.0387619	0.156859	up	Ensembl	4243	chr7:24904358-24926589+	exon sense-overlapping	NM_001130151	Arhgef1	chr7:24902986-24926591+
chr7	126759841	126759862	diffreps_peak_166065	0.408338	21	ENSMUST00000145965	Mapk3	1.2571	0.390536	0.894027	up	Ensembl	337	chr7:126759834-126763159+	exon sense-overlapping	ENSMUST00000050201	Mapk3	chr7:126759601-126764845+
chr3	127691941	127692160	diffreps_peak_114800	0.171136	219	ENSMUST00000159343	Gm16238	1.29583	0.674317	1	up	Ensembl	588	chr3:127691935-127692522-	intron sense-overlapping	NM_027808	Alpk1	chr3:127670310-127780527-
chr9	45869161	45869277	diffreps_peak_182283	1.18876	116	ENSMUST00000100407	Rnf214	1.32224	0.0647501	0.240188	up	Ensembl	437	chr9:45868877-45869489-	exon sense-overlapping	ENSMUST00000160699	Rnf214	chr9:45864834-45906894-
chr11	85821965	85822020	diffreps_peak_30697	0.12574	55	ENSMUST00000140562	Bcas3	1.07574	0.748617	1	up	Ensembl	253	chr11:85821966-85825307+	exon sense-overlapping	NM_001166642	Bcas3	chr11:85353164-85826058+
chr2	163611519	163611680	diffreps_peak_104655	9.02458	161	ENSMUST00000132904	Ttpal	121.333	9.44977e-10	1.59219e-07	up	Ensembl	608	chr2:163611520-163615426+	exon sense-overlapping	ENSMUST00000156839	Ttpal	chr2:163602563-163611897+
chr11	6012681	6012880	diffreps_peak_24027	0.038516	199	ENSMUST00000129098	Camk2b	1.09153	0.915133	1	up	Ensembl	4125	chr11:6011665-6065658-	exon sense-overlapping	ENSMUST00000093355	Camk2b	chr11:5971669-6065582-
chr10	127290562	127290660	diffreps_peak_22807	8.15036	98	ENSMUST00000174141	Gm4189	115.417	7.07364e-09	2.17213e-07	up	Ensembl	418	chr10:127289696-127290724-	bidirectional	ENSMUST00000139091	Ddit3	chr10:127290793-127296065+
chr3	88632912	88633160	diffreps_peak_111866	1.68106	248	ENSMUST00000176401	Arhgef2	1.48956	0.0208423	0.0922114	up	Ensembl	1072	chr3:88621460-88634462+	exon sense-overlapping	ENSMUST00000175911	Arhgef2	chr3:88622921-88640708+
chr11	102206421	102206720	diffreps_peak_32826	0.926336	299	ENSMUST00000149087	Hdac5	1.54641	0.118485	0.389331	up	Ensembl	5406	chr11:102195749-102218929-	exon sense-overlapping	ENSMUST00000131254	Hdac5	chr11:102206628-102218928-
chr2	158358361	158358600	diffreps_peak_104260	10.795	239	ENSMUST00000149667	9430008C03Rik	111.8	1.60313e-11	6.01441e-09	up	Ensembl	3728	chr2:158355953-158361513-	intergenic
chr12	72223261	72223539	diffreps_peak_39701	0.327445	278	ENSMUST00000144181	Rtn1	1.16873	0.470495	0.995019	up	Ensembl	465	chr12:72223233-72236686-	exon sense-overlapping	ENSMUST00000021497	Rtn1	chr12:72211753-72236724-
chr9	45895992	45896180	diffreps_peak_182292	0.578515	188	ENSMUST00000160325	Rnf214	1.36924	0.263928	0.698432	up	Ensembl	667	chr9:45895993-45900119-	exon sense-overlapping	ENSMUST00000160699	Rnf214	chr9:45864834-45906894-
chr19	4111721	4111980	diffreps_peak_87225	0.1608	259	ENSMUST00000128798	Pitpnm1	1.09596	0.690558	1	up	Ensembl	733	chr19:4111161-4112371+	exon sense-overlapping	ENSMUST00000049658	Pitpnm1	chr19:4099998-4113965+
chr11	84836420	84836535	diffreps_peak_30640	0.0734597	115	ENSMUST00000168267	Ggnbp2	1.03246	0.844385	1	up	Ensembl	385	chr11:84836421-84837984-	exon sense-overlapping	ENSMUST00000100686	Ggnbp2	chr11:84832972-84870740-
chr17	33997441	33997781	diffreps_peak_76516	8.38079	340	ENSMUST00000173317	H2-K1	109.714	4.16113e-09	1.60662e-07	up	Ensembl	885	chr17:33996592-33997781-	exon sense-overlapping	ENSMUST00000173075	H2-K1	chr17:33997363-34000260-
chrX	155623241	155623361	diffreps_peak_196579	0.486774	120	ENSMUST00000148217	Gm15156	1.50068	0.326006	0.798248	up	Ensembl	417	chrX:155622789-155623361+	natural antisense	NM_001093750	Ptchd1	chrX:155569736-155623327-
chr17	24901339	24901640	diffreps_peak_75012	0.467676	301	ENSMUST00000125648	Mapk8ip3	1.47276	0.340662	0.821101	up	Ensembl	751	chr17:24900544-24901718-	exon sense-overlapping	ENSMUST00000178969	Mapk8ip3	chr17:24897506-24936977-
chr4	42952981	42953180	diffreps_peak_119528	2.52609	199	ENSMUST00000142332	Dnajb5	1.75476	0.00297789	0.0161666	up	Ensembl	5052	chr4:42950351-42958732+	exon sense-overlapping	ENSMUST00000107973	Dnajb5	chr4:42953094-42958723+
chr11	77842147	77842380	diffreps_peak_29761	0.186731	233	ENSMUST00000100443	Myo18a	1.04711	0.650533	1	up	Ensembl	3807	chr11:77840933-77844878+	exon sense-overlapping	ENSMUST00000130305	Myo18a	chr11:77801350-77865109+
chr3	121796401	121796485	diffreps_peak_114415	0.097467	84	ENSMUST00000161742	Abcd3	1.26786	0.798975	1	up	Ensembl	648	chr3:121796037-121815207-	exon sense-overlapping	NM_008991	Abcd3	chr3:121758910-121815215-
chr7	100634361	100634560	diffreps_peak_163889	0.527536	199	ENSMUST00000123960	Rab6a	1.40735	0.2968	0.751095	up	Ensembl	567	chr7:100634348-100639363+	exon sense-overlapping	ENSMUST00000032946	Rab6a	chr7:100607586-100641268+
chr4	133055294	133055360	diffreps_peak_126278	0.204626	66	ENSMUST00000154482	Ahdc1	1.1382	0.624272	1	up	Ensembl	801	chr4:133012050-133060822+	exon sense-overlapping	ENSMUST00000105915	Ahdc1	chr4:133011506-133077863+
chr5	66997091	66997140	diffreps_peak_134763	0.0289918	49	ENSMUST00000137394	Limch1	1.01216	0.935423	1	up	Ensembl	680	chr5:66997092-66999346+	exon sense-overlapping	NM_001001980	Limch1	chr5:66745840-67057159+
chr2	29914301	29914510	diffreps_peak_94750	0.33718	209	ENSMUST00000131165	Odf2	1.18898	0.460066	0.982743	up	Ensembl	553	chr2:29912624-29915277+	exon sense-overlapping	NM_001177659	Odf2	chr2:29889720-29931746+
chr16	44198903	44199060	diffreps_peak_69904	0.0935958	157	ENSMUST00000141015	Gm608	1.05082	0.806128	1	up	Ensembl	706	chr16:44173397-44215468+	exon sense-overlapping	ENSMUST00000088356	Gm608	chr16:44173397-44212932+
chr14	60039901	60040160	diffreps_peak_54533	8.20623	259	ENSMUST00000132939	Gm9013	107.455	6.21977e-09	2.00466e-07	up	Ensembl	882	chr14:60039610-60040491-	intron sense-overlapping	NM_015803	Atp8a2	chr14:59647741-60086834-
chr5	115988401	115988820	diffreps_peak_138658	0.653113	419	ENSMUST00000134609	Cit	1.56722	0.222273	0.621204	up	Ensembl	3456	chr5:115987174-115990790+	exon sense-overlapping	NM_007708	Cit	chr5:115845656-116006341+
chr17	35703981	35704220	diffreps_peak_76929	0.214047	239	ENSMUST00000135203	Gm4577	1.6373	0.610875	1	up	Ensembl	716	chr17:35703896-35708244+	natural antisense	NM_007584	Ddr1	chr17:35681567-35704139-
chr4	120542481	120542700	diffreps_peak_124679	0.28372	219	ENSMUST00000147980	Ctps	1.27929	0.520332	1	up	Ensembl	905	chr4:120541911-120545067-	exon sense-overlapping	ENSMUST00000030381	Ctps	chr4:120539868-120570276-
chr11	72057881	72058169	diffreps_peak_29093	1.16232	288	ENSMUST00000132781	Pitpnm3	1.62466	0.0688146	0.252588	up	Ensembl	879	chr11:72057645-72061561-	exon sense-overlapping	ENSMUST00000108508	Pitpnm3	chr11:72047528-72135721-
chr5	74594821	74595200	diffreps_peak_135278	0.0218656	379	ENSMUST00000125129	Fip1l1	1.01816	0.950899	1	up	Ensembl	547	chr5:74594743-74595916+	exon sense-overlapping	ENSMUST00000080164	Fip1l1	chr5:74535449-74598790+
chr15	79727981	79728260	diffreps_peak_63306	0.0636234	279	ENSMUST00000162392	Sun2	1.03189	0.863727	1	up	Ensembl	4052	chr15:79724070-79742456-	exon sense-overlapping	ENSMUST00000159660	Sun2	chr15:79738650-79742115-
chr2	147186304	147186455	diffreps_peak_103016	7.94296	151	ENSMUST00000109969	Nkx2-2	105	1.14034e-08	2.77866e-07	up	Ensembl	340	chr2:147186305-147194243-	exon sense-overlapping	ENSMUST00000067075	Nkx2-2	chr2:147183083-147186402-
chr13	48968121	48968380	diffreps_peak_46310	7.75782	259	NR_015601	Fam120aos	104.757	1.74655e-08	3.46132e-07	up	RefSeq	1565	chr13:48968112-48969905+	bidirectional	uc007qio.1	Fam120a	chr13:48879217-48967828-
chr1	124046101	124046412	diffreps_peak_8105	7.9346	311	ENSMUST00000097605	Gm10543	103.727	1.16253e-08	2.80582e-07	up	Ensembl	1588	chr1:124044823-124046412+	natural antisense	ENSMUST00000112606	Dpp10	chr1:123332142-124045559-
chr7	45009001	45009200	diffreps_peak_159174	0.0371212	199	ENSMUST00000148227	Scaf1	1.02293	0.918076	1	up	Ensembl	6459	chr7:45002948-45013973-	exon sense-overlapping	ENSMUST00000151264	Scaf1	chr7:45013252-45015857-
chr7	25156541	25156630	diffreps_peak_156631	9.45474	89	NR_045847	D930028M14Rik	98.031	3.50966e-10	7.39943e-08	up	RefSeq	1006	chr7:25152457-25156630+	exon sense-overlapping	ENSMUST00000098678	D930028M14Rik	chr7:25152457-25156623+
chr11	77841161	77842008	diffreps_peak_29759	4.69128	847	ENSMUST00000100443	Myo18a	1.26167	2.03571e-05	0.000151305	up	Ensembl	3807	chr11:77840933-77844878+	exon sense-overlapping	NM_001291212	Myo18a	chr11:77777235-77865988+
chr2	4433281	4433500	diffreps_peak_92222	0.0392805	219	ENSMUST00000141746	Frmd4a	1.03333	0.913523	1	up	Ensembl	2412	chr2:4389616-4433512+	exon sense-overlapping	ENSMUST00000091497	Frmd4a	chr2:4152872-4613942+
chr7	139094261	139094462	diffreps_peak_167041	7.68145	201	ENSMUST00000122844	Dpysl4	95.4141	2.08232e-08	3.87287e-07	up	Ensembl	3156	chr7:139086028-139101783+	exon sense-overlapping	NM_011993	Dpysl4	chr7:139086001-139101791+
chr17	78199761	78200000	diffreps_peak_80394	8.07725	239	uc008dot.1	AK144664	94.775	8.37057e-09	2.32919e-07	up	UCSC_knowngene	528	chr17:78199256-78200025-	bidirectional	NM_015800	Crim1	chr17:78200248-78376592+
chr10	59807201	59807400	diffreps_peak_16933	0.0898891	199	ENSMUST00000032395	Gm7399	1.18797	0.813038	1	up	Ensembl	858	chr10:59806557-59807414+	intron sense-overlapping	NM_001291443	Micu1	chr10:59702563-59864134+
chr11	85832221	85832388	diffreps_peak_30708	0.0753224	167	NR_077059	2610027K06Rik	1.22736	0.840771	1	up	RefSeq	2326	chr11:85791660-85832388-	natural antisense	ENSMUST00000074875	Bcas3	chr11:85353212-85825350+
chr15	78436900	78437240	diffreps_peak_62934	0.101769	340	ENSMUST00000160916	Kctd17	1.04579	0.791099	1	up	Ensembl	1146	chr15:78432987-78437734+	exon sense-overlapping	NM_001289673	Kctd17	chr15:78428564-78439303+
chr1	36742277	36742376	diffreps_peak_2414	7.90783	99	NR_040290	4933424G06Rik	91.5323	1.23644e-08	2.87155e-07	up	RefSeq	1127	chr1:36714538-36757960+	bidirectional	ENSMUST00000160084	Actr1b	chr1:36701784-36714422-
chr6	34685962	34686340	diffreps_peak_145480	0.595152	378	ENSMUST00000155714	Cald1	1.80018	0.254008	0.681297	up	Ensembl	1422	chr6:34598544-34687173+	exon sense-overlapping	ENSMUST00000142512	Cald1	chr6:34598512-34753588+
chr5	115127321	115127513	diffreps_peak_138368	8.0645	192	ENSMUST00000137140	Unc119b	89.2727	8.61991e-09	2.35474e-07	up	Ensembl	924	chr5:115124962-115127513-	exon sense-overlapping	ENSMUST00000060798	Unc119b	chr5:115122550-115134975-
chr16	31942495	31942619	diffreps_peak_68813	8.09084	124	ENSMUST00000134666	Pigz	89.25	8.1126e-09	2.31207e-07	up	Ensembl	238	chr16:31941993-31942619+	exon sense-overlapping	NM_172822	Pigz	chr16:31933851-31946046+
chr4	155249965	155250180	diffreps_peak_129468	8.09942	215	NR_033802	2610002J02Rik	79.95	7.95398e-09	2.29815e-07	up	RefSeq	1519	chr4:155249966-155256687+	exon sense-overlapping	ENSMUST00000178473	2610002J02Rik	chr4:155249966-155256687+
chr13	91657318	91657320	diffreps_peak_49034	7.84605	2	ENSMUST00000133984	Ssbp2	79.3143	1.42544e-08	3.05841e-07	up	Ensembl	687	chr13:91539343-91657776+	exon sense-overlapping	NM_024186	Ssbp2	chr13:91461097-91706175+
chr4	138256734	138257000	diffreps_peak_127079	0.258512	266	ENSMUST00000154421	Sh2d5	1.18346	0.551428	1	up	Ensembl	882	chr4:138256735-138259111+	exon sense-overlapping	ENSMUST00000105823	Sh2d5	chr4:138250464-138261332+
chr17	47689421	47689700	diffreps_peak_78148	7.64968	279	NR_045945	Tomm6os	79.2456	2.24037e-08	4.047e-07	up	RefSeq	2953	chr17:47687610-47691092+	natural antisense	ENSMUST00000113301	Tomm6	chr17:47686740-47688068-
chr7	130182640	130182778	diffreps_peak_166724	8.81931	138	ENSMUST00000147859	Fgfr2	76.7955	1.51596e-09	1.60662e-07	up	Ensembl	335	chr7:130177780-130182778-	exon sense-overlapping	NM_010207	Fgfr2	chr7:130162451-130266808-
chr2	122467501	122467797	diffreps_peak_101397	7.89605	296	NR_027919	Bambi-ps1	73.9091	1.27043e-08	2.88816e-07	up	RefSeq	1215	chr2:122466583-122467797-	intergenic
chr9	122358920	122359060	diffreps_peak_188408	5.83274	140	uc009sev.1	Abhd5	73.6	1.46982e-06	1.28057e-05	up	UCSC_knowngene	583	chr9:122351616-122359279+	exon sense-overlapping	ENSMUST00000156520	Abhd5	chr9:122351608-122381524+
chr2	155994565	155994660	diffreps_peak_103890	0.106319	95	ENSMUST00000124812	6430550D23Rik	1.31322	0.782854	1	up	Ensembl	2429	chr2:155973279-156007907-	exon sense-overlapping	ENSMUST00000086145	6430550D23Rik	chr2:156000444-156007919-
chr7	44909219	44909374	diffreps_peak_159129	0.0536699	155	ENSMUST00000164575	Ap2a1	1.02849	0.883751	1	up	Ensembl	810	chr7:44906114-44909829-	exon sense-overlapping	NM_001077264	Ap2a1	chr7:44900373-44929490-
chr1	60900897	60901180	diffreps_peak_3955	8.19566	283	ENSMUST00000121555	Rpl18-ps1	73.2778	6.37296e-09	2.03901e-07	up	Ensembl	525	chr1:60900898-60901422+	intergenic
chr11	77842261	77842540	diffreps_peak_29763	0.0163947	279	ENSMUST00000100443	Myo18a	1.03071	0.962954	1	up	Ensembl	3807	chr11:77840933-77844878+	exon sense-overlapping	NM_011586	Myo18a	chr11:77777235-77865988+
chr7	59324101	59324149	diffreps_peak_160617	0.116161	48	NR_015479	C230091D08Rik	1.16071	0.765313	1	up	RefSeq	3708	chr7:59307924-59324149-	intergenic
chr3	126934525	126934820	diffreps_peak_114664	0.397143	295	ENSMUST00000182271	Ank2	1.10433	0.400735	0.907217	up	Ensembl	623	chr3:126933196-126935117-	exon sense-overlapping	ENSMUST00000182078	Ank2	chr3:126921612-126976086-
chr10	114801501	114801820	diffreps_peak_21890	0.20101	319	ENSMUST00000152702	Trhde	1.32251	0.629492	1	up	Ensembl	3557	chr10:114566167-114802307-	exon sense-overlapping	ENSMUST00000061632	Trhde	chr10:114398823-114801364-
chr15	79430121	79430183	diffreps_peak_63230	0.316075	62	ENSMUST00000135583	Gm16059	1.29155	0.482976	1	up	Ensembl	3778	chr15:79427220-79431629+	natural antisense	NM_001289898	Csnk1e	chr15:79417852-79442057-
chr7	80398421	80398860	diffreps_peak_162311	0.502556	439	ENSMUST00000153446	Furin	1.7664	0.314372	0.779924	up	Ensembl	2778	chr7:80396310-80399469-	exon sense-overlapping	NM_011046	Furin	chr7:80389194-80402762-
chr5	115544201	115544569	diffreps_peak_138484	0.705221	368	ENSMUST00000134198	Pxn	1.65615	0.197142	0.569019	up	Ensembl	524	chr5:115544114-115544948+	exon sense-overlapping	NM_133915	Pxn	chr5:115506676-115555987+
chrX	136214621	136214820	diffreps_peak_195483	0.0958149	199	ENSMUST00000142172	Bex1	1.26016	0.80202	1	up	Ensembl	481	chrX:136214544-136215380-	exon sense-overlapping	NM_009052	Bex1	chrX:136213972-136215513-
chr11	84962521	84962555	diffreps_peak_30668	7.83165	34	ENSMUST00000139416	Car4	71.5484	1.47349e-08	3.11648e-07	up	Ensembl	435	chr11:84957786-84962555+	exon sense-overlapping	ENSMUST00000103194	Car4	chr11:84957788-84966044+
chr3	89737881	89738173	diffreps_peak_112148	1.41155	292	ENSMUST00000150637	Adar	1.52296	0.038766	0.156872	up	Ensembl	708	chr3:89737586-89739289+	exon sense-overlapping	ENSMUST00000118341	Adar	chr3:89730748-89751406+
chr1	178336046	178336405	diffreps_peak_12077	1.27165	359	ENSMUST00000134291	Hnrnpu	1.39138	0.0534991	0.205507	up	Ensembl	673	chr1:178335642-178336405-	exon sense-overlapping	NM_016805	Hnrnpu	chr1:178328300-178337784-
chr10	80285249	80285435	diffreps_peak_19021	0.105393	186	ENSMUST00000138032	Dazap1	1.30818	0.784525	1	up	Ensembl	1100	chr10:80280423-80285435+	exon sense-overlapping	ENSMUST00000092305	Dazap1	chr10:80265074-80288408+
chr6	86527021	86527260	diffreps_peak_149042	0.121867	239	uc009csd.1	1600020E01Rik	1.21479	0.755323	1	up	UCSC_knowngene	2099	chr6:86526271-86564449+	bidirectional	uc009csc.1	Pcbp1	chr6:86524497-86526165-
chr4	127203305	127203400	diffreps_peak_125457	0.131562	95	ENSMUST00000137062	Dlgap3	1.12687	0.738649	1	up	Ensembl	438	chr4:127203306-127214754+	exon sense-overlapping	NM_198618	Dlgap3	chr4:127169204-127237022+
chr8	13015321	13015365	diffreps_peak_168835	0.968779	44	ENSMUST00000127229	Mcf2l	2.82916	0.107454	0.362156	up	Ensembl	666	chr8:13013062-13015365+	exon sense-overlapping	ENSMUST00000123811	Mcf2l	chr8:13011494-13020527+
chr11	70044201	70044367	diffreps_peak_28823	0.286525	166	ENSMUST00000131497	Dlg4	1.12878	0.516982	1	up	Ensembl	301	chr11:70044197-70044718+	exon sense-overlapping	ENSMUST00000108589	Dlg4	chr11:70017085-70045532+
chr2	166075771	166075840	diffreps_peak_105072	1.06987	69	ENSMUST00000125503	Sulf2	2.19405	0.08514	0.300801	up	Ensembl	450	chr2:166074670-166076018-	exon sense-overlapping	ENSMUST00000109249	Sulf2	chr2:166073089-166155663-
chrX	152369027	152369116	diffreps_peak_196449	8.18331	89	NR_045452	3010001F23Rik	71.25	6.55674e-09	2.07833e-07	up	RefSeq	892	chrX:152369028-152416702+	bidirectional	ENSMUST00000070316	Gpr173	chrX:152343598-152368704-
chr10	19191241	19191251	diffreps_peak_14395	8.11659	10	NR_038021	Gm20139	68.2222	7.64553e-09	2.25993e-07	up	RefSeq	6208	chr10:19141749-19207947+	intergenic
chr2	34648894	34649000	diffreps_peak_95647	5.42632	106	ENSMUST00000100173	Gm13414	68.1	3.74701e-06	3.06517e-05	up	Ensembl	1468	chr2:34648895-34650362-	intergenic
chr5	136485521	136485851	diffreps_peak_141882	2.34781	330	ENSMUST00000177305	Cux1	1.32754	0.00448941	0.0234646	up	Ensembl	3290	chr5:136482875-136567490-	exon sense-overlapping	ENSMUST00000176745	Cux1	chr5:136248136-136567264-
chr3	108284001	108284200	diffreps_peak_113785	9.43451	199	ENSMUST00000148844	Gm12523	67.575	3.67693e-10	7.66629e-08	up	Ensembl	599	chr3:108283898-108284843-	natural antisense	NM_019972	Sort1	chr3:108284064-108361519+
chr3	51561021	51561220	diffreps_peak_109745	0.323682	199	ENSMUST00000180404	5031434O11Rik	1.56087	0.474589	0.999559	up	Ensembl	3727	chr3:51560036-51567114+	natural antisense	NM_080793	Setd7	chr3:51515318-51560823-
chrX	20695861	20696100	diffreps_peak_189455	0.102051	239	ENSMUST00000122944	Cdk16	1.05412	0.790586	1	up	Ensembl	420	chrX:20695861-20696485+	exon sense-overlapping	ENSMUST00000115364	Cdk16	chrX:20687954-20699880+
chr9	3013989	3014160	diffreps_peak_178549	0.640076	171	ENSMUST00000181242	Gm26870	2.6129	0.229047	0.634382	up	Ensembl	1170	chr9:3000282-3018084-	natural antisense	ENSMUST00000143083	Gm10721	chr9:3013140-3014344+
chr17	34631403	34631440	diffreps_peak_76625	0.114719	37	ENSMUST00000172945	Prrt1	1.07666	0.767858	1	up	Ensembl	866	chr17:34631404-34632397+	exon sense-overlapping	ENSMUST00000015620	Prrt1	chr17:34629533-34633126+
chr16	91816825	91816957	diffreps_peak_72637	0.824754	132	ENSMUST00000151044	Itsn1	1.50311	0.149708	0.46267	up	Ensembl	723	chr16:91816826-91827897+	exon sense-overlapping	ENSMUST00000135057	Itsn1	chr16:91782161-91818629+
chr16	30388401	30388837	diffreps_peak_68722	0.858275	436	ENSMUST00000136065	Atp13a3	2.91128	0.138588	0.436528	up	Ensembl	2250	chr16:30385893-30388837-	exon sense-overlapping	NM_001128096	Atp13a3	chr16:30312424-30388530-
chr10	41481706	41481860	diffreps_peak_15824	7.56123	154	ENSMUST00000136681	Mical1	65.9571	2.74641e-08	4.63571e-07	up	Ensembl	696	chr10:41481707-41482716+	exon sense-overlapping	ENSMUST00000099934	Mical1	chr10:41476368-41487032+
chr11	60241821	60241930	diffreps_peak_27606	0.0300055	109	ENSMUST00000139025	Gm12265	1.00979	0.933242	1	up	Ensembl	468	chr11:60240810-60241930+	natural antisense	NM_001039092	Tom1l2	chr11:60226714-60352905-
chr11	99213301	99213443	diffreps_peak_32329	0.0134439	142	ENSMUST00000156160	Smarce1	1.00128	0.969518	1	up	Ensembl	610	chr11:99209992-99213443-	exon sense-overlapping	NM_020618	Smarce1	chr11:99209048-99231017-
chr15	100586281	100586772	diffreps_peak_65744	0.804689	491	ENSMUST00000176271	Pou6f1	1.44579	0.156788	0.479465	up	Ensembl	5301	chr15:100575318-100592037-	exon sense-overlapping	ENSMUST00000058274	Pou6f1	chr15:100578247-100595034-
chr5	140693278	140693543	diffreps_peak_142567	0.399225	265	ENSMUST00000139382	Iqce	1.27247	0.398818	0.904592	up	Ensembl	472	chr5:140693279-140702294-	exon sense-overlapping	ENSMUST00000077890	Iqce	chr5:140665280-140702339-
chr7	19703181	19703391	diffreps_peak_156039	7.52521	210	ENSMUST00000174476	Tomm40	64.6302	2.98396e-08	4.90036e-07	up	Ensembl	620	chr7:19701821-19710965-	exon sense-overlapping	NM_016871	Tomm40	chr7:19701313-19715429-
chr5	123590661	123590845	diffreps_peak_139936	6.02267	184	ENSMUST00000154432	Clip1	1.81391	9.49141e-07	8.55813e-06	up	Ensembl	898	chr5:123590069-123603719-	exon sense-overlapping	ENSMUST00000111566	Clip1	chr5:123577795-123684618-
chr11	5874221	5874420	diffreps_peak_23980	8.28034	199	ENSMUST00000136714	Pold2	62.8226	5.24394e-09	1.75815e-07	up	Ensembl	611	chr11:5874117-5876764-	exon sense-overlapping	ENSMUST00000102922	Pold2	chr11:5872180-5878292-
chrX	7934171	7934340	diffreps_peak_188860	0.401539	169	ENSMUST00000153788	Hdac6	2.47768	0.396699	0.901872	up	Ensembl	894	chrX:7931555-7934485-	exon sense-overlapping	NM_010413	Hdac6	chrX:7930122-7947889-
chr11	97149990	97150048	diffreps_peak_31656	0.0457345	58	ENSMUST00000107613	Tbkbp1	1.18183	0.900048	1	up	Ensembl	2173	chr11:97138406-97150048-	exon sense-overlapping	ENSMUST00000107614	Tbkbp1	chr11:97137099-97151036-
chr4	147040684	147040960	diffreps_peak_128170	8.11815	276	ENSMUST00000120969	Gm13153	62.2727	7.61823e-09	2.25758e-07	up	Ensembl	637	chr4:147040685-147041321+	intron sense-overlapping	NM_001177767	Rex2	chr4:147021850-147060799+
chr2	49732610	49732840	diffreps_peak_96546	0.153813	230	ENSMUST00000152353	Kif5c	1.08696	0.701757	1	up	Ensembl	383	chr2:49732611-49735575+	exon sense-overlapping	NM_008449	Kif5c	chr2:49619314-49774778+
chr5	33745015	33745480	diffreps_peak_132397	1.12938	465	ENSMUST00000149886	Letm1	1.19099	0.0742368	0.2688	up	Ensembl	3056	chr5:33742534-33753562-	exon sense-overlapping	NM_019694	Letm1	chr5:33741352-33782704-
chr11	84871203	84871320	diffreps_peak_30650	0.349215	117	NR_131197	Ggnbp2os	1.79111	0.447492	0.968234	up	RefSeq	584	chr11:84870923-84871631+	bidirectional	ENSMUST00000166425	Ggnbp2	chr11:84860719-84870491-
chr15	34082693	34083160	diffreps_peak_60025	0.747095	467	ENSMUST00000172082	Mtdh	1.62017	0.179021	0.529678	up	Ensembl	4582	chr15:34082694-34103345+	exon sense-overlapping	ENSMUST00000163333	Mtdh	chr15:34083308-34136780+
chr4	150246569	150246892	diffreps_peak_128685	2.97331	323	ENSMUST00000135063	Eno1	1.50986	0.00106339	0.0062696	up	Ensembl	686	chr4:150244235-150246892+	exon sense-overlapping	ENSMUST00000080926	Eno1	chr4:150236952-150248879+
chr18	5758964	5759184	diffreps_peak_81660	0.0809825	220	ENSMUST00000177070	Zeb1	1.03336	0.829884	1	up	Ensembl	819	chr18:5593861-5759184+	exon sense-overlapping	ENSMUST00000160910	Zeb1	chr18:5593602-5759057+
chr14	66355585	66355853	diffreps_peak_54962	3.48673	268	ENSMUST00000123435	Stmn4	1.66261	0.000326039	0.00208571	up	Ensembl	405	chr14:66344367-66355853+	exon sense-overlapping	ENSMUST00000118426	Stmn4	chr14:66344373-66361674+
chr17	28600321	28600886	diffreps_peak_75866	0.408926	565	ENSMUST00000126683	Srpk1	1.06899	0.390009	0.893378	up	Ensembl	4956	chr17:28595463-28600886-	exon sense-overlapping	NM_016795	Srpk1	chr17:28589592-28622454-
chr4	143242321	143242580	diffreps_peak_127945	0.327479	259	ENSMUST00000122149	Gm13050	1.59712	0.470458	0.994998	up	Ensembl	1345	chr4:143242024-143243368-	intergenic
chr6	83194987	83195287	diffreps_peak_148713	0.164522	300	ENSMUST00000154420	Dctn1	1.0846	0.684665	1	up	Ensembl	481	chr6:83194543-83195287+	exon sense-overlapping	NM_001198866	Dctn1	chr6:83165924-83200117+
chr9	58229827	58230180	diffreps_peak_183329	1.19357	353	uc009pwn.1	Pml	1.74177	0.0640368	0.237964	up	UCSC_knowngene	4744	chr9:58218086-58249786-	exon sense-overlapping	ENSMUST00000124063	Pml	chr9:58219751-58249660-
chr6	86684224	86684491	diffreps_peak_149061	0.633984	267	ENSMUST00000131674	Snrnp27	1.23255	0.232282	0.640813	up	Ensembl	822	chr6:86675405-86684491-	exon sense-overlapping	ENSMUST00000113683	Snrnp27	chr6:86675672-86684522-
chr3	87913960	87914237	diffreps_peak_111684	0.343575	277	ENSMUST00000160312	Hdgf	1.11163	0.453341	0.975077	up	Ensembl	582	chr3:87913961-87914777+	exon sense-overlapping	ENSMUST00000159492	Hdgf	chr3:87906850-87914687+
chr7	45451361	45451658	diffreps_peak_159405	0.075097	297	ENSMUST00000140994	Gys1	1.03862	0.841207	1	up	Ensembl	1000	chr7:45451025-45452116+	exon sense-overlapping	ENSMUST00000107766	Gys1	chr7:45434877-45455847+
chr6	113283221	113283420	diffreps_peak_150872	0.0402957	199	ENSMUST00000124574	Cpne9	1.03576	0.91139	1	up	Ensembl	482	chr6:113282335-113283429+	exon sense-overlapping	ENSMUST00000041203	Cpne9	chr6:113282307-113305569+
chr7	138909362	138909519	diffreps_peak_166997	0.114324	157	ENSMUST00000148970	Bnip3	1.05556	0.768557	1	up	Ensembl	446	chr7:138898540-138909519-	exon sense-overlapping	NM_009760	Bnip3	chr7:138890836-138909506-
chr16	36886350	36886440	diffreps_peak_69307	0.00809221	90	NR_040476	4930565N06Rik	1.00291	0.98154	1	up	RefSeq	2416	chr16:36880519-36897189-	intronic antisense	ENSMUST00000135406	Golgb1	chr16:36875141-36889399+
chr17	46251113	46251480	diffreps_peak_77724	0.887936	367	ENSMUST00000151488	Yipf3	2.11181	0.129439	0.413724	up	Ensembl	1570	chr17:46248145-46252001+	exon sense-overlapping	ENSMUST00000123311	Yipf3	chr17:46248125-46251488+
chr9	75071061	75071300	diffreps_peak_184623	0.618072	239	ENSMUST00000149823	Myo5a	1.70374	0.240951	0.657468	up	Ensembl	1768	chr9:75071015-75117308+	exon sense-overlapping	ENSMUST00000136731	Myo5a	chr9:75071600-75218953+
chr10	69992281	69992475	diffreps_peak_17654	0.0711836	194	uc007fnn.1	Ank3	1.05133	0.848822	1	up	UCSC_knowngene	7274	chr10:69989935-70027436+	exon sense-overlapping	ENSMUST00000182155	Ank3	chr10:69533843-70024626+
chr9	124442139	124442200	diffreps_peak_188546	0.0344614	61	uc029xhf.1	BC095938	1.17017	0.923716	1	up	UCSC_knowngene	358	chr9:124441769-124442751-	intergenic
chr6	136827961	136828160	diffreps_peak_153153	0.0396898	199	uc009emh.1	AK044622	1.00538	0.912663	1	up	UCSC_knowngene	1706	chr6:136827644-136829349+	natural antisense	NM_021714	Wbp11	chr6:136813654-136828216-
chr5	104498741	104498940	diffreps_peak_137115	9.21302	199	ENSMUST00000133540	Pkd2	62.125	6.12319e-10	1.13988e-07	up	Ensembl	5130	chr5:104492771-104501349+	exon sense-overlapping	NM_008861	Pkd2	chr5:104459457-104505819+
chr15	76427511	76427720	diffreps_peak_62509	0.166185	209	ENSMUST00000160986	Mroh1	1.30396	0.682048	1	up	Ensembl	9830	chr15:76380523-76453035+	natural antisense	ENSMUST00000023217	Bop1	chr15:76452996-76477269-
chr5	57717341	57718040	diffreps_peak_134213	1.34315	699	uc012dwh.1	AK034221	1.56777	0.0453783	0.17928	up	UCSC_knowngene	4062	chr5:57716140-57720201-	natural antisense	NM_001122758	Pcdh7	chr5:57718021-58132240+
chr3	158012779	158013120	diffreps_peak_116341	0.242992	341	ENSMUST00000156303	Srsf11	1.13901	0.57149	1	up	Ensembl	474	chr3:158012343-158013147-	exon sense-overlapping	ENSMUST00000069025	Srsf11	chr3:158011503-158023140-
chr11	70608661	70608828	diffreps_peak_28898	0.353263	167	ENSMUST00000152857	Mink1	1.30912	0.44334	0.963197	up	Ensembl	697	chr11:70607812-70608828+	exon sense-overlapping	NM_176893	Mink1	chr11:70562881-70614482+
chrX	67623261	67623341	diffreps_peak_191769	4.95912	80	ENSMUST00000180027	Gm14693	61.7	1.0987e-05	8.45018e-05	up	Ensembl	447	chrX:67622895-67623341+	intergenic
chr6	6735901	6736280	diffreps_peak_143896	7.79395	379	ENSMUST00000177157	Gm5873	60.959	1.60711e-08	3.29663e-07	up	Ensembl	1066	chr6:6735427-6736492-	intergenic
chr2	105394681	105395000	diffreps_peak_100223	1.40632	319	ENSMUST00000127019	Rcn1	1.51791	0.0392356	0.158495	up	Ensembl	2208	chr2:105386929-105395348-	exon sense-overlapping	ENSMUST00000006128	Rcn1	chr2:105386291-105399319-
chr19	47622501	47622694	diffreps_peak_91109	0.164979	193	ENSMUST00000123816	Slk	1.21122	0.683945	1	up	Ensembl	792	chr19:47620670-47625354+	exon sense-overlapping	NM_001164639	Slk	chr19:47580019-47645246+
chr2	26327421	26327680	diffreps_peak_94264	7.48106	259	ENSMUST00000132638	Gpsm1	58.2385	3.30321e-08	5.24931e-07	up	Ensembl	664	chr2:26325333-26327686+	exon sense-overlapping	ENSMUST00000066936	Gpsm1	chr2:26315515-26348237+
chr17	56584901	56585300	diffreps_peak_78974	0.165162	399	ENSMUST00000182031	Safb	1.15122	0.683657	1	up	Ensembl	1755	chr17:56584825-56596523+	exon sense-overlapping	NM_001163300	Safb	chr17:56584982-56606294+
chr19	57135683	57135725	diffreps_peak_91705	0.022835	42	ENSMUST00000128212	Ablim1	1.12269	0.948779	1	up	Ensembl	987	chr19:57130264-57135725-	exon sense-overlapping	ENSMUST00000133369	Ablim1	chr19:57130846-57182308-
chr5	113275886	113276172	diffreps_peak_138102	1.2983	286	ENSMUST00000156340	Sgsm1	1.50315	0.0503156	0.195761	up	Ensembl	490	chr5:113275887-113279336-	exon sense-overlapping	ENSMUST00000112325	Sgsm1	chr5:113265674-113310739-
chr14	54649901	54650200	diffreps_peak_53964	0.0792363	299	ENSMUST00000167495	Acin1	1.06654	0.833228	1	up	Ensembl	1352	chr14:54645211-54650268-	exon sense-overlapping	ENSMUST00000150371	Acin1	chr14:54642167-54653682-
chr13	9689581	9689880	diffreps_peak_43945	0.517992	299	ENSMUST00000137932	Zmynd11	1.23726	0.303395	0.761749	up	Ensembl	4355	chr13:9684841-9691273-	exon sense-overlapping	ENSMUST00000110633	Zmynd11	chr13:9686862-9720928-
chr10	80826761	80826980	diffreps_peak_19322	0.114151	219	ENSMUST00000179894	Oaz1	1.07988	0.768864	1	up	Ensembl	2526	chr10:80826682-80829284+	exon sense-overlapping	NM_001301034	Oaz1	chr10:80826656-80829290+
chr2	20713081	20713234	diffreps_peak_93467	0.0355424	153	ENSMUST00000137186	Gm13362	1.01082	0.92142	1	up	Ensembl	839	chr2:20709375-20713234-	natural antisense	ENSMUST00000045555	Etl4	chr2:20510047-20810524+
chr14	56672261	56672560	diffreps_peak_54348	0.797276	299	ENSMUST00000130246	Mphosph8	1.24873	0.159487	0.485827	up	Ensembl	416	chr14:56672232-56673977+	exon sense-overlapping	NM_023773	Mphosph8	chr14:56668248-56697429+
chr1	153229041	153229260	diffreps_peak_10309	0.45703	219	ENSMUST00000160515	Lamc1	1.33825	0.349116	0.83481	up	Ensembl	466	chr1:153228761-153229418-	exon sense-overlapping	NM_010683	Lamc1	chr1:153218922-153332786-
chr6	121378959	121379480	diffreps_peak_151972	1.02551	521	NR_110358	Iqsec3	1.44118	0.0942958	0.326157	up	RefSeq	7540	chr6:121372928-121473678-	exon sense-overlapping	NM_001289685	Iqsec3	chr6:121372928-121473678-
chr11	3213259	3213420	diffreps_peak_23490	0.37182	161	ENSMUST00000131693	Eif4enif1	1.47314	0.424796	0.9393	up	Ensembl	405	chr11:3202689-3213434+	exon sense-overlapping	NM_001166548	Eif4enif1	chr11:3202353-3244588+
chr2	104257161	104257640	diffreps_peak_100138	0.423442	479	ENSMUST00000149165	D430041D05Rik	1.31573	0.377188	0.876134	up	Ensembl	4291	chr2:104207666-104257984-	exon sense-overlapping	ENSMUST00000141159	D430041D05Rik	chr2:104143073-104257400-
chr18	77563861	77564400	diffreps_peak_86301	7.40034	539	ENSMUST00000182294	Rnf165	57.9679	3.97794e-08	5.96811e-07	up	Ensembl	2517	chr18:77562093-77564609-	intron sense-overlapping	ENSMUST00000182024	Rnf165	chr18:77458685-77565147-
chr9	112156121	112156380	diffreps_peak_187444	0.406265	259	ENSMUST00000159432	Arpp21	1.12804	0.392405	0.896032	up	Ensembl	5320	chr9:112065236-112234423-	exon sense-overlapping	NM_001177623	Arpp21	chr9:112159983-112217351-
chr14	73797081	73797290	diffreps_peak_55586	0.0994645	209	ENSMUST00000100510	Gm16409	1.38183	0.795308	1	up	Ensembl	750	chr14:73796541-73797290-	intergenic
chr3	62377587	62377720	diffreps_peak_110390	0.241453	133	ENSMUST00000161493	Arhgef26	1.38972	0.573517	1	up	Ensembl	901	chr3:62340390-62378118+	exon sense-overlapping	NM_001081295	Arhgef26	chr3:62338777-62462221+
chr2	110041201	110041400	diffreps_peak_100360	1.3027	199	ENSMUST00000155110	Ccdc34	1.794	0.0498084	0.194081	up	Ensembl	986	chr2:110040895-110044664+	exon sense-overlapping	NM_026613	Ccdc34	chr2:110017817-110045325+
chr2	163721127	163721440	diffreps_peak_104664	0.70989	313	ENSMUST00000147385	Pkig	1.68616	0.195034	0.564486	up	Ensembl	2808	chr2:163658386-163723758+	exon sense-overlapping	ENSMUST00000131228	Pkig	chr2:163658480-163725518+
chr15	81020752	81021120	diffreps_peak_63594	0.261966	368	ENSMUST00000145779	Mkl1	1.30117	0.547059	1	up	Ensembl	627	chr15:81020238-81021302-	exon sense-overlapping	ENSMUST00000134469	Mkl1	chr15:81012281-81190733-
chr10	41485921	41486200	diffreps_peak_15833	0.34977	279	ENSMUST00000126833	Smpd2	1.41318	0.44692	0.96753	up	Ensembl	4150	chr10:41485642-41490330-	natural antisense	ENSMUST00000119962	Mical1	chr10:41476314-41487032+
chr19	5111137	5111445	diffreps_peak_87568	1.03981	308	ENSMUST00000137403	Klc2	1.43835	0.0912415	0.317645	up	Ensembl	841	chr19:5109427-5111445-	exon sense-overlapping	ENSMUST00000113727	Klc2	chr19:5107748-5118298-
chr18	69681321	69681520	diffreps_peak_85752	0.528732	199	ENSMUST00000146908	Tcf4	1.37935	0.295984	0.749742	up	Ensembl	3693	chr18:69679699-69684528+	exon sense-overlapping	ENSMUST00000078486	Tcf4	chr18:69345721-69687967+
chr4	151979201	151979580	diffreps_peak_128990	0.55434	379	ENSMUST00000128582	Dnajc11	1.42897	0.279036	0.721653	up	Ensembl	5607	chr4:151933739-151981218+	exon sense-overlapping	ENSMUST00000147625	Dnajc11	chr4:151946332-151968616+
chr11	60704641	60704750	diffreps_peak_27656	1.21284	109	ENSMUST00000128749	Llgl1	2.55203	0.0612579	0.229326	up	Ensembl	788	chr11:60704197-60706069+	exon sense-overlapping	NM_008502	Llgl1	chr11:60699690-60714188+
chr2	130882201	130882330	diffreps_peak_101927	7.55782	129	uc008mkb.2	A730017L22Rik	57.8143	2.76806e-08	4.66005e-07	up	UCSC_knowngene	3095	chr2:130879699-130906396-	exon sense-overlapping	ENSMUST00000146975	4930402H24Rik	chr2:130812866-130906406-
chr13	78236421	78236564	diffreps_peak_48457	7.64103	143	NR_045195	A830082K12Rik	56.6	2.28545e-08	4.10032e-07	up	RefSeq	2305	chr13:78198017-78236564+	natural antisense	ENSMUST00000091458	Nr2f1	chr13:78188973-78199757-
chr14	49713245	49713400	diffreps_peak_53640	0.897495	155	ENSMUST00000115992	Gm16082	2.92328	0.126621	0.406724	up	Ensembl	377	chr14:49713246-49713622-	intron sense-overlapping	ENSMUST00000118129	3632451O06Rik	chr14:49681668-49783371-
chr8	111154321	111154540	diffreps_peak_176802	0.0792793	219	uc029wwc.1	DQ685217	1.03694	0.833145	1	up	UCSC_knowngene	1721	chr8:111153313-111155033-	exon sense-overlapping	ENSMUST00000169020	Glg1	chr8:111154421-111259216-
chr11	30954101	30954335	diffreps_peak_25351	8.11755	234	ENSMUST00000152770	Erlec1	56.3889	7.62875e-09	2.25818e-07	up	Ensembl	532	chr11:30953007-30954335-	exon sense-overlapping	NM_025745	Erlec1	chr11:30929784-30954131-
chr11	115588855	115589160	diffreps_peak_34278	1.16546	305	ENSMUST00000154832	Gga3	1.69335	0.0683195	0.251115	up	Ensembl	4848	chr11:115584364-115589521-	exon sense-overlapping	NM_001252067	Gga3	chr11:115584255-115603916-
chr2	19657761	19657897	diffreps_peak_93302	0.112677	136	NR_033642	Gm3230	1.17951	0.771478	1	up	RefSeq	2092	chr2:19655806-19657897-	bidirectional	NM_027715	Otud1	chr2:19658062-19660590+
chr5	149284141	149284360	diffreps_peak_143492	4.38575	219	uc009apq.1	AK036547	53.7	4.11387e-05	0.000294895	up	UCSC_knowngene	4230	chr5:149282752-149287868-	natural antisense	NM_009663	Alox5ap	chr5:149265058-149288047+
chr11	20830881	20831056	diffreps_peak_24803	0.518151	175	ENSMUST00000154300	Lgalsl	2.21354	0.303283	0.761641	up	Ensembl	483	chr11:20829312-20831056-	exon sense-overlapping	ENSMUST00000047028	Lgalsl	chr11:20823576-20831056-
chrX	73776701	73776900	diffreps_peak_192126	0.638861	199	ENSMUST00000136664	Srpk3	2.69173	0.229688	0.635662	up	Ensembl	2711	chrX:73774405-73778925+	exon sense-overlapping	ENSMUST00000002081	Srpk3	chrX:73774405-73778925+
chr13	67814501	67814740	diffreps_peak_47863	7.8046	239	ENSMUST00000181246	Zfp273	51.4516	1.56819e-08	3.24232e-07	up	Ensembl	1485	chr13:67813812-67815296+	exon sense-overlapping	ENSMUST00000012725	Zfp273	chr13:67813816-67826999+
chr7	63543801	63544020	diffreps_peak_161131	0	219	ENSMUST00000121016	Gm5898	1.00164	1	1	up	Ensembl	2071	chr7:63542479-63544549+	intron sense-overlapping	ENSMUST00000058476	Otud7a	chr7:63444751-63759028+
chr7	14306414	14306440	diffreps_peak_155090	0.154639	26	ENSMUST00000185066	RP23-2C22.1	1.5038	0.700424	1	up	Ensembl	1249	chr7:14306415-14307663+	intergenic
chr2	36210574	36211000	diffreps_peak_95811	7.54063	426	uc008jlk.1	AK142949	50.253	2.87988e-08	4.78979e-07	up	UCSC_knowngene	1979	chr2:36202312-36212902+	intergenic
chr17	6607421	6607720	diffreps_peak_73560	7.32181	299	ENSMUST00000138598	Dynlt1c	47.4011	4.76642e-08	6.78983e-07	up	Ensembl	3250	chr17:6601792-6609774+	exon sense-overlapping	ENSMUST00000092966	Dynlt1c	chr17:6601671-6609679+
chr2	93197461	93197640	diffreps_peak_99428	0.0241144	179	ENSMUST00000140172	Trp53i11	1.01151	0.945988	1	up	Ensembl	1752	chr2:93187561-93200308+	exon sense-overlapping	ENSMUST00000090554	Trp53i11	chr2:93187584-93201749+
chr7	63543961	63544160	diffreps_peak_161136	0.154466	199	ENSMUST00000121016	Gm5898	1.17279	0.700703	1	up	Ensembl	2071	chr7:63542479-63544549+	intron sense-overlapping	NM_130880	Otud7a	chr7:63444772-63759027+
chr15	12575761	12576093	diffreps_peak_58746	0.0704955	332	uc007vhv.1	AK201904	1.39137	0.850167	1	up	UCSC_knowngene	399	chr15:12575695-12576093+	intronic antisense	ENSMUST00000075317	Pdzd2	chr15:12357054-12592556-
chr9	67032219	67032260	diffreps_peak_183975	0.126171	41	ENSMUST00000129466	Tpm1	1.1014	0.747874	1	up	Ensembl	1123	chr9:67032220-67049118-	exon sense-overlapping	ENSMUST00000113687	Tpm1	chr9:67027989-67049143-
chr17	35927921	35928280	diffreps_peak_77008	0.363626	359	ENSMUST00000151375	Ppp1r10	1.48996	0.432886	0.949718	up	Ensembl	719	chr17:35926494-35928329+	exon sense-overlapping	ENSMUST00000087211	Ppp1r10	chr17:35916566-35932272+
chr4	137724641	137724801	diffreps_peak_126908	0.139162	160	ENSMUST00000148054	Rap1gap	1.2173	0.725835	1	up	Ensembl	2317	chr4:137723989-137729861+	exon sense-overlapping	ENSMUST00000141306	Rap1gap	chr4:137718872-137728358+
chr11	115418801	115419020	diffreps_peak_34248	7.58517	219	ENSMUST00000138779	Atp5h	43.797	2.59912e-08	4.45774e-07	up	Ensembl	857	chr11:115416853-115419073-	exon sense-overlapping	NM_027862	Atp5h	chr11:115415697-115419919-
chr13	67755021	67755300	diffreps_peak_47861	0.434621	279	NR_027969	Zfp85os	1.61703	0.367603	0.861956	up	RefSeq	2908	chr13:67729262-67756838+	natural antisense	ENSMUST00000144183	Zfp85-rs1	chr13:67747801-67755228-
chr15	4026601	4026860	diffreps_peak_58281	7.35773	259	NR_028266	BC037032	43.0858	4.388e-08	6.40104e-07	up	RefSeq	4622	chr15:4020111-4027406-	natural antisense	NM_024188	Oxct1	chr15:4026428-4155344+
chr12	108865870	108866299	diffreps_peak_42378	3.71035	429	ENSMUST00000162952	Wars	1.45256	0.000194826	0.0012847	up	Ensembl	698	chr12:108865871-108875281-	exon sense-overlapping	NM_001164314	Wars	chr12:108860030-108894174-
chr15	100704018	100704260	diffreps_peak_65785	0.0636727	242	uc007xsc.1	AK028111	1.05869	0.863629	1	up	UCSC_knowngene	1396	chr15:100695773-100704896+	natural antisense	NM_172451	Galnt6	chr15:100689915-100729376-
chr5	34620044	34620340	diffreps_peak_132562	0.0565162	296	ENSMUST00000144226	Add1	1.04352	0.877978	1	up	Ensembl	698	chr5:34616626-34620451+	exon sense-overlapping	ENSMUST00000114338	Add1	chr5:34573664-34632308+
chr4	41521912	41522220	diffreps_peak_118799	0.491008	308	uc008sjb.1	AK086793	1.27542	0.322844	0.794068	up	UCSC_knowngene	1560	chr4:41520896-41525823+	natural antisense	NM_001159583	Fam219a	chr4:41518929-41569527-
chr3	51240321	51240520	diffreps_peak_109706	0.341234	199	ENSMUST00000144826	Ccrn4l	1.30668	0.455791	0.977738	up	Ensembl	9797	chr3:51240206-51251624+	exon sense-overlapping	ENSMUST00000167780	Ccrn4l	chr3:51224470-51251631+
chr4	148544412	148544540	diffreps_peak_128409	0.270726	128	ENSMUST00000129715	Mtor	1.40622	0.536134	1	up	Ensembl	598	chr4:148544413-148547788+	exon sense-overlapping	ENSMUST00000103221	Mtor	chr4:148448611-148557683+
chr7	45707103	45707280	diffreps_peak_159496	0.0205146	177	ENSMUST00000123587	Dbp	1.03133	0.953862	1	up	Ensembl	1732	chr7:45707104-45710028+	natural antisense	ENSMUST00000107737	Sphk2	chr7:45709467-45718002-
chr19	41950751	41951040	diffreps_peak_90416	0.473747	289	ENSMUST00000166517	Mms19	1.74681	0.335933	0.813481	up	Ensembl	807	chr19:41949727-41951344-	exon sense-overlapping	ENSMUST00000167820	Mms19	chr19:41946980-41953944-
chr3	113630021	113630220	diffreps_peak_114117	0.0521097	199	uc008rbi.1	AK017534	1.01296	0.886932	1	up	UCSC_knowngene	1431	chr3:113629853-113631283+	natural antisense	NM_001287015	Rnpc3	chr3:113605067-113630149-
chr11	84836441	84836535	diffreps_peak_30642	0.0312029	94	ENSMUST00000168267	Ggnbp2	1.00736	0.930673	1	up	Ensembl	385	chr11:84836421-84837984-	exon sense-overlapping	ENSMUST00000168434	Ggnbp2	chr11:84832361-84870817-
chr10	127465130	127465280	diffreps_peak_22870	0.0341549	150	ENSMUST00000163794	R3hdm2	1.01345	0.924368	1	up	Ensembl	395	chr10:127459491-127465312+	exon sense-overlapping	ENSMUST00000105249	R3hdm2	chr10:127444311-127499384+
chr8	13014818	13014940	diffreps_peak_168832	0.0463448	122	ENSMUST00000127229	Mcf2l	1.00915	0.898784	1	up	Ensembl	666	chr8:13013062-13015365+	exon sense-overlapping	ENSMUST00000134227	Mcf2l	chr8:13011510-13018094+
chr6	54177479	54177683	diffreps_peak_146885	0.19598	204	ENSMUST00000112504	Gm15526	1.27828	0.636825	1	up	Ensembl	204	chr6:54177480-54177683-	intronic antisense	ENSMUST00000046856	Chn2	chr6:54039573-54300721+
chr19	6049981	6050091	diffreps_peak_87924	1.09472	110	ENSMUST00000142101	Syvn1	1.89779	0.0804036	0.287108	up	Ensembl	4080	chr19:6047065-6053711+	exon sense-overlapping	NM_028769	Syvn1	chr19:6046576-6053718+
chr8	3393005	3393102	diffreps_peak_167885	7.58444	97	ENSMUST00000131773	Arhgef18	42.7471	2.60354e-08	4.46281e-07	up	Ensembl	3843	chr8:3393006-3450640+	exon sense-overlapping	ENSMUST00000145394	Arhgef18	chr8:3393073-3429639+
chr1	4976741	4976820	diffreps_peak_129	13.9861	79	ENSMUST00000144339	Gm16041	39.4571	1.03264e-14	8.43269e-11	up	Ensembl	3725	chr1:4970857-4976820+	intronic antisense	ENSMUST00000002533	Rgs20	chr1:4909576-5019539-
chr10	82756701	82756840	diffreps_peak_19953	1.45997	139	ENSMUST00000128397	Nfyb	1.23685	0.0346761	0.1426	up	Ensembl	634	chr10:82755068-82757307-	exon sense-overlapping	ENSMUST00000130911	Nfyb	chr10:82748701-82764144-
chr14	55510961	55511440	diffreps_peak_54243	0.811537	479	ENSMUST00000170155	Cpne6	1.87362	0.154334	0.473786	up	Ensembl	4000	chr14:55510475-55517430+	exon sense-overlapping	NM_009947	Cpne6	chr14:55511360-55517431+
chr6	38718834	38719042	diffreps_peak_145829	0.550877	208	uc009bla.1	AK076827	1.25632	0.281269	0.725538	up	UCSC_knowngene	874	chr6:38718835-38742700+	natural antisense	ENSMUST00000160962	Hipk2	chr6:38697880-38837224-
chr7	44336015	44336100	diffreps_peak_158701	0.108987	85	ENSMUST00000134470	Shank1	1.23634	0.77806	1	up	Ensembl	608	chr7:44336016-44343738+	exon sense-overlapping	ENSMUST00000107938	Shank1	chr7:44310253-44358351+
chr15	98650221	98650800	diffreps_peak_65306	0.253968	579	ENSMUST00000159423	Ddx23	1.38011	0.557227	1	up	Ensembl	3411	chr15:98648003-98662881-	exon sense-overlapping	ENSMUST00000162384	Ddx23	chr15:98656679-98662858-
chr11	120718901	120719132	diffreps_peak_35592	0.139447	231	ENSMUST00000150225	Lrrc45	1.24528	0.725359	1	up	Ensembl	1139	chr11:120717515-120719972+	exon sense-overlapping	NM_153545	Lrrc45	chr11:120713953-120721127+
chr10	77615901	77616060	diffreps_peak_18513	0.153157	159	ENSMUST00000174295	Sumo3	1.12017	0.702818	1	up	Ensembl	516	chr10:77615133-77616060+	intron sense-overlapping	ENSMUST00000124024	Sumo3	chr10:77613709-77616748+
chr7	3655821	3656156	diffreps_peak_154034	0.805961	335	ENSMUST00000143085	Cnot3	1.43949	0.156329	0.478463	up	Ensembl	2963	chr7:3645290-3661108+	exon sense-overlapping	ENSMUST00000038913	Cnot3	chr7:3645352-3661100+
chr14	54645604	54645940	diffreps_peak_53956	0.454223	336	ENSMUST00000133706	Acin1	1.21296	0.35138	0.837901	up	Ensembl	803	chr14:54644997-54646047-	exon sense-overlapping	ENSMUST00000022793	Acin1	chr14:54642161-54686931-
chr9	75193772	75193920	diffreps_peak_184667	0.0654749	148	ENSMUST00000153404	Myo5a	1.02069	0.860053	1	up	Ensembl	651	chr9:75193773-75203752+	exon sense-overlapping	ENSMUST00000130384	Myo5a	chr9:75185996-75201319+
chr1	85276641	85276840	diffreps_peak_5661	0.78014	199	ENSMUST00000163068	Gm16026	3.25405	0.165905	0.500376	up	Ensembl	2741	chr1:85266698-85277814+	intronic antisense	ENSMUST00000093506	C130026I21Rik	chr1:85246344-85270543-
chr8	71490681	71491020	diffreps_peak_173630	0.795267	339	ENSMUST00000124349	Gtpbp3	2.93248	0.160226	0.487494	up	Ensembl	2830	chr8:71488743-71493400+	exon sense-overlapping	NM_032544	Gtpbp3	chr8:71488103-71493400+
chr7	24919201	24919776	diffreps_peak_156425	0.491647	575	ENSMUST00000129928	Arhgef1	1.43654	0.322369	0.793274	up	Ensembl	777	chr7:24919202-24922379+	exon sense-overlapping	NM_001130150	Arhgef1	chr7:24902986-24926591+
chr2	30346341	30346453	diffreps_peak_94886	0.0706835	112	ENSMUST00000142720	Sh3glb2	1.02291	0.8498	1	up	Ensembl	943	chr2:30346108-30347587-	exon sense-overlapping	NM_139302	Sh3glb2	chr2:30344777-30359316-
chr16	32644341	32644391	diffreps_peak_68864	0.00536827	50	ENSMUST00000124585	Tnk2	1.02359	0.987715	1	up	Ensembl	471	chr16:32644291-32663888+	exon sense-overlapping	NM_001110147	Tnk2	chr16:32644643-32683493+
chr8	70531123	70531273	diffreps_peak_173313	0.926123	150	ENSMUST00000125741	Fkbp8	1.65696	0.118543	0.38948	up	Ensembl	599	chr8:70531124-70534171+	exon sense-overlapping	ENSMUST00000119353	Fkbp8	chr8:70527724-70535328+
chr2	166952241	166952440	diffreps_peak_105215	0.0156175	199	ENSMUST00000142481	Stau1	1.00337	0.964678	1	up	Ensembl	3573	chr2:166948147-166955384-	exon sense-overlapping	ENSMUST00000109235	Stau1	chr2:166947549-166996278-
chr3	65394741	65395100	diffreps_peak_110557	0.153899	359	ENSMUST00000131852	Gm5540	1.2601	0.701618	1	up	Ensembl	1848	chr3:65393337-65395184+	bidirectional	uc008pkn.1	Ssr3	chr3:65379657-65392553-
chr14	66158561	66158760	diffreps_peak_54894	0.0512711	199	ENSMUST00000136216	Ptk2b	1.00814	0.888646	1	up	Ensembl	3478	chr14:66153267-66160678-	exon sense-overlapping	ENSMUST00000022622	Ptk2b	chr14:66153257-66281052-
chr10	80138220	80138460	diffreps_peak_18958	0.40739	240	ENSMUST00000138776	Dos	1.50331	0.39139	0.895195	up	Ensembl	437	chr10:80137347-80138616-	exon sense-overlapping	NM_001195268	Dos	chr10:80130434-80137387-
chr14	18597090	18597120	diffreps_peak_51412	0.00447851	30	ENSMUST00000176672	Ube2e2	1.01206	0.989741	1	up	Ensembl	328	chr14:18574363-18597241-	exon sense-overlapping	NM_144839	Ube2e2	chr14:18573577-18893627-
chr1	118459081	118459265	diffreps_peak_7806	1.03991	184	NR_027901	2900060B14Rik	1.84836	0.0912207	0.317627	up	RefSeq	597	chr1:118458669-118459265-	intronic antisense	ENSMUST00000049404	Clasp1	chr1:118389058-118609432+
chr15	78437121	78437734	diffreps_peak_62936	2.5095	613	ENSMUST00000160916	Kctd17	1.15991	0.00309383	0.0167375	up	Ensembl	1146	chr15:78432987-78437734+	exon sense-overlapping	ENSMUST00000162808	Kctd17	chr15:78430086-78438580+
chr3	89715331	89715538	diffreps_peak_112144	7.72828	207	ENSMUST00000123691	Adar	39.3333	1.86946e-08	3.60829e-07	up	Ensembl	519	chr3:89715332-89735153+	exon sense-overlapping	NM_001038587	Adar	chr3:89715022-89753455+
chr4	144588261	144588500	diffreps_peak_128007	7.75094	239	ENSMUST00000118978	Gm13127	39.1714	1.77442e-08	3.4944e-07	up	Ensembl	1389	chr4:144587244-144588632+	intergenic
chr14	52003641	52003840	diffreps_peak_53779	0.03811	199	ENSMUST00000182931	Arhgef40	1.02751	0.915988	1	up	Ensembl	820	chr14:52003571-52005021+	exon sense-overlapping	ENSMUST00000182061	Arhgef40	chr14:51984931-52005623+
chr11	59208481	59208695	diffreps_peak_27438	0.625814	214	ENSMUST00000101158	Gm10434	1.33966	0.236693	0.649529	up	Ensembl	471	chr11:59208246-59208720-	natural antisense	NM_024210	2310033P09Rik	chr11:59208361-59210734+
chr2	166952961	166953340	diffreps_peak_105219	0.00662209	379	ENSMUST00000130790	Stau1	1.02138	0.984868	1	up	Ensembl	788	chr2:166952907-166963441-	exon sense-overlapping	ENSMUST00000109236	Stau1	chr2:166948273-166996299-
chr10	81470628	81470807	diffreps_peak_19755	0.210359	179	ENSMUST00000145375	Celf5	1.179	0.616085	1	up	Ensembl	605	chr10:81467015-81470807-	exon sense-overlapping	ENSMUST00000120508	Celf5	chr10:81461548-81482684-
chr5	137606781	137606980	diffreps_peak_142085	7.84998	199	ENSMUST00000128755	Pcolce	38.5435	1.41262e-08	3.03924e-07	up	Ensembl	2573	chr5:137605103-137611408-	exon sense-overlapping	ENSMUST00000155251	Pcolce	chr5:137607510-137613762-
chr6	124728547	124728680	diffreps_peak_152230	8.40103	133	ENSMUST00000172613	Ptpn6	38.3097	3.97163e-09	1.60662e-07	up	Ensembl	421	chr6:124727747-124728708-	exon sense-overlapping	ENSMUST00000171549	Ptpn6	chr6:124720707-124738714-
chr5	145122531	145122660	diffreps_peak_143116	7.55596	129	ENSMUST00000129033	Arpc1b	38.2347	2.77998e-08	4.67145e-07	up	Ensembl	431	chr5:145114258-145122795+	exon sense-overlapping	ENSMUST00000141602	Arpc1b	chr5:145114316-145122635+
chr2	29901081	29901420	diffreps_peak_94738	0.775371	339	ENSMUST00000153216	Odf2	1.53789	0.167737	0.504709	up	Ensembl	828	chr2:29889825-29901493+	exon sense-overlapping	ENSMUST00000113763	Odf2	chr2:29889785-29922539+
chr11	86238464	86238620	diffreps_peak_30715	0.316952	156	ENSMUST00000127745	Ints2	1.255	0.482001	1	up	Ensembl	3181	chr11:86235612-86238883-	exon sense-overlapping	ENSMUST00000018212	Ints2	chr11:86210681-86257550-
chr7	13332645	13332820	diffreps_peak_154993	1.10855	175	ENSMUST00000092523	Gm10712	2.47287	0.0778847	0.279728	up	Ensembl	612	chr7:13332646-13333257-	intronic antisense	NM_001004762	Pla2g4c	chr7:13329322-13360668+
chr9	80286281	80286480	diffreps_peak_184966	0.0992232	199	ENSMUST00000156199	Myo6	1.01844	0.79575	1	up	Ensembl	635	chr9:80285414-80286508+	exon sense-overlapping	ENSMUST00000113266	Myo6	chr9:80217629-80311729+
chr8	124374245	124374460	diffreps_peak_178175	0.720434	215	ENSMUST00000140126	Pgbd5	1.28106	0.190356	0.554469	up	Ensembl	939	chr8:124371885-124375111-	exon sense-overlapping	NM_171824	Pgbd5	chr8:124369049-124433936-
chr2	166954899	166955260	diffreps_peak_105221	4.74745	361	ENSMUST00000142481	Stau1	1.36337	1.78874e-05	0.000133899	up	Ensembl	3573	chr2:166948147-166955384-	exon sense-overlapping	NM_001291160	Stau1	chr2:166947549-166996299-
chr5	121811501	121811700	diffreps_peak_139592	0.466505	199	ENSMUST00000161433	Atxn2	1.21342	0.341582	0.822557	up	Ensembl	578	chr5:121810965-121811930+	exon sense-overlapping	NM_009125	Atxn2	chr5:121711609-121814950+
chr11	50202881	50203118	diffreps_peak_26582	0.0780947	237	ENSMUST00000147846	Sqstm1	1.02741	0.835421	1	up	Ensembl	457	chr11:50202443-50203118-	exon sense-overlapping	ENSMUST00000143379	Sqstm1	chr11:50200611-50210765-
chr11	74649829	74649920	diffreps_peak_29293	1.705	91	ENSMUST00000127679	Cluh	1.47818	0.0197242	0.0878456	up	Ensembl	664	chr11:74649830-74657339+	exon sense-overlapping	ENSMUST00000092915	Cluh	chr11:74649515-74670847+
chr4	40775461	40775700	diffreps_peak_118692	3.76697	239	ENSMUST00000178609	Gm12396	37.9	0.000171012	0.00113613	up	Ensembl	593	chr4:40775133-40775725-	intergenic
chr19	5423781	5424220	diffreps_peak_87701	0.387379	439	ENSMUST00000125468	Drap1	1.17389	0.409847	0.919301	up	Ensembl	939	chr19:5422809-5424220-	exon sense-overlapping	ENSMUST00000113673	Drap1	chr19:5422812-5424543-
chr18	56733242	56733560	diffreps_peak_84866	7.6419	318	uc008eyu.1	AK079263	37.4054	2.28088e-08	4.09481e-07	up	UCSC_knowngene	3391	chr18:56733243-56736633+	exon sense-overlapping	NM_010721	Lmnb1	chr18:56707813-56753424+
chr10	127481501	127481794	diffreps_peak_22881	0.303047	293	ENSMUST00000164469	R3hdm2	1.16763	0.497683	1	up	Ensembl	763	chr10:127481314-127484544+	exon sense-overlapping	ENSMUST00000170336	R3hdm2	chr10:127421124-127499031+
chr7	126808869	126809060	diffreps_peak_166100	7.62069	191	ENSMUST00000153686	Gm15676	36.9398	2.39502e-08	4.234e-07	up	Ensembl	799	chr7:126800790-126809108-	intergenic
chr6	145251281	145251580	diffreps_peak_153598	0.499868	299	NR_045598	Gm15706	2.54775	0.316324	0.78327	up	RefSeq	886	chr6:145250552-145251856+	bidirectional	ENSMUST00000155145	Kras	chr6:145246704-145250202-
chr5	113279132	113279336	diffreps_peak_138103	1.11239	204	ENSMUST00000156340	Sgsm1	2.24553	0.0771987	0.277663	up	Ensembl	490	chr5:113275887-113279336-	exon sense-overlapping	ENSMUST00000112325	Sgsm1	chr5:113265674-113310739-
chr1	13150689	13151018	diffreps_peak_727	0.794072	329	ENSMUST00000133232	Ncoa2	1.32324	0.160668	0.488489	up	Ensembl	594	chr1:13148429-13151018-	exon sense-overlapping	NM_001077695	Ncoa2	chr1:13139159-13374083-
chr8	84695201	84695337	diffreps_peak_174956	1.4641	136	ENSMUST00000148118	Trmt1	1.66366	0.034348	0.14143	up	Ensembl	846	chr8:84694922-84697435+	exon sense-overlapping	NM_001164559	Trmt1	chr8:84689247-84699808+
chr19	6152714	6152940	diffreps_peak_87951	3.08311	226	ENSMUST00000117826	Gm5510	36.1	0.000825836	0.00496008	up	Ensembl	486	chr19:6152715-6153200+	intergenic
chr8	84913481	84913528	diffreps_peak_175059	0.566977	47	NR_103491	LOC100503676	1.18252	0.271034	0.707161	up	RefSeq	1174	chr8:84913335-84922915+	intronic antisense	ENSMUST00000119820	Mast1	chr8:84911908-84937359-
chr11	98798901	98799233	diffreps_peak_32239	0.173647	332	NR_033551	Gm12359	1.06592	0.670429	1	up	RefSeq	1401	chr11:98798309-98810089-	natural antisense	NM_138660	Casc3	chr11:98809808-98833807+
chr14	6251761	6251880	diffreps_peak_50638	8.0264	119	ENSMUST00000169213	Gm21772	35.9444	9.41032e-09	2.47172e-07	up	Ensembl	478	chr14:6251403-6251880+	intronic antisense	ENSMUST00000096172	Gm3411	chr14:6090977-6266620-
chr15	98652601	98652981	diffreps_peak_65309	1.28123	380	ENSMUST00000159423	Ddx23	1.46488	0.0523324	0.202318	up	Ensembl	3411	chr15:98648003-98662881-	exon sense-overlapping	ENSMUST00000003450	Ddx23	chr15:98645134-98662889-
chr7	110426321	110426560	diffreps_peak_164726	0.218741	239	ENSMUST00000167880	Sbf2	1.568	0.604308	1	up	Ensembl	4280	chr7:110425626-110614882-	exon sense-overlapping	ENSMUST00000171218	Sbf2	chr7:110441287-110614905-
chr8	122650321	122650476	diffreps_peak_177860	0.556072	155	ENSMUST00000148630	Cbfa2t3	1.6117	0.277925	0.719617	up	Ensembl	537	chr8:122650028-122698902-	exon sense-overlapping	ENSMUST00000006525	Cbfa2t3	chr8:122629463-122678072-
chr17	34911521	34911665	diffreps_peak_76725	0.012807	144	ENSMUST00000124002	Ehmt2	1.02071	0.970941	1	up	Ensembl	1359	chr17:34910975-34914052+	exon sense-overlapping	ENSMUST00000078061	Ehmt2	chr17:34898499-34914047+
chr8	70769347	70769664	diffreps_peak_173381	0.0437814	317	ENSMUST00000146707	Pik3r2	1.0201	0.904104	1	up	Ensembl	746	chr8:70768640-70769664-	exon sense-overlapping	NM_008841	Pik3r2	chr8:70768181-70776712-
chr4	126167101	126167420	diffreps_peak_125269	0.154381	319	ENSMUST00000154702	Thrap3	1.0843	0.700841	1	up	Ensembl	609	chr4:126165555-126167476-	exon sense-overlapping	ENSMUST00000080919	Thrap3	chr4:126164082-126202760-
chr2	92390821	92391141	diffreps_peak_99310	0.0739006	320	ENSMUST00000149653	Mapk8ip1	1.11673	0.843528	1	up	Ensembl	1816	chr2:92389902-92392732-	exon sense-overlapping	ENSMUST00000050312	Mapk8ip1	chr2:92383680-92401263-
chr8	72255901	72256260	diffreps_peak_173811	0.543652	359	ENSMUST00000156735	Ap1m1	1.95715	0.285988	0.73386	up	Ensembl	1066	chr8:72252855-72256408+	exon sense-overlapping	ENSMUST00000003117	Ap1m1	chr8:72240018-72257385+
chr11	94297821	94298180	diffreps_peak_31340	0.0785373	359	ENSMUST00000171033	Luc7l3	1.04126	0.83457	1	up	Ensembl	621	chr11:94297007-94298218-	exon sense-overlapping	ENSMUST00000132623	Luc7l3	chr11:94291061-94297067-
chr10	69706295	69706540	diffreps_peak_17535	1.13685	245	ENSMUST00000182142	Ank3	2.5679	0.0729713	0.265156	up	Ensembl	4181	chr10:69706296-69710476+	intron sense-overlapping	ENSMUST00000092434	Ank3	chr10:69534222-70015633+
chr5	100363376	100363720	diffreps_peak_136748	0.0545748	344	ENSMUST00000182569	Sec31a	1.2069	0.881912	1	up	Ensembl	1686	chr5:100361649-100378913-	exon sense-overlapping	ENSMUST00000094578	Sec31a	chr5:100361649-100416234-
chr17	34114381	34114650	diffreps_peak_76571	0.360503	269	ENSMUST00000173204	Brd2	1.26896	0.436011	0.953711	up	Ensembl	771	chr17:34113796-34115076-	exon sense-overlapping	NM_010238	Brd2	chr17:34112019-34121747-
chr11	102399194	102399360	diffreps_peak_32919	0.0809892	166	ENSMUST00000128331	Rundc3a	1.05194	0.829871	1	up	Ensembl	635	chr11:102398119-102399779+	exon sense-overlapping	ENSMUST00000006750	Rundc3a	chr11:102393403-102402555+
chr11	75598179	75598400	diffreps_peak_29491	0.729868	221	ENSMUST00000140841	Pitpna	1.33596	0.186265	0.545681	up	Ensembl	594	chr11:75588159-75598548+	exon sense-overlapping	ENSMUST00000179521	Pitpna	chr11:75588108-75628778+
chr16	95016381	95016620	diffreps_peak_72985	0.10478	239	ENSMUST00000181507	Gm7976	1.35417	0.785633	1	up	Ensembl	1242	chr16:95016370-95067017+	intergenic
chr4	107040101	107040300	diffreps_peak_123659	0.681189	199	ENSMUST00000156288	Ssbp3	1.82472	0.208358	0.592425	up	Ensembl	775	chr4:107038233-107040657+	exon sense-overlapping	ENSMUST00000072753	Ssbp3	chr4:106911533-107048567+
chr4	155630193	155630340	diffreps_peak_129557	5.09785	147	ENSMUST00000135550	Cdk11b	1.33933	7.98272e-06	6.24905e-05	up	Ensembl	805	chr4:155624854-155630340+	exon sense-overlapping	ENSMUST00000105600	Cdk11b	chr4:155624883-155649938+
chr15	98658201	98658435	diffreps_peak_65315	0.0978955	234	ENSMUST00000159170	Ddx23	1.04067	0.798187	1	up	Ensembl	610	chr15:98657893-98662889-	exon sense-overlapping	ENSMUST00000162384	Ddx23	chr15:98656679-98662858-
chr11	72051840	72052049	diffreps_peak_29085	0.486784	209	ENSMUST00000134210	Pitpnm3	1.59591	0.325999	0.798246	up	Ensembl	461	chr11:72051109-72052049-	exon sense-overlapping	NM_001081641	Pitpnm3	chr11:72047528-72135889-
chr14	55513051	55513246	diffreps_peak_54249	0.374432	195	ENSMUST00000165725	Cpne6	1.4712	0.422249	0.935807	up	Ensembl	794	chr14:55510597-55513692+	exon sense-overlapping	NM_009947	Cpne6	chr14:55511360-55517431+
chr10	63023561	63023780	diffreps_peak_17219	0.07276	219	uc007fjq.3	AK156477	1.1098	0.845746	1	up	UCSC_knowngene	1294	chr10:63022545-63023838-	exon sense-overlapping	ENSMUST00000020263	Hnrnph3	chr10:63014664-63023894-
chr3	88909921	88910420	diffreps_peak_111938	0.494551	499	ENSMUST00000147828	Msto1	1.58759	0.32022	0.789637	up	Ensembl	3891	chr3:88909644-88913903-	natural antisense	ENSMUST00000107498	Gon4l	chr3:88835231-88910103+
chr11	3352681	3352817	diffreps_peak_23522	7.79406	136	ENSMUST00000148771	Limk2	35.6452	1.60673e-08	3.2964e-07	up	Ensembl	716	chr11:3350392-3352817-	exon sense-overlapping	ENSMUST00000110029	Limk2	chr11:3344256-3356141-
chr19	6122181	6122287	diffreps_peak_87945	0.657617	106	ENSMUST00000150718	Snx15	1.86775	0.21998	0.616495	up	Ensembl	427	chr19:6121492-6122287-	exon sense-overlapping	ENSMUST00000138931	Snx15	chr19:6121927-6128165-
chr18	34939121	34939437	diffreps_peak_83432	0.181262	316	ENSMUST00000172829	Hspa9	1.19112	0.658776	1	up	Ensembl	883	chr18:34938696-34940862-	exon sense-overlapping	NM_010481	Hspa9	chr18:34937415-34954351-
chr7	122159061	122159401	diffreps_peak_165465	1.09309	340	ENSMUST00000132811	Gm15489	2.2535	0.0807068	0.288002	up	Ensembl	973	chr7:122139008-122159401-	intronic antisense	ENSMUST00000033156	Dctn5	chr7:122133041-122149044+
chr4	155820241	155820428	diffreps_peak_129629	0.49748	187	uc008wex.1	Ccnl2	1.39133	0.318068	0.78611	up	UCSC_knowngene	4232	chr4:155812489-155824543+	exon sense-overlapping	ENSMUST00000030944	Ccnl2	chr4:155812489-155824543+
chr8	20269901	20270120	diffreps_peak_169664	7.47977	219	NR_030708	6820431F20Rik	34.4286	3.31307e-08	5.25986e-07	up	RefSeq	4659	chr8:20268286-20297432-	intergenic
chr6	125035761	125036020	diffreps_peak_152394	12.0861	259	ENSMUST00000132863	Zfp384	33.4386	8.20143e-13	6.1444e-10	up	Ensembl	1861	chr6:125009145-125036180+	exon sense-overlapping	NM_175557	Zfp384	chr6:125009669-125037870+
chr16	96082701	96082718	diffreps_peak_73028	7.65481	17	ENSMUST00000143671	1700093J21Rik	31.7975	2.21405e-08	4.01486e-07	up	Ensembl	648	chr16:96082676-96089070+	bidirectional	ENSMUST00000023631	Brwd1	chr16:95992449-96082447-
chr4	132533021	132533387	diffreps_peak_126189	2.90331	366	ENSMUST00000145795	Atpif1	1.11944	0.00124938	0.00727802	up	Ensembl	1014	chr4:132532488-132533595-	exon sense-overlapping	ENSMUST00000067496	Atpif1	chr4:132530555-132533659-
chr6	124701418	124701560	diffreps_peak_152217	7.47427	142	ENSMUST00000141546	Lpcat3	31.6434	3.35527e-08	5.30315e-07	up	Ensembl	448	chr6:124701419-124702613+	exon sense-overlapping	NM_145130	Lpcat3	chr6:124663104-124704716+
chr9	72672041	72672148	diffreps_peak_184500	0.792305	107	ENSMUST00000184737	Nedd4	1.85792	0.161323	0.489996	up	Ensembl	1260	chr9:72662438-72672148+	exon sense-overlapping	ENSMUST00000184450	Nedd4	chr9:72662482-72720790+
chr8	121782161	121782560	diffreps_peak_177685	0.47977	399	ENSMUST00000172209	Jph3	1.21931	0.331307	0.806663	up	Ensembl	679	chr8:121753476-121782570+	exon sense-overlapping	NM_020605	Jph3	chr8:121730559-121791083+
chr2	36230555	36230763	diffreps_peak_95812	7.43272	208	ENSMUST00000144319	Ptgs1	30.4773	3.69218e-08	5.67314e-07	up	Ensembl	573	chr2:36230556-36238063+	exon sense-overlapping	ENSMUST00000062069	Ptgs1	chr2:36230426-36252272+
chr5	21763361	21763515	diffreps_peak_131120	0.267892	154	ENSMUST00000132962	Dnajc2	1.47365	0.539645	1	up	Ensembl	3758	chr5:21757281-21785170-	exon sense-overlapping	ENSMUST00000115193	Dnajc2	chr5:21757272-21785184-
chr3	88910661	88910860	diffreps_peak_111939	0.118577	199	ENSMUST00000137243	Msto1	1.15857	0.761067	1	up	Ensembl	2636	chr3:88908627-88912074-	exon sense-overlapping	ENSMUST00000126245	Msto1	chr3:88909615-88913999-
chr9	80306913	80307160	diffreps_peak_184986	0.34036	247	ENSMUST00000138650	Myo6	1.50806	0.456709	0.978978	up	Ensembl	1196	chr9:80306914-80308602+	exon sense-overlapping	ENSMUST00000076140	Myo6	chr9:80217637-80311729+
chr7	122969861	122970240	diffreps_peak_165617	0.280914	379	NR_045614	4930413G21Rik	1.19928	0.523704	1	up	RefSeq	1402	chr7:122969058-122970459-	natural antisense	ENSMUST00000148880	Rbbp6	chr7:122965686-122976008+
chr11	74905481	74905780	diffreps_peak_29372	0.494062	299	uc007kcq.1	Srr	1.27948	0.320581	0.790243	up	UCSC_knowngene	2122	chr11:74904028-74909205-	exon sense-overlapping	NM_001163311	Srr	chr11:74906359-74925798-
chr18	82693001	82693200	diffreps_peak_86692	0.0436669	199	ENSMUST00000181931	Gm10524	1.01865	0.904343	1	up	Ensembl	1984	chr18:82692949-82706174+	bidirectional	uc008fub.2	Zfp236	chr18:82593597-82692734-
chr4	108047589	108047680	diffreps_peak_123712	0.507969	91	ENSMUST00000145721	Scp2	1.34265	0.310478	0.773689	up	Ensembl	868	chr4:108044268-108047879-	exon sense-overlapping	ENSMUST00000106701	Scp2	chr4:108044550-108071419-
chr11	59809241	59809485	diffreps_peak_27532	7.57782	244	ENSMUST00000151453	Flcn	30.3867	2.6435e-08	4.51206e-07	up	Ensembl	510	chr11:59809028-59809711-	intron sense-overlapping	ENSMUST00000091246	Flcn	chr11:59791790-59809588-
chr12	4655793	4655888	diffreps_peak_36058	0.0143706	95	uc007mxz.1	AK040557	1.00463	0.967452	1	up	UCSC_knowngene	3343	chr12:4639013-4655888-	natural antisense	NM_011365	Itsn2	chr12:4593008-4713952+
chr10	81314991	81315160	diffreps_peak_19609	0.472285	169	ENSMUST00000159895	Pip5k1c	1.91416	0.337066	0.815172	up	Ensembl	897	chr10:81313988-81315782+	exon sense-overlapping	ENSMUST00000105327	Pip5k1c	chr10:81292980-81318254+
chr15	102634981	102635160	diffreps_peak_66101	0.244848	179	ENSMUST00000142604	Rpl39-ps	1.51713	0.569052	1	up	Ensembl	355	chr15:102634982-102635336+	intergenic
chr5	135733281	135733480	diffreps_peak_141654	0.0703071	199	ENSMUST00000132084	Por	1.02898	0.850536	1	up	Ensembl	674	chr5:135733181-135734047+	exon sense-overlapping	ENSMUST00000122113	Por	chr5:135689158-135735326+
chr15	93234621	93234700	diffreps_peak_64908	7.59189	79	ENSMUST00000083977	Gm24447	28.775	2.55925e-08	4.41469e-07	up	Ensembl	338	chr15:93234363-93234700+	intergenic
chrX	103014141	103014340	diffreps_peak_193893	0.136967	199	ENSMUST00000124538	Pabpc1l2b-ps	1.0465	0.729514	1	up	Ensembl	690	chrX:103013698-103014387+	intergenic
chr15	86133601	86133759	diffreps_peak_64283	7.47471	158	ENSMUST00000123349	Gramd4	28.3993	3.35191e-08	5.30042e-07	up	Ensembl	4861	chr15:86058872-86137631+	exon sense-overlapping	NM_172611	Gramd4	chr15:86057695-86137636+
chr3	79648861	79649160	diffreps_peak_111367	0.81203	299	ENSMUST00000182491	Rxfp1	2.89192	0.154159	0.473355	up	Ensembl	4983	chr3:79644112-79737880-	exon sense-overlapping	ENSMUST00000183040	Rxfp1	chr3:79655293-79667853-
chr2	181586298	181586403	diffreps_peak_106748	1.23274	105	ENSMUST00000155947	Znf512b	2.07534	0.0585142	0.221274	up	Ensembl	688	chr2:181584590-181586403-	exon sense-overlapping	ENSMUST00000108789	Znf512b	chr2:181582103-181592803-
chr3	65394521	65394920	diffreps_peak_110556	7.93679	399	ENSMUST00000131852	Gm5540	27.5161	1.15668e-08	2.80147e-07	up	Ensembl	1848	chr3:65393337-65395184+	bidirectional	ENSMUST00000119896	Ssr3	chr3:65382030-65392553-
chr15	61288561	61288670	diffreps_peak_61489	2.3236	109	uc011ztg.2	EU234017	25.9	0.0047468	0.0246882	up	UCSC_knowngene	917	chr15:61288441-61393820+	intergenic
chr15	64123671	64123806	diffreps_peak_61580	3.20775	135	ENSMUST00000177475	Asap1	1.36141	0.000619798	0.00380171	up	Ensembl	339	chr15:64120091-64123806-	exon sense-overlapping	ENSMUST00000176014	Asap1	chr15:64089447-64349886-
chr17	35529381	35529433	diffreps_peak_76893	7.28	52	ENSMUST00000172893	Cchcr1	25.5759	5.24808e-08	7.29237e-07	up	Ensembl	464	chr17:35528892-35529433+	exon sense-overlapping	ENSMUST00000045956	Cchcr1	chr17:35517176-35531015+
chr10	81580256	81580820	diffreps_peak_19840	1.17322	564	ENSMUST00000129798	Tle2	1.87049	0.0671091	0.247399	up	Ensembl	4388	chr10:81575260-81590470+	exon sense-overlapping	NM_001252401	Tle2	chr10:81575287-81590473+
chr2	32331561	32331940	diffreps_peak_95318	0.309019	379	uc008jfe.2	AK028782	1.32368	0.490887	1	up	UCSC_knowngene	3031	chr2:32329583-32332613-	intron sense-overlapping	NM_010065	Dnm1	chr2:32308471-32353329-
chr12	100948241	100948460	diffreps_peak_41745	0.213709	219	ENSMUST00000180617	A630072L19Rik	1.62696	0.611351	1	up	Ensembl	3405	chr12:100941742-100949875+	natural antisense	NM_026681	Ccdc88c	chr12:100912700-101028983-
chr12	4655793	4655820	diffreps_peak_36056	0.258408	27	uc007mxz.1	AK040557	1.07762	0.551559	1	up	UCSC_knowngene	3343	chr12:4639013-4655888-	natural antisense	NM_001198969	Itsn2	chr12:4593008-4641139+
chr10	116473461	116473920	diffreps_peak_22011	0.224342	459	NR_130644	Kcnmb4os2	1.22799	0.596566	1	up	RefSeq	1615	chr10:116473163-116474986+	natural antisense	ENSMUST00000068233	Kcnmb4	chr10:116417861-116473878-
chr10	75049851	75049951	diffreps_peak_18099	7.3714	100	ENSMUST00000151432	Rab36	25.5718	4.25203e-08	6.26612e-07	up	Ensembl	772	chr10:75038223-75050690+	exon sense-overlapping	ENSMUST00000139384	Rab36	chr10:75037322-75050695+
chr15	99314941	99315140	diffreps_peak_65521	0.0131266	199	ENSMUST00000124275	Prpf40b	1.01904	0.970227	1	up	Ensembl	590	chr15:99314868-99315794+	exon sense-overlapping	ENSMUST00000150636	Prpf40b	chr15:99314906-99316813+
chr19	8742261	8742540	diffreps_peak_88457	7.22134	279	ENSMUST00000175642	Stx5a	25.5058	6.00697e-08	8.05921e-07	up	Ensembl	523	chr19:8741470-8742670+	exon sense-overlapping	ENSMUST00000073430	Stx5a	chr19:8741803-8755642+
chr2	6585921	6586108	diffreps_peak_92425	0.573098	187	ENSMUST00000183269	Celf2	1.52164	0.267241	0.702834	up	Ensembl	4798	chr2:6585779-6721615-	exon sense-overlapping	ENSMUST00000182404	Celf2	chr2:6553889-7395893-
chr2	157424115	157424414	diffreps_peak_104177	0.389909	299	ENSMUST00000145715	Src	1.29057	0.407465	0.916282	up	Ensembl	416	chr2:157424116-157455707+	exon sense-overlapping	ENSMUST00000092576	Src	chr2:157424293-157471838+
chr4	41756061	41756157	diffreps_peak_118885	0.445978	96	ENSMUST00000123524	Sigmar1	2.06624	0.358115	0.848336	up	Ensembl	1087	chr4:41754828-41756157-	natural antisense	ENSMUST00000108038	Galt	chr4:41755228-41758695+
chr4	41774061	41774169	diffreps_peak_118894	0.0651204	108	ENSMUST00000130197	Ccl27a	1.26709	0.860755	1	up	Ensembl	657	chr4:41773188-41774169-	exon sense-overlapping	ENSMUST00000108032	Ccl27a	chr4:41773188-41774158-
chr8	120100901	120101072	diffreps_peak_177393	0.037871	171	ENSMUST00000123186	Zdhhc7	1.0044	0.916493	1	up	Ensembl	246	chr8:120092975-120101072-	intronic antisense	ENSMUST00000127664	Gm20388	chr8:119910841-124345722+
chr17	25782881	25783460	diffreps_peak_75228	1.34879	579	ENSMUST00000129917	Haghl	1.9276	0.0447934	0.177318	up	Ensembl	1790	chr17:25782790-25785335-	exon sense-overlapping	NM_001271433	Haghl	chr17:25782787-25785586-
chr5	139342041	139342240	diffreps_peak_142363	0.168147	199	ENSMUST00000152715	Cox19	1.09636	0.678975	1	up	Ensembl	748	chr5:139342016-139345160-	exon sense-overlapping	NM_197980	Cox19	chr5:139337822-139345166-
chr3	89270141	89270525	diffreps_peak_112075	0.978132	384	ENSMUST00000144777	Slc50a1	1.78867	0.105164	0.355973	up	Ensembl	1332	chr3:89268248-89270525-	exon sense-overlapping	NM_009057	Slc50a1	chr3:89268246-89270570-
chr6	34686841	34687120	diffreps_peak_145482	0.0505255	279	ENSMUST00000155714	Cald1	1.31156	0.890173	1	up	Ensembl	1422	chr6:34598544-34687173+	exon sense-overlapping	ENSMUST00000115027	Cald1	chr6:34598564-34775466+
chr9	37422101	37422340	diffreps_peak_181377	0.796994	239	ENSMUST00000171467	Robo3	1.47095	0.15959	0.486034	up	Ensembl	3222	chr9:37416045-37422603-	exon sense-overlapping	ENSMUST00000115038	Robo3	chr9:37416045-37433163-
chr11	97676051	97676205	diffreps_peak_31902	0.62998	154	ENSMUST00000143220	Mllt6	1.42068	0.234434	0.645186	up	Ensembl	641	chr11:97676052-97678370+	exon sense-overlapping	NM_139311	Mllt6	chr11:97663412-97685458+
chr16	32923341	32923600	diffreps_peak_68924	0.0472557	259	ENSMUST00000163830	Gm6611	1.13826	0.896901	1	up	Ensembl	1272	chr16:32923218-32924489+	intron sense-overlapping	ENSMUST00000170201	Lrch3	chr16:32914122-33013143+
chr13	99516727	99516800	diffreps_peak_49516	0.357852	73	uc007rpu.1	AK135852	1.58812	0.43868	0.957277	up	UCSC_knowngene	2382	chr13:99516728-99521760+	bidirectional	NM_008634	Map1b	chr13:99421464-99516602-
chr5	111742848	111742860	diffreps_peak_137851	2.53528	12	ENSMUST00000149538	Gm16019	25.5	0.00291553	0.0158607	up	Ensembl	261	chr5:111742849-111748176+	intergenic
chr5	109933681	109934015	diffreps_peak_137523	0.784138	334	NR_040366	Gm15446	1.67052	0.164385	0.496856	up	RefSeq	1551	chr5:109933563-109941710+	exon sense-overlapping	ENSMUST00000112544	Gm15446	chr5:109923400-109943936+
chr2	180582881	180583100	diffreps_peak_106598	0.0624548	219	ENSMUST00000130277	Mrgbp	1.01307	0.866055	1	up	Ensembl	3150	chr2:180582726-180586304+	exon sense-overlapping	ENSMUST00000029085	Mrgbp	chr2:180582712-180586287+
chr2	120324161	120324289	diffreps_peak_101067	0.990609	128	ENSMUST00000147085	Vps39	2.66892	0.102186	0.347775	up	Ensembl	3379	chr2:120321855-120353109-	exon sense-overlapping	ENSMUST00000028752	Vps39	chr2:120316461-120353125-
chr11	69908095	69908260	diffreps_peak_28712	1.12337	165	ENSMUST00000153041	Neurl4	2.19796	0.0752708	0.271866	up	Ensembl	752	chr11:69907264-69908521+	exon sense-overlapping	NM_001013414	Neurl4	chr11:69901816-69913824+
chr5	107903721	107904120	diffreps_peak_137346	1.52475	399	ENSMUST00000123183	Rpl5	1.45935	0.029871	0.125634	up	Ensembl	854	chr5:107900572-107904123+	exon sense-overlapping	ENSMUST00000082223	Rpl5	chr5:107900502-107909005+
chr5	139274446	139274641	diffreps_peak_142327	2.25385	195	ENSMUST00000123748	Adap1	1.95145	0.00557378	0.0285655	up	Ensembl	643	chr5:139272930-139274641-	exon sense-overlapping	NM_172723	Adap1	chr5:139271876-139325464-
chrX	152046661	152046860	diffreps_peak_196366	0.763014	199	ENSMUST00000131395	Smc1a	1.2611	0.172578	0.515232	up	Ensembl	499	chrX:152046628-152047935+	exon sense-overlapping	ENSMUST00000045312	Smc1a	chrX:152016428-152062694+
chr1	34806314	34806698	diffreps_peak_2298	4.4952	384	ENSMUST00000159059	Arhgef4	1.58885	3.19742e-05	0.000232342	up	Ensembl	1024	chr1:34801722-34806698+	exon sense-overlapping	ENSMUST00000162599	Arhgef4	chr1:34732115-34811829+
chr11	54340441	54340684	diffreps_peak_26996	0.32708	243	ENSMUST00000124047	Gm12224	1.11313	0.470891	0.995489	up	Ensembl	567	chr11:54340369-54353479-	natural antisense	ENSMUST00000108904	Acsl6	chr11:54304202-54361539+
chr11	94092337	94092480	diffreps_peak_31305	0.831094	143	ENSMUST00000138154	Spag9	1.31028	0.147539	0.457422	up	Ensembl	2167	chr11:94071663-94094229+	exon sense-overlapping	ENSMUST00000024979	Spag9	chr11:94044365-94126083+
chrX	151946141	151946367	diffreps_peak_196333	7.68941	226	ENSMUST00000117933	Gm15191	25.2695	2.04453e-08	3.83314e-07	up	Ensembl	1000	chrX:151945368-151946367+	intergenic
chr1	134423957	134424140	diffreps_peak_9084	0.385551	183	ENSMUST00000148822	Adipor1	1.16042	0.411575	0.921605	up	Ensembl	2231	chr1:134415564-134426917+	exon sense-overlapping	ENSMUST00000112237	Adipor1	chr1:134415456-134433348+
chr8	122483101	122483420	diffreps_peak_177832	0.795849	319	ENSMUST00000123671	Piezo1	2.29934	0.160011	0.48699	up	Ensembl	2860	chr8:122481721-122484780-	exon sense-overlapping	ENSMUST00000067252	Piezo1	chr8:122481698-122551329-
chr7	35200241	35200415	diffreps_peak_158176	0.318875	174	ENSMUST00000153163	Lrp3	1.37993	0.479872	1	up	Ensembl	420	chr7:35200027-35202959-	natural antisense	NM_017394	Slc7a10	chr7:35186385-35201111+
chr4	43423590	43423600	diffreps_peak_119584	7.43337	10	ENSMUST00000123447	Rusc2	25.2118	3.68662e-08	5.6674e-07	up	Ensembl	253	chr4:43423591-43424011+	exon sense-overlapping	NM_001037709	Rusc2	chr4:43381982-43427092+
chr16	14068001	14068006	diffreps_peak_67434	7.35747	5	ENSMUST00000119046	Gm15808	25.2095	4.3907e-08	6.40231e-07	up	Ensembl	604	chr16:14067403-14068006+	intron sense-overlapping	NM_144518	2900011O08Rik	chr16:13986637-14101494+
chr8	72138441	72138737	diffreps_peak_173783	1.02627	296	ENSMUST00000181918	Gm26586	1.84336	0.0941294	0.325707	up	Ensembl	1745	chr8:72137389-72140820-	natural antisense	ENSMUST00000003575	Tpm4	chr8:72135259-72153142+
chr1	12668001	12668280	diffreps_peak_695	2.38744	279	NR_045297	Gm17644	25	0.00409787	0.0216067	up	RefSeq	3200	chr1:12667563-12673090+	intergenic
chr10	82763641	82763663	diffreps_peak_19954	7.51795	22	ENSMUST00000127832	Nfyb	24.9398	3.03423e-08	4.94108e-07	up	Ensembl	569	chr10:82752416-82763663-	exon sense-overlapping	ENSMUST00000130911	Nfyb	chr10:82748701-82764144-
chr14	55110181	55110400	diffreps_peak_54175	0.0840404	219	ENSMUST00000132992	Jph4	1.08525	0.824061	1	up	Ensembl	659	chr14:55109642-55110558-	exon sense-overlapping	NM_177049	Jph4	chr14:55106826-55116935-
chr4	149398541	149398785	diffreps_peak_128547	1.25209	244	ENSMUST00000131986	Ube4b	2.07313	0.0559645	0.213309	up	Ensembl	446	chr4:149398512-149399378-	exon sense-overlapping	ENSMUST00000103212	Ube4b	chr4:149328416-149426749-
chrX	169986742	169986800	diffreps_peak_197221	0.170934	58	ENSMUST00000124513	Gm15247	1.10159	0.674631	1	up	Ensembl	403	chrX:169985801-169986939-	natural antisense	NM_010797	Mid1	chrX:169685199-169990797+
chr15	76452901	76453100	diffreps_peak_62525	0.455478	199	uc029ssk.1	AK191694	1.1348	0.350366	0.836524	up	UCSC_knowngene	368	chr15:76452891-76453258-	exon sense-overlapping	NM_013481	Bop1	chr15:76452996-76477269-
chr3	90090009	90090160	diffreps_peak_112251	1.00666	151	ENSMUST00000143281	Tpm3	1.19584	0.0984782	0.337869	up	Ensembl	692	chr3:90089631-90090472+	exon sense-overlapping	ENSMUST00000121503	Tpm3	chr3:90072649-90092130+
chr11	95833461	95833760	diffreps_peak_31563	0.719174	299	uc007lap.1	Phospho1	3.21174	0.190909	0.555598	up	UCSC_knowngene	6571	chr11:95713008-95835115+	exon sense-overlapping	NM_153104	Phospho1	chr11:95824500-95832140+
chr17	32364181	32364200	diffreps_peak_76280	0.376888	19	ENSMUST00000168943	Wiz	2.08048	0.419868	0.932902	up	Ensembl	743	chr17:32361675-32364463-	exon sense-overlapping	NM_212438	Wiz	chr17:32354050-32387817-
chr14	122478301	122478680	diffreps_peak_58012	1.90609	379	ENSMUST00000137059	Zic2	1.25986	0.0124141	0.0584598	up	Ensembl	765	chr14:122478100-122479050+	exon sense-overlapping	ENSMUST00000075888	Zic2	chr14:122475435-122479852+
chr15	97761467	97761581	diffreps_peak_65172	0.233907	114	ENSMUST00000149419	Rapgef3	1.41598	0.58357	1	up	Ensembl	856	chr15:97759359-97767046-	exon sense-overlapping	ENSMUST00000128775	Rapgef3	chr15:97744956-97767664-
chr10	39121001	39121220	diffreps_peak_15621	0.879634	219	ENSMUST00000154981	Fam229b	1.40789	0.131937	0.419831	up	Ensembl	2884	chr10:39119619-39133857-	exon sense-overlapping	ENSMUST00000124941	Fam229b	chr10:39118819-39133900-
chr8	45803601	45803746	diffreps_peak_171594	0.713527	145	ENSMUST00000136344	Sorbs2	1.22275	0.193407	0.561029	up	Ensembl	626	chr8:45803208-45803919+	exon sense-overlapping	ENSMUST00000135336	Sorbs2	chr8:45627803-45827873+
chr4	152426414	152426660	diffreps_peak_129210	1.1119	246	ENSMUST00000162518	Kcnab2	1.9293	0.0772853	0.277899	up	Ensembl	491	chr4:152426415-152448741-	exon sense-overlapping	ENSMUST00000030768	Kcnab2	chr4:152390745-152477525-
chr17	34114221	34114460	diffreps_peak_76569	0.115469	239	ENSMUST00000148143	Brd2	1.03444	0.766534	1	up	Ensembl	683	chr17:34113759-34114951-	exon sense-overlapping	ENSMUST00000173032	Brd2	chr17:34113761-34114977-
chr2	22588102	22588300	diffreps_peak_93736	0.536403	198	ENSMUST00000117219	Gm13340	1.88282	0.290802	0.740894	up	Ensembl	1545	chr2:22588103-22589647-	intronic antisense	ENSMUST00000044749	Myo3a	chr2:22227503-22618252+
chr15	37943741	37943792	diffreps_peak_60287	0.909435	51	ENSMUST00000148102	Gm3362	1.51459	0.123187	0.399153	up	Ensembl	466	chr15:37943327-37943792-	intron sense-overlapping	ENSMUST00000146821	Rrm2b	chr15:37927245-37960891-
chr16	36924456	36924740	diffreps_peak_69367	0.0374638	284	ENSMUST00000152864	Golgb1	1.0007	0.917352	1	up	Ensembl	773	chr16:36924457-36928371+	exon sense-overlapping	ENSMUST00000114812	Golgb1	chr16:36875168-36933085+
chr7	45495501	45495613	diffreps_peak_159439	0.172426	112	ENSMUST00000151940	Nucb1	1.19072	0.672317	1	up	Ensembl	771	chr7:45495427-45503247-	exon sense-overlapping	NM_008749	Nucb1	chr7:45492674-45510408-
chr16	20678341	20678674	diffreps_peak_68134	1.00914	333	ENSMUST00000132320	Eif4g1	1.39142	0.0979164	0.336338	up	Ensembl	5004	chr16:20678276-20692881+	exon sense-overlapping	ENSMUST00000142344	Eif4g1	chr16:20672749-20683836+
chr10	12922573	12922740	diffreps_peak_13943	7.9498	167	NR_038027	B230208H11Rik	24.4143	1.12254e-08	2.75922e-07	up	RefSeq	1182	chr10:12916646-12923127-	intergenic
chr7	143713495	143713840	diffreps_peak_167643	0.826515	345	ENSMUST00000153864	Osbpl5	2.40669	0.149103	0.461209	up	Ensembl	700	chr7:143713496-143740299-	exon sense-overlapping	NM_024289	Osbpl5	chr7:143688762-143741963-
chr4	146263558	146263780	diffreps_peak_128115	5.76746	222	ENSMUST00000121771	Gm13168	23.8889	1.70819e-06	1.47279e-05	up	Ensembl	632	chr4:146263559-146264190+	intergenic
chr16	91671981	91672240	diffreps_peak_72606	6.96447	259	uc007zya.1	Son	23.5409	1.08526e-07	1.27168e-06	up	UCSC_knowngene	10879	chr16:91654611-91679192+	exon sense-overlapping	ENSMUST00000122302	Son	chr16:91647885-91679221+
chr11	77392981	77393200	diffreps_peak_29632	0.0933014	219	ENSMUST00000180545	Ssh2	1.05818	0.806675	1	up	Ensembl	2567	chr11:77391437-77394003+	exon sense-overlapping	ENSMUST00000037912	Ssh2	chr11:77216287-77460220+
chr19	4109781	4109996	diffreps_peak_87217	0.763171	215	ENSMUST00000145915	Pitpnm1	1.48459	0.172516	0.515102	up	Ensembl	589	chr19:4109648-4110734+	exon sense-overlapping	ENSMUST00000049658	Pitpnm1	chr19:4099998-4113965+
chr5	145127561	145127726	diffreps_peak_143122	0.956944	165	ENSMUST00000144375	Arpc1b	1.50505	0.110422	0.368606	up	Ensembl	772	chr5:145127223-145128088+	exon sense-overlapping	NM_023142	Arpc1b	chr5:145114256-145128186+
chr7	25005754	25005957	diffreps_peak_156489	0.901632	203	ENSMUST00000125444	Atp1a3	1.31071	0.12542	0.403577	up	Ensembl	560	chr7:25000571-25005957-	exon sense-overlapping	NM_001290469	Atp1a3	chr7:24978169-25005937-
chr9	107745941	107746160	diffreps_peak_186617	0.177689	219	ENSMUST00000182792	Rbm5	1.09518	0.664218	1	up	Ensembl	4718	chr9:107745194-107749911-	exon sense-overlapping	ENSMUST00000182659	Rbm5	chr9:107740371-107770996-
chr8	124862724	124862860	diffreps_peak_178229	0.25362	136	uc009nxr.1	AK148282	1.60161	0.557674	1	up	UCSC_knowngene	1119	chr8:124831698-124863703+	natural antisense	NM_025615	2810004N23Rik	chr8:124839355-124863029-
chr15	86159221	86159468	diffreps_peak_64291	7.89533	247	ENSMUST00000150767	Cerk	23.4458	1.27254e-08	2.88816e-07	up	Ensembl	3896	chr15:86139128-86159468-	exon sense-overlapping	ENSMUST00000044332	Cerk	chr15:86139129-86186141-
chr4	153957328	153957481	diffreps_peak_129298	7.36332	153	ENSMUST00000133524	A430005L14Rik	23.2102	4.33188e-08	6.34003e-07	up	Ensembl	464	chr4:153957329-153960734+	exon sense-overlapping	NM_001163019	A430005L14Rik	chr4:153957237-153961924+
chr10	80132681	80132880	diffreps_peak_18944	7.01425	199	ENSMUST00000146180	Dos	22.9712	9.67719e-08	1.15969e-06	up	Ensembl	771	chr10:80132536-80134681-	exon sense-overlapping	ENSMUST00000105369	Dos	chr10:80130551-80139365-
chr11	30529257	30529340	diffreps_peak_25324	0.27166	83	ENSMUST00000121149	Gm12096	1.34935	0.534984	1	up	Ensembl	829	chr11:30528295-30529401+	intronic antisense	ENSMUST00000074613	Acyp2	chr11:30505991-30649587-
chr9	37418839	37419320	diffreps_peak_181372	0.536185	481	ENSMUST00000171467	Robo3	1.90961	0.290948	0.741115	up	Ensembl	3222	chr9:37416045-37422603-	exon sense-overlapping	ENSMUST00000034643	Robo3	chr9:37416045-37430134-
chr14	28509661	28510180	diffreps_peak_52367	7.65262	519	ENSMUST00000180668	Gm2670	22.759	2.22525e-08	4.02831e-07	up	Ensembl	2804	chr14:28508074-28511392-	intronic antisense	NM_009524	Wnt5a	chr14:28505473-28525515+
chr4	45489181	45489400	diffreps_peak_119809	0.393944	219	ENSMUST00000125599	Shb	1.73003	0.403697	0.911238	up	Ensembl	737	chr4:45447506-45489403-	exon sense-overlapping	ENSMUST00000061986	Shb	chr4:45423278-45530330-
chr2	165861884	165861940	diffreps_peak_105041	0.245075	56	ENSMUST00000139907	Zmynd8	1.0711	0.568755	1	up	Ensembl	584	chr2:165842783-165862005-	exon sense-overlapping	NM_001252587	Zmynd8	chr2:165827124-165884838-
chr10	21290021	21290228	diffreps_peak_14577	6.65404	207	ENSMUST00000182266	Gm2467	22.75	2.21798e-07	2.30544e-06	up	Ensembl	1010	chr10:21289219-21290228+	intergenic
chr6	85802977	85803077	diffreps_peak_148954	0.233638	100	NR_040440	Alms1-ps2	1.40528	0.583931	1	up	RefSeq	1170	chr6:85792117-85804057+	intergenic
chrX	9009161	9009560	diffreps_peak_188955	2.26139	399	ENSMUST00000119765	Gm9431	22.7	0.00547787	0.0281239	up	Ensembl	1051	chrX:9009027-9010077-	intergenic
chr6	90780481	90780560	diffreps_peak_149438	12.3415	79	uc009cxs.1	AK083777	22.5862	4.55491e-13	4.30841e-10	up	UCSC_knowngene	1549	chr6:90780482-90782030-	intron sense-overlapping	NM_001134384	Iqsec1	chr6:90659598-90810123-
chr10	81315401	81315660	diffreps_peak_19616	0.176834	259	ENSMUST00000159895	Pip5k1c	1.03202	0.665527	1	up	Ensembl	897	chr10:81313988-81315782+	exon sense-overlapping	NM_008844	Pip5k1c	chr10:81292963-81319974+
chr7	16824101	16824217	diffreps_peak_155452	0.00816249	116	ENSMUST00000138070	Strn4	1.01826	0.981381	1	up	Ensembl	435	chr7:16824058-16828751+	exon sense-overlapping	ENSMUST00000137885	Strn4	chr7:16822048-16824182+
chr10	39653921	39653984	diffreps_peak_15670	7.17379	63	ENSMUST00000136862	E130307A14Rik	22.2389	6.70204e-08	8.76284e-07	up	Ensembl	608	chr10:39653897-39728181-	natural antisense	ENSMUST00000019987	Traf3ip2	chr10:39612934-39655307+
chr11	6006461	6006760	diffreps_peak_24019	0.0314684	299	uc007hxv.1	BC019819	1.06631	0.930104	1	up	UCSC_knowngene	2041	chr11:6006288-6008328+	intronic antisense	ENSMUST00000101586	Camk2b	chr11:5972217-6065570-
chr7	28397001	28397200	diffreps_peak_157243	0.0292195	199	ENSMUST00000145339	Paf1	1.00391	0.934933	1	up	Ensembl	467	chr7:28396651-28397211+	exon sense-overlapping	NM_019458	Paf1	chr7:28392996-28399383+
chr18	61646381	61646480	diffreps_peak_85244	8.40194	99	NR_045402	Mir143hg	21.9424	3.96334e-09	1.60662e-07	up	RefSeq	1381	chr18:61645878-61665538-	intergenic
chr14	20378741	20378876	diffreps_peak_51564	8.17502	135	uc007sjm.1	AK041570	21.8133	6.68308e-09	2.10146e-07	up	UCSC_knowngene	1899	chr14:20364567-20378876-	natural antisense	NM_172379	Fam149b	chr14:20348162-20383491+
chr11	102195801	102196322	diffreps_peak_32799	0.96319	521	ENSMUST00000149087	Hdac5	1.30091	0.108845	0.366058	up	Ensembl	5406	chr11:102195749-102218929-	exon sense-overlapping	ENSMUST00000107152	Hdac5	chr11:102195751-102230166-
chr1	86547501	86547617	diffreps_peak_5817	7.68057	116	uc011wok.1	Pde6d	21.582	2.08655e-08	3.8759e-07	up	UCSC_knowngene	1185	chr1:86543015-86582501-	exon sense-overlapping	ENSMUST00000146220	Pde6d	chr1:86545392-86582547-
chr13	55093181	55093440	diffreps_peak_46917	1.25315	259	ENSMUST00000124561	Uimc1	1.87824	0.0558275	0.212873	up	Ensembl	438	chr13:55085639-55093508-	exon sense-overlapping	ENSMUST00000026997	Uimc1	chr13:55027880-55100295-
chr17	35824341	35824398	diffreps_peak_76935	0.031419	57	ENSMUST00000174227	Flot1	1.05844	0.93021	1	up	Ensembl	405	chr17:35823426-35824398+	exon sense-overlapping	ENSMUST00000174080	Flot1	chr17:35823347-35832610+
chr5	115990301	115990640	diffreps_peak_138659	2.72138	339	ENSMUST00000134609	Cit	1.27078	0.00189942	0.010696	up	Ensembl	3456	chr5:115987174-115990790+	exon sense-overlapping	ENSMUST00000051704	Cit	chr5:115845644-116008947+
chr1	150445867	150446040	diffreps_peak_10130	0.0696508	173	ENSMUST00000128417	Tpr	1.02213	0.851823	1	up	Ensembl	1334	chr1:150440197-150449927+	natural antisense	NM_021400	Prg4	chr1:150449412-150466165-
chr7	29309605	29309752	diffreps_peak_157521	0.233226	147	ENSMUST00000126169	Dpf1	1.13197	0.584486	1	up	Ensembl	366	chr7:29309606-29311697+	exon sense-overlapping	ENSMUST00000108230	Dpf1	chr7:29307924-29316896+
chr5	115615368	115615700	diffreps_peak_138533	0.442271	332	ENSMUST00000137523	Gcn1l1	1.74383	0.361184	0.852706	up	Ensembl	754	chr5:115614872-115616019+	exon sense-overlapping	ENSMUST00000094427	Gcn1l1	chr5:115605696-115622648+
chr11	102863336	102863460	diffreps_peak_33028	0.0285026	124	ENSMUST00000181125	Gm26668	1.03753	0.936478	1	up	Ensembl	3635	chr11:102863337-103075903+	natural antisense	ENSMUST00000173679	Eftud2	chr11:102838801-102877714-
chr15	79420841	79421040	diffreps_peak_63220	0.0559892	199	ENSMUST00000127155	Csnk1e	1.10154	0.879044	1	up	Ensembl	741	chr15:79419149-79421315-	exon sense-overlapping	ENSMUST00000120859	Csnk1e	chr15:79419166-79442002-
chr10	80254881	80255140	diffreps_peak_18996	9.8135	259	ENSMUST00000155336	Ndufs7	1.8028	1.53637e-10	3.88427e-08	up	Ensembl	770	chr10:80253315-80255140+	exon sense-overlapping	NM_029272	Ndufs7	chr10:80249452-80256792+
chr17	56605281	56605520	diffreps_peak_79021	5.15154	239	ENSMUST00000182454	Safb	1.33089	7.05442e-06	5.56109e-05	up	Ensembl	1073	chr17:56605222-56606294+	exon sense-overlapping	ENSMUST00000095224	Safb	chr17:56585059-56606294+
chr2	120022060	120022200	diffreps_peak_101042	0.553108	140	ENSMUST00000148161	Mapkbp1	1.51025	0.279829	0.723169	up	Ensembl	709	chr2:120022061-120023034+	exon sense-overlapping	ENSMUST00000066058	Mapkbp1	chr2:119972699-120027408+
chr8	84925274	84925541	diffreps_peak_175072	0.750667	267	ENSMUST00000138221	Mast1	1.70116	0.177555	0.526503	up	Ensembl	760	chr8:84921385-84925746-	exon sense-overlapping	NM_019945	Mast1	chr8:84911853-84937353-
chr8	84617103	84617160	diffreps_peak_174898	0.00789934	57	ENSMUST00000127527	Gm16183	1.01316	0.981976	1	up	Ensembl	1193	chr8:84611202-84617184-	natural antisense	NM_001252059	Cacna1a	chr8:84415364-84640249+
chr9	45859581	45859653	diffreps_peak_182278	0.0796128	72	uc012gsi.2	AK077428	1.07485	0.832506	1	up	UCSC_knowngene	2885	chr9:45856769-45859653-	natural antisense	ENSMUST00000034591	Bace1	chr9:45838580-45864399+
chr14	66156280	66156427	diffreps_peak_54887	0.213471	147	ENSMUST00000148104	Ptk2b	1.1395	0.611687	1	up	Ensembl	1284	chr14:66156281-66163906-	exon sense-overlapping	NM_001162365	Ptk2b	chr14:66153257-66281052-
chr17	35963261	35963392	diffreps_peak_77030	0.216005	131	ENSMUST00000174834	Abcf1	1.14114	0.608127	1	up	Ensembl	787	chr17:35961701-35964272-	exon sense-overlapping	ENSMUST00000043757	Abcf1	chr17:35956819-35969761-
chr5	20950988	20951320	diffreps_peak_131090	0.481993	332	NR_030699	A630072M18Rik	1.23855	0.329615	0.804167	up	RefSeq	5410	chr5:20950989-20956398+	natural antisense	NM_001080977	Rsbn1l	chr5:20893024-20951822-
chrX	120161321	120161620	diffreps_peak_194797	0	299	ENSMUST00000121760	Gm5863	1.09877	1	1	up	Ensembl	1008	chrX:120160710-120161717+	intergenic
chr15	83137881	83138400	diffreps_peak_63918	5.03555	519	ENSMUST00000150926	Poldip3	1.40863	9.214e-06	7.15462e-05	up	Ensembl	837	chr15:83137828-83149336-	exon sense-overlapping	ENSMUST00000058793	Poldip3	chr15:83125978-83149384-
chr3	88440761	88441120	diffreps_peak_111811	0.367605	359	ENSMUST00000156108	Sema4a	1.87473	0.428939	0.944588	up	Ensembl	2108	chr3:88435962-88441139-	exon sense-overlapping	ENSMUST00000165898	Sema4a	chr3:88435962-88459101-
chr1	9601121	9601560	diffreps_peak_476	1.07577	439	ENSMUST00000148585	2610203C22Rik	1.31697	0.0839897	0.29748	up	Ensembl	3475	chr1:9600413-9631144-	natural antisense	ENSMUST00000088666	3110035E14Rik	chr1:9601199-9627143+
chr7	45009041	45009240	diffreps_peak_159176	0.107801	199	ENSMUST00000148227	Scaf1	1.08912	0.780188	1	up	Ensembl	6459	chr7:45002948-45013973-	exon sense-overlapping	ENSMUST00000151264	Scaf1	chr7:45013252-45015857-
chr4	78659881	78660147	diffreps_peak_122059	7.55113	266	ENSMUST00000132470	Gm11261	21.3786	2.81104e-08	4.70671e-07	up	Ensembl	838	chr4:78659858-78661588-	intergenic
chr16	58463561	58463760	diffreps_peak_70678	7.69234	199	ENSMUST00000134324	Dcbld2	21.1452	2.03077e-08	3.81903e-07	up	Ensembl	891	chr16:58456377-58463823+	exon sense-overlapping	ENSMUST00000046663	Dcbld2	chr16:58408443-58469727+
chr11	33710941	33711140	diffreps_peak_25515	0.196125	199	ENSMUST00000125068	Gm12120	1.07366	0.636613	1	up	Ensembl	592	chr11:33705550-33711435+	intronic antisense	NM_001190885	Kcnip1	chr11:33629341-33843585-
chr7	97670741	97670882	diffreps_peak_163595	2.57941	141	ENSMUST00000156060	Rsf1	1.21862	0.00263386	0.0144653	up	Ensembl	5695	chr7:97579897-97686420+	exon sense-overlapping	ENSMUST00000042399	Rsf1	chr7:97579896-97692782+
chr4	136052621	136052900	diffreps_peak_126724	6.90632	279	ENSMUST00000125726	Rpl11	21.013	1.24072e-07	1.41487e-06	up	Ensembl	807	chr4:136049990-136052996-	exon sense-overlapping	NM_025919	Rpl11	chr4:136049948-136053371-
chr11	120046981	120047167	diffreps_peak_35341	0.1713	186	ENSMUST00000150730	Aatk	1.113	0.674062	1	up	Ensembl	6455	chr11:120007313-120047167-	exon sense-overlapping	NM_001198785	Aatk	chr11:120007316-120047145-
chr8	93811650	93811740	diffreps_peak_175590	0.0165337	90	uc009mvj.1	Gnao1	1.01806	0.962645	1	up	UCSC_knowngene	733	chr8:93810838-93811767+	exon sense-overlapping	NM_010308	Gnao1	chr8:93810838-93969388+
chr19	55743061	55743197	diffreps_peak_91568	0.584144	136	ENSMUST00000133008	Tcf7l2	2.09305	0.260529	0.692154	up	Ensembl	691	chr19:55742845-55910681+	exon sense-overlapping	ENSMUST00000041717	Tcf7l2	chr19:55741820-55933252+
chr11	61159204	61159384	diffreps_peak_27698	1.13532	180	ENSMUST00000174035	Usp22	1.65113	0.0732278	0.265938	up	Ensembl	520	chr11:61155710-61159384-	exon sense-overlapping	NM_001004143	Usp22	chr11:61151781-61175059-
chr9	20869301	20869453	diffreps_peak_179799	0.880501	152	ENSMUST00000177067	A230050P20Rik	1.63144	0.131674	0.419233	up	Ensembl	1043	chr9:20869277-20873771+	exon sense-overlapping	ENSMUST00000043911	A230050P20Rik	chr9:20868642-20874307+
chr10	58228341	58228411	diffreps_peak_16772	7.53919	70	ENSMUST00000071408	Gm10807	20.8974	2.88942e-08	4.79873e-07	up	Ensembl	555	chr10:58227857-58228411-	intergenic
chr17	24900787	24900940	diffreps_peak_75011	3.27829	153	ENSMUST00000156663	Mapk8ip3	1.46055	0.000526879	0.00326992	up	Ensembl	906	chr17:24899664-24901086-	exon sense-overlapping	ENSMUST00000121723	Mapk8ip3	chr17:24897534-24936929-
chr8	122408181	122408560	diffreps_peak_177812	0.124224	379	ENSMUST00000177123	Zc3h18	1.28492	0.751235	1	up	Ensembl	4789	chr8:122407843-122417359+	exon sense-overlapping	NM_001029993	Zc3h18	chr8:122376616-122417360+
chr19	8847666	8847982	diffreps_peak_88497	1.10996	316	ENSMUST00000159571	Bscl2	1.53056	0.077631	0.278943	up	Ensembl	2806	chr19:8839373-8848667+	exon sense-overlapping	ENSMUST00000171649	Bscl2	chr19:8837467-8848683+
chr2	25058161	25058321	diffreps_peak_93915	0.111833	160	ENSMUST00000140733	Nsmf	1.09681	0.772978	1	up	Ensembl	854	chr2:25057576-25059659+	exon sense-overlapping	NM_020276	Nsmf	chr2:25054379-25062881+
chr2	160747763	160747880	diffreps_peak_104431	0.85004	117	ENSMUST00000154038	RP23-393F23.11	2.13266	0.141241	0.442689	up	Ensembl	979	chr2:160743927-160751909-	natural antisense	ENSMUST00000109462	Plcg1	chr2:160731733-160763286+
chr11	118263034	118263200	diffreps_peak_34804	1.02222	166	ENSMUST00000148998	Usp36	1.69323	0.0950123	0.328088	up	Ensembl	1212	chr11:118260854-118263284-	exon sense-overlapping	ENSMUST00000092382	Usp36	chr11:118259653-118290244-
chr2	152324241	152324440	diffreps_peak_103349	0.807777	199	ENSMUST00000128645	Rbck1	1.29073	0.155677	0.476919	up	Ensembl	1595	chr2:152322938-152324616-	exon sense-overlapping	NM_019705	Rbck1	chr2:152316334-152332639-
chr1	180094701	180094846	diffreps_peak_12177	0.851674	145	ENSMUST00000139002	Cdc42bpa	1.39413	0.14071	0.441358	up	Ensembl	732	chr1:180084483-180094846+	exon sense-overlapping	ENSMUST00000111117	Cdc42bpa	chr1:179960585-180165603+
chr11	3235544	3235660	diffreps_peak_23496	0.51925	116	ENSMUST00000147534	Eif4enif1	1.3339	0.302517	0.760496	up	Ensembl	297	chr11:3235545-3239441+	exon sense-overlapping	ENSMUST00000135223	Eif4enif1	chr11:3227813-3239459+
chr2	32372161	32372400	diffreps_peak_95359	0.172334	239	ENSMUST00000145957	Ciz1	1.32442	0.672459	1	up	Ensembl	876	chr2:32371835-32374556+	exon sense-overlapping	ENSMUST00000113338	Ciz1	chr2:32363810-32378298+
chr17	74608941	74609320	diffreps_peak_80281	1.81345	379	ENSMUST00000181387	Gm26749	1.75354	0.0153657	0.0704763	up	Ensembl	1933	chr17:74575381-74617119-	natural antisense	ENSMUST00000177957	Birc6	chr17:74598121-74619755+
chr17	12983456	12983740	diffreps_peak_74074	0.0812365	284	ENSMUST00000161901	Wtap	1.0962	0.829399	1	up	Ensembl	574	chr17:12981751-12983972-	exon sense-overlapping	ENSMUST00000162395	Wtap	chr17:12980855-12986241-
chr15	58026166	58026200	diffreps_peak_61315	0.128768	34	uc007vtb.1	BC039940	1.07714	0.743417	1	up	UCSC_knowngene	485	chr15:58026167-58027895-	intron sense-overlapping	ENSMUST00000100655	9130401M01Rik	chr15:58022276-58034294-
chr7	29071602	29071803	diffreps_peak_157451	7.18258	201	ENSMUST00000180926	Gm26604	20.471	6.56779e-08	8.62275e-07	up	Ensembl	1758	chr7:29071603-29081134+	natural antisense	ENSMUST00000032813	Ryr1	chr7:29003344-29125151-
chr13	17695303	17695420	diffreps_peak_44527	7.79237	117	uc007pnz.1	AK038969	20.3811	1.61298e-08	3.30479e-07	up	UCSC_knowngene	1463	chr13:17682713-17695553-	intron sense-overlapping	ENSMUST00000068545	5033411D12Rik	chr13:16857855-17694732-
chr11	98769581	98769820	diffreps_peak_32218	1.20436	239	ENSMUST00000139220	Nr1d1	1.3107	0.0624658	0.23307	up	Ensembl	781	chr11:98769347-98770426-	exon sense-overlapping	ENSMUST00000064941	Nr1d1	chr11:98767932-98775333-
chrX	169985041	169985232	diffreps_peak_197211	0.163527	191	ENSMUST00000144738	Gm15726	1.07974	0.686235	1	up	Ensembl	509	chrX:169979047-169985232-	natural antisense	ENSMUST00000163810	Mid1	chrX:169926951-169990798+
chr1	57902070	57902200	diffreps_peak_3744	0.27111	130	ENSMUST00000164353	Spats2l	1.37601	0.535661	1	up	Ensembl	325	chr1:57902071-57940374+	exon sense-overlapping	ENSMUST00000163239	Spats2l	chr1:57774365-57946964+
chr2	121290841	121291040	diffreps_peak_101141	0.455151	199	ENSMUST00000131901	Map1a	1.2587	0.35063	0.836892	up	Ensembl	457	chr2:121289770-121291073+	exon sense-overlapping	ENSMUST00000094639	Map1a	chr2:121289600-121310832+
chr11	88185161	88185360	diffreps_peak_30961	0.137808	199	ENSMUST00000133149	Cuedc1	1.28311	0.728101	1	up	Ensembl	1844	chr11:88099290-88185365+	exon sense-overlapping	NM_001172099	Cuedc1	chr11:88169565-88194140+
chr10	81575221	81575420	diffreps_peak_19835	0.0114809	199	ENSMUST00000140433	Tle2	1.00121	0.973911	1	up	Ensembl	3625	chr10:81574561-81590466+	exon sense-overlapping	ENSMUST00000136341	Tle2	chr10:81574739-81580325+
chr14	56748821	56748943	diffreps_peak_54358	1.07332	122	ENSMUST00000168524	Pspc1	1.38472	0.0844648	0.298826	up	Ensembl	528	chr14:56748535-56761867-	exon sense-overlapping	NM_025682	Pspc1	chr14:56722449-56778316-
chr8	71667761	71668000	diffreps_peak_173734	0.123156	239	ENSMUST00000175780	Unc13a	1.21889	0.753085	1	up	Ensembl	2569	chr8:71660346-71668082-	exon sense-overlapping	ENSMUST00000030170	Unc13a	chr8:71624417-71671757-
chr14	55075201	55075420	diffreps_peak_54152	0.235478	219	NR_004444	Zfhx2os	1.38838	0.581463	1	up	RefSeq	2487	chr14:55073091-55075874+	natural antisense	NM_001039198	Zfhx2	chr14:55061659-55092048-
chr1	85594141	85594480	diffreps_peak_5734	0.524417	339	ENSMUST00000143363	Sp110	2.62046	0.298939	0.754692	up	Ensembl	2583	chr1:85593444-85598779-	exon sense-overlapping	NM_175397	Sp110	chr1:85576899-85603891-
chrX	46456061	46456294	diffreps_peak_190622	7.61024	233	ENSMUST00000078326	Gm4987	20.2576	2.45336e-08	4.30377e-07	up	Ensembl	408	chrX:46455887-46456294-	intergenic
chr10	81316841	81317060	diffreps_peak_19622	0.178197	219	ENSMUST00000159636	Pip5k1c	1.24612	0.663442	1	up	Ensembl	810	chr10:81316842-81318013+	exon sense-overlapping	NM_001293647	Pip5k1c	chr10:81292963-81319974+
chr16	18252981	18253360	diffreps_peak_67899	9.99866	379	ENSMUST00000147273	Trmt2a	19.8988	1.00308e-10	2.783e-08	up	Ensembl	2971	chr16:18249009-18253508+	exon sense-overlapping	NM_001081000	Trmt2a	chr16:18248883-18254772+
chr4	141017901	141018220	diffreps_peak_127485	0.0983882	319	ENSMUST00000126973	Crocc	1.09673	0.797282	1	up	Ensembl	815	chr4:141016979-141018800-	exon sense-overlapping	NM_172122	Crocc	chr4:141016637-141053661-
chr4	44121892	44121960	diffreps_peak_119736	7.50987	68	NR_040414	Gm12504	19.8021	3.09122e-08	5.00794e-07	up	RefSeq	2231	chr4:44121893-44124123+	intergenic
chr15	83135293	83135600	diffreps_peak_63916	0.781107	307	ENSMUST00000135013	Poldip3	1.3171	0.165536	0.499516	up	Ensembl	680	chr15:83133265-83135911-	exon sense-overlapping	ENSMUST00000058793	Poldip3	chr15:83125978-83149384-
chr4	137994021	137994150	diffreps_peak_126967	0.285978	129	ENSMUST00000127707	Eif4g3	1.13439	0.517634	1	up	Ensembl	340	chr4:137993476-137994150+	exon sense-overlapping	ENSMUST00000105831	Eif4g3	chr4:137993456-138207079+
chr8	13015001	13015220	diffreps_peak_168833	0.0773719	219	ENSMUST00000127229	Mcf2l	1.09464	0.836812	1	up	Ensembl	666	chr8:13013062-13015365+	exon sense-overlapping	ENSMUST00000134227	Mcf2l	chr8:13011510-13018094+
chr9	67032721	67032864	diffreps_peak_183977	6.05117	143	ENSMUST00000129466	Tpm1	1.50735	8.88857e-07	8.05995e-06	up	Ensembl	1123	chr9:67032220-67049118-	exon sense-overlapping	ENSMUST00000113687	Tpm1	chr9:67027989-67049143-
chr9	108117061	108117820	diffreps_peak_186760	5.2314	759	ENSMUST00000181473	F630040L22Rik	1.59204	5.86942e-06	4.67371e-05	up	Ensembl	3155	chr9:108104965-108118343+	natural antisense	ENSMUST00000035208	Bsn	chr9:108096022-108190384-
chrX	75106261	75106381	diffreps_peak_192259	1.16759	120	ENSMUST00000137286	Dkc1	3.48869	0.067984	0.250097	up	Ensembl	610	chrX:75105949-75108276+	exon sense-overlapping	NM_001030307	Dkc1	chrX:75095854-75109776+
chr3	90087421	90087572	diffreps_peak_112244	0.00185629	151	ENSMUST00000133281	Tpm3	1.01155	0.995735	1	up	Ensembl	427	chr3:90087309-90089807+	exon sense-overlapping	NM_001293748	Tpm3	chr3:90072651-90092130+
chr2	155502661	155503133	diffreps_peak_103702	0.538942	472	ENSMUST00000148296	Ggt7	1.44338	0.289107	0.738022	up	Ensembl	874	chr2:155495953-155503133-	exon sense-overlapping	NM_144786	Ggt7	chr2:155490380-155514846-
chr17	7946101	7946340	diffreps_peak_73719	0.13797	239	uc008aiq.1	AK051008	1.15296	0.727831	1	up	UCSC_knowngene	2050	chr17:7881106-7946426-	intronic antisense	NM_145968	Tagap	chr17:7926000-7934897+
chr4	109403861	109403993	diffreps_peak_123783	0.192961	132	NR_131195	Gm12750	1.24931	0.641267	1	up	RefSeq	2532	chr4:109402279-109406257-	bidirectional	ENSMUST00000124209	Ttc39a	chr4:109406623-109428134+
chr15	89474721	89475005	diffreps_peak_64561	0.565593	284	ENSMUST00000023292	Arsa	1.72031	0.271899	0.708686	up	Ensembl	2699	chr15:89472528-89476113-	exon sense-overlapping	ENSMUST00000165199	Arsa	chr15:89472476-89477425-
chr5	145126821	145127020	diffreps_peak_143119	0.052098	199	ENSMUST00000128229	Arpc1b	1.01804	0.886956	1	up	Ensembl	680	chr5:145125891-145127330+	exon sense-overlapping	ENSMUST00000085679	Arpc1b	chr5:145114215-145129699+
chr2	91933742	91934040	diffreps_peak_99203	0.158056	298	ENSMUST00000138894	Dgkz	1.13091	0.694934	1	up	Ensembl	905	chr2:91933384-91934581-	exon sense-overlapping	ENSMUST00000028667	Dgkz	chr2:91932826-91963657-
chr3	69566741	69567280	diffreps_peak_110852	7.55602	539	ENSMUST00000183259	Gm8565	19.7931	2.77961e-08	4.67116e-07	up	Ensembl	1014	chr3:69566451-69567464-	intergenic
chr4	130047661	130047774	diffreps_peak_125971	7.27746	113	ENSMUST00000131846	Gm12963	19.5172	5.27881e-08	7.32207e-07	up	Ensembl	783	chr4:130024256-130047774-	bidirectional	ENSMUST00000142293	Col16a1	chr4:130047945-130051851+
chr15	100703561	100703608	diffreps_peak_65784	0.262746	47	uc007xsc.1	AK028111	1.73665	0.546077	1	up	UCSC_knowngene	1396	chr15:100695773-100704896+	natural antisense	ENSMUST00000052069	Galnt6	chr15:100691815-100729376-
chr7	19092101	19092360	diffreps_peak_155838	1.12949	259	ENSMUST00000143938	Dmpk	2.73511	0.0742189	0.26877	up	Ensembl	785	chr7:19091483-19092361+	exon sense-overlapping	NM_001190490	Dmpk	chr7:19083849-19093820+
chr4	147378928	147379200	diffreps_peak_128207	7.67458	272	ENSMUST00000121570	Gm8178	19.4672	2.11553e-08	3.90264e-07	up	Ensembl	646	chr4:147378929-147379574+	intron sense-overlapping	ENSMUST00000133078	Gm13145	chr4:147361303-147390289+
chr4	102927281	102927585	diffreps_peak_123325	2.74003	304	ENSMUST00000141624	Sgip1	1.82368	0.00181957	0.0102905	up	Ensembl	523	chr4:102927190-102928912+	exon sense-overlapping	NM_001285852	Sgip1	chr4:102760135-102972682+
chr14	20794238	20794460	diffreps_peak_51670	0.294535	222	uc007skw.1	AK039820	1.634	0.507534	1	up	UCSC_knowngene	440	chr14:20794239-20796551+	bidirectional	NM_001039139	Camk2g	chr14:20734873-20794088-
chr18	34759461	34759608	diffreps_peak_83380	0.155049	147	uc008elj.1	BC094408	1.3478	0.699763	1	up	UCSC_knowngene	536	chr18:34758945-34759608-	natural antisense	ENSMUST00000049281	Fam53c	chr18:34758906-34773760+
chr9	21032281	21032357	diffreps_peak_179878	0.0774535	76	ENSMUST00000181169	Gm20603	1.15778	0.836655	1	up	Ensembl	3485	chr9:21028307-21032357-	natural antisense	NM_008319	Icam5	chr9:21032038-21039036+
chr12	3806101	3806232	diffreps_peak_35853	0.199559	131	ENSMUST00000173700	Dnmt3a	1.91344	0.631599	1	up	Ensembl	4014	chr12:3806007-3838814+	exon sense-overlapping	NM_001271753	Dnmt3a	chr12:3807160-3914443+
chr18	82692948	82693040	diffreps_peak_86688	0.415155	92	ENSMUST00000181931	Gm10524	1.11981	0.384455	0.8865	up	Ensembl	1984	chr18:82692949-82706174+	bidirectional	uc012bfo.1	Zfp236	chr18:82593597-82692734-
chr7	126864319	126864528	diffreps_peak_166143	0.0660324	209	ENSMUST00000138793	Hirip3	1.16349	0.858949	1	up	Ensembl	617	chr7:126863843-126864528+	exon sense-overlapping	ENSMUST00000037248	Hirip3	chr7:126861972-126865377+
chr10	75914881	75915180	diffreps_peak_18233	0.412595	299	ENSMUST00000140408	Smarcb1	1.1694	0.386727	0.888804	up	Ensembl	7441	chr10:75896775-75916572-	exon sense-overlapping	NM_011418	Smarcb1	chr10:75896769-75921614-
chr19	4011241	4011428	diffreps_peak_87188	0.245344	187	ENSMUST00000150852	Ndufv1	1.16041	0.568403	1	up	Ensembl	909	chr19:4008753-4012704-	exon sense-overlapping	ENSMUST00000042497	Ndufv1	chr19:4007497-4012806-
chr3	95118021	95118377	diffreps_peak_112593	2.93536	356	ENSMUST00000152333	Vps72	1.7717	0.0011605	0.0067976	up	Ensembl	2139	chr3:95116526-95119302+	exon sense-overlapping	ENSMUST00000009102	Vps72	chr3:95111022-95123051+
chr4	62652661	62652836	diffreps_peak_121042	0.941551	175	ENSMUST00000127254	Rgs3	2.22129	0.114406	0.378916	up	Ensembl	3005	chr4:62652570-62659840+	exon sense-overlapping	NM_019492	Rgs3	chr4:62559847-62659847+
chr2	103724321	103724429	diffreps_peak_100041	7.1604	108	ENSMUST00000132135	Nat10	19.1014	6.91186e-08	8.96778e-07	up	Ensembl	506	chr2:103721661-103724429-	exon sense-overlapping	ENSMUST00000028608	Nat10	chr2:103721256-103761270-
chr2	155970501	155970895	diffreps_peak_103812	0.893575	394	ENSMUST00000149905	Cep250	1.3424	0.127769	0.409558	up	Ensembl	4930	chr2:155956458-155986613+	exon sense-overlapping	ENSMUST00000151569	Cep250	chr2:155956572-155974445+
chr7	141401981	141402180	diffreps_peak_167335	0.0370675	199	ENSMUST00000125597	Taldo1	1.0462	0.91819	1	up	Ensembl	777	chr7:141400154-141402206+	exon sense-overlapping	ENSMUST00000026576	Taldo1	chr7:141392199-141402968+
chr2	34706689	34706832	diffreps_peak_95652	7.8095	143	ENSMUST00000150859	Gapvd1	19.0676	1.55061e-08	3.22028e-07	up	Ensembl	559	chr2:34704347-34712333-	exon sense-overlapping	ENSMUST00000113101	Gapvd1	chr2:34677483-34704386-
chr11	77293881	77294100	diffreps_peak_29623	0.142345	219	ENSMUST00000121455	Gm12346	1.09131	0.720535	1	up	Ensembl	2255	chr11:77293444-77295898+	intron sense-overlapping	NM_177710	Ssh2	chr11:77216425-77460219+
chr3	88207201	88207354	diffreps_peak_111772	7.46234	153	uc008pug.1	AK141565	18.8047	3.44876e-08	5.40109e-07	up	UCSC_knowngene	2203	chr3:88206813-88211295+	intergenic
chr11	70005081	70005300	diffreps_peak_28767	3.77063	219	ENSMUST00000135422	Dvl2	1.98162	0.000169577	0.00112728	up	Ensembl	1010	chr11:70000835-70006013+	exon sense-overlapping	ENSMUST00000019362	Dvl2	chr11:70000595-70010111+
chr10	81582412	81582720	diffreps_peak_19844	4.6549	308	ENSMUST00000129798	Tle2	1.87871	2.21362e-05	0.000163823	up	Ensembl	4388	chr10:81575260-81590470+	exon sense-overlapping	ENSMUST00000124854	Tle2	chr10:81587969-81590473+
chr19	16317141	16317274	diffreps_peak_89084	4.39163	133	ENSMUST00000167656	Gnaq	18.3611	4.05854e-05	0.000291099	up	Ensembl	481	chr19:16219632-16317274+	exon sense-overlapping	NM_008139	Gnaq	chr19:16132831-16387453+
chr16	5240073	5240200	diffreps_peak_66489	7.73501	127	ENSMUST00000142902	Alg1	18.2671	1.84073e-08	3.56876e-07	up	Ensembl	708	chr16:5240074-5243724+	exon sense-overlapping	ENSMUST00000100196	Alg1	chr16:5233621-5244903+
chr11	77168890	77168916	diffreps_peak_29608	7.72482	26	ENSMUST00000155085	Efcab5	18.2159	1.88442e-08	3.62861e-07	up	Ensembl	253	chr11:77151818-77168916-	exon sense-overlapping	ENSMUST00000108400	Efcab5	chr11:77089915-77188968-
chrX	7765506	7765720	diffreps_peak_188762	0.125314	214	ENSMUST00000144715	Tfe3	1.38753	0.749353	1	up	Ensembl	636	chrX:7762560-7766071+	exon sense-overlapping	NM_001105197	Tfe3	chrX:7763943-7775202+
chr10	58228221	58228411	diffreps_peak_16770	0.0909534	190	ENSMUST00000071408	Gm10807	1.07099	0.811048	1	up	Ensembl	555	chr10:58227857-58228411-	intergenic
chr2	121450481	121450740	diffreps_peak_101225	0.411749	259	ENSMUST00000134412	Serf2	1.08557	0.387482	0.889845	up	Ensembl	3105	chr2:121449368-121453005+	natural antisense	ENSMUST00000056312	Serinc4	chr2:121451177-121456781-
chr7	16282741	16282850	diffreps_peak_155342	0.304149	109	ENSMUST00000144186	Ccdc9	1.17184	0.496422	1	up	Ensembl	391	chr7:16282691-16286773-	exon sense-overlapping	NM_172297	Ccdc9	chr7:16275464-16284659-
chr1	121492975	121493200	diffreps_peak_7948	1.17353	225	ENSMUST00000152863	Gm15392	2.59496	0.0670608	0.247269	up	Ensembl	778	chr1:121489296-121493203-	natural antisense	NM_029955	Ccdc93	chr1:121431067-121506460+
chr11	102399194	102399320	diffreps_peak_32917	0.15565	126	ENSMUST00000128331	Rundc3a	1.17656	0.698795	1	up	Ensembl	635	chr11:102398119-102399779+	exon sense-overlapping	NM_016759	Rundc3a	chr11:102393403-102402939+
chr7	127981261	127981520	diffreps_peak_166617	0.107295	259	ENSMUST00000172755	Fus	1.04585	0.781098	1	up	Ensembl	670	chr7:127980216-127981829+	exon sense-overlapping	ENSMUST00000141997	Fus	chr7:127980184-127982007+
chr19	26607341	26607543	diffreps_peak_89584	0.726236	202	ENSMUST00000099537	Smarca2	1.3865	0.18783	0.548966	up	Ensembl	5913	chr19:26607270-26778273+	exon sense-overlapping	ENSMUST00000175842	Smarca2	chr19:26749726-26774305+
chr6	83814641	83814869	diffreps_peak_148796	1.82196	228	ENSMUST00000142806	Paip2b	1.97408	0.0150675	0.0692654	up	Ensembl	2150	chr6:83812857-83831713-	exon sense-overlapping	NM_146169	Paip2b	chr6:83806059-83831741-
chr17	29007741	29007945	diffreps_peak_75927	0.285103	204	ENSMUST00000126893	Stk38	1.2634	0.518677	1	up	Ensembl	1663	chr17:28979766-29007945-	exon sense-overlapping	ENSMUST00000009138	Stk38	chr17:28970885-29007937-
chr8	4202781	4203079	diffreps_peak_168051	0.183313	298	ENSMUST00000177309	Evi5l	1.26435	0.655673	1	up	Ensembl	1654	chr8:4191292-4203079+	exon sense-overlapping	ENSMUST00000176825	Evi5l	chr8:4166739-4208046+
chr4	155410836	155411180	diffreps_peak_129505	8.40543	344	NR_102283	5830444B04Rik	17.9969	3.93163e-09	1.60662e-07	up	RefSeq	2786	chr4:155408309-155421704-	natural antisense	ENSMUST00000123952	2010015L04Rik	chr4:155409258-155421992+
chr10	80234193	80234327	diffreps_peak_18988	0.0483171	134	ENSMUST00000138801	Mum1	1.15422	0.894711	1	up	Ensembl	7927	chr10:80234194-80243903+	exon sense-overlapping	ENSMUST00000020365	Mum1	chr10:80226434-80243903+
chr13	55476145	55476520	diffreps_peak_46986	0.69837	375	ENSMUST00000135705	Dbn1	1.36908	0.200276	0.57526	up	Ensembl	2119	chr13:55475125-55488066-	exon sense-overlapping	ENSMUST00000109921	Dbn1	chr13:55473944-55488061-
chr7	4741861	4742088	diffreps_peak_154293	7.50296	227	ENSMUST00000135541	Suv420h2	17.9718	3.14082e-08	5.06569e-07	up	Ensembl	396	chr7:4740153-4742088+	exon sense-overlapping	ENSMUST00000108582	Suv420h2	chr7:4740167-4747514+
chr14	21625601	21625840	diffreps_peak_51698	0.813304	239	ENSMUST00000182732	Kat6b	1.48673	0.153708	0.472287	up	Ensembl	4671	chr14:21622542-21634589+	exon sense-overlapping	ENSMUST00000182964	Kat6b	chr14:21500892-21672478+
chr8	71642128	71642360	diffreps_peak_173676	0.00389861	232	ENSMUST00000177032	Unc13a	1.01299	0.991063	1	up	Ensembl	1136	chr8:71634889-71642568-	exon sense-overlapping	NM_001029873	Unc13a	chr8:71626712-71671757-
chr14	54644081	54644280	diffreps_peak_53948	0.0822003	199	ENSMUST00000152773	Acin1	1.04143	0.82756	1	up	Ensembl	844	chr14:54642902-54644536-	exon sense-overlapping	NM_023190	Acin1	chr14:54642161-54686931-
chr17	90454761	90455200	diffreps_peak_81267	1.09972	439	uc012ayr.1	Gm10493	1.46281	0.0794842	0.284459	up	UCSC_knowngene	1489	chr17:90454721-90456209+	intronic antisense	ENSMUST00000159778	Nrxn1	chr17:90036900-91092803-
chr4	126166930	126167100	diffreps_peak_125265	0.0445362	170	ENSMUST00000154702	Thrap3	1.01345	0.902534	1	up	Ensembl	609	chr4:126165555-126167476-	exon sense-overlapping	ENSMUST00000080919	Thrap3	chr4:126164082-126202760-
chr4	116595861	116596060	diffreps_peak_124218	7.12203	199	NR_029450	C530005A16Rik	17.2788	7.55033e-08	9.5617e-07	up	RefSeq	2436	chr4:116589733-116597630-	natural antisense	NM_029868	Gpbp1l1	chr4:116557727-116593882+
chr14	120388833	120388985	diffreps_peak_57817	0.279156	152	ENSMUST00000181685	Gm26679	1.07788	0.525828	1	up	Ensembl	1255	chr14:120384263-120388985-	natural antisense	NM_175341	Mbnl2	chr14:120275669-120431698+
chr10	81580641	81580880	diffreps_peak_19841	0.012465	239	ENSMUST00000129798	Tle2	1.00451	0.971706	1	up	Ensembl	4388	chr10:81575260-81590470+	exon sense-overlapping	NM_019725	Tle2	chr10:81575287-81590845+
chr13	66007841	66008220	diffreps_peak_47784	7.8028	379	ENSMUST00000069489	Gm6910	17.2326	1.57471e-08	3.2497e-07	up	Ensembl	1569	chr13:66007672-66009240+	intergenic
chr4	135331521	135331807	diffreps_peak_126646	1.29422	286	ENSMUST00000151251	Srrm1	1.30402	0.05079	0.197353	up	Ensembl	681	chr4:135331478-135338073-	exon sense-overlapping	ENSMUST00000136342	Srrm1	chr4:135321094-135353244-
chr11	75670275	75670480	diffreps_peak_29501	0.725569	205	ENSMUST00000155027	Myo1c	2.76781	0.188118	0.549519	up	Ensembl	642	chr11:75670276-75671727+	exon sense-overlapping	NM_008659	Myo1c	chr11:75651509-75674634+
chr8	122410621	122410985	diffreps_peak_177814	1.43894	364	ENSMUST00000177123	Zc3h18	1.64276	0.0363968	0.148613	up	Ensembl	4789	chr8:122407843-122417359+	exon sense-overlapping	ENSMUST00000017622	Zc3h18	chr8:122376609-122417359+
chr5	136249101	136249232	diffreps_peak_141796	0.160804	131	ENSMUST00000175918	Cux1	1.2874	0.690551	1	up	Ensembl	2489	chr5:136248586-136567278-	exon sense-overlapping	ENSMUST00000175998	Cux1	chr5:136248135-136360018-
chr1	162713021	162713240	diffreps_peak_10977	0.246663	219	ENSMUST00000182448	Prrc2c	1.0988	0.566678	1	up	Ensembl	1215	chr1:162712802-162714016-	exon sense-overlapping	ENSMUST00000182593	Prrc2c	chr1:162672889-162740481-
chr17	25783541	25783800	diffreps_peak_75229	2.05942	259	ENSMUST00000137587	Haghl	1.78133	0.00872124	0.0426886	up	Ensembl	1453	chr17:25782802-25785532-	natural antisense	NM_026238	Narfl	chr17:25773776-25783332+
chr7	127981241	127981440	diffreps_peak_166616	0.0398813	199	ENSMUST00000172755	Fus	1.00639	0.91226	1	up	Ensembl	670	chr7:127980216-127981829+	exon sense-overlapping	ENSMUST00000106251	Fus	chr7:127967457-127982368+
chrX	21362541	21362740	diffreps_peak_189556	0.301321	199	ENSMUST00000132683	Gm5124	1.3675	0.499665	1	up	Ensembl	2083	chrX:21360940-21363022+	intergenic
chr8	84713765	84714068	diffreps_peak_174983	1.75946	303	ENSMUST00000132236	Nfix	1.50386	0.0173995	0.0786415	up	Ensembl	347	chr8:84708634-84714068-	exon sense-overlapping	ENSMUST00000076715	Nfix	chr8:84708614-84800140-
chrX	146176461	146176577	diffreps_peak_196005	0.0892668	116	ENSMUST00000117548	Hmgb1-ps2	1.24891	0.814204	1	up	Ensembl	636	chrX:146175942-146176577+	intergenic
chr11	3143361	3143363	diffreps_peak_23430	0.365949	2	ENSMUST00000131021	Gm11399	1.42563	0.430577	0.946745	up	Ensembl	324	chr11:3142048-3143363+	natural antisense	ENSMUST00000101655	Sfi1	chr11:3131850-3189056-
chr6	119944700	119944800	diffreps_peak_151759	0.0707972	100	ENSMUST00000161802	Wnk1	1.02653	0.849577	1	up	Ensembl	845	chr6:119937615-119948105-	exon sense-overlapping	NM_001185021	Wnk1	chr6:119923969-120038655-
chr7	28816421	28816620	diffreps_peak_157381	0.0721484	199	ENSMUST00000173750	Hnrnpl	1.06517	0.846938	1	up	Ensembl	2275	chr7:28808806-28816960+	exon sense-overlapping	NM_177301	Hnrnpl	chr7:28810890-28822266+
chr16	4624521	4624780	diffreps_peak_66386	7.42737	259	ENSMUST00000127120	Glis2	16.9718	3.73794e-08	5.71942e-07	up	Ensembl	711	chr16:4611628-4624924+	natural antisense	ENSMUST00000014445	Pam16	chr16:4616464-4624988-
chr7	45091335	45091540	diffreps_peak_159250	1.17169	205	ENSMUST00000135689	Rcn3	3.74905	0.0673459	0.248134	up	Ensembl	381	chr7:45091336-45092123-	exon sense-overlapping	ENSMUST00000148175	Rcn3	chr7:45083605-45092185-
chr11	119943471	119943540	diffreps_peak_35284	0.0816937	69	ENSMUST00000146566	Baiap2	1.09167	0.828526	1	up	Ensembl	433	chr11:119943472-119981419+	exon sense-overlapping	NM_130862	Baiap2	chr11:119943092-120002618+
chr7	58837621	58837840	diffreps_peak_160514	1.58954	219	ENSMUST00000062150	Gm6226	16.7	0.0257312	0.110635	up	Ensembl	1134	chr7:58836805-58837938-	intergenic
chr2	30237779	30237980	diffreps_peak_94865	2.2114	201	ENSMUST00000063984	1700084E18Rik	1.36879	0.00614611	0.0311991	up	Ensembl	729	chr2:30237493-30238223-	natural antisense	NM_177725	Lrrc8a	chr2:30237769-30263790+
chrX	7639760	7639920	diffreps_peak_188709	0.764065	160	ENSMUST00000137515	Syp	1.4111	0.172161	0.514331	up	Ensembl	430	chrX:7639761-7644242+	exon sense-overlapping	ENSMUST00000128890	Syp	chrX:7638722-7644294+
chr9	72985081	72985382	diffreps_peak_184520	7.1947	301	ENSMUST00000184123	Gm5918	16.6014	6.38709e-08	8.43569e-07	up	Ensembl	1929	chr9:72983454-72985382-	exon sense-overlapping	ENSMUST00000124565	Gm5918	chr9:72979722-72985376-
chr3	95944241	95944361	diffreps_peak_112705	0.0207259	120	ENSMUST00000168471	Anp32e	1.09118	0.953398	1	up	Ensembl	502	chr3:95944204-95945523+	exon sense-overlapping	NM_001253757	Anp32e	chr3:95929257-95947387+
chr1	172278534	172278994	diffreps_peak_11642	2.36904	460	ENSMUST00000131751	Atp1a2	1.48935	0.00427525	0.0224492	up	Ensembl	3583	chr1:172274543-172298064-	exon sense-overlapping	ENSMUST00000137679	Atp1a2	chr1:172284309-172298064-
chr8	25564261	25564484	diffreps_peak_170155	6.90174	223	ENSMUST00000126118	Fgfr1	16.5731	1.25389e-07	1.42747e-06	up	Ensembl	3332	chr8:25563405-25574785+	exon sense-overlapping	ENSMUST00000179592	Fgfr1	chr8:25518772-25575714+
chr7	79531881	79532120	diffreps_peak_162192	0.438762	239	NR_040311	AI854517	1.22475	0.364114	0.856835	up	RefSeq	3741	chr7:79500026-79534403+	intergenic
chr6	24522781	24522866	diffreps_peak_144831	0.0539707	85	ENSMUST00000132588	Ndufa5	1.03497	0.88314	1	up	Ensembl	433	chr6:24518666-24522866-	exon sense-overlapping	ENSMUST00000118558	Ndufa5	chr6:24518666-24527570-
chr3	89340054	89340352	diffreps_peak_112089	2.12526	298	ENSMUST00000139705	Adam15	1.54722	0.0074944	0.037259	up	Ensembl	507	chr3:89339745-89340352-	exon sense-overlapping	ENSMUST00000074582	Adam15	chr3:89339648-89349975-
chr10	75590141	75590560	diffreps_peak_18178	6.88492	419	ENSMUST00000044101	Gm9985	16.552	1.30342e-07	1.47395e-06	up	Ensembl	510	chr10:75590142-75590653-	intronic antisense	NM_011820	Ggt5	chr10:75589381-75616968+
chr11	81865961	81866200	diffreps_peak_30469	0.203886	239	ENSMUST00000126433	5530401A14Rik	1.37782	0.625337	1	up	Ensembl	3654	chr11:81860673-81866416+	exon sense-overlapping	ENSMUST00000021044	5530401A14Rik	chr11:81860679-81894582+
chr2	80838661	80838762	diffreps_peak_98456	0.136125	101	ENSMUST00000081067	Gm4735	1.35941	0.730928	1	up	Ensembl	1636	chr2:80837127-80838762+	intergenic
chr4	41770241	41770269	diffreps_peak_118891	7.06409	28	ENSMUST00000151909	Ccl27a	16.4134	8.62808e-08	1.05888e-06	up	Ensembl	614	chr4:41769467-41770269-	natural antisense	NM_001172054	Il11ra1	chr4:41760443-41769473+
chr11	4904141	4904400	diffreps_peak_23789	0.820855	259	ENSMUST00000148117	Thoc5	1.57723	0.151059	0.465971	up	Ensembl	592	chr11:4902212-4904465+	exon sense-overlapping	ENSMUST00000142543	Thoc5	chr11:4902212-4918225+
chr10	79977962	79978480	diffreps_peak_18898	0.548475	518	ENSMUST00000124889	Tmem259	1.50112	0.282829	0.728278	up	Ensembl	727	chr10:79977963-79978776-	exon sense-overlapping	ENSMUST00000052885	Tmem259	chr10:79977118-79984330-
chr8	4202941	4203174	diffreps_peak_168052	0.104692	233	ENSMUST00000176764	Evi5l	1.1515	0.785792	1	up	Ensembl	4058	chr8:4166587-4208046+	exon sense-overlapping	ENSMUST00000176645	Evi5l	chr8:4206249-4211257+
chr5	14520801	14521060	diffreps_peak_130541	0.143543	259	ENSMUST00000182496	Gm26918	1.04495	0.71855	1	up	Ensembl	728	chr5:14520673-14539852-	natural antisense	ENSMUST00000030691	Pclo	chr5:14514918-14859115+
chr8	123104781	123105160	diffreps_peak_177961	0.878151	379	ENSMUST00000129311	Rpl13	1.20636	0.132388	0.420923	up	Ensembl	1969	chr8:123102653-123105244+	exon sense-overlapping	NM_016738	Rpl13	chr8:123102350-123105242+
chr17	27842041	27842240	diffreps_peak_75764	7.27041	199	ENSMUST00000137581	Snrpc	16.3808	5.36526e-08	7.41512e-07	up	Ensembl	6057	chr17:27840134-27851968+	exon sense-overlapping	NM_011432	Snrpc	chr17:27840087-27851967+
chr11	4177547	4177760	diffreps_peak_23722	2.79335	213	ENSMUST00000133095	Sf3a1	1.61549	0.00160933	0.00919107	up	Ensembl	846	chr11:4177548-4179419+	exon sense-overlapping	ENSMUST00000002198	Sf3a1	chr11:4160350-4182541+
chr3	75878645	75878980	diffreps_peak_111156	2.66626	335	ENSMUST00000134219	Golim4	1.96055	0.00215645	0.0120292	up	Ensembl	2062	chr3:75876479-75879008-	exon sense-overlapping	ENSMUST00000167078	Golim4	chr3:75877659-75956937-
chr4	43003226	43003460	diffreps_peak_119536	7.04156	234	ENSMUST00000148018	Fancg	16.0534	9.0875e-08	1.10301e-06	up	Ensembl	877	chr4:43002922-43003932-	exon sense-overlapping	NM_053081	Fancg	chr4:43002337-43010301-
chr1	89016281	89016372	diffreps_peak_6032	8.12439	91	NR_040471	1700067G17Rik	15.9358	7.5095e-09	2.24108e-07	up	RefSeq	603	chr1:89016113-89022210+	intergenic
chr7	29324081	29324460	diffreps_peak_157544	0.418464	379	ENSMUST00000182829	Sipa1l3	1.73033	0.381536	0.88216	up	Ensembl	6385	chr7:29323426-29341868-	exon sense-overlapping	NM_001081028	Sipa1l3	chr7:29320378-29505460-
chr15	83614863	83615031	diffreps_peak_64011	0.501121	168	ENSMUST00000144773	Scube1	1.23389	0.315413	0.781706	up	Ensembl	5840	chr15:83604999-83725021-	exon sense-overlapping	NM_022723	Scube1	chr15:83602583-83725039-
chr11	120237101	120237284	diffreps_peak_35409	0.16782	183	ENSMUST00000142439	Bahcc1	1.25128	0.679485	1	up	Ensembl	625	chr11:120236445-120237284+	exon sense-overlapping	NM_198423	Bahcc1	chr11:120232947-120292297+
chr4	147931701	147931847	diffreps_peak_128302	0.040403	146	ENSMUST00000132075	Plod1	1.01726	0.911165	1	up	Ensembl	358	chr4:147931689-147936708-	exon sense-overlapping	NM_011122	Plod1	chr4:147909753-147936776-
chr2	66545539	66545780	diffreps_peak_97664	0.0480341	241	NR_033495	Gm13629	1.04108	0.895294	1	up	RefSeq	1347	chr2:66440880-66547472+	natural antisense	ENSMUST00000112354	Scn9a	chr2:66483117-66568312-
chr7	140881701	140881960	diffreps_peak_167264	0.294898	259	uc029wpl.1	AK165407	2.2167	0.507109	1	up	UCSC_knowngene	1223	chr7:140881074-140882296-	exon sense-overlapping	ENSMUST00000106048	Sirt3	chr7:140863670-140881869-
chr2	181570721	181571100	diffreps_peak_106739	7.32877	379	ENSMUST00000124315	Uckl1	15.8247	4.69061e-08	6.71453e-07	up	Ensembl	1196	chr2:181569764-181571375-	exon sense-overlapping	NM_026765	Uckl1	chr2:181569153-181581973-
chr6	54429541	54430140	diffreps_peak_146903	2.84506	599	NR_033635	9130019P16Rik	1.39555	0.0014287	0.00824016	up	RefSeq	4486	chr6:54269681-54430221-	natural antisense	NM_023543	Chn2	chr6:54272822-54301812+
chr7	30959321	30959520	diffreps_peak_157866	7.44121	199	uc009ghi.1	AK154275	15.5686	3.62067e-08	5.5952e-07	up	UCSC_knowngene	3660	chr7:30957409-30961619+	natural antisense	ENSMUST00000098553	Lsr	chr7:30957781-30973407-
chr4	145646770	145647115	diffreps_peak_128077	7.25524	345	ENSMUST00000177803	Gm13249	15.1515	5.55592e-08	7.60653e-07	up	Ensembl	345	chr4:145646771-145647115-	intergenic
chr16	17641701	17641900	diffreps_peak_67762	0.111121	199	ENSMUST00000166091	Smpd4	1.13907	0.774246	1	up	Ensembl	2446	chr16:17619381-17642148+	exon sense-overlapping	ENSMUST00000170996	Smpd4	chr16:17621487-17642803+
chr16	13838061	13838192	diffreps_peak_67405	0.237881	131	ENSMUST00000148848	Pdxdc1	1.18678	0.578255	1	up	Ensembl	620	chr16:13837633-13838361-	exon sense-overlapping	NM_053181	Pdxdc1	chr16:13835700-13903145-
chr5	113772817	113773096	diffreps_peak_138168	0.365626	279	ENSMUST00000123616	Iscu	1.63806	0.430898	0.94711	up	Ensembl	773	chr5:113772818-113777039+	exon sense-overlapping	ENSMUST00000112311	Iscu	chr5:113772803-113777798+
chr17	34030089	34030421	diffreps_peak_76541	0.300252	332	ENSMUST00000167145	Slc39a7	1.10042	0.500896	1	up	Ensembl	844	chr17:34029846-34031028-	exon sense-overlapping	ENSMUST00000025186	Slc39a7	chr17:34028269-34031544-
chr4	148547603	148547740	diffreps_peak_128412	7.32468	137	ENSMUST00000129715	Mtor	15.0606	4.73496e-08	6.76063e-07	up	Ensembl	598	chr4:148544413-148547788+	exon sense-overlapping	ENSMUST00000103221	Mtor	chr4:148448611-148557683+
chr7	44469982	44470172	diffreps_peak_158877	0.0835707	190	ENSMUST00000136679	Josd2	1.02033	0.824953	1	up	Ensembl	613	chr7:44468089-44470488+	exon sense-overlapping	NM_001205073	Josd2	chr7:44467980-44471658+
chr3	84191801	84192220	diffreps_peak_111540	0.19788	419	ENSMUST00000128574	Trim2	1.11668	0.634044	1	up	Ensembl	4734	chr3:84163707-84220845-	exon sense-overlapping	ENSMUST00000132283	Trim2	chr3:84192211-84305446-
chr5	146575901	146576100	diffreps_peak_143281	0.0262393	199	ENSMUST00000178171	Gm8494	1.02263	0.941371	1	up	Ensembl	930	chr5:146575194-146576123+	intergenic
chr15	83117401	83117747	diffreps_peak_63910	0.558314	346	ENSMUST00000167589	Rrp7a	1.58402	0.276494	0.717116	up	Ensembl	792	chr15:83117226-83118346-	exon sense-overlapping	NM_029101	Rrp7a	chr15:83115846-83122801-
chr7	25761368	25761564	diffreps_peak_156856	6.83327	196	ENSMUST00000137211	Axl	14.5983	1.46803e-07	1.62529e-06	up	Ensembl	777	chr7:25761369-25764413-	exon sense-overlapping	NM_009465	Axl	chr7:25756500-25788733-
chr9	112155601	112155800	diffreps_peak_187438	0.250129	199	ENSMUST00000159432	Arpp21	1.07646	0.562174	1	up	Ensembl	5320	chr9:112065236-112234423-	exon sense-overlapping	ENSMUST00000160240	Arpp21	chr9:112065091-112185726-
chr3	108938161	108938238	diffreps_peak_113923	7.03859	77	ENSMUST00000141723	Gm12521	14.5121	9.14974e-08	1.10896e-06	up	Ensembl	694	chr3:108936823-108938238-	intergenic
chr11	75159781	75159955	diffreps_peak_29398	7.14641	174	uc007kdb.1	BC127131	14.1452	7.13828e-08	9.18325e-07	up	UCSC_knowngene	259	chr11:75159697-75159955-	natural antisense	NM_001002764	Smg6	chr11:74925872-75164448+
chr9	112155821	112156220	diffreps_peak_187442	1.00588	399	ENSMUST00000159432	Arpp21	1.17216	0.0986562	0.338396	up	Ensembl	5320	chr9:112065236-112234423-	exon sense-overlapping	ENSMUST00000070218	Arpp21	chr9:112065091-112185949-
chr7	3636661	3636820	diffreps_peak_154017	0.465891	159	ENSMUST00000125782	Prpf31	1.86735	0.342066	0.823284	up	Ensembl	2731	chr7:3630059-3637057+	exon sense-overlapping	ENSMUST00000008517	Prpf31	chr7:3629985-3642486+
chr7	16280857	16281000	diffreps_peak_155333	0.229178	143	ENSMUST00000129447	Ccdc9	1.146	0.589959	1	up	Ensembl	748	chr7:16276594-16281166-	exon sense-overlapping	NM_172297	Ccdc9	chr7:16275464-16284659-
chr5	37390001	37390280	diffreps_peak_133075	7.45928	279	ENSMUST00000159915	Evc2	14.1411	3.47309e-08	5.42497e-07	up	Ensembl	728	chr5:37389904-37392022+	exon sense-overlapping	ENSMUST00000056365	Evc2	chr5:37338499-37425055+
chr4	132830601	132830769	diffreps_peak_126233	0.34659	168	ENSMUST00000131725	Ppp1r8	1.47927	0.450204	0.971496	up	Ensembl	883	chr4:132830391-132843124-	exon sense-overlapping	NM_146154	Ppp1r8	chr4:132826924-132843169-
chr10	94147952	94148240	diffreps_peak_20639	8.04357	288	uc007gvn.1	AK029258	13.9742	9.04542e-09	2.40777e-07	up	UCSC_knowngene	3138	chr10:94147953-94151090+	exon sense-overlapping	NM_011629	Nr2c1	chr10:94147931-94197214+
chr14	54644321	54644536	diffreps_peak_53950	0.131142	215	ENSMUST00000152773	Acin1	1.23771	0.739364	1	up	Ensembl	844	chr14:54642902-54644536-	exon sense-overlapping	ENSMUST00000147714	Acin1	chr14:54642162-54686616-
chr2	180582725	180583040	diffreps_peak_106596	0.152322	315	ENSMUST00000130277	Mrgbp	1.08001	0.704171	1	up	Ensembl	3150	chr2:180582726-180586304+	exon sense-overlapping	ENSMUST00000169630	Mrgbp	chr2:180581304-180585634+
chr1	180229380	180229487	diffreps_peak_12209	7.42045	107	ENSMUST00000136291	Psen2	13.9332	3.79797e-08	5.78454e-07	up	Ensembl	659	chr1:180227389-180230062-	exon sense-overlapping	NM_001128605	Psen2	chr1:180227004-180256300-
chr2	22590301	22590533	diffreps_peak_93739	0.0352474	232	ENSMUST00000120651	Gm13339	1.04391	0.922046	1	up	Ensembl	510	chr2:22590024-22590533-	intronic antisense	ENSMUST00000138863	Myo3a	chr2:22558215-22618247+
chr11	69340721	69341058	diffreps_peak_28438	0.366796	337	ENSMUST00000129321	A030009H04Rik	1.3984	0.429739	0.945734	up	Ensembl	2081	chr11:69340461-69342641+	intergenic
chr10	4407961	4408105	diffreps_peak_13137	7.46499	144	ENSMUST00000140660	Rmnd1	13.899	3.42772e-08	5.38225e-07	up	Ensembl	749	chr10:4403171-4408105-	exon sense-overlapping	NM_025343	Rmnd1	chr10:4403169-4432352-
chr7	126795911	126796124	diffreps_peak_166093	4.96921	213	ENSMUST00000135707	Aldoa	1.22191	1.07347e-05	8.26602e-05	up	Ensembl	945	chr7:126795912-126798282-	exon sense-overlapping	ENSMUST00000106348	Aldoa	chr7:126795235-126800447-
chr6	54489007	54489180	diffreps_peak_146934	1.49318	173	ENSMUST00000131043	Wipf3	1.40305	0.0321233	0.133589	up	Ensembl	2660	chr6:54487906-54491542+	exon sense-overlapping	ENSMUST00000132855	Wipf3	chr6:54429603-54503765+
chr4	148260501	148260751	diffreps_peak_128353	8.84584	250	ENSMUST00000143851	Ptchd2	13.8709	1.42614e-09	1.60662e-07	up	Ensembl	595	chr4:148258216-148260751-	exon sense-overlapping	ENSMUST00000047720	Ptchd2	chr4:148240264-148287965-
chr7	29169441	29169660	diffreps_peak_157488	0.0460419	219	uc009gay.1	Spred3	1.0947	0.899411	1	up	UCSC_knowngene	759	chr7:29166527-29169841-	exon sense-overlapping	ENSMUST00000048923	Spred3	chr7:29158829-29168647-
chr7	79531941	79532220	diffreps_peak_162193	0.287134	279	NR_040311	AI854517	1.31479	0.516257	1	up	RefSeq	3741	chr7:79500026-79534403+	intergenic
chr10	69990901	69991300	diffreps_peak_17649	0.69375	399	uc007fnn.1	Ank3	1.22196	0.202418	0.579864	up	UCSC_knowngene	7274	chr10:69989935-70027436+	exon sense-overlapping	ENSMUST00000182439	Ank3	chr10:69534208-70023866+
chr2	92422812	92423000	diffreps_peak_99331	0.193701	188	NR_040621	D930015M05Rik	1.23806	0.640175	1	up	RefSeq	1190	chr2:92408892-92432308+	natural antisense	ENSMUST00000111278	Cry2	chr2:92411260-92434036-
chr15	79932561	79932760	diffreps_peak_63383	0.182336	199	ENSMUST00000176639	Cbx7	1.28607	0.65715	1	up	Ensembl	6057	chr15:79915813-79932768-	exon sense-overlapping	ENSMUST00000177044	Cbx7	chr15:79918921-79932516-
chrX	142632966	142633135	diffreps_peak_195763	7.09246	169	ENSMUST00000061991	Gm5763	13.7575	8.08235e-08	1.00684e-06	up	Ensembl	1599	chrX:142631483-142633135-	intergenic
chr10	41485641	41485940	diffreps_peak_15829	1.49232	299	ENSMUST00000126833	Smpd2	1.87434	0.0321867	0.133782	up	Ensembl	4150	chr10:41485642-41490330-	exon sense-overlapping	NM_009213	Smpd2	chr10:41487172-41490340-
chr7	105381398	105381640	diffreps_peak_164348	0.0811281	242	ENSMUST00000142559	Fam160a2	1.15177	0.829606	1	up	Ensembl	800	chr7:105379076-105381981-	exon sense-overlapping	ENSMUST00000118726	Fam160a2	chr7:105378611-105400008-
chr2	180176001	180176240	diffreps_peak_106583	0.222217	239	ENSMUST00000128029	Adrm1	1.10797	0.599491	1	up	Ensembl	2576	chr2:180171606-180176284+	exon sense-overlapping	NM_019822	Adrm1	chr2:180171588-180176283+
chr14	54644996	54645356	diffreps_peak_53954	0.50057	360	ENSMUST00000133706	Acin1	1.18853	0.315813	0.782407	up	Ensembl	803	chr14:54644997-54646047-	exon sense-overlapping	ENSMUST00000147714	Acin1	chr14:54642162-54686616-
chr1	36701671	36701780	diffreps_peak_2397	0.240152	109	ENSMUST00000162684	Actr1b	1.13516	0.575239	1	up	Ensembl	587	chr1:36701672-36702549-	exon sense-overlapping	ENSMUST00000160084	Actr1b	chr1:36701784-36714422-
chr2	177892861	177893060	diffreps_peak_106312	7.46711	199	ENSMUST00000122418	Gm14323	13.7174	3.4111e-08	5.36612e-07	up	Ensembl	627	chr2:177892638-177893264+	intergenic
chr7	42125199	42125240	diffreps_peak_158564	4.08041	41	ENSMUST00000166539	Gm2308	13.6818	8.30981e-05	0.000574217	up	Ensembl	1004	chr7:42125200-42126203-	intronic antisense	NM_001105057	Vmn2r60	chr7:42116471-42195776+
chr5	81020421	81020820	diffreps_peak_135623	0.145396	399	ENSMUST00000147226	Lphn3	1.0958	0.715491	1	up	Ensembl	2728	chr5:81020138-81388784+	exon sense-overlapping	ENSMUST00000120445	Lphn3	chr5:81309874-81795347+
chr15	76446515	76446700	diffreps_peak_62519	0.314754	185	ENSMUST00000160986	Mroh1	1.52308	0.484447	1	up	Ensembl	9830	chr15:76380523-76453035+	exon sense-overlapping	ENSMUST00000160631	Mroh1	chr15:76428657-76433909+
chr2	166960022	166960200	diffreps_peak_105227	0.304639	178	ENSMUST00000154506	Stau1	1.23877	0.495862	1	up	Ensembl	826	chr2:166952304-166960322-	exon sense-overlapping	NM_001109906	Stau1	chr2:166947549-166996299-
chr12	83663701	83664060	diffreps_peak_40674	0.00996153	359	uc007odn.1	Rbm25	1.00186	0.977324	1	up	UCSC_knowngene	2949	chr12:83661618-83668508+	exon sense-overlapping	ENSMUST00000181983	Rbm25	chr12:83631236-83674417+
chr17	46409181	46409361	diffreps_peak_77763	0.977158	180	ENSMUST00000123733	Zfp318	1.43027	0.1054	0.356585	up	Ensembl	573	chr17:46405855-46409361+	exon sense-overlapping	NM_207671	Zfp318	chr17:46383766-46420918+
chr3	94864021	94864220	diffreps_peak_112537	0.0551733	199	ENSMUST00000132544	Pogz	1.0648	0.880697	1	up	Ensembl	744	chr3:94863728-94864550+	exon sense-overlapping	ENSMUST00000042402	Pogz	chr3:94837713-94880875+
chr10	80300846	80301240	diffreps_peak_19030	1.30913	394	ENSMUST00000140658	Apc2	1.85516	0.0490762	0.1916	up	Ensembl	2351	chr10:80300847-80303355+	exon sense-overlapping	ENSMUST00000020349	Apc2	chr10:80301820-80318256+
chr2	181680309	181680500	diffreps_peak_106776	0.126103	191	ENSMUST00000129686	Tcea2	1.24526	0.747992	1	up	Ensembl	2167	chr2:181680310-181687347+	exon sense-overlapping	ENSMUST00000129006	Tcea2	chr2:181682885-181688045+
chr1	34164981	34165360	diffreps_peak_2114	1.11716	379	ENSMUST00000182335	Dst	1.57078	0.0763552	0.275113	up	Ensembl	3478	chr1:34161924-34165401+	exon sense-overlapping	ENSMUST00000097786	Dst	chr1:34011825-34308652+
chr2	91261510	91261669	diffreps_peak_99113	0.629448	159	ENSMUST00000126754	Pacsin3	1.38244	0.234721	0.645746	up	Ensembl	761	chr2:91260805-91261669+	exon sense-overlapping	ENSMUST00000131711	Pacsin3	chr2:91257335-91261301+
chr12	54862990	54863109	diffreps_peak_38664	7.24139	119	uc007nny.1	AK006973	13.5884	5.73607e-08	7.78114e-07	up	UCSC_knowngene	507	chr12:54862991-54863664+	bidirectional	NM_007688	Cfl2	chr12:54858819-54862877-
chr1	178149841	178149962	diffreps_peak_12066	0.116009	121	uc011wxj.1	Gm16432	1.1635	0.765581	1	up	UCSC_knowngene	3033	chr1:177983423-178149962+	exon sense-overlapping	ENSMUST00000094273	Gm16432	chr1:177991435-178048291+
chr10	81122361	81122612	diffreps_peak_19430	0.0957007	251	ENSMUST00000123241	Map2k2	1.06824	0.802231	1	up	Ensembl	761	chr10:81122160-81123927+	exon sense-overlapping	ENSMUST00000105331	Map2k2	chr10:81105947-81123883+
chr10	81316941	81317140	diffreps_peak_19624	7.35152	199	ENSMUST00000159636	Pip5k1c	13.5839	4.4512e-08	6.469e-07	up	Ensembl	810	chr10:81316842-81318013+	exon sense-overlapping	NM_001293647	Pip5k1c	chr10:81292963-81319974+
chr6	149409601	149409800	diffreps_peak_153837	0.387115	199	uc009euf.1	AK050809	1.18605	0.410095	0.919652	up	UCSC_knowngene	3251	chr6:149408886-149412136+	exon sense-overlapping	ENSMUST00000111513	Bicd1	chr6:149409016-149557819+
chr7	126373769	126374180	diffreps_peak_165959	6.83838	411	ENSMUST00000126810	Spns1	13.572	1.45083e-07	1.60952e-06	up	Ensembl	3251	chr7:126370067-126377411-	exon sense-overlapping	NM_023712	Spns1	chr7:126370060-126377934-
chr5	121810701	121810996	diffreps_peak_139588	1.12829	295	ENSMUST00000161836	Atxn2	1.3168	0.074423	0.269321	up	Ensembl	482	chr5:121810664-121811533+	exon sense-overlapping	ENSMUST00000161064	Atxn2	chr5:121749196-121814949+
chrX	52052481	52052537	diffreps_peak_190945	0.0288418	56	uc009tee.1	AK086914	1.02483	0.935746	1	up	UCSC_knowngene	1647	chrX:52050891-52052537-	intergenic
chr4	40723481	40723720	diffreps_peak_118690	0.403483	239	ENSMUST00000126020	Dnaja1	1.38968	0.394928	0.899356	up	Ensembl	622	chr4:40723362-40724111+	exon sense-overlapping	ENSMUST00000030118	Dnaja1	chr4:40722480-40734964+
chr4	155885564	155885740	diffreps_peak_129671	0.24288	176	ENSMUST00000134678	Cpsf3l	1.10591	0.571636	1	up	Ensembl	2197	chr4:155869546-155888699+	exon sense-overlapping	ENSMUST00000030901	Cpsf3l	chr4:155869546-155889103+
chr17	37064659	37064760	diffreps_peak_77145	1.15389	101	ENSMUST00000174181	Gabbr1	1.27789	0.0701632	0.256769	up	Ensembl	608	chr17:37062984-37064857+	exon sense-overlapping	NM_019439	Gabbr1	chr17:37045966-37074305+
chr13	55003121	55003416	diffreps_peak_46901	0.33906	295	ENSMUST00000142906	Unc5a	1.12087	0.458078	0.980506	up	Ensembl	898	chr13:55003010-55004653+	exon sense-overlapping	ENSMUST00000109994	Unc5a	chr13:54949411-55006018+
chr6	113111201	113111536	diffreps_peak_150833	1.98671	335	ENSMUST00000124467	Setd5	1.63724	0.0103107	0.0496027	up	Ensembl	3848	chr6:113108873-113117931+	exon sense-overlapping	ENSMUST00000113157	Setd5	chr6:113077639-113153424+
chr4	40775161	40775420	diffreps_peak_118691	7.28917	259	ENSMUST00000178609	Gm12396	13.4949	5.13842e-08	7.18346e-07	up	Ensembl	593	chr4:40775133-40775725-	intergenic
chr3	84191221	84191420	diffreps_peak_111538	0.101221	199	ENSMUST00000128574	Trim2	1.07743	0.792098	1	up	Ensembl	4734	chr3:84163707-84220845-	exon sense-overlapping	NM_001271726	Trim2	chr3:84160439-84304775-
chr4	147277981	147278200	diffreps_peak_128192	0.91757	219	ENSMUST00000117628	Gm13135	3.25	0.120901	0.395407	up	Ensembl	3121	chr4:147275976-147279096+	intron sense-overlapping	NM_001039209	Gm13152	chr4:147175866-147513420+
chr8	71667701	71667900	diffreps_peak_173732	0.318558	199	ENSMUST00000175780	Unc13a	1.56811	0.480221	1	up	Ensembl	2569	chr8:71660346-71668082-	exon sense-overlapping	NM_001029873	Unc13a	chr8:71626712-71671757-
chr7	126663792	126664004	diffreps_peak_166053	7.67829	212	ENSMUST00000138794	Ccdc101	13.3887	2.09754e-08	3.88672e-07	up	Ensembl	285	chr7:126663793-126664988+	exon sense-overlapping	ENSMUST00000032956	Ccdc101	chr7:126649309-126672925+
chr13	98402621	98402840	diffreps_peak_49429	0.715953	219	ENSMUST00000182798	Gm2445	2.07092	0.19233	0.558671	up	Ensembl	989	chr13:98402095-98403083-	intergenic
chr6	120966053	120966118	diffreps_peak_151888	7.13622	65	ENSMUST00000124669	Mical3	13.3199	7.30768e-08	9.33743e-07	up	Ensembl	433	chr6:120960012-120966118-	exon sense-overlapping	NM_001270475	Mical3	chr6:120931546-121131022-
chr3	95231901	95232180	diffreps_peak_112622	0.25601	279	ENSMUST00000149804	Cdc42se1	1.5868	0.554613	1	up	Ensembl	653	chr3:95228810-95232381+	exon sense-overlapping	ENSMUST00000107201	Cdc42se1	chr3:95228952-95234582+
chr4	130336855	130336944	diffreps_peak_126002	0.0301878	89	ENSMUST00000129840	Zcchc17	1.04834	0.932851	1	up	Ensembl	286	chr4:130336856-130338584-	exon sense-overlapping	ENSMUST00000134159	Zcchc17	chr4:130315383-130359943-
chr7	44553721	44553923	diffreps_peak_158939	0.0188287	202	ENSMUST00000128600	Nr1h2	1.02021	0.957572	1	up	Ensembl	530	chr7:44552494-44553923-	exon sense-overlapping	ENSMUST00000167197	Nr1h2	chr7:44549652-44553923-
chr19	26607269	26607520	diffreps_peak_89583	0.0509225	251	ENSMUST00000099537	Smarca2	1.04587	0.88936	1	up	Ensembl	5913	chr19:26607270-26778273+	exon sense-overlapping	ENSMUST00000177116	Smarca2	chr19:26753600-26777651+
chr18	39246601	39246840	diffreps_peak_83942	0.938944	239	ENSMUST00000128894	Gm15336	1.9128	0.115095	0.380693	up	Ensembl	1571	chr18:39246247-39302690-	natural antisense	NM_175164	Arhgap26	chr18:38993145-39376285+
chr1	36706869	36707167	diffreps_peak_2402	0.290196	298	ENSMUST00000160043	Actr1b	1.5025	0.51263	1	up	Ensembl	417	chr1:36702482-36707167-	exon sense-overlapping	NM_146107	Actr1b	chr1:36699202-36709925-
chr10	69993544	69993580	diffreps_peak_17662	0.0405995	36	uc007fnn.1	Ank3	1.05364	0.910753	1	up	UCSC_knowngene	7274	chr10:69989935-70027436+	exon sense-overlapping	ENSMUST00000183261	Ank3	chr10:69925773-70024882+
chr3	103745155	103745380	diffreps_peak_113331	0.518642	225	NR_125731	Hipk1	1.85977	0.302941	0.761109	up	RefSeq	3546	chr3:103745156-103791561-	exon sense-overlapping	ENSMUST00000106845	Hipk1	chr3:103743562-103791075-
chr11	70664987	70665300	diffreps_peak_28922	0.550616	313	ENSMUST00000124691	Spag7	1.46702	0.281439	0.725875	up	Ensembl	772	chr11:70664340-70669279-	exon sense-overlapping	NM_172561	Spag7	chr11:70663769-70669416-
chr2	91934361	91934581	diffreps_peak_99207	0.369438	220	ENSMUST00000138894	Dgkz	1.49353	0.427132	0.942184	up	Ensembl	905	chr2:91933384-91934581-	exon sense-overlapping	NM_001166597	Dgkz	chr2:91932827-91950348-
chr2	155279821	155280020	diffreps_peak_103628	0.00892834	199	ENSMUST00000139854	Pigu	1.03371	0.979652	1	up	Ensembl	5497	chr2:155278243-155301302-	exon sense-overlapping	ENSMUST00000165234	Pigu	chr2:155278244-155357424-
chr10	81409574	81409765	diffreps_peak_19703	0.713129	191	ENSMUST00000156260	Gm16104	1.52308	0.193585	0.56143	up	Ensembl	401	chr10:81409575-81411579+	natural antisense	NM_008688	Nfic	chr10:81396191-81427173-
chr9	21678001	21678096	diffreps_peak_180145	0.724122	95	ENSMUST00000184017	uc_338	1.88956	0.188746	0.550867	up	Ensembl	184	chr9:21677913-21678096+	intron sense-overlapping	NM_011417	Smarca4	chr9:21616169-21704230+
chr3	88452830	88453131	diffreps_peak_111814	1.01889	301	ENSMUST00000184972	Sema4a	2.46526	0.0957433	0.330202	up	Ensembl	465	chr3:88452831-88454842-	exon sense-overlapping	ENSMUST00000123753	Sema4a	chr3:88454765-88456436-
chr19	4232437	4232440	diffreps_peak_87267	7.07666	3	uc008fzn.2	Pold4	13.2934	8.38185e-08	1.03494e-06	up	UCSC_knowngene	648	chr19:4232438-4233634+	exon sense-overlapping	ENSMUST00000025773	Pold4	chr19:4231899-4233631+
chr2	160840835	160841100	diffreps_peak_104455	6.95878	265	ENSMUST00000142212	Gm16751	12.9403	1.09957e-07	1.2852e-06	up	Ensembl	1685	chr2:160840836-160888028-	intron sense-overlapping	ENSMUST00000103112	Zhx3	chr2:160765782-160859631-
chr7	100760804	100761020	diffreps_peak_163907	6.75979	216	ENSMUST00000181493	Gm3200	12.7812	1.73866e-07	1.87205e-06	up	Ensembl	1002	chr7:100760805-100761806-	intronic antisense	ENSMUST00000049053	Fam168a	chr7:100706702-100841628+
chr5	143767061	143767130	diffreps_peak_142928	0.100769	69	ENSMUST00000180460	D130017N08Rik	1.17656	0.792922	1	up	Ensembl	510	chr5:143759862-143767130+	intergenic
chr3	108907541	108907847	diffreps_peak_113915	0.133544	306	ENSMUST00000145720	Prpf38b	1.06329	0.735286	1	up	Ensembl	2108	chr3:108906561-108911710-	exon sense-overlapping	ENSMUST00000029480	Prpf38b	chr3:108902807-108911727-
chr11	5780481	5780680	diffreps_peak_23946	0.0693416	199	uc007hwz.1	2210015D19Rik	1.0917	0.852429	1	up	UCSC_knowngene	1825	chr11:5762150-5781876+	natural antisense	ENSMUST00000120306	Urgcp	chr11:5714971-5762371-
chr11	102205281	102205600	diffreps_peak_32821	0.0404801	319	ENSMUST00000149087	Hdac5	1.01736	0.911003	1	up	Ensembl	5406	chr11:102195749-102218929-	exon sense-overlapping	ENSMUST00000131254	Hdac5	chr11:102206628-102218928-
chr2	152323041	152323680	diffreps_peak_103346	0.558798	639	ENSMUST00000128645	Rbck1	1.61357	0.276186	0.716522	up	Ensembl	1595	chr2:152322938-152324616-	exon sense-overlapping	ENSMUST00000144865	Rbck1	chr2:152318780-152324364-
chr5	24429301	24429578	diffreps_peak_131401	5.76042	277	ENSMUST00000155636	Slc4a2	1.85261	1.73612e-06	1.49476e-05	up	Ensembl	637	chr5:24429018-24429779+	exon sense-overlapping	NM_009207	Slc4a2	chr5:24425232-24440947+
chr2	164834029	164834320	diffreps_peak_104783	0.146951	291	ENSMUST00000130959	Ctsa	1.15271	0.712933	1	up	Ensembl	667	chr2:164834030-164835193+	exon sense-overlapping	ENSMUST00000127650	Ctsa	chr2:164832926-164835691+
chr11	60714601	60714721	diffreps_peak_27665	0.0608848	120	ENSMUST00000154141	Flii	1.04276	0.869191	1	up	Ensembl	458	chr11:60714123-60714721-	natural antisense	ENSMUST00000108719	Llgl1	chr11:60699845-60714186+
chr17	17831781	17831980	diffreps_peak_74417	0.0664794	199	ENSMUST00000178408	4930546H06Rik	1.01991	0.858066	1	up	Ensembl	1174	chr17:17830893-17832066+	exon sense-overlapping	ENSMUST00000150302	4930546H06Rik	chr17:17831444-17837723+
chr12	3749288	3749583	diffreps_peak_35833	0.750832	295	ENSMUST00000172504	Dtnb	1.34702	0.177488	0.526353	up	Ensembl	715	chr12:3749289-3781142+	exon sense-overlapping	ENSMUST00000077930	Dtnb	chr12:3572984-3781391+
chr2	121457741	121458043	diffreps_peak_101236	0.181601	302	ENSMUST00000131870	Hypk	1.1103	0.658263	1	up	Ensembl	724	chr2:121457124-121458306+	exon sense-overlapping	NM_026318	Hypk	chr2:121457088-121458440+
chr15	79832641	79832757	diffreps_peak_63365	0.262609	116	ENSMUST00000127721	Cbx6	1.09435	0.546249	1	up	Ensembl	546	chr15:79832572-79834325-	exon sense-overlapping	NM_028763	Cbx6	chr15:79823898-79834333-
chr4	155843058	155843200	diffreps_peak_129648	10.771	142	ENSMUST00000141766	Mxra8	12.6566	1.69446e-11	6.2831e-09	up	Ensembl	788	chr4:155842451-155843464+	exon sense-overlapping	NM_024263	Mxra8	chr4:155839680-155844102+
chr2	69736021	69736169	diffreps_peak_97835	1.40142	148	ENSMUST00000146234	Ppig	1.30103	0.0396811	0.159989	up	Ensembl	801	chr2:69723326-69736169+	exon sense-overlapping	ENSMUST00000090858	Ppig	chr2:69722805-69754012+
chr12	100948361	100948560	diffreps_peak_41747	0.00727583	199	ENSMUST00000180617	A630072L19Rik	1.03863	0.983386	1	up	Ensembl	3405	chr12:100941742-100949875+	natural antisense	ENSMUST00000085096	Ccdc88c	chr12:100912700-101028983-
chr7	30926835	30926925	diffreps_peak_157849	6.67006	90	uc009ghe.1	AK218399	12.493	2.13768e-07	2.2322e-06	up	UCSC_knowngene	173	chr7:30926672-30926925-	intergenic
chr5	110770948	110771262	diffreps_peak_137710	8.84118	314	ENSMUST00000132267	Gm15559	12.4753	1.44153e-09	1.60662e-07	up	Ensembl	2260	chr5:110770949-110779260+	intronic antisense	ENSMUST00000112426	Pus1	chr5:110773667-110779967-
chr7	63543841	63544040	diffreps_peak_161132	0.359839	199	ENSMUST00000121016	Gm5898	1.12923	0.436678	0.954557	up	Ensembl	2071	chr7:63542479-63544549+	intron sense-overlapping	NM_130880	Otud7a	chr7:63444772-63759027+
chr1	181187561	181187746	diffreps_peak_12289	0.904453	185	ENSMUST00000159625	Wdr26	1.84981	0.124608	0.401534	up	Ensembl	811	chr1:181187421-181192245-	exon sense-overlapping	ENSMUST00000162819	Wdr26	chr1:181173228-181211552-
chr10	63023221	63023640	diffreps_peak_17218	0.637504	419	uc007fjq.3	AK156477	2.89723	0.230407	0.637133	up	UCSC_knowngene	1294	chr10:63022545-63023838-	exon sense-overlapping	NM_001079824	Hnrnph3	chr10:63014664-63023849-
chr17	35089262	35089456	diffreps_peak_76748	0.361924	194	ENSMUST00000173134	Abhd16a	1.38216	0.434587	0.952135	up	Ensembl	574	chr17:35089263-35091826+	exon sense-overlapping	NM_178592	Abhd16a	chr17:35089291-35102987+
chr11	87781721	87781920	diffreps_peak_30897	0.00249652	199	ENSMUST00000148814	Bzrap1	1.00286	0.994268	1	up	Ensembl	2678	chr11:87778793-87785928+	exon sense-overlapping	ENSMUST00000100644	Bzrap1	chr11:87760587-87785928+
chr9	50684561	50684800	diffreps_peak_182706	0.678928	239	ENSMUST00000141919	Dixdc1	2.33165	0.209446	0.594696	up	Ensembl	6453	chr9:50662756-50699362-	exon sense-overlapping	ENSMUST00000117646	Dixdc1	chr9:50662756-50728067-
chr3	32365488	32365600	diffreps_peak_108797	0.316781	112	NR_027966	4930429B21Rik	1.24922	0.482191	1	up	RefSeq	1950	chr3:32365489-32367438+	natural antisense	NM_009517	Zmat3	chr3:32334794-32365665-
chr5	14522342	14522472	diffreps_peak_130555	0.190063	130	ENSMUST00000182496	Gm26918	1.06363	0.64556	1	up	Ensembl	728	chr5:14520673-14539852-	natural antisense	ENSMUST00000030691	Pclo	chr5:14514918-14859115+
chr14	121255381	121255595	diffreps_peak_57932	0.246559	214	ENSMUST00000137971	Farp1	1.14832	0.566814	1	up	Ensembl	961	chr14:121254908-121267921+	exon sense-overlapping	ENSMUST00000026635	Farp1	chr14:121035564-121283744+
chr7	27263881	27264480	diffreps_peak_156938	0.815631	599	ENSMUST00000149805	Numbl	2.42837	0.152886	0.470348	up	Ensembl	8511	chr7:27258806-27282144+	exon sense-overlapping	NM_010950	Numbl	chr7:27258761-27282150+
chr16	32643873	32643940	diffreps_peak_68860	0.284808	67	ENSMUST00000145627	Tnk2	1.18192	0.519029	1	up	Ensembl	380	chr16:32643874-32668279+	exon sense-overlapping	NM_016788	Tnk2	chr16:32644643-32683493+
chr2	26915901	26916006	diffreps_peak_94350	7.38601	105	ENSMUST00000135033	Surf1	12.4087	4.11142e-08	6.1163e-07	up	Ensembl	250	chr2:26915812-26916311-	exon sense-overlapping	ENSMUST00000015934	Surf1	chr2:26913383-26916530-
chr2	173585641	173585940	diffreps_peak_105768	0.331999	299	uc008ody.2	AK047187	1.13728	0.465587	0.989155	up	UCSC_knowngene	2610	chr2:173583411-173586020-	intergenic
chr19	8841261	8841460	diffreps_peak_88491	0.92946	199	ENSMUST00000162580	Bscl2	2.24195	0.117636	0.387169	up	Ensembl	3495	chr19:8840535-8848666+	exon sense-overlapping	NM_001290823	Bscl2	chr19:8840503-8848683+
chr6	28480601	28480900	diffreps_peak_145063	2.29071	299	ENSMUST00000183161	Snd1	1.45829	0.00512026	0.0264509	up	Ensembl	2420	chr6:28480429-28482848+	exon sense-overlapping	ENSMUST00000001460	Snd1	chr6:28480348-28888832+
chr17	34911361	34911600	diffreps_peak_76723	0.23562	239	ENSMUST00000124002	Ehmt2	1.23952	0.581272	1	up	Ensembl	1359	chr17:34910975-34914052+	exon sense-overlapping	NM_001286575	Ehmt2	chr17:34898492-34914050+
chrX	94537961	94538263	diffreps_peak_193427	0.0421233	302	ENSMUST00000141702	Maged1	1.00957	0.907563	1	up	Ensembl	873	chrX:94537675-94538826-	exon sense-overlapping	NM_019791	Maged1	chrX:94535474-94542074-
chr3	96560141	96560359	diffreps_peak_112780	1.27537	218	ENSMUST00000128221	Txnip	2.55755	0.0530436	0.204177	up	Ensembl	393	chr3:96560054-96560565+	exon sense-overlapping	ENSMUST00000074519	Txnip	chr3:96557957-96561883+
chr10	81249684	81249860	diffreps_peak_19541	0.179145	176	ENSMUST00000148029	Zfr2	1.10868	0.661995	1	up	Ensembl	986	chr10:81249051-81250546+	exon sense-overlapping	ENSMUST00000137999	Zfr2	chr10:81248416-81251712+
chr2	30346321	30346453	diffreps_peak_94885	1.38027	132	ENSMUST00000142720	Sh3glb2	1.2202	0.041661	0.166698	up	Ensembl	943	chr2:30346108-30347587-	exon sense-overlapping	ENSMUST00000113621	Sh3glb2	chr2:30344811-30359332-
chr5	137528690	137528920	diffreps_peak_142048	0.355211	230	ENSMUST00000167225	Gnb2	1.12511	0.441356	0.960763	up	Ensembl	712	chr5:137528128-137528920-	exon sense-overlapping	ENSMUST00000143495	Gnb2	chr5:137528131-137533231-
chr7	28816521	28816720	diffreps_peak_157383	0.90083	199	ENSMUST00000173750	Hnrnpl	1.53316	0.125652	0.404159	up	Ensembl	2275	chr7:28808806-28816960+	exon sense-overlapping	ENSMUST00000172884	Hnrnpl	chr7:28809518-28815125+
chr15	72805701	72806000	diffreps_peak_62021	0.835807	299	NR_002864	Peg13	1.49968	0.145946	0.454021	up	RefSeq	4745	chr15:72805600-72810324-	intron sense-overlapping	NM_001164641	Trappc9	chr15:72799524-73061204-
chr18	31317101	31317290	diffreps_peak_83092	1.0233	189	ENSMUST00000082070	Rit2	1.85569	0.094777	0.327473	up	Ensembl	2715	chr18:30973489-31317290-	exon sense-overlapping	ENSMUST00000153060	Rit2	chr18:30974315-31317133-
chr18	69681541	69681798	diffreps_peak_85753	2.71862	257	ENSMUST00000146908	Tcf4	1.30641	0.00191154	0.01076	up	Ensembl	3693	chr18:69679699-69684528+	exon sense-overlapping	NM_013685	Tcf4	chr18:69344492-69687967+
chr9	21281881	21282228	diffreps_peak_179996	0.598568	347	ENSMUST00000183912	Kri1	1.13595	0.252018	0.677587	up	Ensembl	2509	chr9:21278953-21287969-	exon sense-overlapping	NM_145416	Kri1	chr9:21273457-21287969-
chr1	87421490	87421860	diffreps_peak_5926	0.57824	370	ENSMUST00000172776	Gigyf2	1.23444	0.264095	0.698792	up	Ensembl	558	chr1:87420211-87421866+	exon sense-overlapping	ENSMUST00000172794	Gigyf2	chr1:87327029-87449145+
chr11	69908975	69909092	diffreps_peak_28714	1.12087	117	ENSMUST00000175761	Neurl4	1.76414	0.0757063	0.273177	up	Ensembl	734	chr11:69908976-69910865+	exon sense-overlapping	ENSMUST00000177476	Neurl4	chr11:69901816-69913515+
chr7	45495221	45495489	diffreps_peak_159437	0.0823199	268	ENSMUST00000135855	Nucb1	1.06392	0.827333	1	up	Ensembl	361	chr7:45495053-45495489-	intronic antisense	ENSMUST00000107758	Tulp2	chr7:45486364-45522382+
chr7	31135525	31135720	diffreps_peak_157929	0.12794	195	uc009gig.1	Gramd1a	1.52957	0.744836	1	up	UCSC_knowngene	2752	chr7:31130127-31151050-	exon sense-overlapping	NM_027898	Gramd1a	chr7:31130127-31151050-
chr10	40476888	40477020	diffreps_peak_15720	0.296573	132	uc007ewv.2	Cdk19	1.39803	0.505158	1	up	UCSC_knowngene	5885	chr10:40349308-40483818+	exon sense-overlapping	NM_001168304	Cdk19	chr10:40349308-40483818+
chr2	29892185	29892460	diffreps_peak_94732	0.0649138	275	ENSMUST00000148883	Odf2	1.05772	0.861165	1	up	Ensembl	437	chr2:29889234-29892577+	exon sense-overlapping	NM_013615	Odf2	chr2:29890063-29922538+
chr11	102206761	102207020	diffreps_peak_32828	0.116446	259	ENSMUST00000149087	Hdac5	1.11954	0.76481	1	up	Ensembl	5406	chr11:102195749-102218929-	exon sense-overlapping	NM_001284250	Hdac5	chr11:102195747-102230172-
chr11	117115167	117115351	diffreps_peak_34652	0.210958	184	ENSMUST00000127090	Sec14l1	1.22525	0.615236	1	up	Ensembl	3137	chr11:117115168-117152185+	exon sense-overlapping	ENSMUST00000103026	Sec14l1	chr11:117115238-117157559+
chr11	69649604	69649700	diffreps_peak_28581	0.144026	96	ENSMUST00000125989	Fxr2	1.13234	0.717752	1	up	Ensembl	558	chr11:69649605-69651081+	exon sense-overlapping	ENSMUST00000018909	Fxr2	chr11:69632990-69653297+
chr8	124324777	124324800	diffreps_peak_178157	0.531823	23	uc009nxa.1	AK085459	2.18045	0.293885	0.745875	up	UCSC_knowngene	538	chr8:124324778-124331795-	intronic antisense	NM_139272	Galnt2	chr8:124231394-124345723+
chr4	86996301	86996500	diffreps_peak_122448	6.89796	199	ENSMUST00000140780	Slc24a2	12.2054	1.26485e-07	1.43758e-06	up	Ensembl	679	chr4:86996136-87011673-	exon sense-overlapping	ENSMUST00000044990	Slc24a2	chr4:86991173-87227873-
chr12	80517841	80518240	diffreps_peak_40303	7.67015	399	ENSMUST00000181852	Gm26777	12.1922	2.13725e-08	3.92343e-07	up	Ensembl	2573	chr12:80509951-80518916-	bidirectional	NM_001081421	Galnt16	chr12:80518990-80603896+
chr4	122455209	122455435	diffreps_peak_124798	2.13099	226	ENSMUST00000122214	Gm12895	1.55472	0.00739621	0.0368411	up	Ensembl	226	chr4:122455210-122455435+	intergenic
chr7	139840921	139841204	diffreps_peak_167114	7.13788	283	ENSMUST00000129454	Gpr123	12.0486	7.27976e-08	9.31292e-07	up	Ensembl	1413	chr7:139834962-139841204+	exon sense-overlapping	ENSMUST00000026548	Gpr123	chr7:139834174-139878088+
chrX	74318814	74319080	diffreps_peak_192231	13.1423	266	ENSMUST00000138242	Fam50a	12.0131	7.20608e-14	1.98357e-10	up	Ensembl	1918	chrX:74313126-74320134+	exon sense-overlapping	ENSMUST00000114160	Fam50a	chrX:74313033-74320149+
chr10	42055361	42055414	diffreps_peak_15859	7.22444	53	ENSMUST00000061897	Gm9855	11.8968	5.96437e-08	8.01435e-07	up	Ensembl	2854	chr10:42052561-42055414-	intergenic
chr14	69346724	69346800	diffreps_peak_55150	0.556721	76	ENSMUST00000183648	Entpd4	1.91914	0.27751	0.718869	up	Ensembl	418	chr14:69337216-69347564+	exon sense-overlapping	ENSMUST00000184973	Entpd4	chr14:69337174-69367270+
chr4	135986867	135987087	diffreps_peak_126704	0.231252	220	ENSMUST00000125394	Pithd1	1.13372	0.587148	1	up	Ensembl	242	chr4:135986414-135987087-	exon sense-overlapping	NM_025411	Pithd1	chr4:135975602-135987244-
chr2	181187913	181188100	diffreps_peak_106706	0.185744	187	ENSMUST00000135011	Ppdpf	1.18607	0.652013	1	up	Ensembl	510	chr2:181187914-181188504+	exon sense-overlapping	NM_025598	Ppdpf	chr2:181187343-181188504+
chr5	95862501	95862894	diffreps_peak_136507	1.07382	393	ENSMUST00000179006	Gm5559	1.36439	0.0843676	0.298564	up	Ensembl	596	chr5:95861708-95862894+	intergenic
chr7	45451761	45451980	diffreps_peak_159407	1.1621	219	ENSMUST00000140994	Gys1	3.05267	0.0688487	0.252679	up	Ensembl	1000	chr7:45451025-45452116+	exon sense-overlapping	ENSMUST00000107766	Gys1	chr7:45434877-45455847+
chr8	121595701	121595900	diffreps_peak_177627	0.189654	199	ENSMUST00000180548	Map1lc3b	1.43956	0.646168	1	up	Ensembl	4138	chr8:121590481-121598046+	intron sense-overlapping	ENSMUST00000127664	Gm20388	chr8:119910841-124345722+
chr8	11814861	11815021	diffreps_peak_168724	6.32143	160	ENSMUST00000154204	Arhgef7	1.86658	4.7706e-07	4.57192e-06	up	Ensembl	3355	chr8:11812362-11816345+	exon sense-overlapping	ENSMUST00000098938	Arhgef7	chr8:11758354-11835219+
chr18	54987361	54987689	diffreps_peak_84819	0.472698	328	uc008eyh.1	AK155149	1.57516	0.336746	0.814779	up	UCSC_knowngene	2290	chr18:54985400-54987689-	exon sense-overlapping	ENSMUST00000064763	Zfp608	chr18:54888045-54990180-
chr9	95954981	95955380	diffreps_peak_185812	7.66146	399	ENSMUST00000181139	Gm16794	11.8911	2.18043e-08	3.97311e-07	up	Ensembl	1204	chr9:95945669-95955399-	intronic antisense	NM_019864	Atr	chr9:95857597-95951644+
chr19	5423559	5423900	diffreps_peak_87699	1.56226	341	ENSMUST00000124478	Drap1	1.27654	0.0273992	0.116739	up	Ensembl	674	chr19:5422805-5423923-	exon sense-overlapping	ENSMUST00000148219	Drap1	chr19:5422806-5424759-
chr17	6740836	6741055	diffreps_peak_73567	0.598638	219	ENSMUST00000131131	Ezr	1.26917	0.251978	0.677501	up	Ensembl	643	chr17:6740837-6742821-	exon sense-overlapping	ENSMUST00000064234	Ezr	chr17:6738041-6782784-
chr9	45859321	45859580	diffreps_peak_182274	0.137354	259	uc012gsi.2	AK077428	1.16928	0.728864	1	up	UCSC_knowngene	2885	chr9:45856769-45859653-	natural antisense	NM_001145947	Bace1	chr9:45838529-45862484+
chr13	83525061	83525360	diffreps_peak_48637	2.55476	299	uc007rig.1	AK043267	1.12672	0.00278768	0.0152321	up	UCSC_knowngene	2484	chr13:83524856-83527339+	intron sense-overlapping	NM_001170537	Mef2c	chr13:83504034-83667079+
chr2	49309081	49309340	diffreps_peak_96484	0.106191	259	ENSMUST00000119733	Gm13509	1.16838	0.783086	1	up	Ensembl	1308	chr2:49308155-49309462+	intron sense-overlapping	ENSMUST00000122841	Mbd5	chr2:49256561-49316998+
chr4	41522101	41522320	diffreps_peak_118801	0.200127	219	uc008sjb.1	AK086793	1.30499	0.630773	1	up	UCSC_knowngene	1560	chr4:41520896-41525823+	natural antisense	ENSMUST00000108049	Fam219a	chr4:41517691-41569509-
chr13	55476401	55476680	diffreps_peak_46988	0.173848	279	ENSMUST00000135705	Dbn1	1.07806	0.67012	1	up	Ensembl	2119	chr13:55475125-55488066-	exon sense-overlapping	NM_001177372	Dbn1	chr13:55473428-55488076-
chr12	3779547	3779654	diffreps_peak_35846	0.0667878	107	ENSMUST00000174293	Dtnb	1.07375	0.857457	1	up	Ensembl	400	chr12:3779548-3781398+	exon sense-overlapping	ENSMUST00000164578	Dtnb	chr12:3572391-3781398+
chr10	128408315	128408843	diffreps_peak_23142	2.4123	528	ENSMUST00000167456	Nabp2	1.35191	0.00386993	0.0205206	up	Ensembl	929	chr10:128401590-128408843-	exon sense-overlapping	ENSMUST00000164199	Nabp2	chr10:128401395-128409728-
chr11	102200121	102200340	diffreps_peak_32807	0.409751	219	ENSMUST00000126453	Hdac5	1.22673	0.389268	0.892385	up	Ensembl	644	chr11:102198964-102200357-	exon sense-overlapping	ENSMUST00000107151	Hdac5	chr11:102194432-102230166-
chr2	166952921	166953140	diffreps_peak_105218	1.02398	219	ENSMUST00000130790	Stau1	1.49025	0.0946284	0.327048	up	Ensembl	788	chr2:166952907-166963441-	exon sense-overlapping	NM_001109906	Stau1	chr2:166947549-166996299-
chr10	81315021	81315220	diffreps_peak_19611	0.0297907	199	ENSMUST00000159895	Pip5k1c	1.008	0.933704	1	up	Ensembl	897	chr10:81313988-81315782+	exon sense-overlapping	ENSMUST00000105327	Pip5k1c	chr10:81292980-81318254+
chr19	4744541	4744800	diffreps_peak_87410	0.0517679	259	uc008gap.1	Rbm14-rbm4	1.00311	0.88763	1	up	UCSC_knowngene	2612	chr19:4742913-4811634-	exon sense-overlapping	NM_009032	Rbm4	chr19:4784293-4793901-
chr14	55516061	55516385	diffreps_peak_54251	0.432249	324	ENSMUST00000170155	Cpne6	1.21719	0.369616	0.864498	up	Ensembl	4000	chr14:55510475-55517430+	exon sense-overlapping	ENSMUST00000171643	Cpne6	chr14:55511985-55517429+
chr5	129602221	129602440	diffreps_peak_140882	0.927642	219	ENSMUST00000177802	Mmp17	2.78666	0.118129	0.388428	up	Ensembl	646	chr5:129596626-129602451+	exon sense-overlapping	NM_011846	Mmp17	chr5:129584214-129608211+
chr9	45984541	45984835	diffreps_peak_182328	2.04088	294	uc009pgy.1	AK011326	1.51737	0.00910174	0.044387	up	UCSC_knowngene	1364	chr9:45983472-45984835-	exon sense-overlapping	ENSMUST00000172450	Pafah1b2	chr9:45965311-45984871-
chr17	12324396	12324600	diffreps_peak_74050	0.0504555	204	NR_045290	4732491K20Rik	1.07943	0.890317	1	up	RefSeq	3174	chr17:12318853-12327250+	bidirectional	uc008ako.1	Map3k4	chr17:12227621-12318660-
chr18	25597681	25598020	diffreps_peak_82786	12.8997	339	uc008ehp.1	AK161589	11.7267	1.25967e-13	2.4492e-10	up	UCSC_knowngene	2167	chr18:25597490-25603833+	intronic antisense	NM_001146294	Celf4	chr18:25477620-25753983-
chr2	173586561	173586920	diffreps_peak_105774	0.184456	359	uc008odz.2	Ppp4r1l-ps	1.09153	0.65395	1	up	UCSC_knowngene	3603	chr2:173585854-173659539-	bidirectional	NM_024436	Rab22a	chr2:173659845-173702182+
chr1	150447511	150447700	diffreps_peak_10133	0.738576	189	ENSMUST00000152967	Tpr	1.09125	0.182568	0.537588	up	Ensembl	3200	chr1:150438932-150449927+	natural antisense	ENSMUST00000162367	Prg4	chr1:150449816-150466165-
chr14	69415608	69416000	diffreps_peak_55164	6.37959	392	uc029slk.1	Loxl2	11.6139	4.17262e-07	4.05419e-06	up	UCSC_knowngene	2836	chr14:69390793-69480287+	natural antisense	ENSMUST00000179116	Gm21464	chr14:69462309-69503362-
chr7	25291934	25292314	diffreps_peak_156720	0.26089	380	ENSMUST00000167162	Cic	1.11093	0.548416	1	up	Ensembl	428	chr7:25291935-25292461+	exon sense-overlapping	ENSMUST00000169266	Cic	chr7:25267704-25294159+
chr17	62686781	62686999	diffreps_peak_79382	7.11527	218	uc008dfi.1	BC125002	11.6063	7.66883e-08	9.67825e-07	up	UCSC_knowngene	1397	chr17:62685603-62686999-	intron sense-overlapping	ENSMUST00000078839	Efna5	chr17:62607319-62881144-
chr14	66163721	66163906	diffreps_peak_54900	0.609025	185	ENSMUST00000148104	Ptk2b	1.34478	0.246023	0.666712	up	Ensembl	1284	chr14:66156281-66163906-	exon sense-overlapping	ENSMUST00000089250	Ptk2b	chr14:66153262-66281052-
chr2	91263441	91263533	diffreps_peak_99119	0.0914437	92	ENSMUST00000141313	Pacsin3	1.07986	0.810133	1	up	Ensembl	514	chr2:91262913-91263533+	exon sense-overlapping	ENSMUST00000059566	Pacsin3	chr2:91256162-91264679+
chr17	24902861	24903162	diffreps_peak_75014	0.317537	301	ENSMUST00000133198	Mapk8ip3	1.10848	0.481352	1	up	Ensembl	549	chr17:24902690-24903364-	exon sense-overlapping	ENSMUST00000117509	Mapk8ip3	chr17:24897533-24936912-
chr4	116993107	116993260	diffreps_peak_124239	0.527415	153	ENSMUST00000139209	Urod	1.82159	0.296883	0.751229	up	Ensembl	406	chr4:116993108-116994340-	exon sense-overlapping	NM_009478	Urod	chr4:116990217-116994375-
chr8	84617103	84617180	diffreps_peak_174899	0.0111356	77	ENSMUST00000127527	Gm16183	1.03727	0.974685	1	up	Ensembl	1193	chr8:84611202-84617184-	natural antisense	NM_001252059	Cacna1a	chr8:84415364-84640249+
chr5	67814608	67814980	diffreps_peak_134852	2.4584	372	ENSMUST00000128726	Atp8a1	1.3704	0.00348014	0.0186271	up	Ensembl	750	chr5:67812168-67815239-	exon sense-overlapping	NM_001284345	Atp8a1	chr5:67618139-67847431-
chr2	150748981	150749380	diffreps_peak_103178	7.03076	399	ENSMUST00000180851	Gm26681	11.6019	9.3162e-08	1.12533e-06	up	Ensembl	1440	chr2:150748281-150750762-	natural antisense	NM_172117	Entpd6	chr2:150749081-150771674+
chr8	77610859	77611140	diffreps_peak_174195	7.11759	281	uc009mhs.1	AK017010	11.5795	7.62807e-08	9.63623e-07	up	UCSC_knowngene	2072	chr8:77610860-77686570+	natural antisense	ENSMUST00000034029	Ednra	chr8:77663031-77724436-
chr10	80412626	80412820	diffreps_peak_19123	0.0665502	194	ENSMUST00000129027	Tcf3	1.08655	0.857926	1	up	Ensembl	819	chr10:80412627-80415487-	exon sense-overlapping	ENSMUST00000105346	Tcf3	chr10:80409608-80433621-
chrX	151344151	151344540	diffreps_peak_196281	0.792219	389	uc009uoz.1	A230072E10Rik	2.35829	0.161354	0.490085	up	UCSC_knowngene	2940	chrX:151291974-151344846-	natural antisense	ENSMUST00000096285	Wnk3	chrX:151198140-151318309+
chrX	75459962	75460042	diffreps_peak_192280	0.13178	80	ENSMUST00000118725	Gm15385	1.05182	0.738278	1	up	Ensembl	667	chrX:75459963-75485753+	intergenic
chr6	83057213	83057380	diffreps_peak_148617	0.0245129	167	NR_125891	Aup1	1.02664	0.94512	1	up	RefSeq	1721	chr6:83054521-83057682+	natural antisense	ENSMUST00000113963	Htra2	chr6:83051266-83054571-
chr8	122907721	122907940	diffreps_peak_177928	7.56712	219	ENSMUST00000174833	Ankrd11	11.5429	2.70945e-08	4.59325e-07	up	Ensembl	2934	chr8:122906063-122974773-	exon sense-overlapping	ENSMUST00000098334	Ankrd11	chr8:122883337-122974793-
chr9	58233201	58233395	diffreps_peak_183330	7.54471	194	ENSMUST00000138775	Pml	11.3551	2.8529e-08	4.75699e-07	up	Ensembl	481	chr9:58230391-58233395-	exon sense-overlapping	NM_008884	Pml	chr9:58217180-58249786-
chr8	123102861	123103140	diffreps_peak_177960	0.311958	279	ENSMUST00000129311	Rpl13	1.25254	0.487576	1	up	Ensembl	1969	chr8:123102653-123105244+	exon sense-overlapping	ENSMUST00000000756	Rpl13	chr8:123102350-123105244+
chr2	30825361	30825560	diffreps_peak_94950	0.225032	199	ENSMUST00000144330	Asb6	1.0935	0.595618	1	up	Ensembl	1000	chr2:30825156-30828291-	exon sense-overlapping	ENSMUST00000041726	Asb6	chr2:30823097-30830333-
chr9	29941801	29942102	diffreps_peak_180884	0.549384	301	ENSMUST00000151977	Ntm	1.15632	0.282238	0.727256	up	Ensembl	852	chr9:29941548-29963141-	exon sense-overlapping	NM_172290	Ntm	chr9:28995964-29963129-
chr7	49556661	49556730	diffreps_peak_159951	0.239651	69	uc012flb.1	AK088944	1.28683	0.575902	1	up	UCSC_knowngene	2839	chr7:49553892-49556730+	exon sense-overlapping	ENSMUST00000184945	Nav2	chr7:49246844-49610090+
chr7	45707103	45707160	diffreps_peak_159494	0.0210523	57	ENSMUST00000123587	Dbp	1.02306	0.952682	1	up	Ensembl	1732	chr7:45707104-45710028+	natural antisense	NM_001172561	Sphk2	chr7:45709463-45718002-
chr4	139345941	139346180	diffreps_peak_127222	1.26013	239	ENSMUST00000117963	Ccnd3-ps	2.78467	0.0549378	0.21004	up	Ensembl	881	chr4:139345300-139346180-	intergenic
chr6	124763521	124763612	diffreps_peak_152272	1.1112	91	ENSMUST00000147307	Eno2	2.16509	0.07741	0.278288	up	Ensembl	2614	chr6:124760053-124763612-	exon sense-overlapping	ENSMUST00000004378	Eno2	chr6:124760055-124769673-
chr3	65394921	65395231	diffreps_peak_110558	0.138812	310	ENSMUST00000178193	Gm5540	1.17211	0.72642	1	up	Ensembl	1931	chr3:65393301-65395231+	bidirectional	uc008pkn.1	Ssr3	chr3:65379657-65392553-
chr11	100349695	100349860	diffreps_peak_32433	0.0405678	165	ENSMUST00000173304	Gm20394	1.05427	0.910819	1	up	Ensembl	942	chr11:100349696-100350889-	intron sense-overlapping	NM_177981	Hap1	chr11:100347327-100356141-
chr1	36316041	36316327	diffreps_peak_2366	7.06905	286	ENSMUST00000147123	Arid5a	11.2738	8.53007e-08	1.0492e-06	up	Ensembl	563	chr1:36315992-36318136+	exon sense-overlapping	NM_001290726	Arid5a	chr1:36307733-36324029+
chr11	72447552	72447660	diffreps_peak_29139	0.0299248	108	ENSMUST00000152894	Mybbp1a	1.05068	0.933416	1	up	Ensembl	4448	chr11:72441355-72451768+	natural antisense	NM_153060	Spns2	chr11:72451638-72489920-
chr6	113110821	113111060	diffreps_peak_150832	0.205908	239	ENSMUST00000124467	Setd5	1.26655	0.622433	1	up	Ensembl	3848	chr6:113108873-113117931+	exon sense-overlapping	ENSMUST00000113155	Setd5	chr6:113105037-113153435+
chr3	51560901	51561200	diffreps_peak_109744	0.0176004	299	ENSMUST00000180404	5031434O11Rik	1.04574	0.960284	1	up	Ensembl	3727	chr3:51560036-51567114+	natural antisense	ENSMUST00000037141	Setd7	chr3:51515319-51560878-
chr11	98010003	98010376	diffreps_peak_32013	0.167159	373	ENSMUST00000124170	Cacnb1	1.19927	0.68052	1	up	Ensembl	721	chr11:98009660-98012551-	exon sense-overlapping	NM_031173	Cacnb1	chr11:98004925-98022627-
chr4	41524115	41524414	diffreps_peak_118804	2.12597	299	ENSMUST00000146276	Fam219a	1.7654	0.00748229	0.0372078	up	Ensembl	661	chr4:41524116-41569538-	exon sense-overlapping	NM_027993	Fam219a	chr4:41518929-41569527-
chr2	90847512	90847860	diffreps_peak_99025	1.01137	348	uc008ktl.1	Mtch2	1.37399	0.0974161	0.334986	up	UCSC_knowngene	1033	chr2:90847155-90848314+	exon sense-overlapping	ENSMUST00000136872	Mtch2	chr2:90847155-90866810+
chr4	129964041	129964300	diffreps_peak_125903	0.0305128	259	NR_040647	1700003M07Rik	1.00807	0.932153	1	up	RefSeq	2205	chr4:129960374-129965138+	intergenic
chr14	54648087	54648240	diffreps_peak_53962	0.600392	153	ENSMUST00000124271	Acin1	1.23523	0.250962	0.67569	up	Ensembl	1125	chr14:54644727-54648578-	exon sense-overlapping	NM_001242605	Acin1	chr14:54642161-54653685-
chr1	9748261	9748604	diffreps_peak_497	0.103791	343	NR_040462	1700034P13Rik	1.15861	0.787425	1	up	RefSeq	1494	chr1:9747648-9771256+	natural antisense	ENSMUST00000057438	Vcpip1	chr1:9718622-9748382-
chr2	165023081	165023212	diffreps_peak_104892	0.105533	131	ENSMUST00000141663	Ncoa5	1.11373	0.784273	1	up	Ensembl	376	chr2:165022942-165034787-	exon sense-overlapping	ENSMUST00000121377	Ncoa5	chr2:165000360-165034817-
chr12	83651241	83651500	diffreps_peak_40666	0.106818	259	ENSMUST00000182032	Rbm25	1.04257	0.781956	1	up	Ensembl	3806	chr12:83648302-83652107+	exon sense-overlapping	ENSMUST00000182618	Rbm25	chr12:83632253-83651371+
chr3	89225251	89225460	diffreps_peak_112052	7.10624	209	ENSMUST00000144980	Thbs3	11.2644	7.83006e-08	9.82956e-07	up	Ensembl	745	chr3:89224140-89225557+	intronic antisense	ENSMUST00000174126	Mtx1	chr3:89209356-89227052-
chr12	3835181	3835380	diffreps_peak_35868	0.0801484	199	ENSMUST00000173700	Dnmt3a	1.09302	0.83148	1	up	Ensembl	4014	chr12:3806007-3838814+	exon sense-overlapping	ENSMUST00000020991	Dnmt3a	chr12:3807030-3914443+
chr7	109519219	109519475	diffreps_peak_164637	0.797023	256	ENSMUST00000156921	Rpl27a	1.78018	0.159579	0.486013	up	Ensembl	526	chr7:109519220-109520597+	exon sense-overlapping	NM_011975	Rpl27a	chr7:109519195-109522369+
chr5	24590861	24591120	diffreps_peak_131473	6.94388	259	ENSMUST00000144995	Smarcd3	11.2554	1.13795e-07	1.32149e-06	up	Ensembl	3774	chr5:24590818-24601976-	natural antisense	ENSMUST00000088295	Chpf2	chr5:24586744-24594395+
chr16	59600744	59600886	diffreps_peak_70765	0.911014	142	ENSMUST00000172910	Gm9581	1.69886	0.12274	0.399153	up	Ensembl	2870	chr16:59558013-59600886-	intergenic
chr19	46283319	46283485	diffreps_peak_90788	0.560017	166	ENSMUST00000175706	Gbf1	1.53595	0.275412	0.715105	up	Ensembl	612	chr19:46280335-46283485+	exon sense-overlapping	ENSMUST00000026254	Gbf1	chr19:46152509-46286510+
chr2	77936592	77936727	diffreps_peak_98279	6.85203	135	ENSMUST00000156863	Cwc22	11.2494	1.40596e-07	1.56841e-06	up	Ensembl	511	chr2:77930775-77936727-	exon sense-overlapping	ENSMUST00000111824	Cwc22	chr2:77881159-77946180-
chr4	78774021	78774221	diffreps_peak_122063	0.282661	200	ENSMUST00000117472	Gm12913	1.35955	0.521602	1	up	Ensembl	545	chr4:78773677-78774221-	intergenic
chr15	37730841	37730919	diffreps_peak_60258	0.451444	78	ENSMUST00000145909	Ncald	1.9863	0.353636	0.841383	up	Ensembl	626	chr15:37432437-37734335-	exon sense-overlapping	ENSMUST00000153775	Ncald	chr15:37368888-37734634-
chr11	3531001	3531420	diffreps_peak_23565	11.8263	419	ENSMUST00000123459	Gm11946	10.8426	1.49169e-12	9.41856e-10	up	Ensembl	3941	chr11:3530948-3536856+	natural antisense	ENSMUST00000075118	Smtn	chr11:3517523-3539239-
chr5	117115381	117115396	diffreps_peak_138815	0.150212	15	ENSMUST00000149413	9530046B11Rik	1.08179	0.7076	1	up	Ensembl	1157	chr5:117115218-117118723+	intronic antisense	ENSMUST00000086471	Suds3	chr5:117091682-117115993-
chr7	44864161	44864360	diffreps_peak_159078	6.7732	199	ENSMUST00000140732	Ptov1	10.8412	1.68578e-07	1.82351e-06	up	Ensembl	2932	chr7:44863068-44866774-	exon sense-overlapping	ENSMUST00000046575	Ptov1	chr7:44863068-44869788-
chr10	77913981	77914180	diffreps_peak_18521	7.68344	199	ENSMUST00000153842	Trpm2	10.7799	2.07279e-08	3.86484e-07	up	Ensembl	4508	chr10:77909361-77933031-	exon sense-overlapping	NM_138301	Trpm2	chr10:77907722-77969872-
chr9	21230761	21230960	diffreps_peak_179966	0.0290241	199	uc009okn.1	AK154190	1.02002	0.935354	1	up	UCSC_knowngene	2077	chr9:21225371-21232639+	natural antisense	NM_016679	Keap1	chr9:21229730-21239332-
chr1	75170461	75170660	diffreps_peak_4878	0.440713	199	ENSMUST00000160282	Zfand2b	1.57421	0.362482	0.854461	up	Ensembl	829	chr1:75168778-75170687+	exon sense-overlapping	NM_001159905	Zfand2b	chr1:75168646-75171626+
chr6	48442763	48442900	diffreps_peak_146650	0.0633111	137	ENSMUST00000140198	Zfp467	1.06159	0.864349	1	up	Ensembl	357	chr6:48442764-48445494-	exon sense-overlapping	ENSMUST00000114558	Zfp467	chr6:48436637-48445442-
chr8	3608761	3609080	diffreps_peak_167959	0.143554	319	ENSMUST00000163038	Xab2	1.25033	0.718532	1	up	Ensembl	4409	chr8:3608421-3621305-	natural antisense	NM_027171	Camsap3	chr8:3587450-3609075+
chr3	87617558	87617960	diffreps_peak_111640	0.392095	402	ENSMUST00000136072	Arhgef11	1.82382	0.40542	0.913779	up	Ensembl	2408	chr3:87617559-87699145+	exon sense-overlapping	ENSMUST00000039476	Arhgef11	chr3:87617575-87738033+
chr8	85075301	85075680	diffreps_peak_175133	6.91078	379	ENSMUST00000152186	Wdr83	10.7779	1.22806e-07	1.40416e-06	up	Ensembl	2707	chr8:85075052-85081306-	natural antisense	NM_001039514	Dhps	chr8:85071757-85075161+
chr10	127296781	127296944	diffreps_peak_22822	6.93148	163	ENSMUST00000145275	Mars	10.5735	1.17091e-07	1.35168e-06	up	Ensembl	3065	chr10:127296226-127311678-	exon sense-overlapping	NM_001171582	Mars	chr10:127296221-127311786-
chr10	80542381	80542620	diffreps_peak_19135	0.0391888	239	ENSMUST00000182682	Rexo1	1.05315	0.913716	1	up	Ensembl	3533	chr10:80540922-80545836-	exon sense-overlapping	ENSMUST00000182260	Rexo1	chr10:80541664-80547921-
chr15	40162606	40162680	diffreps_peak_60415	7.02623	74	uc007vop.1	BC048765	10.5412	9.41399e-08	1.13462e-06	up	UCSC_knowngene	1061	chr15:40162607-40168073+	intergenic
chr15	37730778	37730919	diffreps_peak_60256	0.239096	141	ENSMUST00000145909	Ncald	1.21458	0.576638	1	up	Ensembl	626	chr15:37432437-37734335-	exon sense-overlapping	NM_001170866	Ncald	chr15:37366175-37792000-
chr3	89168861	89169140	diffreps_peak_112013	0.221264	279	ENSMUST00000138822	Clk2	1.05305	0.600809	1	up	Ensembl	3168	chr3:89164819-89176919+	exon sense-overlapping	ENSMUST00000121931	Clk2	chr3:89164840-89176921+
chr17	71828506	71828660	diffreps_peak_80170	0.228982	154	NR_073185	Clip4	1.29958	0.590226	1	up	RefSeq	2661	chr17:71769691-71864210+	exon sense-overlapping	NM_001271484	Clip4	chr17:71769691-71850164+
chr11	87781681	87781880	diffreps_peak_30895	0.21157	199	ENSMUST00000148814	Bzrap1	1.29522	0.61437	1	up	Ensembl	2678	chr11:87778793-87785928+	exon sense-overlapping	ENSMUST00000039627	Bzrap1	chr11:87760541-87785928+
chr10	79859351	79859560	diffreps_peak_18843	0.503213	209	ENSMUST00000165153	Ptbp1	1.93591	0.313897	0.779158	up	Ensembl	2369	chr10:79854633-79863818+	exon sense-overlapping	NM_001077363	Ptbp1	chr10:79854432-79864435+
chr5	20951401	20951880	diffreps_peak_131092	1.31213	479	NR_030699	A630072M18Rik	1.35584	0.0487387	0.190485	up	RefSeq	5410	chr5:20950989-20956398+	natural antisense	ENSMUST00000036489	Rsbn1l	chr5:20893028-20951822-
chr17	6107399	6107720	diffreps_peak_73475	6.52806	321	ENSMUST00000126982	Tulp4	10.534	2.96439e-07	2.97513e-06	up	Ensembl	906	chr17:6107400-6122344+	intron sense-overlapping	ENSMUST00000142030	Tulp4	chr17:6106479-6206914+
chr16	17640001	17640220	diffreps_peak_67761	0.266897	219	ENSMUST00000167592	Smpd4	1.79396	0.540882	1	up	Ensembl	793	chr16:17638587-17640966+	exon sense-overlapping	ENSMUST00000163997	Smpd4	chr16:17621487-17642803+
chr15	81907341	81907531	diffreps_peak_63771	2.22352	190	ENSMUST00000126352	Aco2	1.75413	0.0059769	0.0304208	up	Ensembl	782	chr15:81907079-81910509+	exon sense-overlapping	NM_080633	Aco2	chr15:81872463-81915137+
chr1	85266697	85266760	diffreps_peak_5659	7.41404	63	ENSMUST00000163068	Gm16026	10.4817	3.85439e-08	5.84792e-07	up	Ensembl	2741	chr1:85266698-85277814+	intronic antisense	NM_175219	C130026I21Rik	chr1:85246344-85270566-
chr4	137727961	137728160	diffreps_peak_126916	0.264591	199	ENSMUST00000123011	Rap1gap	1.19303	0.543762	1	up	Ensembl	703	chr4:137727762-137728936+	exon sense-overlapping	ENSMUST00000141306	Rap1gap	chr4:137718872-137728358+
chr18	6210741	6210960	diffreps_peak_81690	4.06855	219	ENSMUST00000168031	Kif5b	1.5074	8.53992e-05	0.000588988	up	Ensembl	1959	chr18:6203089-6214540-	exon sense-overlapping	NM_008448	Kif5b	chr18:6201005-6241524-
chr7	141946061	141946113	diffreps_peak_167419	0.024735	52	ENSMUST00000173624	Gm20501	1.09359	0.944637	1	up	Ensembl	561	chr7:141945318-141946113-	intergenic
chrX	36839657	36839860	diffreps_peak_190131	10.8773	203	ENSMUST00000127966	C330007P06Rik	10.3201	1.32636e-11	5.10104e-09	up	Ensembl	3873	chrX:36839658-36857012-	exon sense-overlapping	ENSMUST00000047486	C330007P06Rik	chrX:36848550-36874111-
chr7	44470409	44470537	diffreps_peak_158879	0.26474	128	ENSMUST00000125363	Josd2	1.46817	0.543576	1	up	Ensembl	445	chr7:44470410-44471175+	exon sense-overlapping	NM_001205071	Josd2	chr7:44467980-44471658+
chr11	105247458	105247674	diffreps_peak_33316	0.490498	216	ENSMUST00000134419	Tlk2	1.5752	0.323223	0.794297	up	Ensembl	343	chr11:105246758-105247674+	exon sense-overlapping	NM_001294331	Tlk2	chr11:105178807-105283959+
chr12	13753161	13753380	diffreps_peak_36635	3.149	219	ENSMUST00000182021	Gm4929	10.3	0.000709572	0.00431061	up	Ensembl	992	chr12:13752674-13753665-	intergenic
chr5	24696981	24697200	diffreps_peak_131507	4.28916	219	ENSMUST00000181925	Gm26648	1.53491	5.1386e-05	0.0003641	up	Ensembl	5831	chr5:24696902-24704690-	natural antisense	NM_016736	Nub1	chr5:24685815-24710378+
chr3	89177530	89177740	diffreps_peak_112027	0.2449	210	ENSMUST00000156447	Scamp3	1.17009	0.568985	1	up	Ensembl	802	chr3:89177531-89179452+	exon sense-overlapping	ENSMUST00000029684	Scamp3	chr3:89177473-89182765+
chr19	7668341	7668793	diffreps_peak_88366	6.65254	452	ENSMUST00000025669	Gm16437	10.266	2.22566e-07	2.31195e-06	up	Ensembl	507	chr19:7668287-7668793+	intergenic
chr17	14952565	14952740	diffreps_peak_74232	0.0118986	175	ENSMUST00000174163	1600012H06Rik	1.01937	0.972974	1	up	Ensembl	772	chr17:14943271-14959570+	exon sense-overlapping	ENSMUST00000164837	1600012H06Rik	chr17:14943230-14945934+
chr1	84963761	84964120	diffreps_peak_5554	0.060492	359	ENSMUST00000097671	Gm15433	1.08895	0.869978	1	up	Ensembl	891	chr1:84963669-84964559+	intergenic
chr9	50684101	50684460	diffreps_peak_182705	7.35055	359	ENSMUST00000141919	Dixdc1	10.2398	4.46122e-08	6.48083e-07	up	Ensembl	6453	chr9:50662756-50699362-	exon sense-overlapping	ENSMUST00000121634	Dixdc1	chr9:50666195-50739517-
chr4	137795801	137796180	diffreps_peak_126933	7.79042	379	ENSMUST00000138463	Alpl	10.2133	1.62026e-08	3.31547e-07	up	Ensembl	719	chr4:137755630-137796230-	exon sense-overlapping	NM_007431	Alpl	chr4:137741731-137796384-
chr16	20741881	20742140	diffreps_peak_68192	0.338144	259	ENSMUST00000151150	Chrd	1.78571	0.459046	0.981686	up	Ensembl	4406	chr16:20736206-20742382+	exon sense-overlapping	NM_009893	Chrd	chr16:20733127-20742384+
chr5	3236721	3236907	diffreps_peak_129780	0.00302138	186	ENSMUST00000078810	Gm15772	1.01239	0.993067	1	up	Ensembl	519	chr5:3236389-3236907+	intergenic
chr8	4206421	4206800	diffreps_peak_168060	1.97455	379	ENSMUST00000177130	4932443L11Rik	1.67555	0.0106034	0.0508541	up	Ensembl	2827	chr8:4162522-4206882-	intronic antisense	ENSMUST00000177053	Evi5l	chr8:4166567-4193701+
chr7	45451941	45452116	diffreps_peak_159409	0.210973	175	ENSMUST00000140994	Gys1	1.30554	0.615215	1	up	Ensembl	1000	chr7:45451025-45452116+	exon sense-overlapping	ENSMUST00000003964	Gys1	chr7:45434844-45456619+
chr4	41520821	41520994	diffreps_peak_118798	1.1632	173	ENSMUST00000122839	Gm12404	1.94378	0.0686756	0.252225	up	Ensembl	1661	chr4:41520694-41525823+	natural antisense	NM_001159583	Fam219a	chr4:41518929-41569527-
chr5	35098121	35098273	diffreps_peak_132637	0.151566	152	ENSMUST00000147028	Lrpap1	1.15326	0.705398	1	up	Ensembl	1154	chr5:35097598-35105689-	exon sense-overlapping	ENSMUST00000132754	Lrpap1	chr5:35102509-35104540-
chr1	151416318	151416460	diffreps_peak_10154	0.0100415	142	ENSMUST00000131312	Swt1	1.05672	0.977144	1	up	Ensembl	5176	chr1:151416319-151423344-	exon sense-overlapping	ENSMUST00000064771	Swt1	chr1:151367699-151428455-
chr7	144485028	144485180	diffreps_peak_167784	0.141028	152	ENSMUST00000182958	Ppfia1	1.105	0.722724	1	up	Ensembl	3444	chr7:144476766-144513274-	exon sense-overlapping	ENSMUST00000168134	Ppfia1	chr7:144476758-144553729-
chr11	120720021	120720333	diffreps_peak_35602	0.912198	312	ENSMUST00000155187	Lrrc45	1.5566	0.122406	0.398484	up	Ensembl	898	chr11:120719731-120720912+	exon sense-overlapping	NM_153545	Lrrc45	chr11:120713953-120721127+
chr11	6012581	6012800	diffreps_peak_24025	0.277765	219	ENSMUST00000129098	Camk2b	1.26956	0.527515	1	up	Ensembl	4125	chr11:6011665-6065658-	exon sense-overlapping	NM_007595	Camk2b	chr11:5969666-6065748-
chr14	54679113	54679220	diffreps_peak_53990	0.140923	107	ENSMUST00000132242	Acin1	1.07277	0.722898	1	up	Ensembl	452	chr14:54679114-54686615-	exon sense-overlapping	NM_001085473	Acin1	chr14:54642161-54686931-
chr5	72914821	72915080	diffreps_peak_135159	0.0506655	259	ENSMUST00000183284	Slain2	1.1238	0.889886	1	up	Ensembl	4068	chr5:72914418-72918485+	exon sense-overlapping	NM_001113423	Slain2	chr5:72914362-72978841+
chr7	44385301	44385449	diffreps_peak_158791	0.769014	148	ENSMUST00000132399	Syt3	2.37885	0.17021	0.509896	up	Ensembl	431	chr7:44384127-44385449+	exon sense-overlapping	NM_016663	Syt3	chr7:44384126-44400030+
chr13	55003041	55003260	diffreps_peak_46899	0.166254	219	ENSMUST00000142906	Unc5a	1.10465	0.68194	1	up	Ensembl	898	chr13:55003010-55004653+	exon sense-overlapping	NM_153131	Unc5a	chr13:54949432-55006018+
chr4	129631381	129631710	diffreps_peak_125862	0.293543	329	ENSMUST00000142577	Txlna	1.31809	0.508695	1	up	Ensembl	4918	chr4:129626083-129640640-	exon sense-overlapping	ENSMUST00000132217	Txlna	chr4:129634397-129640959-
chr19	38481108	38481280	diffreps_peak_90203	6.64955	172	ENSMUST00000181994	Plce1	10.1929	2.24103e-07	2.32644e-06	up	Ensembl	473	chr19:38481109-38524066+	exon sense-overlapping	ENSMUST00000182481	Plce1	chr19:38481121-38783430+
chr2	32312683	32313077	diffreps_peak_95291	4.70333	394	ENSMUST00000141633	Dnm1	1.55024	1.98004e-05	0.00014744	up	Ensembl	495	chr2:32312242-32313077-	exon sense-overlapping	ENSMUST00000113350	Dnm1	chr2:32308471-32353302-
chr7	44551056	44551859	diffreps_peak_158933	0.440047	803	ENSMUST00000132769	Nr1h2	1.31976	0.363039	0.855206	up	Ensembl	1530	chr7:44551057-44553951-	exon sense-overlapping	ENSMUST00000107911	Nr1h2	chr7:44549617-44553948-
chr15	97766661	97766860	diffreps_peak_65174	0.467112	199	ENSMUST00000124374	Gm16256	1.18804	0.341105	0.821882	up	Ensembl	920	chr15:97766549-97768713+	natural antisense	NM_144850	Rapgef3	chr15:97744770-97767666-
chr7	28777190	28777320	diffreps_peak_157357	1.55968	130	ENSMUST00000141077	Sirt2	1.81802	0.0275628	0.117358	up	Ensembl	643	chr7:28776858-28777684+	exon sense-overlapping	NM_022432	Sirt2	chr7:28766752-28788665+
chr12	33358581	33358960	diffreps_peak_37600	7.15806	379	NR_131031	Atxn7l1os2	10.1273	6.9493e-08	9.00014e-07	up	RefSeq	2019	chr12:33358252-33394760-	natural antisense	ENSMUST00000090597	Atxn7l1	chr12:33302515-33368273+
chrX	103562661	103562900	diffreps_peak_193939	0.689399	239	NR_028381	Ftx	2.02911	0.204457	0.584281	up	RefSeq	4272	chrX:103560910-103623754-	intergenic
chr2	119712008	119712180	diffreps_peak_101004	0.0505456	172	ENSMUST00000149904	Rtf1	1.06947	0.890132	1	up	Ensembl	538	chr2:119710996-119712462+	exon sense-overlapping	ENSMUST00000028767	Rtf1	chr2:119675068-119735407+
chr2	166950780	166951220	diffreps_peak_105210	0.656269	440	ENSMUST00000149454	Stau1	1.59746	0.220664	0.617882	up	Ensembl	774	chr2:166949246-166951231-	exon sense-overlapping	NM_001109906	Stau1	chr2:166947549-166996299-
chr7	141432662	141432820	diffreps_peak_167353	0.709959	158	ENSMUST00000144174	Slc25a22	1.30991	0.195003	0.564428	up	Ensembl	693	chr7:141431368-141432848-	exon sense-overlapping	ENSMUST00000106006	Slc25a22	chr7:141429749-141437631-
chr10	116473162	116473380	diffreps_peak_22006	0.197894	218	NR_130644	Kcnmb4os2	1.05232	0.634024	1	up	RefSeq	1615	chr10:116473163-116474986+	natural antisense	NM_021452	Kcnmb4	chr10:116417868-116473523-
chr15	81910288	81910500	diffreps_peak_63773	2.87831	212	ENSMUST00000144324	Aco2	1.44567	0.0013234	0.00767639	up	Ensembl	703	chr15:81910289-81913293+	exon sense-overlapping	NM_080633	Aco2	chr15:81872463-81915137+
chr10	79862381	79862541	diffreps_peak_18848	0.536977	160	ENSMUST00000169580	Ptbp1	1.7736	0.290418	0.740228	up	Ensembl	2108	chr10:79862017-79864432+	natural antisense	ENSMUST00000167250	BC005764	chr10:79860475-79874570-
chr9	44113401	44113517	diffreps_peak_181849	7.01489	116	uc009pbm.1	Rnf26	10.0757	9.66286e-08	1.15826e-06	up	UCSC_knowngene	2981	chr9:44066327-44113517-	intronic antisense	NM_145613	C1qtnf5	chr9:44101770-44109187+
chr2	175805221	175805420	diffreps_peak_106059	7.44057	199	ENSMUST00000118709	Rps8-ps2	10.0197	3.62598e-08	5.60199e-07	up	Ensembl	624	chr2:175804983-175805606-	intergenic
chr11	69588141	69588547	diffreps_peak_28563	6.3752	406	ENSMUST00000147512	Trp53	9.99945	4.21499e-07	4.09073e-06	up	Ensembl	3275	chr11:69580402-69590505+	exon sense-overlapping	ENSMUST00000108658	Trp53	chr11:69580359-69591872+
chr10	81120853	81121110	diffreps_peak_19425	0.524936	257	ENSMUST00000128937	Map2k2	2.05184	0.298582	0.754093	up	Ensembl	917	chr10:81120854-81122562+	exon sense-overlapping	NM_023138	Map2k2	chr10:81105947-81124697+
chr3	11014398	11015020	diffreps_peak_107317	6.75635	622	ENSMUST00000178029	Gm8910	9.98473	1.75247e-07	1.88484e-06	up	Ensembl	765	chr3:11014399-11015163-	intergenic
chr2	129800681	129800880	diffreps_peak_101786	0.370731	199	NR_029452	4932416H05Rik	1.19484	0.425862	0.940675	up	RefSeq	3091	chr2:129798369-129801459-	natural antisense	ENSMUST00000166282	Stk35	chr2:129800517-129832287+
chr16	18248321	18248434	diffreps_peak_67894	0.366004	113	ENSMUST00000134035	Ranbp1	1.47501	0.430523	0.946694	up	Ensembl	599	chr16:18245205-18248434-	exon sense-overlapping	ENSMUST00000115645	Ranbp1	chr16:18239784-18248732-
chr17	46529593	46529880	diffreps_peak_77881	0.322657	287	ENSMUST00000183163	Cul9	1.2316	0.475711	1	up	Ensembl	1017	chr17:46529594-46538076-	exon sense-overlapping	ENSMUST00000066026	Cul9	chr17:46500605-46546388-
chr8	71708961	71709160	diffreps_peak_173744	0.266156	199	NR_028267	Fcho1	1.10068	0.541807	1	up	RefSeq	3399	chr8:71708387-71725681-	exon sense-overlapping	NM_028715	Fcho1	chr8:71708387-71725681-
chr17	56568894	56569300	diffreps_peak_78944	3.30774	406	ENSMUST00000127947	Safb2	1.36442	0.00049233	0.00306895	up	Ensembl	632	chr17:56567533-56569434-	exon sense-overlapping	ENSMUST00000131056	Safb2	chr17:56565997-56571438-
chr6	36956701	36956940	diffreps_peak_145660	2.74142	239	ENSMUST00000108332	Gm7452	1.72116	0.00181374	0.0102592	up	Ensembl	3769	chr6:36956644-36960417+	intron sense-overlapping	ENSMUST00000031863	1700111E14Rik	chr6:36937048-36985777+
chr11	121221121	121221590	diffreps_peak_35699	6.65677	469	ENSMUST00000124925	Hexdc	9.96477	2.20409e-07	2.29295e-06	up	Ensembl	3921	chr11:121204758-121222647+	natural antisense	ENSMUST00000106115	BC017643	chr11:121222588-121229305-
chr11	120719001	120719132	diffreps_peak_35594	0.049239	131	ENSMUST00000150225	Lrrc45	1.05779	0.892814	1	up	Ensembl	1139	chr11:120717515-120719972+	exon sense-overlapping	NM_153545	Lrrc45	chr11:120713953-120721127+
chr8	83570561	83570860	diffreps_peak_174480	0.127422	299	ENSMUST00000127162	Ndufb7	1.20367	0.745725	1	up	Ensembl	4435	chr8:83566758-83571626+	exon sense-overlapping	NM_025843	Ndufb7	chr8:83566758-83571623+
chr7	122290281	122290321	diffreps_peak_165469	1.00792	40	ENSMUST00000131167	Prkcb	1.27024	0.098194	0.337107	up	Ensembl	409	chr7:122290028-122425041+	exon sense-overlapping	NM_008855	Prkcb	chr7:122289125-122634401+
chrX	73492923	73493056	diffreps_peak_192067	8.20062	133	ENSMUST00000155231	Bgn	9.9108	6.30061e-09	2.02168e-07	up	Ensembl	460	chrX:73492057-73493310+	exon sense-overlapping	ENSMUST00000169489	Bgn	chrX:73483635-73495929+
chr6	83195481	83195690	diffreps_peak_148715	0.495041	209	ENSMUST00000130917	Dctn1	1.18532	0.319859	0.789056	up	Ensembl	717	chr6:83195102-83196068+	exon sense-overlapping	ENSMUST00000113918	Dctn1	chr6:83179589-83200116+
chr7	44863534	44863980	diffreps_peak_159075	0.620617	446	ENSMUST00000140732	Ptov1	1.45952	0.239543	0.655081	up	Ensembl	2932	chr7:44863068-44866774-	exon sense-overlapping	ENSMUST00000046575	Ptov1	chr7:44863068-44869788-
chr17	34840857	34841060	diffreps_peak_76677	6.90953	203	ENSMUST00000172803	Skiv2l	9.87721	1.23159e-07	1.40669e-06	up	Ensembl	462	chr17:34840530-34841128-	exon sense-overlapping	ENSMUST00000046022	Skiv2l	chr17:34839244-34850210-
chr6	113321661	113321880	diffreps_peak_150919	7.08923	219	ENSMUST00000131594	Brpf1	9.87144	8.14281e-08	1.01262e-06	up	Ensembl	2747	chr6:113320541-113324702+	exon sense-overlapping	ENSMUST00000113119	Brpf1	chr6:113307192-113324702+
chr5	115724463	115724560	diffreps_peak_138561	0.476111	97	ENSMUST00000148840	Ccdc64	1.88384	0.33411	0.810664	up	Ensembl	600	chr5:115724464-115731428-	exon sense-overlapping	ENSMUST00000141950	Ccdc64	chr5:115670185-115731367-
chr11	30267541	30267780	diffreps_peak_25284	0.981839	239	ENSMUST00000146985	Gm8098	2.98851	0.10427	0.353657	up	Ensembl	1499	chr11:30267464-30280491+	intronic antisense	ENSMUST00000006629	Sptbn1	chr11:30099395-30268169-
chr18	12186681	12186980	diffreps_peak_81994	6.54973	299	ENSMUST00000139151	3110002H16Rik	9.81477	2.82011e-07	2.847e-06	up	Ensembl	3776	chr18:12185431-12189974+	exon sense-overlapping	NM_029623	3110002H16Rik	chr18:12168730-12189969+
chr16	17926265	17926400	diffreps_peak_67822	0.150636	135	ENSMUST00000150925	Slc25a1	1.24261	0.70691	1	up	Ensembl	941	chr16:17926266-17927887-	exon sense-overlapping	ENSMUST00000003622	Slc25a1	chr16:17925211-17928219-
chr4	134365358	134365424	diffreps_peak_126545	7.28679	66	ENSMUST00000142730	Extl1	9.8037	5.16661e-08	7.21012e-07	up	Ensembl	396	chr4:134362705-134365424-	exon sense-overlapping	ENSMUST00000030643	Extl1	chr4:134356372-134372558-
chr1	56972401	56972620	diffreps_peak_3704	7.22923	219	NR_024325	9130024F11Rik	9.79677	5.89884e-08	7.9519e-07	up	RefSeq	3728	chr1:56971469-56975196+	natural antisense	ENSMUST00000042857	Satb2	chr1:56793989-56972502-
chr2	155594365	155594475	diffreps_peak_103716	7.62039	110	ENSMUST00000144649	Gm14257	9.77407	2.39666e-08	4.23503e-07	up	Ensembl	765	chr2:155593565-155594475-	intergenic
chr11	53111681	53112193	diffreps_peak_26816	6.5712	512	NR_046047	Gm11186	9.77318	2.68408e-07	2.72472e-06	up	RefSeq	1179	chr11:53111451-53120056-	intronic antisense	NM_177059	Fstl4	chr11:52764706-53187347+
chr5	74594781	74594980	diffreps_peak_135276	0.329292	199	ENSMUST00000125129	Fip1l1	1.252	0.468498	0.992841	up	Ensembl	547	chr5:74594743-74595916+	intronic antisense	ENSMUST00000113531	Lnx1	chr5:74592447-74677872-
chr4	83463561	83463713	diffreps_peak_122285	0.304439	152	ENSMUST00000144349	Psip1	1.12478	0.496091	1	up	Ensembl	1003	chr4:83462830-83465043-	exon sense-overlapping	ENSMUST00000107214	Psip1	chr4:83461871-83486453-
chr16	31428721	31428920	diffreps_peak_68779	0.0613694	199	ENSMUST00000182690	Gm15743	1.00117	0.868222	1	up	Ensembl	1901	chr16:31427876-31429776-	natural antisense	ENSMUST00000115227	Bdh1	chr16:31428748-31458901+
chr12	111789321	111789480	diffreps_peak_42850	5.02085	159	ENSMUST00000124197	Klc1	1.29489	9.53133e-06	7.38628e-05	up	Ensembl	227	chr12:111789322-111794398+	exon sense-overlapping	NM_001025360	Klc1	chr12:111758849-111806775+
chr4	154992532	154992620	diffreps_peak_129408	7.29179	88	ENSMUST00000176620	Plch2	9.76231	5.1075e-08	7.15289e-07	up	Ensembl	4158	chr4:154983373-154992620-	exon sense-overlapping	NM_175556	Plch2	chr4:154983115-155010984-
chr4	117289198	117289280	diffreps_peak_124274	0.142305	82	ENSMUST00000154974	Rnf220	1.08766	0.720601	1	up	Ensembl	1492	chr4:117285092-117289442-	exon sense-overlapping	ENSMUST00000102690	Rnf220	chr4:117271464-117288772-
chr17	33630341	33630474	diffreps_peak_76429	7.36462	133	ENSMUST00000169781	Zfp414	9.72875	4.31901e-08	6.33278e-07	up	Ensembl	470	chr17:33630201-33630771+	exon sense-overlapping	ENSMUST00000170225	Zfp414	chr17:33629121-33631464+
chr1	172290561	172290760	diffreps_peak_11656	0.63164	199	ENSMUST00000155363	Igsf8	1.30583	0.233539	0.643382	up	Ensembl	2650	chr1:172261641-172292725+	natural antisense	ENSMUST00000137679	Atp1a2	chr1:172284309-172298064-
chr17	32285141	32285360	diffreps_peak_76235	1.72925	219	ENSMUST00000181112	Gm26549	1.52182	0.0186531	0.0835918	up	Ensembl	1209	chr17:32284787-32298689+	bidirectional	uc008bwf.1	Brd4	chr17:32213527-32284721-
chr10	80542341	80542560	diffreps_peak_19134	0.0162572	219	ENSMUST00000182682	Rexo1	1.04917	0.963258	1	up	Ensembl	3533	chr10:80540922-80545836-	exon sense-overlapping	NM_025852	Rexo1	chr10:80540926-80561560-
chr11	98438601	98438716	diffreps_peak_32149	7.30691	115	ENSMUST00000154452	Gm12352	9.62309	4.93281e-08	6.96639e-07	up	Ensembl	760	chr11:98438037-98439046+	natural antisense	ENSMUST00000002655	Mien1	chr11:98437708-98438991-
chr4	155891357	155891700	diffreps_peak_129679	12.564	343	ENSMUST00000142724	Pusl1	9.60513	2.72876e-13	3.34251e-10	up	Ensembl	883	chr4:155890494-155891726-	exon sense-overlapping	NM_001033490	Pusl1	chr4:155888860-155891762-
chr16	43577641	43577860	diffreps_peak_69852	0.52415	219	ENSMUST00000139491	Zbtb20	2.22578	0.299123	0.755046	up	Ensembl	2063	chr16:43363464-43578751+	exon sense-overlapping	ENSMUST00000079441	Zbtb20	chr16:43247284-43619069+
chr7	16284224	16284320	diffreps_peak_155343	0.0589203	96	ENSMUST00000148741	Ccdc9	1.07099	0.873132	1	up	Ensembl	479	chr7:16282510-16286780-	exon sense-overlapping	ENSMUST00000118976	Ccdc9	chr7:16274045-16286790-
chr11	5070625	5070740	diffreps_peak_23866	0.0502295	115	ENSMUST00000130118	Ewsr1	1.06474	0.89078	1	up	Ensembl	649	chr11:5069974-5070891-	exon sense-overlapping	NM_001283061	Ewsr1	chr11:5069687-5099088-
chr5	35848775	35848905	diffreps_peak_132710	0.47292	130	ENSMUST00000153025	Ablim2	1.37737	0.336574	0.8145	up	Ensembl	2864	chr5:35848776-35869192+	exon sense-overlapping	ENSMUST00000151636	Ablim2	chr5:35828124-35874884+
chr1	193356101	193356440	diffreps_peak_12946	7.28282	339	ENSMUST00000167700	Camk1g	9.53566	5.21416e-08	7.26076e-07	up	Ensembl	815	chr1:193355993-193362087-	exon sense-overlapping	NM_144817	Camk1g	chr1:193346346-193370282-
chr7	30317301	30317500	diffreps_peak_157669	10.2447	199	ENSMUST00000176536	Syne4	9.5125	5.69187e-11	1.75802e-08	up	Ensembl	1079	chr7:30317240-30319040+	exon sense-overlapping	NM_001290565	Syne4	chr7:30314816-30319045+
chr7	135651861	135652240	diffreps_peak_166917	0.719654	379	NR_015548	5830432E09Rik	2.06698	0.190698	0.555142	up	RefSeq	1494	chr7:135648457-135652314-	natural antisense	NM_011212	Ptpre	chr7:135537824-135686294+
chr5	125025651	125026087	diffreps_peak_140325	0.964559	436	ENSMUST00000130742	Ncor2	1.36269	0.108503	0.365105	up	Ensembl	683	chr5:125025102-125026087-	exon sense-overlapping	ENSMUST00000111394	Ncor2	chr5:125017835-125179202-
chr2	143952191	143952281	diffreps_peak_102816	0.325337	90	ENSMUST00000154649	Rrbp1	1.37681	0.472784	0.997362	up	Ensembl	1048	chr2:143947395-143952281-	exon sense-overlapping	ENSMUST00000016072	Rrbp1	chr2:143947395-144011263-
chr2	85198601	85198675	diffreps_peak_98784	0.0549804	74	ENSMUST00000126401	Gm13716	1.11127	0.881089	1	up	Ensembl	808	chr2:85196932-85198675+	bidirectional	ENSMUST00000099930	Lrrc55	chr2:85162334-85196699-
chr13	47105380	47105680	diffreps_peak_46229	0.0889961	300	ENSMUST00000150652	Dek	1.07273	0.814712	1	up	Ensembl	468	chr13:47105381-47106183-	exon sense-overlapping	ENSMUST00000129352	Dek	chr13:47098155-47105830-
chr13	69611961	69612320	diffreps_peak_48025	0.186875	359	ENSMUST00000168625	Gm17108	1.40617	0.650317	1	up	Ensembl	2877	chr13:69610498-69614901-	natural antisense	ENSMUST00000143716	Nsun2	chr13:69533746-69615468+
chr6	83172507	83172700	diffreps_peak_148668	6.81191	193	ENSMUST00000154953	Gm15624	9.5	1.54202e-07	1.69404e-06	up	Ensembl	713	chr6:83166152-83172733-	intronic antisense	ENSMUST00000130212	Dctn1	chr6:83166004-83189582+
chr12	3835281	3835520	diffreps_peak_35870	0.0847971	239	ENSMUST00000173700	Dnmt3a	1.17259	0.822627	1	up	Ensembl	4014	chr12:3806007-3838814+	exon sense-overlapping	NM_007872	Dnmt3a	chr12:3806980-3914443+
chr3	130030641	130030840	diffreps_peak_114892	0.00828464	199	ENSMUST00000168908	Sec24b	1.07049	0.981105	1	up	Ensembl	527	chr3:130009785-130030867-	exon sense-overlapping	ENSMUST00000001079	Sec24b	chr3:129982759-130060907-
chr19	6281217	6281392	diffreps_peak_87992	6.87335	175	ENSMUST00000165797	Ehd1	9.39638	1.33861e-07	1.50645e-06	up	Ensembl	629	chr19:6276925-6281392+	exon sense-overlapping	NM_010119	Ehd1	chr19:6276896-6300096+
chr6	117997341	117997720	diffreps_peak_151482	6.65964	379	ENSMUST00000118257	Gm4875	9.39361	2.18958e-07	2.27995e-06	up	Ensembl	786	chr6:117997207-117997992+	intergenic
chr4	147379301	147379574	diffreps_peak_128210	0.0393857	273	ENSMUST00000121570	Gm8178	1.07722	0.913302	1	up	Ensembl	646	chr4:147378929-147379574+	intron sense-overlapping	ENSMUST00000133078	Gm13145	chr4:147361303-147390289+
chr15	37730778	37730860	diffreps_peak_60254	0.341566	82	ENSMUST00000145909	Ncald	1.25073	0.455443	0.977247	up	Ensembl	626	chr15:37432437-37734335-	exon sense-overlapping	ENSMUST00000168992	Ncald	chr15:37366175-37792000-
chr11	77348181	77348540	diffreps_peak_29630	8.75793	359	ENSMUST00000180394	Ssh2	9.34742	1.74609e-09	1.60662e-07	up	Ensembl	3446	chr11:77346743-77350188+	intron sense-overlapping	ENSMUST00000037912	Ssh2	chr11:77216287-77460220+
chr15	78436900	78437020	diffreps_peak_62932	0.201839	120	NR_110357	Kctd17	1.10857	0.628291	1	up	RefSeq	1743	chr15:78428564-78439303+	exon sense-overlapping	ENSMUST00000159771	Kctd17	chr15:78428662-78438843+
chr2	20709374	20709500	diffreps_peak_93463	0.280441	126	ENSMUST00000137186	Gm13362	1.22858	0.524275	1	up	Ensembl	839	chr2:20709375-20713234-	natural antisense	NM_001177630	Etl4	chr2:20519513-20810535+
chr4	133695571	133695880	diffreps_peak_126469	5.31857	309	ENSMUST00000138473	Arid1a	1.69125	4.80207e-06	3.87085e-05	up	Ensembl	3964	chr4:133689487-133753982-	exon sense-overlapping	NM_001080819	Arid1a	chr4:133679008-133753611-
chr9	107769301	107769520	diffreps_peak_186626	0.364312	219	ENSMUST00000181993	Rbm5	1.18852	0.432203	0.94883	up	Ensembl	1775	chr9:107769185-107770959-	exon sense-overlapping	ENSMUST00000182659	Rbm5	chr9:107740371-107770996-
chr6	127282261	127282500	diffreps_peak_152592	0.127481	239	ENSMUST00000121087	Gm7308	1.08635	0.745622	1	up	Ensembl	447	chr6:127282063-127282509-	intergenic
chr8	87523701	87523900	diffreps_peak_175242	7.31971	199	ENSMUST00000180700	Gm2694	9.31437	4.78953e-08	6.80997e-07	up	Ensembl	2314	chr8:87472812-87523900+	bidirectional	uc009mqr.1	Cbln1	chr8:87468853-87472592-
chr2	72225121	72225320	diffreps_peak_98025	11.9762	199	uc008kbr.1	AK079188	9.31075	1.05637e-12	7.39411e-10	up	UCSC_knowngene	2116	chr2:72224688-72232302-	natural antisense	NM_001204165	Rapgef4	chr2:71981215-72257474+
chr14	68125517	68125560	diffreps_peak_55090	0.244391	43	NR_045897	A230070E04Rik	1.40105	0.569651	1	up	RefSeq	1851	chr14:68123752-68131371+	natural antisense	ENSMUST00000022638	Nefm	chr14:68119283-68124846-
chr2	132808203	132808560	diffreps_peak_102109	1.31293	357	ENSMUST00000152836	Trmt6	1.81344	0.0486483	0.190193	up	Ensembl	4153	chr2:132804207-132810635-	exon sense-overlapping	ENSMUST00000039554	Trmt6	chr2:132804207-132816054-
chr1	124045501	124045717	diffreps_peak_8104	7.02503	216	ENSMUST00000097605	Gm10543	9.30471	9.43995e-08	1.13671e-06	up	Ensembl	1588	chr1:124044823-124046412+	natural antisense	NM_199021	Dpp10	chr1:123332138-124045559-
chr5	114719578	114719920	diffreps_peak_138310	0.198014	342	ENSMUST00000124242	Tchp	1.1383	0.633849	1	up	Ensembl	3138	chr5:114707864-114722327+	exon sense-overlapping	ENSMUST00000131679	Tchp	chr5:114714635-114719689+
chr11	70665221	70665364	diffreps_peak_28924	0.00758805	143	ENSMUST00000124691	Spag7	1.01936	0.98268	1	up	Ensembl	772	chr11:70664340-70669279-	exon sense-overlapping	NM_001167669	Spag7	chr11:70663769-70669416-
chr10	76719124	76719236	diffreps_peak_18402	0.281068	112	ENSMUST00000137599	Col6a1	1.51915	0.523518	1	up	Ensembl	925	chr10:76715016-76719236-	exon sense-overlapping	ENSMUST00000001147	Col6a1	chr10:76708792-76726168-
chr13	24155054	24155209	diffreps_peak_44912	4.07569	155	ENSMUST00000144159	Lrrc16a	1.81575	8.40055e-05	0.000580078	up	Ensembl	394	chr13:24139289-24155209-	exon sense-overlapping	ENSMUST00000110398	Lrrc16a	chr13:24013061-24280716-
chr5	121818541	121818780	diffreps_peak_139596	6.79902	239	ENSMUST00000136960	Sh2b3	9.29969	1.58847e-07	1.73595e-06	up	Ensembl	4313	chr5:121815488-121836825-	exon sense-overlapping	ENSMUST00000118580	Sh2b3	chr5:121817290-121836817-
chr17	35963125	35963392	diffreps_peak_77028	0.426398	267	ENSMUST00000174834	Abcf1	1.1759	0.37463	0.87199	up	Ensembl	787	chr17:35961701-35964272-	exon sense-overlapping	NM_013854	Abcf1	chr17:35956819-35969750-
chr2	45109021	45109220	diffreps_peak_96328	0.00239006	199	ENSMUST00000123037	Zeb2	1.00814	0.994512	1	up	Ensembl	3852	chr2:45106485-45113001-	exon sense-overlapping	ENSMUST00000028229	Zeb2	chr2:44987121-45110464-
chr7	49589201	49589460	diffreps_peak_159978	0.0113458	259	ENSMUST00000183715	Nav2	1.09477	0.974214	1	up	Ensembl	1290	chr7:49587417-49590053+	exon sense-overlapping	NM_175272	Nav2	chr7:49246189-49610088+
chr11	5972631	5972888	diffreps_peak_23989	4.66282	257	ENSMUST00000155755	Camk2b	1.18534	2.1736e-05	0.000161011	up	Ensembl	3328	chr11:5969668-5984138-	exon sense-overlapping	ENSMUST00000101586	Camk2b	chr11:5972217-6065570-
chr2	32712564	32712860	diffreps_peak_95435	0.0963497	296	ENSMUST00000123170	Cdk9	1.12924	0.801033	1	up	Ensembl	1689	chr2:32707849-32713076-	exon sense-overlapping	ENSMUST00000009699	Cdk9	chr2:32707438-32712784-
chr2	121359361	121359777	diffreps_peak_101218	0.815709	416	ENSMUST00000128612	Ckmt1	1.276	0.152859	0.470311	up	Ensembl	695	chr2:121358844-121360019+	exon sense-overlapping	ENSMUST00000000317	Ckmt1	chr2:121358610-121363737+
chr4	99929341	99929660	diffreps_peak_123117	1.02316	319	ENSMUST00000123830	Itgb3bp	2.57719	0.0948064	0.327556	up	Ensembl	3387	chr4:99765902-99929813-	intronic antisense	ENSMUST00000143994	Efcab7	chr4:99829198-99831580+
chr7	143599601	143599681	diffreps_peak_167616	7.48623	80	ENSMUST00000134128	Cars	9.29856	3.26413e-08	5.2068e-07	up	Ensembl	307	chr7:143587149-143599681-	exon sense-overlapping	NM_013742	Cars	chr7:143557230-143600090-
chr2	32298788	32299125	diffreps_peak_95253	4.26907	337	ENSMUST00000149141	Golga2	1.82396	5.38186e-05	0.0003805	up	Ensembl	405	chr2:32298789-32299271+	exon sense-overlapping	NM_133852	Golga2	chr2:32288253-32307921+
chr9	80286461	80286508	diffreps_peak_184970	0.121459	47	ENSMUST00000156199	Myo6	1.03321	0.756033	1	up	Ensembl	635	chr9:80285414-80286508+	exon sense-overlapping	ENSMUST00000127779	Myo6	chr9:80217611-80308050+
chr13	109116235	109116360	diffreps_peak_50013	0.168384	125	ENSMUST00000129374	Pde4d	1.25888	0.678603	1	up	Ensembl	2397	chr13:109116236-109335063+	exon sense-overlapping	ENSMUST00000120671	Pde4d	chr13:109116641-109951387+
chr7	130353441	130353760	diffreps_peak_166728	7.40526	319	ENSMUST00000121836	Gm5903	9.27523	3.93311e-08	5.91752e-07	up	Ensembl	2325	chr7:130352038-130354362-	intron sense-overlapping	ENSMUST00000124096	Fgfr2	chr7:130162451-133123350-
chr4	155842792	155842974	diffreps_peak_129646	0.521547	182	ENSMUST00000143886	Mxra8	1.49978	0.300921	0.758188	up	Ensembl	594	chr4:155842304-155842974+	exon sense-overlapping	ENSMUST00000030947	Mxra8	chr4:155839726-155844088+
chr5	37823821	37824180	diffreps_peak_133096	6.71022	359	ENSMUST00000183013	Msx1	9.21581	1.94886e-07	2.06112e-06	up	Ensembl	1880	chr5:37822703-37824582-	exon sense-overlapping	NM_010835	Msx1	chr5:37820491-37824585-
chr1	135263883	135264060	diffreps_peak_9185	0.311162	177	ENSMUST00000180981	Gm26642	2.20767	0.488471	1	up	Ensembl	2782	chr1:135248561-135266443+	natural antisense	NM_145417	Rnpep	chr1:135262699-135284084-
chr2	122147716	122147840	diffreps_peak_101365	0.63651	124	uc008mag.1	BC002288	1.45642	0.230935	0.63816	up	UCSC_knowngene	1644	chr2:122147717-122149360+	intronic antisense	NM_026251	Patl2	chr2:122120108-122186189-
chr7	45370221	45370346	diffreps_peak_159370	7.03808	125	ENSMUST00000147787	Lin7b	9.10358	9.16058e-08	1.10994e-06	up	Ensembl	644	chr7:45369563-45370346-	exon sense-overlapping	ENSMUST00000003971	Lin7b	chr7:45367891-45370583-
chr5	74535484	74536020	diffreps_peak_135248	0.579038	536	ENSMUST00000135377	Fip1l1	1.41776	0.26361	0.697886	up	Ensembl	4986	chr5:74535485-74540566+	exon sense-overlapping	ENSMUST00000113534	Fip1l1	chr5:74535524-74592430+
chr4	155739381	155739740	diffreps_peak_129607	0.289749	359	ENSMUST00000176526	Tmem240	1.44652	0.513157	1	up	Ensembl	5510	chr4:155734804-155740564+	exon sense-overlapping	ENSMUST00000147721	Tmem240	chr4:155734800-155740142+
chr7	126624921	126625120	diffreps_peak_166051	7.09238	199	ENSMUST00000131174	Nupr1	9.08615	8.08379e-08	1.00697e-06	up	Ensembl	2449	chr7:126623252-126627010-	exon sense-overlapping	NM_019738	Nupr1	chr7:126623246-126625470-
chr10	8885721	8886120	diffreps_peak_13602	0.479336	399	ENSMUST00000180770	Gm26674	1.5659	0.331638	0.807238	up	Ensembl	1491	chr10:8884594-8886880+	natural antisense	NM_175155	Sash1	chr10:8722219-8886070-
chr13	14064061	14064460	diffreps_peak_44238	7.24221	399	ENSMUST00000151182	Arid4b	9.04785	5.72524e-08	7.77146e-07	up	Ensembl	678	chr13:14064055-14120219+	exon sense-overlapping	ENSMUST00000110536	Arid4b	chr13:14063785-14199367+
chr11	5115464	5115523	diffreps_peak_23889	6.54767	59	uc011xrd.1	Emid1	9.02216	2.83352e-07	2.85854e-06	up	UCSC_knowngene	2069	chr11:5106266-5152222-	exon sense-overlapping	ENSMUST00000132328	Emid1	chr11:5106265-5130778-
chr11	102199161	102199360	diffreps_peak_32806	0.595399	199	ENSMUST00000155065	Hdac5	2.28687	0.253864	0.680994	up	Ensembl	695	chr11:102198679-102199493-	exon sense-overlapping	ENSMUST00000107152	Hdac5	chr11:102195751-102230166-
chr1	21577643	21577760	diffreps_peak_1363	7.5829	117	ENSMUST00000134505	Kcnq5	8.96292	2.61274e-08	4.47327e-07	up	Ensembl	662	chr1:21577644-21855902-	exon sense-overlapping	ENSMUST00000173058	Kcnq5	chr1:21402163-21961581-
chr7	25620741	25621040	diffreps_peak_156787	7.16043	299	ENSMUST00000130897	Atp5sl	8.93386	6.91142e-08	8.96767e-07	up	Ensembl	619	chr7:25620537-25622406+	exon sense-overlapping	NM_025504	Atp5sl	chr7:25619493-25625550+
chr3	89168801	89169040	diffreps_peak_112012	0.00450871	239	ENSMUST00000138822	Clk2	1.01918	0.989672	1	up	Ensembl	3168	chr3:89164819-89176919+	exon sense-overlapping	NM_007712	Clk2	chr3:89164805-89177087+
chr11	68811426	68811560	diffreps_peak_28296	0.740174	134	ENSMUST00000124006	Myh10	1.69243	0.181897	0.53616	up	Ensembl	558	chr11:68811427-68813019+	exon sense-overlapping	ENSMUST00000092984	Myh10	chr11:68692316-68816624+
chr11	3193515	3193714	diffreps_peak_23470	0.617862	199	ENSMUST00000146218	Gm12735	1.35269	0.241067	0.657468	up	Ensembl	651	chr11:3193516-3194263-	intergenic
chr6	125162841	125163040	diffreps_peak_152462	0.224471	199	ENSMUST00000182464	Gapdh	1.27261	0.596389	1	up	Ensembl	471	chr6:125162771-125163339-	exon sense-overlapping	NM_008084	Gapdh	chr6:125161852-125165773-
chr5	108370786	108371040	diffreps_peak_137380	4.40981	254	uc008ynw.2	AK031816	1.3152	3.89215e-05	0.000279836	up	UCSC_knowngene	2530	chr5:108367791-108372807+	exon sense-overlapping	ENSMUST00000100944	Gm10419	chr5:108369858-108378239+
chr5	121206637	121206810	diffreps_peak_139443	0.681939	173	ENSMUST00000140515	Rpl6	1.40459	0.207999	0.591643	up	Ensembl	411	chr5:121206638-121207384+	exon sense-overlapping	ENSMUST00000031617	Rpl6	chr5:121204481-121209241+
chr2	30981961	30982180	diffreps_peak_94990	0.0542794	219	ENSMUST00000156325	BC005624	1.1382	0.882512	1	up	Ensembl	1064	chr2:30980903-30982201-	exon sense-overlapping	ENSMUST00000028205	BC005624	chr2:30972833-30981941-
chr3	103750861	103751014	diffreps_peak_113337	0.0823995	153	ENSMUST00000126351	Hipk1	1.1986	0.827181	1	up	Ensembl	545	chr3:103749363-103751014-	exon sense-overlapping	NM_001301304	Hipk1	chr3:103739815-103791563-
chr2	90483961	90484240	diffreps_peak_98992	0.296812	279	ENSMUST00000126219	4933423P22Rik	1.68113	0.50488	1	up	Ensembl	4595	chr2:90479236-90485084+	intronic antisense	NM_008982	Ptprj	chr2:90432889-90580647-
chr6	83188881	83189268	diffreps_peak_148688	1.70469	387	ENSMUST00000123313	Dctn1	1.14068	0.0197382	0.087896	up	Ensembl	718	chr6:83188611-83189607+	exon sense-overlapping	ENSMUST00000113918	Dctn1	chr6:83179589-83200116+
chr18	67321721	67322060	diffreps_peak_85598	7.01555	339	NR_033214	B430212C06Rik	8.92413	9.64839e-08	1.15686e-06	up	RefSeq	2623	chr18:67321209-67344103-	intronic antisense	ENSMUST00000025404	Cidea	chr18:67343564-67367794+
chr11	116545750	116545940	diffreps_peak_34574	7.91313	190	ENSMUST00000147851	Ube2o	8.91252	1.22143e-08	2.86413e-07	up	Ensembl	461	chr11:116545751-116548841-	exon sense-overlapping	ENSMUST00000082152	Ube2o	chr11:116537740-116581447-
chr7	44928541	44928643	diffreps_peak_159132	0.815287	102	ENSMUST00000169527	Ap2a1	1.52381	0.153007	0.470639	up	Ensembl	342	chr7:44916019-44928643-	exon sense-overlapping	NM_001077264	Ap2a1	chr7:44900373-44929490-
chr11	70982681	70983007	diffreps_peak_29041	0.345481	326	ENSMUST00000179291	C1qbp	1.5932	0.451356	0.972678	up	Ensembl	1998	chr11:70981010-70983007-	exon sense-overlapping	NM_007573	C1qbp	chr11:70977846-70983026-
chr17	47593441	47593660	diffreps_peak_78124	0.0845954	219	ENSMUST00000182281	Ccnd3	1.20929	0.823009	1	up	Ensembl	3858	chr17:47593436-47598174+	exon sense-overlapping	ENSMUST00000182846	Ccnd3	chr17:47594756-47598863+
chr6	54487905	54488020	diffreps_peak_146929	0.0538341	115	ENSMUST00000131043	Wipf3	1.03059	0.883417	1	up	Ensembl	2660	chr6:54487906-54491542+	exon sense-overlapping	NM_001167861	Wipf3	chr6:54452883-54503768+
chr4	43686010	43686220	diffreps_peak_119698	0.62871	210	ENSMUST00000134869	Tmem8b	2.07265	0.23512	0.646487	up	Ensembl	1243	chr4:43669556-43686413+	exon sense-overlapping	ENSMUST00000107864	Tmem8b	chr4:43669287-43692668+
chr18	82339021	82339130	diffreps_peak_86595	1.02048	109	ENSMUST00000078739	Gm17383	2.19635	0.095394	0.329178	up	Ensembl	1041	chr18:82338774-82339816+	intergenic
chr10	116473162	116473220	diffreps_peak_22005	0.0498724	58	NR_130644	Kcnmb4os2	1.1082	0.891513	1	up	RefSeq	1615	chr10:116473163-116474986+	natural antisense	NM_021452	Kcnmb4	chr10:116417868-116473523-
chr4	151985641	151985861	diffreps_peak_128994	0.519079	220	ENSMUST00000146471	Thap3	1.26006	0.302636	0.760702	up	Ensembl	501	chr4:151985459-151988980-	exon sense-overlapping	ENSMUST00000105665	Thap3	chr4:151982802-151988970-
chr8	84838401	84838620	diffreps_peak_175038	0.297077	219	ENSMUST00000125711	Rad23a	1.29012	0.504572	1	up	Ensembl	657	chr8:84838299-84840636-	exon sense-overlapping	NM_001297607	Rad23a	chr8:84834652-84840665-
chr1	21960621	21961060	diffreps_peak_1413	0.695053	439	ENSMUST00000181002	Gm26580	1.5314	0.201812	0.578511	up	Ensembl	2095	chr1:21959842-21962530+	natural antisense	NM_023872	Kcnq5	chr1:21398403-21961942-
chr15	98657941	98658340	diffreps_peak_65313	0.141561	399	ENSMUST00000159170	Ddx23	1.08711	0.721837	1	up	Ensembl	610	chr15:98657893-98662889-	exon sense-overlapping	NM_001080981	Ddx23	chr15:98645507-98662889-
chr5	142661024	142661160	diffreps_peak_142679	0.714762	136	ENSMUST00000153936	Wipi2	1.80447	0.192858	0.559827	up	Ensembl	3244	chr5:142629591-142662709+	exon sense-overlapping	NM_178398	Wipi2	chr5:142629584-142669370+
chr14	55579594	55580480	diffreps_peak_54262	2.19014	886	ENSMUST00000173544	Psme1	1.43166	0.00645451	0.0326105	up	Ensembl	1986	chr14:55578456-55581528+	exon sense-overlapping	ENSMUST00000174563	Psme1	chr14:55578538-55580942+
chr5	127615981	127616200	diffreps_peak_140624	6.86497	219	ENSMUST00000182841	Slc15a4	8.85696	1.36467e-07	1.53029e-06	up	Ensembl	2936	chr5:127614446-127617381-	exon sense-overlapping	ENSMUST00000031367	Slc15a4	chr5:127595664-127617416-
chr5	136373321	136373461	diffreps_peak_141863	9.68811	140	ENSMUST00000177414	Cux1	1.12547	2.05065e-10	4.86328e-08	up	Ensembl	347	chr5:136314306-136373461-	exon sense-overlapping	NM_001291240	Cux1	chr5:136248135-136565981-
chr11	51846541	51846700	diffreps_peak_26740	6.82199	159	ENSMUST00000151277	Phf15	8.76879	1.50666e-07	1.66133e-06	up	Ensembl	4552	chr11:51842301-51857125-	exon sense-overlapping	ENSMUST00000109091	Phf15	chr11:51813460-51857396-
chr12	55395861	55396140	diffreps_peak_38697	0.157658	279	ENSMUST00000161190	Rpl18a-ps1	1.89773	0.695572	1	up	Ensembl	523	chr12:55395707-55396229-	intronic antisense	ENSMUST00000163070	Psma6	chr12:55384222-55418310+
chr4	145690301	145690478	diffreps_peak_128082	0.109308	177	ENSMUST00000119920	Gm13239	1.11118	0.777486	1	up	Ensembl	637	chr4:145689842-145690478+	intron sense-overlapping	NM_001103158	Gm13242	chr4:145670697-145704437+
chr7	4133081	4133460	diffreps_peak_154126	0.218619	379	ENSMUST00000126971	Ttyh1	1.14723	0.604478	1	up	Ensembl	2513	chr7:4119530-4134949+	exon sense-overlapping	NM_001001454	Ttyh1	chr7:4119533-4136241+
chr8	83570681	83570998	diffreps_peak_174481	0.0556271	317	ENSMUST00000127162	Ndufb7	1.01912	0.879778	1	up	Ensembl	4435	chr8:83566758-83571626+	exon sense-overlapping	NM_025843	Ndufb7	chr8:83566758-83571623+
chr15	78899666	78899961	diffreps_peak_63039	0.903144	295	ENSMUST00000134703	Sh3bp1	3.50184	0.124984	0.402472	up	Ensembl	2762	chr15:78899667-78919032+	exon sense-overlapping	NM_020271	Pdxp	chr15:78913919-78919517+
chr11	105240360	105240520	diffreps_peak_33312	1.20343	160	ENSMUST00000123050	Tlk2	1.44754	0.0625992	0.233461	up	Ensembl	603	chr11:105207416-105240645+	exon sense-overlapping	NM_001112705	Tlk2	chr11:105181527-105283959+
chr7	52005542	52005714	diffreps_peak_160114	0.11884	172	NR_027704	Svip	1.23092	0.760607	1	up	RefSeq	2968	chr7:51997161-52005714-	exon sense-overlapping	ENSMUST00000098414	Svip	chr7:51997165-52006018-
chr2	163645001	163645200	diffreps_peak_104656	0.298714	199	NR_028113	0610039K10Rik	1.21661	0.502673	1	up	RefSeq	951	chr2:163644850-163645800+	natural antisense	NM_012032	Serinc3	chr2:163623273-163645143-
chr2	130564221	130564431	diffreps_peak_101861	0.193041	210	ENSMUST00000046149	Mrps26	1.2191	0.641149	1	up	Ensembl	1057	chr2:130563742-130565394+	exon sense-overlapping	NM_207207	Mrps26	chr2:130563757-130565394+
chr7	141447907	141448100	diffreps_peak_167365	0.609374	193	ENSMUST00000140099	Rplp2	1.34844	0.245825	0.666321	up	Ensembl	786	chr7:141447631-141448616+	exon sense-overlapping	NM_026020	Rplp2	chr7:141447650-141451342+
chr3	96168901	96169280	diffreps_peak_112727	9.53392	379	ENSMUST00000180958	Gm17690	8.73051	2.92468e-10	6.42034e-08	up	Ensembl	3467	chr3:96167464-96172414-	natural antisense	ENSMUST00000054356	Mtmr11	chr3:96162004-96171718+
chr4	130013635	130013891	diffreps_peak_125960	0.806921	256	ENSMUST00000136416	Bai2	2.13452	0.155984	0.477655	up	Ensembl	355	chr4:130013636-130014582+	exon sense-overlapping	NM_001199696	Adgrb2	chr4:129985078-130022633+
chr7	44336015	44336060	diffreps_peak_158699	0.0075969	45	ENSMUST00000134470	Shank1	1.12873	0.98266	1	up	Ensembl	608	chr7:44336016-44343738+	exon sense-overlapping	ENSMUST00000107935	Shank1	chr7:44312688-44357487+
chr1	63364719	63364780	diffreps_peak_4055	7.24281	61	ENSMUST00000120413	Gm11605	8.63441	5.71728e-08	7.76151e-07	up	Ensembl	646	chr1:63364720-63365365-	intergenic
chr4	133719359	133719653	diffreps_peak_126472	2.89373	294	ENSMUST00000168582	Arid1a	1.83234	0.00127723	0.00742846	up	Ensembl	521	chr4:133719360-133720776-	exon sense-overlapping	ENSMUST00000145664	Arid1a	chr4:133679008-133753611-
chr13	8870721	8871080	diffreps_peak_43885	6.67138	359	uc007pkm.1	AK016837	8.63031	2.13119e-07	2.22609e-06	up	UCSC_knowngene	1765	chr13:8870341-8872105+	natural antisense	ENSMUST00000164183	Wdr37	chr13:8852669-8870979-
chr11	67682581	67682733	diffreps_peak_28169	0.0366172	152	ENSMUST00000133367	Gas7	1.01361	0.919142	1	up	Ensembl	789	chr11:67682172-67683564+	exon sense-overlapping	NM_001109657	Gas7	chr11:67586500-67688992+
chr13	98316881	98317080	diffreps_peak_49414	7.06927	199	ENSMUST00000062252	Gm9828	8.58312	8.52561e-08	1.04883e-06	up	Ensembl	883	chr13:98316422-98317304+	natural antisense	NM_145455	Btf3	chr13:98309897-98316967-
chr18	60821632	60821764	diffreps_peak_85066	1.86706	132	uc012bdm.1	Tcof1	1.89721	0.0135813	0.0631933	up	UCSC_knowngene	4065	chr18:60816001-60848964-	exon sense-overlapping	ENSMUST00000177343	Tcof1	chr18:60838683-60848446-
chr7	114414881	114415161	diffreps_peak_165066	6.84269	280	NR_029437	4933406I18Rik	8.55396	1.4365e-07	1.59681e-06	up	RefSeq	904	chr7:114315479-114415161-	bidirectional	NM_011055	Pde3b	chr7:114415254-114537937+
chr6	83171641	83171840	diffreps_peak_148665	12.2545	199	uc009cnb.1	AK038985	8.46594	5.5657e-13	4.85234e-10	up	UCSC_knowngene	1405	chr6:83169804-83172554-	intronic antisense	NM_001198866	Dctn1	chr6:83165924-83200117+
chr17	48400381	48400580	diffreps_peak_78232	7.36497	199	ENSMUST00000161686	Nfya	8.37459	4.3155e-08	6.32983e-07	up	Ensembl	2779	chr17:48397927-48409750-	exon sense-overlapping	NM_001110832	Nfya	chr17:48386885-48409820-
chr19	6372517	6372880	diffreps_peak_88041	0.227903	363	ENSMUST00000131677	Sf1	1.20434	0.591694	1	up	Ensembl	408	chr19:6372413-6372921+	exon sense-overlapping	NM_001110791	Sf1	chr19:6363690-6378038+
chr3	95133621	95133773	diffreps_peak_112603	0.00817669	152	ENSMUST00000174859	Scnm1	1.00741	0.981349	1	up	Ensembl	564	chr3:95129720-95133773-	exon sense-overlapping	NM_027013	Scnm1	chr3:95129719-95134012-
chr11	50149701	50150100	diffreps_peak_26562	1.49207	399	ENSMUST00000137852	Tbc1d9b	1.72701	0.0322053	0.13385	up	Ensembl	578	chr11:50145183-50150206+	exon sense-overlapping	NM_001290760	Tbc1d9b	chr11:50131360-50172785+
chr11	6007181	6007580	diffreps_peak_24021	1.2511	399	uc007hxv.1	BC019819	1.35005	0.0560923	0.213726	up	UCSC_knowngene	2041	chr11:6006288-6008328+	intronic antisense	NM_007595	Camk2b	chr11:5969666-6065748-
chr4	119281521	119281652	diffreps_peak_124487	0.711222	131	ENSMUST00000144992	Ybx1	1.32382	0.194436	0.563146	up	Ensembl	551	chr4:119281143-119282186-	exon sense-overlapping	ENSMUST00000127737	Ybx1	chr4:119277990-119282792-
chr11	121298515	121298720	diffreps_peak_35715	1.27877	205	ENSMUST00000151492	Foxk2	1.49032	0.0526294	0.20285	up	Ensembl	607	chr11:121298516-121299850+	exon sense-overlapping	ENSMUST00000106113	Foxk2	chr11:121259990-121309896+
chr4	142346008	142346100	diffreps_peak_127839	6.52336	92	ENSMUST00000125582	Gm13052	8.22031	2.9967e-07	3.00288e-06	up	Ensembl	769	chr4:142307765-142346475-	intergenic
chr10	77982761	77983000	diffreps_peak_18545	0.788141	239	ENSMUST00000123999	1810043G02Rik	1.4062	0.162877	0.493479	up	Ensembl	4492	chr10:77978671-77985434+	exon sense-overlapping	ENSMUST00000105398	1810043G02Rik	chr10:77978673-77986905+
chr2	156177361	156177620	diffreps_peak_103929	1.23084	259	ENSMUST00000137297	Rbm39	1.65415	0.0587703	0.222058	up	Ensembl	707	chr2:156172954-156177901-	exon sense-overlapping	NM_133242	Rbm39	chr2:156147241-156180238-
chr1	119706101	119706313	diffreps_peak_7863	0.877313	212	ENSMUST00000168808	Ptpn4	2.33631	0.132644	0.421555	up	Ensembl	463	chr1:119706024-119715993-	exon sense-overlapping	ENSMUST00000163435	Ptpn4	chr1:119689801-119837347-
chr5	76588697	76588924	diffreps_peak_135340	6.7364	227	ENSMUST00000130651	Cep135	8.18033	1.83484e-07	1.95701e-06	up	Ensembl	5629	chr5:76588698-76644908+	exon sense-overlapping	NM_199032	Cep135	chr5:76591714-76646466+
chr13	54556361	54556651	diffreps_peak_46743	1.27808	290	ENSMUST00000143173	4833439L19Rik	1.77595	0.0527132	0.203109	up	Ensembl	874	chr13:54556194-54565291-	exon sense-overlapping	ENSMUST00000026989	4833439L19Rik	chr13:54551218-54565435-
chr7	109896946	109897140	diffreps_peak_164665	0.750617	194	ENSMUST00000156858	Dennd5a	1.89663	0.177576	0.526545	up	Ensembl	642	chr7:109896380-109897556-	exon sense-overlapping	NM_021494	Dennd5a	chr7:109893781-109960422-
chr11	106152201	106152394	diffreps_peak_33452	0.572192	193	ENSMUST00000124449	Map3k3	1.86744	0.267799	0.703946	up	Ensembl	520	chr11:106152064-106154140+	exon sense-overlapping	ENSMUST00000002044	Map3k3	chr11:106084613-106155446+
chr19	6342743	6342874	diffreps_peak_88008	11.6646	131	ENSMUST00000148410	Map4k2	8.12576	2.16454e-12	1.19972e-09	up	Ensembl	647	chr19:6341216-6342874+	exon sense-overlapping	ENSMUST00000130382	Map4k2	chr19:6341224-6345742+
chr2	27453401	27453600	diffreps_peak_94444	0.138836	199	ENSMUST00000130932	Brd3	1.21318	0.726381	1	up	Ensembl	2893	chr2:27452996-27475653-	exon sense-overlapping	NM_001113574	Brd3	chr2:27445581-27475673-
chr19	44069501	44069744	diffreps_peak_90581	0.0927407	243	ENSMUST00000170577	Erlin1	1.31515	0.807717	1	up	Ensembl	2083	chr19:44066072-44069744-	exon sense-overlapping	ENSMUST00000169092	Erlin1	chr19:44069316-44069690-
chr2	136007822	136008000	diffreps_peak_102316	0.716486	178	ENSMUST00000147122	Plcb4	1.17481	0.192094	0.558178	up	Ensembl	389	chr2:136007230-136008043+	exon sense-overlapping	ENSMUST00000147744	Plcb4	chr2:135987876-136014593+
chr4	43031021	43031220	diffreps_peak_119541	1.02441	199	ENSMUST00000127645	Stoml2	1.4482	0.0945342	0.326829	up	Ensembl	657	chr4:43030041-43031358-	exon sense-overlapping	ENSMUST00000136326	Stoml2	chr4:43028229-43031456-
chr17	5040577	5040774	diffreps_peak_73310	0.665789	197	ENSMUST00000146703	Arid1b	1.57005	0.215879	0.608189	up	Ensembl	1083	chr17:5040578-5127640+	exon sense-overlapping	ENSMUST00000092723	Arid1b	chr17:4994939-5343505+
chr6	83194343	83194591	diffreps_peak_148711	0.69765	248	ENSMUST00000127824	Dctn1	1.18695	0.200609	0.575924	up	Ensembl	539	chr6:83194344-83195580+	exon sense-overlapping	ENSMUST00000113913	Dctn1	chr6:83165951-83200117+
chr17	28600161	28600380	diffreps_peak_75864	0.0879576	219	ENSMUST00000126683	Srpk1	1.06638	0.816662	1	up	Ensembl	4956	chr17:28595463-28600886-	exon sense-overlapping	ENSMUST00000130643	Srpk1	chr17:28587648-28622521-
chr19	5113661	5113850	diffreps_peak_87577	0.390938	189	ENSMUST00000135827	Klc2	1.22358	0.406502	0.91519	up	Ensembl	411	chr19:5113510-5114010-	exon sense-overlapping	ENSMUST00000025798	Klc2	chr19:5107746-5118300-
chr1	85105945	85106200	diffreps_peak_5625	0.00803171	255	uc007btk.1	BC100303	1.07385	0.981676	1	up	UCSC_knowngene	2217	chr1:85105946-85114035+	natural antisense	ENSMUST00000161267	C130026I21Rik	chr1:85112267-85270178-
chr11	119916730	119916840	diffreps_peak_35268	6.82138	110	ENSMUST00000137055	Chmp6	8.10073	1.50877e-07	1.66336e-06	up	Ensembl	356	chr11:119916731-119918628+	exon sense-overlapping	ENSMUST00000026434	Chmp6	chr11:119913810-119919548+
chr6	87904261	87904460	diffreps_peak_149170	6.86642	199	ENSMUST00000149907	Copg1	8.09261	1.36013e-07	1.52617e-06	up	Ensembl	5348	chr6:87896006-87912530+	exon sense-overlapping	ENSMUST00000113607	Copg1	chr6:87887814-87913595+
chr5	121802001	121802265	diffreps_peak_139582	0.317357	264	ENSMUST00000162459	Atxn2	1.2777	0.481552	1	up	Ensembl	754	chr5:121801746-121810951+	exon sense-overlapping	ENSMUST00000162995	Atxn2	chr5:121802230-121814475+
chr14	54649541	54649820	diffreps_peak_53963	0.624925	279	ENSMUST00000167495	Acin1	2.15121	0.237178	0.650479	up	Ensembl	1352	chr14:54645211-54650268-	exon sense-overlapping	NM_001085473	Acin1	chr14:54642161-54686931-
chr2	120025061	120025380	diffreps_peak_101045	8.17878	319	ENSMUST00000141511	Gm13999	8.0185	6.62558e-09	2.08955e-07	up	Ensembl	969	chr2:120024807-120027453-	natural antisense	ENSMUST00000066058	Mapkbp1	chr2:119972699-120027408+
chr11	101125202	101125400	diffreps_peak_32600	0.153399	198	ENSMUST00000137844	Tubg1	1.28613	0.702426	1	up	Ensembl	852	chr11:101124500-101125828+	exon sense-overlapping	ENSMUST00000043680	Tubg1	chr11:101119938-101126419+
chr15	89165181	89165400	diffreps_peak_64478	6.59367	219	ENSMUST00000131062	Plxnb2	8.01199	2.54879e-07	2.604e-06	up	Ensembl	605	chr15:89164891-89165797-	exon sense-overlapping	NM_001159521	Plxnb2	chr15:89155546-89173951-
chr17	28201321	28201700	diffreps_peak_75804	2.06105	379	ENSMUST00000145313	Zfp523	1.6367	0.00868866	0.0425495	up	Ensembl	3350	chr17:28177207-28205886+	exon sense-overlapping	ENSMUST00000155030	Zfp523	chr17:28202291-28205162+
chr7	142537266	142537580	diffreps_peak_167505	0.912331	314	ENSMUST00000141098	Mrpl23	2.49324	0.122368	0.398388	up	Ensembl	693	chr7:142536104-142537910+	exon sense-overlapping	ENSMUST00000038675	Mrpl23	chr7:142533012-142540747+
chr19	6365663	6365860	diffreps_peak_88032	0.281111	197	ENSMUST00000131083	Sf1	1.11226	0.523466	1	up	Ensembl	489	chr19:6363922-6365955+	exon sense-overlapping	ENSMUST00000155973	Sf1	chr19:6364557-6372619+
chr5	24595866	24596074	diffreps_peak_131489	0.387845	208	ENSMUST00000140744	Smarcd3	1.61611	0.409407	0.918717	up	Ensembl	583	chr5:24595867-24601900-	exon sense-overlapping	NM_025891	Smarcd3	chr5:24592622-24602002-
chr5	123515813	123516060	diffreps_peak_139905	0.109801	247	ENSMUST00000145152	Diablo	1.15374	0.776602	1	up	Ensembl	2577	chr5:123515814-123524136-	exon sense-overlapping	ENSMUST00000111587	Diablo	chr5:123511705-123524176-
chr11	74077518	74077840	diffreps_peak_29247	5.80784	322	ENSMUST00000119927	Gm12331	7.9927	1.55654e-06	1.35059e-05	up	Ensembl	622	chr11:74077519-74078140-	intronic antisense	ENSMUST00000116546	Zfp616	chr11:74070185-74083039+
chr11	51857031	51857125	diffreps_peak_26744	0.277674	94	ENSMUST00000151277	Phf15	2.13973	0.527626	1	up	Ensembl	4552	chr11:51842301-51857125-	exon sense-overlapping	ENSMUST00000020655	Phf15	chr11:51813455-51857653-
chr7	126880581	126880960	diffreps_peak_166177	6.09765	379	ENSMUST00000156273	Taok2	1.57488	7.9864e-07	7.3098e-06	up	Ensembl	2892	chr7:126879797-126882959-	exon sense-overlapping	NM_001163774	Taok2	chr7:126865677-126884967-
chr1	14865581	14865965	diffreps_peak_842	6.00438	384	ENSMUST00000121367	Rpl5-ps1	7.91613	9.8997e-07	8.89582e-06	up	Ensembl	894	chr1:14865072-14865965+	intergenic
chr11	60714122	60714447	diffreps_peak_27663	0.79391	325	ENSMUST00000154141	Flii	1.42938	0.160728	0.488629	up	Ensembl	458	chr11:60714123-60714721-	natural antisense	ENSMUST00000108719	Llgl1	chr11:60699845-60714186+
chr16	81261841	81262015	diffreps_peak_72003	0.134451	174	ENSMUST00000122722	Gm26023	1.18785	0.733752	1	up	Ensembl	313	chr16:81261703-81262015-	intronic antisense	NM_010954	Ncam2	chr16:81200697-81597805+
chr2	118833721	118834020	diffreps_peak_100920	0.248416	299	ENSMUST00000133534	Gm14091	1.28514	0.564397	1	up	Ensembl	874	chr2:118829874-118834122-	natural antisense	ENSMUST00000110842	Knstrn	chr2:118814233-118834158+
chr6	137749224	137749429	diffreps_peak_153220	0.256658	205	ENSMUST00000137235	Strap	1.16748	0.553785	1	up	Ensembl	331	chr6:137749225-137750676+	exon sense-overlapping	ENSMUST00000064910	Strap	chr6:137735078-137751932+
chr5	121373901	121374067	diffreps_peak_139521	0.450583	166	ENSMUST00000156158	Trafd1	1.6951	0.354338	0.842549	up	Ensembl	3083	chr5:121371725-121378823-	exon sense-overlapping	NM_172275	Trafd1	chr5:121371725-121385615-
chr7	3645267	3645880	diffreps_peak_154019	1.26752	613	uc009evk.3	AK031165	1.79155	0.0540103	0.207107	up	UCSC_knowngene	4313	chr7:3645268-3649580+	exon sense-overlapping	NM_146176	Cnot3	chr7:3645269-3661109+
chr4	14170561	14170911	diffreps_peak_117148	4.39452	350	ENSMUST00000120191	Gm11824	7.91525	4.03163e-05	0.00028927	up	Ensembl	846	chr4:14170066-14170911+	intergenic
chr4	125007479	125007740	diffreps_peak_125091	11.8103	261	ENSMUST00000140698	Rspo1	7.79923	1.54761e-12	9.62284e-10	up	Ensembl	446	chr4:125007480-125008525+	exon sense-overlapping	ENSMUST00000030687	Rspo1	chr4:124986430-125009099+
chr8	70534482	70534800	diffreps_peak_173318	0.968519	318	ENSMUST00000123052	Fkbp8	1.57533	0.107518	0.362338	up	Ensembl	734	chr8:70531734-70534956+	exon sense-overlapping	NM_010223	Fkbp8	chr8:70527743-70535328+
chr11	30102981	30103300	diffreps_peak_25233	0.413553	319	ENSMUST00000133466	Sptbn1	1.17479	0.385875	0.887723	up	Ensembl	3084	chr11:30101513-30105610-	exon sense-overlapping	ENSMUST00000011877	Sptbn1	chr11:30099396-30219772-
chr8	88357531	88357594	diffreps_peak_175299	1.86372	63	ENSMUST00000135471	Brd7	1.54332	0.013686	0.0636228	up	Ensembl	511	chr8:88357532-88362014-	exon sense-overlapping	ENSMUST00000034085	Brd7	chr8:88331059-88362194-
chr4	145774718	145774880	diffreps_peak_128089	6.75408	162	ENSMUST00000117481	Gm13243	7.79107	1.76165e-07	1.89312e-06	up	Ensembl	565	chr4:145774719-145775283+	intergenic
chr2	49752189	49752353	diffreps_peak_96568	0.131313	164	ENSMUST00000132968	Kif5c	1.0806	0.739073	1	up	Ensembl	480	chr2:49752190-49758908+	exon sense-overlapping	NM_008449	Kif5c	chr2:49619314-49774778+
chr2	30108220	30108400	diffreps_peak_94841	0.0712382	180	ENSMUST00000139128	Zer1	1.03728	0.848715	1	up	Ensembl	3097	chr2:30106800-30110773-	exon sense-overlapping	ENSMUST00000113677	Zer1	chr2:30097283-30124582-
chr9	71630861	71631140	diffreps_peak_184423	6.75156	279	ENSMUST00000136044	Cgnl1	7.72554	1.77191e-07	1.90148e-06	up	Ensembl	771	chr9:71630338-71631330-	exon sense-overlapping	ENSMUST00000121322	Cgnl1	chr9:71626509-71771602-
chr19	4112661	4112876	diffreps_peak_87226	0.866472	215	ENSMUST00000125596	Pitpnm1	2.32782	0.135997	0.430041	up	Ensembl	1038	chr19:4112320-4113965+	natural antisense	NM_001276284	Aip	chr19:4113756-4121575-
chr2	91177636	91177820	diffreps_peak_99089	0.253531	184	ENSMUST00000135715	Madd	1.21129	0.557788	1	up	Ensembl	1092	chr2:91177637-91183837-	exon sense-overlapping	ENSMUST00000099725	Madd	chr2:91137360-91179321-
chr7	27434201	27434369	diffreps_peak_157069	0.0561626	168	ENSMUST00000138087	Sptbn4	1.06312	0.878693	1	up	Ensembl	421	chr7:27433136-27434369-	exon sense-overlapping	NM_032610	Sptbn4	chr7:27356383-27446589-
chr3	61461881	61462560	diffreps_peak_110304	0.287599	679	ENSMUST00000182720	Gm8349	1.32387	0.515705	1	up	Ensembl	1003	chr3:61461859-61462861-	intergenic
chr11	69903521	69903719	diffreps_peak_28704	0.017083	198	ENSMUST00000177160	Neurl4	1.00284	0.961429	1	up	Ensembl	1438	chr11:69902027-69905597+	exon sense-overlapping	ENSMUST00000177476	Neurl4	chr11:69901816-69913515+
chr17	34853701	34853869	diffreps_peak_76687	0.0696966	168	ENSMUST00000173775	Nelfe	1.08786	0.851733	1	up	Ensembl	499	chr17:34852608-34853869+	exon sense-overlapping	ENSMUST00000173357	Nelfe	chr17:34850398-34856254+
chr11	103267337	103267520	diffreps_peak_33142	7.04521	183	ENSMUST00000139621	1700028N14Rik	7.67946	9.01145e-08	1.09654e-06	up	Ensembl	747	chr11:103264860-103267745-	exon sense-overlapping	NM_016896	Map3k14	chr11:103219764-103267401-
chr2	32245321	32245677	diffreps_peak_95235	6.8664	356	ENSMUST00000132853	Pomt1	7.67881	1.36021e-07	1.52619e-06	up	Ensembl	654	chr2:32245290-32248691+	exon sense-overlapping	ENSMUST00000036473	Pomt1	chr2:32236590-32255005+
chr15	84065261	84065379	diffreps_peak_64099	0.797041	118	ENSMUST00000122836	Efcab6	2.09871	0.159573	0.485999	up	Ensembl	381	chr15:84018668-84065379-	exon sense-overlapping	ENSMUST00000156187	Efcab6	chr15:83866712-84065349-
chr10	80135374	80135588	diffreps_peak_18952	1.18423	214	ENSMUST00000132317	Dos	1.72388	0.0654287	0.242327	up	Ensembl	663	chr10:80133074-80135588-	exon sense-overlapping	ENSMUST00000170219	Dos	chr10:80130451-80137387-
chr15	76297181	76297492	diffreps_peak_62480	5.9689	311	ENSMUST00000170261	Oplah	7.67803	1.07424e-06	9.58801e-06	up	Ensembl	792	chr15:76296603-76297492-	natural antisense	ENSMUST00000163991	Smpd5	chr15:76294434-76296896+
chr7	3653161	3653360	diffreps_peak_154025	0.142782	199	ENSMUST00000135977	Cnot3	1.12432	0.71981	1	up	Ensembl	1828	chr7:3651808-3658741+	exon sense-overlapping	ENSMUST00000038913	Cnot3	chr7:3645352-3661100+
chr17	46747361	46747544	diffreps_peak_77960	0.581644	183	ENSMUST00000148656	Cnpy3	1.23976	0.262033	0.694912	up	Ensembl	531	chr17:46747219-46752177-	exon sense-overlapping	ENSMUST00000059844	Cnpy3	chr17:46735705-46752214-
chr4	132544461	132544751	diffreps_peak_126207	0.860354	290	ENSMUST00000142281	Dnajc8	1.10734	0.137926	0.4348	up	Ensembl	1837	chr4:132535567-132553661+	exon sense-overlapping	NM_172400	Dnajc8	chr4:132535559-132553742+
chr7	13052641	13052860	diffreps_peak_154961	0.70418	219	ENSMUST00000182293	Mzf1	2.37001	0.197615	0.569974	up	Ensembl	3749	chr7:13043149-13054341-	exon sense-overlapping	ENSMUST00000182490	Mzf1	chr7:13043147-13053684-
chr17	34906150	34906625	diffreps_peak_76716	1.03868	475	ENSMUST00000145624	Ehmt2	1.2999	0.091479	0.318305	up	Ensembl	624	chr17:34905910-34906625+	exon sense-overlapping	ENSMUST00000013931	Ehmt2	chr17:34898971-34914051+
chr16	4935461	4935660	diffreps_peak_66443	0.0247011	199	NR_037666	Gm16861	1.02058	0.944711	1	up	RefSeq	1531	chr16:4935164-4939585-	intronic antisense	NM_029657	Mgrn1	chr16:4886100-4938296+
chr7	141457201	141457505	diffreps_peak_167371	0.348626	304	ENSMUST00000169723	Pnpla2	1.26529	0.448099	0.968864	up	Ensembl	920	chr7:141457018-141458686+	exon sense-overlapping	NM_001163689	Pnpla2	chr7:141455188-141460743+
chr7	62207401	62207440	diffreps_peak_161042	0.103346	39	uc009hfe.1	AK086712	1.0627	0.788231	1	up	UCSC_knowngene	3054	chr7:62094506-62209530-	intergenic
chr4	12233461	12233780	diffreps_peak_117045	0.174239	319	ENSMUST00000125165	Gm11847	1.25514	0.669516	1	up	Ensembl	1119	chr4:12232833-12233951+	intergenic
chr14	55072961	55073180	diffreps_peak_54138	0.109135	219	uc007txy.2	Thtpa	1.04532	0.777794	1	up	UCSC_knowngene	4251	chr14:55055493-55098995+	natural antisense	ENSMUST00000170285	Ap1g2	chr14:55098855-55106147-
chr7	96436961	96437200	diffreps_peak_163392	1.08391	239	ENSMUST00000129445	Tenm4	1.5369	0.08243	0.292935	up	Ensembl	2527	chr7:96210146-96438966+	exon sense-overlapping	ENSMUST00000138760	Tenm4	chr7:96210146-96550300+
chr3	88214484	88214667	diffreps_peak_111779	6.73648	183	uc008puh.1	AK140632	7.64387	1.83452e-07	1.95676e-06	up	UCSC_knowngene	1088	chr3:88214485-88221860+	intergenic
chr8	20122306	20122488	diffreps_peak_169644	0.0781054	182	uc029wqr.1	AK009182	1.15771	0.8354	1	up	UCSC_knowngene	1377	chr8:20122307-20148118+	exon sense-overlapping	ENSMUST00000179299	Gm21811	chr8:20136455-20150494+
chr2	165861884	165862000	diffreps_peak_105043	0.31868	116	ENSMUST00000139907	Zmynd8	1.13012	0.480087	1	up	Ensembl	584	chr2:165842783-165862005-	exon sense-overlapping	NM_001252587	Zmynd8	chr2:165827124-165884838-
chr19	57360521	57360740	diffreps_peak_91748	0.110821	219	NR_040316	B230217O12Rik	1.01969	0.774782	1	up	RefSeq	1954	chr19:57323197-57360899-	bidirectional	NM_145505	Fam160b1	chr19:57361009-57389594+
chr2	38353481	38353693	diffreps_peak_95942	0.116853	212	ENSMUST00000149664	Lhx2	1.12938	0.764095	1	up	Ensembl	701	chr2:38339488-38353693+	exon sense-overlapping	ENSMUST00000000253	Lhx2	chr2:38350759-38369733+
chr6	30805661	30805880	diffreps_peak_145248	0.0225669	219	uc009bfw.1	Mit1/Lb9	1.0066	0.949365	1	up	UCSC_knowngene	2769	chr6:30804784-30807552+	intronic antisense	NM_017478	Copg2	chr6:30747554-30896794-
chr11	85775541	85775680	diffreps_peak_30691	5.6313	139	NR_046194	Bcas3os2	7.6146	2.33721e-06	1.97244e-05	up	RefSeq	658	chr11:85766833-85775680-	intronic antisense	NM_001166643	Bcas3	chr11:85353164-85826058+
chr16	20707572	20707720	diffreps_peak_68166	0.132672	148	ENSMUST00000153075	Clcn2	1.06767	0.736763	1	up	Ensembl	3511	chr16:20702998-20716164-	exon sense-overlapping	NM_009900	Clcn2	chr16:20702966-20716636-
chr11	3234421	3234645	diffreps_peak_23495	1.69878	224	ENSMUST00000127950	Eif4enif1	1.87956	0.0200085	0.0889485	up	Ensembl	813	chr11:3234219-3240975+	exon sense-overlapping	ENSMUST00000020734	Eif4enif1	chr11:3202392-3244581+
chrX	62776561	62776742	diffreps_peak_191471	5.76319	181	ENSMUST00000180338	Gm14680	7.59189	1.72509e-06	1.486e-05	up	Ensembl	1592	chrX:62775151-62776742-	intergenic
chr16	13836955	13837140	diffreps_peak_67403	5.98294	185	ENSMUST00000144913	Pdxdc1	7.56501	1.04007e-06	9.31052e-06	up	Ensembl	669	chr16:13836956-13840332-	exon sense-overlapping	NM_001039533	Pdxdc1	chr16:13833573-13903145-
chr11	53678834	53678860	diffreps_peak_26951	0.0962548	26	ENSMUST00000126121	Rad50	1.22353	0.801208	1	up	Ensembl	404	chr11:53678835-53680212-	exon sense-overlapping	ENSMUST00000020649	Rad50	chr11:53649519-53707319-
chr17	45568857	45569387	diffreps_peak_77634	1.82058	530	ENSMUST00000145205	Hsp90ab1	1.09334	0.0151154	0.0694597	up	Ensembl	797	chr17:45568858-45569736-	exon sense-overlapping	ENSMUST00000166469	Hsp90ab1	chr17:45569578-45573255-
chr9	103363881	103364260	diffreps_peak_186231	1.14351	379	uc009rgs.1	AK048941	1.09685	0.0718607	0.261738	up	UCSC_knowngene	2664	chr9:103361604-103364267-	exon sense-overlapping	NM_175565	Cdv3	chr9:103353102-103365780-
chr7	45380716	45381040	diffreps_peak_159379	0.578019	324	NR_126539	Snrnp70	1.09673	0.264229	0.699003	up	RefSeq	4117	chr7:45376454-45395742-	exon sense-overlapping	ENSMUST00000074575	Snrnp70	chr7:45376462-45395692-
chr2	26378342	26378636	diffreps_peak_94288	6.94249	294	ENSMUST00000155643	Snapc4	7.49579	1.14159e-07	1.32452e-06	up	Ensembl	372	chr2:26378343-26380626-	exon sense-overlapping	ENSMUST00000035427	Snapc4	chr2:26362774-26380653-
chr18	82692948	82693080	diffreps_peak_86690	0.0586325	132	ENSMUST00000181931	Gm10524	1.0167	0.87371	1	up	Ensembl	1984	chr18:82692949-82706174+	bidirectional	uc008fub.2	Zfp236	chr18:82593597-82692734-
chr17	79011501	79011720	diffreps_peak_80446	6.08206	219	ENSMUST00000130070	Prkd3	7.45918	8.27831e-07	7.5544e-06	up	Ensembl	3508	chr17:79010127-79020777-	exon sense-overlapping	ENSMUST00000168887	Prkd3	chr17:78949405-79020816-
chr3	90270054	90270128	diffreps_peak_112273	0.535704	74	ENSMUST00000151648	Dennd4b	1.53164	0.29127	0.741605	up	Ensembl	1073	chr3:90269016-90271697+	exon sense-overlapping	NM_201407	Dennd4b	chr3:90266514-90280665+
chr1	97834407	97834520	diffreps_peak_6706	0.538793	113	ENSMUST00000159585	Pam	1.14442	0.289205	0.738178	up	Ensembl	560	chr1:97821981-97834647-	exon sense-overlapping	ENSMUST00000058762	Pam	chr1:97821094-98095621-
chr10	128547441	128547639	diffreps_peak_23229	5.24188	198	ENSMUST00000152539	Zc3h10	7.45369	5.72958e-06	4.56815e-05	up	Ensembl	992	chr10:128545080-128547639-	exon sense-overlapping	NM_134003	Zc3h10	chr10:128543565-128547744-
chr5	114718541	114718719	diffreps_peak_138308	0.458158	178	ENSMUST00000128625	Tchp	1.72509	0.34821	0.833351	up	Ensembl	391	chr5:114717560-114718719+	exon sense-overlapping	NM_029992	Tchp	chr5:114707779-114722327+
chr12	110660933	110661265	diffreps_peak_42646	2.06265	332	ENSMUST00000170024	Dync1h1	1.37177	0.00865672	0.0424041	up	Ensembl	479	chr12:110660934-110661501+	exon sense-overlapping	ENSMUST00000018851	Dync1h1	chr12:110601452-110666945+
chr2	35661349	35661625	diffreps_peak_95717	0.154106	276	ENSMUST00000156465	Dab2ip	1.11113	0.701285	1	up	Ensembl	464	chr2:35661350-35708847+	exon sense-overlapping	ENSMUST00000112986	Dab2ip	chr2:35558266-35730994+
chrX	88572541	88572780	diffreps_peak_193188	1.0042	239	ENSMUST00000118653	Gm8864	4.63889	0.0990381	0.338988	up	Ensembl	1010	chrX:88572051-88573060-	intergenic
chr19	46335421	46335506	diffreps_peak_90837	0.0386549	85	ENSMUST00000180538	Gm26792	1.08929	0.91484	1	up	Ensembl	2799	chr19:46335287-46338538+	intronic antisense	NM_001164291	Cuedc2	chr19:46329812-46338660-
chr7	28785741	28785882	diffreps_peak_157362	3.87937	141	ENSMUST00000127953	Sirt2	1.89257	0.000132017	0.000890158	up	Ensembl	372	chr7:28785383-28787626+	exon sense-overlapping	NM_001122765	Sirt2	chr7:28766752-28788665+
chr3	96579941	96580140	diffreps_peak_112783	0.0498915	199	ENSMUST00000141579	Polr3gl	1.02901	0.891474	1	up	Ensembl	545	chr3:96578402-96580155-	exon sense-overlapping	ENSMUST00000145001	Polr3gl	chr3:96578502-96594159-
chr1	37299892	37300180	diffreps_peak_2468	0.339668	288	uc007arj.1	AK051424	1.23323	0.457438	0.97976	up	UCSC_knowngene	2910	chr1:37299893-37302802+	exon sense-overlapping	ENSMUST00000132401	Inpp4a	chr1:37299915-37408289+
chr7	17027427	17027600	diffreps_peak_155571	0.492171	173	ENSMUST00000153242	Ppp5c	2.35951	0.32198	0.792675	up	Ensembl	513	chr7:17015463-17027615-	exon sense-overlapping	NM_011155	Ppp5c	chr7:17004641-17027914-
chr13	9172981	9173200	diffreps_peak_43909	0.134395	219	uc029ryv.1	mKIAA0217	1.18649	0.733846	1	up	UCSC_knowngene	2849	chr13:9171556-9174404+	exon sense-overlapping	ENSMUST00000091829	Larp4b	chr13:9093905-9173086+
chr1	86133636	86133784	diffreps_peak_5776	1.97648	148	ENSMUST00000135197	Gm21972	1.92838	0.0105566	0.0506573	up	Ensembl	776	chr1:86133637-86162788+	exon sense-overlapping	ENSMUST00000027434	Armc9	chr1:86154810-86278284+
chr7	126947101	126947113	diffreps_peak_166193	0.691984	12	ENSMUST00000123117	Gm21984	2.02081	0.203243	0.581674	up	Ensembl	822	chr7:126942144-126952873+	intronic antisense	ENSMUST00000106340	Asphd1	chr7:126945567-126949159-
chr5	144768091	144768245	diffreps_peak_143047	0.692156	154	ENSMUST00000136379	Trrap	1.19277	0.203163	0.581553	up	Ensembl	2621	chr5:144768092-144787907+	exon sense-overlapping	ENSMUST00000132925	Trrap	chr5:144785525-144859776+
chr4	103564141	103564400	diffreps_peak_123374	5.84652	259	ENSMUST00000079345	Gm12715	7.4129	1.42391e-06	1.24376e-05	up	Ensembl	1893	chr4:103563336-103565228+	intergenic
chr12	109543441	109543805	diffreps_peak_42439	0.275198	364	uc029rxy.2	Meg3	1.26559	0.530642	1	up	UCSC_knowngene	12939	chr12:109542023-109568650+	intergenic
chr4	133189061	133189195	diffreps_peak_126328	0.141058	134	ENSMUST00000136637	Wasf2	1.07244	0.722673	1	up	Ensembl	599	chr4:133189018-133190549+	exon sense-overlapping	NM_153423	Wasf2	chr4:133130633-133198330+
chr8	121782160	121782320	diffreps_peak_177683	1.72658	160	ENSMUST00000172209	Jph3	1.42535	0.0187682	0.0840475	up	Ensembl	679	chr8:121753476-121782570+	intron sense-overlapping	ENSMUST00000127664	Gm20388	chr8:119910841-124345722+
chr7	44336015	44336200	diffreps_peak_158703	0.0159867	185	ENSMUST00000134470	Shank1	1.08012	0.963858	1	up	Ensembl	608	chr7:44336016-44343738+	exon sense-overlapping	NM_001034115	Shank1	chr7:44310264-44358353+
chr11	72764681	72764867	diffreps_peak_29160	0.079803	186	ENSMUST00000132889	Ankfy1	1.05758	0.832141	1	up	Ensembl	642	chr11:72764467-72767753+	exon sense-overlapping	ENSMUST00000155998	Ankfy1	chr11:72690006-72772146+
chrX	169984938	169985200	diffreps_peak_197209	0.617883	262	ENSMUST00000144738	Gm15726	1.48186	0.241056	0.657468	up	Ensembl	509	chrX:169979047-169985232-	natural antisense	ENSMUST00000112104	Mid1	chrX:169685199-169990798+
chr13	55506761	55506980	diffreps_peak_47022	0.0537006	219	ENSMUST00000153230	Pdlim7	1.05138	0.883689	1	up	Ensembl	3573	chr13:55497490-55513434-	exon sense-overlapping	ENSMUST00000153426	Pdlim7	chr13:55508966-55512709-
chr12	109743701	109743851	diffreps_peak_42559	5.29723	150	ENSMUST00000182185	Mirg	7.36209	5.04394e-06	4.05262e-05	up	Ensembl	3822	chr12:109730276-109749458+	intergenic
chr1	150428261	150428353	diffreps_peak_10102	0.532254	92	ENSMUST00000132522	Tpr	1.33695	0.293593	0.745327	up	Ensembl	576	chr1:150424739-150428353+	exon sense-overlapping	ENSMUST00000119161	Tpr	chr1:150393250-150449935+
chr11	120795761	120795980	diffreps_peak_35626	8.47312	219	ENSMUST00000146008	Dus1l	7.3384	3.36421e-09	1.60662e-07	up	Ensembl	3062	chr11:120789206-120796389-	exon sense-overlapping	NM_026824	Dus1l	chr11:120789202-120796395-
chr2	25460581	25460920	diffreps_peak_94087	0.357469	339	ENSMUST00000124172	BC029214	1.79923	0.439067	0.957759	up	Ensembl	1245	chr2:25459561-25460965-	exon sense-overlapping	ENSMUST00000114261	BC029214	chr2:25459482-25461094-
chr2	32375741	32376122	diffreps_peak_95368	1.64759	381	ENSMUST00000134141	Ciz1	1.64445	0.022512	0.0986368	up	Ensembl	3469	chr2:32374209-32378299+	exon sense-overlapping	ENSMUST00000125482	Ciz1	chr2:32370909-32375538+
chr1	34807023	34807200	diffreps_peak_2300	0.124377	177	uc007apg.1	Arhgef4	1.11653	0.75097	1	up	UCSC_knowngene	2358	chr1:34801722-34808911+	exon sense-overlapping	ENSMUST00000159021	Arhgef4	chr1:34750881-34807144+
chr5	115445394	115445520	diffreps_peak_138464	1.49101	126	ENSMUST00000130849	Msi1	1.5303	0.0322841	0.134127	up	Ensembl	599	chr5:115435498-115445694+	exon sense-overlapping	ENSMUST00000150779	Msi1	chr5:115429599-115455698+
chr14	101920401	101920554	diffreps_peak_56854	0.0787965	153	ENSMUST00000159154	Lmo7	1.06126	0.834072	1	up	Ensembl	3330	chr14:101919077-101930760+	exon sense-overlapping	ENSMUST00000159314	Lmo7	chr14:101840648-101934687+
chr2	4433441	4433512	diffreps_peak_92224	0.208888	71	ENSMUST00000141746	Frmd4a	1.2406	0.618176	1	up	Ensembl	2412	chr2:4389616-4433512+	exon sense-overlapping	ENSMUST00000175669	Frmd4a	chr2:4300518-4572439+
chr5	108371001	108371380	diffreps_peak_137382	0.330667	379	uc008ynw.2	AK031816	1.13459	0.467017	0.99099	up	UCSC_knowngene	2530	chr5:108367791-108372807+	exon sense-overlapping	ENSMUST00000100944	Gm10419	chr5:108369858-108378239+
chr11	101246932	101247040	diffreps_peak_32673	6.85502	108	ENSMUST00000138229	Ramp2	7.32907	1.3963e-07	1.56002e-06	up	Ensembl	755	chr11:101246933-101248250+	exon sense-overlapping	NM_019444	Ramp2	chr11:101246334-101248250+
chr12	108178773	108179380	diffreps_peak_42207	0.812629	607	uc033gff.1	Ccnk	2.01807	0.153947	0.472886	up	UCSC_knowngene	1205	chr12:108178774-108186622+	exon sense-overlapping	NM_009832	Ccnk	chr12:108179738-108203359+
chr5	121208195	121208575	diffreps_peak_139444	1.28718	380	ENSMUST00000138621	Rpl6	1.24727	0.0516205	0.200057	up	Ensembl	565	chr5:121208196-121208966+	exon sense-overlapping	ENSMUST00000031617	Rpl6	chr5:121204481-121209241+
chr5	24703501	24703760	diffreps_peak_131511	0.0788833	259	ENSMUST00000181925	Gm26648	1.09314	0.833905	1	up	Ensembl	5831	chr5:24696902-24704690-	natural antisense	NM_001305264	Nub1	chr5:24685815-24710378+
chr10	81315101	81315300	diffreps_peak_19613	0.0285273	199	ENSMUST00000159895	Pip5k1c	1.00394	0.936424	1	up	Ensembl	897	chr10:81313988-81315782+	exon sense-overlapping	ENSMUST00000163075	Pip5k1c	chr10:81292963-81319972+
chr15	12576041	12576093	diffreps_peak_58748	0.00619214	52	uc007vhv.1	AK201904	1.07473	0.985843	1	up	UCSC_knowngene	399	chr15:12575695-12576093+	intronic antisense	NM_001081064	Pdzd2	chr15:12357054-12592556-
chr17	46545901	46546260	diffreps_peak_77897	1.83576	359	ENSMUST00000182315	Cul9	1.80751	0.0145962	0.0673668	up	Ensembl	8451	chr17:46500616-46546301-	exon sense-overlapping	NM_001081335	Cul9	chr17:46500609-46546388-
chr8	121991457	121991680	diffreps_peak_177721	6.71145	223	ENSMUST00000174327	Banp	7.31582	1.94335e-07	2.05653e-06	up	Ensembl	445	chr8:121991458-121997238+	exon sense-overlapping	ENSMUST00000026354	Banp	chr8:121950580-122025937+
chr4	118367441	118367622	diffreps_peak_124424	0.461909	181	uc008ujt.3	Szt2	1.60798	0.345216	0.828614	up	UCSC_knowngene	3724	chr4:118362740-118374339-	exon sense-overlapping	NM_198170	Szt2	chr4:118362740-118409263-
chr11	116165782	116165912	diffreps_peak_34433	10.759	130	ENSMUST00000136073	Fbf1	7.31324	1.74177e-11	6.43599e-09	up	Ensembl	763	chr11:116165783-116167765-	exon sense-overlapping	NM_172571	Fbf1	chr11:116142285-116168178-
chr2	173586061	173586440	diffreps_peak_105771	0.0238774	379	uc008odz.2	Ppp4r1l-ps	1.00199	0.946504	1	up	UCSC_knowngene	3603	chr2:173585854-173659539-	bidirectional	uc008oed.1	Rab22a	chr2:173659845-173702182+
chr1	132880741	132880842	diffreps_peak_8869	0.228941	101	ENSMUST00000159088	Lrrn2	1.90481	0.590281	1	up	Ensembl	658	chr1:132880355-132937150+	exon sense-overlapping	ENSMUST00000027706	Lrrn2	chr1:132880273-132940005+
chr11	3146161	3146400	diffreps_peak_23436	0.453987	239	ENSMUST00000146888	Sfi1	1.3103	0.351571	0.838249	up	Ensembl	733	chr11:3144881-3146722-	exon sense-overlapping	NM_030207	Sfi1	chr11:3131850-3193463-
chr6	108140141	108140460	diffreps_peak_150472	7.34098	319	ENSMUST00000025040	Gm4604	7.23232	4.56063e-08	6.58658e-07	up	Ensembl	390	chr6:108140120-108140509-	intron sense-overlapping	ENSMUST00000032191	Sumf1	chr6:108107028-108185582-
chr11	108012626	108012805	diffreps_peak_33696	1.49266	179	ENSMUST00000134910	Prkca	1.3413	0.0321621	0.1337	up	Ensembl	678	chr11:107978341-108012805-	exon sense-overlapping	ENSMUST00000059595	Prkca	chr11:107933387-108343928-
chr2	153070861	153071120	diffreps_peak_103420	0.205477	259	ENSMUST00000127549	Ccm2l	1.39406	0.62305	1	up	Ensembl	627	chr2:153065984-153071143+	exon sense-overlapping	ENSMUST00000109800	Ccm2l	chr2:153066002-153081735+
chr11	120485061	120485320	diffreps_peak_35507	0.31935	259	ENSMUST00000137619	Mrpl12	1.54391	0.479347	1	up	Ensembl	768	chr11:120485027-120488457+	exon sense-overlapping	ENSMUST00000043627	Mrpl12	chr11:120484613-120489065+
chr3	89269049	89269298	diffreps_peak_112074	5.50521	249	ENSMUST00000133575	Slc50a1	7.2	3.12458e-06	2.58553e-05	up	Ensembl	1176	chr3:89268246-89270526-	exon sense-overlapping	NM_009057	Slc50a1	chr3:89268246-89270570-
chr7	30081071	30081217	diffreps_peak_157616	4.86861	146	ENSMUST00000182248	Zfp566	7.19849	1.3533e-05	0.000102824	up	Ensembl	382	chr7:30081072-30090463-	exon sense-overlapping	NM_152814	Zfp566	chr7:30077337-30090510-
chr17	33760181	33760460	diffreps_peak_76455	0.33734	279	uc008bzo.1	AK133808	1.48219	0.459897	0.982508	up	UCSC_knowngene	925	chr17:33759992-33761870+	natural antisense	ENSMUST00000057373	Rab11b	chr17:33742484-33760530-
chr2	25353152	25353520	diffreps_peak_94024	10.3452	368	ENSMUST00000139971	Dpp7	7.19414	4.51688e-11	1.45601e-08	up	Ensembl	3017	chr2:25352287-25356331-	exon sense-overlapping	ENSMUST00000028332	Dpp7	chr2:25352290-25356359-
chr7	4996003	4996158	diffreps_peak_154394	6.164	155	ENSMUST00000160225	Zfp579	7.18613	6.85486e-07	6.36858e-06	up	Ensembl	856	chr7:4992852-4996158-	exon sense-overlapping	NM_026741	Zfp579	chr7:4992852-4996101-
chr11	94656407	94656618	diffreps_peak_31416	9.06729	211	ENSMUST00000129498	Mrpl27	7.15901	8.56457e-10	1.46932e-07	up	Ensembl	442	chr11:94654011-94659621+	exon sense-overlapping	NM_053161	Mrpl27	chr11:94653791-94660087+
chr5	134295521	134295687	diffreps_peak_141298	0.724211	166	ENSMUST00000174773	Gtf2i	2.27879	0.188708	0.550811	up	Ensembl	513	chr5:134289226-134295687-	exon sense-overlapping	ENSMUST00000111261	Gtf2i	chr5:134237837-134314746-
chr8	123246515	123246619	diffreps_peak_177986	5.44204	104	ENSMUST00000127978	Vps9d1	7.13718	3.61374e-06	2.96328e-05	up	Ensembl	705	chr8:123246516-123247996-	exon sense-overlapping	NM_028200	Vps9d1	chr8:123242356-123254175-
chr16	95709771	95709900	diffreps_peak_73003	0.688932	129	ENSMUST00000145509	Ets2	2.80633	0.204677	0.584711	up	Ensembl	654	chr16:95702455-95710163+	exon sense-overlapping	ENSMUST00000023612	Ets2	chr16:95702075-95721051+
chr11	90389595	90389690	diffreps_peak_31092	4.92836	95	ENSMUST00000043658	Hlf	7.10602	1.17934e-05	9.03212e-05	up	Ensembl	2712	chr11:90338990-90389690-	exon sense-overlapping	NM_172563	Hlf	chr11:90336535-90390917-
chr2	141127381	141127600	diffreps_peak_102587	0.0198745	219	ENSMUST00000117884	Gm14080	1.00437	0.955269	1	up	Ensembl	786	chr2:141127280-141128065+	intron sense-overlapping	ENSMUST00000110067	Macrod2	chr2:140395309-142392966+
chr18	6069761	6070060	diffreps_peak_81680	1.05328	299	ENSMUST00000182572	Arhgap12	2.0426	0.0884542	0.310337	up	Ensembl	2444	chr18:6068654-6071097-	exon sense-overlapping	ENSMUST00000182559	Arhgap12	chr18:6025217-6136098-
chr16	4770670	4770820	diffreps_peak_66423	0.449906	150	ENSMUST00000140187	Cdip1	1.71425	0.35489	0.843332	up	Ensembl	3811	chr16:4766841-4771512-	exon sense-overlapping	ENSMUST00000118703	Cdip1	chr16:4766841-4790292-
chr6	108565461	108565693	diffreps_peak_150511	5.04325	232	ENSMUST00000062429	Gm16433	7.09272	9.05202e-06	7.03464e-05	up	Ensembl	2248	chr6:108563445-108565693-	intergenic
chr5	24594694	24594780	diffreps_peak_131478	0.849555	86	ENSMUST00000147857	Smarcd3	1.59293	0.141398	0.443062	up	Ensembl	786	chr5:24594695-24596849-	exon sense-overlapping	ENSMUST00000030791	Smarcd3	chr5:24592622-24602012-
chr10	75046031	75046260	diffreps_peak_18098	0.00547942	229	ENSMUST00000142507	Rab36	1.03975	0.987462	1	up	Ensembl	2994	chr10:75037226-75047572+	exon sense-overlapping	ENSMUST00000146440	Rab36	chr10:75037836-75054061+
chr16	4876281	4876680	diffreps_peak_66431	2.54136	399	ENSMUST00000143873	Ubald1	1.43188	0.00287499	0.0156656	up	Ensembl	4749	chr16:4874788-4879805-	exon sense-overlapping	ENSMUST00000037843	Ubald1	chr16:4874778-4880315-
chr11	68811426	68811600	diffreps_peak_28298	0.0406651	174	ENSMUST00000124006	Myh10	1.00088	0.910615	1	up	Ensembl	558	chr11:68811427-68813019+	exon sense-overlapping	ENSMUST00000102611	Myh10	chr11:68691915-68816632+
chr16	34513961	34514115	diffreps_peak_69166	0.492616	154	ENSMUST00000132569	Kalrn	1.38629	0.321651	0.792135	up	Ensembl	523	chr16:34512749-34514115-	exon sense-overlapping	ENSMUST00000089655	Kalrn	chr16:34152035-34514086-
chr7	25291781	25292040	diffreps_peak_156719	0.0772943	259	ENSMUST00000170500	Cic	1.10026	0.836962	1	up	Ensembl	764	chr7:25291208-25292078+	exon sense-overlapping	ENSMUST00000169266	Cic	chr7:25267704-25294159+
chr11	101465621	101465933	diffreps_peak_32710	0.262762	312	ENSMUST00000134980	Rnd2	1.43184	0.546057	1	up	Ensembl	831	chr11:101465484-101471105+	exon sense-overlapping	ENSMUST00000001347	Rnd2	chr11:101468175-101471853+
chr4	145729781	145729980	diffreps_peak_128087	0.00808038	199	ENSMUST00000121816	Gm13232	1.06772	0.981566	1	up	Ensembl	632	chr4:145729581-145730212-	intergenic
chr17	56570941	56571160	diffreps_peak_78947	0.775854	219	ENSMUST00000134741	Safb2	1.31616	0.167551	0.504274	up	Ensembl	2107	chr17:56570081-56575519-	exon sense-overlapping	ENSMUST00000075510	Safb2	chr17:56562939-56584585-
chr2	27454081	27454280	diffreps_peak_94447	0.323103	199	ENSMUST00000130932	Brd3	1.15687	0.475222	1	up	Ensembl	2893	chr2:27452996-27475653-	exon sense-overlapping	ENSMUST00000138693	Brd3	chr2:27449269-27475654-
chr7	4119910	4120360	diffreps_peak_154110	0.349446	450	NR_033568	9430041J12Rik	1.40273	0.447253	0.967966	up	RefSeq	2312	chr7:4074125-4120728-	natural antisense	NM_001109765	Ttyh1	chr7:4119533-4136241+
chr10	80342701	80343020	diffreps_peak_19082	1.23913	319	NR_104339	Adamtsl5	2.97507	0.0576595	0.218633	up	RefSeq	3559	chr10:80339793-80348448-	exon sense-overlapping	ENSMUST00000138705	Adamtsl5	chr10:80343006-80345238-
chr17	34035653	34035840	diffreps_peak_76558	0.313473	187	ENSMUST00000174740	Rxrb	1.22841	0.485878	1	up	Ensembl	697	chr17:34033552-34036010+	exon sense-overlapping	ENSMUST00000173554	Rxrb	chr17:34032196-34034202+
chr7	44490901	44491100	diffreps_peak_158917	0.105334	199	ENSMUST00000147102	Emc10	1.08981	0.784633	1	up	Ensembl	429	chr7:44490885-44492018-	exon sense-overlapping	ENSMUST00000118515	Emc10	chr7:44490111-44496406-
chr6	39404681	39405060	diffreps_peak_145883	1.36998	379	ENSMUST00000122874	Mkrn1	1.63471	0.0426603	0.170086	up	Ensembl	584	chr6:39401275-39405081-	exon sense-overlapping	ENSMUST00000150575	Mkrn1	chr6:39399143-39404730-
chr9	61407141	61407473	diffreps_peak_183573	0.738736	332	ENSMUST00000159140	Tle3	1.21123	0.1825	0.53745	up	Ensembl	8638	chr9:61402461-61417835+	exon sense-overlapping	ENSMUST00000160882	Tle3	chr9:61373385-61417837+
chr6	88910261	88910401	diffreps_peak_149283	5.48751	140	ENSMUST00000123257	Tpra1	7.06787	3.25456e-06	2.68601e-05	up	Ensembl	788	chr6:88907989-88910842+	exon sense-overlapping	ENSMUST00000128171	Tpra1	chr6:88908188-88909527+
chr16	84834661	84834900	diffreps_peak_72175	1.78053	239	ENSMUST00000148787	Atp5j	1.17992	0.0165758	0.0753942	up	Ensembl	817	chr16:84834276-84835529-	exon sense-overlapping	ENSMUST00000023608	Atp5j	chr16:84827871-84835625-
chr10	128249212	128249260	diffreps_peak_23099	0.025333	48	ENSMUST00000136854	Timeless	1.0643	0.943337	1	up	Ensembl	560	chr10:128249213-128249860+	exon sense-overlapping	ENSMUST00000105245	Timeless	chr10:128238066-128252941+
chr2	26902587	26902790	diffreps_peak_94342	5.66525	203	ENSMUST00000142131	Surf6	1.65845	2.16147e-06	1.83297e-05	up	Ensembl	748	chr2:26892675-26902790-	exon sense-overlapping	ENSMUST00000114043	Surf6	chr2:26890772-26902850-
chr8	84867548	84867700	diffreps_peak_175046	6.78	152	ENSMUST00000129595	Farsa	7.05169	1.6596e-07	1.80068e-06	up	Ensembl	1920	chr8:84856995-84869256+	exon sense-overlapping	ENSMUST00000109754	Farsa	chr8:84857017-84869257+
chr19	22438519	22438640	diffreps_peak_89324	0.886501	121	ENSMUST00000183473	RP23-448C3.1	2.08851	0.129867	0.414646	up	Ensembl	383	chr19:22438520-22448142-	intronic antisense	ENSMUST00000099569	Trpm3	chr19:22139119-22989882+
chr9	113655961	113656207	diffreps_peak_187521	2.12734	246	ENSMUST00000142256	Pdcd6ip	1.94391	0.00745868	0.0371047	up	Ensembl	847	chr9:113655570-113657294-	exon sense-overlapping	NM_011052	Pdcd6ip	chr9:113651744-113708259-
chr11	102200399	102200540	diffreps_peak_32809	0.646723	141	ENSMUST00000133651	Hdac5	1.43292	0.225568	0.627746	up	Ensembl	672	chr11:102199390-102200816-	exon sense-overlapping	NM_001284249	Hdac5	chr11:102195747-102230172-
chr2	30359142	30359337	diffreps_peak_94897	0.172981	195	ENSMUST00000128387	Sh3glb2	1.18616	0.671459	1	up	Ensembl	820	chr2:30345820-30359337-	exon sense-overlapping	ENSMUST00000163668	Sh3glb2	chr2:30344811-30359289-
chr2	130277801	130278000	diffreps_peak_101808	0.224733	199	ENSMUST00000150745	Nop56	1.11217	0.596028	1	up	Ensembl	3627	chr2:130274444-130279312+	natural antisense	ENSMUST00000028892	Idh3b	chr2:130279309-130284547-
chr10	81313987	81314093	diffreps_peak_19608	1.98445	106	ENSMUST00000159895	Pip5k1c	1.76287	0.0103646	0.0498285	up	Ensembl	897	chr10:81313988-81315782+	exon sense-overlapping	NM_001293647	Pip5k1c	chr10:81292963-81319974+
chr7	4467244	4467340	diffreps_peak_154180	0.0408764	96	NR_028416	D630041G03Rik	1.00761	0.910172	1	up	RefSeq	3640	chr7:4467245-4470884-	natural antisense	ENSMUST00000086372	Eps8l1	chr7:4464742-4479242+
chr4	101102881	101103160	diffreps_peak_123163	0.441473	279	ENSMUST00000148148	Raver2	1.19967	0.361848	0.853548	up	Ensembl	1444	chr4:101069479-101103806+	exon sense-overlapping	ENSMUST00000038463	Raver2	chr4:101068983-101152370+
chr17	13760041	13760260	diffreps_peak_74163	0.0776685	219	ENSMUST00000155166	Gm16049	1.15143	0.836241	1	up	Ensembl	616	chr17:13759406-13760368-	intron sense-overlapping	ENSMUST00000127032	Tcte2	chr17:13716436-13761601-
chr2	180583141	180583440	diffreps_peak_106600	0.73236	299	ENSMUST00000130277	Mrgbp	2.03344	0.1852	0.54358	up	Ensembl	3150	chr2:180582726-180586304+	exon sense-overlapping	ENSMUST00000169630	Mrgbp	chr2:180581304-180585634+
chr1	180960341	180960506	diffreps_peak_12275	0.738445	165	ENSMUST00000161942	Tmem63a	2.26646	0.182623	0.53771	up	Ensembl	547	chr1:180960067-180960841+	exon sense-overlapping	ENSMUST00000161523	Tmem63a	chr1:180944035-180975103+
chr9	118050021	118050220	diffreps_peak_187778	4.87353	199	ENSMUST00000143024	Azi2	7.03175	1.33803e-05	0.000101724	up	Ensembl	943	chr9:118040687-118050220+	exon sense-overlapping	NM_001048146	Azi2	chr9:118040522-118060484+
chrX	142631861	142632080	diffreps_peak_195760	2.78606	219	ENSMUST00000061991	Gm5763	7.02273	0.00163661	0.00933228	up	Ensembl	1599	chrX:142631483-142633135-	intergenic
chr8	85554981	85555368	diffreps_peak_175175	0.664787	387	uc009mqb.1	AK163592	1.2135	0.216378	0.609062	up	UCSC_knowngene	1168	chr8:85554201-85555368-	exon sense-overlapping	NM_019794	Dnaja2	chr8:85537640-85555271-
chr2	166995801	166996239	diffreps_peak_105238	0.955887	438	uc008nyz.1	AK041781	1.37359	0.110691	0.369335	up	UCSC_knowngene	3594	chr2:166992646-166996239-	exon sense-overlapping	ENSMUST00000049412	Stau1	chr2:166948147-166996103-
chr15	100584018	100584238	diffreps_peak_65739	0.441538	220	ENSMUST00000176492	Pou6f1	1.34614	0.361794	0.853502	up	Ensembl	2071	chr15:100577273-100584238-	exon sense-overlapping	NM_001304965	Pou6f1	chr15:100575318-100599984-
chr2	24925881	24926200	diffreps_peak_93889	4.80226	319	NR_027876	Arrdc1	7.01743	1.57666e-05	0.000118772	up	RefSeq	1731	chr2:24925355-24935281-	exon sense-overlapping	ENSMUST00000102935	Arrdc1	chr2:24925352-24935163-
chr10	81317141	81317360	diffreps_peak_19626	0.136125	219	ENSMUST00000159636	Pip5k1c	1.17382	0.730929	1	up	Ensembl	810	chr10:81316842-81318013+	exon sense-overlapping	NM_001293647	Pip5k1c	chr10:81292963-81319974+
chr12	76803481	76803628	diffreps_peak_40055	0.740491	147	ENSMUST00000134124	Rab15	1.40789	0.181765	0.535892	up	Ensembl	1079	chr12:76802880-76822462-	exon sense-overlapping	ENSMUST00000154765	Rab15	chr12:76800330-76822908-
chr17	33829421	33829620	diffreps_peak_76462	0.462564	199	ENSMUST00000173946	Ndufa7	1.59524	0.344696	0.827803	up	Ensembl	640	chr17:33829393-33838314+	exon sense-overlapping	ENSMUST00000048249	Ndufa7	chr17:33824591-33838316+
chr1	21961961	21962420	diffreps_peak_1416	7.25585	459	ENSMUST00000181002	Gm26580	7.01734	5.54821e-08	7.60022e-07	up	Ensembl	2095	chr1:21959842-21962530+	natural antisense	ENSMUST00000173058	Kcnq5	chr1:21402163-21961581-
chr17	7946321	7946426	diffreps_peak_73723	0.00671562	105	uc008aiq.1	AK051008	1.01554	0.984656	1	up	UCSC_knowngene	2050	chr17:7881106-7946426-	natural antisense	ENSMUST00000097423	Rsph3a	chr17:7945653-7979824+
chr16	4768744	4769180	diffreps_peak_66421	1.75349	436	ENSMUST00000140187	Cdip1	1.60852	0.0176404	0.0796272	up	Ensembl	3811	chr16:4766841-4771512-	exon sense-overlapping	ENSMUST00000004173	Cdip1	chr16:4765461-4789990-
chr12	18216561	18216900	diffreps_peak_36903	7.00319	339	ENSMUST00000101577	Gm10480	6.94777	9.92675e-08	1.18241e-06	up	Ensembl	1203	chr12:18216555-18217757+	intergenic
chr1	162713061	162713440	diffreps_peak_10978	0.00364222	379	ENSMUST00000182448	Prrc2c	1.00796	0.991649	1	up	Ensembl	1215	chr1:162712802-162714016-	exon sense-overlapping	ENSMUST00000182593	Prrc2c	chr1:162672889-162740481-
chr4	155755841	155756160	diffreps_peak_129613	7.57246	319	ENSMUST00000134317	Atad3a	6.91358	2.67636e-08	4.54944e-07	up	Ensembl	697	chr4:155755829-155761087-	exon sense-overlapping	NM_179203	Atad3a	chr4:155740640-155761098-
chr15	85896821	85896917	diffreps_peak_64258	4.65485	96	ENSMUST00000159362	Trmu	6.85493	2.21387e-05	0.000163836	up	Ensembl	869	chr15:85894751-85897059+	exon sense-overlapping	ENSMUST00000023019	Trmu	chr15:85879320-85897392+
chr7	3658781	3658824	diffreps_peak_154043	0.605718	43	ENSMUST00000144097	Cnot3	1.2856	0.247903	0.670246	up	Ensembl	1800	chr7:3658745-3661100+	exon sense-overlapping	ENSMUST00000160200	Cnot3	chr7:3659390-3661100+
chr10	81249741	81249980	diffreps_peak_19543	0.498313	239	ENSMUST00000148029	Zfr2	1.18726	0.317458	0.785078	up	Ensembl	986	chr10:81249051-81250546+	exon sense-overlapping	NM_001034895	Zfr2	chr10:81233163-81252123+
chr14	66158530	66158700	diffreps_peak_54892	0.301563	170	ENSMUST00000136216	Ptk2b	1.16213	0.499387	1	up	Ensembl	3478	chr14:66153267-66160678-	exon sense-overlapping	ENSMUST00000178730	Ptk2b	chr14:66153258-66213552-
chrX	21361561	21361820	diffreps_peak_189550	0.140578	259	ENSMUST00000181848	Gm26593	1.07337	0.723473	1	up	Ensembl	1970	chrX:21360865-21364622-	intergenic
chr1	143683681	143684060	diffreps_peak_9782	0.152278	379	ENSMUST00000161973	Gm6397	1.18595	0.704242	1	up	Ensembl	1069	chr1:143683230-143684298+	intronic antisense	NM_145991	Cdc73	chr1:143607499-143702684-
chr11	116155383	116155508	diffreps_peak_34431	0.852416	125	ENSMUST00000143038	Fbf1	2.44102	0.14047	0.440785	up	Ensembl	598	chr11:116154750-116158893-	exon sense-overlapping	ENSMUST00000103031	Fbf1	chr11:116142285-116168153-
chr7	127981341	127981580	diffreps_peak_166618	0.0394268	239	ENSMUST00000172755	Fus	1.0533	0.913215	1	up	Ensembl	670	chr7:127980216-127981829+	exon sense-overlapping	NM_139149	Fus	chr7:127967479-127982031+
chr9	70852921	70853418	diffreps_peak_184402	7.35388	497	ENSMUST00000179930	Gm3436	6.82716	4.42715e-08	6.44204e-07	up	Ensembl	843	chr9:70852576-70853418+	intronic antisense	ENSMUST00000034731	Lipc	chr9:70798129-70934808-
chr5	135783304	135783520	diffreps_peak_141660	2.27131	216	ENSMUST00000143747	Mdh2	1.78959	0.00535412	0.027555	up	Ensembl	528	chr5:135778722-135783752+	exon sense-overlapping	ENSMUST00000019323	Mdh2	chr5:135778480-135790391+
chr13	55085609	55085840	diffreps_peak_46912	0.661085	231	ENSMUST00000128641	Uimc1	1.3773	0.21823	0.612917	up	Ensembl	654	chr13:55077457-55086192-	exon sense-overlapping	ENSMUST00000099496	Uimc1	chr13:55028295-55100300-
chr12	91831568	91831700	diffreps_peak_41307	0.112833	132	ENSMUST00000171959	Sel1l	1.04736	0.771201	1	up	Ensembl	820	chr12:91824878-91831932-	exon sense-overlapping	ENSMUST00000021347	Sel1l	chr12:91806043-91849157-
chr11	120624672	120624960	diffreps_peak_35548	0.301767	288	ENSMUST00000127882	Sirt7	1.90351	0.499152	1	up	Ensembl	3274	chr11:120618372-120625240-	exon sense-overlapping	ENSMUST00000106183	Sirt7	chr11:120623990-120624984-
chr8	20404921	20405140	diffreps_peak_169717	11.1522	219	uc009lbf.1	2610005L07Rik	6.79639	7.04443e-12	3.07077e-09	up	UCSC_knowngene	820	chr8:20404806-20410729-	intergenic
chr2	57237713	57238060	diffreps_peak_97078	0.646074	347	uc008jsa.1	AK044432	1.84219	0.225905	0.628407	up	UCSC_knowngene	1455	chr2:57236313-57238508-	natural antisense	ENSMUST00000028167	Gpd2	chr2:57238382-57370719+
chr11	120708901	120709120	diffreps_peak_35560	0.0864955	219	ENSMUST00000172392	Aspscr1	1.04287	0.819416	1	up	Ensembl	491	chr11:120708858-120709445+	exon sense-overlapping	ENSMUST00000106159	Aspscr1	chr11:120676661-120709444+
chr10	105845101	105845300	diffreps_peak_21233	0.535508	199	ENSMUST00000133538	Ccdc59	2.24565	0.291402	0.741832	up	Ensembl	4314	chr10:105841067-105847833+	exon sense-overlapping	ENSMUST00000020049	Ccdc59	chr10:105841067-105847833+
chr9	115437841	115438140	diffreps_peak_187644	5.86765	299	ENSMUST00000075898	Gm5921	6.785	1.35629e-06	1.18897e-05	up	Ensembl	882	chr9:115437700-115438581-	intergenic
chr15	75663261	75663460	diffreps_peak_62288	7.14197	199	ENSMUST00000146755	Gm15945	6.76625	7.21161e-08	9.2562e-07	up	Ensembl	810	chr15:75661407-75663529+	natural antisense	ENSMUST00000000958	Top1mt	chr15:75657035-75678800-
chr4	11234141	11234480	diffreps_peak_116980	1.05259	339	ENSMUST00000147372	Ints8	3.5732	0.088596	0.310687	up	Ensembl	2604	chr4:11232568-11235968-	exon sense-overlapping	ENSMUST00000108318	Ints8	chr4:11204383-11254258-
chr5	34628421	34628640	diffreps_peak_132569	0.121625	219	ENSMUST00000139044	Add1	1.0765	0.755745	1	up	Ensembl	650	chr5:34619971-34628743+	exon sense-overlapping	ENSMUST00000152805	Add1	chr5:34619354-34632308+
chr8	120572721	120572920	diffreps_peak_177569	0.0269681	199	ENSMUST00000147327	Gse1	1.03259	0.939792	1	up	Ensembl	809	chr8:120571281-120573272+	exon sense-overlapping	NM_001145896	Gse1	chr8:120537409-120581383+
chr11	62330795	62330940	diffreps_peak_27811	0.5589	145	ENSMUST00000161281	Ncor1	1.53593	0.276121	0.716391	up	Ensembl	643	chr11:62327131-62330943-	exon sense-overlapping	ENSMUST00000101067	Ncor1	chr11:62317797-62438481-
chr10	127549316	127549503	diffreps_peak_22939	0.695261	187	ENSMUST00000129727	Lrp1	1.29145	0.201715	0.578342	up	Ensembl	679	chr10:127546395-127549917-	exon sense-overlapping	NM_008512	Lrp1	chr10:127538158-127621148-
chr10	127297481	127297675	diffreps_peak_22823	4.46633	194	ENSMUST00000139683	Mars	6.76537	3.41722e-05	0.000247418	up	Ensembl	467	chr10:127296349-127297675-	exon sense-overlapping	ENSMUST00000134778	Mars	chr10:127296226-127297764-
chr6	125162211	125162527	diffreps_peak_152458	7.43777	316	ENSMUST00000147954	Gapdh	1.40111	3.64947e-08	5.62692e-07	up	Ensembl	565	chr6:125161853-125162527-	exon sense-overlapping	ENSMUST00000117757	Gapdh	chr6:125161853-125166467-
chr10	108902141	108902315	diffreps_peak_21538	0.323805	174	ENSMUST00000126278	Syt1	1.05374	0.474455	0.999482	up	Ensembl	3093	chr10:108899432-109009100-	exon sense-overlapping	NM_009306	Syt1	chr10:108497650-109010975-
chr16	3986861	3987181	diffreps_peak_66274	0.539765	320	uc012aap.2	Slx4	1.42215	0.288559	0.737088	up	UCSC_knowngene	4224	chr16:3979106-3989119-	exon sense-overlapping	NM_177472	Slx4	chr16:3979106-4001678-
chr7	81344441	81344531	diffreps_peak_162393	0.0503732	90	ENSMUST00000130487	Rps17	1.03775	0.890485	1	up	Ensembl	405	chr7:81342732-81344531-	exon sense-overlapping	NM_009092	Rps17	chr7:81342733-81345234-
chr4	150248060	150248200	diffreps_peak_128688	1.92133	140	ENSMUST00000151057	Eno1	1.271	0.011986	0.0566637	up	Ensembl	529	chr4:150247460-150248287+	exon sense-overlapping	NM_001025388	Eno1b	chr4:150237324-150248873+
chr1	171417361	171417531	diffreps_peak_11575	0.0319439	170	ENSMUST00000159929	Usf1	1.01363	0.929086	1	up	Ensembl	492	chr1:171417330-171417930+	exon sense-overlapping	ENSMUST00000160486	Usf1	chr1:171411384-171418757+
chrX	151905281	151905431	diffreps_peak_196316	0.678898	150	ENSMUST00000150426	Huwe1	1.24797	0.20946	0.594723	up	Ensembl	901	chrX:151904994-151909917+	exon sense-overlapping	ENSMUST00000026292	Huwe1	chrX:151803327-151935417+
chr4	48345041	48345230	diffreps_peak_120154	0.0481385	189	ENSMUST00000118949	Gm12435	1.03651	0.895079	1	up	Ensembl	1016	chr4:48344215-48345230-	natural antisense	NM_001281978	Invs	chr4:48279760-48431953+
chr10	81121902	81122040	diffreps_peak_19427	0.110245	138	ENSMUST00000128937	Map2k2	1.10932	0.775809	1	up	Ensembl	917	chr10:81120854-81122562+	exon sense-overlapping	ENSMUST00000143517	Map2k2	chr10:81105915-81124697+
chr2	91262912	91263179	diffreps_peak_99117	1.60355	267	ENSMUST00000141313	Pacsin3	1.59403	0.0249145	0.107639	up	Ensembl	514	chr2:91262913-91263533+	exon sense-overlapping	ENSMUST00000168916	Pacsin3	chr2:91256813-91264679+
chr5	115907561	115907834	diffreps_peak_138582	0.251861	273	ENSMUST00000128702	Cit	1.61736	0.559937	1	up	Ensembl	756	chr5:115907470-115925600+	exon sense-overlapping	ENSMUST00000141101	Cit	chr5:115908644-116006353+
chr6	48413401	48413600	diffreps_peak_146634	0.417116	199	ENSMUST00000154536	Krba1	1.19225	0.382722	0.883836	up	Ensembl	5693	chr6:48409199-48419545+	exon sense-overlapping	ENSMUST00000114571	Krba1	chr6:48395586-48419545+
chr11	102399614	102399920	diffreps_peak_32921	0.55523	306	ENSMUST00000146330	Rundc3a	1.08839	0.278465	0.720572	up	Ensembl	1878	chr11:102397864-102402555+	exon sense-overlapping	ENSMUST00000006750	Rundc3a	chr11:102393403-102402555+
chr10	79621053	79621380	diffreps_peak_18696	0.677274	327	ENSMUST00000168116	Shc2	2.03637	0.210245	0.596364	up	Ensembl	3720	chr10:79618051-79622724-	exon sense-overlapping	ENSMUST00000163867	Shc2	chr10:79617940-79637918-
chr5	5782521	5782780	diffreps_peak_130024	0.335002	259	ENSMUST00000181751	Gm26825	1.51204	0.462379	0.985217	up	Ensembl	2026	chr5:5781530-5783636+	intergenic
chr4	152313101	152313284	diffreps_peak_129078	4.47974	183	ENSMUST00000142427	Rnf207	6.72204	3.31326e-05	0.000240239	up	Ensembl	488	chr4:152312834-152313400-	exon sense-overlapping	ENSMUST00000170820	Rnf207	chr4:152311384-152318458-
chr11	98892062	98892840	diffreps_peak_32291	6.99046	778	ENSMUST00000132006	Wipf2	1.45249	1.02222e-07	1.21032e-06	up	Ensembl	1846	chr11:98864117-98892840+	exon sense-overlapping	NM_197940	Wipf2	chr11:98863598-98905578+
chr14	66999520	66999725	diffreps_peak_55034	1.04454	205	ENSMUST00000135703	Bnip3l	1.85994	0.0902523	0.315345	up	Ensembl	354	chr14:66989434-66999725-	exon sense-overlapping	ENSMUST00000111115	Bnip3l	chr14:66985239-67008856-
chr1	176956021	176956360	diffreps_peak_12010	6.6338	339	ENSMUST00000133305	Sdccag8	6.70788	2.3238e-07	2.40118e-06	up	Ensembl	2971	chr1:176814660-176956360+	exon sense-overlapping	NM_029756	Sdccag8	chr1:176814660-177020432+
chr11	88185241	88185365	diffreps_peak_30963	0.559898	124	ENSMUST00000133149	Cuedc1	2.34174	0.275488	0.715248	up	Ensembl	1844	chr11:88099290-88185365+	exon sense-overlapping	NM_198013	Cuedc1	chr11:88099146-88194140+
chr10	91149721	91149940	diffreps_peak_20517	4.25973	219	ENSMUST00000180844	Gm26765	6.70649	5.49884e-05	0.000388244	up	Ensembl	692	chr10:91149515-91150594+	natural antisense	NM_001080131	Tmpo	chr10:91147571-91171619-
chr19	5111401	5111660	diffreps_peak_87570	0.194245	259	ENSMUST00000149806	Klc2	1.07901	0.639374	1	up	Ensembl	770	chr19:5110367-5111984-	exon sense-overlapping	ENSMUST00000116563	Klc2	chr19:5107746-5118560-
chr8	84892401	84892666	diffreps_peak_175049	6.15165	265	ENSMUST00000136462	Gcdh	6.7037	7.05258e-07	6.53295e-06	up	Ensembl	471	chr8:84890937-84892666-	exon sense-overlapping	ENSMUST00000109745	Gcdh	chr8:84886393-84893921-
chr8	71666741	71666940	diffreps_peak_173731	0.268489	199	ENSMUST00000175780	Unc13a	1.36713	0.538904	1	up	Ensembl	2569	chr8:71660346-71668082-	exon sense-overlapping	ENSMUST00000030170	Unc13a	chr8:71624417-71671757-
chr4	101356201	101356248	diffreps_peak_123190	0.332582	47	NR_040708	E130102H24Rik	1.6804	0.464963	0.988428	up	RefSeq	748	chr4:101346524-101356248-	intergenic
chr1	171283901	171284026	diffreps_peak_11553	1.24231	125	ENSMUST00000127101	Usp21	2.66094	0.0572383	0.217352	up	Ensembl	1966	chr1:171283520-171286950-	exon sense-overlapping	ENSMUST00000111305	Usp21	chr1:171281949-171287924-
chr16	31303541	31303678	diffreps_peak_68770	6.74023	137	ENSMUST00000155682	Apod	6.69756	1.81873e-07	1.94271e-06	up	Ensembl	422	chr16:31297513-31303678-	exon sense-overlapping	NM_001301353	Apod	chr16:31296192-31314808-
chr8	93810635	93810960	diffreps_peak_175584	0.134632	325	ENSMUST00000125695	Gnao1	1.04414	0.733446	1	up	Ensembl	935	chr8:93810636-93811767+	exon sense-overlapping	ENSMUST00000137202	Gnao1	chr8:93809966-93950403+
chr6	113283481	113283507	diffreps_peak_150874	0.00911239	26	ENSMUST00000128148	Cpne9	1.09018	0.979237	1	up	Ensembl	449	chr6:113282339-113283507+	exon sense-overlapping	NM_170673	Cpne9	chr6:113282307-113305571+
chr4	147281445	147281740	diffreps_peak_128194	7.1388	295	ENSMUST00000179385	Gm13144	6.68707	7.26449e-08	9.30115e-07	up	Ensembl	345	chr4:147281446-147281790-	intronic antisense	NM_001039209	Gm13152	chr4:147175866-147513420+
chr9	124441801	124441888	diffreps_peak_188544	0.22585	87	uc029xhf.1	BC095938	1.4649	0.594497	1	up	UCSC_knowngene	358	chr9:124441769-124442751-	intergenic
chr11	69354061	69354200	diffreps_peak_28477	0.385224	139	ENSMUST00000144332	Chd3	1.10247	0.411885	0.921988	up	Ensembl	432	chr11:69353870-69354467-	exon sense-overlapping	NM_146019	Chd3	chr11:69343273-69369426-
chr2	25407281	25407700	diffreps_peak_94033	0.322445	419	ENSMUST00000131185	Npdc1	1.23321	0.475943	1	up	Ensembl	1119	chr2:25407282-25409256+	exon sense-overlapping	ENSMUST00000154809	Npdc1	chr2:25403169-25407847+
chr11	4594602	4594863	diffreps_peak_23744	0.75263	261	ENSMUST00000130716	Mtmr3	1.83692	0.176754	0.524662	up	Ensembl	4040	chr11:4482559-4594863-	exon sense-overlapping	ENSMUST00000123506	Mtmr3	chr11:4480890-4528406-
chr16	84834841	84835040	diffreps_peak_72177	0.0904096	199	ENSMUST00000127651	Atp5j	1.02042	0.812064	1	up	Ensembl	927	chr16:84831071-84835298-	exon sense-overlapping	NM_001302216	Atp5j	chr16:84827871-84834998-
chr13	119429118	119429240	diffreps_peak_50367	2.75242	122	ENSMUST00000132304	Paip1	1.54853	0.00176841	0.0100216	up	Ensembl	1595	chr13:119429119-119457319+	exon sense-overlapping	ENSMUST00000026520	Paip1	chr13:119428922-119458218+
chr4	47453741	47454460	diffreps_peak_120111	0.568797	719	ENSMUST00000121539	Gm12430	1.39837	0.2699	0.705172	up	Ensembl	1322	chr4:47453632-47454953+	intergenic
chr10	105238181	105238292	diffreps_peak_21200	0.0834063	111	ENSMUST00000160554	Gm15662	1.23341	0.825266	1	up	Ensembl	159	chr10:105238134-105238292+	intronic antisense	NM_177368	Tmtc2	chr10:105187664-105574479-
chr2	69722721	69722957	diffreps_peak_97831	4.18035	236	ENSMUST00000153772	Ppig	6.67843	6.60157e-05	0.000461987	up	Ensembl	693	chr2:69722545-69723789+	intron sense-overlapping	NM_001081086	Ppig	chr2:69723088-69754059+
chr11	97138405	97139160	diffreps_peak_31640	0.38568	755	ENSMUST00000107613	Tbkbp1	1.54627	0.411453	0.921383	up	Ensembl	2173	chr11:97138406-97150048-	exon sense-overlapping	ENSMUST00000107615	Tbkbp1	chr11:97136173-97149712-
chr9	60598085	60598220	diffreps_peak_183508	3.36118	135	ENSMUST00000136388	Lrrc49	1.72407	0.000435333	0.0027365	up	Ensembl	728	chr9:60587822-60598589-	exon sense-overlapping	NM_001146046	Lrrc49	chr9:60587235-60688134-
chr8	4202301	4202700	diffreps_peak_168050	6.14623	399	ENSMUST00000177309	Evi5l	6.59072	7.14111e-07	6.60721e-06	up	Ensembl	1654	chr8:4191292-4203079+	exon sense-overlapping	ENSMUST00000176072	Evi5l	chr8:4166574-4208226+
chr8	84699070	84699258	diffreps_peak_174959	0.811488	188	ENSMUST00000175767	Trmt1	2.00898	0.154352	0.473817	up	Ensembl	502	chr8:84699071-84699786+	exon sense-overlapping	ENSMUST00000001974	Trmt1	chr8:84688866-84699808+
chr17	33959221	33959375	diffreps_peak_76507	0.0544222	154	ENSMUST00000173445	Vps52	1.11634	0.882222	1	up	Ensembl	659	chr17:33959009-33960504+	exon sense-overlapping	NM_172620	Vps52	chr17:33955882-33966488+
chr17	90863061	90863260	diffreps_peak_81348	0.731605	199	NR_045463	4930480K15Rik	1.2744	0.185522	0.544278	up	RefSeq	2199	chr17:90861169-90867102+	intronic antisense	ENSMUST00000160844	Nrxn1	chr17:90033644-91092805-
chr11	100706081	100706460	diffreps_peak_32509	0.0407788	379	ENSMUST00000126299	Kat2a	1.02402	0.910377	1	up	Ensembl	3269	chr11:100704746-100712449-	exon sense-overlapping	ENSMUST00000006973	Kat2a	chr11:100704746-100712465-
chr11	97690881	97691041	diffreps_peak_31932	5.97805	160	ENSMUST00000134003	Pcgf2	6.58579	1.05184e-06	9.40553e-06	up	Ensembl	811	chr11:97690528-97692409-	exon sense-overlapping	ENSMUST00000179765	Pcgf2	chr11:97688823-97699384-
chr2	92391021	92391141	diffreps_peak_99312	0.53605	120	ENSMUST00000149653	Mapk8ip1	1.42017	0.291038	0.74126	up	Ensembl	1816	chr2:92389902-92392732-	exon sense-overlapping	ENSMUST00000111279	Mapk8ip1	chr2:92383676-92392731-
chr5	100363841	100364220	diffreps_peak_136754	0.554697	379	ENSMUST00000182664	Sec31a	1.21487	0.278806	0.721204	up	Ensembl	600	chr5:100362146-100364270-	exon sense-overlapping	NM_026969	Sec31a	chr5:100361649-100416234-
chr7	29169481	29169680	diffreps_peak_157489	0.323866	199	uc009gay.1	Spred3	1.43862	0.474388	0.999449	up	UCSC_knowngene	759	chr7:29166527-29169841-	exon sense-overlapping	NM_182927	Spred3	chr7:29158829-29168647-
chr7	29155181	29155400	diffreps_peak_157465	0.165289	219	ENSMUST00000150431	Fam98c	1.53457	0.683457	1	up	Ensembl	1632	chr7:29152512-29156183-	exon sense-overlapping	ENSMUST00000153251	Fam98c	chr7:29152554-29155719-
chr9	62428941	62429053	diffreps_peak_183656	0.0236319	112	ENSMUST00000151604	Coro2b	1.02526	0.947039	1	up	Ensembl	816	chr9:62428263-62429250-	exon sense-overlapping	NM_175484	Coro2b	chr9:62419492-62537044-
chr6	124450001	124450172	diffreps_peak_152184	0.914037	171	ENSMUST00000147947	Clstn3	2.08382	0.121889	0.397178	up	Ensembl	765	chr6:124438904-124450172-	exon sense-overlapping	NM_153508	Clstn3	chr6:124430756-124464784-
chr7	45131981	45132137	diffreps_peak_159256	0.0928352	156	ENSMUST00000126371	Flt3l	1.21421	0.807541	1	up	Ensembl	810	chr7:45131708-45132607-	exon sense-overlapping	ENSMUST00000146760	Flt3l	chr7:45131189-45136432-
chrX	103013697	103013820	diffreps_peak_193887	0.664637	123	ENSMUST00000124538	Pabpc1l2b-ps	1.49687	0.216453	0.609238	up	Ensembl	690	chrX:103013698-103014387+	intergenic
chr10	80253601	80253783	diffreps_peak_18995	4.39017	182	ENSMUST00000155336	Ndufs7	6.5819	4.07218e-05	0.000292017	up	Ensembl	770	chr10:80253315-80255140+	exon sense-overlapping	NM_029272	Ndufs7	chr10:80249452-80256792+
chr2	175270781	175270980	diffreps_peak_105975	7.2841	199	ENSMUST00000121572	Gm14438	6.56983	5.19873e-08	7.2438e-07	up	Ensembl	624	chr2:175270556-175271179+	intronic antisense	NM_001177543	0610010B08Rik	chr2:175192005-175338212-
chr2	141838801	141838968	diffreps_peak_102639	0.00879361	167	ENSMUST00000119675	Fau-ps1	1.01892	0.979956	1	up	Ensembl	252	chr2:141838789-141839339+	intron sense-overlapping	NM_001013802	Macrod2	chr2:140395430-142390050+
chr2	93197561	93197748	diffreps_peak_99430	0.0348475	187	ENSMUST00000140172	Trp53i11	1.01282	0.922895	1	up	Ensembl	1752	chr2:93187561-93200308+	exon sense-overlapping	ENSMUST00000150462	Trp53i11	chr2:93187548-93198919+
chrX	152923452	152923540	diffreps_peak_196481	3.79385	88	ENSMUST00000083065	Gm26035	6.552	0.000160748	0.00107196	up	Ensembl	308	chrX:152923453-152923760-	intergenic
chr5	121452041	121452370	diffreps_peak_139534	6.56138	329	uc008zjh.1	Tmem116	6.48532	2.74546e-07	2.77943e-06	up	UCSC_knowngene	2220	chr5:121451893-121524182+	exon sense-overlapping	ENSMUST00000094357	Tmem116	chr5:121463181-121495421+
chr10	81470741	81470807	diffreps_peak_19757	0.0729745	66	ENSMUST00000145375	Celf5	1.03754	0.845328	1	up	Ensembl	605	chr10:81467015-81470807-	exon sense-overlapping	ENSMUST00000120508	Celf5	chr10:81461548-81482684-
chr1	54194981	54195168	diffreps_peak_3555	0.456328	187	ENSMUST00000146850	Hecw2	1.89379	0.349681	0.835565	up	Ensembl	1933	chr1:53941496-54195168-	exon sense-overlapping	ENSMUST00000097741	Hecw2	chr1:53930813-54195034-
chr11	11954941	11955140	diffreps_peak_24370	4.40903	199	ENSMUST00000142877	Grb10	6.42621	3.89915e-05	0.000280298	up	Ensembl	3341	chr11:11949600-11956024-	exon sense-overlapping	ENSMUST00000093321	Grb10	chr11:11930508-12037401-
chr11	69676621	69676840	diffreps_peak_28599	0.34783	219	ENSMUST00000135372	Senp3	1.13821	0.448921	0.969836	up	Ensembl	517	chr11:69674233-69676947-	exon sense-overlapping	ENSMUST00000005336	Senp3	chr11:69673115-69681846-
chr4	135323901	135324109	diffreps_peak_126631	0.373868	208	ENSMUST00000136570	Srrm1	1.20266	0.422797	0.93658	up	Ensembl	373	chr4:135323768-135324849-	exon sense-overlapping	ENSMUST00000140050	Srrm1	chr4:135322290-135327223-
chr16	95712085	95712380	diffreps_peak_73004	1.43198	295	ENSMUST00000143554	Ets2	1.57895	0.0369842	0.15062	up	Ensembl	928	chr16:95702500-95712564+	exon sense-overlapping	ENSMUST00000023612	Ets2	chr16:95702075-95721051+
chr10	18743661	18743860	diffreps_peak_14384	0.367379	199	uc007emp.1	AK139076	1.27019	0.429162	0.944915	up	UCSC_knowngene	1174	chr10:18743471-18837979+	natural antisense	ENSMUST00000055107	Gm4922	chr10:18779813-18785011-
chr1	37488501	37488720	diffreps_peak_2497	0.444145	219	ENSMUST00000151866	4930594C11Rik	1.90777	0.359629	0.850516	up	Ensembl	1790	chr1:37487193-37488982-	intron sense-overlapping	ENSMUST00000042161	Mgat4a	chr1:37439340-37536235-
chr17	35139381	35139600	diffreps_peak_76771	0.0815821	219	ENSMUST00000172925	Bag6	1.04026	0.828739	1	up	Ensembl	880	chr17:35138573-35139850+	exon sense-overlapping	NM_001252468	Bag6	chr17:35135178-35147322+
chr8	122683601	122683680	diffreps_peak_177864	1.44508	79	ENSMUST00000128586	Gm15899	6.41667	0.0358856	0.146803	up	Ensembl	238	chr8:122683602-122683839-	intronic antisense	ENSMUST00000127664	Gm20388	chr8:119910841-124345722+
chr4	45300413	45300540	diffreps_peak_119796	0.214183	127	ENSMUST00000141659	Trmt10b	1.11117	0.610685	1	up	Ensembl	963	chr4:45300414-45308721+	exon sense-overlapping	ENSMUST00000144781	Trmt10b	chr4:45297155-45304388+
chr19	4111581	4111800	diffreps_peak_87222	0.0800513	219	ENSMUST00000128798	Pitpnm1	1.01927	0.831666	1	up	Ensembl	733	chr19:4111161-4112371+	exon sense-overlapping	ENSMUST00000100022	Pitpnm1	chr19:4100622-4113965+
chr2	28545292	28545520	diffreps_peak_94585	0.671744	228	ENSMUST00000128680	Ralgds	1.38759	0.212939	0.602033	up	Ensembl	722	chr2:28545293-28547220+	exon sense-overlapping	NM_001145834	Ralgds	chr2:28513167-28553082+
chr11	28957241	28957600	diffreps_peak_25133	5.16985	359	ENSMUST00000121462	Rpsa-ps5	6.3903	6.76309e-06	5.34451e-05	up	Ensembl	885	chr11:28956724-28957608+	intergenic
chr11	43745017	43745160	diffreps_peak_26144	0.0693092	143	ENSMUST00000147984	Ttc1	1.06089	0.852493	1	up	Ensembl	501	chr11:43745018-43747992-	exon sense-overlapping	ENSMUST00000109278	Ttc1	chr11:43729512-43748008-
chr7	25696917	25697060	diffreps_peak_156814	4.29598	143	ENSMUST00000171757	Tgfb1	6.37471	5.05846e-05	0.000358681	up	Ensembl	495	chr7:25692418-25697174+	exon sense-overlapping	ENSMUST00000002678	Tgfb1	chr7:25687002-25705077+
chr11	59731477	59731628	diffreps_peak_27482	4.95394	151	NR_045476	1700007J10Rik	1.49881	1.11188e-05	8.54512e-05	up	RefSeq	1111	chr11:59725917-59740154-	natural antisense	ENSMUST00000108751	Mprip	chr11:59662507-59776223+
chr11	119942581	119942698	diffreps_peak_35281	0.0419953	117	ENSMUST00000129379	Gm11767	1.18189	0.90783	1	up	Ensembl	493	chr11:119935803-119942698-	bidirectional	ENSMUST00000106231	Baiap2	chr11:119942763-120002621+
chr11	58042701	58042900	diffreps_peak_27300	0.0841101	199	ENSMUST00000140500	Larp1	1.06598	0.823929	1	up	Ensembl	747	chr11:58041613-58043013+	exon sense-overlapping	ENSMUST00000071487	Larp1	chr11:58009064-58062031+
chr5	31168081	31168440	diffreps_peak_132186	8.03984	359	ENSMUST00000133520	Gtf3c2	6.35383	9.1234e-09	2.42233e-07	up	Ensembl	2328	chr5:31167131-31179909-	exon sense-overlapping	ENSMUST00000153504	Gtf3c2	chr5:31173921-31174821-
chr8	83566757	83567040	diffreps_peak_174477	1.07516	283	ENSMUST00000127162	Ndufb7	1.75785	0.0841087	0.297829	up	Ensembl	4435	chr8:83566758-83571626+	exon sense-overlapping	ENSMUST00000036996	Ndufb7	chr8:83566671-83571626+
chr11	83990941	83991160	diffreps_peak_30597	0.0606492	219	ENSMUST00000142966	Synrg	1.0702	0.869663	1	up	Ensembl	618	chr11:83989811-83991287+	exon sense-overlapping	ENSMUST00000183456	Synrg	chr11:83964476-84040928+
chrX	74170652	74171080	diffreps_peak_192195	7.12948	428	ENSMUST00000117131	Rpl3-ps2	6.34435	7.42203e-08	9.44388e-07	up	Ensembl	1214	chrX:74170653-74171866+	intergenic
chr7	126372411	126372919	diffreps_peak_165958	6.70073	508	ENSMUST00000137263	Spns1	6.33558	1.99192e-07	2.10023e-06	up	Ensembl	821	chr7:126371220-126372919-	exon sense-overlapping	NM_023712	Spns1	chr7:126370060-126377934-
chr17	26090181	26090329	diffreps_peak_75374	4.20746	148	ENSMUST00000137672	Decr2	6.3114	6.20215e-05	0.000435204	up	Ensembl	474	chr17:26087421-26090329-	exon sense-overlapping	ENSMUST00000040907	Decr2	chr17:26081211-26090300-
chr17	35830942	35831140	diffreps_peak_76942	1.21219	198	ENSMUST00000174297	Flot1	1.69997	0.0613499	0.229581	up	Ensembl	682	chr17:35830638-35831470+	exon sense-overlapping	ENSMUST00000174080	Flot1	chr17:35823347-35832610+
chr2	28548112	28548200	diffreps_peak_94596	0.0249873	88	ENSMUST00000130281	Ralgds	1.00798	0.944089	1	up	Ensembl	582	chr2:28547550-28548976+	exon sense-overlapping	NM_009058	Ralgds	chr2:28513167-28553082+
chr16	20651715	20651980	diffreps_peak_68122	0.9105	265	ENSMUST00000169195	Psmd2	1.41402	0.122885	0.399153	up	Ensembl	747	chr16:20651716-20652754+	exon sense-overlapping	ENSMUST00000007212	Psmd2	chr16:20651652-20663414+
chr17	56575101	56575300	diffreps_peak_78958	0.0833495	199	ENSMUST00000134741	Safb2	1.16228	0.825373	1	up	Ensembl	2107	chr17:56570081-56575519-	exon sense-overlapping	ENSMUST00000075510	Safb2	chr17:56562939-56584585-
chr16	14067402	14067700	diffreps_peak_67433	0.0794707	298	ENSMUST00000119046	Gm15808	1.10808	0.832778	1	up	Ensembl	604	chr16:14067403-14068006+	intron sense-overlapping	ENSMUST00000131608	2900011O08Rik	chr16:13986674-14095987+
chr9	68767641	68767840	diffreps_peak_184136	8.52595	199	NR_033299	9530091C08Rik	6.29748	2.97884e-09	1.60662e-07	up	RefSeq	7977	chr9:68765346-68773322+	intron sense-overlapping	ENSMUST00000034766	Rora	chr9:68653786-69388246+
chr4	115998481	115998820	diffreps_peak_124151	0.179743	339	ENSMUST00000133225	Faah	1.1759	0.661085	1	up	Ensembl	790	chr4:115998306-116000068-	exon sense-overlapping	ENSMUST00000049095	Faah	chr4:115996669-116017926-
chr15	74080281	74080520	diffreps_peak_62112	1.22033	239	ENSMUST00000100555	Gm7935	13.4	0.0602102	0.226061	up	Ensembl	1278	chr15:74080234-74081511-	intergenic
chr4	155753881	155754138	diffreps_peak_129611	6.90257	257	ENSMUST00000176043	Atad3a	6.29169	1.25149e-07	1.42543e-06	up	Ensembl	854	chr4:155753616-155761068-	exon sense-overlapping	ENSMUST00000030903	Atad3a	chr4:155740641-155761093-
chr6	128530917	128530980	diffreps_peak_152697	0.550449	63	ENSMUST00000080061	Gm8724	1.7556	0.281547	0.72604	up	Ensembl	387	chr6:128530918-128531304-	intergenic
chr9	15350810	15351000	diffreps_peak_179483	0.431433	190	ENSMUST00000162689	5830418K08Rik	1.40293	0.370311	0.865404	up	Ensembl	2999	chr9:15344662-15351434-	exon sense-overlapping	ENSMUST00000161795	5830418K08Rik	chr9:15317097-15354710-
chr18	77780001	77780200	diffreps_peak_86310	0.0305277	199	ENSMUST00000146869	Atp5a1	1.02847	0.932121	1	up	Ensembl	816	chr18:77779832-77781889+	exon sense-overlapping	NM_007505	Atp5a1	chr18:77773768-77782868+
chr7	101302221	101302251	diffreps_peak_163977	0.439994	30	ENSMUST00000139609	Atg16l2	1.30405	0.363083	0.855281	up	Ensembl	2655	chr7:101289626-101302251-	exon sense-overlapping	ENSMUST00000120267	Atg16l2	chr7:101289615-101302088-
chr10	13967041	13967089	diffreps_peak_14055	0.0403168	48	ENSMUST00000181888	Gm26835	1.05634	0.911346	1	up	Ensembl	3274	chr10:13967024-14007405-	intronic antisense	NM_010437	Hivep2	chr10:13966379-14151378+
chr14	8799921	8800120	diffreps_peak_50768	0.022325	199	ENSMUST00000052615	Gm9800	1.00048	0.949894	1	up	Ensembl	914	chr14:8799589-8800504-	intergenic
chr10	40349201	40349575	diffreps_peak_15710	0.428414	374	ENSMUST00000143103	4930520K10Rik	1.26412	0.372895	0.869418	up	Ensembl	1124	chr10:40348508-40350103-	natural antisense	NM_001168304	Cdk19	chr10:40349308-40483818+
chr4	135968721	135969317	diffreps_peak_126699	5.86807	596	ENSMUST00000156948	Lypla2	6.24643	1.35497e-06	1.18794e-05	up	Ensembl	929	chr4:135968701-135970470-	exon sense-overlapping	ENSMUST00000105852	Lypla2	chr4:135968224-135971929-
chr7	30313472	30313598	diffreps_peak_157667	7.28988	126	ENSMUST00000135882	Alkbh6	6.24522	5.13001e-08	7.17458e-07	up	Ensembl	545	chr7:30312675-30314304+	exon sense-overlapping	ENSMUST00000136887	Alkbh6	chr7:30308777-30314154+
chr14	55073081	55073280	diffreps_peak_54140	0.0390045	199	uc007txy.2	Thtpa	1.02368	0.914104	1	up	UCSC_knowngene	4251	chr14:55055493-55098995+	natural antisense	NM_001039198	Zfhx2	chr14:55061659-55092048-
chr18	61743277	61743440	diffreps_peak_85266	1.15891	163	ENSMUST00000147278	Afap1l1	1.70005	0.0693569	0.254266	up	Ensembl	2960	chr18:61730939-61786660-	exon sense-overlapping	ENSMUST00000120472	Afap1l1	chr18:61730261-61786702-
chr17	26561341	26561496	diffreps_peak_75424	6.1995	155	ENSMUST00000011196	1700049J03Rik	6.22652	6.31681e-07	5.91107e-06	up	Ensembl	418	chr17:26554254-26561496-	natural antisense	ENSMUST00000167662	Ergic1	chr17:26561489-26656931+
chr17	56183381	56183640	diffreps_peak_78738	0.177537	259	ENSMUST00000151093	D17Wsu104e	1.49024	0.664452	1	up	Ensembl	445	chr17:56179386-56183664-	exon sense-overlapping	ENSMUST00000019723	D17Wsu104e	chr17:56175744-56183920-
chr13	55508781	55508980	diffreps_peak_47031	0.145036	199	ENSMUST00000128911	Pdlim7	1.08788	0.716083	1	up	Ensembl	450	chr13:55507552-55509020-	exon sense-overlapping	ENSMUST00000153426	Pdlim7	chr13:55508966-55512709-
chr9	80285661	80285821	diffreps_peak_184964	0.812442	160	ENSMUST00000156199	Myo6	1.50186	0.154013	0.47303	up	Ensembl	635	chr9:80285414-80286508+	exon sense-overlapping	ENSMUST00000113268	Myo6	chr9:80165040-80311728+
chr19	6346201	6346293	diffreps_peak_88019	3.71072	92	ENSMUST00000126841	Map4k2	6.20647	0.000194662	0.00128376	up	Ensembl	611	chr19:6345350-6346293+	exon sense-overlapping	NM_009006	Map4k2	chr19:6341160-6355619+
chr6	54177661	54177683	diffreps_peak_146887	0.158378	22	ENSMUST00000112504	Gm15526	1.09022	0.69442	1	up	Ensembl	204	chr6:54177480-54177683-	intronic antisense	ENSMUST00000127323	Chn2	chr6:54040086-54195872+
chr11	3352290	3352540	diffreps_peak_23521	3.61011	250	ENSMUST00000148771	Limk2	6.20185	0.000245409	0.00159536	up	Ensembl	716	chr11:3350392-3352817-	exon sense-overlapping	NM_010718	Limk2	chr11:3343297-3409238-
chrX	84063401	84063640	diffreps_peak_192980	0.971615	239	ENSMUST00000118590	Gm14769	1.2555	0.106754	0.360289	up	Ensembl	432	chrX:84063333-84063764+	intron sense-overlapping	NM_007868	Dmd	chrX:82948870-85205050+
chr1	165461161	165461520	diffreps_peak_11147	1.44897	359	uc007djc.1	AK008044	1.42757	0.035566	0.145662	up	UCSC_knowngene	4015	chr1:165460637-165464651+	exon sense-overlapping	NM_027430	Mpc2	chr1:165461208-165481214+
chr4	119349661	119349874	diffreps_peak_124507	0.619931	213	ENSMUST00000124048	Ccdc30	1.43507	0.239921	0.655743	up	Ensembl	1980	chr4:119348597-119359894-	exon sense-overlapping	ENSMUST00000044781	Ccdc30	chr4:119352246-119383760-
chr2	97949581	97949679	diffreps_peak_99776	0.149322	98	ENSMUST00000077089	Gm13803	1.20924	0.709053	1	up	Ensembl	318	chr2:97949362-97949679-	intergenic
chr4	155886041	155886156	diffreps_peak_129675	3.68348	115	ENSMUST00000134678	Cpsf3l	6.16961	0.000207264	0.00136228	up	Ensembl	2197	chr4:155869546-155888699+	exon sense-overlapping	ENSMUST00000030901	Cpsf3l	chr4:155869546-155889103+
[truncated: 2,240 more rows]

## Sheet: down.MCAO_vs_Sham
Differentially methylated RNA sites for: down.MCAO_vs_Sham Fold change cut-off: 1 P-value cut-off: 1 Column A ~ E: the coordinates of the differentially methylated RNA sites in bed format, please ref http://genome.ucsc.edu/FAQ/FAQformat.html#format1. Column F: the length of the methylated RNA sites Column G ~ H: the transcript id and gene symbol of differentially methylated LncRNA. Column I ~ L: …
[truncated: 3,542 more rows]
